# Supplementary material for: Electrochemical 1,5-chlorosulfonylation and 1,5-hydrosulfonylation of vinylcyclopropanes
Source: Royal Society of Chemistry journal article supplement (doi:10.1039/d4qo01228c), 2024-01-01
Supplement: d4qo01228c1.pdf [file d4qo01228c1.pdf]

## **Electrochemical 1,5-Chlorosulfonylation and 1,5-Hydrosulfonylation of Vinylcyclopropanes**

Xin Zhang, Wei Li, Yuxiang Zhou, Sihui Lv, Lichun Xu, Lou Shi,\* Yanni Li,\* and Deqiang Liang\*

<sup>a</sup>Yunnan Key Laboratory of Metal-Organic Molecular Materials and Device, School of Chemistry and Chemical Engineering, Kunming University, Kunming 650214, China

\*Email: shil090@nenu.edu.cn

\*Email: liyanni@kmu.edu.cn

\*Email: liangdq695@nenu.edu.cn

## Table of Contents

|                                                                                                            |             |
|------------------------------------------------------------------------------------------------------------|-------------|
| <b>I. General considerations.....</b>                                                                      | <b>S1</b>   |
| <b>II. Optimization of reaction conditions .....</b>                                                       | <b>S3</b>   |
| <b>III. Experimental procedures.....</b>                                                                   | <b>S9</b>   |
| 1. General procedure for the 1,5-chlorosulfonylation and 1,5-hydrosulfonylation of vinylcyclopropanes..... | S9          |
| 2. Gram-scale synthesis.....                                                                               | S10         |
| 3. Transformations of the products .....                                                                   | S11         |
| <b>IV. Mechanistic investigations.....</b>                                                                 | <b>S11</b>  |
| 1. Quenching experiments.....                                                                              | S12         |
| 2. Electricity on-off experiments.....                                                                     | S12         |
| 3. Reaction kinetic profiles.....                                                                          | S13         |
| 4. Cyclic voltammetry studies.....                                                                         | S15         |
| <b>V. Spectral data of products .....</b>                                                                  | <b>S17</b>  |
| <b>VI. General procedure for the synthesis of vinylcyclopropane substrates 1 .....</b>                     | <b>S63</b>  |
| <b>VII. Copies of <sup>1</sup>H, <sup>19</sup>F, <sup>13</sup>C and DEPT NMR spectra .....</b>             | <b>S70</b>  |
| <b>VIII. References .....</b>                                                                              | <b>S258</b> |

## I. General considerations

Unless otherwise stated, commercially available chemicals were used without treatment. Solvents were degassed by bubbling Ar for 10 min before use. Reactions were monitored by Thin Layer Chromatography (TLC) using silica gel F254 plates. Products were purified by column chromatography over 300-400 mesh silica gel under a positive pressure of air.  $^1\text{H}$  NMR,  $^{19}\text{F}$  NMR,  $^{13}\text{C}$  NMR and DEPT NMR spectra were recorded at 25 °C on a Bruker Ascend™ 400 spectrometer using tetramethylsilane (TMS) as an internal standard. High-resolution mass spectra (HRMS) were obtained using a Bruker microTOF II Focus spectrometer (ESI). The Electrolysis was performed using a DJS-292B dual display potentiostat (Shanghai Xinrui Instruments Co., China). The electrochemical setup used in this research is shown in Figure S1.

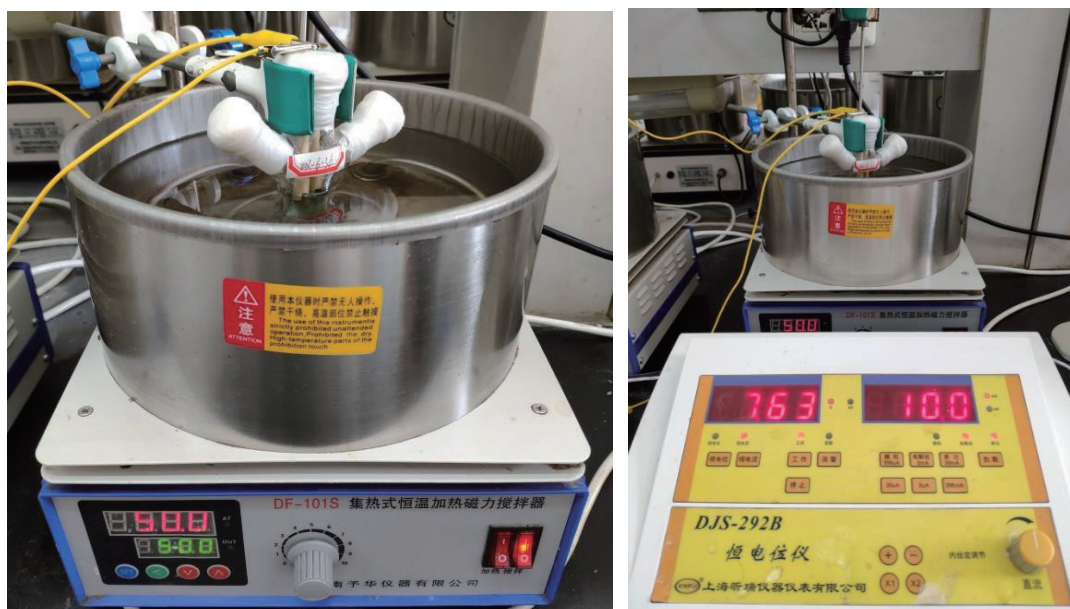

Figure S1 Electrochemical setup

## II. Optimization of reaction conditions

Table S1 Solvent screening<sup>a</sup>

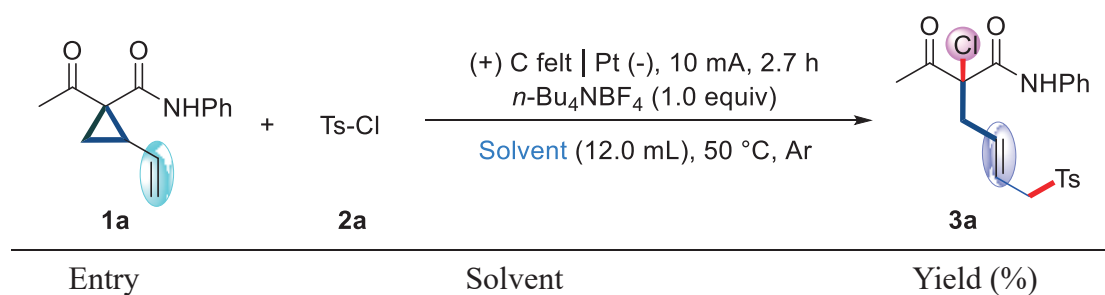

|          |                                  |           |
|----------|----------------------------------|-----------|
| 1        | DCE                              | 14        |
| 2        | PhCF <sub>3</sub>                | 11        |
| 3        | THF                              | 31        |
| 4        | Acetone                          | 29        |
| 5        | DMF                              | nr        |
| 6        | DMSO                             | <5        |
| 7        | MeOH                             | 0         |
| 8        | HFIP                             | <5        |
| <b>9</b> | <b>MeCN</b>                      | <b>38</b> |
| 10       | MeCN/H <sub>2</sub> O (9:1, v/v) | 19        |
| 11       | MeCN/MeOH (9:1, v/v)             | 17        |
| 12       | MeCN/HFIP (9:1, v/v)             | 32        |

<sup>a</sup> Reaction conditions: **1a** (0.5 mmol), **2a** (0.6 mmol), *n*-Bu<sub>4</sub>NBF<sub>4</sub> (0.5 mmol), solvent (12.0 mL), graphite felt anode (15 mm × 15 mm × 2 mm), platinum plate cathode (15 mm × 15 mm × 0.3 mm), undivided cell, constant current = 10.0 mA, Ar, 50 °C, 2.7 h, isolated yields.

**Table S2** Additive screening<sup>a</sup>

Reaction scheme: **1a** + **2a** (Ts-Cl) → **3a**. Conditions: (+) C felt | Pt (-), 10 mA, 2.7 h; *n*-Bu<sub>4</sub>NBF<sub>4</sub> (1.0 equiv), Additive; MeCN (12.0 mL), 50 °C, Ar.

| Entry    | Additive (equiv)        | Yield (%) |
|----------|-------------------------|-----------|
| 1        | LiCl (0.5)              | 10        |
| 2        | NaCl (0.5)              | 27        |
| 3        | KCl (0.5)               | 14        |
| 4        | CsCl (0.5)              | 10        |
| 5        | TBAC (0.5)              | 16        |
| 6        | AgNO <sub>3</sub> (1.0) | 0         |
| 7        | AgNO <sub>3</sub> (2.0) | 0         |
| <b>8</b> | <b>None</b>             | <b>38</b> |

<sup>a</sup> Reaction conditions: **1a** (0.5 mmol), **2a** (0.6 mmol), *n*-Bu<sub>4</sub>NBF<sub>4</sub> (0.5 mmol), MeCN (12.0 mL), graphite felt anode (15 mm × 15 mm × 2 mm), platinum plate cathode

(15 mm × 15 mm × 0.3 mm), undivided cell, constant current = 10.0 mA, Ar, 50 °C, 2.7 h, isolated yields.

**Table S3** Acid screening<sup>a</sup>

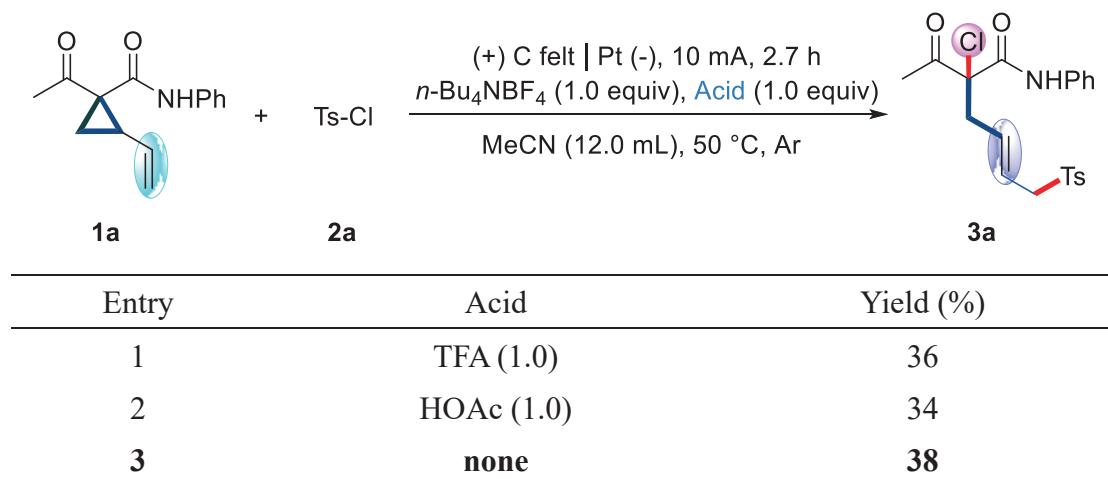

<sup>a</sup> Reaction conditions: **1a** (0.5 mmol), **2a** (0.6 mmol), *n*-Bu<sub>4</sub>NBF<sub>4</sub> (0.5 mmol), acid (0.5 mmol), MeCN (12.0 mL), graphite felt anode (15 mm × 15 mm × 2 mm), platinum plate cathode (15 mm × 15 mm × 0.3 mm), undivided cell, constant current = 10.0 mA, Ar, 50 °C, 2.7 h, isolated yields.

**Table S4** Base screening<sup>a</sup>

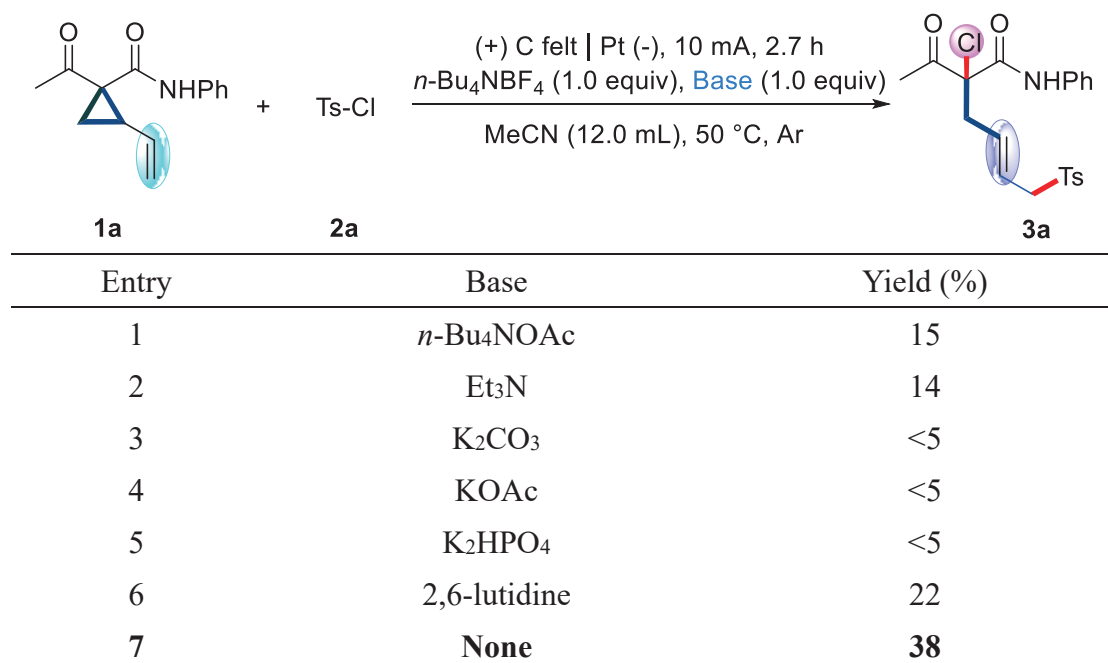

<sup>a</sup> Reaction conditions: **1a** (0.5 mmol), **2a** (0.6 mmol), *n*-Bu<sub>4</sub>NBF<sub>4</sub> (0.5 mmol), base (0.5 mmol), MeCN (12.0 mL), graphite felt anode (15 mm × 15 mm × 2 mm), platinum plate cathode (15 mm × 15 mm × 0.3 mm), undivided cell, constant current = 10.0 mA,

Ar, 50 °C, 2.7 h, isolated yields.

**Table S5** Electrode screening<sup>a</sup>

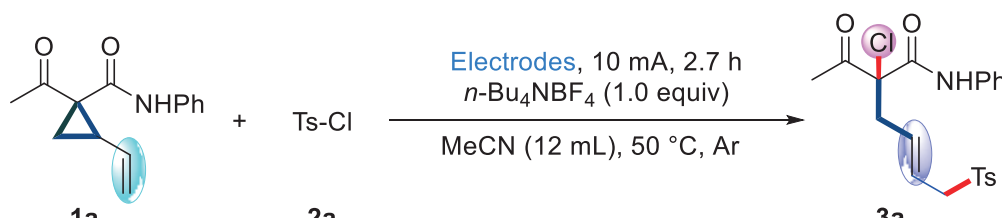

**1a** + **2a**  $\xrightarrow[\text{MeCN (12 mL), 50 }^\circ\text{C, Ar}]{\text{Electrodes, 10 mA, 2.7 h, } n\text{-Bu}_4\text{NBF}_4 \text{ (1.0 equiv)}}$  **3a**

| Entry    | Anode              | Cathode            | Yield (%) |
|----------|--------------------|--------------------|-----------|
| 1        | C felt             | stainless steel    | 30        |
| 2        | C felt             | Ni plate           | 18        |
| <b>3</b> | <b>C felt</b>      | <b>Ni foam</b>     | <b>44</b> |
| 4        | C felt             | Cu foam            | <5        |
| 5        | C felt             | C cloth            | 26        |
| 6        | C felt             | C felt             | 7         |
| 7        | C felt             | C rod <sup>b</sup> | 7         |
| 8        | C felt             | Pt plate           | 38        |
| 9        | C cloth            | Ni foam            | 13        |
| 10       | C rod <sup>b</sup> | Ni foam            | nr        |
| 11       | Pt plate           | Ni foam            | 19        |

<sup>a</sup> Reaction conditions: **1a** (0.5 mmol), **2a** (0.6 mmol), *n*-Bu<sub>4</sub>NBF<sub>4</sub> (0.5 mmol), MeCN (12.0 mL), electrodes (15 mm × 15 mm), undivided cell, constant current = 10.0 mA, Ar, 50 °C, 2.7 h, isolated yields. <sup>b</sup> Ø 6 mm.

**Table S6** Electrolyte screening<sup>a</sup>

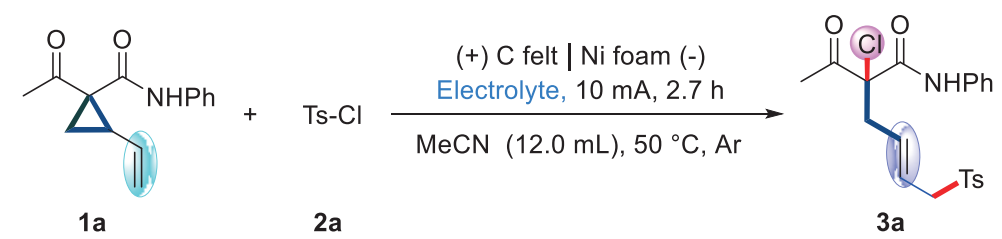

**1a** + **2a**  $\xrightarrow[\text{MeCN (12.0 mL), 50 }^\circ\text{C, Ar}]{\text{Electrolyte, 10 mA, 2.7 h, (+) C felt | Ni foam (-)}}$  **3a**

| Entry | Electrolyte (equiv)                               | Yield (%) |
|-------|---------------------------------------------------|-----------|
| 1     | LiClO <sub>4</sub> (1.0)                          | 29        |
| 2     | <i>n</i> -Et <sub>4</sub> NBF <sub>4</sub> (1.0)  | 32        |
| 3     | <i>n</i> -Bu <sub>4</sub> NPF <sub>6</sub> (1.0)  | 27        |
| 4     | <i>n</i> -Bu <sub>4</sub> NOAc (1.0)              | 25        |
| 5     | <i>n</i> -Bu <sub>4</sub> NClO <sub>4</sub> (1.0) | 24        |
| 6     | TBAI (1.0)                                        | 0         |

|    |                                                  |    |
|----|--------------------------------------------------|----|
| 7  | TBAB (1.0)                                       | <5 |
| 8  | <i>n</i> -Bu <sub>4</sub> NBF <sub>4</sub> (1.0) | 44 |
| 9  | <i>n</i> -Bu <sub>4</sub> NBF <sub>4</sub> (0.3) | 27 |
| 10 | <i>n</i> -Bu <sub>4</sub> NBF <sub>4</sub> (0.5) | 35 |
| 11 | <i>n</i> -Bu <sub>4</sub> NBF <sub>4</sub> (1.5) | 44 |
| 12 | <i>n</i> -Bu <sub>4</sub> NBF <sub>4</sub> (2.0) | 43 |

<sup>a</sup> Reaction conditions: **1a** (0.5 mmol), **2a** (0.6 mmol), MeCN (12.0 mL), graphite felt anode (15 mm × 15 mm × 2 mm), nickel foam cathode (15 mm × 15 mm × 1.5 mm), undivided cell, constant current = 10.0 mA, Ar, 50 °C, 2.7 h, isolated yields.

**Table S7** Temperature, substrate loading and atmosphere optimization<sup>a</sup>

(+) C felt | Ni foam (-), 10 mA, 2.7 h  
*n*-Bu<sub>4</sub>NBF<sub>4</sub> (1.0 equiv)  
 MeCN (12.0 mL), *T*, Atmosphere

| Entry | <i>T</i> (°C) | X (equiv)  | Atmosphere        | Yield (%) |
|-------|---------------|------------|-------------------|-----------|
| 1     | 35            | 1.2        | Ar                | 40        |
| 2     | <b>50</b>     | <b>1.2</b> | <b>Ar</b>         | <b>44</b> |
| 3     | 50            | 1.5        | Ar                | 42        |
| 4     | 50            | 2.0        | Ar                | 5         |
| 5     | 50            | 1.2        | in air and sealed | 19        |

<sup>a</sup> Reaction conditions: **1a** (0.5 mmol), **2a** (0.6 mmol), *n*-Bu<sub>4</sub>NBF<sub>4</sub> (0.5 mmol), MeCN (12.0 mL), graphite felt anode (15 mm × 15 mm × 2 mm), nickel foam cathode (15 mm × 15 mm × 1.5 mm), undivided cell, constant current = 10.0 mA, 2.7 h, isolated yields.

**Table S8** Current and time optimization<sup>a</sup>

(+) C felt | Ni foam (-), *I*, *t*  
*n*-Bu<sub>4</sub>NBF<sub>4</sub> (1.0 equiv)  
 MeCN (12.0 mL), 50 °C, Ar

| Entry | <i>I</i> (mA), <i>t</i> (h) | Yield (%) |
|-------|-----------------------------|-----------|
| 1     | 0, 12                       | 0         |

|          |                |           |
|----------|----------------|-----------|
| 2        | 5, 5.4         | 21        |
| 3        | 8, 3.4         | 29        |
| 4        | 10, 2.7        | 44        |
| 5        | 12, 2.2        | 43        |
| 6        | 15, 1.8        | 34        |
| 7        | 10, 3.5        | 27        |
| 8        | 10, 3.0        | 32        |
| <b>9</b> | <b>10, 2.3</b> | <b>47</b> |
| 10       | 10, 2.0        | 18        |
| 11       | 10, 1.7        | 26        |
| 12       | 10, 1.4        | 24        |

<sup>a</sup> Reaction conditions: **1a** (0.5 mmol), **2a** (0.6 mmol), *n*-Bu<sub>4</sub>NBF<sub>4</sub> (0.5 mmol), MeCN (12.0 mL), graphite felt anode (15 mm × 15 mm × 2 mm), nickel foam cathode (15 mm × 15 mm × 1.5 mm), undivided cell, constant current, Ar, 50 °C, time, isolated yields.

**Table S9** Sacrificial additive screening<sup>a</sup>

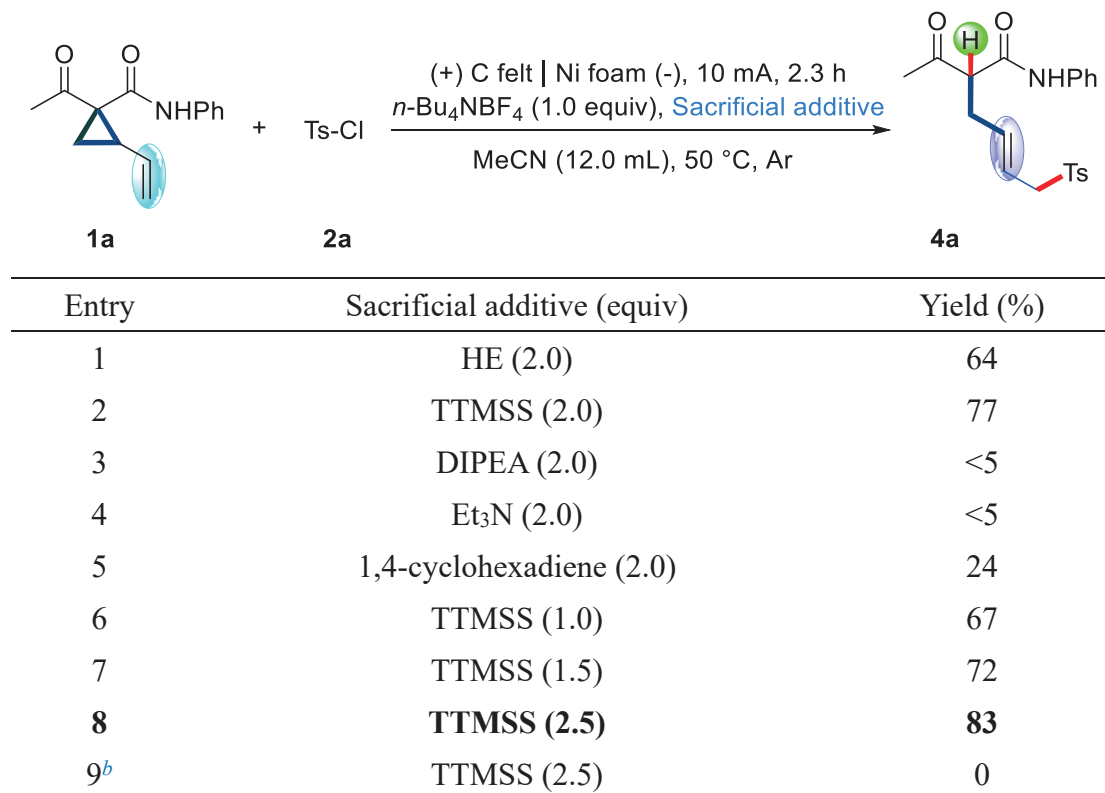

<sup>a</sup> Reaction conditions: **1a** (0.5 mmol), **2a** (0.6 mmol), *n*-Bu<sub>4</sub>NBF<sub>4</sub> (0.5 mmol), sacrificial additive, MeCN (12.0 mL), graphite felt anode (15 mm × 15 mm × 2 mm), nickel



foam cathode (15 mm × 15 mm × 1.5 mm), undivided cell, constant current = 10 mA, Ar, 50 °C, 2.3 h, isolated yields. <sup>b</sup> No electric current, Ar, 50 °C.

### III. Experimental procedures

#### 1. General procedure for the 1,5-chlorosulfonylation and 1,5-hydrosulfonylation of vinylcyclopropanes

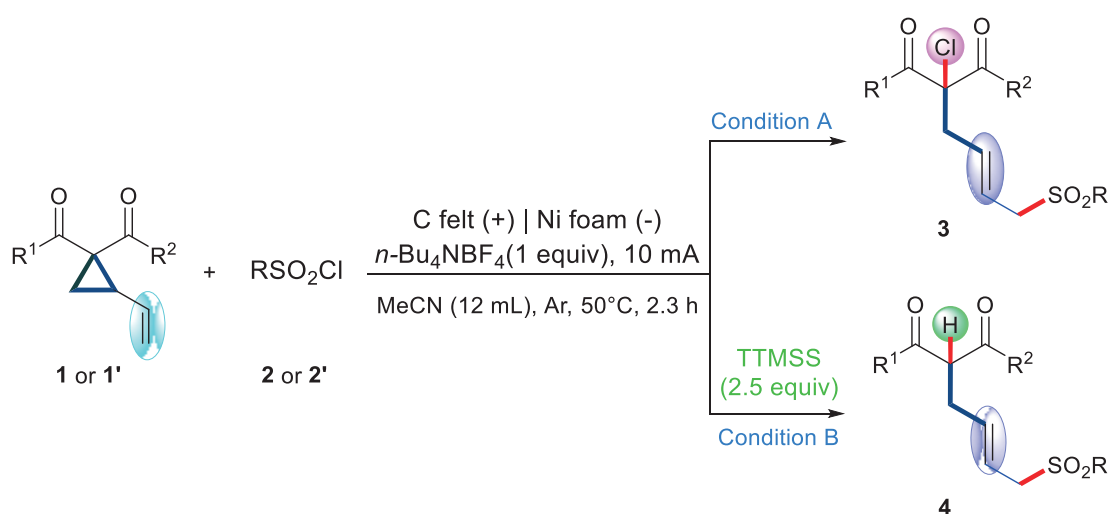

Condition A: A custom-made undivided cell (Figure S1) equipped with a stir bar, a graphite felt anode (15 mm × 15 mm × 2 mm), and a nickel foam cathode (15 mm × 15 mm × 1.5 mm) was used. Under an argon atmosphere, vinylcyclopropane **1** or **1'** (0.5 mmol), electrolyte *n*-Bu<sub>4</sub>NBF<sub>4</sub> (1.0 equiv, 0.5 mmol, 0.1646 g), and sulfonyl chloride (1.2 equiv, 0.6 mmol) were added to the cell (if the sulfonyl chloride is solid, dissolve it in 2.0 mL of degassed acetonitrile before adding; if it is liquid, add it directly using a microsyringe). For **Condition B**, tris(trimethylsilyl)silane (TTMSS, 2.5 equiv, 1.25 mmol, 0.386 mL) was added at this point. Finally, degassed acetonitrile was added, bringing the total solvent volume to 12.0 mL. The mixture was electrolyzed with stirring using a constant current of 10.0 mA at 50 °C (oil bath) for 2.3 hours (138 minutes). The residue obtained after evaporation of the solvent was purified by column chromatography on silica gel (petroleum ether–ethyl acetate) to afford products **3** or **4**.

## 2. Gram-scale synthesis

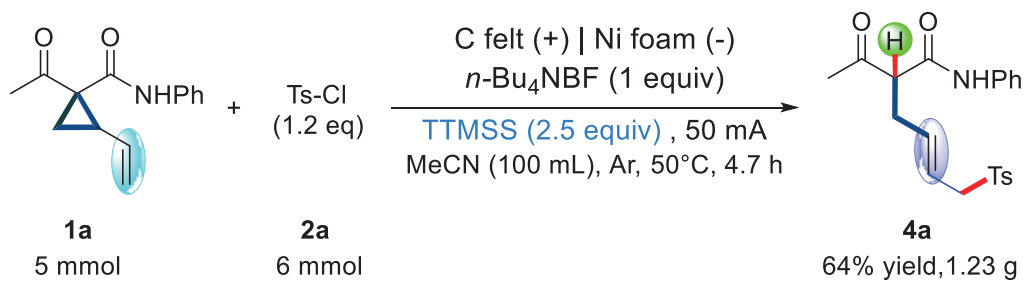

A custom-made undivided cell (Figure S2) equipped with a stir bar, a graphite felt anode (15 mm × 15 mm × 2 mm), and a nickel foam cathode (15 mm × 15 mm × 1.5 mm) was used. Under an argon atmosphere, vinylcyclopropane **1a** (5 mmol, 1.146 g), electrolyte  $n\text{-Bu}_4\text{NBF}_4$  (1.0 equiv, 5 mmol, 1.646 g), *p*-toluenesulfonyl chloride **2a** (1.2 equiv, 6 mmol, 1.144 g), and tris(trimethylsilyl)silane (TTMSS, 2.5 equiv, 12.5 mmol, 3.86 mL) were added to the cell. Finally, degassed acetonitrile (100 mL) was added. The mixture was electrolyzed with stirring using a constant current of 50.0 mA at 50°C (oil bath) for 4.7 hours. The residue obtained after evaporation of the solvent was purified by column chromatography on silica gel (petroleum ether–ethyl acetate) to afford product **4a** (1.23 g, 64% yield).

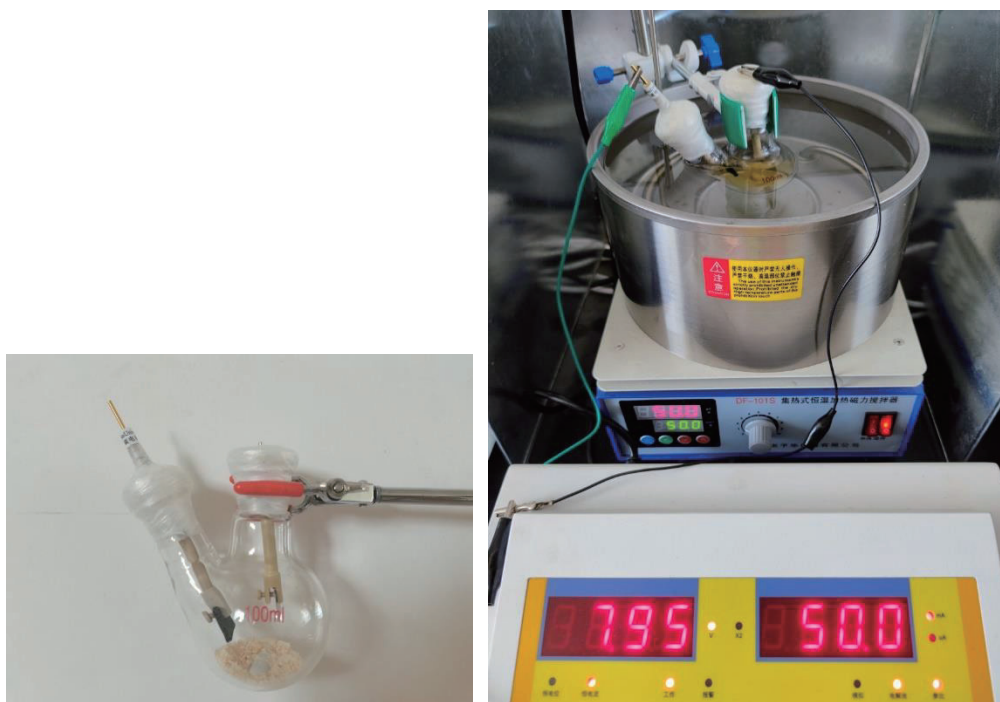

Figure S2 Setup for gram-scale synthesis

### 3. Transformations of the products

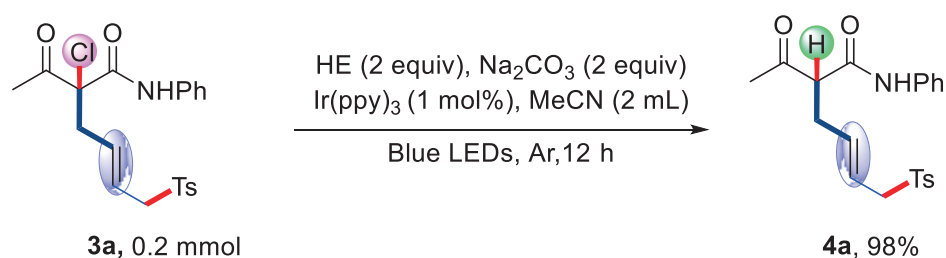

To a 10 mL reaction tube equipped with a magnetic stir bar, add **3a** (0.2 mmol, 0.0840 g), HE (Hantzsch ester, 2 equiv, 0.1023 g), Na<sub>2</sub>CO<sub>3</sub> (2 equiv, 0.0424 g), and Ir(ppy)<sub>3</sub> (1 mol%, 0.0013 g) under an argon atmosphere, along with 2 mL of acetonitrile. Illuminate the reaction with blue LEDs (6 W) for 12 hours. After the reaction was completed, add 10 mL of water to quench the reaction, and extract with 10 mL of dichloromethane (repeat three times). Evaporate the solvent and purify the residue by column chromatography (petroleum ether/ethyl acetate = 6:1, v/v) to obtain the desired product **4a** (76.3 mg, 98% yield).

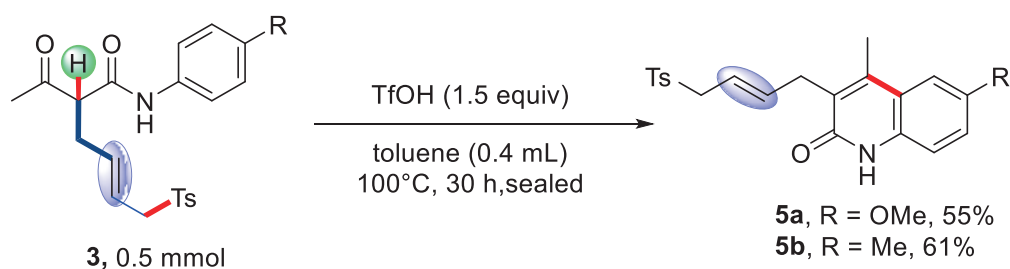

To a 10 mL pressure tube equipped with a magnetic stir bar, add substrate **4** (0.2 mmol), trifluoromethanesulfonic acid (1.5 equiv, 27  $\mu$ L), and toluene (0.4 mL). Seal the tube and heat at 100°C (oil bath) for 30 hours. After the reaction is complete, add 10 mL of sodium bicarbonate solution to quench the reaction, and extract with 10 mL of dichloromethane (repeat three times). Evaporate the solvent and purify the residue by column chromatography (petroleum ether/ethyl acetate/Et<sub>3</sub>N = 50:100:1 or petroleum ether/ethyl acetate/Et<sub>3</sub>N = 50:50:1, v/v/v) to obtain the desired product, **5a** (43.8 mg, 55% yield) or **5b** (66.3 mg, 61% yield).

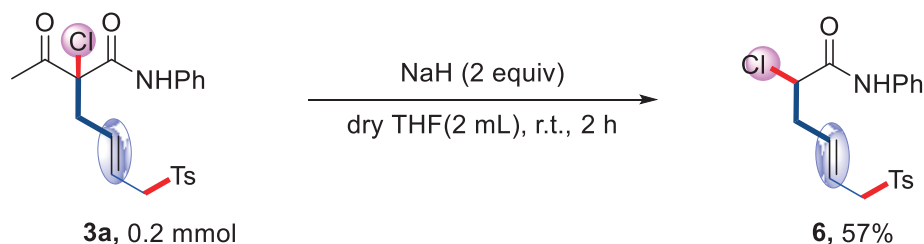

To a 10 mL reaction tube equipped with a magnetic stir bar, add substrate **3a** (0.2 mmol),

dry THF (0.4 mL), and NaH (2 equiv, 60% dispersion in mineral oil). Seal the tube and stir at room temperature for 2 hours. After the reaction is complete, add 5 mL of water to quench the reaction, and extract with 10 mL of dichloromethane (repeat three times). Evaporate the solvent and purify the residue by column chromatography (petroleum ether/ethyl acetate = 4:1, v/v) to obtain the desired product **6** (43.3 mg, 57% yield).

## IV. Mechanistic investigations

### 1. Quenching experiments

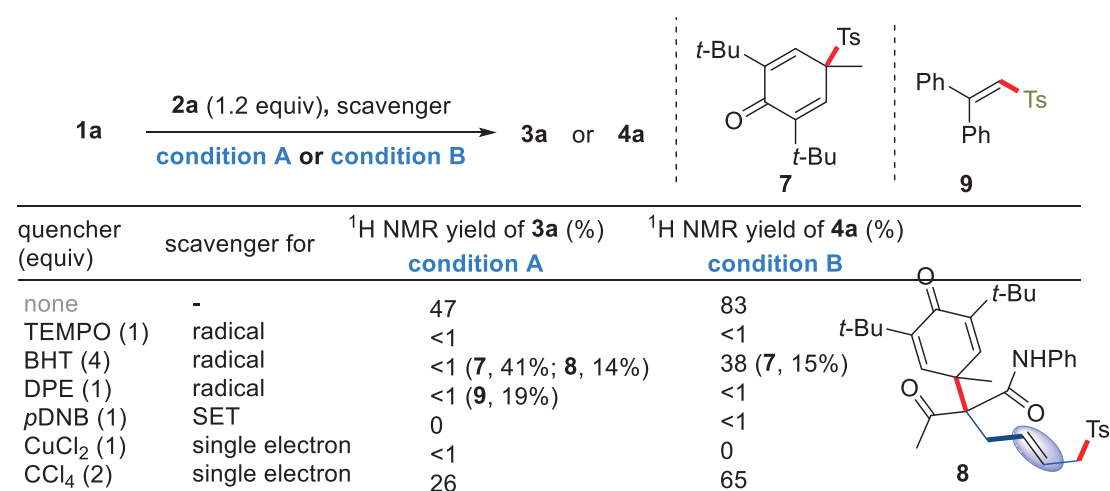

Condition A: A custom-made undivided cell (Figure S1) equipped with a stir bar, a graphite felt anode (15 mm × 15 mm × 2 mm), and a nickel foam cathode (15 mm × 15 mm × 1.5 mm) was used. Under an argon atmosphere, vinylcyclopropane **1** (0.5 mmol), electrolyte *n*-Bu<sub>4</sub>NBF<sub>4</sub> (1.0 equiv, 0.5 mmol, 0.1646 g), a **scavenger** (type and loading are shown in the table above), and sulfonyl chloride (1.2 equiv, 0.6 mmol) were added to the cell. If the sulfonyl chloride is solid, dissolve it in 2.0 mL of degassed acetonitrile before adding; if it is liquid, add it directly using a microsyringe. For **Condition B**, tris(trimethylsilyl)silane (TTMSS, 2.5 equiv, 1.25 mmol, 0.386 mL) was added at this moment. Finally, degassed acetonitrile was added, bringing the total solvent volume to 12.0 mL. The mixture was electrolyzed with stirring using a constant current of 10.0 mA at 50°C (oil bath) for 2.3 h (138 min). The yield was determined by <sup>1</sup>H NMR using 1,3,5-trimethoxybenzene as an internal standard.

### 2. Electricity on-off experiments

The reactions of **1a** and **2j1** (4-fluorobenzenesulfonyl chloride) were monitored for

detection purposes. Trifluorotoluene (1 equiv) was added to the reaction mixture as an internal standard before electrolysis. A 0.1 mL aliquot of the crude reaction solution was withdrawn at regular intervals using a syringe and subjected to  $^{19}\text{F}$  NMR analysis.

|           | A(X) | B(Y)                      |
|-----------|------|---------------------------|
| Long Name | time | $^{19}\text{F}$ NMR yield |
| Units     | min  | %                         |
| Comments  |      |                           |
| F(x)=     |      | Electricity on/off        |
| 1         | 0    | 0                         |
| 2         | 20   | 10                        |
| 3         | 40   | 12                        |
| 4         | 60   | 31                        |
| 5         | 80   | 34                        |
| 6         | 100  | 43                        |
| 7         | 120  | 44                        |
| 8         | 140  | 56                        |
| 9         | 160  | 56                        |

**Figure S3** Electricity on-off experiments of condition A

|           | A(X) | B(Y)                      |
|-----------|------|---------------------------|
| Long Name | time | $^{19}\text{F}$ NMR Yield |
| Units     | min  | %                         |
| Comments  |      |                           |
| F(x)=     |      | Electricity on/off        |
| 1         | 0    | 0                         |
| 2         | 20   | 59                        |
| 3         | 40   | 60                        |
| 4         | 60   | 70                        |
| 5         | 80   | 72                        |
| 6         | 100  | 81                        |
| 7         | 120  | 81                        |
| 8         | 140  | 89                        |
| 9         | 160  | 90                        |

**Figure S4** Electricity on-off experiments of condition B

#### 4. Reaction kinetic profiles

Benzotrifluoride (1 equiv) was added as an internal standard to the reaction mixture before electrolysis using 4-(Trifluoromethyl)benzenesulfonyl chloride as the radical precursor. 0.05 mL of the crude reaction solution was taken out each time via a syringe and was subjected to  $^{19}\text{F}$  NMR analysis.

|           | A(X) | B(Y)                      |
|-----------|------|---------------------------|
| Long Name | time | <sup>19</sup> F NMR Yield |
| Units     | min  | %                         |
| Comments  |      |                           |
| F(x)=     |      |                           |
| 1         | 0    | 0                         |
| 2         | 20   | 3                         |
| 3         | 40   | 6                         |
| 4         | 60   | 13                        |
| 5         | 80   | 18                        |
| 6         | 100  | 24                        |
| 7         | 120  | 26                        |
| 8         | 140  | 32                        |
| 9         | 160  | 31                        |

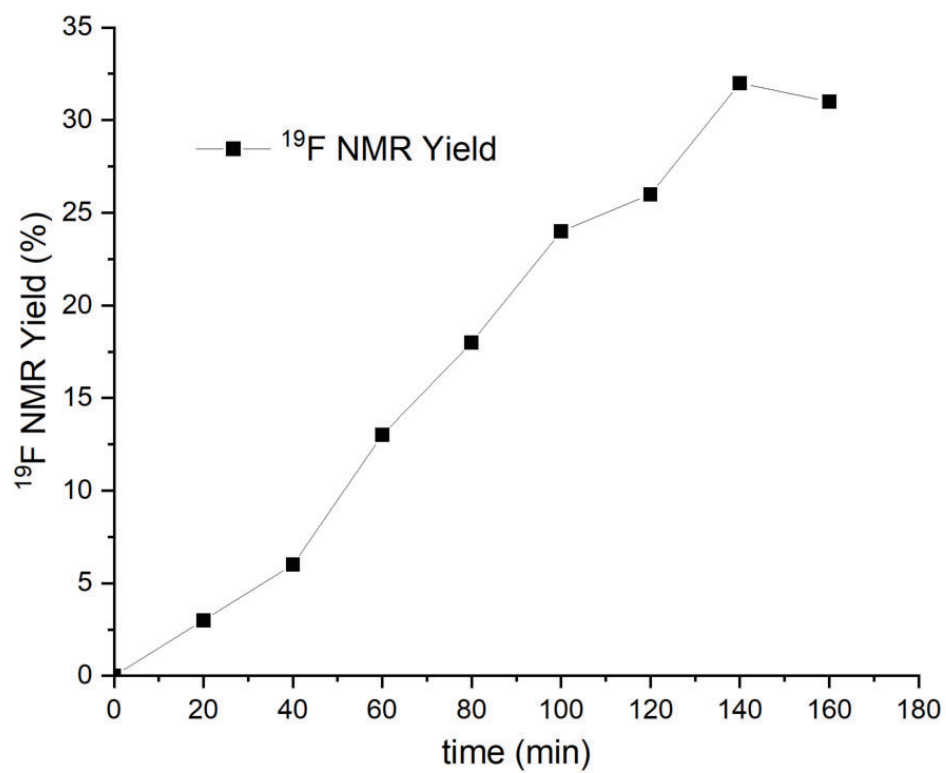

**Figure S5** Reaction kinetic profiles of condition A

|           | A(X) | B(Y)                      |
|-----------|------|---------------------------|
| Long Name | time | <sup>19</sup> F NMR Yield |
| Units     | min  | %                         |
| Comments  |      |                           |
| F(x)=     |      |                           |
| 1         | 0    | 0                         |
| 2         | 20   | 73                        |
| 3         | 40   | 86                        |
| 4         | 60   | 87                        |
| 5         | 80   | 89                        |
| 6         | 100  | 91                        |
| 7         | 120  | 94                        |
| 8         | 140  | 95                        |
| 9         | 160  | 96                        |
| 10        | 180  | 96                        |
| 11        | 200  | 95                        |

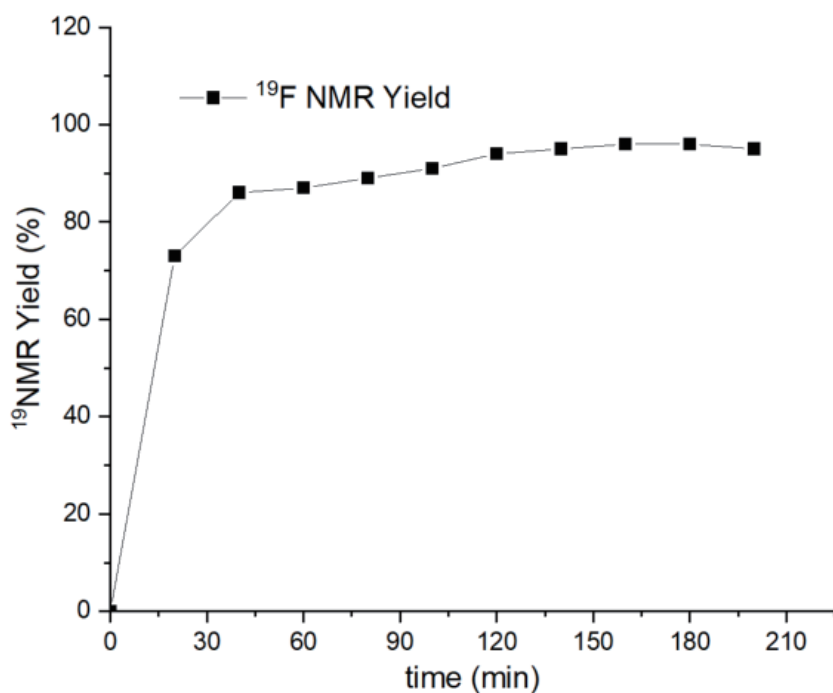

Figure S6 Reaction kinetic profiles of condition B

## 5. Cyclic voltammetry studies

**General procedure:** Cyclic voltammetries were performed in a three-electrode cell at room temperature. The working electrode was a glassy carbon (GC,  $d = 3$  mm) disk electrode, and the counter electrode was a platinum wire. The reference was an Ag/AgCl electrode submerged in a saturated aqueous KCl solution, and separated from

reactions by a salt bridge. 10 mL MeCN solution containing 1.0 mmol  $n\text{-Bu}_4\text{NBF}_4$  was poured into the electrochemical cell in all experiments. The scan rate was 0.05 V/s.

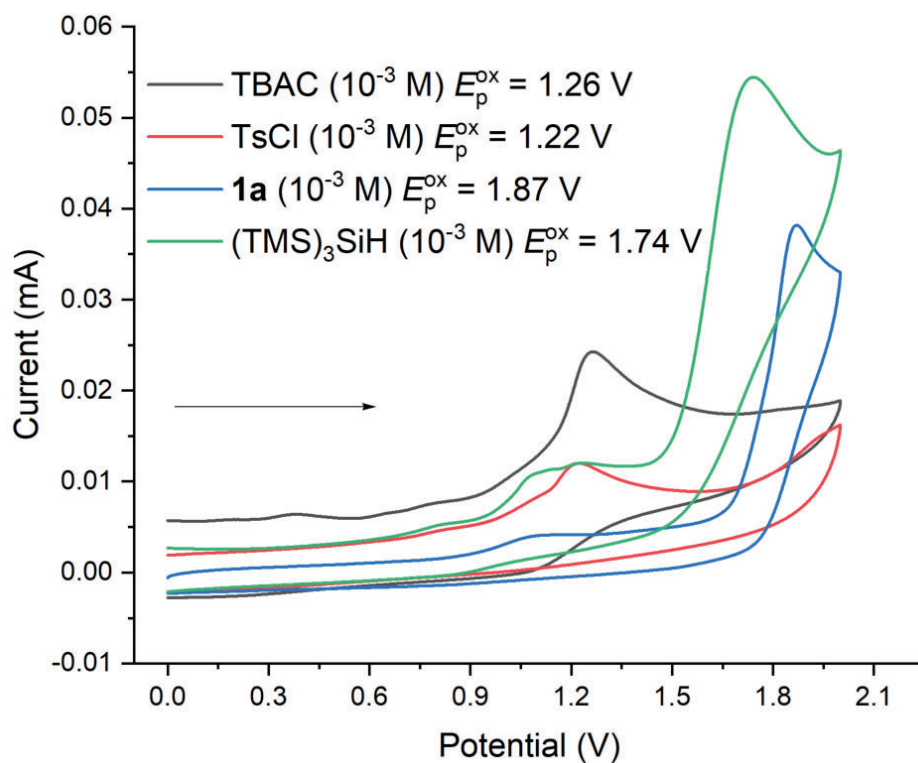

**Figure S7** Anodic cyclic voltammograms of TBAC, TsCl, **1a**, or  $(\text{TMS})_3\text{SiH}$  in MeCN

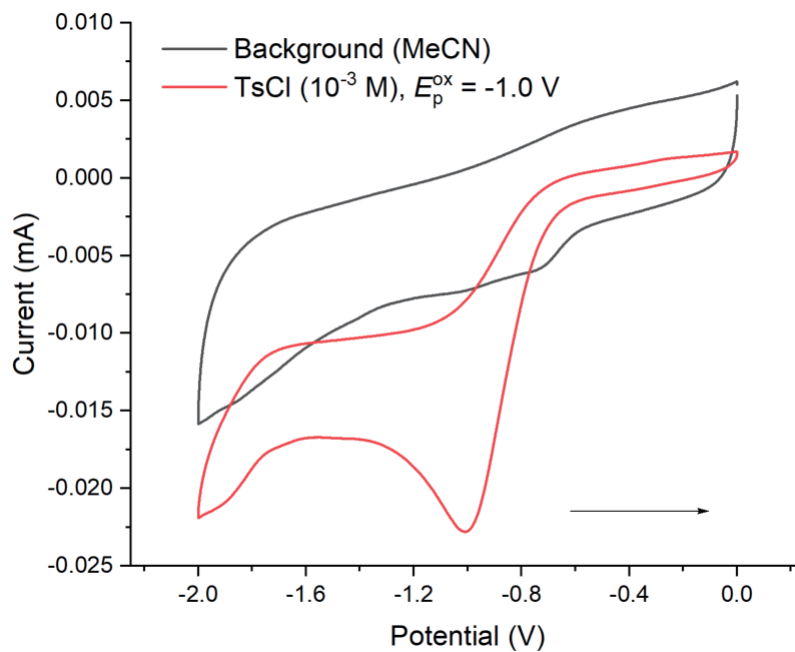

**Figure S8** Cathode cyclic voltammograms of TsCl in MeCN



## V. Spectral data of products

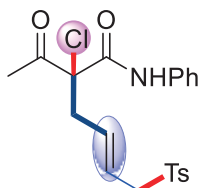

(*E*)-2-Acetyl-2-chloro-*N*-phenyl-6-tosylhex-4-enamide (**3a**). Isolated by flash column chromatography (petroleum ether/ethyl acetate = 7:1, v/v) in 47% yield (99.5 mg), *E/Z* = 25:1, which was detected by <sup>1</sup>H NMR spectroscopy. Yellow oil, *R<sub>f</sub>* (petroleum ether/ethyl acetate = 3:1, v/v) 0.33. <sup>1</sup>H NMR (400 MHz, CDCl<sub>3</sub>) δ 8.44 (s, 1H), 7.60 (d, *J* = 8.2 Hz, 2H), 7.50 (d, *J* = 8.4 Hz, 2H), 7.28 (dd, *J* = 11.0, 4.8 Hz, 2H), 7.21 (d, *J* = 8.0 Hz, 2H), 7.11 (t, *J* = 7.4 Hz, 1H), 5.53 (tdd, *J* = 22.2, 14.9, 7.1 Hz, 2H), 3.65 (qd, *J* = 13.9, 7.1 Hz, 2H), 2.99 (dd, *J* = 14.8, 6.4 Hz, 1H), 2.75 (dd, *J* = 14.8, 7.8 Hz, 1H), 2.34 (s, 3H), 2.25 (s, 3H). <sup>13</sup>C NMR (101 MHz, CDCl<sub>3</sub>) δ 196.41, 164.49, 144.88, 136.39, 135.70, 133.30, 129.83, 129.19, 128.32, 125.68, 122.51, 120.37, 75.41, 59.93, 39.43, 25.16, 21.66. HRMS (ESI-TOF) Calcd for C<sub>21</sub>H<sub>23</sub>ClNO<sub>4</sub>S<sup>+</sup> ([M+H]<sup>+</sup>) 420.1031. Found 420.1033.

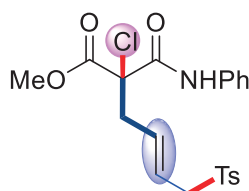

Methyl (*E*)-2-chloro-2-(phenylcarbamoyl)-6-tosylhex-4-enoate (**3a1**). Isolated by flash column chromatography (petroleum ether/ethyl acetate = 2:1, v/v) in 25% yield (51.4 mg), *E/Z* > 20:1, which was detected by <sup>1</sup>H NMR spectroscopy. Brown yellow oil, *R<sub>f</sub>* (petroleum ether/ethyl acetate = 1:1, v/v) 0.33. <sup>1</sup>H NMR (400 MHz, CDCl<sub>3</sub>) δ 8.45 (s, 1H), 7.74 – 7.64 (m, 2H), 7.55 (dd, *J* = 8.6, 1.0 Hz, 2H), 7.40 – 7.34 (m, 2H), 7.30 (d, *J* = 7.9 Hz, 2H), 7.22 – 7.15 (m, 1H), 5.68 – 5.55 (m, 2H), 3.83 (s, 3H), 3.78 – 3.69 (m, 2H), 3.25 – 3.15 (m, 1H), 2.99 (ddd, *J* = 14.8, 4.6, 2.2 Hz, 1H), 2.42 (s, 3H). <sup>13</sup>C NMR (101 MHz, CDCl<sub>3</sub>) δ 167.35, 163.37, 144.84, 136.49, 135.51, 132.70, 129.79, 129.15, 128.39, 125.55, 122.91, 120.27, 70.47, 59.92, 54.10, 40.58, 21.66. HRMS (ESI-TOF) Calcd for C<sub>21</sub>H<sub>23</sub>ClNO<sub>5</sub>S<sup>+</sup> ([M+H]<sup>+</sup>) 436.0980. Found 436.0981.

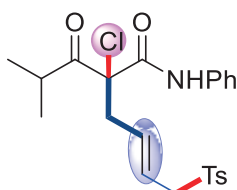

(*E*)-2-Chloro-2-isobutyryl-*N*-phenyl-6-tosylhex-4-enamide (**3a2**). Isolated by flash column chromatography (petroleum ether/ethyl acetate = 7:1, v/v) in 45% yield (101.6 mg), *E/Z* > 20:1, which was detected by <sup>1</sup>H NMR spectroscopy. Pale yellow oil, *R<sub>f</sub>* (petroleum ether/ethyl acetate = 3:1, v/v) 0.33. <sup>1</sup>H NMR (400 MHz, CDCl<sub>3</sub>) δ 8.42 (s, 1H), 7.70 (d, *J* = 8.3 Hz, 2H), 7.46 (d, *J* = 8.4 Hz, 2H), 7.31 (d, *J* = 8.1 Hz, 2H), 7.17 (d, *J* = 8.3 Hz, 2H), 5.75 – 5.47 (m, 2H), 3.74 (qd, *J* = 13.9, 7.1 Hz, 2H), 3.08 (dd, *J* = 14.7, 6.3 Hz, 1H), 2.83 (dd, *J* = 14.7, 7.7 Hz, 1H), 2.43 (s, 3H), 2.34 (s, 3H), 2.33 (s, 3H). <sup>13</sup>C NMR (101 MHz, CDCl<sub>3</sub>) δ 196.44, 164.30, 144.86, 135.70, 135.49, 133.81, 133.33, 129.82, 129.67, 128.35, 122.45, 120.36, 75.41, 59.95, 39.43, 25.11, 21.65, 20.95. HRMS (ESI-TOF) Calcd for C<sub>23</sub>H<sub>27</sub>ClNO<sub>4</sub>S<sup>+</sup> ([M+H]<sup>+</sup>) 448.1344. Found 448.1344.

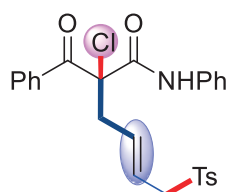

(*E*)-2-Benzoyl-2-chloro-*N*-phenyl-6-tosylhex-4-enamide (**3a3**). Isolated by flash column chromatography (petroleum ether/ethyl acetate = 6:1, v/v) in 35% yield (83.7 mg), *E/Z* = 13:1, which was detected by <sup>1</sup>H NMR spectroscopy. Yellow oil, *R<sub>f</sub>* (petroleum ether/ethyl acetate = 3:1, v/v) 0.33. <sup>1</sup>H NMR (400 MHz, CDCl<sub>3</sub>) δ 8.66 (s, 1H), 8.07 – 7.96 (m, 2H), 7.76 – 7.70 (m, 2H), 7.65 – 7.58 (m, 2H), 7.58 – 7.51 (m, 1H), 7.44 – 7.35 (m, 4H), 7.32 (d, *J* = 7.9 Hz, 2H), 7.24 – 7.17 (m, 1H), 5.81 (ddd, *J* = 8.5, 8.1, 6.7 Hz, 1H), 5.60 (ddd, *J* = 15.2, 8.4, 6.5 Hz, 1H), 3.83 (dd, *J* = 13.6, 6.4 Hz, 1H), 3.73 (dd, *J* = 13.8, 8.5 Hz, 1H), 3.23 (dd, *J* = 14.5, 6.6 Hz, 1H), 3.04 (dd, *J* = 14.9, 8.5 Hz, 1H), 2.43 (s, 3H). <sup>13</sup>C NMR (101 MHz, CDCl<sub>3</sub>) δ 189.34, 165.44, 144.95, 136.48, 135.85, 133.56, 133.49, 133.23, 129.89, 129.47, 129.22, 128.58, 128.32, 125.60, 122.76, 120.43, 72.13, 60.06, 41.14, 21.68. HRMS (ESI-TOF) Calcd for C<sub>26</sub>H<sub>25</sub>ClNO<sub>4</sub>S<sup>+</sup> ([M+H]<sup>+</sup>) 482.1187. Found 482.1188.

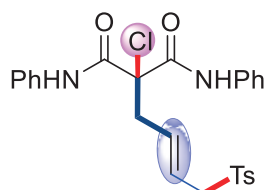

(*E*)-2-Chloro-*N*<sup>1</sup>,*N*<sup>3</sup>-diphenyl-2-(4-tosylbut-2-en-1-yl)malonamide (**3a4**). Isolated by flash column chromatography (petroleum ether/ethyl acetate = 6:1, v/v) in 31% yield (78.1 mg), *E/Z* > 20:1, which was detected by <sup>1</sup>H NMR spectroscopy. Brown solid, m.p. = 120.4-121.3 °C. *R<sub>f</sub>* (petroleum ether/ethyl acetate = 4:1, v/v) 0.33. <sup>1</sup>H NMR (400 MHz,

CDCl<sub>3</sub>)  $\delta$  9.01 (s, 2H), 7.70 (d,  $J$  = 8.1 Hz, 2H), 7.55 (d,  $J$  = 7.9 Hz, 4H), 7.37 (t,  $J$  = 7.8 Hz, 4H), 7.30 (d,  $J$  = 8.0 Hz, 2H), 7.19 (t,  $J$  = 7.4 Hz, 2H), 5.66 (q,  $J$  = 6.2 Hz, 2H), 3.76 (d,  $J$  = 6.0 Hz, 2H), 3.17 (d,  $J$  = 5.8 Hz, 2H), 2.42 (s, 3H). <sup>13</sup>C NMR (101 MHz, CDCl<sub>3</sub>)  $\delta$  164.30, 144.90, 136.49, 135.56, 132.45, 129.83, 129.20, 128.36, 125.64, 123.21, 120.52, 76.12, 59.87, 44.14, 21.66. HRMS (ESI-TOF) Calcd for C<sub>26</sub>H<sub>26</sub>ClN<sub>2</sub>O<sub>4</sub>S<sup>+</sup> ([M+H]<sup>+</sup>) 497.1296. Found 497.1299.

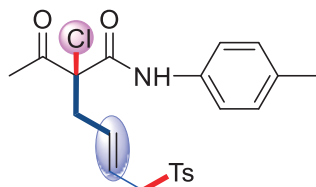

(*E*)-2-Acetyl-2-chloro-*N*-(*p*-tolyl)-6-tosylhex-4-enamide (**3b1**). Isolated by flash column chromatography (petroleum ether/ethyl acetate = 9:1, v/v) in 38% yield (82.2 mg), *E/Z* = 17:1, which was detected by <sup>1</sup>H NMR spectroscopy. Brown oil, *R<sub>f</sub>* (petroleum ether/ethyl acetate = 4:1, v/v) 0.33. <sup>1</sup>H NMR (400 MHz, CDCl<sub>3</sub>)  $\delta$  8.42 (s, 1H), 7.70 (d,  $J$  = 8.3 Hz, 2H), 7.46 (d,  $J$  = 8.4 Hz, 2H), 7.31 (d,  $J$  = 8.1 Hz, 2H), 7.17 (d,  $J$  = 8.3 Hz, 2H), 5.73 – 5.50 (m, 2H), 3.74 (qd,  $J$  = 13.9, 7.1 Hz, 2H), 3.08 (dd,  $J$  = 14.7, 6.3 Hz, 1H), 2.83 (dd,  $J$  = 14.7, 7.7 Hz, 1H), 2.43 (s, 3H), 2.34 (s, 3H), 2.33 (s, 3H). <sup>13</sup>C NMR (101 MHz, CDCl<sub>3</sub>)  $\delta$  196.44, 164.30, 144.86, 135.70, 135.49, 133.81, 133.33, 129.82, 129.67, 128.35, 122.45, 120.36, 75.41, 59.95, 39.43, 25.11, 21.65, 20.95. HRMS (ESI-TOF) Calcd for C<sub>22</sub>H<sub>25</sub>ClNO<sub>4</sub>S<sup>+</sup> ([M+H]<sup>+</sup>) 434.1187. Found 434.1190.

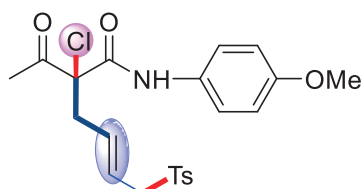

(*E*)-2-Acetyl-2-chloro-*N*-(4-methoxyphenyl)-6-tosylhex-4-enamide (**3b2**). Isolated by flash column chromatography (petroleum ether/ethyl acetate = 7:1, v/v) in 36% yield (80.5 mg), *E/Z* > 20:1, which was detected by <sup>1</sup>H NMR spectroscopy. Brown oil, *R<sub>f</sub>* (petroleum ether/ethyl acetate = 3:1, v/v) 0.33. <sup>1</sup>H NMR (400 MHz, CDCl<sub>3</sub>)  $\delta$  8.40 (s, 1H), 7.70 (d,  $J$  = 8.3 Hz, 2H), 7.49 (d,  $J$  = 9.0 Hz, 2H), 7.31 (d,  $J$  = 8.0 Hz, 2H), 6.90 (d,  $J$  = 9.0 Hz, 2H), 5.74 – 5.49 (m, 2H), 3.81 (s, 3H), 3.79 – 3.67 (m, 2H), 3.08 (dd,  $J$  = 14.7, 6.5 Hz, 1H), 2.83 (dd,  $J$  = 14.7, 7.8 Hz, 1H), 2.43 (s, 3H), 2.34 (s, 3H). <sup>13</sup>C NMR (101 MHz, CDCl<sub>3</sub>)  $\delta$  196.47, 164.26, 157.36, 144.88, 135.72, 133.42, 129.83, 129.40, 128.34, 122.39, 122.16, 114.29, 75.37, 59.96, 55.53, 39.39, 25.10, 21.65. HRMS (ESI-TOF) Calcd for C<sub>22</sub>H<sub>25</sub>ClNO<sub>5</sub>S<sup>+</sup> ([M+H]<sup>+</sup>) 450.1136. Found 450.1136.

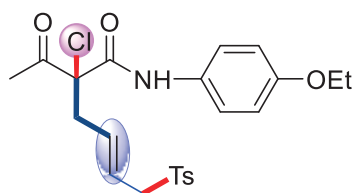

(*E*)-2-Acetyl-2-chloro-*N*-(4-ethoxyphenyl)-6-tosylhex-4-enamide (**3b3**). Isolated by flash column chromatography (petroleum ether/ethyl acetate = 7:1, v/v) in 40% yield (93.1 mg), *E/Z* > 20:1, which was detected by  $^1\text{H}$  NMR spectroscopy. Brown oil,  $R_f$  (petroleum ether/ethyl acetate = 3:1, v/v) 0.33.  $^1\text{H}$  NMR (400 MHz,  $\text{CDCl}_3$ )  $\delta$  8.39 (s, 1H), 7.70 (d,  $J = 8.3$  Hz, 2H), 7.47 (d,  $J = 9.0$  Hz, 2H), 7.31 (d,  $J = 8.0$  Hz, 2H), 6.89 (d,  $J = 9.0$  Hz, 2H), 5.78 – 5.45 (m, 2H), 4.03 (q,  $J = 7.0$  Hz, 2H), 3.75 (qd,  $J = 13.9$ , 7.2 Hz, 2H), 3.08 (dd,  $J = 14.8$ , 6.4 Hz, 1H), 2.83 (dd,  $J = 14.7$ , 7.8 Hz, 1H), 2.43 (s, 3H), 2.34 (s, 3H), 1.41 (t,  $J = 7.0$  Hz, 3H).  $^{13}\text{C}$  NMR (101 MHz,  $\text{CDCl}_3$ )  $\delta$  196.50, 164.22, 156.71, 144.89, 135.66, 133.43, 129.84, 129.24, 128.35, 122.40, 122.12, 114.85, 75.35, 63.75, 59.96, 39.38, 25.12, 21.68, 14.82. HRMS (ESI-TOF) Calcd for  $\text{C}_{23}\text{H}_{27}\text{ClNO}_5\text{S}^+$  ( $[\text{M}+\text{H}]^+$ ) 464.1293. Found 464.1294.

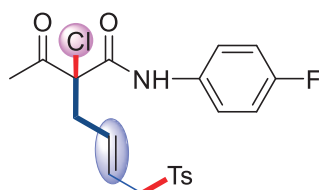

(*E*)-2-Acetyl-2-chloro-*N*-(4-fluorophenyl)-6-tosylhex-4-enamide (**3b4**). Isolated by flash column chromatography (petroleum ether/ethyl acetate = 7:1, v/v) in 42% yield (93.0 mg), *E/Z* > 20:1, which was detected by  $^1\text{H}$  NMR spectroscopy. Yellow oil,  $R_f$  (petroleum ether/ethyl acetate = 3:1, v/v) 0.33.  $^1\text{H}$  NMR (400 MHz,  $\text{CDCl}_3$ )  $\delta$  8.52 (s, 1H), 7.70 (d,  $J = 8.3$  Hz, 2H), 7.63 – 7.55 (m, 2H), 7.32 (d,  $J = 8.1$  Hz, 2H), 7.10 – 7.02 (m, 2H), 5.71 (ddd,  $J = 14.9$ , 7.7, 7.0 Hz, 1H), 5.63 – 5.46 (m, 1H), 3.74 (ddd,  $J = 21.7$ , 13.8, 7.3 Hz, 2H), 3.09 (dd,  $J = 14.6$ , 6.6 Hz, 1H), 2.94 – 2.77 (m, 1H), 2.44 (s, 3H), 2.35 (s, 3H).  $^{13}\text{C}$  NMR (101 MHz,  $\text{CDCl}_3$ )  $\delta$  196.36, 164.61, 164.01 (d,  $J = 246.2$  Hz), 144.97, 135.79, 133.47, 132.42 (d,  $J = 3.0$  Hz), 129.88, 128.26, 122.44, 122.35 (d,  $J = 8.1$  Hz), 115.91 (d,  $J = 22.8$  Hz), 75.32, 59.93, 39.32, 25.19, 21.67.  $^{19}\text{F}$  NMR (376 MHz,  $\text{CDCl}_3$ )  $\delta$  -116.02. HRMS (ESI-TOF) Calcd for  $\text{C}_{21}\text{H}_{22}\text{ClFNO}_4\text{S}^+$  ( $[\text{M}+\text{H}]^+$ ) 438.0937. Found 438.0938.

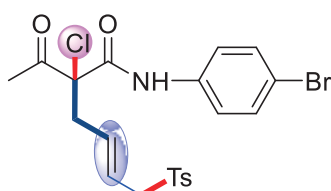

(*E*)-2-Acetyl-*N*-(4-bromophenyl)-2-chloro-6-tosylhex-4-enamide (**3b5**). Isolated by flash column chromatography (petroleum ether/ethyl acetate = 7:1, v/v) in 48% yield (120.0 mg), *E/Z* = 17:1, which was detected by <sup>1</sup>H NMR spectroscopy. Pale yellow oil, *R<sub>f</sub>* (petroleum ether/ethyl acetate = 3:1, v/v) 0.33. <sup>1</sup>H NMR (400 MHz, CDCl<sub>3</sub>) δ 8.53 (s, 1H), 7.70 (d, *J* = 8.3 Hz, 2H), 7.56 – 7.51 (m, 2H), 7.51 – 7.46 (m, 2H), 7.32 (d, *J* = 7.9 Hz, 2H), 5.75 – 5.64 (m, 1H), 5.64 – 5.49 (m, 1H), 3.78 (dd, *J* = 13.7, 6.5 Hz, 1H), 3.69 (dd, *J* = 13.8, 7.9 Hz, 1H), 3.08 (dd, *J* = 14.6, 6.6 Hz, 1H), 2.83 (dd, *J* = 14.7, 8.0 Hz, 1H), 2.44 (s, 3H), 2.35 (s, 3H). <sup>13</sup>C NMR (101 MHz, CDCl<sub>3</sub>) δ 196.26, 164.68, 144.97, 135.86, 135.54, 133.42, 132.14, 129.89, 128.23, 122.49, 121.96, 118.44, 75.36, 59.92, 39.34, 25.22, 21.67. HRMS (ESI-TOF) Calcd for C<sub>21</sub>H<sub>22</sub>BrClNO<sub>4</sub>S<sup>+</sup> ([M+H]<sup>+</sup>) 498.0136. Found 498.0138.

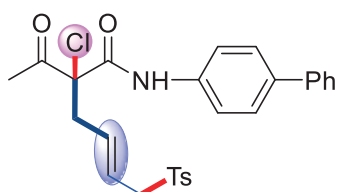

(*E*)-*N*-([1,1'-Biphenyl]-4-yl)-2-acetyl-2-chloro-6-tosylhex-4-enamide (**3b6**). Isolated by flash column chromatography (petroleum ether/ethyl acetate = 7:1, v/v) in 29% yield (70.9 mg), *E/Z* = 17:1, which was detected by <sup>1</sup>H NMR spectroscopy. Yellow oil, *R<sub>f</sub>* (petroleum ether/ethyl acetate = 3:1, v/v) 0.33. <sup>1</sup>H NMR (400 MHz, CDCl<sub>3</sub>) δ 8.55 (s, 1H), 7.74 – 7.65 (m, 4H), 7.64 – 7.54 (m, 4H), 7.48 – 7.41 (m, 2H), 7.36 (dt, *J* = 9.3, 4.3 Hz, 1H), 7.32 (t, *J* = 5.4 Hz, 2H), 5.76 – 5.65 (m, 1H), 5.65 – 5.52 (m, 1H), 3.75 (qd, *J* = 13.8, 7.2 Hz, 2H), 3.11 (dd, *J* = 14.7, 6.5 Hz, 1H), 2.86 (dd, *J* = 14.8, 7.9 Hz, 1H), 2.43 (s, 3H), 2.37 (s, 3H). <sup>13</sup>C NMR (101 MHz, CDCl<sub>3</sub>) δ 196.38, 164.53, 144.90, 140.21, 138.59, 135.79, 135.65, 133.38, 129.85, 128.88, 128.32, 127.78, 127.43, 126.94, 122.53, 120.63, 75.45, 59.96, 39.43, 25.19, 21.66. HRMS (ESI-TOF) Calcd for C<sub>27</sub>H<sub>27</sub>ClNO<sub>4</sub>S<sup>+</sup> ([M+H]<sup>+</sup>) 496.1344. Found 496.1345.

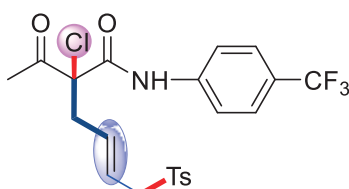

(*E*)-2-Acetyl-2-chloro-6-tosyl-*N*-(4-(trifluoromethyl)phenyl)hex-4-enamide (**3b7**). Isolated by flash column chromatography (petroleum ether/ethyl acetate = 6:1, v/v) in 40% yield (97.6 mg), *E/Z* > 20:1, which was detected by <sup>1</sup>H NMR spectroscopy. Pale yellow oil, *R<sub>f</sub>* (petroleum ether/ethyl acetate = 2.5:1, v/v) 0.33. <sup>1</sup>H NMR (400 MHz, CDCl<sub>3</sub>) δ 8.69 (s, 1H), 7.79 (d, *J* = 8.5 Hz, 2H), 7.70 (d, *J* = 8.3 Hz, 2H), 7.64 (d, *J* =

8.6 Hz, 2H), 7.33 (d,  $J = 8.1$  Hz, 2H), 5.80 – 5.67 (m, 1H), 5.67 – 5.53 (m, 1H), 3.78 (dd,  $J = 13.6, 6.5$  Hz, 1H), 3.69 (dd,  $J = 13.7, 8.1$  Hz, 1H), 3.11 (dd,  $J = 14.6, 6.5$  Hz, 1H), 2.85 (dd,  $J = 14.7, 8.2$  Hz, 1H), 2.44 (s, 3H), 2.36 (s, 3H).  $^{13}\text{C}$  NMR (101 MHz,  $\text{CDCl}_3$ )  $\delta$  196.15, 165.08, 145.02, 139.51, 135.93, 133.43, 129.91, 128.17, 127.30 (q,  $J = 32.9$  Hz), 126.37 (q,  $J = 3.7$  Hz), 125.70 (q,  $J = 272.4$  Hz), 122.57, 120.13, 75.34, 59.91, 39.33, 25.26, 21.65.  $^{19}\text{F}$  NMR (376 MHz,  $\text{CDCl}_3$ )  $\delta$  -62.30. HRMS (ESI-TOF) Calcd for  $\text{C}_{22}\text{H}_{22}\text{ClF}_3\text{NO}_4\text{S}^+$  ( $[\text{M}+\text{H}]^+$ ) 488.0905. Found 488.0908.

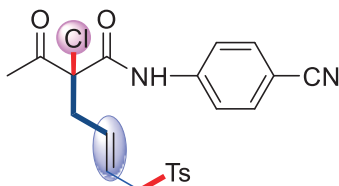

(*E*)-2-Acetyl-2-chloro-*N*-(4-cyanophenyl)-6-tosylhex-4-enamide (**3b8**). Isolated by flash column chromatography (petroleum ether/ethyl acetate = 7:1, v/v) in 36% yield (80.7 mg), *E/Z* > 20:1, which was detected by  $^1\text{H}$  NMR spectroscopy. Yellow oil,  $R_f$  (petroleum ether/ethyl acetate = 3:1, v/v) 0.33.  $^1\text{H}$  NMR (400 MHz,  $\text{CDCl}_3$ )  $\delta$  8.75 (s, 1H), 7.92 – 7.78 (m, 2H), 7.71 (d,  $J = 8.3$  Hz, 2H), 7.69 – 7.63 (m, 2H), 7.34 (d,  $J = 8.0$  Hz, 2H), 5.90 – 5.69 (m, 1H), 5.69 – 5.48 (m, 1H), 3.78 (dd,  $J = 13.5, 6.5$  Hz, 1H), 3.68 (dd,  $J = 13.6, 8.2$  Hz, 1H), 3.10 (dd,  $J = 14.6, 6.7$  Hz, 1H), 2.85 (dd,  $J = 14.6, 8.3$  Hz, 1H), 2.45 (s, 3H), 2.37 (s, 3H).  $^{13}\text{C}$  NMR (101 MHz,  $\text{CDCl}_3$ )  $\delta$  196.04, 165.31, 145.11, 140.47, 136.00, 133.51, 133.27, 129.97, 128.11, 122.59, 120.42, 118.54, 108.64, 75.29, 59.89, 39.26, 25.34, 21.68. HRMS (ESI-TOF) Calcd for  $\text{C}_{22}\text{H}_{22}\text{ClN}_2\text{O}_4\text{S}^+$  ( $[\text{M}+\text{H}]^+$ ) 445.0983. Found 445.0984.

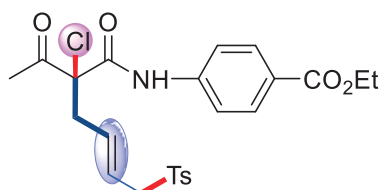

Ethyl (*E*)-4-(2-acetyl-2-chloro-6-tosylhex-4-enamido)benzoate (**3b9**). Isolated by flash column chromatography (petroleum ether/ethyl acetate = 5:1, v/v) in 38% yield (93.1 mg), *E/Z* > 20:1, which was detected by  $^1\text{H}$  NMR spectroscopy. Yellow oil,  $R_f$  (petroleum ether/ethyl acetate = 2:1, v/v) 0.33.  $^1\text{H}$  NMR (400 MHz,  $\text{CDCl}_3$ )  $\delta$  8.66 (s, 1H), 8.12 – 7.98 (m, 2H), 7.77 – 7.65 (m, 4H), 7.32 (d,  $J = 8.0$  Hz, 2H), 5.80 – 5.65 (m, 1H), 5.64 – 5.50 (m, 1H), 4.38 (q,  $J = 7.1$  Hz, 2H), 3.73 (ddd,  $J = 21.7, 13.7, 7.2$  Hz, 2H), 3.10 (dd,  $J = 14.7, 6.5$  Hz, 1H), 2.86 (dd,  $J = 14.7, 8.0$  Hz, 1H), 2.44 (s, 3H), 2.36 (s, 3H), 1.40 (t,  $J = 7.1$  Hz, 3H).  $^{13}\text{C}$  NMR (101 MHz,  $\text{CDCl}_3$ )  $\delta$  196.23, 165.88, 164.87, 144.96, 140.38, 135.85, 133.32, 130.80, 129.89, 128.23, 127.34, 122.60, 119.53, 75.43,

61.06, 59.91, 39.43, 25.28, 21.66, 14.35. HRMS (ESI-TOF) Calcd for  $C_{24}H_{27}ClNO_6S^+$  ( $[M+H]^+$ ) 492.1242. Found 492.1240.

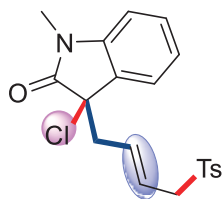

(*E*)-3-Chloro-1-methyl-3-(4-tosylbut-2-en-1-yl)indolin-2-one (**3c**). Isolated by flash column chromatography (petroleum ether/ethyl acetate = 2:1, v/v) in 21% yield (39.7 mg), *E/Z* > 20:1, which was detected by  $^1H$  NMR spectroscopy. Brown yellow oil,  $R_f$  (petroleum ether/ethyl acetate = 1:1, v/v) 0.33.  $^1H$  NMR (400 MHz,  $CDCl_3$ )  $\delta$  7.59 (d,  $J = 8.3$  Hz, 2H), 7.32 (d,  $J = 8.0$  Hz, 2H), 7.02 (ddd,  $J = 13.3, 9.9, 4.3$  Hz, 2H), 6.90 – 6.74 (m, 1H), 6.44 (d,  $J = 7.7$  Hz, 1H), 5.26 (dt,  $J = 15.0, 7.4$  Hz, 1H), 4.93 (dt,  $J = 15.1, 7.5$  Hz, 1H), 3.58 (dd,  $J = 13.4, 6.3$  Hz, 1H), 3.40 (d,  $J = 7.4$  Hz, 2H), 3.08 (s, 3H), 2.94 (dd,  $J = 13.4, 8.3$  Hz, 1H), 2.45 (s, 3H).  $^{13}C$  NMR (101 MHz,  $CDCl_3$ )  $\delta$  176.38, 144.54, 143.35, 135.80, 134.97, 129.72, 128.54, 128.38, 127.39, 123.00, 121.80, 120.44, 107.80, 59.77, 55.57, 32.14, 25.82, 21.65. HRMS (ESI-TOF) Calcd for  $C_{20}H_{21}ClNO_3S^+$  ( $[M+H]^+$ ) 390.0925. Found 390.0922.

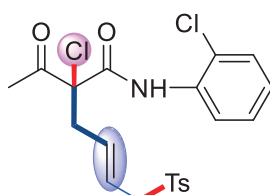

(*E*)-2-Acetyl-2-chloro-*N*-(2-chlorophenyl)-6-tosylhex-4-enamide (**3d1**). Isolated by flash column chromatography (petroleum ether/ethyl acetate = 7:1, v/v) in 41% yield (94.1 mg), *E/Z* > 20:1, which was detected by  $^1H$  NMR spectroscopy. Yellow oil,  $R_f$  (petroleum ether/ethyl acetate = 3:1, v/v) 0.33.  $^1H$  NMR (400 MHz,  $CDCl_3$ )  $\delta$  9.02 (s, 1H), 8.21 (dd,  $J = 8.2, 1.5$  Hz, 1H), 7.69 (d,  $J = 8.3$  Hz, 2H), 7.43 (dd,  $J = 8.0, 1.4$  Hz, 1H), 7.36 – 7.27 (m, 3H), 7.15 (td,  $J = 7.8, 1.5$  Hz, 1H), 5.65 – 5.57 (m, 2H), 3.79 – 3.71 (m, 2H), 3.16 – 3.01 (m, 1H), 2.97 – 2.84 (m, 1H), 2.42 (s, 3H), 2.34 (s, 3H).  $^{13}C$  NMR (101 MHz,  $CDCl_3$ )  $\delta$  196.16, 164.35, 144.80, 135.45, 133.14, 132.59, 129.75, 129.37, 128.41, 127.88, 126.28, 124.21, 122.82, 121.81, 75.89, 59.88, 39.72, 25.13, 21.63. HRMS (ESI-TOF) Calcd for  $C_{21}H_{22}Cl_2NO_4S^+$  ( $[M+H]^+$ ) 454.0641. Found 454.0642.

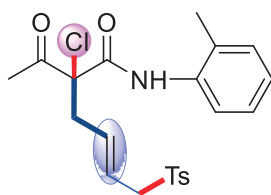

(*E*)-2-Acetyl-2-chloro-*N*-(*o*-tolyl)-6-tosylhex-4-enamide (**3d2**). Isolated by flash column chromatography (petroleum ether/ethyl acetate = 6:1, v/v) in 44% yield (95.2 mg), *E/Z* > 20:1, which was detected by <sup>1</sup>H NMR spectroscopy. Pale yellow oil, *R<sub>f</sub>* (petroleum ether/ethyl acetate = 2.5:1, v/v) 0.33. <sup>1</sup>H NMR (400 MHz, CDCl<sub>3</sub>) δ 8.40 (s, 1H), 7.77 (d, *J* = 8.0 Hz, 1H), 7.68 (d, *J* = 8.3 Hz, 2H), 7.29 (d, *J* = 8.0 Hz, 2H), 7.23 (d, *J* = 7.8 Hz, 2H), 7.18 – 7.11 (m, 1H), 5.77 – 5.47 (m, 2H), 3.82 – 3.68 (m, 2H), 3.11 (d, *J* = 6.3 Hz, 1H), 2.97 – 2.83 (m, 1H), 2.41 (s, 3H), 2.35 (s, 3H), 2.30 (s, 3H). <sup>13</sup>C NMR (101 MHz, CDCl<sub>3</sub>) δ 196.33, 164.27, 144.85, 135.55, 134.31, 133.03, 130.80, 129.79, 129.65, 128.39, 126.95, 126.36, 122.61, 122.57, 75.96, 59.91, 39.60, 25.06, 21.62, 17.64. HRMS (ESI-TOF) Calcd for C<sub>22</sub>H<sub>25</sub>ClNO<sub>4</sub>S<sup>+</sup> ([M+H]<sup>+</sup>) 434.1187. Found 434.1187.

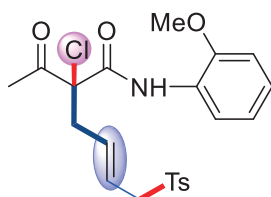

(*E*)-2-Acetyl-2-chloro-*N*-(2-methoxyphenyl)-6-tosylhex-4-enamide (**3d3**). Isolated by flash column chromatography (petroleum ether/ethyl acetate = 6:1, v/v) in 41% yield (91.1 mg), *E/Z* > 20:1, which was detected by <sup>1</sup>H NMR spectroscopy. Pale yellow oil, *R<sub>f</sub>* (petroleum ether/ethyl acetate = 2.5:1, v/v) 0.33. <sup>1</sup>H NMR (400 MHz, CDCl<sub>3</sub>) δ 9.13 (s, 1H), 8.25 (dd, *J* = 8.0, 1.6 Hz, 1H), 7.71 – 7.58 (m, 2H), 7.29 (d, *J* = 8.0 Hz, 2H), 7.18 – 7.10 (m, 1H), 6.98 (td, *J* = 7.8, 1.2 Hz, 1H), 6.93 (dd, *J* = 8.2, 1.2 Hz, 1H), 5.66 – 5.51 (m, 2H), 3.94 (s, 3H), 3.76 – 3.68 (m, 2H), 3.05 (dd, *J* = 14.8, 5.9 Hz, 1H), 2.89 (dd, *J* = 14.8, 6.2 Hz, 1H), 2.41 (s, 3H), 2.32 (s, 3H). <sup>13</sup>C NMR (101 MHz, CDCl<sub>3</sub>) δ 196.57, 163.90, 148.66, 144.73, 135.43, 133.01, 129.72, 128.41, 126.13, 125.37, 122.41, 121.03, 119.74, 110.27, 75.81, 59.89, 55.99, 39.68, 25.05, 21.62. HRMS (ESI-TOF) Calcd for C<sub>22</sub>H<sub>25</sub>ClNO<sub>5</sub>S<sup>+</sup> ([M+H]<sup>+</sup>) 450.1136. Found 450.1137.

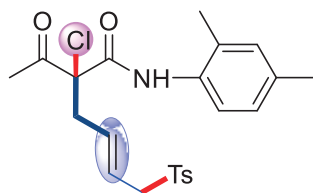



(*E*)-2-Acetyl-2-chloro-*N*-(2,4-dimethylphenyl)-6-tosylhex-4-enamide (**3e**). Isolated by flash column chromatography (petroleum ether/ethyl acetate = 6:1, v/v) in 39% yield (88.1 mg), *E/Z* > 20:1, which was detected by <sup>1</sup>H NMR spectroscopy. Pale yellow oil, *R<sub>f</sub>*(petroleum ether/ethyl acetate = 2.5:1, v/v) 0.33. <sup>1</sup>H NMR (400 MHz, CDCl<sub>3</sub>) δ 8.31 (s, 1H), 7.69 (d, *J* = 8.3 Hz, 2H), 7.58 (d, *J* = 8.7 Hz, 1H), 7.29 (d, *J* = 8.0 Hz, 2H), 7.04 (s, 2H), 5.62 (dt, *J* = 13.4, 6.8 Hz, 2H), 3.75 (dd, *J* = 6.8, 2.8 Hz, 2H), 3.08 (dd, *J* = 14.8, 6.3 Hz, 1H), 2.94 – 2.81 (m, 1H), 2.41 (s, 3H), 2.34 (s, 3H), 2.31 (s, 3H), 2.25 (s, 3H). <sup>13</sup>C NMR (101 MHz, CDCl<sub>3</sub>) δ 196.35, 164.24, 144.83, 136.26, 135.54, 133.08, 131.64, 131.44, 129.78, 128.41, 127.45, 122.78, 122.56, 75.91, 59.94, 39.58, 25.03, 21.62, 20.93, 17.59. HRMS (ESI-TOF) Calcd for C<sub>23</sub>H<sub>27</sub>ClNO<sub>4</sub>S<sup>+</sup> ([M+H]<sup>+</sup>) 448.1344. Found 448.1346.

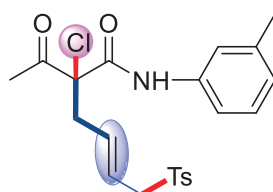

(*E*)-2-Acetyl-2-chloro-*N*-(*m*-tolyl)-6-tosylhex-4-enamide (**3f1**). Isolated by flash column chromatography (petroleum ether/ethyl acetate = 7:1, v/v) in 45% yield (97.6 mg), *E/Z* > 20:1, which was detected by <sup>1</sup>H NMR spectroscopy. Pale yellow oil, *R<sub>f</sub>*(petroleum ether/ethyl acetate = 3:1, v/v) 0.33. <sup>1</sup>H NMR (400 MHz, CDCl<sub>3</sub>) δ 8.40 (s, 1H), 7.77 (d, *J* = 8.0 Hz, 1H), 7.68 (d, *J* = 8.3 Hz, 2H), 7.29 (d, *J* = 8.0 Hz, 2H), 7.23 (d, *J* = 7.8 Hz, 2H), 7.18 – 7.11 (m, 1H), 5.73 – 5.50 (m, 2H), 3.80 – 3.69 (m, 2H), 3.17 – 3.00 (m, 1H), 2.94 – 2.84 (m, 1H), 2.41 (s, 3H), 2.35 (s, 3H), 2.30 (s, 3H). <sup>13</sup>C NMR (101 MHz, CDCl<sub>3</sub>) δ 196.33, 164.27, 144.85, 135.55, 134.31, 133.03, 130.80, 129.79, 129.65, 128.39, 126.95, 126.36, 122.61, 122.57, 75.96, 59.91, 39.60, 25.06, 21.62, 17.64. HRMS (ESI-TOF) Calcd for C<sub>22</sub>H<sub>25</sub>ClNO<sub>4</sub>S<sup>+</sup> ([M+H]<sup>+</sup>) 434.1187. Found 434.1190.

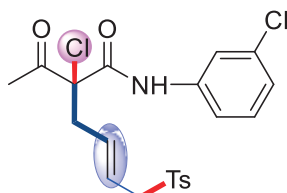

(*E*)-2-Acetyl-2-chloro-*N*-(3-chlorophenyl)-6-tosylhex-4-enamide (**3f2**). Isolated by flash column chromatography (petroleum ether/ethyl acetate = 6:1, v/v) in 34% yield (77.3 mg), *E/Z* > 20:1, which was detected by <sup>1</sup>H NMR spectroscopy. Pale yellow oil, *R<sub>f</sub>*(petroleum ether/ethyl acetate = 2.5:1, v/v) 0.33. <sup>1</sup>H NMR (400 MHz, CDCl<sub>3</sub>) δ 8.53 (s, 1H), 7.78 (t, *J* = 2.0 Hz, 1H), 7.71 (d, *J* = 8.3 Hz, 2H), 7.46 (ddd, *J* = 8.2, 2.0, 0.9

Hz, 1H), 7.36 – 7.28 (m, 3H), 7.18 (ddd,  $J = 8.0, 2.0, 1.0$  Hz, 1H), 5.65 (dtd,  $J = 22.9, 15.3, 7.9$  Hz, 2H), 3.74 (ddd,  $J = 21.6, 13.7, 7.2$  Hz, 2H), 3.09 (dd,  $J = 14.7, 6.4$  Hz, 1H), 2.84 (dd,  $J = 14.7, 7.9$  Hz, 1H), 2.45 (s, 3H), 2.35 (s, 3H).  $^{13}\text{C}$  NMR (101 MHz,  $\text{CDCl}_3$ )  $\delta$  196.18, 164.74, 144.96, 137.53, 135.81, 134.84, 133.33, 130.16, 129.88, 128.24, 125.67, 122.57, 120.38, 118.35, 75.29, 59.95, 39.34, 25.21, 21.66. HRMS (ESI-TOF) Calcd for  $\text{C}_{21}\text{H}_{22}\text{Cl}_2\text{NO}_4\text{S}^+$  ( $[\text{M}+\text{H}]^+$ ) 454.0641. Found 454.0645.

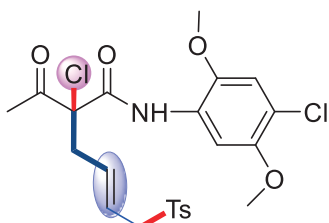

(*E*)-2-Acetyl-2-chloro-*N*-(4-chloro-2,5-dimethoxyphenyl)-6-tosylhex-4-enamide (**3g**), Isolated by flash column chromatography (petroleum ether/ethyl acetate = 5:1, v/v) in 32% yield (82.7 mg),  $E/Z > 20:1$ , which was detected by  $^1\text{H}$  NMR spectroscopy. Pale yellow solid, m.p. = 132.6-133.6 °C,  $R_f$  (petroleum ether/ethyl acetate = 2:1, v/v) 0.33.  $^1\text{H}$  NMR (400 MHz,  $\text{CDCl}_3$ )  $\delta$  9.14 (s, 1H), 8.11 (s, 1H), 7.68 (d,  $J = 8.3$  Hz, 2H), 7.30 (d,  $J = 8.0$  Hz, 2H), 6.95 (s, 1H), 5.60 (qd,  $J = 15.4, 8.8$  Hz, 2H), 3.90 (s, 3H), 3.88 (s, 3H), 3.73 (d,  $J = 6.3$  Hz, 2H), 3.05 (dd,  $J = 14.7, 6.3$  Hz, 1H), 2.96 – 2.85 (m, 1H), 2.43 (s, 3H), 2.33 (s, 3H).  $^{13}\text{C}$  NMR (101 MHz,  $\text{CDCl}_3$ )  $\delta$  196.51, 164.03, 149.11, 144.79, 142.64, 135.59, 132.87, 129.75, 128.36, 125.35, 122.52, 117.60, 112.62, 104.76, 75.92, 59.84, 56.76, 56.69, 39.79, 25.19, 21.63. HRMS (ESI-TOF) Calcd for  $\text{C}_{23}\text{H}_{26}\text{Cl}_2\text{NO}_6\text{S}^+$  ( $[\text{M}+\text{H}]^+$ ) 514.0852. Found 514.0854.

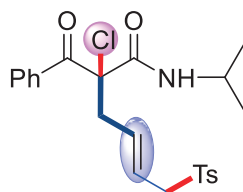

(*E*)-2-Benzoyl-2-chloro-*N*-isopropyl-6-tosylhex-4-enamide (**3h**). Isolated by flash column chromatography (petroleum ether/ethyl acetate = 6:1, v/v) in 36% yield (81.0 mg),  $E/Z > 20:1$ , which was detected by  $^1\text{H}$  NMR spectroscopy. Pale yellow oil,  $R_f$  (petroleum ether/ethyl acetate = 3:1, v/v) 0.33.  $^1\text{H}$  NMR (400 MHz,  $\text{CDCl}_3$ )  $\delta$  7.95 (d,  $J = 7.3$  Hz, 2H), 7.76 (d,  $J = 8.3$  Hz, 2H), 7.54 (t,  $J = 7.4$  Hz, 1H), 7.41 (t,  $J = 7.8$  Hz, 2H), 7.35 (d,  $J = 8.0$  Hz, 2H), 6.73 (d,  $J = 8.0$  Hz, 1H), 5.69 (dt,  $J = 14.8, 7.4$  Hz, 1H), 5.62 – 5.49 (m, 1H), 4.07 (tt,  $J = 13.3, 6.6$  Hz, 1H), 3.77 (ddd,  $J = 21.9, 13.9, 7.3$  Hz, 2H), 3.11 (dd,  $J = 14.6, 6.7$  Hz, 1H), 2.95 (dd,  $J = 14.7, 7.9$  Hz, 1H), 2.45 (s, 3H), 1.23 (dd,  $J = 7.7, 6.7$  Hz, 6H).  $^{13}\text{C}$  NMR (101 MHz,  $\text{CDCl}_3$ )  $\delta$  189.69, 166.06, 144.89, 135.72, 133.65, 133.56, 133.33, 129.86, 129.38, 128.41, 128.31, 122.16, 72.01, 60.11, 42.57,

41.03, 22.35, 22.08, 21.68. HRMS (ESI-TOF) Calcd for  $C_{23}H_{27}ClNO_4S^+$  ( $[M+H]^+$ ) 448.1344. Found 448.1345.

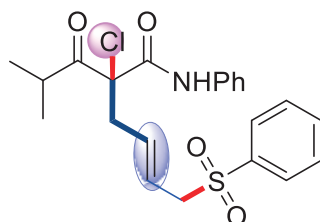

(*E*)-2-Chloro-2-isobutyryl-*N*-phenyl-6-(phenylsulfonyl)hex-4-enamide (**3i1**). Isolated by flash column chromatography (petroleum ether/ethyl acetate = 7:1, v/v) in 34% yield (73.8 mg), *E/Z* > 20:1, which was detected by  $^1H$  NMR spectroscopy. Yellow oil,  $R_f$  (petroleum ether/ethyl acetate = 3:1, v/v) 0.33.  $^1H$  NMR (400 MHz,  $CDCl_3$ )  $\delta$  8.48 (s, 1H), 7.82 (d,  $J = 7.2$  Hz, 2H), 7.62 (t,  $J = 7.5$  Hz, 1H), 7.58 (d,  $J = 7.6$  Hz, 2H), 7.51 (t,  $J = 7.7$  Hz, 2H), 7.38 (t,  $J = 7.9$  Hz, 2H), 7.20 (t,  $J = 7.4$  Hz, 1H), 5.62 (dtd,  $J = 22.4, 15.1, 7.1$  Hz, 2H), 3.76 (qd,  $J = 13.9, 7.2$  Hz, 2H), 3.10 (dd,  $J = 14.7, 6.5$  Hz, 1H), 3.02 (dt,  $J = 13.4, 6.7$  Hz, 1H), 2.83 (dd,  $J = 14.8, 7.7$  Hz, 1H), 1.22 (d,  $J = 6.7$  Hz, 3H), 1.15 (d,  $J = 6.7$  Hz, 3H).  $^{13}C$  NMR (101 MHz,  $CDCl_3$ )  $\delta$  203.65, 164.23, 138.62, 136.41, 133.80, 133.65, 129.20, 129.18, 128.32, 125.62, 122.15, 120.29, 75.90, 59.88, 39.49, 37.53, 21.46, 20.70, HRMS (ESI-TOF) Calcd for  $C_{23}H_{25}ClNO_4S^+$  ( $[M+H]^+$ ) 434.1187. Found 434.1190.

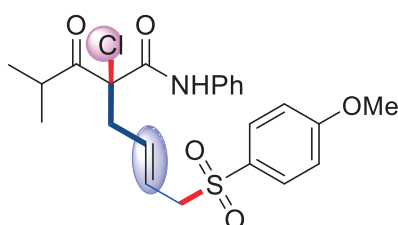

(*E*)-2-Chloro-2-isobutyryl-6-((4-methoxyphenyl)sulfonyl)-*N*-phenylhex-4-enamide (**3i2**). Isolated by flash column chromatography (petroleum ether/ethyl acetate = 5:1, v/v) in 33% yield (76.6 mg), *E/Z* > 20:1, which was detected by  $^1H$  NMR spectroscopy. Yellow oil,  $R_f$  (petroleum ether/ethyl acetate = 2:1, v/v) 0.33.  $^1H$  NMR (400 MHz,  $CDCl_3$ )  $\delta$  9.14 (s, 1H), 8.11 (s, 1H), 7.68 (d,  $J = 8.3$  Hz, 2H), 7.30 (d,  $J = 8.0$  Hz, 2H), 6.95 (s, 1H), 5.60 (qd,  $J = 15.4, 8.8$  Hz, 2H), 3.90 (s, 3H), 3.88 (s, 3H), 3.73 (d,  $J = 6.3$  Hz, 2H), 3.05 (dd,  $J = 14.7, 6.3$  Hz, 1H), 2.91 (dd,  $J = 14.7, 6.4$  Hz, 1H), 2.44 (d,  $J = 9.7$  Hz, 3H), 2.33 (s, 3H).  $^{13}C$  NMR (101 MHz,  $CDCl_3$ )  $\delta$  196.51, 164.03, 149.11, 144.79, 142.64, 135.59, 132.87, 129.75, 128.36, 125.35, 122.52, 117.60, 112.62, 104.76, 75.92, 59.84, 56.76, 56.69, 39.79, 25.19, 21.63. HRMS (ESI-TOF) Calcd for  $C_{23}H_{27}ClNO_5S^+$  ( $[M+H]^+$ ) 464.1293. Found 464.1296.

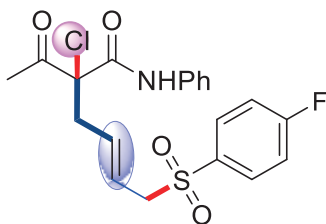

(*E*)-2-Acetyl-2-chloro-6-((4-fluorophenyl)sulfonyl)-*N*-phenylhex-4-enamide (**3j1**).

Isolated by flash column chromatography (petroleum ether/ethyl acetate = 4:1, v/v) in 31% yield (66.4 mg), *E/Z* > 20:1, which was detected by <sup>1</sup>H NMR spectroscopy. Yellow oil, *R<sub>f</sub>* (petroleum ether/ethyl acetate = 2:1, v/v) 0.33. <sup>1</sup>H NMR (400 MHz, CDCl<sub>3</sub>) δ 8.47 (s, 1H), 7.86 – 7.76 (m, 2H), 7.64 – 7.53 (m, 2H), 7.43 – 7.33 (m, 2H), 7.24 – 7.12 (m, 3H), 5.78 – 5.64 (m, 1H), 5.64 – 5.49 (m, 1H), 3.86 – 3.65 (m, 2H), 3.10 (dd, *J* = 14.8, 6.6 Hz, 1H), 2.87 (dd, *J* = 14.8, 7.7 Hz, 1H), 2.35 (s, 3H). <sup>13</sup>C NMR (101 MHz, CDCl<sub>3</sub>) δ 196.26, 165.83 (d, *J* = 257.7 Hz), 164.33, 136.33, 134.59 (d, *J* = 3.2 Hz), 133.81, 131.24 (d, *J* = 9.7 Hz), 129.24, 125.75, 122.07, 120.24, 116.55 (d, *J* = 22.7 Hz), 75.40, 59.97, 39.46, 25.11. <sup>19</sup>F NMR (376 MHz, CDCl<sub>3</sub>) δ -103.03. HRMS (ESI-TOF) Calcd for C<sub>20</sub>H<sub>20</sub>ClFNO<sub>4</sub>S<sup>+</sup> ([M+H]<sup>+</sup>) 424.0780. Found 424.0782.

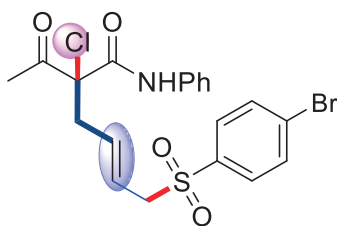

(*E*)-2-Acetyl-6-((4-bromophenyl)sulfonyl)-2-chloro-*N*-phenylhex-4-enamide (**3j2**).

Isolated by flash column chromatography (petroleum ether/ethyl acetate = 6:1, v/v) in 41% yield (98.5 mg), *E/Z* > 20:1, which was detected by <sup>1</sup>H NMR spectroscopy. Yellow oil, *R<sub>f</sub>* (petroleum ether/ethyl acetate = 3:1, v/v) 0.33. <sup>1</sup>H NMR (400 MHz, CDCl<sub>3</sub>) δ 8.46 (s, 1H), 7.65 (t, *J* = 1.9 Hz, 4H), 7.61 – 7.54 (m, 2H), 7.43 – 7.34 (m, 2H), 7.24 – 7.16 (m, 1H), 5.70 (ddd, *J* = 14.7, 7.7, 6.9 Hz, 1H), 5.63 – 5.42 (m, 1H), 3.76 (qd, *J* = 14.0, 7.3 Hz, 2H), 3.10 (dd, *J* = 14.8, 6.7 Hz, 1H), 2.86 (dd, *J* = 14.8, 7.8 Hz, 1H), 2.35 (s, 3H). <sup>13</sup>C NMR (101 MHz, CDCl<sub>3</sub>) δ 196.24, 164.32, 137.54, 136.32, 133.96, 132.55, 129.90, 129.25, 125.76, 121.92, 120.25, 75.40, 59.85, 39.47, 25.11. HRMS (ESI-TOF) Calcd for C<sub>20</sub>H<sub>20</sub>BrClNO<sub>4</sub>S<sup>+</sup> ([M+H]<sup>+</sup>) 483.9979. Found 483.9978.

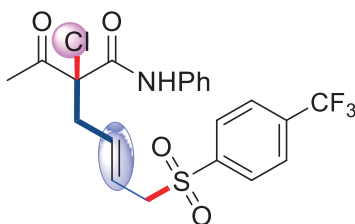

(E)-2-Acetyl-2-chloro-N-phenyl-6-((4-(trifluoromethyl)phenyl)sulfonyl)hex-4-enamide (**3j3**). Isolated by flash column chromatography (petroleum ether/ethyl acetate = 4:1, v/v) in 33% yield (77.4 mg), *E/Z* > 20:1, which was detected by <sup>1</sup>H NMR spectroscopy. Yellow oil, *R<sub>f</sub>* (petroleum ether/ethyl acetate = 2:1, v/v) 0.33. <sup>1</sup>H NMR (400 MHz, CDCl<sub>3</sub>) δ 8.47 (s, 1H), 7.95 (d, *J* = 8.1 Hz, 2H), 7.78 (d, *J* = 8.2 Hz, 2H), 7.62 – 7.55 (m, 2H), 7.42 – 7.35 (m, 2H), 7.24 – 7.18 (m, 1H), 5.73 (ddd, *J* = 14.7, 7.6, 6.9 Hz, 1H), 5.58 (dt, *J* = 15.2, 7.0 Hz, 1H), 3.89 – 3.68 (m, 2H), 3.10 (dd, *J* = 14.7, 6.8 Hz, 1H), 2.88 (dd, *J* = 14.8, 7.7 Hz, 1H), 2.34 (s, 3H). <sup>13</sup>C NMR (101 MHz, CDCl<sub>3</sub>) δ 196.20, 164.27, 142.05, 136.31, 135.54 (q, *J* = 33.2 Hz), 134.37, 129.25, 129.02, 126.38 (q, *J* = 3.6 Hz), 125.78, 123.08 (q, *J* = 274.3 Hz), 121.51, 120.23, 75.37, 59.72, 39.47, 25.08. <sup>19</sup>F NMR (376 MHz, CDCl<sub>3</sub>) δ -63.16. HRMS (ESI-TOF) Calcd for C<sub>21</sub>H<sub>20</sub>ClF<sub>3</sub>NO<sub>4</sub>S<sup>+</sup> ([M+H]<sup>+</sup>) 474.0748. Found 474.0747.

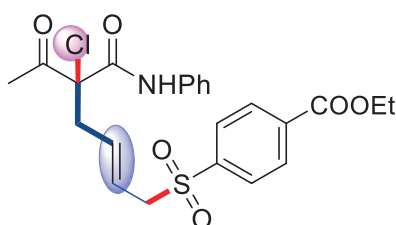

Ethyl (E)-4-((5-chloro-6-oxo-5-(phenylcarbamoyl)hept-2-en-1-yl)sulfonyl)benzoate (**3j4**). Isolated by flash column chromatography (petroleum ether/ethyl acetate = 6:1, v/v) in 45% yield (108.3 mg), *E/Z* > 20:1, which was detected by <sup>1</sup>H NMR spectroscopy. Yellow oil, *R<sub>f</sub>* (petroleum ether/ethyl acetate = 3:1, v/v) 0.33. <sup>1</sup>H NMR (400 MHz, CDCl<sub>3</sub>) δ 8.47 (s, 1H), 8.18 (d, *J* = 8.6 Hz, 2H), 7.89 (d, *J* = 8.6 Hz, 2H), 7.58 (dd, *J* = 8.6, 1.0 Hz, 2H), 7.38 (t, *J* = 8.0 Hz, 2H), 7.24 – 7.18 (m, 1H), 5.70 (ddd, *J* = 14.7, 7.7, 6.9 Hz, 1H), 5.64 – 5.49 (m, 1H), 4.43 (q, *J* = 7.1 Hz, 2H), 3.79 (qd, *J* = 14.0, 7.3 Hz, 2H), 3.09 (dd, *J* = 14.8, 6.6 Hz, 1H), 2.85 (dd, *J* = 14.7, 7.8 Hz, 1H), 2.34 (s, 3H), 1.43 (t, *J* = 7.1 Hz, 3H). <sup>13</sup>C NMR (101 MHz, CDCl<sub>3</sub>) δ 196.25, 164.96, 164.33, 142.21, 136.31, 135.34, 134.05, 130.29, 129.22, 128.42, 125.74, 121.80, 120.29, 75.35, 61.89, 59.74, 39.47, 25.10, 14.27. HRMS (ESI-TOF) Calcd for C<sub>23</sub>H<sub>25</sub>ClNO<sub>6</sub>S<sup>+</sup> ([M+H]<sup>+</sup>) 478.1086. Found 478.1089.

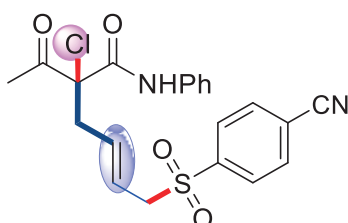

(E)-2-Acetyl-2-chloro-6-((4-cyanophenyl)sulfonyl)-N-phenylhex-4-enamide (**3j5**). Isolated by flash column chromatography (petroleum ether/ethyl acetate = 6:1, v/v) in

52% yield (112.9 mg),  $E/Z > 20:1$ , which was detected by  $^1\text{H}$  NMR spectroscopy. Brown oil,  $R_f$  (petroleum ether/ethyl acetate = 3:1, v/v) 0.33.  $^1\text{H}$  NMR (400 MHz,  $\text{CDCl}_3$ )  $\delta$  8.46 (s, 1H), 7.95 – 7.85 (m, 2H), 7.81 – 7.73 (m, 2H), 7.62 – 7.53 (m, 2H), 7.44 – 7.35 (m, 2H), 7.25 – 7.18 (m, 1H), 5.72 (dd,  $J = 15.0, 7.6$  Hz, 1H), 5.63 – 5.47 (m, 1H), 3.87 – 3.71 (m, 2H), 3.10 (dd,  $J = 14.8, 7.0$  Hz, 1H), 2.88 (dd,  $J = 14.8, 7.5$  Hz, 1H), 2.35 (s, 3H).  $^{13}\text{C}$  NMR (101 MHz,  $\text{CDCl}_3$ )  $\delta$  196.13, 164.19, 142.58, 136.28, 134.60, 132.96, 129.31, 129.12, 125.86, 121.24, 120.23, 117.67, 117.06, 75.33, 59.64, 39.49, 25.06. HRMS (ESI-TOF) Calcd for  $\text{C}_{21}\text{H}_{20}\text{ClN}_2\text{O}_4\text{S}^+$  ( $[\text{M}+\text{H}]^+$ ) 431.0827. Found 431.0827.

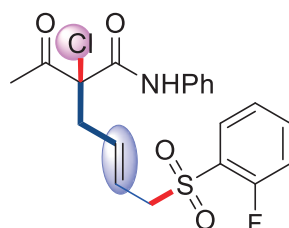

(*E*)-2-Acetyl-2-chloro-6-((2-fluorophenyl)sulfonyl)-*N*-phenylhex-4-enamide (**3k**). Isolated by flash column chromatography (petroleum ether/ethyl acetate = 4:1, v/v) in 46% yield (97.3 mg),  $E/Z > 20:1$ , which was detected by  $^1\text{H}$  NMR spectroscopy. Yellow oil,  $R_f$  (petroleum ether/ethyl acetate = 2:1, v/v) 0.33.  $^1\text{H}$  NMR (400 MHz,  $\text{CDCl}_3$ )  $\delta$  8.42 (s, 1H), 7.83 – 7.76 (m, 1H), 7.65 – 7.60 (m, 1H), 7.58 (dt,  $J = 8.8, 1.7$  Hz, 2H), 7.39 (dd,  $J = 11.3, 4.6$  Hz, 2H), 7.30 – 7.25 (m, 1H), 7.20 (dt,  $J = 9.4, 4.1$  Hz, 2H), 5.75 (ddd,  $J = 14.8, 7.8, 6.9$  Hz, 1H), 5.60 (dt,  $J = 14.9, 7.4$  Hz, 1H), 3.99 (qd,  $J = 13.9, 7.4$  Hz, 2H), 3.05 (dd,  $J = 14.7, 6.7$  Hz, 1H), 2.82 (dd,  $J = 14.7, 7.9$  Hz, 1H), 2.31 (s, 3H).  $^{13}\text{C}$  NMR (101 MHz,  $\text{CDCl}_3$ )  $\delta$  196.29, 164.36, 159.43 (d,  $J = 256.4$  Hz), 136.34 (d,  $J = 8.4$  Hz), 136.33, 133.90, 130.88, 129.22, 126.38 (d,  $J = 14.8$  Hz), 125.73, 124.80 (d,  $J = 3.7$  Hz), 121.77, 120.36, 117.10 (d,  $J = 15.4$  Hz), 75.27, 59.15, 59.13, 39.38, 25.11. HRMS (ESI-TOF) Calcd for  $\text{C}_{20}\text{H}_{20}\text{ClFNO}_4\text{S}^+$  ( $[\text{M}+\text{H}]^+$ ) 424.0780. Found 424.0781.

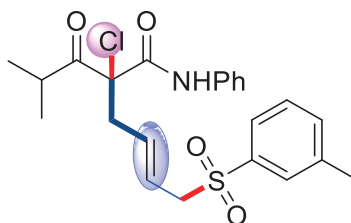

(*E*)-2-Chloro-2-isobutyryl-*N*-phenyl-6-(*m*-tolylsulfonyl)hex-4-enamide (**311**). Isolated by flash column chromatography (petroleum ether/ethyl acetate = 6:1, v/v) in 60% yield (134.5 mg),  $E/Z = 16:1$ , which was detected by  $^1\text{H}$  NMR spectroscopy. Pale yellow solid, m.p. = 114.5-115.4 °C,  $R_f$  (petroleum ether/ethyl acetate = 3:1, v/v) 0.33.  $^1\text{H}$  NMR (400 MHz,  $\text{CDCl}_3$ )  $\delta$  8.48 (s, 1H), 7.67 – 7.53 (m, 4H), 7.44 – 7.34 (m, 4H), 7.24 – 7.15

(m, 1H), 5.74 – 5.62 (m, 1H), 5.62 – 5.51 (m, 1H), 3.75 (qd,  $J = 13.9, 7.2$  Hz, 2H), 3.11 (dd,  $J = 14.7, 6.4$  Hz, 1H), 3.02 (dt,  $J = 13.3, 6.7$  Hz, 1H), 2.83 (dd,  $J = 14.7, 7.9$  Hz, 1H), 2.41 (s, 3H), 1.22 (d,  $J = 6.7$  Hz, 3H), 1.16 (d,  $J = 6.7$  Hz, 3H).  $^{13}\text{C}$  NMR (101 MHz,  $\text{CDCl}_3$ )  $\delta$  203.71, 164.29, 139.54, 138.51, 136.41, 134.61, 133.55, 129.19, 129.04, 128.58, 125.62, 125.47, 122.24, 120.37, 75.90, 59.89, 39.49, 37.58, 21.50, 21.33, 20.72. HRMS (ESI-TOF) Calcd for  $\text{C}_{23}\text{H}_{27}\text{ClNO}_4\text{S}^+$  ( $[\text{M}+\text{H}]^+$ ) 448.1344. Found 448.1344.

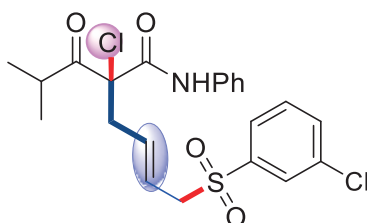

(*E*)-2-Chloro-6-((3-chlorophenyl)sulfonyl)-2-isobutyryl-*N*-phenylhex-4-enamide (**312**). Isolated by flash column chromatography (petroleum ether/ethyl acetate = 6:1, v/v) in 43% yield (101.7 mg),  $E/Z > 20:1$ , which was detected by  $^1\text{H}$  NMR spectroscopy. Pale yellow oil,  $R_f$  (petroleum ether/ethyl acetate = 3:1, v/v) 0.33.  $^1\text{H}$  NMR (400 MHz,  $\text{CDCl}_3$ )  $\delta$  8.48 (s, 1H), 7.85 (t,  $J = 1.8$  Hz, 1H), 7.72 – 7.66 (m, 1H), 7.62 – 7.53 (m, 3H), 7.45 (t,  $J = 7.9$  Hz, 1H), 7.39 (dd,  $J = 10.7, 5.2$  Hz, 2H), 7.21 (dd,  $J = 11.7, 4.2$  Hz, 1H), 5.75 – 5.63 (m, 1H), 5.58 (dt,  $J = 15.2, 6.9$  Hz, 1H), 3.78 (qd,  $J = 14.0, 7.2$  Hz, 2H), 3.13 (dd,  $J = 14.8, 6.4$  Hz, 1H), 3.03 (dt,  $J = 13.3, 6.7$  Hz, 1H), 2.85 (dd,  $J = 14.7, 7.8$  Hz, 1H), 1.22 (d,  $J = 6.7$  Hz, 3H), 1.15 (d,  $J = 6.7$  Hz, 3H).  $^{13}\text{C}$  NMR (101 MHz,  $\text{CDCl}_3$ )  $\delta$  203.58, 164.13, 140.23, 136.34, 135.46, 134.18, 133.98, 130.50, 129.22, 128.48, 126.51, 125.67, 121.67, 120.26, 75.83, 59.83, 39.54, 37.48, 21.42, 20.70. HRMS (ESI-TOF) Calcd for  $\text{C}_{22}\text{H}_{24}\text{Cl}_2\text{NO}_4\text{S}^+$  ( $[\text{M}+\text{H}]^+$ ) 468.0798. Found 468.0799.

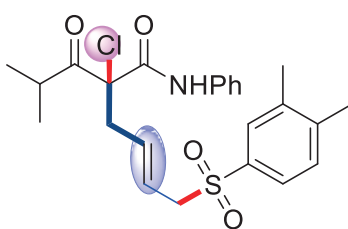

(*E*)-2-Chloro-6-((3,4-dimethylphenyl)sulfonyl)-2-isobutyryl-*N*-phenylhex-4-enamide (**3m**). Isolated by flash column chromatography (petroleum ether/ethyl acetate = 6:1, v/v) in 38% yield (88.7 mg),  $E/Z > 20:1$ , which was detected by  $^1\text{H}$  NMR spectroscopy. Pale yellow solid, m.p. = 129.1-130.5  $^\circ\text{C}$ ,  $R_f$  (petroleum ether/ethyl acetate = 2.5:1, v/v) 0.33.  $^1\text{H}$  NMR (400 MHz,  $\text{CDCl}_3$ )  $\delta$  8.50 (s, 1H), 7.58 (ddd,  $J = 4.2, 3.3, 1.7$  Hz, 3H), 7.53 (dd,  $J = 7.9, 1.9$  Hz, 1H), 7.41 – 7.33 (m, 2H), 7.25 (d,  $J = 8.2$  Hz, 1H), 7.22 – 7.16 (m, 1H), 5.74 – 5.62 (m, 1H), 5.61 – 5.48 (m, 1H), 3.73 (qd,  $J = 13.8, 7.2$  Hz, 2H), 3.10 (dd,  $J = 14.7, 6.4$  Hz, 1H), 3.03 (dt,  $J = 13.4, 6.7$  Hz, 1H), 2.82 (dd,  $J = 14.7, 7.9$  Hz,

1H), 2.32 (s, 3H), 2.30 (s, 3H), 1.22 (d,  $J = 6.7$  Hz, 3H), 1.16 (d,  $J = 6.7$  Hz, 3H).  $^{13}\text{C}$  NMR (101 MHz,  $\text{CDCl}_3$ )  $\delta$  203.75, 164.36, 143.55, 138.06, 136.44, 135.91, 133.34, 130.28, 129.18, 128.99, 125.87, 125.61, 122.47, 120.42, 75.93, 59.99, 39.49, 37.59, 21.49, 20.71, 20.04, 19.80. HRMS (ESI-TOF) Calcd for  $\text{C}_{24}\text{H}_{29}\text{ClNO}_4\text{S}^+$  ( $[\text{M}+\text{H}]^+$ ) 462.1500. Found 462.1502.

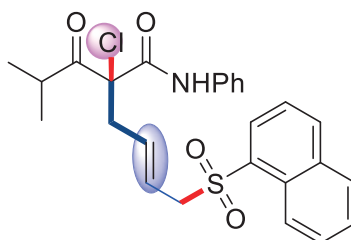

(*E*)-2-Chloro-2-isobutyryl-6-(naphthalen-1-ylsulfonyl)-*N*-phenylhex-4-enamide (**3n**). Isolated by flash column chromatography (petroleum ether/ethyl acetate = 6:1, v/v) in 34% yield (82.1 mg),  $E/Z > 20:1$ , which was detected by  $^1\text{H}$  NMR spectroscopy. Brown oil,  $R_f$  (petroleum ether/ethyl acetate = 3:1, v/v) 0.33.  $^1\text{H}$  NMR (400 MHz,  $\text{CDCl}_3$ )  $\delta$  8.67 (d,  $J = 8.5$  Hz, 1H), 8.41 (s, 1H), 8.18 (dd,  $J = 7.3, 1.2$  Hz, 1H), 8.10 (d,  $J = 8.2$  Hz, 1H), 7.97 – 7.91 (m, 1H), 7.67 – 7.52 (m, 5H), 7.38 (dd,  $J = 10.7, 5.1$  Hz, 2H), 7.20 (dd,  $J = 10.6, 4.2$  Hz, 1H), 5.62 – 5.46 (m, 2H), 4.05 – 3.88 (m, 2H), 3.08 – 2.93 (m, 2H), 2.79 – 2.69 (m, 1H), 1.19 (d,  $J = 6.7$  Hz, 3H), 1.13 (d,  $J = 6.7$  Hz, 3H).  $^{13}\text{C}$  NMR (101 MHz,  $\text{CDCl}_3$ )  $\delta$  203.65, 164.26, 136.38, 135.31, 134.14, 133.63, 133.45, 131.21, 129.30, 129.18, 128.85, 128.77, 127.04, 125.59, 124.37, 123.99, 122.14, 120.36, 75.72, 59.48, 39.40, 37.54, 21.44, 20.67. HRMS (ESI-TOF) Calcd for  $\text{C}_{26}\text{H}_{27}\text{ClNO}_4\text{S}^+$  ( $[\text{M}+\text{H}]^+$ ) 484.1344. Found 484.1347.

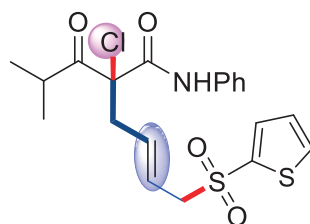

(*E*)-2-Chloro-2-isobutyryl-*N*-phenyl-6-(thiophen-2-ylsulfonyl)hex-4-enamide (**3o**). Isolated by flash column chromatography (petroleum ether/ethyl acetate = 6:1, v/v) in 29% yield (63.6 mg),  $E/Z = 17:1$ , which was detected by  $^1\text{H}$  NMR spectroscopy. Yellow oil,  $R_f$  (petroleum ether/ethyl acetate = 3:1, v/v) 0.33.  $^1\text{H}$  NMR (400 MHz,  $\text{CDCl}_3$ )  $\delta$  8.49 (s, 1H), 7.66 (dd,  $J = 5.0, 1.3$  Hz, 1H), 7.59 (ddd,  $J = 9.6, 6.1, 1.0$  Hz, 3H), 7.42 – 7.34 (m, 2H), 7.23 – 7.17 (m, 1H), 7.10 (dd,  $J = 5.0, 3.8$  Hz, 1H), 5.68 (tdd,  $J = 22.2, 15.3, 6.8$  Hz, 2H), 3.85 (qd,  $J = 13.8, 6.9$  Hz, 2H), 3.14 (dd,  $J = 14.6, 6.4$  Hz, 1H), 3.03 (dt,  $J = 13.3, 6.7$  Hz, 1H), 2.86 (dd,  $J = 14.6, 7.4$  Hz, 1H), 1.22 (d,  $J = 6.7$  Hz, 3H), 1.16 (d,  $J = 6.7$  Hz, 3H).  $^{13}\text{C}$  NMR (101 MHz,  $\text{CDCl}_3$ )  $\delta$  203.67, 164.21, 139.41, 136.42,



134.55, 134.23, 133.99, 129.22, 127.87, 125.64, 122.14, 120.31, 75.84, 61.13, 39.54, 37.53, 21.46, 20.71. HRMS (ESI-TOF) Calcd for  $C_{20}H_{23}ClNO_4S_2^+$  ( $[M+H]^+$ ) 440.0752. Found 440.0749.

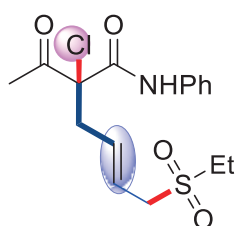

(*E*)-2-Acetyl-2-chloro-6-(ethylsulfonyl)-*N*-phenylhex-4-enamide (**3p**). Isolated by flash column chromatography (petroleum ether/ethyl acetate = 5:1, v/v) in 38% yield (67.0 mg), *E/Z* > 20:1, which was detected by  $^1H$  NMR spectroscopy. Yellow oil,  $R_f$  (petroleum ether/ethyl acetate = 2:1, v/v) 0.33.  $^1H$  NMR (400 MHz,  $CDCl_3$ )  $\delta$  8.53 (s, 1H), 7.63 – 7.55 (m, 2H), 7.38 (dd,  $J$  = 10.8, 5.1 Hz, 2H), 7.20 (t,  $J$  = 7.4 Hz, 1H), 5.89 (dt,  $J$  = 14.7, 7.3 Hz, 1H), 5.80 – 5.66 (m, 1H), 3.71 – 3.56 (m, 2H), 3.17 (dd,  $J$  = 14.6, 7.0 Hz, 1H), 2.93 (dd,  $J$  = 14.5, 7.4 Hz, 1H), 2.89 – 2.78 (m, 2H), 2.36 (s, 3H), 1.25 (t,  $J$  = 7.5 Hz, 3H).  $^{13}C$  NMR (101 MHz,  $CDCl_3$ )  $\delta$  196.40, 164.44, 136.37, 133.46, 129.22, 125.72, 122.42, 120.24, 75.34, 55.65, 45.85, 39.65, 25.17, 6.26. HRMS (ESI-TOF) Calcd for  $C_{16}H_{21}ClNO_4S^+$  ( $[M+H]^+$ ) 358.0874. Found 358.0874.

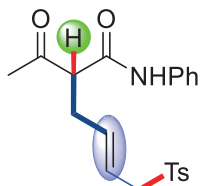

(*E*)-2-Acetyl-*N*-phenyl-6-tosylhex-4-enamide (**4a**). Isolated by flash column chromatography (petroleum ether/ethyl acetate = 6:1, v/v) in 83% yield (160.3 mg), *E/Z* > 20:1, which was detected by  $^1H$  NMR spectroscopy. Yellow oil,  $R_f$  (petroleum ether/ethyl acetate = 3:1, v/v) 0.33.  $^1H$  NMR (400 MHz,  $CDCl_3$ )  $\delta$  8.28 (s, 1H), 7.69 (d,  $J$  = 8.2 Hz, 2H), 7.53 (d,  $J$  = 7.7 Hz, 2H), 7.31 (t,  $J$  = 8.5 Hz, 4H), 7.12 (t,  $J$  = 7.4 Hz, 1H), 5.72 – 5.59 (m, 1H), 5.59 – 5.44 (m, 1H), 3.72 (d,  $J$  = 7.2 Hz, 2H), 3.50 (t,  $J$  = 7.3 Hz, 1H), 2.67 (t,  $J$  = 7.0 Hz, 2H), 2.42 (s, 3H), 2.26 (s, 3H).  $^{13}C$  NMR (101 MHz,  $CDCl_3$ )  $\delta$  205.90, 165.90, 144.93, 137.45, 136.59, 135.57, 129.86, 129.03, 128.29, 124.77, 120.05, 119.52, 61.07, 59.86, 32.88, 29.53, 21.64. HRMS (ESI-TOF) Calcd for  $C_{21}H_{24}NO_4S^+$  ( $[M+H]^+$ ) 386.1421. Found 386.1422.

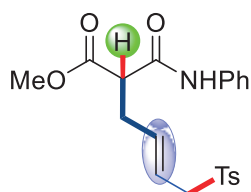

Methyl (*E*)-2-(phenylcarbamoyl)-6-tosylhex-4-enoate (**4a1**). Isolated by flash column chromatography (petroleum ether/ethyl acetate = 2:1, v/v) in 67% yield (134.6 mg), *E/Z* > 20:1, which was detected by <sup>1</sup>H NMR spectroscopy. Colourless oil, *R<sub>f</sub>*(petroleum ether/ethyl acetate = 1:1, v/v) 0.33. <sup>1</sup>H NMR (400 MHz, CDCl<sub>3</sub>) δ 8.56 (s, 1H), 7.73 – 7.63 (m, 2H), 7.54 (dd, *J* = 8.5, 0.9 Hz, 2H), 7.31 (dd, *J* = 11.1, 4.9 Hz, 4H), 7.11 (t, *J* = 7.4 Hz, 1H), 5.57 (tdd, *J* = 22.5, 15.3, 7.0 Hz, 2H), 3.75 (s, 3H), 3.71 (d, *J* = 7.0 Hz, 2H), 3.42 (t, *J* = 7.2 Hz, 1H), 2.71 (t, *J* = 7.0 Hz, 2H), 2.40 (s, 3H). <sup>13</sup>C NMR (101 MHz, CDCl<sub>3</sub>) δ 171.14, 165.44, 144.88, 137.52, 136.51, 135.48, 129.81, 129.00, 128.34, 124.67, 120.04, 119.53, 59.87, 52.88, 52.78, 32.91, 21.64. HRMS (ESI-TOF) Calcd for C<sub>21</sub>H<sub>24</sub>NO<sub>5</sub>S<sup>+</sup> ([M+H]<sup>+</sup>) 402.1370. Found 402.1370.

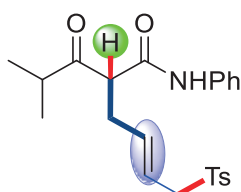

(*E*)-2-Isobutyryl-*N*-phenyl-6-tosylhex-4-enamide (**4a2**). Isolated by flash column chromatography (petroleum ether/ethyl acetate = 3:1, v/v) in 72% yield (148.4 mg), *E/Z* > 20:1, which was detected by <sup>1</sup>H NMR spectroscopy. Pale yellow oil, *R<sub>f</sub>*(petroleum ether/ethyl acetate = 1.5:1, v/v) 0.33. <sup>1</sup>H NMR (400 MHz, CDCl<sub>3</sub>) δ 8.23 (s, 1H), 7.70 (d, *J* = 8.3 Hz, 2H), 7.56 – 7.45 (m, 2H), 7.37 – 7.27 (m, 4H), 7.12 (t, *J* = 7.4 Hz, 1H), 5.69 – 5.41 (m, 2H), 3.71 (dd, *J* = 7.2, 2.5 Hz, 3H), 2.76 (dt, *J* = 13.8, 6.9 Hz, 1H), 2.71 – 2.57 (m, 2H), 2.43 (s, 3H), 1.13 (d, *J* = 6.9 Hz, 3H), 1.10 (d, *J* = 6.8 Hz, 3H). <sup>13</sup>C NMR (101 MHz, CDCl<sub>3</sub>) δ 212.97, 165.77, 144.86, 137.37, 136.20, 135.65, 129.82, 129.03, 128.33, 124.70, 119.97, 119.80, 59.83, 58.73, 41.72, 34.53, 21.65, 17.92, 17.63. HRMS (ESI-TOF) Calcd for C<sub>23</sub>H<sub>28</sub>NO<sub>4</sub>S<sup>+</sup> ([M+H]<sup>+</sup>) 414.1734. Found 414.1735.

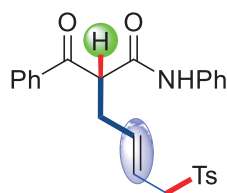

(*E*)-2-Benzoyl-*N*-phenyl-6-tosylhex-4-enamide (**4a3**). Isolated by flash column chromatography (petroleum ether/ethyl acetate = 6:1, v/v) in 76% yield (169.2 mg), *E/Z* > 20:1, which was detected by <sup>1</sup>H NMR spectroscopy. Pale yellow solid, m.p. = 123.0–123.9 °C *R<sub>f</sub>*(petroleum ether/ethyl acetate = 3:1, v/v) 0.33. <sup>1</sup>H NMR (400 MHz, CDCl<sub>3</sub>) δ 8.43 (s, 1H), 8.01 (d, *J* = 7.5 Hz, 2H), 7.63 (dd, *J* = 18.5, 7.8 Hz, 3H), 7.49 (t, *J* = 8.0 Hz, 4H), 7.35 – 7.20 (m, 4H), 7.10 (t, *J* = 7.4 Hz, 1H), 5.57 (tdd, *J* = 22.6, 15.2,

7.0 Hz, 2H), 4.44 (t,  $J = 7.2$  Hz, 1H), 3.68 (d,  $J = 7.1$  Hz, 2H), 2.93 – 2.67 (m, 2H), 2.38 (s, 3H).  $^{13}\text{C}$  NMR (101 MHz,  $\text{CDCl}_3$ )  $\delta$  198.04, 166.07, 144.80, 137.44, 136.25, 135.93, 135.46, 134.31, 129.76, 129.05, 128.99, 128.73, 128.34, 124.69, 120.08, 119.87, 59.83, 55.74, 34.60, 21.63. HRMS (ESI-TOF) Calcd for  $\text{C}_{26}\text{H}_{26}\text{NO}_4\text{S}^+$  ( $[\text{M}+\text{H}]^+$ ) 448.1577. Found 448.1577.

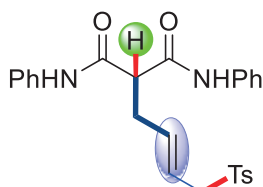

(*E*)- $N^1,N^3$ -Diphenyl-2-(4-tosylbut-2-en-1-yl)malonamide (**4a4**). Isolated by flash column chromatography (petroleum ether/ethyl acetate = 4:1, v/v) in 84% yield (169.2 mg),  $E/Z > 20:1$ , which was detected by  $^1\text{H}$  NMR spectroscopy. White solid, m.p. = 164.7-165.6  $^\circ\text{C}$ .  $R_f$  (petroleum ether/ethyl acetate = 2:1, v/v) 0.33.  $^1\text{H}$  NMR (400 MHz, DMSO)  $\delta$  9.96 (s, 2H), 7.62 (dd,  $J = 19.0, 8.1$  Hz, 6H), 7.31 (dd,  $J = 13.0, 5.0$  Hz, 6H), 7.06 (t,  $J = 7.3$  Hz, 2H), 5.70 – 5.37 (m, 2H), 3.98 (d,  $J = 7.0$  Hz, 2H), 3.52 (t,  $J = 7.3$  Hz, 1H), 2.60 (t,  $J = 6.7$  Hz, 2H), 2.27 (s, 3H).  $^{13}\text{C}$  NMR (101 MHz, DMSO)  $\delta$  167.27, 144.53, 139.40, 137.46, 136.09, 129.99, 129.23, 128.47, 123.94, 119.72, 119.49, 58.87, 54.69, 32.30, 21.43. HRMS (ESI-TOF) Calcd for  $\text{C}_{26}\text{H}_{27}\text{N}_2\text{O}_4\text{S}^+$  ( $[\text{M}+\text{H}]^+$ ) 463.1686. Found 463.1689.

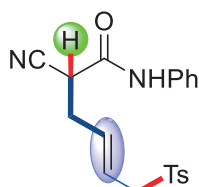

(*E*)-2-Cyano-*N*-phenyl-6-tosylhex-4-enamide (**4a5**). Isolated by flash column chromatography (petroleum ether/ethyl acetate = 2:1, v/v) in 63% yield (116.9 mg),  $E/Z > 20:1$ , which was detected by  $^1\text{H}$  NMR spectroscopy. White solid, m.p. = 164.5-165.4  $^\circ\text{C}$ .  $R_f$  (petroleum ether/ethyl acetate = 1.5:1, v/v) 0.33.  $^1\text{H}$  NMR (400 MHz,  $\text{CDCl}_3$ )  $\delta$  7.91 (s, 1H), 7.75 (d,  $J = 8.3$  Hz, 2H), 7.53 (d,  $J = 7.7$  Hz, 2H), 7.35 (dd,  $J = 17.7, 7.8$  Hz, 4H), 7.19 (t,  $J = 7.4$  Hz, 1H), 5.71 (t,  $J = 4.3$  Hz, 2H), 3.79 (d,  $J = 5.8$  Hz, 2H), 3.59 (t,  $J = 6.5$  Hz, 1H), 2.78 (t,  $J = 6.0$  Hz, 2H), 2.43 (s, 3H).  $^{13}\text{C}$  NMR (101 MHz,  $\text{CDCl}_3$ )  $\delta$  161.47, 145.06, 136.50, 135.39, 134.02, 129.90, 129.19, 128.41, 125.62, 122.13, 120.45, 117.27, 59.79, 39.06, 32.74, 21.66. HRMS (ESI-TOF) Calcd for  $\text{C}_{20}\text{H}_{21}\text{N}_2\text{O}_3\text{S}^+$  ( $[\text{M}+\text{H}]^+$ ) 369.1267. Found 369.1268.

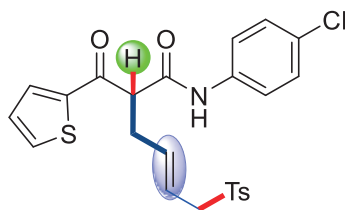

(*E*)-*N*-(4-Chlorophenyl)-2-(thiophene-2-carbonyl)-6-tosylhex-4-enamide (**4b**).

Isolated by flash column chromatography (petroleum ether/ethyl acetate = 4:1, v/v) in 92% yield (224.8 mg), *E/Z* > 20:1, which was detected by <sup>1</sup>H NMR spectroscopy. Yellow solid, m.p. = 145.3-146.2 °C. *R<sub>f</sub>* (petroleum ether/ethyl acetate = 2:1, v/v) 0.33. <sup>1</sup>H NMR (400 MHz, CDCl<sub>3</sub>) δ 8.70 (s, 1H), 7.86 (dd, *J* = 3.9, 0.9 Hz, 1H), 7.77 (dd, *J* = 4.9, 0.9 Hz, 1H), 7.67 (d, *J* = 8.3 Hz, 2H), 7.52 – 7.45 (m, 2H), 7.31 – 7.24 (m, 4H), 7.18 (dd, *J* = 4.8, 4.0 Hz, 1H), 5.71 – 5.58 (m, 1H), 5.58 – 5.41 (m, 1H), 4.26 (t, *J* = 7.2 Hz, 1H), 3.68 (d, *J* = 7.1 Hz, 2H), 2.81 (dtd, *J* = 21.3, 14.3, 7.1 Hz, 2H), 2.42 (s, 3H). <sup>13</sup>C NMR (101 MHz, CDCl<sub>3</sub>) δ 190.73, 165.87, 144.86, 142.96, 136.48, 136.02, 135.81, 135.55, 134.14, 129.80, 129.63, 128.98, 128.92, 128.32, 121.34, 120.12, 59.78, 56.56, 35.27, 21.66. HRMS (ESI-TOF) Calcd for C<sub>24</sub>H<sub>23</sub>ClNO<sub>4</sub>S<sub>2</sub><sup>+</sup> ([M+H]<sup>+</sup>) 488.0752. Found 488.0756.

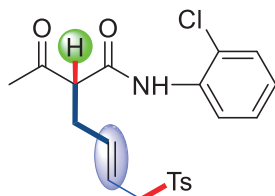

(*E*)-2-Acetyl-*N*-(2-chlorophenyl)-6-tosylhex-4-enamide (**4c1**). Isolated by flash column chromatography (petroleum ether/ethyl acetate = 2:1, v/v) in 62% yield (129.8 mg), *E/Z* > 20:1, which was detected by <sup>1</sup>H NMR spectroscopy. Yellow oil. *R<sub>f</sub>* (petroleum ether/ethyl acetate = 1:1, v/v) 0.33. <sup>1</sup>H NMR (400 MHz, CDCl<sub>3</sub>) δ 8.57 (s, 1H), 8.24 (dd, *J* = 8.2, 1.2 Hz, 1H), 7.69 (t, *J* = 8.4 Hz, 2H), 7.38 (dd, *J* = 8.0, 1.4 Hz, 1H), 7.32 (d, *J* = 8.0 Hz, 2H), 7.29 – 7.25 (m, 1H), 7.07 (td, *J* = 7.9, 1.5 Hz, 1H), 5.66 – 5.46 (m, 2H), 3.72 (d, *J* = 6.2 Hz, 2H), 3.56 (t, *J* = 7.2 Hz, 1H), 2.71 (dd, *J* = 9.4, 4.0 Hz, 2H), 2.43 (s, 3H), 2.29 (s, 3H). <sup>13</sup>C NMR (101 MHz, CDCl<sub>3</sub>) δ 206.07, 165.67, 144.84, 135.66, 135.52, 134.07, 129.79, 129.22, 128.34, 127.66, 125.32, 123.61, 121.97, 120.18, 60.86, 59.80, 33.46, 30.06, 21.63. HRMS (ESI-TOF) Calcd for C<sub>21</sub>H<sub>23</sub>ClNO<sub>4</sub>S<sup>+</sup> ([M+H]<sup>+</sup>) 420.1031. Found 420.1032.

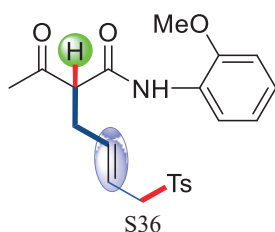

(*E*)-2-Acetyl-*N*-(2-methoxyphenyl)-6-tosylhex-4-enamide (**4c2**). Isolated by flash column chromatography (petroleum ether/ethyl acetate = 3:1, v/v) in 68% yield (141.5 mg), *E/Z* > 20:1, which was detected by <sup>1</sup>H NMR spectroscopy. Pale yellow oil. *R<sub>f</sub>* (petroleum ether/ethyl acetate = 1.5:1, v/v) 0.33. <sup>1</sup>H NMR (400 MHz, CDCl<sub>3</sub>) δ 8.36 (s, 1H), 8.27 (dd, *J* = 8.0, 1.5 Hz, 1H), 7.68 (d, *J* = 8.3 Hz, 2H), 7.29 (d, *J* = 8.0 Hz, 2H), 7.07 (td, *J* = 7.9, 1.6 Hz, 1H), 6.95 (td, *J* = 7.8, 1.2 Hz, 1H), 6.89 (dd, *J* = 8.1, 1.1 Hz, 1H), 5.63 – 5.43 (m, 2H), 3.90 (s, 3H), 3.71 (d, *J* = 6.2 Hz, 2H), 3.48 (t, *J* = 7.3 Hz, 1H), 2.73 – 2.63 (m, 2H), 2.41 (s, 3H), 2.25 (s, 3H). <sup>13</sup>C NMR (101 MHz, CDCl<sub>3</sub>) δ 205.24, 165.31, 148.21, 144.79, 136.23, 135.48, 129.77, 128.36, 127.04, 124.45, 120.98, 119.93, 119.73, 110.10, 61.72, 59.86, 55.84, 32.72, 29.33, 21.61. HRMS (ESI-TOF) Calcd for C<sub>22</sub>H<sub>26</sub>NO<sub>5</sub>S<sup>+</sup> ([M+H]<sup>+</sup>) 416.1526. Found 416.1529.

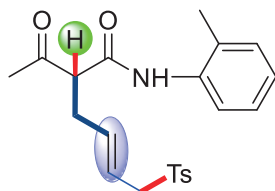

(*E*)-2-Acetyl-*N*-(*o*-tolyl)-6-tosylhex-4-enamide (**4c3**). Isolated by flash column chromatography (petroleum ether/ethyl acetate = 3:1, v/v) in 71% yield (141.2 mg), *E/Z* > 20:1, which was detected by <sup>1</sup>H NMR spectroscopy. White solid, m.p. = 119.1–120.1 °C. *R<sub>f</sub>* (petroleum ether/ethyl acetate = 1.5:1, v/v) 0.33. <sup>1</sup>H NMR (400 MHz, CDCl<sub>3</sub>) δ 8.14 (s, 1H), 7.78 (d, *J* = 8.0 Hz, 1H), 7.69 (d, *J* = 8.3 Hz, 2H), 7.32 (d, *J* = 8.0 Hz, 2H), 7.24 – 7.15 (m, 2H), 7.09 (dd, *J* = 10.7, 4.1 Hz, 1H), 5.58 (tdd, *J* = 22.5, 15.3, 6.9 Hz, 2H), 3.72 (d, *J* = 6.9 Hz, 2H), 3.56 (t, *J* = 7.2 Hz, 1H), 2.77 – 2.63 (m, 2H), 2.43 (s, 3H), 2.29 (s, 3H), 2.25 (s, 3H). <sup>13</sup>C NMR (101 MHz, CDCl<sub>3</sub>) δ 207.33, 165.62, 144.87, 136.00, 135.58, 135.23, 130.58, 129.83, 129.09, 128.33, 126.75, 125.45, 122.63, 119.94, 60.49, 59.82, 33.81, 30.18, 21.64, 17.75. HRMS (ESI-TOF) Calcd for C<sub>22</sub>H<sub>26</sub>NO<sub>4</sub>S<sup>+</sup> ([M+H]<sup>+</sup>) 400.1577. Found 400.1577.

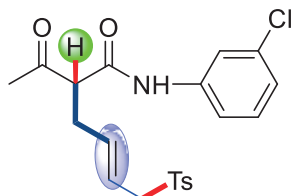

(*E*)-2-Acetyl-*N*-(3-chlorophenyl)-6-tosylhex-4-enamide (**4d1**). Isolated by flash column chromatography (petroleum ether/ethyl acetate = 2:1, v/v) in 80% yield (167.2 mg), *E/Z* > 20:1, which was detected by <sup>1</sup>H NMR spectroscopy. Pale yellow oil. *R<sub>f</sub>* (petroleum ether/ethyl acetate = 1:1.5, v/v) 0.33. <sup>1</sup>H NMR (400 MHz, CDCl<sub>3</sub>) δ 8.35 (s, 1H), 7.77 – 7.57 (m, 3H), 7.37 (dd, *J* = 8.2, 1.1 Hz, 1H), 7.33 (d, *J* = 8.0 Hz, 2H), 7.24

(t,  $J = 8.1$  Hz, 1H), 7.15 – 7.05 (m, 1H), 5.73 – 5.60 (m, 1H), 5.60 – 5.47 (m, 1H), 3.72 (dd,  $J = 7.1, 2.1$  Hz, 2H), 3.50 (t,  $J = 7.2$  Hz, 1H), 2.68 (t,  $J = 7.0$  Hz, 2H), 2.43 (s, 3H), 2.28 (s, 3H).  $^{13}\text{C}$  NMR (101 MHz,  $\text{CDCl}_3$ )  $\delta$  206.07, 166.02, 144.99, 138.55, 136.40, 135.65, 134.68, 130.01, 129.90, 128.25, 124.77, 120.13, 119.74, 117.98, 60.87, 59.84, 33.11, 29.77, 21.65. HRMS (ESI-TOF) Calcd for  $\text{C}_{21}\text{H}_{23}\text{ClNO}_4\text{S}^+$  ( $[\text{M}+\text{H}]^+$ ) 420.1031. Found 420.1030.

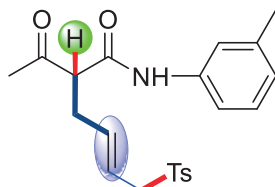

(*E*)-2-Acetyl-*N*-(*m*-tolyl)-6-tosylhex-4-enamide (**4d2**). Isolated by flash column chromatography (petroleum ether/ethyl acetate = 2:1, v/v) in 83% yield (165.1 mg), *E/Z* > 20:1, which was detected by  $^1\text{H}$  NMR spectroscopy. Pale yellow oil.  $R_f$  (petroleum ether/ethyl acetate = 1:1, v/v) 0.33.  $^1\text{H}$  NMR (400 MHz,  $\text{CDCl}_3$ )  $\delta$  8.09 (s, 1H), 7.69 (d,  $J = 8.2$  Hz, 2H), 7.38 (s, 1H), 7.31 (d,  $J = 8.0$  Hz, 3H), 7.20 (t,  $J = 7.8$  Hz, 1H), 6.95 (d,  $J = 7.5$  Hz, 1H), 5.71 – 5.59 (m, 1H), 5.58 – 5.44 (m, 1H), 3.72 (d,  $J = 7.0$  Hz, 2H), 3.47 (t,  $J = 7.3$  Hz, 1H), 2.68 (t,  $J = 7.0$  Hz, 2H), 2.43 (s, 3H), 2.34 (s, 3H), 2.27 (s, 3H).  $^{13}\text{C}$  NMR (101 MHz,  $\text{CDCl}_3$ )  $\delta$  206.10, 165.66, 144.89, 139.01, 137.27, 136.46, 135.62, 129.84, 128.87, 128.31, 125.60, 120.63, 119.65, 117.08, 61.17, 59.87, 33.03, 29.61, 21.64, 21.47. HRMS (ESI-TOF) Calcd for  $\text{C}_{22}\text{H}_{26}\text{NO}_4\text{S}^+$  ( $[\text{M}+\text{H}]^+$ ) 400.1577. Found 400.1575.

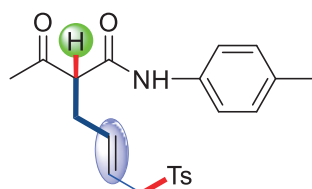

(*E*)-2-Acetyl-*N*-(*p*-tolyl)-6-tosylhex-4-enamide (**4e1**). Isolated by flash column chromatography (petroleum ether/ethyl acetate = 3:1, v/v) in 76% yield (151.4 mg), *E/Z* > 20:1, which was detected by  $^1\text{H}$  NMR spectroscopy. Pale yellow solid, m.p. = 98.7-99.6 °C.  $R_f$  (petroleum ether/ethyl acetate = 1.5:1, v/v) 0.33.  $^1\text{H}$  NMR (400 MHz,  $\text{CDCl}_3$ )  $\delta$  8.11 (s, 1H), 7.69 (d,  $J = 8.3$  Hz, 2H), 7.40 (d,  $J = 8.4$  Hz, 2H), 7.31 (d,  $J = 8.0$  Hz, 2H), 7.12 (d,  $J = 8.2$  Hz, 2H), 5.70 – 5.58 (m, 1H), 5.58 – 5.45 (m, 1H), 3.71 (d,  $J = 7.1$  Hz, 2H), 3.47 (t,  $J = 7.3$  Hz, 1H), 2.67 (t,  $J = 7.0$  Hz, 2H), 2.42 (s, 3H), 2.31 (s, 3H), 2.26 (s, 3H).  $^{13}\text{C}$  NMR (101 MHz,  $\text{CDCl}_3$ )  $\delta$  206.03, 165.65, 144.89, 136.56, 135.59, 134.83, 134.48, 129.85, 129.51, 128.31, 120.09, 119.55, 61.08, 59.87, 32.94,

29.56, 21.64, 20.89. HRMS (ESI-TOF) Calcd for  $C_{22}H_{26}NO_4S^+$  ( $[M+H]^+$ ) 400.1577. Found 400.1577.

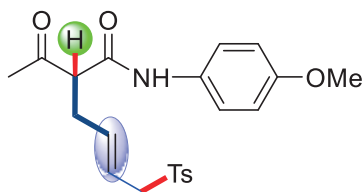

(*E*)-2-Acetyl-*N*-(4-methoxyphenyl)-6-tosylhex-4-enamide (**4e2**). Isolated by flash column chromatography (petroleum ether/ethyl acetate = 2:1, v/v) in 68% yield (141.0 mg), *E/Z* > 20:1, which was detected by  $^1H$  NMR spectroscopy. Pale yellow solid, m.p. = 112.6-112.9 °C.  $R_f$ (petroleum ether/ethyl acetate = 1:1, v/v) 0.33.  $^1H$  NMR (400 MHz,  $CDCl_3$ )  $\delta$  8.10 (s, 1H), 7.69 (d,  $J$  = 8.2 Hz, 2H), 7.46 – 7.39 (m, 2H), 7.31 (d,  $J$  = 8.2 Hz, 2H), 6.91 – 6.79 (m, 2H), 5.71 – 5.58 (m, 1H), 5.58 – 5.45 (m, 1H), 3.78 (s, 3H), 3.72 (d,  $J$  = 7.1 Hz, 2H), 3.47 (t,  $J$  = 7.3 Hz, 1H), 2.67 (t,  $J$  = 7.0 Hz, 2H), 2.43 (s, 3H), 2.26 (s, 3H).  $^{13}C$  NMR (101 MHz,  $CDCl_3$ )  $\delta$  205.98, 165.66, 156.71, 144.91, 136.65, 135.60, 130.51, 129.86, 128.30, 121.86, 119.48, 114.15, 60.95, 59.87, 55.50, 32.89, 29.52, 21.65. HRMS (ESI-TOF) Calcd for  $C_{22}H_{26}NO_5S^+$  ( $[M+H]^+$ ) 416.1526. Found 416.1523.

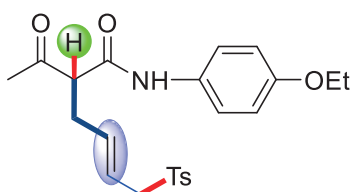

(*E*)-2-Acetyl-*N*-(4-ethoxyphenyl)-6-tosylhex-4-enamide (**4e3**). Isolated by flash column chromatography (petroleum ether/ethyl acetate = 2:1, v/v) in 71% yield (151.5 mg), *E/Z* > 20:1, which was detected by  $^1H$  NMR spectroscopy. Pale yellow solid, m.p. = 131.2-132.2 °C.  $R_f$ (petroleum ether/ethyl acetate = 1:1, v/v) 0.33.  $^1H$  NMR (400 MHz,  $CDCl_3$ )  $\delta$  8.06 (s, 1H), 7.69 (d,  $J$  = 8.3 Hz, 2H), 7.44 – 7.38 (m, 2H), 7.31 (d,  $J$  = 8.1 Hz, 2H), 6.91 – 6.75 (m, 2H), 5.63 (dd,  $J$  = 14.7, 7.5 Hz, 1H), 5.53 (dd,  $J$  = 15.0, 7.6 Hz, 1H), 4.00 (q,  $J$  = 7.0 Hz, 2H), 3.72 (d,  $J$  = 7.1 Hz, 2H), 3.46 (t,  $J$  = 7.3 Hz, 1H), 2.67 (t,  $J$  = 7.0 Hz, 2H), 2.43 (s, 3H), 2.26 (s, 3H), 1.40 (t,  $J$  = 7.0 Hz, 3H).  $^{13}C$  NMR (101 MHz,  $CDCl_3$ )  $\delta$  206.03, 165.58, 156.08, 144.90, 136.63, 135.60, 130.36, 129.85, 128.31, 121.81, 119.51, 114.77, 63.72, 60.98, 59.87, 32.92, 29.54, 21.65, 14.82. HRMS (ESI-TOF) Calcd for  $C_{23}H_{28}NO_5S^+$  ( $[M+H]^+$ ) 430.1683. Found 430.1681.

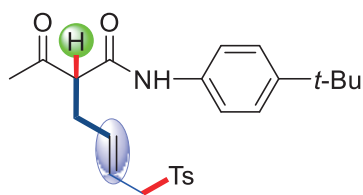

(*E*)-2-Acetyl-*N*-(4-(*tert*-butyl)phenyl)-6-tosylhex-4-enamide (**4e4**). Isolated by flash column chromatography (petroleum ether/ethyl acetate = 2:1, v/v) in 79% yield (173.3 mg), *E/Z* > 20:1, which was detected by <sup>1</sup>H NMR spectroscopy. Pale yellow oil. *R<sub>f</sub>* (petroleum ether/ethyl acetate = 1:1, v/v) 0.33. <sup>1</sup>H NMR (400 MHz, CDCl<sub>3</sub>) δ 8.14 (s, 1H), 7.69 (d, *J* = 8.3 Hz, 2H), 7.48 – 7.41 (m, 2H), 7.37 – 7.28 (m, 4H), 5.62 (dd, *J* = 14.6, 7.6 Hz, 1H), 5.53 (dd, *J* = 14.9, 7.6 Hz, 1H), 3.72 (d, *J* = 7.1 Hz, 2H), 3.48 (t, *J* = 7.3 Hz, 1H), 2.67 (t, *J* = 7.0 Hz, 2H), 2.42 (s, 3H), 2.26 (s, 3H), 1.30 (s, 9H). <sup>13</sup>C NMR (101 MHz, CDCl<sub>3</sub>) δ 205.90, 165.71, 147.83, 144.89, 136.61, 135.58, 134.79, 129.85, 128.31, 125.86, 119.81, 119.53, 61.13, 59.87, 34.42, 32.86, 31.34, 29.48, 21.64. HRMS (ESI-TOF) Calcd for C<sub>25</sub>H<sub>32</sub>NO<sub>4</sub>S<sup>+</sup> ([M+H]<sup>+</sup>) 422.2047. Found 422.2048.

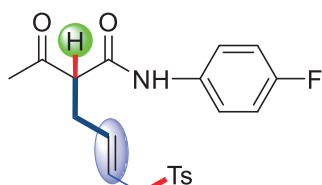

(*E*)-2-Acetyl-*N*-(4-fluorophenyl)-6-tosylhex-4-enamide (**4e5**). Isolated by flash column chromatography (petroleum ether/ethyl acetate = 2:1, v/v) in 77% yield (155.4 mg), *E/Z* > 20:1, which was detected by <sup>1</sup>H NMR spectroscopy. Pale yellow oil. *R<sub>f</sub>* (petroleum ether/ethyl acetate = 1:1, v/v) 0.33. <sup>1</sup>H NMR (400 MHz, CDCl<sub>3</sub>) δ 8.33 (s, 1H), 7.69 (d, *J* = 8.3 Hz, 2H), 7.56 – 7.44 (m, 2H), 7.32 (d, *J* = 8.0 Hz, 2H), 7.07 – 6.93 (m, 2H), 5.74 – 5.61 (m, 1H), 5.59 – 5.46 (m, 1H), 3.72 (d, *J* = 7.3 Hz, 2H), 3.50 (t, *J* = 7.2 Hz, 1H), 2.68 (t, *J* = 7.0 Hz, 2H), 2.43 (s, 3H), 2.27 (s, 3H). <sup>13</sup>C NMR (101 MHz, CDCl<sub>3</sub>) δ 205.96, 165.97, 159.64 (d, *J* = 245.1 Hz), 144.99, 136.64, 135.63, 133.46 (d, *J* = 2.8 Hz), 129.89, 128.25, 121.89 (d, *J* = 8.0 Hz), 119.50, 115.66 (d, *J* = 22.6 Hz), 60.84, 59.84, 32.94, 29.60, 21.65. <sup>19</sup>F NMR (376 MHz, CDCl<sub>3</sub>) δ -117.33. HRMS (ESI-TOF) Calcd for C<sub>21</sub>H<sub>23</sub>FNO<sub>4</sub>S<sup>+</sup> ([M+H]<sup>+</sup>) 404.1326. Found 404.1328.

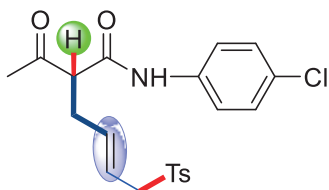

(*E*)-2-Acetyl-*N*-(4-chlorophenyl)-6-tosylhex-4-enamide (**4e6**). Isolated by flash column chromatography (petroleum ether/ethyl acetate = 2:1, v/v) in 80% yield (168.8



mg),  $E/Z > 20:1$ , which was detected by  $^1\text{H}$  NMR spectroscopy. Pale yellow solid, m.p. = 101.4-102.3 °C.  $R_f$ (petroleum ether/ethyl acetate = 1:1, v/v) 0.33.  $^1\text{H}$  NMR (400 MHz,  $\text{CDCl}_3$ )  $\delta$  8.37 (s, 1H), 7.69 (d,  $J = 8.3$  Hz, 2H), 7.54 – 7.47 (m, 2H), 7.32 (d,  $J = 8.0$  Hz, 2H), 7.30 – 7.26 (m, 2H), 5.75 – 5.61 (m, 1H), 5.60 – 5.47 (m, 1H), 3.72 (d,  $J = 7.0$  Hz, 2H), 3.51 (t,  $J = 7.2$  Hz, 1H), 2.68 (t,  $J = 7.1$  Hz, 2H), 2.43 (s, 3H), 2.27 (s, 3H).  $^{13}\text{C}$  NMR (101 MHz,  $\text{CDCl}_3$ )  $\delta$  206.04, 165.99, 145.00, 136.54, 136.02, 135.66, 129.90, 129.72, 129.02, 128.24, 121.31, 119.60, 60.87, 59.83, 33.04, 29.71, 21.66. HRMS (ESI-TOF) Calcd for  $\text{C}_{21}\text{H}_{23}\text{ClNO}_4\text{S}^+$  ( $[\text{M}+\text{H}]^+$ ) 420.1031. Found 420.1033.

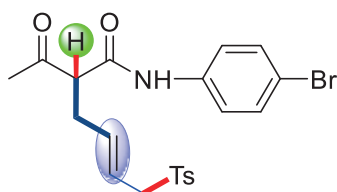

(*E*)-2-acetyl-*N*-(4-bromophenyl)-6-tosylhex-4-enamide (**4e7**). Isolated by flash column chromatography (petroleum ether/ethyl acetate = 2:1, v/v) in 78% yield (181.5 mg),  $E/Z > 20:1$ , which was detected by  $^1\text{H}$  NMR spectroscopy. Pale yellow oil.  $R_f$  (petroleum ether/ethyl acetate = 1:1, v/v) 0.33.  $^1\text{H}$  NMR (400 MHz,  $\text{CDCl}_3$ )  $\delta$  8.34 (s, 1H), 7.69 (d,  $J = 8.3$  Hz, 2H), 7.48 – 7.39 (m, 4H), 7.32 (d,  $J = 8.0$  Hz, 2H), 5.74 – 5.60 (m, 1H), 5.60 – 5.42 (m, 1H), 3.78 – 3.64 (m, 2H), 3.50 (t,  $J = 7.2$  Hz, 1H), 2.69 (t,  $J = 7.1$  Hz, 2H), 2.44 (s, 3H), 2.28 (s, 3H).  $^{13}\text{C}$  NMR (101 MHz,  $\text{CDCl}_3$ )  $\delta$  206.11, 165.94, 144.98, 136.50, 136.47, 135.68, 131.98, 129.89, 128.23, 121.61, 119.65, 117.36, 60.88, 59.81, 33.10, 29.77, 21.65. HRMS (ESI-TOF) Calcd for  $\text{C}_{21}\text{H}_{23}\text{BrNO}_4\text{S}^+$  ( $[\text{M}+\text{H}]^+$ ) 464.0526. Found 464.0524.

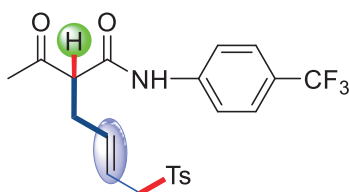

(*E*)-2-Acetyl-6-tosyl-*N*-(4-(trifluoromethyl)phenyl)hex-4-enamide (**4e8**). Isolated by flash column chromatography (petroleum ether/ethyl acetate = 2:1, v/v) in 85% yield (192.8 mg),  $E/Z > 20:1$ , which was detected by  $^1\text{H}$  NMR spectroscopy. Pale yellow solid, m.p. = 123.4-124.2 °C.  $R_f$  (petroleum ether/ethyl acetate = 1:1.5, v/v) 0.33.  $^1\text{H}$  NMR (400 MHz,  $\text{CDCl}_3$ )  $\delta$  8.68 (s, 1H), 7.69 (d,  $J = 8.3$  Hz, 4H), 7.56 (d,  $J = 8.6$  Hz, 2H), 7.32 (d,  $J = 7.9$  Hz, 2H), 5.76 – 5.62 (m, 1H), 5.60 – 5.48 (m, 1H), 3.74 (d,  $J = 7.4$  Hz, 2H), 3.57 (t,  $J = 7.2$  Hz, 1H), 2.70 (t,  $J = 7.0$  Hz, 2H), 2.43 (s, 3H), 2.28 (s, 3H).  $^{13}\text{C}$  NMR (101 MHz,  $\text{CDCl}_3$ )  $\delta$  205.80, 166.47, 145.11, 140.56, 136.61, 135.57, 129.93, 128.20, 126.40 (q,  $J = 32.9$  Hz), 126.22 (q,  $J = 3.6$  Hz), 124.05 (q,  $J = 272.7$  Hz), 119.71,

119.52.  $^{19}\text{F}$  NMR (376 MHz,  $\text{CDCl}_3$ )  $\delta$  -62.16. HRMS (ESI-TOF) Calcd for  $\text{C}_{22}\text{H}_{23}\text{F}_3\text{NO}_4\text{S}^+$  ( $[\text{M}+\text{H}]^+$ ) 454.1294. Found 454.1294.

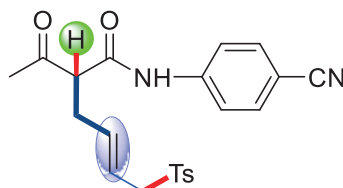

(*E*)-2-Acetyl-*N*-(4-cyanophenyl)-6-tosylhex-4-enamide (**4e9**). Isolated by flash column chromatography (petroleum ether/ethyl acetate = 2:1, v/v) in 77% yield (157.5 mg), *E/Z* > 20:1, which was detected by  $^1\text{H}$  NMR spectroscopy. Pale yellow oil.  $R_f$  (petroleum ether/ethyl acetate = 1:1.5, v/v) 0.33.  $^1\text{H}$  NMR (400 MHz,  $\text{CDCl}_3$ )  $\delta$  8.75 (s, 1H), 7.71 (dd,  $J$  = 11.3, 4.5 Hz, 4H), 7.65 – 7.58 (m, 2H), 7.34 (d,  $J$  = 8.0 Hz, 2H), 5.71 (dt,  $J$  = 14.4, 7.1 Hz, 1H), 5.61 – 5.48 (m, 1H), 3.72 (dd,  $J$  = 7.2, 2.7 Hz, 2H), 3.56 (t,  $J$  = 7.2 Hz, 1H), 2.71 (t,  $J$  = 7.1 Hz, 2H), 2.44 (s, 3H), 2.30 (s, 3H).  $^{13}\text{C}$  NMR (101 MHz,  $\text{CDCl}_3$ )  $\delta$  205.99, 166.53, 145.08, 141.46, 136.39, 135.75, 133.24, 129.94, 128.17, 119.97, 119.76, 118.74, 107.62, 60.78, 59.78, 33.21, 29.89, 21.67. HRMS (ESI-TOF) Calcd for  $\text{C}_{22}\text{H}_{23}\text{N}_2\text{O}_4\text{S}^+$  ( $[\text{M}+\text{H}]^+$ ) 411.1373. Found 411.1376.

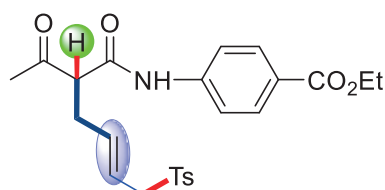

Ethyl (*E*)-4-(2-acetyl-6-tosylhex-4-enamido)benzoate (**4e10**). Isolated by flash column chromatography (petroleum ether/ethyl acetate = 2:1, v/v) in 74% yield (168.1 mg), *E/Z* > 20:1, which was detected by  $^1\text{H}$  NMR spectroscopy. Pale yellow solid, m.p. = 137.0-137.5  $^\circ\text{C}$ .  $R_f$  (petroleum ether/ethyl acetate = 1:1, v/v) 0.33.  $^1\text{H}$  NMR (400 MHz,  $\text{CDCl}_3$ )  $\delta$  8.55 (s, 1H), 8.01 (d,  $J$  = 8.8 Hz, 2H), 7.69 (d,  $J$  = 8.3 Hz, 2H), 7.63 (d,  $J$  = 8.8 Hz, 2H), 7.32 (d,  $J$  = 8.0 Hz, 2H), 5.73 – 5.61 (m, 1H), 5.61 – 5.48 (m, 1H), 4.36 (q,  $J$  = 7.1 Hz, 2H), 3.77 – 3.67 (m, 2H), 3.54 (t,  $J$  = 7.2 Hz, 1H), 2.70 (t,  $J$  = 7.0 Hz, 2H), 2.43 (s, 3H), 2.29 (s, 3H), 1.39 (t,  $J$  = 7.1 Hz, 3H).  $^{13}\text{C}$  NMR (101 MHz,  $\text{CDCl}_3$ )  $\delta$  206.10, 166.14, 166.05, 144.99, 141.46, 136.37, 135.65, 130.76, 129.90, 128.24, 126.43, 119.74, 119.14, 60.95, 59.81, 33.17, 29.83, 21.65, 14.35. HRMS (ESI-TOF) Calcd for  $\text{C}_{24}\text{H}_{28}\text{NO}_6\text{S}^+$  ( $[\text{M}+\text{H}]^+$ ) 458.1632. Found 458.1636.

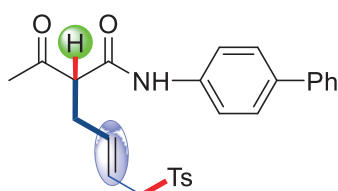

(*E*)-*N*-([1,1'-Biphenyl]-4-yl)-2-acetyl-6-tosylhex-4-enamide (**4e11**). Isolated by flash column chromatography (petroleum ether/ethyl acetate = 3:1, v/v) in 59% yield (135.3 mg), *E/Z* > 20:1, which was detected by <sup>1</sup>H NMR spectroscopy. Pale yellow solid, m.p. = 173.3-173.9 °C. *R<sub>f</sub>* (petroleum ether/ethyl acetate = 1.5:1, v/v) 0.33. <sup>1</sup>H NMR (400 MHz, CDCl<sub>3</sub>) δ 8.30 (s, 1H), 7.73 – 7.67 (m, 2H), 7.64 – 7.59 (m, 2H), 7.59 – 7.53 (m, 4H), 7.43 (t, *J* = 7.6 Hz, 2H), 7.33 (dd, *J* = 10.8, 7.7 Hz, 3H), 5.74 – 5.61 (m, 1H), 5.61 – 5.48 (m, 1H), 3.73 (d, *J* = 7.1 Hz, 2H), 3.52 (t, *J* = 7.3 Hz, 1H), 2.71 (t, *J* = 7.0 Hz, 2H), 2.42 (s, 3H), 2.29 (s, 3H). <sup>13</sup>C NMR (101 MHz, CDCl<sub>3</sub>) δ 206.17, 165.84, 144.95, 140.37, 137.66, 136.67, 136.53, 135.60, 129.88, 128.83, 128.30, 127.65, 127.25, 126.88, 120.34, 119.66, 61.08, 59.86, 33.10, 29.73, 21.67. HRMS (ESI-TOF) Calcd for C<sub>27</sub>H<sub>28</sub>NO<sub>4</sub>S<sup>+</sup> ([M+H]<sup>+</sup>) 462.1734. Found 462.1734.

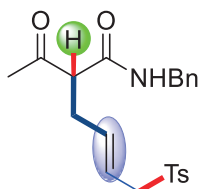

(*E*)-2-Acetyl-*N*-benzyl-6-tosylhex-4-enamide (**4f**). Isolated by flash column chromatography (petroleum ether/ethyl acetate = 2:1, v/v) in 54% yield (106.9 mg), *E/Z* > 20:1, which was detected by <sup>1</sup>H NMR spectroscopy. White solid, m.p. = 105.7-106.7 °C. *R<sub>f</sub>* (petroleum ether/ethyl acetate = 1:1, v/v) 0.33. <sup>1</sup>H NMR (400 MHz, CDCl<sub>3</sub>) δ 7.71 (d, *J* = 8.3 Hz, 2H), 7.35 – 7.24 (m, 7H), 6.46 (s, 1H), 5.51 (tdd, *J* = 22.4, 15.4, 6.9 Hz, 2H), 4.43 (ddd, *J* = 31.5, 14.7, 5.8 Hz, 2H), 3.66 (d, *J* = 6.1 Hz, 2H), 3.34 (t, *J* = 7.3 Hz, 1H), 2.60 (t, *J* = 6.9 Hz, 2H), 2.45 (s, 3H), 2.21 (s, 3H). <sup>13</sup>C NMR (101 MHz, CDCl<sub>3</sub>) δ 205.53, 167.50, 144.86, 137.80, 136.60, 135.69, 129.83, 128.78, 128.33, 127.82, 127.68, 119.46, 99.99, 60.45, 59.86, 43.81, 32.68, 29.42, 21.65. HRMS (ESI-TOF) Calcd for C<sub>22</sub>H<sub>26</sub>NO<sub>4</sub>S<sup>+</sup> ([M+H]<sup>+</sup>) 400.1577. Found 400.1579.

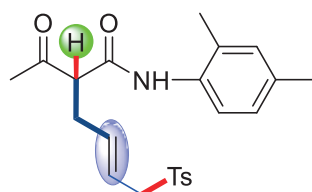

(*E*)-2-Acetyl-*N*-(2,4-dimethylphenyl)-6-tosylhex-4-enamide (**4g1**). Isolated by flash column chromatography (petroleum ether/ethyl acetate = 3:1, v/v) in 69% yield (143.5 mg), *E/Z* > 20:1, which was detected by <sup>1</sup>H NMR spectroscopy. Pale yellow solid, m.p. = 109.1-110.1 °C. *R<sub>f</sub>* (petroleum ether/ethyl acetate = 1.5:1, v/v) 0.33. <sup>1</sup>H NMR (400 MHz, CDCl<sub>3</sub>) δ 8.01 (s, 1H), 7.70 (d, *J* = 8.3 Hz, 2H), 7.58 (d, *J* = 8.7 Hz, 1H), 7.32 (d, *J* = 8.0 Hz, 2H), 7.00 (s, 2H), 5.68 – 5.47 (m, 2H), 3.72 (d, *J* = 6.8 Hz, 2H), 3.54 (t, *J* = 7.2 Hz, 1H), 2.70 (t, *J* = 6.9 Hz, 2H), 2.43 (s, 3H), 2.29 (s, 6H), 2.20 (s, 3H). <sup>13</sup>C NMR (101 MHz, CDCl<sub>3</sub>) δ 207.23, 165.63, 144.88, 136.10, 135.53, 135.31, 132.52, 131.25,

129.84, 129.43, 128.34, 127.24, 122.96, 119.86, 60.51, 59.83, 33.72, 30.12, 21.66, 20.89, 17.71. HRMS (ESI-TOF) Calcd for  $C_{23}H_{28}NO_4S^+$  ( $[M+H]^+$ ) 414.1734. Found 414.1737.

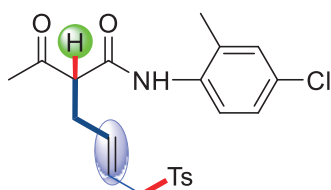

(*E*)-2-Acetyl-*N*-(4-chloro-2-methylphenyl)-6-tosylhex-4-enamide (**4g2**). Isolated by flash column chromatography (petroleum ether/ethyl acetate = 3:1, v/v) in 64% yield (138.5 mg), *E/Z* > 20:1, which was detected by  $^1H$  NMR spectroscopy. Pale yellow oil.  $R_f$  (petroleum ether/ethyl acetate = 1.5:1, v/v) 0.33.  $^1H$  NMR (400 MHz,  $CDCl_3$ )  $\delta$  8.28 (s, 1H), 7.75 (d,  $J$  = 9.0 Hz, 1H), 7.69 (d,  $J$  = 8.3 Hz, 2H), 7.32 (d,  $J$  = 8.0 Hz, 2H), 7.21 – 7.12 (m, 2H), 5.70 – 5.59 (m, 1H), 5.59 – 5.48 (m, 1H), 3.72 (d,  $J$  = 7.0 Hz, 2H), 3.57 (t,  $J$  = 7.2 Hz, 1H), 2.77 – 2.61 (m, 2H), 2.43 (s, 3H), 2.30 (s, 3H), 2.23 (s, 3H).  $^{13}C$  NMR (101 MHz,  $CDCl_3$ )  $\delta$  207.52, 165.79, 144.92, 135.89, 135.64, 133.89, 130.97, 130.32, 129.86, 128.28, 126.66, 123.81, 119.99, 60.16, 59.77, 33.94, 30.31, 21.65, 17.66. HRMS (ESI-TOF) Calcd for  $C_{22}H_{25}ClNO_4S^+$  ( $[M+H]^+$ ) 434.1187. Found 434.1188.

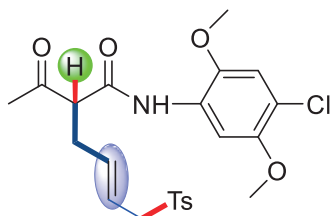

(*E*)-2-Acetyl-*N*-(4-chloro-2,5-dimethoxyphenyl)-6-tosylhex-4-enamide (**4h**). Isolated by flash column chromatography (petroleum ether/ethyl acetate = 3:1, v/v) in 74% yield (178.4 mg), *E/Z* > 20:1, which was detected by  $^1H$  NMR spectroscopy. Pale yellow oil.  $R_f$  (petroleum ether/ethyl acetate = 1.5:1, v/v) 0.33.  $^1H$  NMR (400 MHz,  $CDCl_3$ )  $\delta$  8.44 (s, 1H), 8.15 (s, 1H), 7.75 – 7.64 (m, 2H), 7.31 (d,  $J$  = 7.9 Hz, 2H), 6.91 (s, 1H), 5.67 – 5.47 (m, 2H), 3.87 (s, 3H), 3.87 (s, 3H), 3.72 (d,  $J$  = 6.2 Hz, 2H), 3.50 (t,  $J$  = 7.3 Hz, 1H), 2.74 – 2.63 (m, 2H), 2.43 (s, 3H), 2.27 (s, 3H).  $^{13}C$  NMR (101 MHz,  $CDCl_3$ )  $\delta$  205.29, 165.50, 149.00, 144.85, 142.21, 136.01, 135.57, 129.80, 128.33, 126.31, 119.85, 116.45, 112.38, 105.02, 61.48, 59.82, 56.74, 56.54, 32.91, 29.59, 21.64. HRMS (ESI-TOF) Calcd for  $C_{23}H_{27}ClNO_6S^+$  ( $[M+H]^+$ ) 480.1242. Found 480.1244.

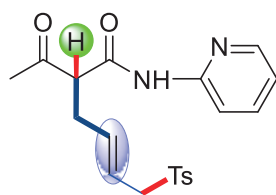

(*E*)-2-Acetyl-*N*-(pyridin-2-yl)-6-tosylhex-4-enamide (**4i**). Isolated by flash column chromatography (petroleum ether/ethyl acetate = 2:1, v/v) in 67% yield (129.4 mg), *E/Z* > 20:1, which was detected by <sup>1</sup>H NMR spectroscopy. Colourless oil. *R<sub>f</sub>*(petroleum ether/ethyl acetate = 1:1, v/v) 0.33. <sup>1</sup>H NMR (400 MHz, CDCl<sub>3</sub>) δ 8.83 (s, 1H), 8.37 – 8.24 (m, 1H), 8.14 (d, *J* = 8.3 Hz, 1H), 7.76 – 7.60 (m, 3H), 7.31 (d, *J* = 8.0 Hz, 2H), 7.08 (ddd, *J* = 7.4, 4.9, 0.9 Hz, 1H), 5.67 – 5.40 (m, 2H), 3.72 (d, *J* = 6.2 Hz, 2H), 3.52 (t, *J* = 7.2 Hz, 1H), 2.76 – 2.58 (m, 2H), 2.42 (s, 3H), 2.26 (s, 3H). <sup>13</sup>C NMR (101 MHz, CDCl<sub>3</sub>) δ 204.40, 166.27, 150.84, 147.98, 144.84, 138.51, 136.05, 135.42, 129.79, 128.38, 120.37, 119.90, 114.21, 61.29, 59.81, 32.50, 29.38, 21.65. HRMS (ESI-TOF) Calcd for C<sub>20</sub>H<sub>23</sub>N<sub>2</sub>O<sub>4</sub>S<sup>+</sup> ([M+H]<sup>+</sup>) 387.1373. Found 387.1374.

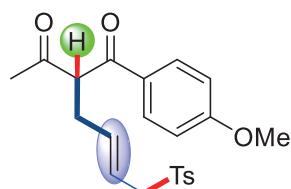

(*E*)-1-(4-Methoxyphenyl)-2-(4-tosylbut-2-en-1-yl)butane-1,3-dione (**4j1**). Isolated by flash column chromatography (petroleum ether/ethyl acetate = 6:1, v/v) in 61% yield (121.5 mg), *E/Z* > 20:1, which was detected by <sup>1</sup>H NMR spectroscopy. Yellow oil. *R<sub>f</sub>* (petroleum ether/ethyl acetate = 3:1, v/v) 0.33. <sup>1</sup>H NMR (400 MHz, CDCl<sub>3</sub>) δ 7.94 (d, *J* = 9.0 Hz, 2H), 7.68 (d, *J* = 8.3 Hz, 2H), 7.32 – 7.27 (m, 2H), 6.97 (d, *J* = 9.0 Hz, 2H), 5.55 – 5.47 (m, 2H), 4.36 (t, *J* = 7.1 Hz, 1H), 3.89 (s, 3H), 3.72 – 3.64 (m, 2H), 2.76 – 2.59 (m, 2H), 2.42 (s, 3H), 2.08 (s, 3H). <sup>13</sup>C NMR (101 MHz, CDCl<sub>3</sub>) δ 203.32, 193.49, 164.26, 144.72, 136.95, 135.40, 131.23, 129.72, 129.07, 128.41, 119.21, 114.19, 62.09, 59.89, 55.63, 31.68, 28.04, 21.65. HRMS (ESI-TOF) Calcd for C<sub>22</sub>H<sub>25</sub>O<sub>5</sub>S<sup>+</sup> ([M+H]<sup>+</sup>) 401.1417. Found 401.1418.

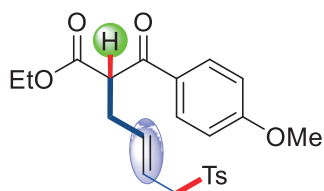

Ethyl (*E*)-2-(4-methoxybenzoyl)-6-tosylhex-4-enoate (**4j2**). Isolated by flash column chromatography (petroleum ether/ethyl acetate = 6:1, v/v) in 70% yield (151.6 mg), *E/Z* > 20:1, which was detected by <sup>1</sup>H NMR spectroscopy. Pale yellow oil. *R<sub>f</sub>*

(petroleum ether/ethyl acetate = 3:1, v/v) 0.33.  $^1\text{H}$  NMR (400 MHz,  $\text{CDCl}_3$ )  $\delta$  8.04 – 7.88 (m, 2H), 7.69 (d,  $J = 8.3$  Hz, 2H), 7.32 – 7.24 (m, 2H), 7.01 – 6.88 (m, 2H), 5.65 – 5.40 (m, 2H), 4.23 (t,  $J = 7.2$  Hz, 1H), 4.18 – 4.05 (m, 2H), 3.89 (s, 3H), 3.69 (d,  $J = 6.3$  Hz, 2H), 2.74 – 2.63 (m, 2H), 2.41 (s, 3H), 1.16 (t,  $J = 7.1$  Hz, 3H).  $^{13}\text{C}$  NMR (101 MHz,  $\text{CDCl}_3$ )  $\delta$  192.23, 169.24, 164.04, 144.67, 137.09, 135.41, 131.08, 129.67, 128.90, 128.45, 119.20, 113.99, 61.59, 59.94, 55.57, 53.26, 31.76, 21.62, 14.01. HRMS (ESI-TOF) Calcd for  $\text{C}_{23}\text{H}_{27}\text{O}_6\text{S}^+$  ( $[\text{M}+\text{H}]^+$ ) 431.1523. Found 431.1524.

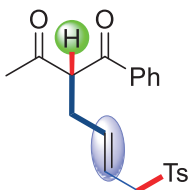

(*E*)-1-Phenyl-2-(4-tosylbut-2-en-1-yl)butane-1,3-dione (**4k1**). Isolated by flash column chromatography (petroleum ether/ethyl acetate = 4:1, v/v) in 66% yield (121.3 mg), *E/Z* > 20:1, which was detected by  $^1\text{H}$  NMR spectroscopy. Yellow oil.  $R_f$  (petroleum ether/ethyl acetate = 2:1, v/v) 0.33.  $^1\text{H}$  NMR (400 MHz,  $\text{CDCl}_3$ )  $\delta$  7.96 – 7.80 (m, 2H), 7.60 (d,  $J = 8.3$  Hz, 2H), 7.58 – 7.52 (m, 1H), 7.43 (t,  $J = 7.7$  Hz, 2H), 7.21 (d,  $J = 8.0$  Hz, 2H), 5.48 – 5.39 (m, 2H), 4.35 (t,  $J = 7.0$  Hz, 1H), 3.67 – 3.56 (m, 2H), 2.69 – 2.54 (m, 2H), 2.34 (s, 3H), 2.03 (s, 3H).  $^{13}\text{C}$  NMR (101 MHz,  $\text{CDCl}_3$ )  $\delta$  201.90, 194.18, 143.70, 135.70, 135.03, 134.40, 132.98, 128.68, 127.99, 127.72, 127.36, 118.38, 61.22, 58.83, 30.59, 27.26, 20.60. HRMS (ESI-TOF) Calcd for  $\text{C}_{21}\text{H}_{23}\text{O}_4\text{S}^+$  ( $[\text{M}+\text{H}]^+$ ) 371.1312. Found 371.1312.

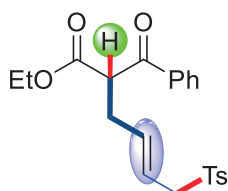

Ethyl (*E*)-2-benzoyl-6-tosylhex-4-enoate (**4k2**). Isolated by flash column chromatography (petroleum ether/ethyl acetate = 6:1, v/v) in 65% yield (131.0 mg), *E/Z* = 12:1, which was detected by  $^1\text{H}$  NMR spectroscopy. Yellow oil.  $R_f$  (petroleum ether/ethyl acetate = 3:1, v/v) 0.33.  $^1\text{H}$  NMR (400 MHz,  $\text{CDCl}_3$ )  $\delta$  7.96 (dd,  $J = 8.3, 1.2$  Hz, 2H), 7.69 (d,  $J = 8.3$  Hz, 2H), 7.64 – 7.58 (m, 1H), 7.49 (t,  $J = 7.7$  Hz, 2H), 7.28 (d,  $J = 7.8$  Hz, 2H), 5.64 – 5.45 (m, 2H), 4.27 (t,  $J = 7.1$  Hz, 1H), 4.12 (qd,  $J = 7.1, 2.9$  Hz, 2H), 3.70 (d,  $J = 6.2$  Hz, 2H), 2.71 (dd,  $J = 9.3, 4.0$  Hz, 2H), 2.40 (s, 3H), 1.15 (t,  $J = 7.1$  Hz, 3H).  $^{13}\text{C}$  NMR (101 MHz,  $\text{CDCl}_3$ )  $\delta$  193.87, 169.02, 144.68, 136.87, 135.91, 135.40, 133.75, 129.67, 128.82, 128.64, 128.44, 119.39, 61.66, 59.90, 53.56, 31.66,

21.61, 13.96. HRMS (ESI-TOF) Calcd for  $C_{22}H_{25}O_5S^+$  ( $[M+H]^+$ ) 401.1417. Found 401.1419.

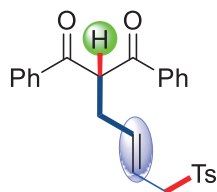

(*E*)-1,3-Diphenyl-2-(4-tosylbut-2-en-1-yl)propane-1,3-dione (**4k3**). Isolated by flash column chromatography (petroleum ether/ethyl acetate = 4:1, v/v) in 85% yield (184.1 mg), *E/Z* > 20:1, which was detected by  $^1H$  NMR spectroscopy. Pale yellow solid, m.p. = 117.9-118.9 °C.  $R_f$ (petroleum ether/ethyl acetate = 2:1, v/v) 0.33.  $^1H$  NMR (400 MHz,  $CDCl_3$ )  $\delta$  7.94 – 7.87 (m, 2H), 7.67 (d,  $J$  = 8.2 Hz, 1H), 7.59 (t,  $J$  = 7.4 Hz, 1H), 7.47 (t,  $J$  = 7.7 Hz, 2H), 7.23 (d,  $J$  = 8.1 Hz, 1H), 5.70 – 5.47 (m, 1H), 5.15 (t,  $J$  = 6.6 Hz, 1H), 3.69 (d,  $J$  = 7.0 Hz, 1H), 2.80 (t,  $J$  = 6.6 Hz, 1H), 2.33 (s, 1H).  $^{13}C$  NMR (101 MHz,  $CDCl_3$ )  $\delta$  195.07, 144.72, 137.48, 135.63, 135.33, 133.79, 129.67, 129.03, 128.58, 128.40, 119.27, 59.87, 56.38, 32.17, 21.56. HRMS (ESI-TOF) Calcd for  $C_{26}H_{25}O_4S^+$  ( $[M+H]^+$ ) 433.1468. Found 433.1469.

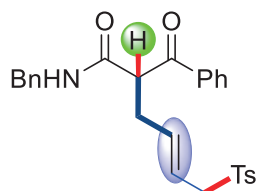

(*E*)-2-Benzoyl-*N*-benzyl-6-tosylhex-4-enamide (**4k4**). Isolated by flash column chromatography (petroleum ether/ethyl acetate = 1:1, v/v) in 59% yield (136.4 mg), *E/Z* > 20:1, which was detected by  $^1H$  NMR spectroscopy. White solid, m.p. = 104.5-105.3 °C.  $R_f$ (petroleum ether/ethyl acetate = 1:2, v/v) 0.33.  $^1H$  NMR (400 MHz,  $CDCl_3$ )  $\delta$  7.97 (dd,  $J$  = 8.4, 1.2 Hz, 2H), 7.69 – 7.64 (m, 2H), 7.64 – 7.59 (m, 1H), 7.48 (t,  $J$  = 7.7 Hz, 2H), 7.31 – 7.22 (m, 5H), 7.13 (dd,  $J$  = 7.4, 2.0 Hz, 2H), 6.67 (s, 1H), 5.60 – 5.39 (m, 2H), 4.45 (dd,  $J$  = 14.8, 6.1 Hz, 1H), 4.35 – 4.26 (m, 2H), 3.63 (d,  $J$  = 6.6 Hz, 2H), 2.77 (dt,  $J$  = 14.1, 7.1 Hz, 1H), 2.71 – 2.60 (m, 1H), 2.40 (s, 3H).  $^{13}C$  NMR (101 MHz,  $CDCl_3$ )  $\delta$  197.48, 167.84, 144.76, 137.84, 136.53, 136.02, 135.49, 134.10, 129.74, 128.97, 128.68, 128.35, 127.65, 127.53, 119.63, 59.83, 55.24, 43.66, 33.99, 21.65. HRMS (ESI-TOF) Calcd for  $C_{27}H_{28}NO_4S^+$  ( $[M+H]^+$ ) 462.1734. Found 462.1738.

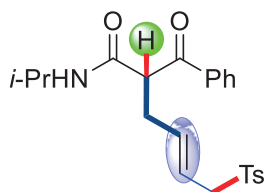

(*E*)-2-Benzoyl-*N*-isopropyl-6-tosylhex-4-enamide (**4k5**). Isolated by flash column chromatography (petroleum ether/ethyl acetate = 2:1, v/v) in 70% yield (144.3 mg), *E/Z* > 20:1, which was detected by <sup>1</sup>H NMR spectroscopy. Yellow oil. *R<sub>f</sub>* (petroleum ether/ethyl acetate = 1:1, v/v) 0.33. <sup>1</sup>H NMR (400 MHz, CDCl<sub>3</sub>) δ 8.03 – 7.92 (m, 2H), 7.68 (d, *J* = 8.3 Hz, 2H), 7.64 – 7.58 (m, 1H), 7.48 (dd, *J* = 10.6, 4.9 Hz, 2H), 7.28 (d, *J* = 8.0 Hz, 2H), 6.12 (d, *J* = 7.9 Hz, 1H), 5.52 (q, *J* = 6.0 Hz, 2H), 4.23 (t, *J* = 7.3 Hz, 1H), 4.04 – 3.93 (m, 1H), 3.68 (d, *J* = 6.1 Hz, 2H), 2.80 – 2.68 (m, 1H), 2.62 (dt, *J* = 12.9, 6.2 Hz, 1H), 2.40 (s, 3H), 1.10 (d, *J* = 6.6 Hz, 3H), 1.04 (d, *J* = 6.6 Hz, 3H). <sup>13</sup>C NMR (101 MHz, CDCl<sub>3</sub>) δ 197.76, 166.98, 144.74, 136.70, 136.10, 135.43, 134.01, 129.73, 128.90, 128.61, 128.36, 119.39, 59.85, 55.49, 41.75, 34.06, 22.52, 22.35, 21.64. HRMS (ESI-TOF) Calcd for C<sub>23</sub>H<sub>28</sub>NO<sub>4</sub>S<sup>+</sup> ([M+H]<sup>+</sup>) 414.1734. Found 414.1735.

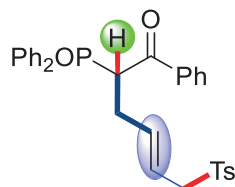

(*E*)-2-(Diphenylphosphoryl)-1-phenyl-6-tosylhex-4-en-1-one (**4l**). Isolated by flash column chromatography (petroleum ether/ethyl acetate = 2:1, v/v) in 24% yield (62.5 mg), *E/Z* > 20:1, which was detected by <sup>1</sup>H NMR spectroscopy. Pale yellow solid, m.p. = 178.4-179.3 °C. *R<sub>f</sub>* (petroleum ether/ethyl acetate = 1:1, v/v) 0.33. <sup>1</sup>H NMR (400 MHz, DMSO) δ 8.00 – 7.87 (m, 2H), 7.82 – 7.72 (m, 2H), 7.68 – 7.44 (m, 8H), 7.38 (td, *J* = 7.4, 1.3 Hz, 1H), 7.29 (dt, *J* = 7.3, 5.4 Hz, 4H), 7.22 (d, *J* = 8.0 Hz, 2H), 5.58 – 5.40 (m, 1H), 5.36 – 5.18 (m, 1H), 5.09 (td, *J* = 12.1, 2.5 Hz, 1H), 3.84 (d, *J* = 7.3 Hz, 2H), 2.91 – 2.73 (m, 1H), 2.30 (s, 3H), 2.28 – 2.16 (m, 1H). <sup>13</sup>C NMR (101 MHz, DMSO) δ 196.07 (d, *J<sub>C-P</sub>* = 3.7 Hz), 144.47, 138.19, 136.76 (d, *J<sub>C-P</sub>* = 14.3 Hz), 135.91, 133.44, 132.62 (d, *J<sub>C-P</sub>* = 2.4 Hz), 132.26 (d, *J<sub>C-P</sub>* = 2.5 Hz), 131.74 (d, *J<sub>C-P</sub>* = 9.9 Hz), 131.60 (d, *J<sub>C-P</sub>* = 98.7 Hz), 131.58 (d, *J<sub>C-P</sub>* = 98.7 Hz), 131.38 (d, *J<sub>C-P</sub>* = 9.6 Hz), 129.93, 129.23 (d, *J<sub>C-P</sub>* = 11.7 Hz), 128.94, 128.73 (d, *J<sub>C-P</sub>* = 11.9 Hz), 128.61, 128.37, 119.62, 58.77, 48.63 (d, *J<sub>C-P</sub>* = 55.5 Hz), 30.39, 21.49. <sup>31</sup>P NMR (162 MHz, DMSO) δ 27.91. HRMS (ESI-TOF) Calcd for C<sub>31</sub>H<sub>30</sub>O<sub>4</sub>PS<sup>+</sup> ([M+H]<sup>+</sup>) 529.1597. Found 529.1599.

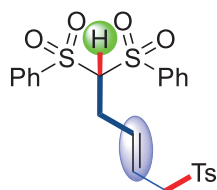

(*E*)-(5-Tosylpent-3-ene-1,1-diylldisulfonyl)dibenzene (**4m**). Isolated by flash column chromatography (petroleum ether/ethyl acetate = 1.5:1, v/v) in 46% yield (114.7 mg),



$E/Z > 20:1$ , which was detected by  $^1\text{H}$  NMR spectroscopy. Colourless oil.  $R_f$ (petroleum ether/ethyl acetate = 1:1, v/v) 0.33.  $^1\text{H}$  NMR (400 MHz,  $\text{CDCl}_3$ )  $\delta$  7.96 – 7.86 (m, 4H), 7.71 (t,  $J = 8.6$  Hz, 4H), 7.57 (dd,  $J = 11.2, 4.4$  Hz, 4H), 7.34 (d,  $J = 8.0$  Hz, 2H), 5.66 (dt,  $J = 14.1, 6.9$  Hz, 1H), 5.46 (dt,  $J = 14.9, 7.4$  Hz, 1H), 4.42 – 4.32 (m, 1H), 3.68 (d,  $J = 7.3$  Hz, 2H), 2.90 (t,  $J = 6.3$  Hz, 2H), 2.44 (s, 3H).  $^{13}\text{C}$  NMR (101 MHz,  $\text{CDCl}_3$ )  $\delta$  144.98, 137.62, 135.52, 134.82, 134.45, 129.88, 129.60, 129.24, 128.36, 120.91, 82.83, 59.69, 28.75, 21.68. HRMS (ESI-TOF) Calcd for  $\text{C}_{24}\text{H}_{25}\text{O}_6\text{S}_3^+$  ( $[\text{M}+\text{H}]^+$ ) 505.0808. Found 505.0803.

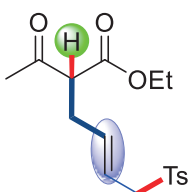

Ethyl (*E*)-2-acetyl-6-tosylhex-4-enoate (**4n**). Isolated by flash column chromatography (petroleum ether/ethyl acetate = 2:1, v/v) in 57% yield (106.9 mg),  $E/Z = 13:1$ , which was detected by  $^1\text{H}$  NMR spectroscopy. White solid. m.p. = 105.7-106.7 °C.  $R_f$  (petroleum ether/ethyl acetate = 1:1, v/v) 0.33.  $^1\text{H}$  NMR (400 MHz,  $\text{CDCl}_3$ )  $\delta$  7.71 (d,  $J = 8.2$  Hz, 2H), 7.35 (d,  $J = 8.1$  Hz, 2H), 5.50 (td,  $J = 5.8, 3.9$  Hz, 2H), 4.27 – 4.09 (m, 2H), 3.75 – 3.67 (m, 2H), 3.44 (t,  $J = 7.3$  Hz, 1H), 2.56 (s, 2H), 2.46 (s, 3H), 2.22 (s, 3H), 1.27 (t,  $J = 7.1$  Hz, 3H).  $^{13}\text{C}$  NMR (101 MHz,  $\text{CDCl}_3$ )  $\delta$  202.00, 168.81, 144.79, 136.64, 135.43, 129.76, 128.44, 119.31, 61.70, 59.89, 58.65, 30.83, 29.37, 21.68, 14.10. HRMS (ESI-TOF) Calcd for  $\text{C}_{17}\text{H}_{23}\text{O}_5\text{S}^+$  ( $[\text{M}+\text{H}]^+$ ) 339.1261. Found 339.1262.

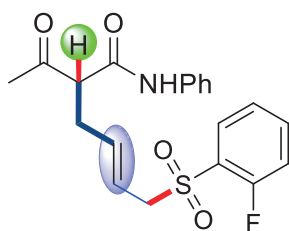

(*E*)-2-Acetyl-6-((2-fluorophenyl)sulfonyl)-*N*-phenylhex-4-enamide (**4o**). Isolated by flash column chromatography (petroleum ether/ethyl acetate = 3:1, v/v) in 89% yield (173.8 mg),  $E/Z > 20:1$ , which was detected by  $^1\text{H}$  NMR spectroscopy. Pale yellow oil.  $R_f$  (petroleum ether/ethyl acetate = 1:1, v/v) 0.33.  $^1\text{H}$  NMR (400 MHz,  $\text{CDCl}_3$ )  $\delta$  8.11 (s, 1H), 7.87 – 7.76 (m, 1H), 7.66 – 7.57 (m, 1H), 7.51 (dd,  $J = 8.5, 0.9$  Hz, 2H), 7.31 (ddd,  $J = 11.6, 7.6, 1.4$  Hz, 3H), 7.25 – 7.18 (m, 1H), 7.14 (t,  $J = 7.4$  Hz, 1H), 5.74 (dt,  $J = 14.3, 7.1$  Hz, 1H), 5.56 (dt,  $J = 14.8, 7.4$  Hz, 1H), 3.96 (d,  $J = 7.4$  Hz, 2H), 3.44 (t,  $J = 7.3$  Hz, 1H), 2.66 (t,  $J = 7.1$  Hz, 2H), 2.24 (s, 3H).  $^{13}\text{C}$  NMR (101 MHz,  $\text{CDCl}_3$ )  $\delta$  206.02, 165.59, 159.42 (d,  $J = 256.4$  Hz), 137.31, 137.03, 136.34 (d,  $J = 8.9$  Hz), 130.81, 129.04, 126.33 (d,  $J = 14.9$  Hz), 124.82 (d,  $J = 3.0$  Hz), 120.01, 118.90, 117.05 (d,  $J =$

30.6 Hz), 61.03, 59.11, 59.08, 32.93, 29.54. HRMS (ESI-TOF) Calcd for  $C_{20}H_{21}FNO_4S^+$  ( $[M+H]^+$ ) 390.1170. Found 390.1172.

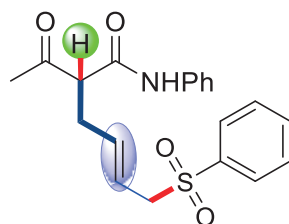

(*E*)-2-Acetyl-*N*-phenyl-6-(phenylsulfonyl)hex-4-enamide (**4p1**). Isolated by flash column chromatography (petroleum ether/ethyl acetate = 2:1, v/v) in 78% yield (145.4 mg), *E/Z* > 20:1, which was detected by  $^1H$  NMR spectroscopy. Yellow oil.  $R_f$  (petroleum ether/ethyl acetate = 1:1, v/v) 0.33.  $^1H$  NMR (400 MHz,  $CDCl_3$ )  $\delta$  8.25 (s, 1H), 7.87 – 7.76 (m, 2H), 7.62 (t,  $J$  = 7.4 Hz, 1H), 7.52 (t,  $J$  = 7.6 Hz, 4H), 7.32 (t,  $J$  = 7.9 Hz, 2H), 7.12 (t,  $J$  = 7.4 Hz, 1H), 5.70 – 5.59 (m, 1H), 5.59 – 5.47 (m, 1H), 3.74 (d,  $J$  = 7.1 Hz, 2H), 3.49 (t,  $J$  = 7.3 Hz, 1H), 2.67 (t,  $J$  = 7.0 Hz, 2H), 2.26 (s, 3H).  $^{13}C$  NMR (101 MHz,  $CDCl_3$ )  $\delta$  205.89, 165.84, 138.48, 137.42, 136.78, 133.88, 129.24, 129.04, 128.28, 124.80, 120.05, 119.32, 61.05, 59.78, 32.87, 29.51. HRMS (ESI-TOF) Calcd for  $C_{20}H_{22}NO_4S^+$  ( $[M+H]^+$ ) 372.1264. Found 372.1266.

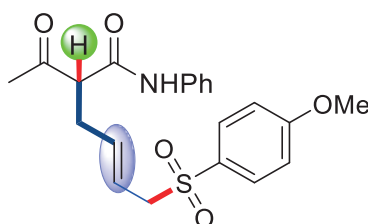

(*E*)-2-Acetyl-6-((4-methoxyphenyl)sulfonyl)-*N*-phenylhex-4-enamide (**4p2**). Isolated by flash column chromatography (petroleum ether/ethyl acetate = 2:1, v/v) in 77% yield (154.1 mg), *E/Z* > 20:1, which was detected by  $^1H$  NMR spectroscopy. Colourless oil.  $R_f$  (petroleum ether/ethyl acetate = 1:1, v/v) 0.33.  $^1H$  NMR (400 MHz,  $CDCl_3$ )  $\delta$  8.19 (s, 1H), 7.73 (d,  $J$  = 8.9 Hz, 2H), 7.57 – 7.48 (m, 2H), 7.33 (dd,  $J$  = 10.8, 5.1 Hz, 2H), 7.13 (t,  $J$  = 7.4 Hz, 1H), 6.97 (d,  $J$  = 8.9 Hz, 2H), 5.58 (dtd,  $J$  = 22.5, 15.3, 7.0 Hz, 2H), 3.86 (s, 3H), 3.71 (d,  $J$  = 6.8 Hz, 2H), 3.48 (t,  $J$  = 7.3 Hz, 1H), 2.68 (t,  $J$  = 7.0 Hz, 2H), 2.28 (s, 3H).  $^{13}C$  NMR (101 MHz,  $CDCl_3$ )  $\delta$  206.07, 165.77, 163.84, 137.39, 136.38, 130.49, 130.04, 129.05, 124.79, 120.03, 119.83, 114.40, 61.11, 60.07, 55.70, 33.01, 29.62. HRMS (ESI-TOF) Calcd for  $C_{21}H_{24}NO_5S^+$  ( $[M+H]^+$ ) 402.1370. Found 402.1371.

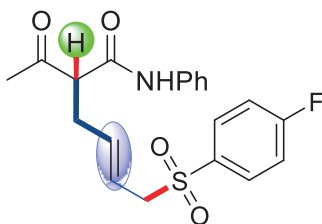

(*E*)-2-Acetyl-6-((4-fluorophenyl)sulfonyl)-*N*-phenylhex-4-enamide (**4p3**). Isolated by flash column chromatography (petroleum ether/ethyl acetate = 2:1, v/v) in 80% yield (156.5 mg), *E/Z* > 20:1, which was detected by  $^1\text{H}$  NMR spectroscopy. Pale yellow oil.  $R_f$  (petroleum ether/ethyl acetate = 1:1, v/v) 0.33.  $^1\text{H}$  NMR (400 MHz,  $\text{CDCl}_3$ )  $\delta$  8.16 (s, 1H), 7.87 – 7.76 (m, 2H), 7.56 – 7.47 (m, 2H), 7.34 (dd,  $J$  = 10.8, 5.1 Hz, 2H), 7.23 – 7.16 (m, 2H), 7.14 (t,  $J$  = 7.4 Hz, 1H), 5.73 – 5.60 (m, 1H), 5.59 – 5.45 (m, 1H), 3.74 (d,  $J$  = 7.2 Hz, 2H), 3.50 (t,  $J$  = 7.2 Hz, 1H), 2.69 (t,  $J$  = 7.1 Hz, 2H), 2.28 (s, 3H).  $^{13}\text{C}$  NMR (101 MHz,  $\text{CDCl}_3$ )  $\delta$  206.07, 165.90 (d,  $J$  = 257.8 Hz), 165.61, 137.32, 136.79, 134.50 (d,  $J$  = 3.1 Hz), 131.22 (d,  $J$  = 9.7 Hz), 129.09, 124.87, 120.01, 119.36, 116.58 (d,  $J$  = 22.7 Hz), 60.98, 59.91, 32.98, 29.59.  $^{19}\text{F}$  NMR (376 MHz,  $\text{CDCl}_3$ )  $\delta$  -103.01. HRMS (ESI-TOF) Calcd for  $\text{C}_{20}\text{H}_{21}\text{FNO}_4\text{S}^+$  ( $[\text{M}+\text{H}]^+$ ) 390.1170. Found 390.1171.

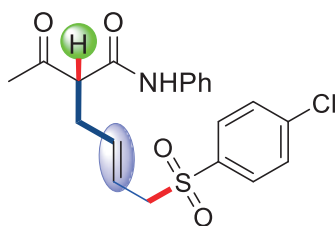

(*E*)-2-Acetyl-6-((4-methoxyphenyl)sulfonyl)-*N*-phenylhex-4-enamide (**4p4**). Isolated by flash column chromatography (petroleum ether/ethyl acetate = 2:1, v/v) in 69% yield (140.3 mg), *E/Z* > 20:1, which was detected by  $^1\text{H}$  NMR spectroscopy. Pale yellow oil.  $R_f$  (petroleum ether/ethyl acetate = 1:1, v/v) 0.33.  $^1\text{H}$  NMR (400 MHz,  $\text{CDCl}_3$ )  $\delta$  8.14 (s, 1H), 7.78 – 7.69 (m, 2H), 7.52 (d,  $J$  = 7.6 Hz, 2H), 7.51 – 7.47 (m, 2H), 7.33 (t,  $J$  = 7.9 Hz, 2H), 7.14 (t,  $J$  = 7.4 Hz, 1H), 5.74 – 5.59 (m, 1H), 5.59 – 5.47 (m, 1H), 3.74 (d,  $J$  = 7.2 Hz, 2H), 3.49 (t,  $J$  = 7.2 Hz, 1H), 2.70 (d,  $J$  = 7.2 Hz, 2H), 2.28 (s, 3H).  $^{13}\text{C}$  NMR (101 MHz,  $\text{CDCl}_3$ )  $\delta$  206.09, 165.56, 140.68, 137.29, 136.90, 136.86, 129.82, 129.57, 129.09, 124.87, 120.00, 119.26, 60.95, 59.81, 33.00, 29.60. HRMS (ESI-TOF) Calcd for  $\text{C}_{20}\text{H}_{21}\text{ClNO}_4\text{S}^+$  ( $[\text{M}+\text{H}]^+$ ) 406.0874. Found 406.0877.

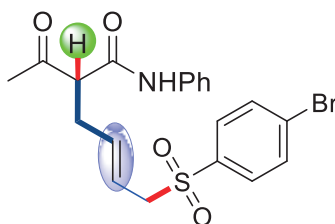

(*E*)-2-Acetyl-6-((4-bromophenyl)sulfonyl)-*N*-phenylhex-4-enamide (**4p5**). Isolated by flash column chromatography (petroleum ether/ethyl acetate = 3:1, v/v) in 75% yield (168.5 mg), *E/Z* > 20:1, which was detected by <sup>1</sup>H NMR spectroscopy. Pale yellow oil. *R<sub>f</sub>*(petroleum ether/ethyl acetate = 1.5:1, v/v) 0.33. <sup>1</sup>H NMR (400 MHz, CDCl<sub>3</sub>) δ 8.18 (s, 1H), 7.71 – 7.61 (m, 4H), 7.56 – 7.48 (m, 2H), 7.33 (t, *J* = 8.0 Hz, 2H), 7.14 (t, *J* = 7.4 Hz, 1H), 5.73 – 5.59 (m, 1H), 5.59 – 5.42 (m, 1H), 3.73 (d, *J* = 7.2 Hz, 2H), 3.49 (t, *J* = 7.2 Hz, 1H), 2.69 (t, *J* = 7.1 Hz, 2H), 2.28 (s, 3H). <sup>13</sup>C NMR (101 MHz, CDCl<sub>3</sub>) δ 206.00, 165.65, 137.43, 137.33, 136.95, 132.58, 129.88, 129.30, 129.10, 124.88, 120.04, 119.18, 60.95, 59.79, 32.94, 29.56. HRMS (ESI-TOF) Calcd for C<sub>20</sub>H<sub>21</sub>BrNO<sub>4</sub>S<sup>+</sup> ([M+H]<sup>+</sup>) 450.0369. Found 450.0371.

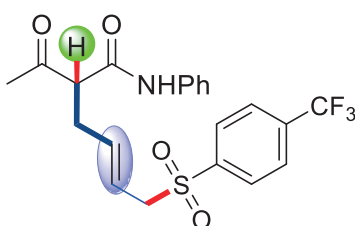

(*E*)-2-Acetyl-*N*-phenyl-6-((4-(trifluoromethyl)phenyl)sulfonyl)hex-4-enamide (**4p6**). Isolated by flash column chromatography (petroleum ether/ethyl acetate = 2:1, v/v) in 72% yield (158.8 mg), *E/Z* > 20:1, which was detected by <sup>1</sup>H NMR spectroscopy. White solid, m.p. = 141.2-141.4 °C. *R<sub>f</sub>*(petroleum ether/ethyl acetate = 1:1.2, v/v) 0.33. <sup>1</sup>H NMR (400 MHz, CDCl<sub>3</sub>) δ 8.09 (s, 1H), 7.96 (d, *J* = 8.2 Hz, 2H), 7.79 (d, *J* = 8.2 Hz, 2H), 7.52 (dd, *J* = 8.6, 1.0 Hz, 2H), 7.34 (t, *J* = 8.0 Hz, 2H), 7.18 – 7.08 (m, 1H), 5.77 – 5.62 (m, 1H), 5.61 – 5.48 (m, 1H), 3.77 (d, *J* = 7.2 Hz, 2H), 3.50 (t, *J* = 7.2 Hz, 1H), 2.71 (t, *J* = 7.1 Hz, 2H), 2.29 (s, 3H). <sup>13</sup>C NMR (101 MHz, CDCl<sub>3</sub>) δ 206.17, 165.42, 141.96, 137.23, 137.11, 135.58 (q, *J* = 33.3 Hz), 129.10, 129.01, 126.38 (q, *J* = 3.6 Hz), 124.90, 123.09 (q, *J* = 274.2 Hz), 119.96, 118.97, 60.87, 59.66, 33.08, 29.67. HRMS (ESI-TOF) Calcd for C<sub>21</sub>H<sub>21</sub>F<sub>3</sub>NO<sub>4</sub>S<sup>+</sup> ([M+H]<sup>+</sup>) 440.1138. Found 440.1139.

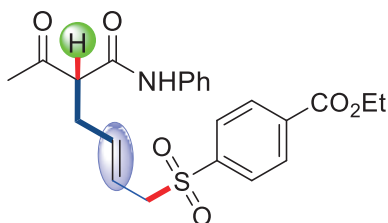

Ethyl (*E*)-4-((6-oxo-5-(phenylcarbamoyl)hept-2-en-1-yl)sulfonyl)benzoate (**4p7**). Isolated by flash column chromatography (petroleum ether/ethyl acetate = 2:1, v/v) in 69% yield (153.4 mg), *E/Z* > 20:1, which was detected by <sup>1</sup>H NMR spectroscopy. Pale yellow solid, m.p. = 109.1-109.9 °C. *R<sub>f</sub>*(petroleum ether/ethyl acetate = 1:1.5, v/v) 0.33. <sup>1</sup>H NMR (400 MHz, CDCl<sub>3</sub>) δ 8.33 (s, 1H), 8.21 – 8.12 (m, 2H), 7.94 – 7.83 (m, 2H),

7.52 (d,  $J = 7.7$  Hz, 2H), 7.31 (t,  $J = 7.9$  Hz, 2H), 7.12 (t,  $J = 7.4$  Hz, 1H), 5.72 – 5.58 (m, 1H), 5.58 – 5.43 (m, 1H), 4.42 (q,  $J = 7.1$  Hz, 2H), 3.76 (d,  $J = 7.2$  Hz, 2H), 3.48 (t,  $J = 7.2$  Hz, 1H), 2.67 (dd,  $J = 11.3, 4.6$  Hz, 2H), 2.26 (s, 3H), 1.42 (t,  $J = 7.1$  Hz, 3H).  $^{13}\text{C}$  NMR (101 MHz,  $\text{CDCl}_3$ )  $\delta$  205.64, 165.85, 165.02, 142.07, 137.41, 137.25, 135.37, 130.30, 129.04, 128.42, 124.83, 120.08, 118.85, 61.91, 60.96, 59.68, 32.70, 29.31, 14.26. HRMS (ESI-TOF) Calcd for  $\text{C}_{23}\text{H}_{26}\text{NO}_6\text{S}^+$  ( $[\text{M}+\text{H}]^+$ ) 444.1475. Found 444.1478.

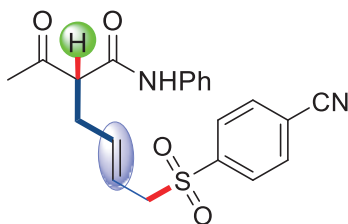

(*E*)-2-Acetyl-6-((4-cyanophenyl)sulfonyl)-*N*-phenylhex-4-enamide (**4p8**). Isolated by flash column chromatography (petroleum ether/ethyl acetate = 2:1, v/v) in 81% yield (161.1 mg), *E/Z* > 20:1, which was detected by  $^1\text{H}$  NMR spectroscopy. Pale yellow solid, m.p. = 111.4-112.3 °C.  $R_f$  (petroleum ether/ethyl acetate = 1:1.5, v/v) 0.33.  $^1\text{H}$  NMR (400 MHz,  $\text{CDCl}_3$ )  $\delta$  8.21 (s, 1H), 7.98 – 7.87 (m, 2H), 7.83 – 7.71 (m, 2H), 7.59 – 7.46 (m, 2H), 7.34 (dd,  $J = 10.8, 5.1$  Hz, 2H), 7.15 (t,  $J = 7.4$  Hz, 1H), 5.79 – 5.60 (m, 1H), 5.59 – 5.44 (m, 1H), 3.77 (d,  $J = 7.3$  Hz, 2H), 3.51 (t,  $J = 7.2$  Hz, 1H), 2.81 – 2.56 (m, 2H), 2.29 (s, 3H).  $^{13}\text{C}$  NMR (101 MHz,  $\text{CDCl}_3$ )  $\delta$  205.81, 165.58, 142.44, 137.44, 137.31, 133.00, 129.15, 129.11, 124.99, 120.05, 118.63, 117.66, 117.08, 60.81, 59.59, 32.75, 29.40. HRMS (ESI-TOF) Calcd for  $\text{C}_{21}\text{H}_{21}\text{N}_2\text{O}_4\text{S}^+$  ( $[\text{M}+\text{H}]^+$ ) 397.1217. Found 397.1217.

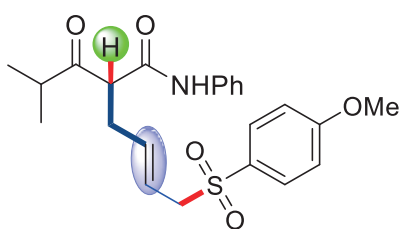

(*E*)-2-Isobutyryl-6-((4-methoxyphenyl)sulfonyl)-*N*-phenylhex-4-enamide (**4q**). Isolated by flash column chromatography (petroleum ether/ethyl acetate = 2:1, v/v) in 88% yield (189.6 mg), *E/Z* > 20:1, which was detected by  $^1\text{H}$  NMR spectroscopy. Yellow oil.  $R_f$  (petroleum ether/ethyl acetate = 1:1, v/v) 0.33.  $^1\text{H}$  NMR (400 MHz,  $\text{CDCl}_3$ )  $\delta$  8.29 (s, 1H), 7.77 – 7.71 (m, 2H), 7.56 – 7.47 (m, 2H), 7.32 (t,  $J = 8.0$  Hz, 2H), 7.12 (t,  $J = 7.4$  Hz, 1H), 6.97 (d,  $J = 8.9$  Hz, 2H), 5.69 – 5.42 (m, 2H), 3.86 (s, 3H), 3.69 (t,  $J = 6.7$  Hz, 3H), 2.77 (dt,  $J = 13.8, 6.9$  Hz, 1H), 2.65 (t,  $J = 6.8$  Hz, 2H), 1.13 (d,  $J = 6.9$  Hz, 3H), 1.10 (d,  $J = 6.8$  Hz, 3H).  $^{13}\text{C}$  NMR (101 MHz,  $\text{CDCl}_3$ )  $\delta$  212.77,

165.86, 163.83, 137.41, 136.19, 130.50, 130.07, 129.03, 124.69, 119.99, 119.90, 114.38, 60.04, 58.75, 55.70, 41.59, 34.37, 17.94, 17.71. HRMS (ESI-TOF) Calcd for  $C_{23}H_{28}NO_5S^+$  ( $[M+H]^+$ ) 430.1683. Found 430.1683.

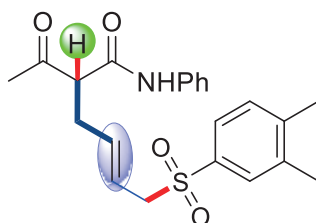

*(E)*-2-Acetyl-6-((3,4-dimethylphenyl)sulfonyl)-*N*-phenylhex-4-enamide (**4r1**).

Isolated by flash column chromatography (petroleum ether/ethyl acetate = 2:1, v/v) in 64% yield (127.9 mg), *E/Z* > 20:1, which was detected by  $^1H$  NMR spectroscopy. Yellow oil.  $R_f$  (petroleum ether/ethyl acetate = 1:1, v/v) 0.33.  $^1H$  NMR (400 MHz,  $CDCl_3$ )  $\delta$  8.19 (s, 1H), 7.58 (d,  $J$  = 1.5 Hz, 1H), 7.57 – 7.45 (m, 3H), 7.33 (dd,  $J$  = 10.8, 5.1 Hz, 2H), 7.26 (d,  $J$  = 7.4 Hz, 1H), 7.13 (t,  $J$  = 7.4 Hz, 1H), 5.73 – 5.61 (m, 1H), 5.60 – 5.45 (m, 1H), 3.78 – 3.64 (m, 2H), 3.49 (t,  $J$  = 7.3 Hz, 1H), 2.69 (t,  $J$  = 7.0 Hz, 2H), 2.33 (s, 6H), 2.28 (s, 3H).  $^{13}C$  NMR (101 MHz,  $CDCl_3$ )  $\delta$  206.18, 165.79, 143.61, 138.13, 137.35, 136.43, 135.80, 130.30, 129.04, 128.89, 125.81, 124.78, 120.04, 119.67, 61.10, 59.85, 33.13, 29.73, 20.04, 19.79. HRMS (ESI-TOF) Calcd for  $C_{22}H_{26}NO_4S^+$  ( $[M+H]^+$ ) 400.1577. Found 400.1578.

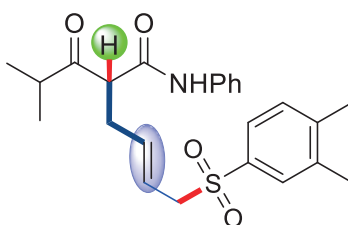

*(E)*-6-((3,4-Dimethylphenyl)sulfonyl)-2-isobutyryl-*N*-phenylhex-4-enamide (**4r2**).

Isolated by flash column chromatography (petroleum ether/ethyl acetate = 3:1, v/v) in 62% yield (132.3 mg), *E/Z* > 20:1, which was detected by  $^1H$  NMR spectroscopy. Yellow oil.  $R_f$  (petroleum ether/ethyl acetate = 1.5:1, v/v) 0.33.  $^1H$  NMR (400 MHz,  $CDCl_3$ )  $\delta$  8.26 (s, 1H), 7.58 (s, 1H), 7.56 – 7.46 (m, 3H), 7.32 (t,  $J$  = 7.9 Hz, 2H), 7.26 (d,  $J$  = 7.4 Hz, 1H), 7.12 (t,  $J$  = 7.4 Hz, 1H), 5.70 – 5.57 (m, 1H), 5.57 – 5.44 (m, 1H), 3.69 (t,  $J$  = 7.1 Hz, 3H), 2.76 (dt,  $J$  = 13.8, 6.9 Hz, 1H), 2.65 (dd,  $J$  = 12.0, 6.8 Hz, 2H), 2.33 (d,  $J$  = 1.3 Hz, 6H), 1.13 (d,  $J$  = 6.9 Hz, 3H), 1.10 (d,  $J$  = 6.8 Hz, 3H).  $^{13}C$  NMR (101 MHz,  $CDCl_3$ )  $\delta$  212.90, 165.86, 143.57, 138.10, 137.38, 136.21, 135.84, 130.29, 129.02, 128.93, 125.85, 124.68, 119.99, 119.79, 59.83, 58.77, 41.72, 34.50, 20.04, 19.79, 17.92, 17.64. HRMS (ESI-TOF) Calcd for  $C_{24}H_{30}NO_4S^+$  ( $[M+H]^+$ ) 428.1890. Found 428.1890.

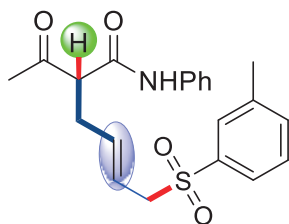

(*E*)-2-Acetyl-*N*-phenyl-6-(*m*-tolylsulfonyl)hex-4-enamide (**4s1**). Isolated by flash column chromatography (petroleum ether/ethyl acetate = 2:1, v/v) in 72% yield (138.1 mg), *E/Z* > 20:1, which was detected by <sup>1</sup>H NMR spectroscopy. Yellow oil. *R*<sub>f</sub> (petroleum ether/ethyl acetate = 1:1, v/v) 0.33. <sup>1</sup>H NMR (400 MHz, CDCl<sub>3</sub>) δ 8.20 (s, 1H), 7.64 (s, 1H), 7.63 – 7.58 (m, 1H), 7.56 – 7.48 (m, 2H), 7.46 – 7.37 (m, 2H), 7.33 (dd, *J* = 10.8, 5.1 Hz, 2H), 7.13 (t, *J* = 7.4 Hz, 1H), 5.75 – 5.61 (m, 1H), 5.61 – 5.46 (m, 1H), 3.73 (d, *J* = 6.9 Hz, 2H), 3.49 (t, *J* = 7.3 Hz, 1H), 2.69 (t, *J* = 7.0 Hz, 2H), 2.43 (s, 3H), 2.27 (s, 3H). <sup>13</sup>C NMR (101 MHz, CDCl<sub>3</sub>) δ 206.06, 165.81, 139.62, 138.43, 137.37, 136.67, 134.67, 129.08, 129.04, 128.48, 125.43, 124.80, 120.06, 119.42, 61.08, 59.77, 33.03, 29.66, 21.32. HRMS (ESI-TOF) Calcd for C<sub>21</sub>H<sub>24</sub>NO<sub>4</sub>S<sup>+</sup> ([M+H]<sup>+</sup>) 386.1421. Found 386.1423.

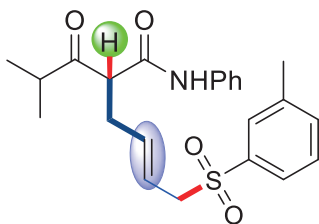

(*E*)-2-Isobutyryl-*N*-phenyl-6-(*m*-tolylsulfonyl)hex-4-enamide (**4s1**). Isolated by flash column chromatography (petroleum ether/ethyl acetate = 3:1, v/v) in 72% yield (149.5 mg), *E/Z* > 20:1, which was detected by <sup>1</sup>H NMR spectroscopy. Yellow oil. *R*<sub>f</sub> (petroleum ether/ethyl acetate = 1.5:1, v/v) 0.33. <sup>1</sup>H NMR (400 MHz, CDCl<sub>3</sub>) δ 8.29 (s, 1H), 7.64 (s, 1H), 7.62 (d, *J* = 7.1 Hz, 1H), 7.51 (d, *J* = 7.7 Hz, 2H), 7.46 – 7.37 (m, 2H), 7.31 (t, *J* = 7.9 Hz, 2H), 7.11 (t, *J* = 7.4 Hz, 1H), 5.70 – 5.57 (m, 1H), 5.57 – 5.45 (m, 1H), 3.70 (dd, *J* = 14.1, 7.1 Hz, 3H), 2.76 (dt, *J* = 13.8, 6.9 Hz, 1H), 2.72 – 2.56 (m, 2H), 2.43 (s, 3H), 1.12 (d, *J* = 6.9 Hz, 3H), 1.10 (d, *J* = 6.8 Hz, 3H). <sup>13</sup>C NMR (101 MHz, CDCl<sub>3</sub>) δ 212.69, 165.88, 139.58, 138.45, 137.40, 136.47, 134.65, 129.05, 129.01, 128.51, 125.44, 124.69, 120.01, 119.51, 59.74, 58.73, 41.58, 34.34, 21.32, 17.95, 17.72. HRMS (ESI-TOF) Calcd for C<sub>23</sub>H<sub>28</sub>NO<sub>4</sub>S<sup>+</sup> ([M+H]<sup>+</sup>) 414.1734. Found 414.1736.

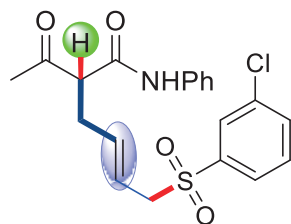

(*E*)-2-Acetyl-6-((3-chlorophenyl)sulfonyl)-*N*-phenylhex-4-enamide (**4t1**). Isolated by flash column chromatography (petroleum ether/ethyl acetate = 2.5:1, v/v) in 78% yield (157.3 mg), *E/Z* > 20:1, which was detected by <sup>1</sup>H NMR spectroscopy. Yellow oil. *R<sub>f</sub>* (petroleum ether/ethyl acetate = 1:1, v/v) 0.33. <sup>1</sup>H NMR (400 MHz, CDCl<sub>3</sub>) δ 8.11 (s, 1H), 7.84 (t, *J* = 1.8 Hz, 1H), 7.73 – 7.67 (m, 1H), 7.59 (ddd, *J* = 8.0, 2.0, 1.0 Hz, 1H), 7.52 (dd, *J* = 8.5, 0.9 Hz, 2H), 7.46 (t, *J* = 7.9 Hz, 1H), 7.34 (dd, *J* = 10.8, 5.2 Hz, 2H), 7.14 (t, *J* = 7.4 Hz, 1H), 5.71 – 5.61 (m, 1H), 5.59 – 5.49 (m, 1H), 3.75 (d, *J* = 6.8 Hz, 2H), 3.48 (t, *J* = 7.3 Hz, 1H), 2.70 (t, *J* = 7.1 Hz, 2H), 2.29 (s, 3H). <sup>13</sup>C NMR (101 MHz, CDCl<sub>3</sub>) δ 206.08, 165.52, 140.16, 137.28, 137.10, 135.48, 134.05, 130.59, 129.08, 128.41, 126.52, 124.87, 120.00, 119.09, 61.02, 59.75, 33.03, 29.61. HRMS (ESI-TOF) Calcd for C<sub>20</sub>H<sub>21</sub>ClNO<sub>4</sub>S<sup>+</sup> ([M+H]<sup>+</sup>) 406.0874. Found 406.0875.

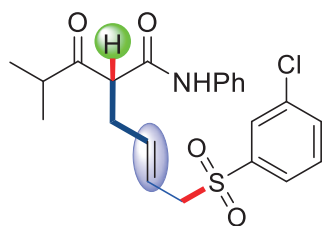

(*E*)-6-((3-Chlorophenyl)sulfonyl)-2-isobutyryl-*N*-phenylhex-4-enamide (**4t2**). Isolated by flash column chromatography (petroleum ether/ethyl acetate = 2:1, v/v) in 87% yield (189.3 mg), *E/Z* > 20:1, which was detected by <sup>1</sup>H NMR spectroscopy. Yellow oil. *R<sub>f</sub>* (petroleum ether/ethyl acetate = 1:1, v/v) 0.33. <sup>1</sup>H NMR (400 MHz, CDCl<sub>3</sub>) δ 8.23 (s, 1H), 7.84 (t, *J* = 1.8 Hz, 1H), 7.71 (dd, *J* = 7.8, 1.3 Hz, 1H), 7.60 (ddd, *J* = 8.0, 1.9, 1.0 Hz, 1H), 7.48 (dd, *J* = 16.6, 8.3 Hz, 3H), 7.32 (t, *J* = 7.9 Hz, 2H), 7.13 (t, *J* = 7.4 Hz, 1H), 5.70 – 5.58 (m, 1H), 5.58 – 5.48 (m, 1H), 3.74 (d, *J* = 7.0 Hz, 2H), 3.69 (t, *J* = 7.4 Hz, 1H), 2.76 (dq, *J* = 14.0, 7.0 Hz, 1H), 2.67 (dd, *J* = 14.5, 8.4 Hz, 2H), 1.14 (d, *J* = 6.9 Hz, 3H), 1.11 (d, *J* = 6.8 Hz, 3H). <sup>13</sup>C NMR (101 MHz, CDCl<sub>3</sub>) δ 212.93, 165.63, 140.20, 137.31, 136.92, 135.48, 134.03, 130.56, 129.06, 128.42, 126.54, 124.75, 119.96, 119.14, 59.72, 58.64, 41.71, 34.46, 17.93, 17.66. HRMS (ESI-TOF) Calcd for C<sub>22</sub>H<sub>25</sub>ClNO<sub>4</sub>S<sup>+</sup> ([M+H]<sup>+</sup>) 434.1187. Found 434.1188.



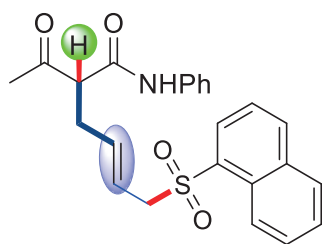

(*E*)-2-Acetyl-6-(naphthalen-1-ylsulfonyl)-*N*-phenylhex-4-enamide (**4u1**). Isolated by flash column chromatography (petroleum ether/ethyl acetate = 2:1, v/v) in 81% yield (171.4 mg), *E/Z* = 20:1, which was detected by <sup>1</sup>H NMR spectroscopy. Pale yellow oil. *R<sub>f</sub>* (petroleum ether/ethyl acetate = 1:1.5, v/v) 0.33. <sup>1</sup>H NMR (400 MHz, CDCl<sub>3</sub>) δ 8.70 (d, *J* = 8.7 Hz, 1H), 8.19 (dd, *J* = 7.3, 1.2 Hz, 1H), 8.11 (d, *J* = 8.0 Hz, 2H), 7.96 (d, *J* = 7.5 Hz, 1H), 7.69 (ddd, *J* = 8.5, 6.9, 1.4 Hz, 1H), 7.65 – 7.59 (m, 1H), 7.59 – 7.53 (m, 1H), 7.53 – 7.47 (m, 2H), 7.33 (dd, *J* = 10.7, 5.2 Hz, 2H), 7.13 (t, *J* = 7.4 Hz, 1H), 5.54 (td, *J* = 5.9, 4.1 Hz, 2H), 3.95 (dd, *J* = 5.5, 2.8 Hz, 2H), 3.36 (t, *J* = 7.3 Hz, 1H), 2.65 – 2.54 (m, 2H), 2.22 (s, 3H). <sup>13</sup>C NMR (101 MHz, CDCl<sub>3</sub>) δ 206.00, 165.69, 137.33, 136.63, 135.38, 134.14, 133.55, 131.14, 129.36, 129.05, 128.89, 128.82, 127.11, 124.80, 124.40, 124.03, 120.03, 119.39, 61.10, 59.38, 32.96, 29.60. HRMS (ESI-TOF) Calcd for C<sub>24</sub>H<sub>24</sub>NO<sub>4</sub>S<sup>+</sup> ([M+H]<sup>+</sup>) 422.1421. Found 422.1421.

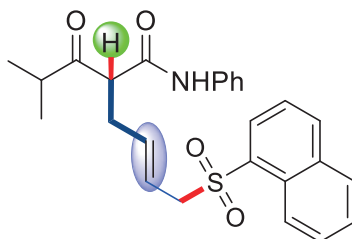

(*E*)-2-Isobutyryl-6-(naphthalen-1-ylsulfonyl)-*N*-phenylhex-4-enamide (**4u2**). Isolated by flash column chromatography (petroleum ether/ethyl acetate = 3:1, v/v) in 81% yield (182.5 mg), *E/Z* = 20:1, which was detected by <sup>1</sup>H NMR spectroscopy. Yellow oil. *R<sub>f</sub>* (petroleum ether/ethyl acetate = 1.5:1, v/v) 0.33. <sup>1</sup>H NMR (400 MHz, CDCl<sub>3</sub>) δ 8.70 (d, *J* = 8.5 Hz, 1H), 8.20 (dd, *J* = 7.3, 1.0 Hz, 2H), 8.10 (d, *J* = 8.2 Hz, 1H), 7.95 (d, *J* = 7.9 Hz, 1H), 7.69 (ddd, *J* = 8.5, 7.0, 1.3 Hz, 1H), 7.65 – 7.59 (m, 1H), 7.59 – 7.52 (m, 1H), 7.48 (d, *J* = 7.7 Hz, 2H), 7.30 (t, *J* = 7.9 Hz, 2H), 7.11 (t, *J* = 7.4 Hz, 1H), 5.57 – 5.43 (m, 2H), 3.99 – 3.87 (m, 2H), 3.58 (t, *J* = 7.4 Hz, 1H), 2.67 (dd, *J* = 13.8, 6.9 Hz, 1H), 2.61 – 2.49 (m, 2H), 1.09 (d, *J* = 6.9 Hz, 3H), 1.04 (d, *J* = 6.8 Hz, 3H). <sup>13</sup>C NMR (101 MHz, CDCl<sub>3</sub>) δ 212.70, 165.79, 137.37, 136.41, 135.35, 134.15, 133.61, 131.15, 129.34, 129.01, 128.92, 128.79, 127.08, 124.68, 124.38, 124.06, 120.00, 119.47, 59.38, 58.74, 41.56, 34.33, 17.92, 17.65. HRMS (ESI-TOF) Calcd for C<sub>26</sub>H<sub>28</sub>NO<sub>4</sub>S<sup>+</sup> ([M+H]<sup>+</sup>) 450.1734. Found 450.1734.

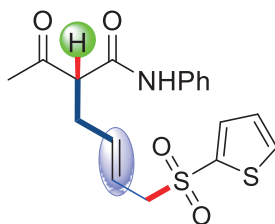

(*E*)-2-Acetyl-*N*-phenyl-6-(thiophen-2-ylsulfonyl)hex-4-enamide (**4v1**). Isolated by flash column chromatography (petroleum ether/ethyl acetate = 2:1, v/v) in 82% yield (155.8 mg), *E/Z* = 20:1, which was detected by  $^1\text{H}$  NMR spectroscopy. Yellow oil. *R<sub>f</sub>* (petroleum ether/ethyl acetate = 1:1.5, v/v) 0.33.  $^1\text{H}$  NMR (400 MHz,  $\text{CDCl}_3$ )  $\delta$  8.28 (s, 1H), 7.66 (dd, *J* = 5.0, 1.3 Hz, 1H), 7.60 (dd, *J* = 3.8, 1.3 Hz, 1H), 7.53 (dd, *J* = 8.5, 0.9 Hz, 2H), 7.32 (dd, *J* = 10.8, 5.1 Hz, 2H), 7.17 – 7.07 (m, 2H), 5.75 – 5.64 (m, 1H), 5.64 – 5.52 (m, 1H), 3.83 (d, *J* = 7.0 Hz, 2H), 3.52 (t, *J* = 7.3 Hz, 1H), 2.70 (td, *J* = 7.0, 3.4 Hz, 2H), 2.28 (s, 3H).  $^{13}\text{C}$  NMR (101 MHz,  $\text{CDCl}_3$ )  $\delta$  205.82, 165.86, 139.16, 137.44, 137.10, 134.59, 134.32, 129.05, 127.96, 124.81, 120.07, 119.36, 61.06, 61.02, 32.80, 29.47. HRMS (ESI-TOF) Calcd for  $\text{C}_{18}\text{H}_{20}\text{NO}_4\text{S}_2^+$  ( $[\text{M}+\text{H}]^+$ ) 378.0828. Found 378.0830.

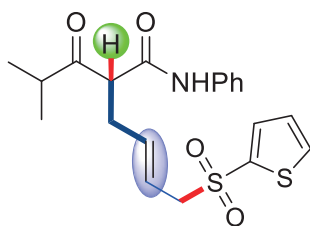

(*E*)-2-Isobutyryl-*N*-phenyl-6-(thiophen-2-ylsulfonyl)hex-4-enamide (**4v2**). Isolated by flash column chromatography (petroleum ether/ethyl acetate = 3:1, v/v) in 87% yield (176.7 mg), *E/Z* > 20:1, which was detected by  $^1\text{H}$  NMR spectroscopy. Yellow oil. *R<sub>f</sub>* (petroleum ether/ethyl acetate = 1.5:1, v/v) 0.33.  $^1\text{H}$  NMR (400 MHz,  $\text{CDCl}_3$ )  $\delta$  8.22 (s, 1H), 7.59 (dd, *J* = 5.0, 1.2 Hz, 1H), 7.54 (dd, *J* = 3.7, 1.2 Hz, 1H), 7.44 (d, *J* = 7.8 Hz, 2H), 7.24 (t, *J* = 7.9 Hz, 2H), 7.09 – 6.99 (m, 2H), 5.65 – 5.44 (m, 2H), 3.75 (d, *J* = 6.9 Hz, 2H), 3.65 (t, *J* = 7.4 Hz, 1H), 2.72 (dt, *J* = 13.8, 6.9 Hz, 1H), 2.60 (t, *J* = 6.9 Hz, 2H), 1.06 (d, *J* = 7.0 Hz, 3H), 1.03 (d, *J* = 6.9 Hz, 3H).  $^{13}\text{C}$  NMR (101 MHz,  $\text{CDCl}_3$ )  $\delta$  212.65, 165.82, 139.25, 137.41, 136.83, 134.57, 134.28, 129.04, 127.93, 124.72, 120.01, 119.53, 60.99, 58.71, 41.53, 34.28, 17.97, 17.77. HRMS (ESI-TOF) Calcd for  $\text{C}_{20}\text{H}_{24}\text{NO}_4\text{S}_2^+$  ( $[\text{M}+\text{H}]^+$ ) 406.1141. Found 406.1142.

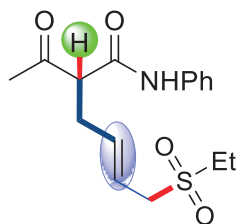

(*E*)-2-Acetyl-6-(ethylsulfonyl)-*N*-phenylhex-4-enamide (**4w1**). Isolated by flash column chromatography (petroleum ether/ethyl acetate = 2:1, v/v) in 66% yield (106.8 mg), *E/Z* > 20:1, which was detected by  $^1\text{H}$  NMR spectroscopy. Yellow oil.  $R_f$  (petroleum ether/ethyl acetate = 1:1.5, v/v) 0.33.  $^1\text{H}$  NMR (400 MHz,  $\text{CDCl}_3$ )  $\delta$  8.38 (s, 1H), 7.61 – 7.48 (m, 2H), 7.32 (t,  $J$  = 8.0 Hz, 2H), 7.13 (t,  $J$  = 7.4 Hz, 1H), 5.86 (dt,  $J$  = 14.3, 7.1 Hz, 1H), 5.74 – 5.53 (m, 1H), 3.63 (d,  $J$  = 7.3 Hz, 2H), 3.58 (t,  $J$  = 7.3 Hz, 1H), 2.89 (q,  $J$  = 7.5 Hz, 2H), 2.75 (t,  $J$  = 7.1 Hz, 2H), 2.31 (s, 3H), 1.28 (t,  $J$  = 7.5 Hz, 3H).  $^{13}\text{C}$  NMR (101 MHz,  $\text{CDCl}_3$ )  $\delta$  205.86, 166.00, 137.40, 136.36, 129.07, 124.84, 120.03, 119.72, 60.91, 55.62, 45.84, 32.84, 29.47, 6.32. HRMS (ESI-TOF) Calcd for  $\text{C}_{16}\text{H}_{22}\text{NO}_4\text{S}^+$  ( $[\text{M}+\text{H}]^+$ ) 324.1264. Found 324.1265.

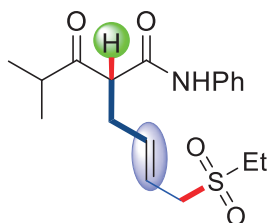

(*E*)-6-(Ethylsulfonyl)-2-isobutyryl-*N*-phenylhex-4-enamide (**4w2**). Isolated by flash column chromatography (petroleum ether/ethyl acetate = 3:1, v/v) in 73% yield (128.1 mg), *E/Z* > 20:1, which was detected by  $^1\text{H}$  NMR spectroscopy. Yellow oil.  $R_f$  (petroleum ether/ethyl acetate = 1.5:1, v/v) 0.33.  $^1\text{H}$  NMR (400 MHz,  $\text{CDCl}_3$ )  $\delta$  8.34 (s, 1H), 7.51 (d,  $J$  = 7.6 Hz, 2H), 7.33 (t,  $J$  = 7.9 Hz, 2H), 7.13 (t,  $J$  = 7.4 Hz, 1H), 5.84 (dt,  $J$  = 14.4, 7.1 Hz, 1H), 5.76 – 5.54 (m, 1H), 3.77 (dd,  $J$  = 7.9, 6.9 Hz, 1H), 3.62 (d,  $J$  = 7.3 Hz, 2H), 2.90 (q,  $J$  = 7.5 Hz, 2H), 2.82 (dt,  $J$  = 13.8, 6.9 Hz, 1H), 2.72 (dd,  $J$  = 11.6, 6.9 Hz, 2H), 1.30 (t,  $J$  = 7.5 Hz, 3H), 1.16 (d,  $J$  = 7.0 Hz, 3H), 1.14 (d,  $J$  = 6.9 Hz, 3H).  $^{13}\text{C}$  NMR (101 MHz,  $\text{CDCl}_3$ )  $\delta$  213.09, 165.77, 137.29, 135.83, 129.08, 124.79, 120.20, 119.96, 58.51, 55.62, 45.70, 41.71, 34.54, 17.98, 17.68, 6.34. HRMS (ESI-TOF) Calcd for  $\text{C}_{18}\text{H}_{26}\text{NO}_4\text{S}^+$  ( $[\text{M}+\text{H}]^+$ ) 352.1577. Found 352.1577.

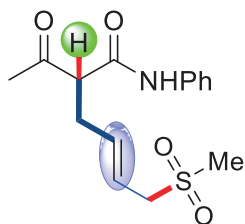

(*E*)-2-Acetyl-6-(methylsulfonyl)-*N*-phenylhex-4-enamide (**4x**). Isolated by flash column chromatography (petroleum ether/ethyl acetate = 1:1, v/v) in 83% yield (128.1

mg), *E/Z* > 20:1, which was detected by <sup>1</sup>H NMR spectroscopy. Yellow oil. *R<sub>f</sub>* (petroleum ether/ethyl acetate = 1:2, v/v) 0.33. <sup>1</sup>H NMR (400 MHz, CDCl<sub>3</sub>) δ 8.36 (s, 1H), 7.53 (d, *J* = 7.7 Hz, 2H), 7.32 (t, *J* = 7.9 Hz, 2H), 7.13 (t, *J* = 7.4 Hz, 1H), 5.88 (dt, *J* = 14.4, 7.1 Hz, 1H), 5.77 – 5.59 (m, 1H), 3.65 (d, *J* = 7.4 Hz, 2H), 3.58 (t, *J* = 7.3 Hz, 1H), 2.78 (s, 3H), 2.75 (d, *J* = 7.1 Hz, 2H), 2.31 (s, 3H). <sup>13</sup>C NMR (101 MHz, CDCl<sub>3</sub>) δ 205.91, 165.95, 137.35, 136.64, 129.08, 124.89, 120.08, 119.92, 60.87, 58.25, 39.27, 32.85, 29.46. HRMS (ESI-TOF) Calcd for C<sub>15</sub>H<sub>20</sub>NO<sub>4</sub>S<sup>+</sup> ([M+H]<sup>+</sup>) 310.1108. Found 310.1109.

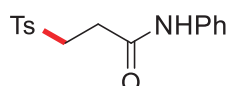

2-Methyl-*N*-phenyl-3-tosylpropanamide (**4y**). Isolated by flash column chromatography (petroleum ether/ethyl acetate = 24:1, v/v) in 75% yield (113.1 mg). White solid, m.p. = 15.4-154.1 °C. *R<sub>f</sub>*(petroleum ether/ethyl acetate = 8:1, v/v) 0.33. <sup>1</sup>H NMR (400 MHz, CDCl<sub>3</sub>) δ 8.16 (s, 1H), 7.81 (d, *J* = 8.2 Hz, 2H), 7.43 (d, *J* = 7.8 Hz, 2H), 7.33 (d, *J* = 8.0 Hz, 2H), 7.25 (dd, *J* = 9.9, 5.9 Hz, 2H), 7.07 (t, *J* = 7.4 Hz, 1H), 3.63 – 3.39 (m, 2H), 3.02 – 2.80 (m, 2H), 2.41 (s, 3H). <sup>13</sup>C NMR (101 MHz, CDCl<sub>3</sub>) δ 167.20, 145.34, 137.72, 135.55, 130.15, 128.94, 128.07, 124.43, 119.87, 52.04, 29.96, 21.67. HRMS (ESI-TOF) Calcd for C<sub>16</sub>H<sub>18</sub>NO<sub>3</sub>S<sup>+</sup> ([M+H]<sup>+</sup>) 304.1002. Found 304.1003. Spectra are consistent with literature report.<sup>1</sup>

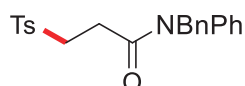

*N*-Benzyl-2-methyl-*N*-phenyl-3-tosylpropanamide (**4z**). Isolated by flash column chromatography (petroleum ether/ethyl acetate = 15:1, v/v) in 45% yield (91.0 mg). White solid, m.p. = 89.1-90.0 °C. *R<sub>f</sub>*(petroleum ether/ethyl acetate = 6:1, v/v) 0.33. <sup>1</sup>H NMR (400 MHz, CDCl<sub>3</sub>) δ 7.69 (d, *J* = 8.2 Hz, 2H), 7.43 – 7.29 (m, 5H), 7.25 (dd, *J* = 6.9, 3.5 Hz, 3H), 7.18 – 7.07 (m, 2H), 6.95 (dd, *J* = 6.3, 3.0 Hz, 2H), 4.82 (s, 2H), 3.60 – 3.31 (m, 2H), 2.66 – 2.50 (m, 2H), 2.44 (s, 3H). <sup>13</sup>C NMR (101 MHz, CDCl<sub>3</sub>) δ 168.87, 144.81, 141.24, 136.91, 136.07, 129.93, 129.89, 128.83, 128.56, 128.44, 128.30, 128.00, 127.56, 53.37, 52.21, 27.60, 21.70. HRMS (ESI-TOF) Calcd for C<sub>23</sub>H<sub>24</sub>NO<sub>3</sub>S<sup>+</sup> ([M+Na]<sup>+</sup>) 416.1291. Found 416.1296.

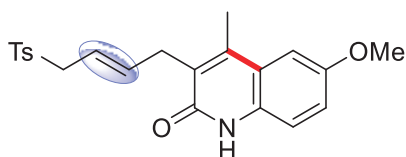

(*E*)-6-Methoxy-4-methyl-3-(4-tosylbut-2-en-1-yl)quinolin-2(1*H*)-one (**5a**). Isolated by flash column chromatography (petroleum ether/ethyl acetate/Et<sub>3</sub>N = 50:100:1, v/v) in 55% yield (43.8 mg), which was detected by <sup>1</sup>H NMR spectroscopy. Brown solid, m.p. = 210.0-210.4 °C. *R<sub>f</sub>*(petroleum ether/ethyl acetate = 1:3, v/v) 0.33. <sup>1</sup>H NMR (400 MHz, CDCl<sub>3</sub>) δ 11.55 (s, 1H), 7.62 (d, *J* = 8.2 Hz, 2H), 7.29 (s, 1H), 7.18 – 7.12 (m, 2H), 7.09 (d, *J* = 8.0 Hz, 2H), 5.73 – 5.59 (m, 1H), 5.49 (dd, *J* = 15.2, 7.6 Hz, 1H), 3.90 (s, 3H), 3.72 (d, *J* = 7.3 Hz, 2H), 3.52 (d, *J* = 6.1 Hz, 2H), 2.42 (s, 3H), 2.23 (s, 3H). <sup>13</sup>C NMR (101 MHz, CDCl<sub>3</sub>) δ 162.48, 155.17, 144.45, 144.00, 137.83, 135.13, 131.45, 129.44, 128.42, 128.10, 121.47, 118.56, 117.16, 117.09, 106.81, 60.00, 55.79, 30.00, 21.41, 15.35. HRMS (ESI-TOF) Calcd for C<sub>22</sub>H<sub>24</sub>NO<sub>4</sub>S<sup>+</sup> ([M+H]<sup>+</sup>) 398.1421. Found 398.1423.

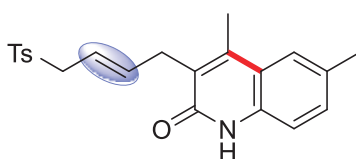

(*E*)-4,6-Dimethyl-3-(4-tosylbut-2-en-1-yl)quinolin-2(1*H*)-one (**5b**). Isolated by flash column chromatography (petroleum ether/ethyl acetate/Et<sub>3</sub>N = 50:50:1, v/v) in 61% yield (46.3 mg), which was detected by <sup>1</sup>H NMR spectroscopy. Brown solid, m.p. = 221.3-221.9 °C. *R<sub>f</sub>*(petroleum ether/ethyl acetate = 1:2, v/v) 0.33. <sup>1</sup>H NMR (400 MHz, CDCl<sub>3</sub>) δ 11.74 (s, 1H), 7.60 (d, *J* = 8.3 Hz, 2H), 7.50 (s, 1H), 7.32 (dd, *J* = 8.3, 1.4 Hz, 1H), 7.24 (d, *J* = 8.3 Hz, 1H), 7.06 (d, *J* = 8.0 Hz, 2H), 5.64 (dt, *J* = 15.4, 6.2 Hz, 1H), 5.54 – 5.41 (m, 1H), 3.72 (d, *J* = 7.3 Hz, 2H), 3.51 (d, *J* = 6.1 Hz, 2H), 2.46 (s, 3H), 2.43 (s, 3H), 2.19 (s, 3H). <sup>13</sup>C NMR (101 MHz, CDCl<sub>3</sub>) δ 162.94, 144.42, 144.38, 137.94, 135.01, 134.88, 131.98, 131.12, 129.42, 128.42, 127.52, 124.22, 120.72, 117.05, 115.93, 60.00, 29.91, 21.37, 21.35, 15.20. HRMS (ESI-TOF) Calcd for C<sub>22</sub>H<sub>24</sub>NO<sub>3</sub>S<sup>+</sup> ([M+H]<sup>+</sup>) 382.1471. Found 382.1474.

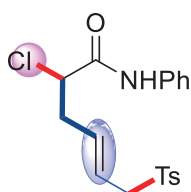

(*E*)-2-Chloro-*N*-phenyl-6-tosylhex-4-enamide (**6**). Isolated by flash column chromatography (petroleum ether/ethyl acetate = 4:1, v/v) in 57% yield (43.3 mg). White solid, m.p. = 118.4-119.2 °C. *R<sub>f</sub>*(petroleum ether/ethyl acetate = 1.5:1, v/v) 0.33. <sup>1</sup>H NMR (400 MHz, CDCl<sub>3</sub>) δ 8.25 (s, 1H), 7.73 (d, *J* = 8.2 Hz, 2H), 7.54 (d, *J* = 7.7 Hz, 2H), 7.41 – 7.28 (m, 4H), 7.17 (t, *J* = 7.4 Hz, 1H), 5.62 (td, *J* = 5.9, 3.5 Hz, 2H), 4.43 (dd, *J* = 7.4, 4.5 Hz, 1H), 3.83 – 3.73 (m, 2H), 2.96 – 2.72 (m, 2H), 2.42 (s, 3H). <sup>13</sup>C NMR (101 MHz, CDCl<sub>3</sub>) δ 165.82, 144.86, 136.76, 135.45, 134.43, 129.78, 129.13,

128.45, 125.25, 121.46, 120.17, 59.93, 59.73, 38.23, 21.65. HRMS (ESI-TOF) Calcd for  $C_{19}H_{21}ClNO_3S^+$  ( $[M+H]^+$ ) 378.0925. Found 378.0925.

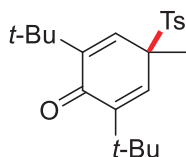

2,6-Di-*tert*-butyl-4-methyl-4-tosylcyclohexa-2,5-dien-1-one (**7**).  $^1H$  NMR (400 MHz,  $CDCl_3$ )  $\delta$  7.52 (d,  $J = 8.1$  Hz, 2H), 7.19 (d,  $J = 7.9$  Hz, 2H), 6.64 (s, 2H), 2.37 (s, 3H), 1.82 (s, 3H), 1.10 (s, 18H).  $^{13}C$  NMR (101 MHz,  $CDCl_3$ )  $\delta$  183.70, 151.22, 145.32, 135.71, 130.59, 130.26, 128.81, 65.82, 35.20, 28.98, 21.63, 18.53. HRMS (ESI-TOF) Calcd for  $C_{22}H_{30}O_3SNa^+$  ( $[M+Na]^+$ ) 397.1808. Found 397.1814. Spectra are consistent with literature report.<sup>2</sup>

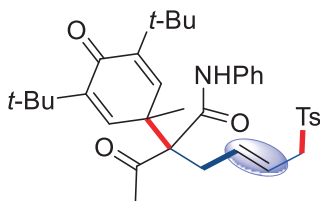

(*E*)-2-Acetyl-2-(3,5-di-*tert*-butyl-1-methyl-4-oxocyclohexa-2,5-dien-1-yl)-*N*-phenyl-6-tosylhex-4-enamide (**8**). Isolated by flash column chromatography (petroleum ether/ethyl acetate = 10:1, v/v) in 27% yield (81.2 mg).  $R_f$ (petroleum ether/ethyl acetate = 3:1, v/v) 0.33.  $^1H$  NMR (400 MHz,  $CDCl_3$ )  $\delta$  10.17 (s, 1H), 7.64 (d,  $J = 8.3$  Hz, 2H), 7.54 (d,  $J = 7.6$  Hz, 2H), 7.38 – 7.33 (m, 2H), 7.24 (d,  $J = 8.0$  Hz, 2H), 7.16 (t,  $J = 7.4$  Hz, 1H), 6.61 (d,  $J = 3.0$  Hz, 1H), 6.25 (d,  $J = 3.0$  Hz, 1H), 5.55 (dd,  $J = 15.0, 7.1$  Hz, 1H), 5.49 – 5.39 (m, 1H), 3.70 (td,  $J = 14.1, 6.3$  Hz, 2H), 3.20 (d,  $J = 13.7$  Hz, 1H), 2.42 (t,  $J = 5.3$  Hz, 1H), 2.34 (s, 3H), 2.28 (s, 3H), 1.31 (s, 3H), 1.24 (s, 9H), 1.23 (s, 9H).  $^{13}C$  NMR (101 MHz,  $CDCl_3$ )  $\delta$  212.30, 185.77, 165.44, 148.37, 148.19, 144.86, 141.56, 140.54, 137.25, 136.61, 135.62, 129.83, 129.11, 128.06, 124.83, 120.35, 120.16, 67.53, 59.89, 44.76, 35.20, 35.11, 34.33, 31.96, 29.34, 29.30, 22.09, 21.52. HRMS (ESI-TOF) Calcd for  $C_{36}H_{46}NO_5S^+$  ( $[M+H]^+$ ) 604.3091. Found 604.3091.

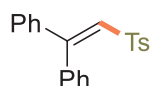

(2-Tosylethene-1,1-diyl)dibenzene (**9**).  $^1H$  NMR (400 MHz,  $CDCl_3$ )  $\delta$  7.47 (d,  $J = 8.3$  Hz, 2H), 7.39 – 7.33 (m, 2H), 7.33 – 7.26 (m, 4H), 7.23 – 7.17 (m, 2H), 7.14 (d,  $J = 8.1$  Hz, 2H), 7.09 (dd,  $J = 5.2, 3.3$  Hz, 2H), 6.99 (s, 1H), 2.37 (s, 3H).  $^{13}C$  NMR (101 MHz,  $CDCl_3$ )  $\delta$  154.74, 143.79, 139.24, 138.62, 135.60, 130.26, 129.79, 129.36, 128.97, 128.87, 128.60, 128.23, 127.83, 127.71, 21.59. HRMS (ESI-TOF) Calcd for

$C_{21}H_{18}NaO_2S^+$  ( $[M+Na]^+$ ) 357.0925. Found 357.0916. Spectra are consistent with literature report.<sup>3</sup>

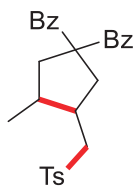

(3-Methyl-4-(tosylmethyl)cyclopentane-1,1-diyl)bis(phenylmethanone) (**10**). Isolated by flash column chromatography (petroleum ether/ethyl acetate = 15:1, v/v) in 72% yield (162.9 mg). Pale yellow solid, m.p. = 119-120 °C.  $R_f$  (petroleum ether/ethyl acetate = 5:1, v/v) 0.33.  $^1H$  NMR (400 MHz,  $CDCl_3$ )  $\delta$  7.80 (d,  $J$  = 8.2 Hz, 2H), 7.75 – 7.68 (m, 4H), 7.38 (t,  $J$  = 7.1 Hz, 2H), 7.33 – 7.23 (m, 6H), 3.21 – 3.08 (m, 2H), 2.73 (ddd,  $J$  = 13.1, 9.3, 6.8 Hz, 2H), 2.62 – 2.45 (m, 2H), 2.41 (d,  $J$  = 2.8 Hz, 3H), 2.33 (ddd,  $J$  = 13.4, 10.1, 5.7 Hz, 2H), 0.90 (d,  $J$  = 7.0 Hz, 3H).  $^{13}C$  NMR (101 MHz,  $CDCl_3$ )  $\delta$  198.36, 197.54, 144.64, 136.69, 135.63, 135.30, 133.13, 133.07, 129.92, 129.30, 129.26, 129.21, 128.54, 128.53, 128.10, 68.56, 56.72, 41.26, 38.13, 37.70, 37.11, 21.64, 15.01. HRMS (ESI-TOF) Calcd for  $C_{28}H_{29}O_4S^+$  ( $[M+H]^+$ ) 461.1781. Found 461.1781.

## VII. General procedure for the synthesis of vinylcyclopropane substrates **1**

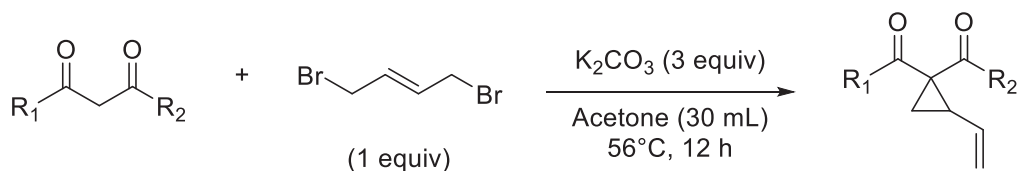

The substrate vinylcyclopropane **1** or **1'** was synthesized according to the literature procedure,<sup>4</sup> but some adjustments were made.

A mixture of dicarbonyl compound (10.0 mmol), 1,4-dibromo-2-butene (10.0 mmol, 1 equiv) and  $K_2CO_3$  (30 mmol, 3 equiv) in acetone (30 mL) was stirred at 56 °C for 12 h. Then, it was quenched with water (50.0 mL) and extracted with  $CH_2Cl_2$  (25.0 mL  $\times$  4). The residue obtained after evaporation of the solvent was purified on silica gel (petroleum ether–ethyl acetate) to afford the vinylcyclopropane **1** or **1'**.

Some of the vinylcyclopropane **1** or **1'** are known, and their NMR spectra data match those previously reported in the literature.<sup>3</sup> The other vinylcyclopropanes listed below are all new compounds.

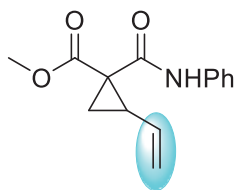

Methyl 1-(phenylcarbamoyl)-2-vinylcyclopropane-1-carboxylate (**1a1**), isolated by flash column chromatography (petroleum ether/ethyl acetate = 30:1). Major diastereoisomer: colourless oil,  $^1\text{H}$  NMR (400 MHz,  $\text{CDCl}_3$ )  $\delta$  10.56 (s, 1H), 7.64 – 7.49 (m, 2H), 7.37 – 7.27 (m, 2H), 7.15 – 7.02 (m, 1H), 5.66 (ddd,  $J = 17.1, 10.2, 8.8$  Hz, 1H), 5.37 (ddd,  $J = 17.1, 1.4, 0.6$  Hz, 1H), 5.26 – 5.13 (m, 1H), 3.76 (s, 3H), 2.64 (dd,  $J = 17.3, 8.8$  Hz, 1H), 2.20 (dd,  $J = 9.2, 4.4$  Hz, 1H), 1.97 (dd,  $J = 8.1, 4.4$  Hz, 1H).  $^{13}\text{C}$  NMR (101 MHz,  $\text{CDCl}_3$ )  $\delta$  172.25, 165.91, 138.06, 133.04, 128.96, 124.20, 120.21, 120.08, 52.36, 38.26, 34.90, 21.74. HRMS (ESI-TOF) Calcd for  $\text{C}_{14}\text{H}_{16}\text{NO}_3^+$  ( $[\text{M}+\text{H}]^+$ ) 246.1125. Found 246.1125.

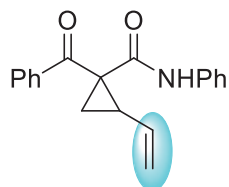

1-Benzoyl-*N*-phenyl-2-vinylcyclopropane-1-carboxamide (**1a3**), isolated by flash column chromatography (petroleum ether/ethyl acetate = 24:1). Major diastereoisomer : minor diastereoisomer = 3:1. Major diastereoisomer: white solid, m. p. = 107-108 °C,  $^1\text{H}$  NMR (400 MHz,  $\text{CDCl}_3$ )  $\delta$  7.98 (d,  $J = 7.3$  Hz, 2H), 7.63 (s, 1H), 7.58 (d,  $J = 7.4$  Hz, 1H), 7.47 (dd,  $J = 10.6, 4.6$  Hz, 2H), 7.32 (d,  $J = 7.8$  Hz, 2H), 7.29 – 7.21 (m, 2H), 7.07 (t,  $J = 7.3$  Hz, 1H), 5.33 (dd,  $J = 16.9, 1.6$  Hz, 1H), 5.27 – 5.15 (m, 1H), 5.03 (dd,  $J = 10.0, 1.5$  Hz, 1H), 2.97 (dd,  $J = 16.0, 8.5$  Hz, 1H), 1.89 (dd,  $J = 7.1, 4.9$  Hz, 1H), 1.84 (dd,  $J = 8.8, 4.8$  Hz, 1H).  $^{13}\text{C}$  NMR (101 MHz,  $\text{CDCl}_3$ )  $\delta$  196.93, 196.43, 166.63, 165.05, 137.60, 137.45, 136.53, 135.91, 134.00, 133.73, 133.52, 133.41, 129.27, 128.92, 128.90, 128.81, 124.60, 119.99, 118.67, 118.61, 43.78, 42.85, 32.08, 29.84, 20.38, 19.26. HRMS (ESI-TOF) Calcd for  $\text{C}_{19}\text{H}_{18}\text{NO}_2^+$  ( $[\text{M}+\text{H}]^+$ ) 292.1332. Found 292.1330.

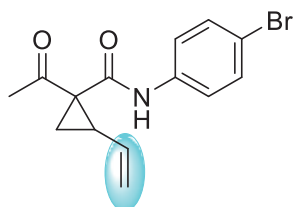

1-Acetyl-*N*-(4-bromophenyl)-2-vinylcyclopropane-1-carboxamide (**1b5**), isolated by flash column chromatography (petroleum ether/ethyl acetate = 20:1). Major diastereoisomer : minor diastereoisomer = 3:2. Major diastereoisomer: pale yellow solid.



m. p.= 142-143 °C,  $^1\text{H}$  NMR (400 MHz,  $\text{CDCl}_3$ )  $\delta$  10.32 (s, 1H), 7.48 (d,  $J$  = 8.9 Hz, 2H), 7.42 (d,  $J$  = 8.9 Hz, 2H), 5.74 (ddd,  $J$  = 17.1, 10.2, 7.0 Hz, 1H), 5.41 (d,  $J$  = 17.0 Hz, 1H), 5.32 (d,  $J$  = 10.2 Hz, 1H), 2.63 (d,  $J$  = 8.0 Hz, 1H), 2.31 (dd,  $J$  = 9.1, 5.3 Hz, 1H), 2.21 (s, 3H), 1.90 (dd,  $J$  = 7.9, 5.3 Hz, 1H).  $^{13}\text{C}$  NMR (101 MHz,  $\text{CDCl}_3$ )  $\delta$  207.59, 166.32, 137.07, 132.10, 131.92, 121.65, 121.15, 116.75, 42.37, 37.04, 30.99, 21.21. HRMS (ESI-TOF) Calcd for  $\text{C}_{14}\text{H}_{15}\text{BrNO}_2^+$  ( $[\text{M}+\text{H}]^+$ ) 308.0281. Found 308.0278.

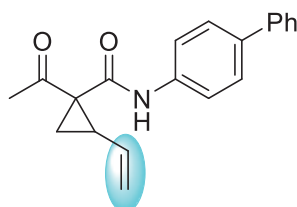

*N*-([1,1'-Biphenyl]-4-yl)-1-acetyl-2-vinylcyclopropane-1-carboxamide (**1b6**), isolated by flash column chromatography (petroleum ether/ethyl acetate = 24:1). Major diastereoisomer: colourless oil,  $^1\text{H}$  NMR (400 MHz,  $\text{CDCl}_3$ )  $\delta$  10.19 (s, 1H), 7.65 (d,  $J$  = 8.5 Hz, 2H), 7.57 (t,  $J$  = 7.0 Hz, 4H), 7.43 (t,  $J$  = 7.6 Hz, 2H), 7.33 (t,  $J$  = 7.3 Hz, 1H), 5.73 (ddd,  $J$  = 17.1, 10.1, 7.2 Hz, 1H), 5.41 (d,  $J$  = 17.0 Hz, 1H), 5.31 (d,  $J$  = 10.2 Hz, 1H), 2.65 (dd,  $J$  = 16.0, 8.0 Hz, 1H), 2.30 (dd,  $J$  = 9.0, 5.3 Hz, 1H), 2.23 (s, 3H), 1.90 (dd,  $J$  = 7.8, 5.3 Hz, 1H).  $^{13}\text{C}$  NMR (101 MHz,  $\text{CDCl}_3$ )  $\delta$  207.35, 166.28, 140.52, 137.28, 137.07, 132.29, 128.82, 127.61, 127.13, 126.87, 120.90, 120.41, 42.67, 36.63, 30.99, 21.05. HRMS (ESI-TOF) Calcd for  $\text{C}_{20}\text{H}_{20}\text{NO}_2^+$  ( $[\text{M}+\text{H}]^+$ ) 306.1489. Found 306.1488.

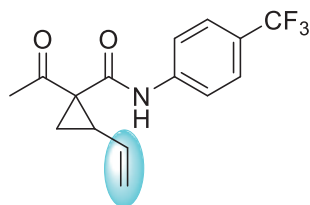

1-Acetyl-*N*-(4-(trifluoromethyl)phenyl)-2-vinylcyclopropane-1-carboxamide (**1b7**), isolated by flash column chromatography (petroleum ether/ethyl acetate = 20:1), Major diastereoisomer: pale yellow solid, m. p.= 101-102 °C,  $^1\text{H}$  NMR (400 MHz,  $\text{CDCl}_3$ )  $\delta$  10.53 (s, 1H), 7.69 (d,  $J$  = 8.5 Hz, 2H), 7.57 (d,  $J$  = 8.6 Hz, 2H), 5.76 (ddd,  $J$  = 17.0, 10.2, 6.9 Hz, 1H), 5.42 (dt,  $J$  = 17.0, 1.2 Hz, 1H), 5.33 (dt,  $J$  = 10.2, 1.1 Hz, 1H), 2.72 – 2.59 (m, 1H), 2.35 (dd,  $J$  = 9.1, 5.3 Hz, 1H), 2.21 (s, 3H), 1.92 (dd,  $J$  = 8.0, 5.3 Hz, 1H).  $^{13}\text{C}$  NMR (101 MHz,  $\text{CDCl}_3$ )  $\delta$  207.58, 166.62, 141.02, 132.00, 126.22 (q,  $J$  = 3.1 Hz), 125.93 (q,  $J$  = 32.3 Hz), 124.12 (q,  $J$  = 272.7 Hz), 121.26, 119.73, 42.34, 37.32, 30.88, 21.35. HRMS (ESI-TOF) Calcd for  $\text{C}_{15}\text{H}_{15}\text{F}_3\text{NO}_2^+$  ( $[\text{M}+\text{H}]^+$ ) 298.1049. Found 298.1051.

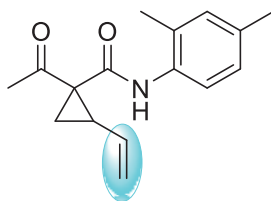

1-Acetyl-*N*-(2,4-dimethylphenyl)-2-vinylcyclopropane-1-carboxamide (**1e**), isolated by flash column chromatography (petroleum ether/ethyl acetate = 20:1), Major diastereoisomer: pale yellow solid, m. p.= 226-227 °C,  $^1\text{H}$  NMR (400 MHz,  $\text{CDCl}_3$ )  $\delta$  9.86 (s, 1H), 7.74 (d,  $J$  = 8.0 Hz, 1H), 6.96 (d,  $J$  = 7.7 Hz, 2H), 5.70 (ddd,  $J$  = 17.2, 10.2, 7.2 Hz, 1H), 5.45 – 5.32 (m, 1H), 5.26 (d,  $J$  = 10.2 Hz, 1H), 2.61 (dd,  $J$  = 16.1, 7.9 Hz, 1H), 2.27 (s, 3H), 2.27 (s, 3H), 2.23 – 2.15 (m, 4H), 1.84 (dd,  $J$  = 7.9, 5.2 Hz, 1H).  $^{13}\text{C}$  NMR (101 MHz,  $\text{CDCl}_3$ )  $\delta$  207.13, 166.26, 134.27, 133.65, 132.53, 131.09, 128.74, 127.09, 122.31, 120.49, 42.74, 36.14, 30.74, 20.98, 20.87, 17.94. HRMS (ESI-TOF) Calcd for  $\text{C}_{16}\text{H}_{20}\text{NO}_2^+$  ( $[\text{M}+\text{H}]^+$ ) 258.1489. Found 258.1492.

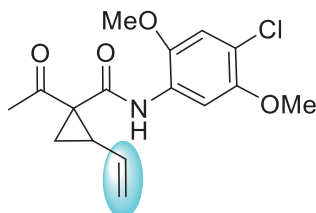

1-Acetyl-*N*-(4-(iodo- $\lambda^2$ -methyl)-2,5-dimethoxyphenyl)-2-vinylcyclopropane-1-carboxamide (**1g**), isolated by flash column chromatography (petroleum ether/ethyl acetate = 20:1), Major diastereoisomer : minor diastereoisomer = 3:2. Major diastereoisomer: white solid, m. p.= 116-117 °C,  $^1\text{H}$  NMR (400 MHz,  $\text{CDCl}_3$ )  $\delta$  10.36 (s, 1H), 8.21 (s, 1H), 6.89 (s, 1H), 5.70 (ddd,  $J$  = 17.2, 10.2, 7.3 Hz, 1H), 5.40 (dt,  $J$  = 17.0, 1.1 Hz, 1H), 5.29 (d,  $J$  = 10.2 Hz, 1H), 3.89 (s, 3H), 3.87 (s, 3H), 2.62 (dd,  $J$  = 16.2, 7.9 Hz, 1H), 2.24 (s, 3H), 2.22 – 2.17 (m, 1H), 1.90 (dd,  $J$  = 7.9, 5.3 Hz, 1H).  $^{13}\text{C}$  NMR (101 MHz,  $\text{CDCl}_3$ )  $\delta$  206.25, 166.23, 148.78, 142.38, 132.25, 127.10, 120.67, 115.51, 112.20, 104.87, 56.52, 43.03, 36.19, 30.77, 20.82. HRMS (ESI-TOF) Calcd for  $\text{C}_{16}\text{H}_{19}\text{ClNO}_4^+$  ( $[\text{M}+\text{H}]^+$ ) 324.0997. Found 324.0999.

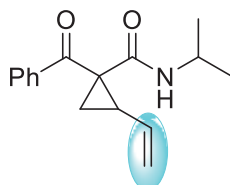

1-Benzoyl-*N*-isopropyl-2-vinylcyclopropane-1-carboxamide (**1h**), isolated by flash column chromatography (petroleum ether/ethyl acetate = 10:1), pale yellow oil. Major diastereoisomer: white solid, m. p.= 220-221 °C,  $^1\text{H}$  NMR (400 MHz,  $\text{CDCl}_3$ )  $\delta$  8.01 – 7.88 (m, 2H), 7.57 (t,  $J$  = 7.4 Hz, 1H), 7.45 (t,  $J$  = 7.7 Hz, 2H), 5.60 – 5.47 (m, 1H),

5.39 (s, 1H), 5.36 – 5.31 (m, 1H), 5.14 (dd,  $J = 10.2, 1.5$  Hz, 1H), 4.08 – 3.85 (m, 1H), 2.67 (dd,  $J = 16.2, 8.9$  Hz, 1H), 2.05 (dd,  $J = 7.1, 4.7$  Hz, 1H), 1.45 (dd,  $J = 8.9, 4.7$  Hz, 1H), 1.00 (d,  $J = 6.6$  Hz, 3H), 0.78 (d,  $J = 6.6$  Hz, 3H).  $^{13}\text{C}$  NMR (101 MHz,  $\text{CDCl}_3$ )  $\delta$  197.09, 165.98, 136.35, 134.08, 133.38, 128.78, 128.62, 117.84, 43.10, 42.02, 29.01, 22.70, 21.97, 20.65. HRMS (ESI-TOF) Calcd for  $\text{C}_{16}\text{H}_{20}\text{NO}_2^+$  ( $[\text{M}+\text{H}]^+$ ) 258.1489. Found 258.1489.

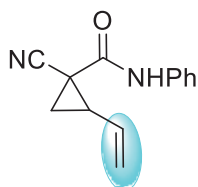

1-Cyano-*N*-phenyl-2-vinylcyclopropane-1-carboxamide (**1'a5**), isolated by flash column chromatography (petroleum ether/ethyl acetate = 30:1), Major diastereoisomer: yellow oil,  $^1\text{H}$  NMR (400 MHz,  $\text{CDCl}_3$ )  $\delta$  8.06 (s, 1H), 7.55 – 7.45 (m, 2H), 7.39 – 7.31 (m, 2H), 7.21 – 7.11 (m, 1H), 5.68 (ddd,  $J = 17.0, 10.2, 8.3$  Hz, 1H), 5.50 – 5.45 (m, 1H), 5.45 – 5.37 (m, 1H), 2.67 (dd,  $J = 16.7, 8.2$  Hz, 1H), 2.10 (dd,  $J = 8.9, 4.9$  Hz, 1H), 1.72 – 1.59 (m, 1H). Diastereoisomer *Mixture* spectrum:  $^{13}\text{C}$  NMR (101 MHz,  $\text{CDCl}_3$ )  $\delta$  162.73, 160.81, 136.91, 136.80, 132.37, 130.78, 129.14, 129.11, 125.35, 125.30, 121.12, 120.78, 120.44, 119.86, 118.25, 35.77, 33.30, 23.19, 22.35, 21.32, 21.25. HRMS (ESI-TOF) Calcd for  $\text{C}_{13}\text{H}_{13}\text{N}_2\text{O}^+$  ( $[\text{M}+\text{H}]^+$ ) 213.1022. Found 213.1020.

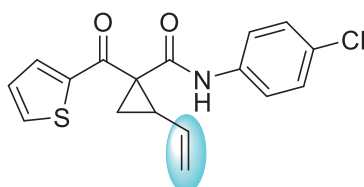

*N*-(4-chlorophenyl)-1-(thiophene-2-carbonyl)-2-vinylcyclopropane-1-carboxamide (**1'b**), isolated by flash column chromatography (petroleum ether/ethyl acetate = 21:1), Major diastereoisomer : minor diastereoisomer = 3:2. Major diastereoisomer: yellow solid, m. p.= 132.0-133.0 °C,  $^1\text{H}$  NMR (400 MHz,  $\text{CDCl}_3$ )  $\delta$  8.13 (s, 1H), 7.97 (dd,  $J = 3.9, 0.9$  Hz, 1H), 7.67 (dd,  $J = 4.9, 0.9$  Hz, 1H), 7.42 (d,  $J = 8.8$  Hz, 2H), 7.26 – 7.20 (m, 2H), 7.12 (dd,  $J = 4.8, 3.9$  Hz, 1H), 5.58 (ddd,  $J = 17.0, 10.1, 8.9$  Hz, 1H), 5.38 (dd,  $J = 17.0, 1.0$  Hz, 1H), 5.18 (dd,  $J = 10.2, 1.2$  Hz, 1H), 2.09 (dd,  $J = 7.2, 5.1$  Hz, 1H), 1.89 – 1.81 (m, 1H), 1.62 (dd,  $J = 8.9, 5.0$  Hz, 1H). Diastereoisomer *Mixture* spectrum  $^{13}\text{C}$  NMR (101 MHz,  $\text{CDCl}_3$ )  $\delta$  188.49, 188.21, 166.37, 164.93, 143.28, 142.33, 136.42, 136.29, 135.62, 135.33, 135.05, 134.45, 133.53, 133.38, 129.61, 128.97, 128.76, 128.72, 121.26, 121.19, 118.72, 118.47, 44.12, 43.20, 31.26, 29.63, 20.26, 19.09. HRMS (ESI-TOF) Calcd for  $\text{C}_{17}\text{H}_{15}\text{ClNO}_2\text{S}^+$  ( $[\text{M}+\text{H}]^+$ ) 332.0507. Found 332.0511.

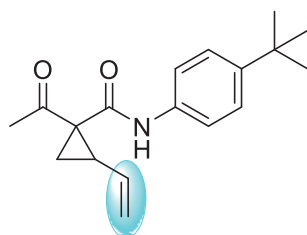

1-Acetyl-*N*-(4-(tert-butyl)phenyl)-2-vinylcyclopropane-1-carboxamide (**1'e4**), isolated by flash column chromatography (petroleum ether/ethyl acetate = 20:1), Major diastereoisomer : minor diastereoisomer = 4:1. Major diastereoisomer: pale yellow oil,  $^1\text{H}$  NMR (400 MHz,  $\text{CDCl}_3$ )  $\delta$  9.77 (s, 1H), 7.47 (d,  $J = 8.7$  Hz, 2H), 7.33 (d,  $J = 8.7$  Hz, 2H), 5.73 – 5.62 (m, 1H), 5.37 (dt,  $J = 17.0, 1.2$  Hz, 1H), 5.28 – 5.23 (m, 1H), 2.62 (dd,  $J = 16.3, 7.8$  Hz, 1H), 2.22 (s, 3H), 2.18 – 2.13 (m, 1H), 1.84 (dd,  $J = 7.8, 5.2$  Hz, 1H), 1.30 (s, 10H).  $^{13}\text{C}$  NMR (101 MHz,  $\text{CDCl}_3$ )  $\delta$  206.64, 166.18, 147.31, 135.34, 132.46, 125.78, 120.40, 119.93, 43.11, 35.69, 34.39, 31.38, 30.74, 20.69. HRMS (ESI-TOF) Calcd for  $\text{C}_{18}\text{H}_{24}\text{NO}_2^+$  ( $[\text{M}+\text{H}]^+$ ) 286.1802. Found 286.1806.

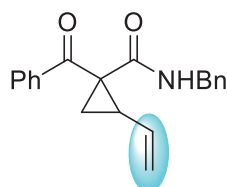

1-Benzoyl-*N*-benzyl-2-vinylcyclopropane-1-carboxamide (**1'f**), isolated by flash column chromatography (petroleum ether/ethyl acetate = 10:1), Major diastereoisomer: white solid, m. p.= 132.0-133.0  $^\circ\text{C}$ ,  $^1\text{H}$  NMR (400 MHz,  $\text{CDCl}_3$ )  $\delta$  8.01 – 7.91 (m, 2H), 7.63 – 7.56 (m, 1H), 7.46 (dd,  $J = 10.6, 4.8$  Hz, 2H), 7.21 – 7.11 (m, 3H), 6.92 – 6.82 (m, 2H), 5.89 (s, 1H), 5.65 – 5.50 (m, 1H), 5.36 (dd,  $J = 17.1, 1.4$  Hz, 1H), 5.16 (dd,  $J = 10.2, 1.5$  Hz, 1H), 4.33 (qd,  $J = 15.0, 5.7$  Hz, 2H), 2.71 (dd,  $J = 16.3, 9.0$  Hz, 1H), 2.12 (dd,  $J = 7.2, 4.8$  Hz, 1H), 1.50 (dd,  $J = 8.9, 4.7$  Hz, 1H).  $^{13}\text{C}$  NMR (101 MHz,  $\text{CDCl}_3$ )  $\delta$  196.70, 166.95, 137.52, 136.26, 134.07, 133.51, 128.88, 128.81, 128.53, 127.41, 127.38, 118.18, 44.08, 43.05, 29.14, 20.68. HRMS (ESI-TOF) Calcd for  $\text{C}_{20}\text{H}_{20}\text{NO}_2^+$  ( $[\text{M}+\text{H}]^+$ ) 306.1489. Found 306.1490.

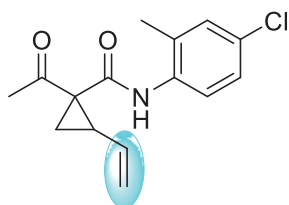

1-Acetyl-*N*-(4-chloro-2-methylphenyl)-2-vinylcyclopropane-1-carboxamide (**1'g2**), isolated by flash column chromatography (petroleum ether/ethyl acetate = 30:1), Major diastereoisomer: white solid, m. p.= 96-97  $^\circ\text{C}$ ,  $^1\text{H}$  NMR (400 MHz,  $\text{CDCl}_3$ )  $\delta$  10.29 (s,

1H), 7.95 (d,  $J = 8.3$  Hz, 1H), 7.16 – 7.08 (m, 2H), 5.75 (ddd,  $J = 17.0, 10.2, 6.9$  Hz, 1H), 5.40 (dt,  $J = 17.0, 1.3$  Hz, 1H), 5.31 (dt,  $J = 10.2, 1.2$  Hz, 1H), 2.71 – 2.54 (m, 1H), 2.31 (s, 4H), 2.19 (s, 3H), 1.89 (dd,  $J = 8.0, 5.2$  Hz, 1H).  $^{13}\text{C}$  NMR (101 MHz,  $\text{CDCl}_3$ )  $\delta$  207.72, 166.31, 135.04, 132.21, 130.07, 130.03, 129.14, 126.46, 122.87, 121.03, 42.31, 37.07, 30.79, 21.38, 17.90. HRMS (ESI-TOF) Calcd for  $\text{C}_{15}\text{H}_{17}\text{ClNO}_2^+$  ( $[\text{M}+\text{H}]^+$ ) 278.0942. Found 278.0942.

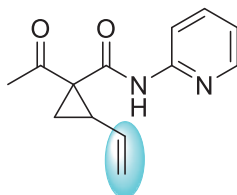

1-Acetyl-*N*-(pyridin-2-yl)-2-vinylcyclopropane-1-carboxamide (**1'i**), isolated by flash column chromatography (petroleum ether/ethyl acetate = 30:1). Major diastereoisomer: colourless oil, m. p. = 101-102 °C,  $^1\text{H}$  NMR (400 MHz,  $\text{CDCl}_3$ )  $\delta$  9.83 (s, 1H), 8.31 (dd,  $J = 4.9, 1.0$  Hz, 1H), 8.18 (d,  $J = 8.4$  Hz, 1H), 7.80 – 7.63 (m, 1H), 7.05 (ddd,  $J = 7.3, 4.9, 1.0$  Hz, 1H), 5.62 (ddd,  $J = 17.1, 10.1, 8.9$  Hz, 1H), 5.35 (d,  $J = 16.5$  Hz, 1H), 5.19 (d,  $J = 10.2$  Hz, 1H), 2.53 (dd,  $J = 16.7, 8.8$  Hz, 1H), 2.22 (s, 3H), 2.12 (dd,  $J = 7.6, 5.3$  Hz, 1H), 1.84 (dd,  $J = 9.1, 5.3$  Hz, 1H).  $^{13}\text{C}$  NMR (101 MHz,  $\text{CDCl}_3$ )  $\delta$  203.86, 165.22, 151.26, 148.10, 138.27, 133.04, 119.99, 119.58, 114.28, 44.39, 34.97, 26.77, 21.33. HRMS (ESI-TOF) Calcd for  $\text{C}_{13}\text{H}_{15}\text{N}_2\text{O}_2^+$  ( $[\text{M}+\text{H}]^+$ ) 231.1128. Found 231.1127.

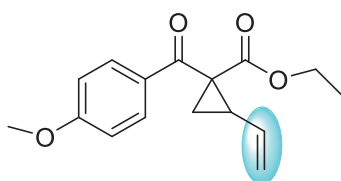

Ethyl 1-(4-methoxybenzoyl)-2-vinylcyclopropane-1-carboxylate (**1'j2**), isolated by flash column chromatography (petroleum ether/ethyl acetate = 24:1), Major diastereoisomer : minor diastereoisomer = 4:1. Major diastereoisomer: colourless oil,  $^1\text{H}$  NMR (400 MHz,  $\text{CDCl}_3$ )  $\delta$  7.87 (d,  $J = 8.9$  Hz, 2H), 6.92 (d,  $J = 8.9$  Hz, 2H), 5.78 (ddd,  $J = 17.1, 10.2, 8.9$  Hz, 1H), 5.38 (dd,  $J = 17.1, 1.1$  Hz, 1H), 5.20 (dd,  $J = 10.3, 1.4$  Hz, 1H), 4.04 (q,  $J = 7.1$  Hz, 2H), 3.87 (s, 3H), 2.68 (d,  $J = 7.7$  Hz, 1H), 1.89 (dt,  $J = 7.0, 3.5$  Hz, 1H), 1.63 – 1.54 (m, 5H), 0.98 (t,  $J = 7.1$  Hz, 3H).  $^{13}\text{C}$  NMR (101 MHz,  $\text{CDCl}_3$ )  $\delta$  192.63, 169.61, 163.39, 133.35, 130.73, 129.82, 118.55, 113.71, 61.36, 55.48, 40.34, 30.14, 21.15, 13.92. HRMS (ESI-TOF) Calcd for  $\text{C}_{16}\text{H}_{19}\text{O}_4^+$  ( $[\text{M}+\text{H}]^+$ ) 275.1278. Found 275.1279.

## VI. Copies of $^1\text{H}$ , $^{19}\text{F}$ , $^{13}\text{C}$ and DEPT NMR spectra

### 3a, $^1\text{H}$ NMR

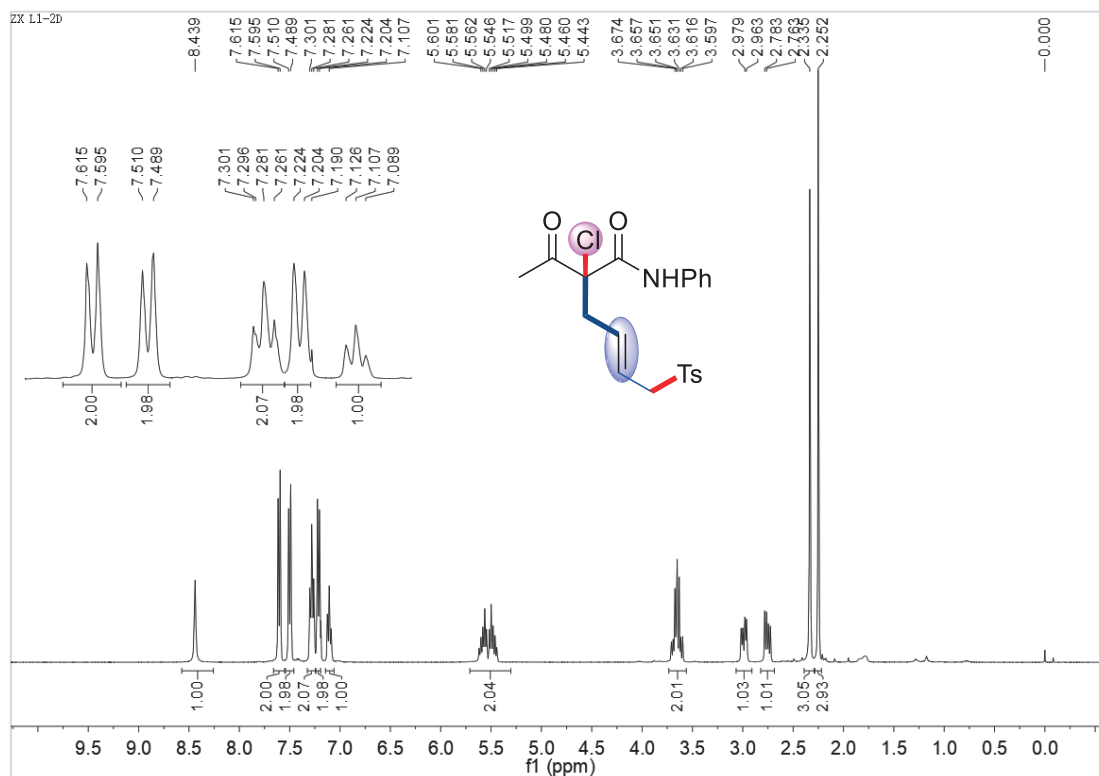

### 3a, $^{13}\text{C}$ NMR

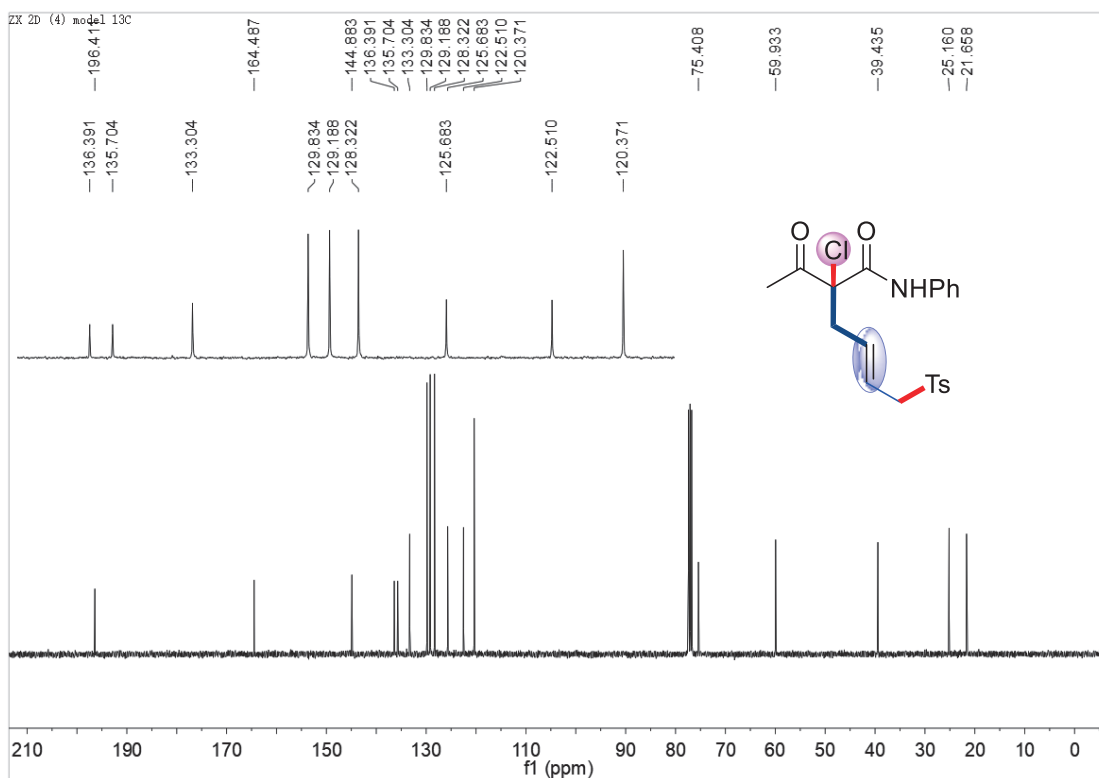

### 3a, DEPT 90 and DEPT 135

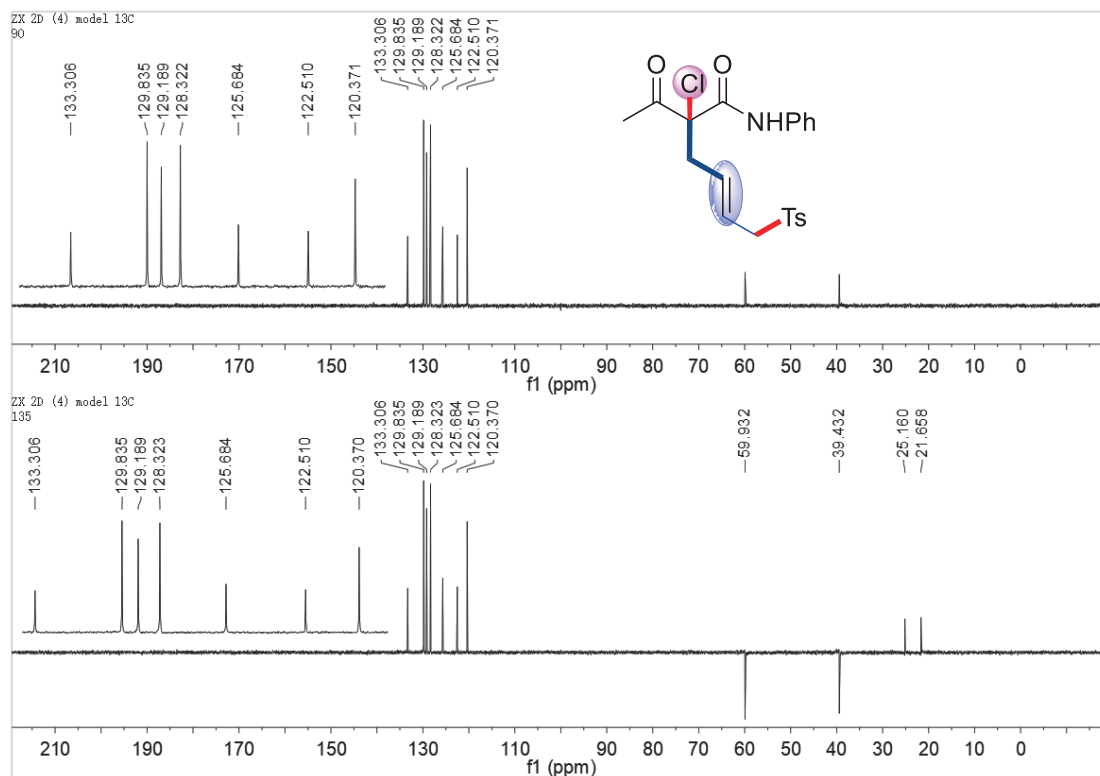

### 3a1, <sup>1</sup>H NMR

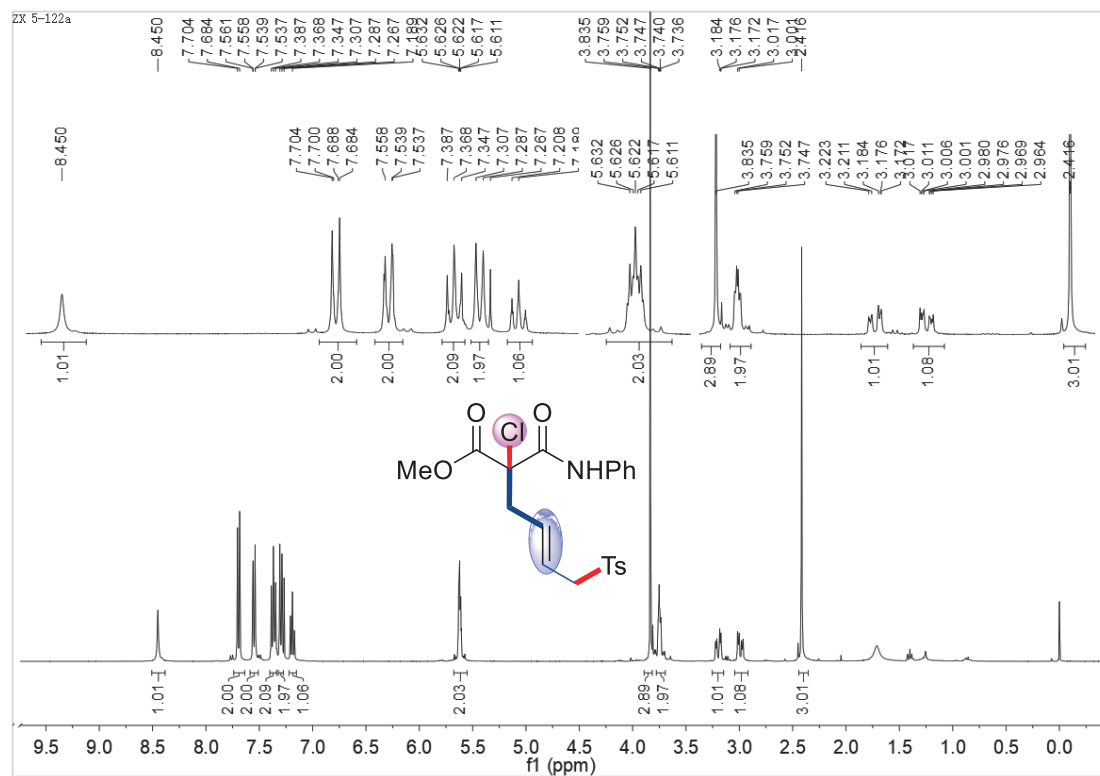

### 3a1, <sup>13</sup>C NMR

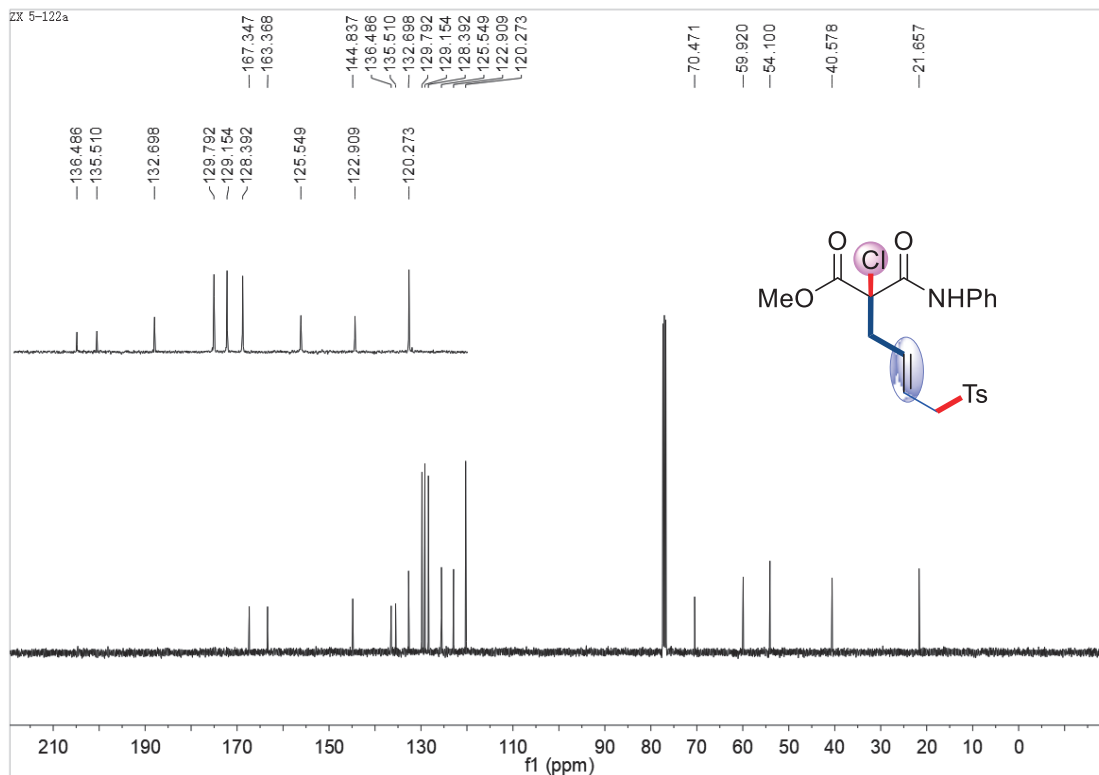

### 3a1, DEPT 90 and DEPT 135

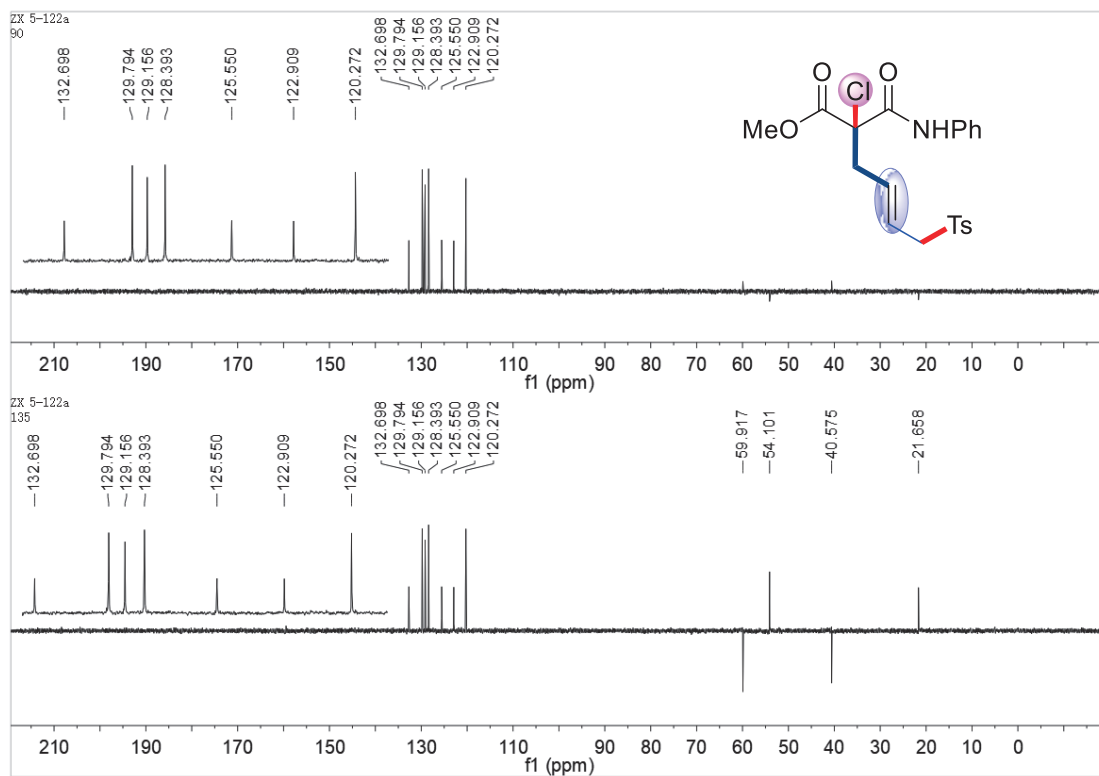



### 3a2, <sup>1</sup>H NMR

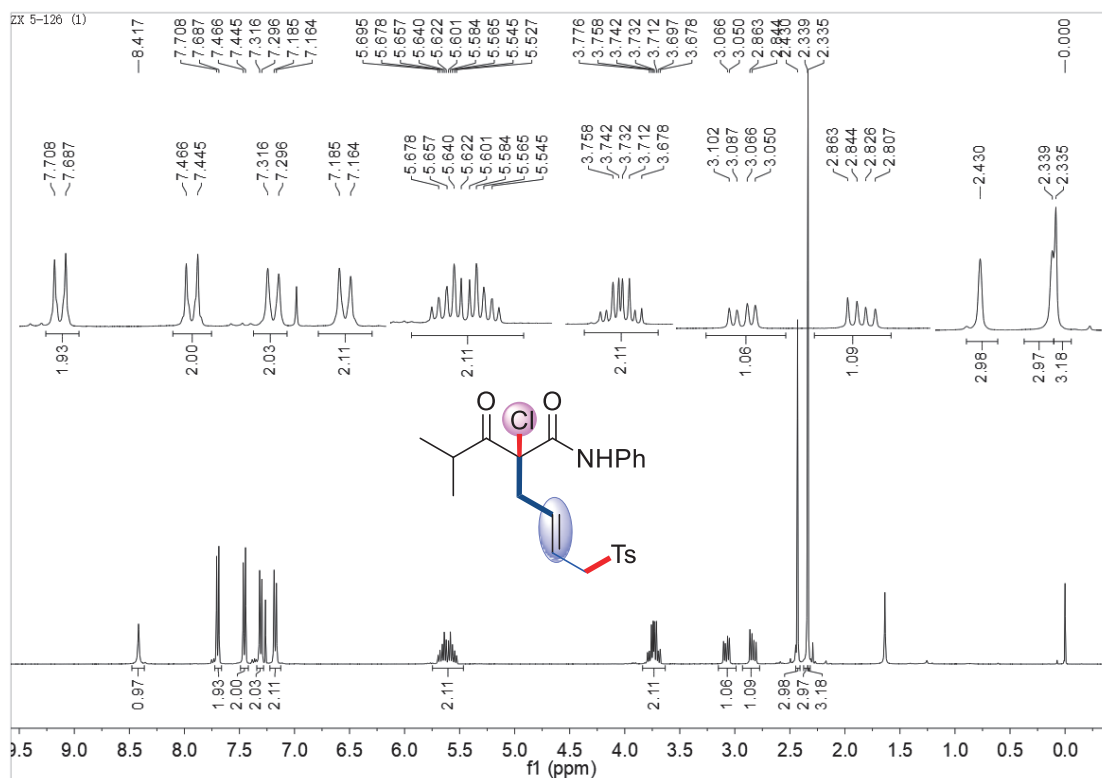

### 3a2, <sup>13</sup>C NMR

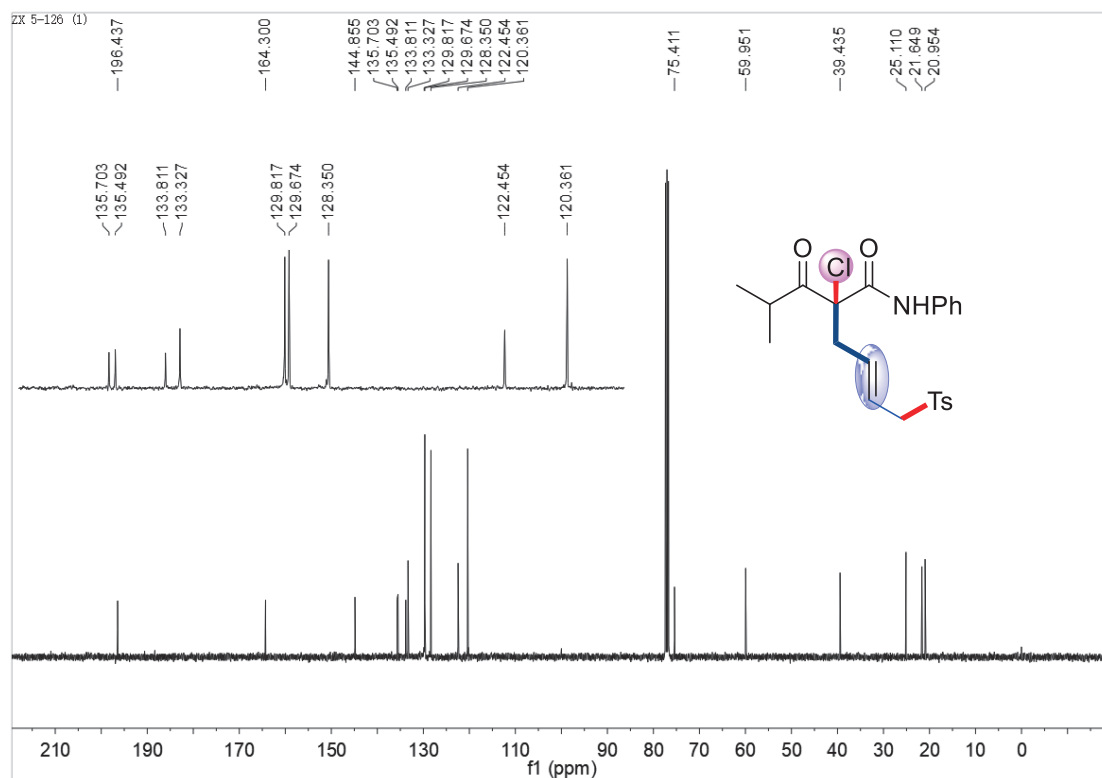

### 3a2 DEPT 90 and DEPT 135

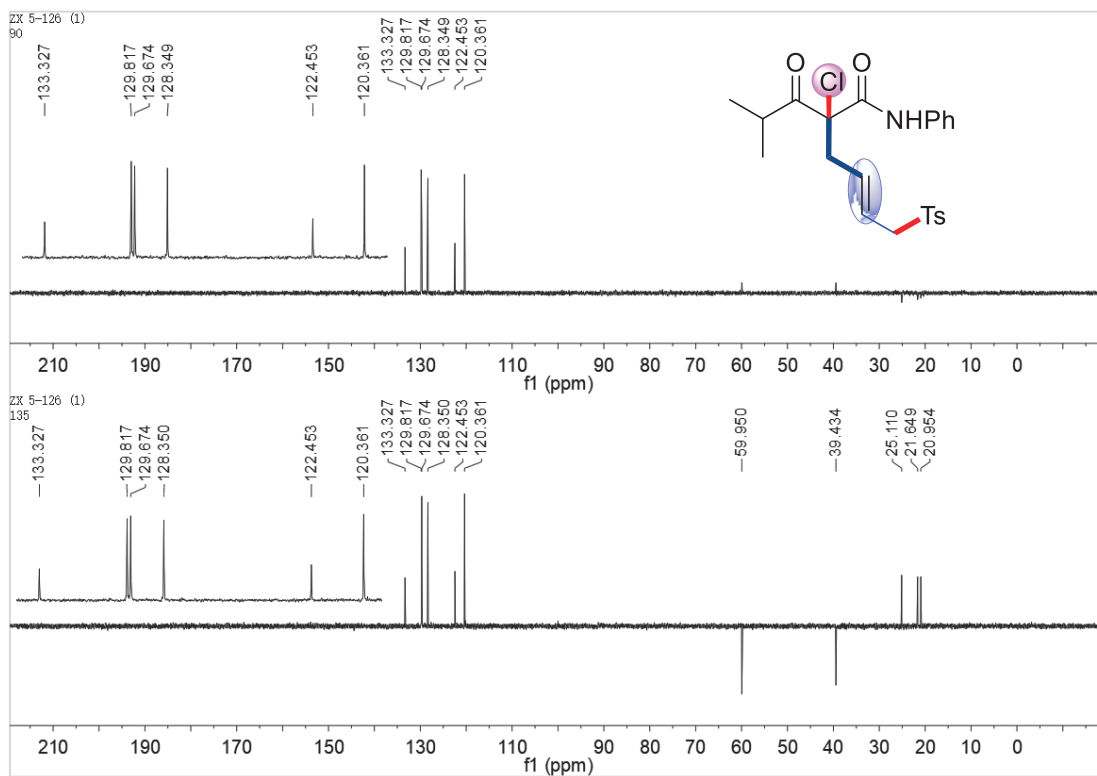

### 3a3, <sup>1</sup>H NMR

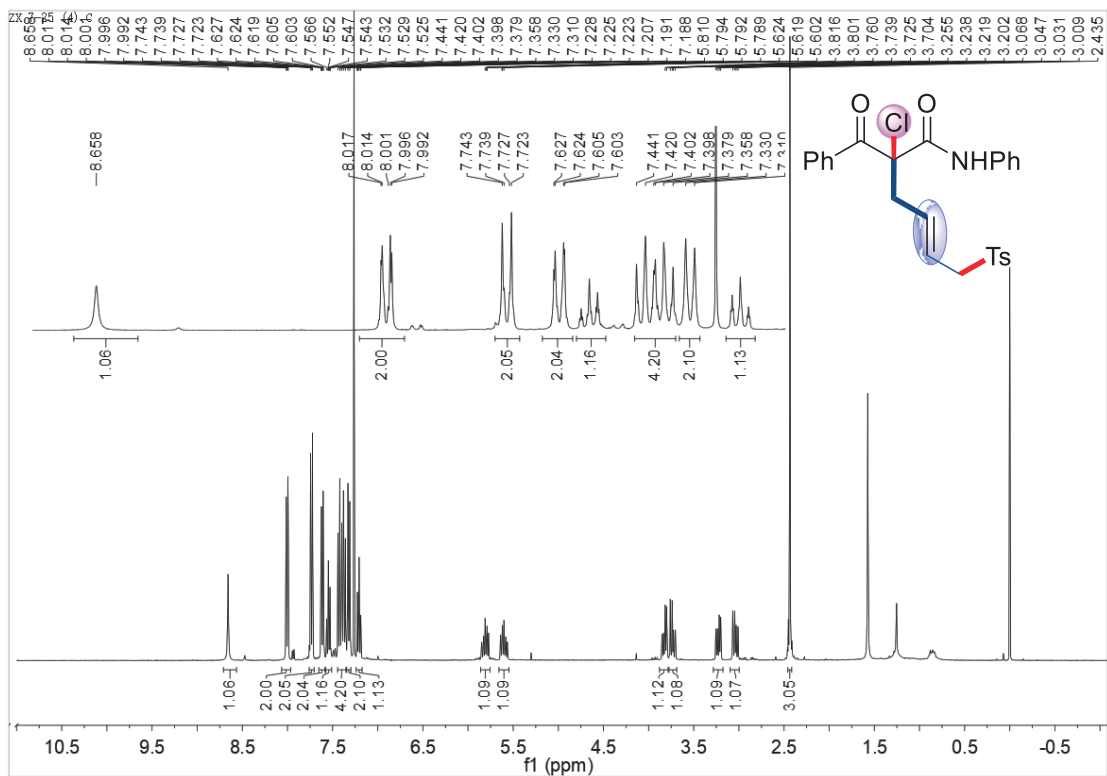

### 3a3, <sup>13</sup>C NMR

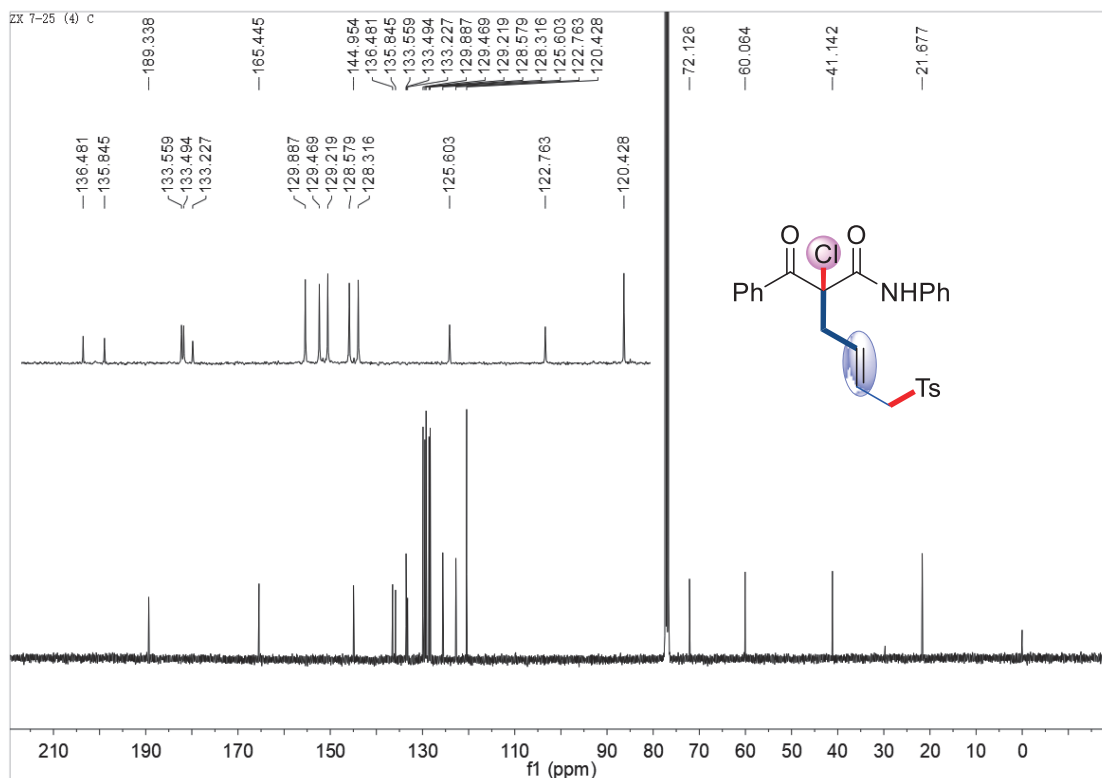

### 3a3 DEPT 90 and DEPT 135

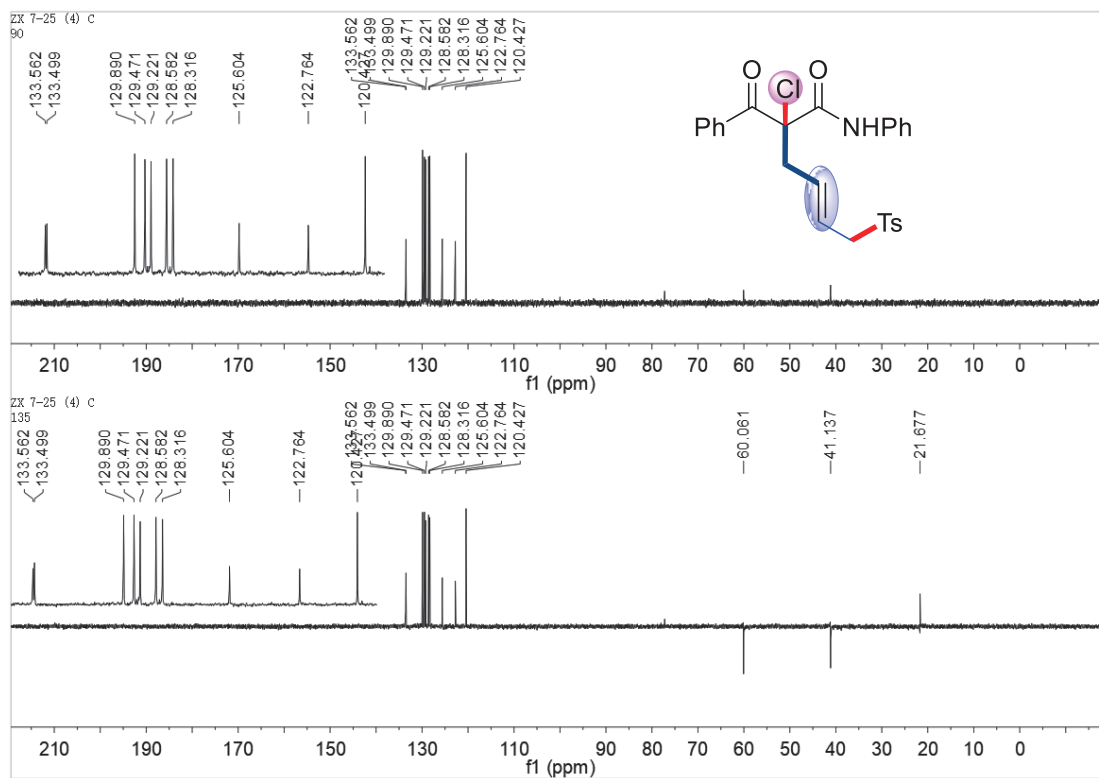

### 3a4, <sup>1</sup>H NMR

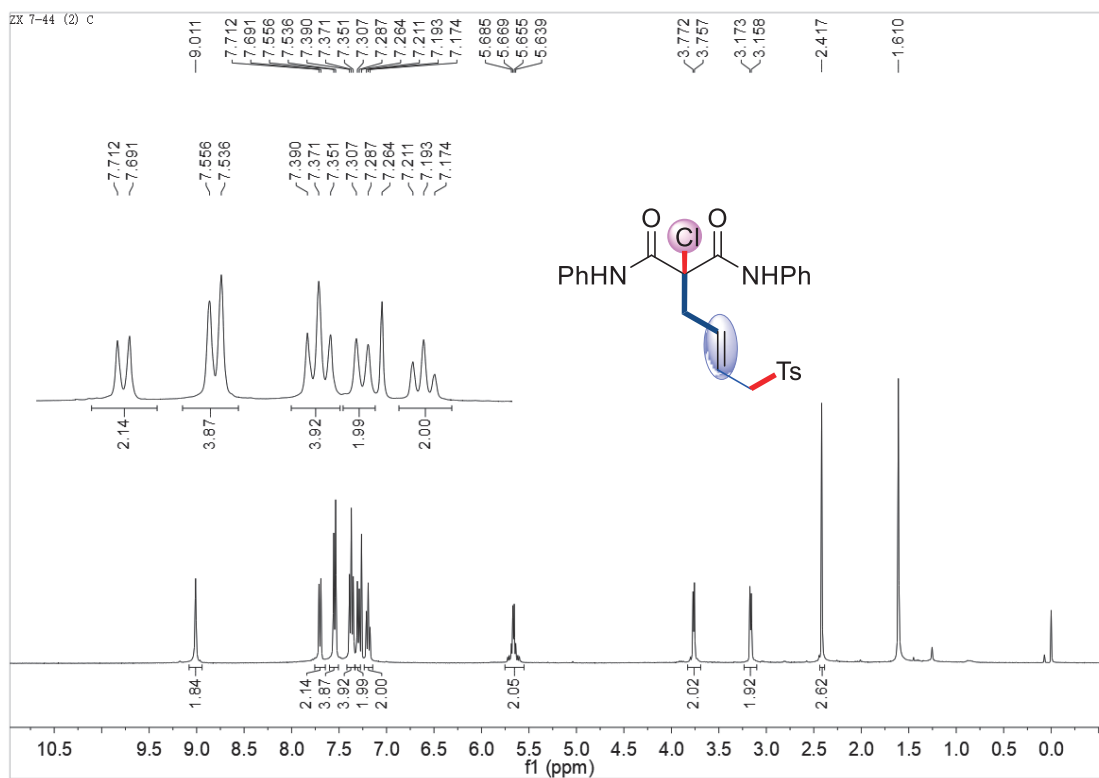

### 3a4, <sup>13</sup>C NMR

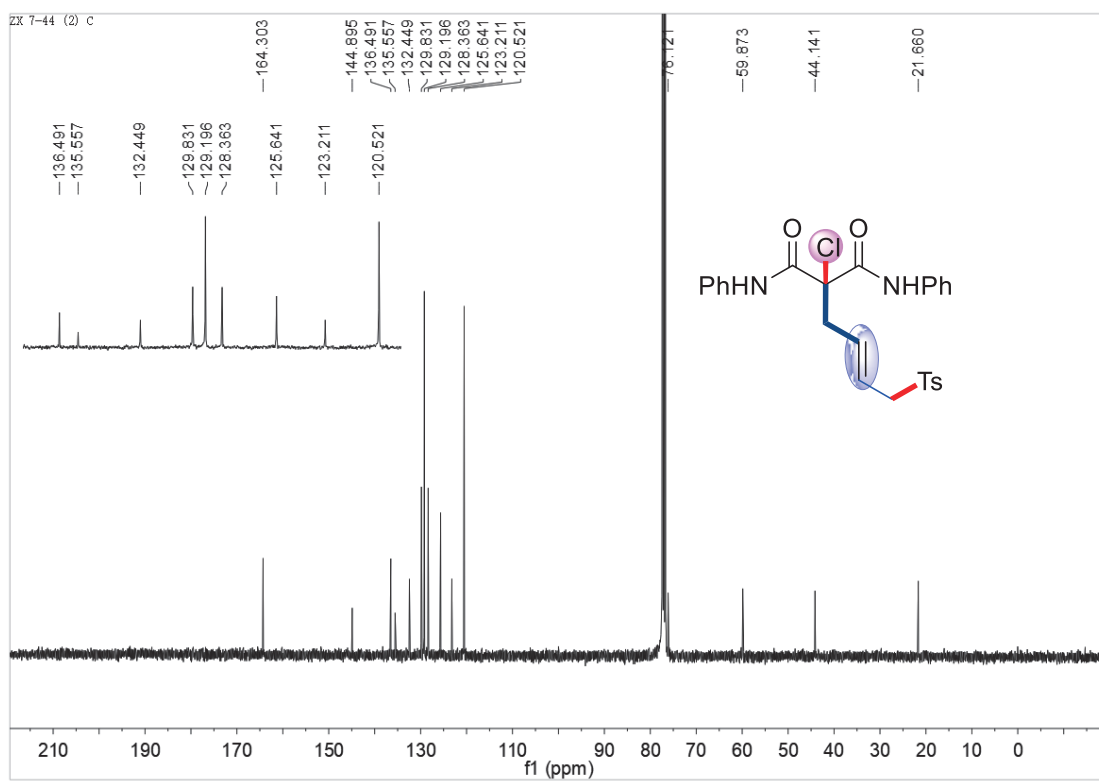

### 3a4 DEPT 90 and DEPT 135

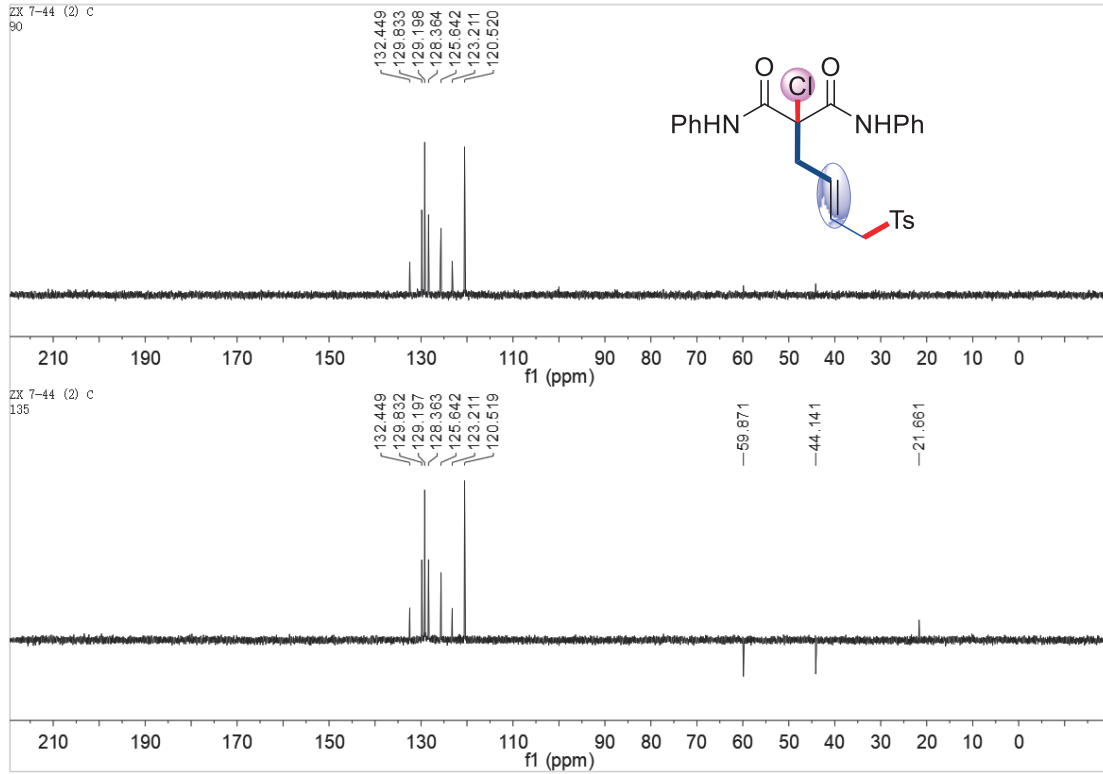

### 3b1, <sup>1</sup>H NMR

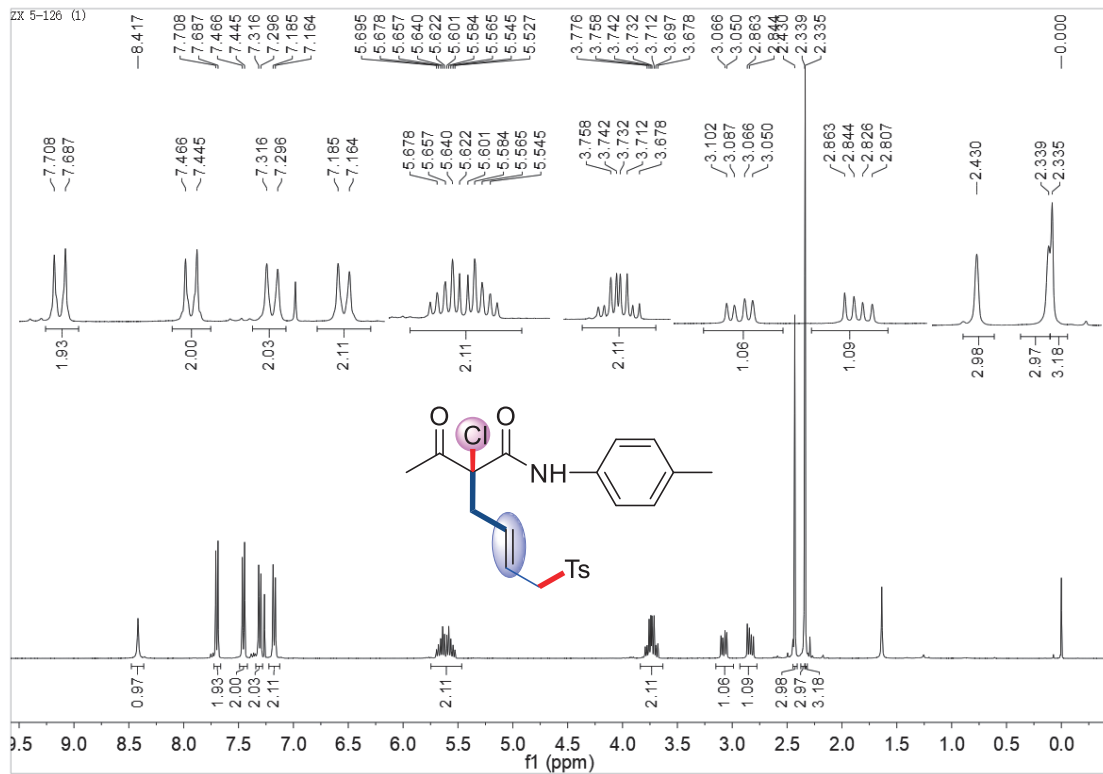

### 3b1, <sup>13</sup>C NMR

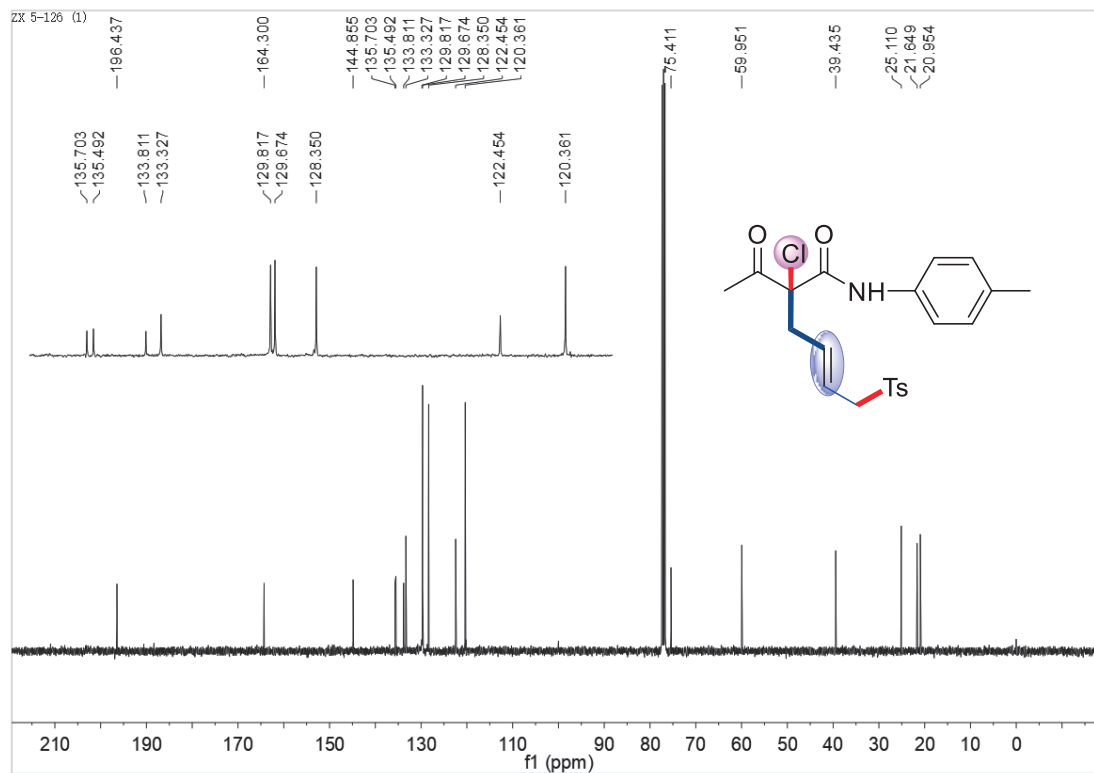

### 3b1 DEPT 90 and DEPT 135

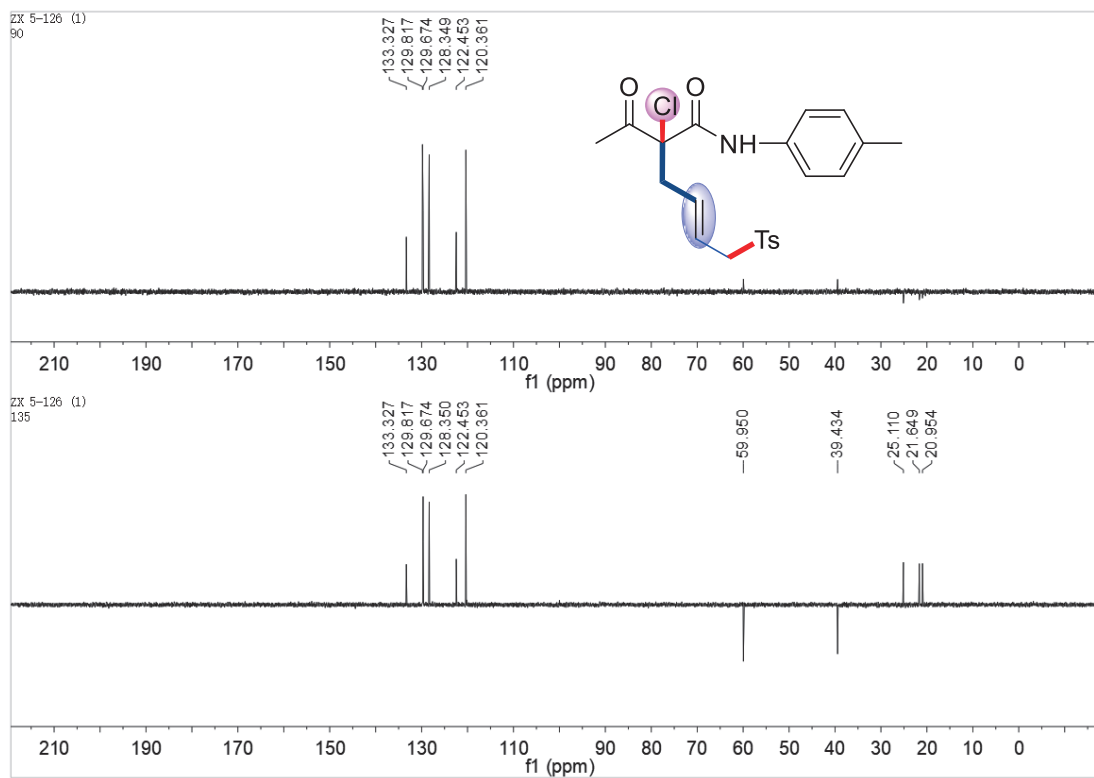

### 3b2, <sup>1</sup>H NMR

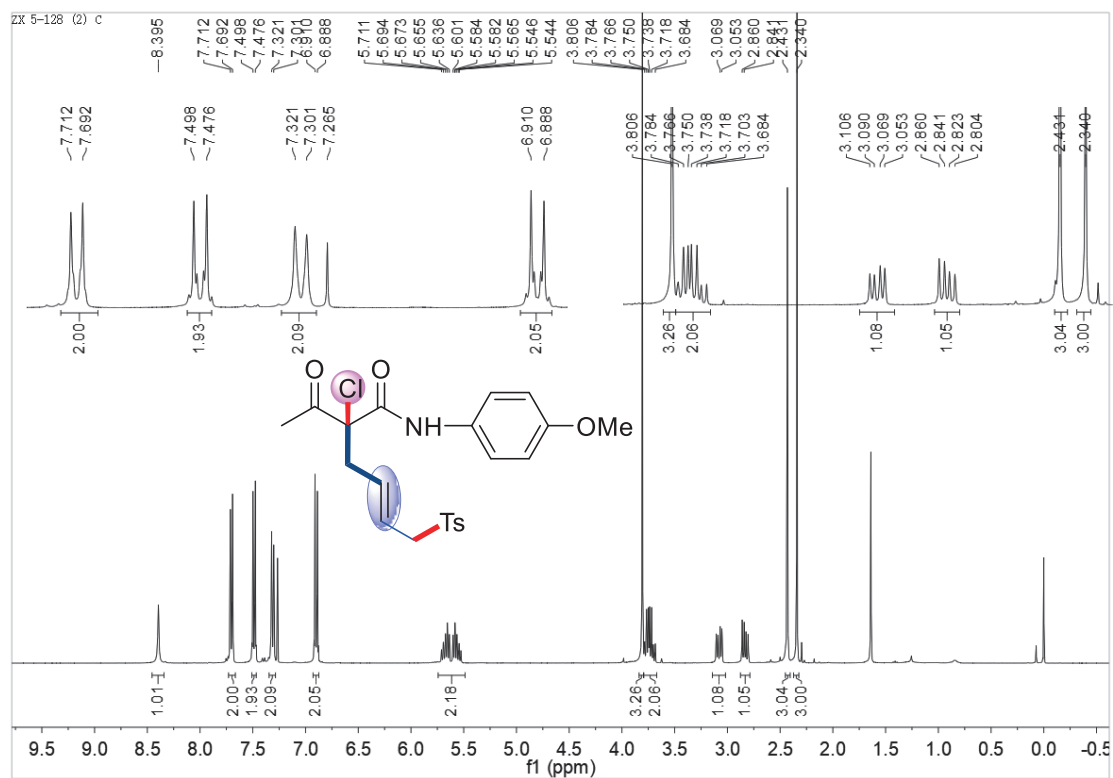

### 3b2, <sup>13</sup>C NMR

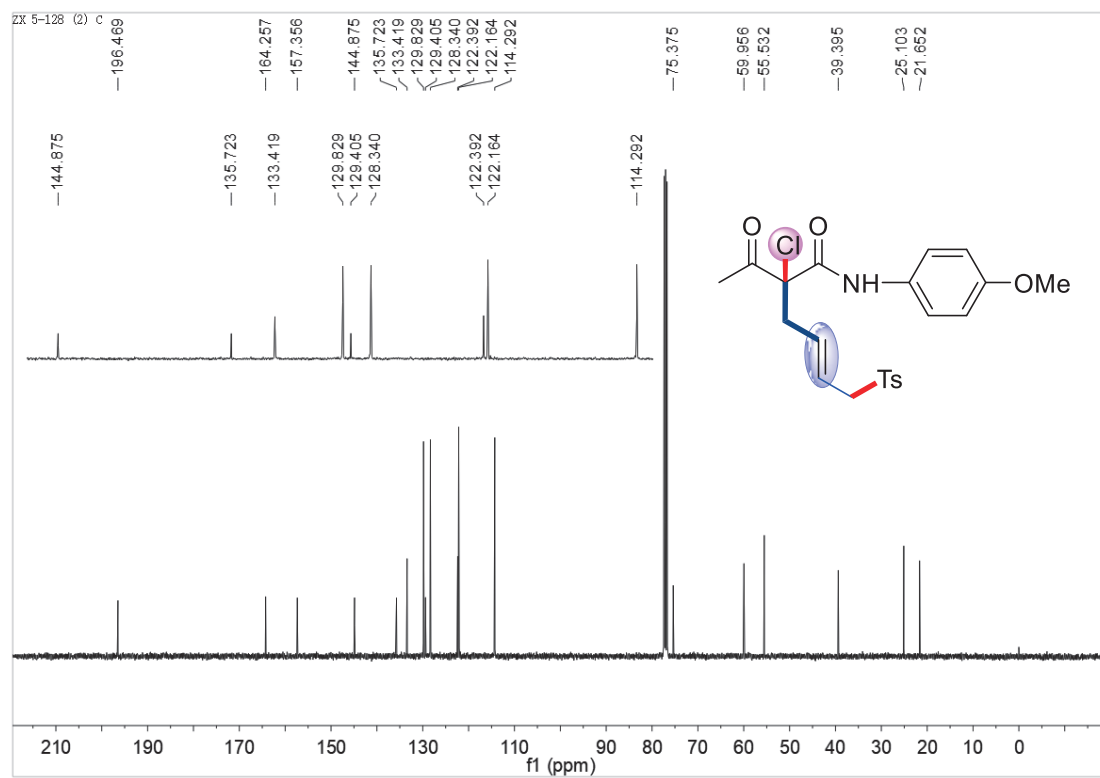

### 3b2 DEPT 90 and DEPT 135

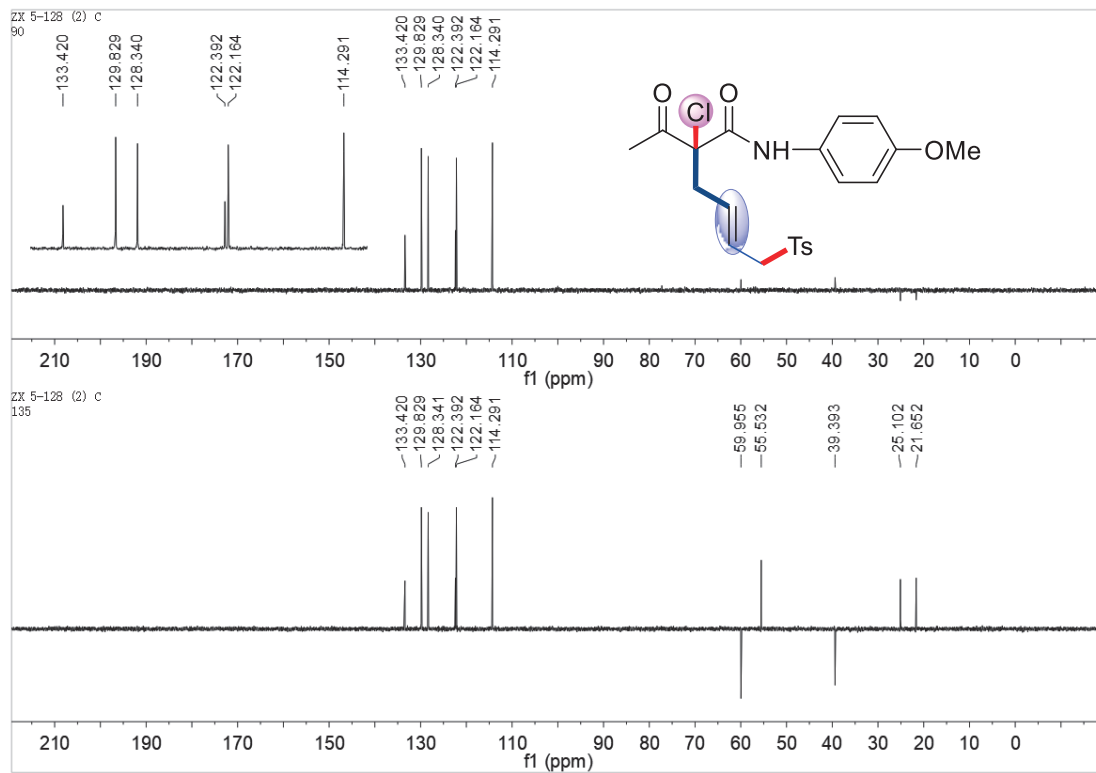

### 3b3, <sup>1</sup>H NMR

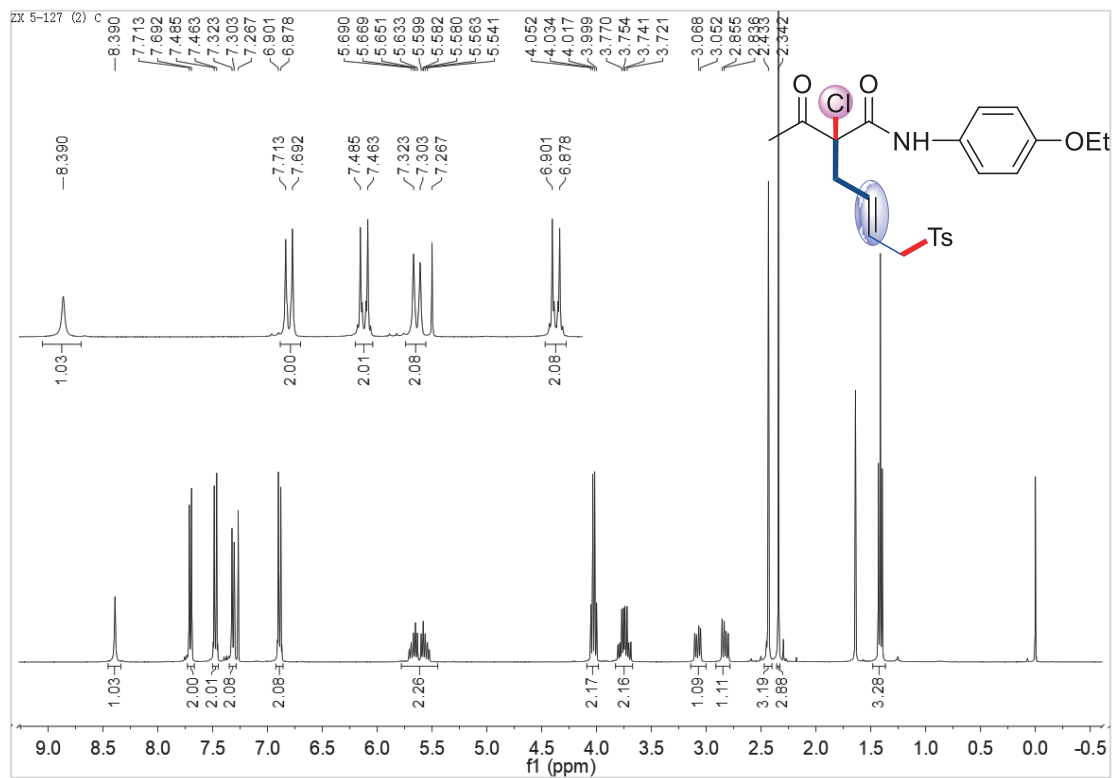



### 3b3, $^{13}\text{C}$ NMR

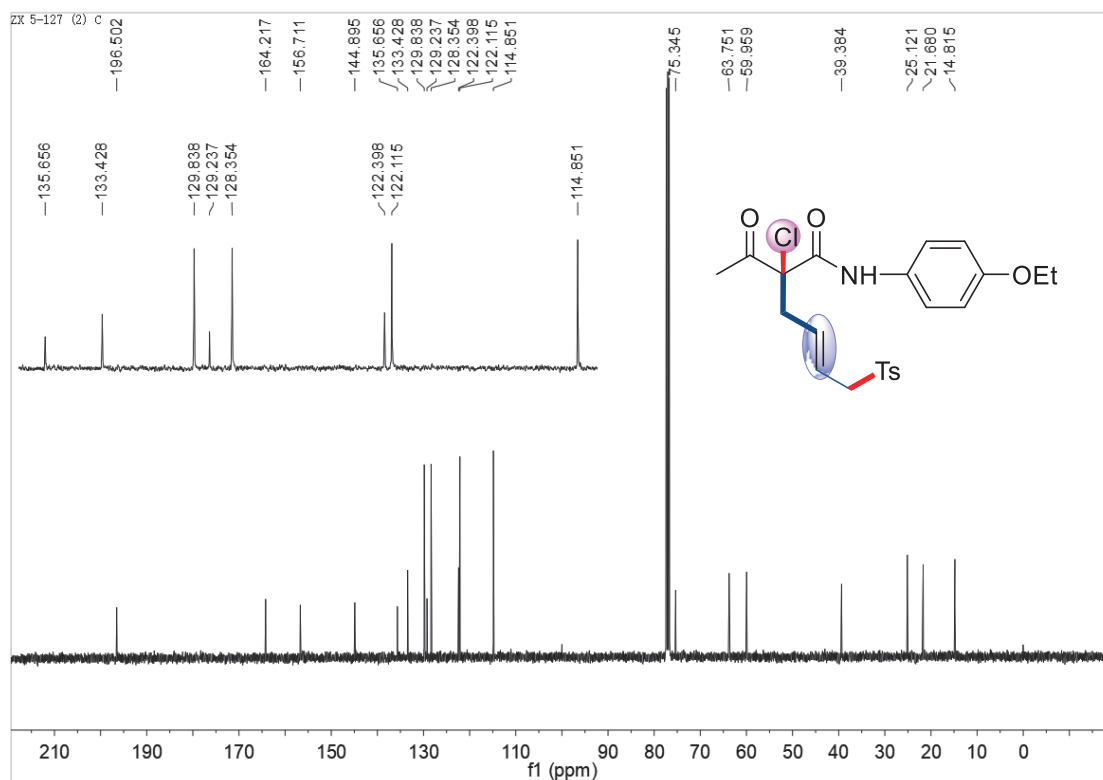

### 3b3 DEPT 90 and DEPT 135

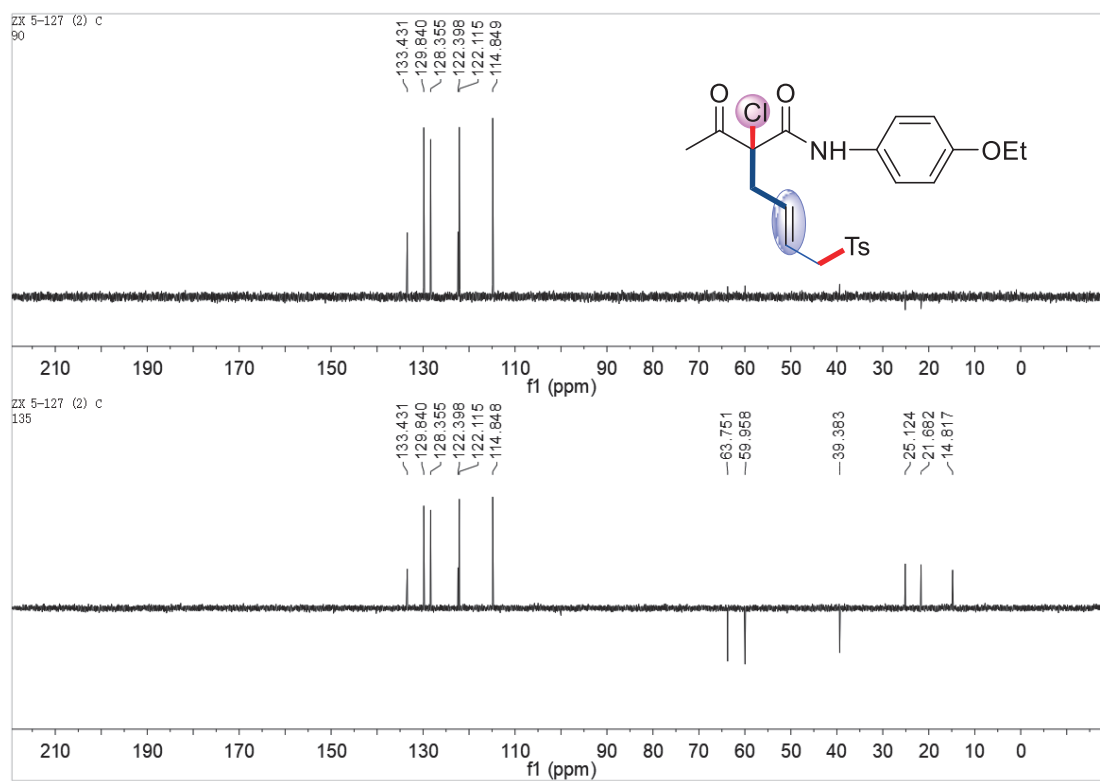

### 3b4, <sup>1</sup>H NMR

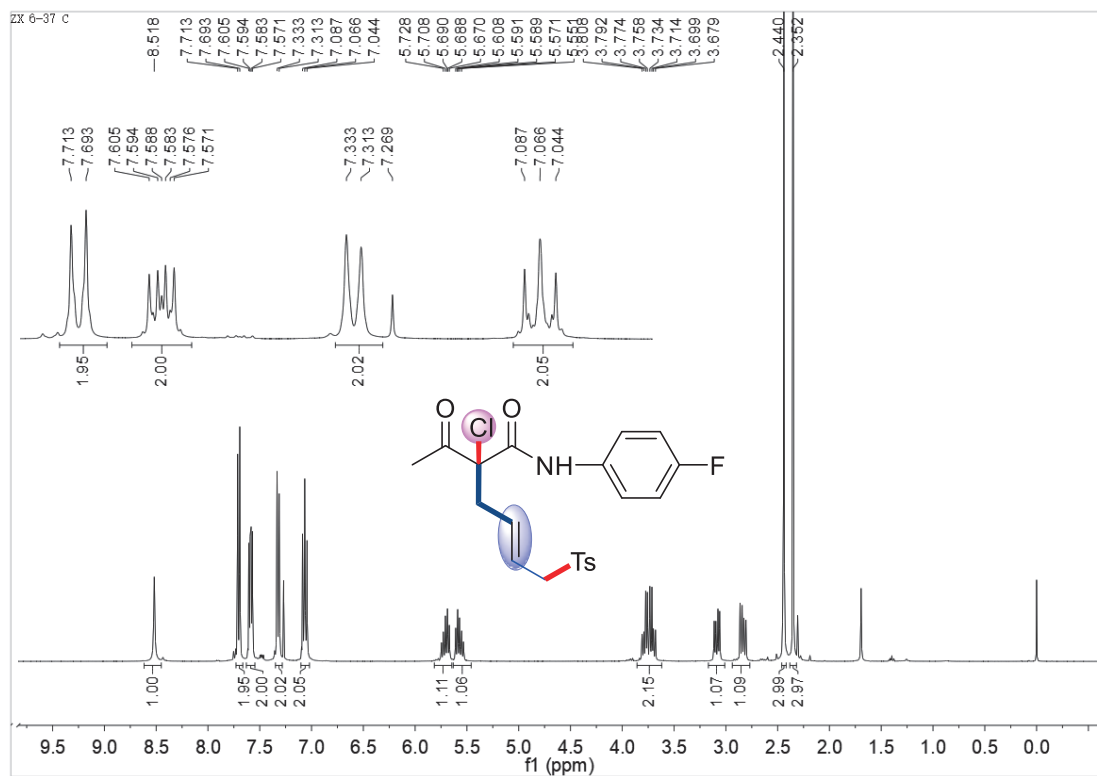

### 3b4, <sup>13</sup>C NMR

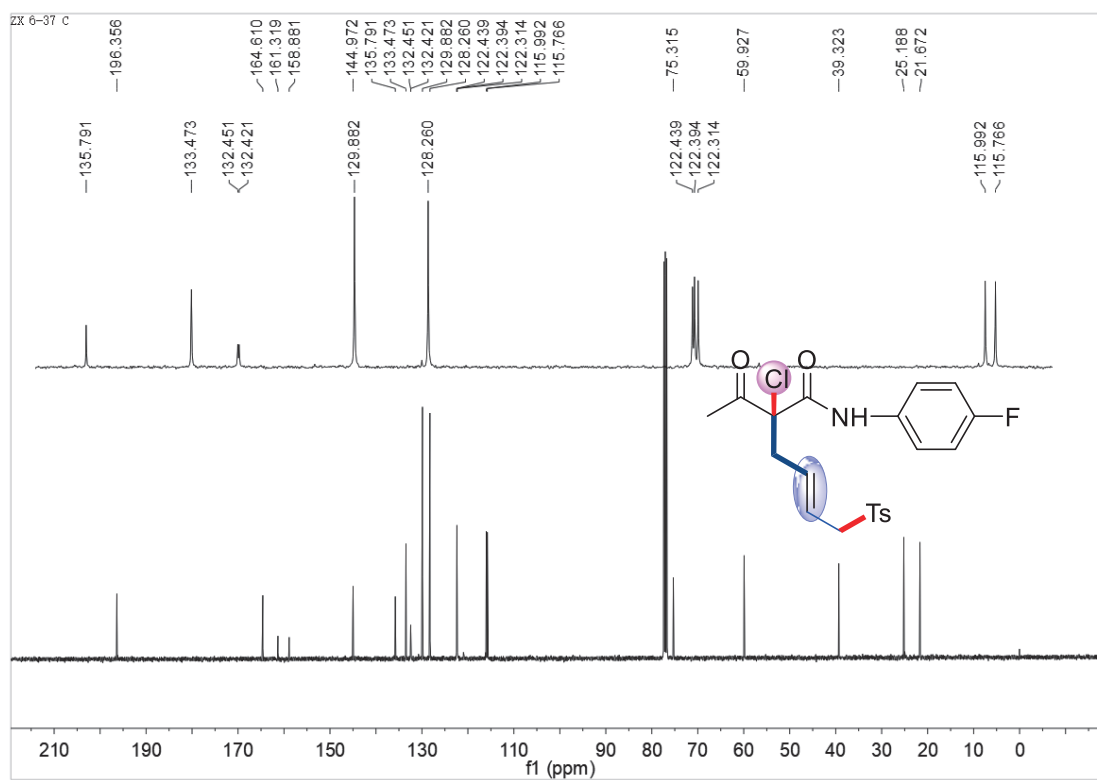

### 3b4 DEPT 90 and DEPT 135

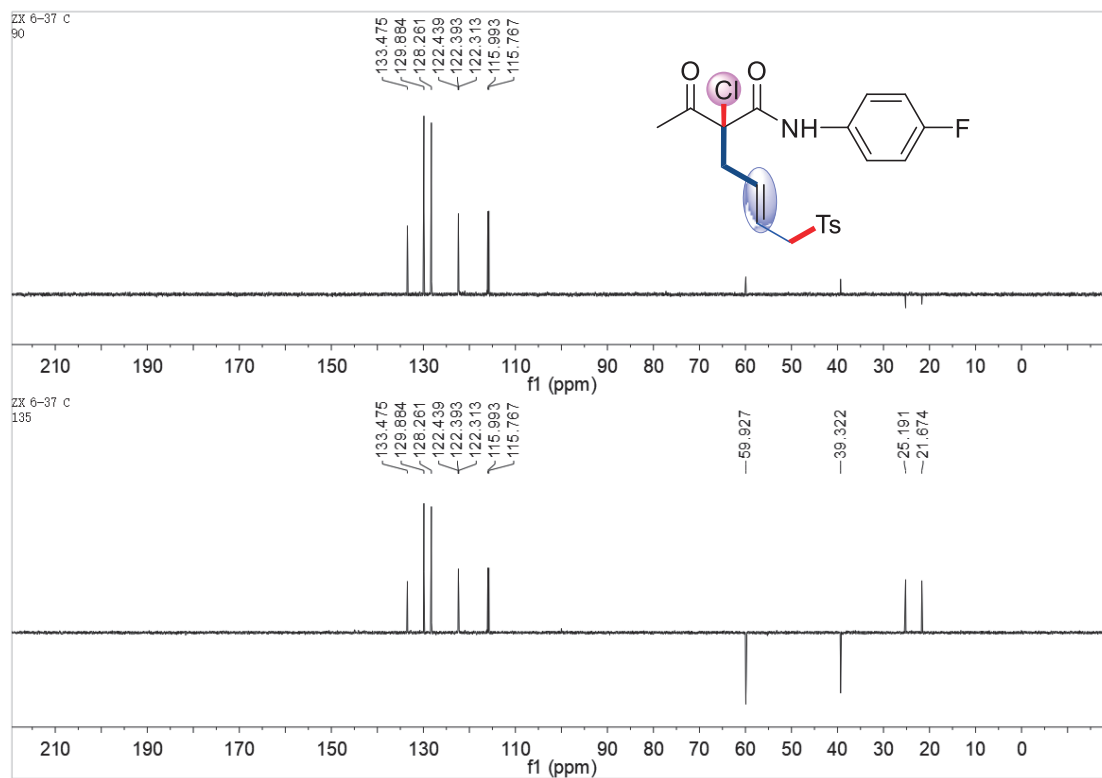

### 3b4 <sup>19</sup>F NMR

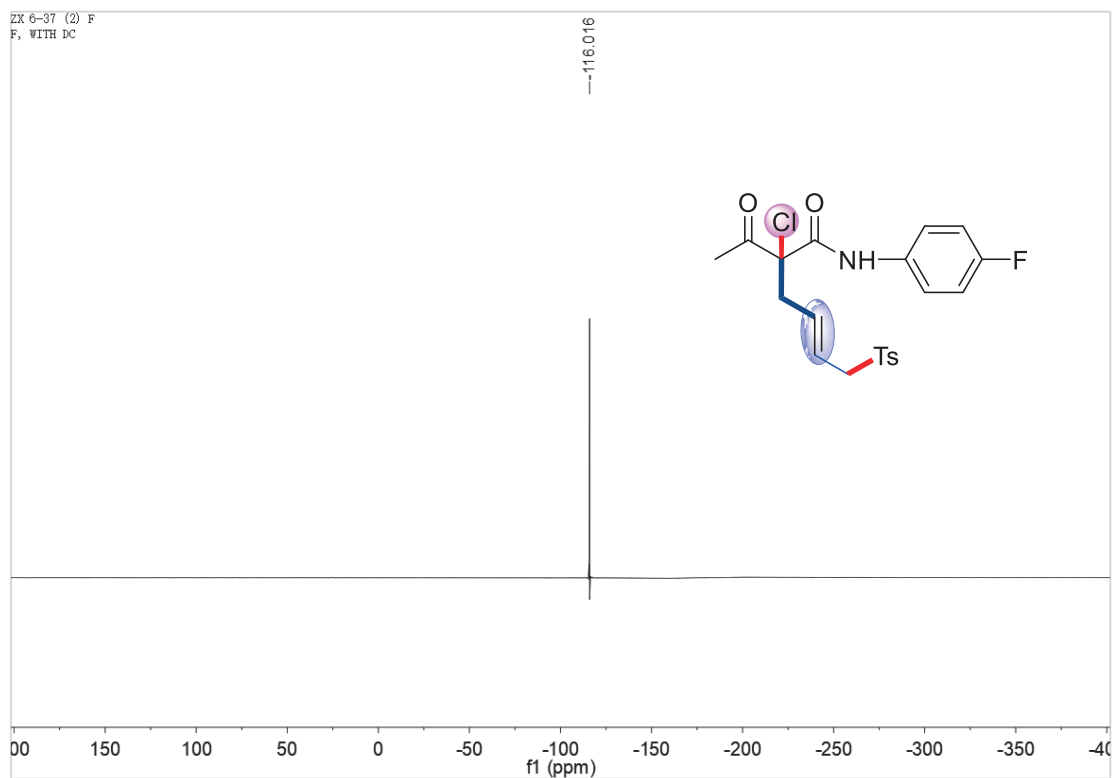

### 3b5, <sup>1</sup>H NMR

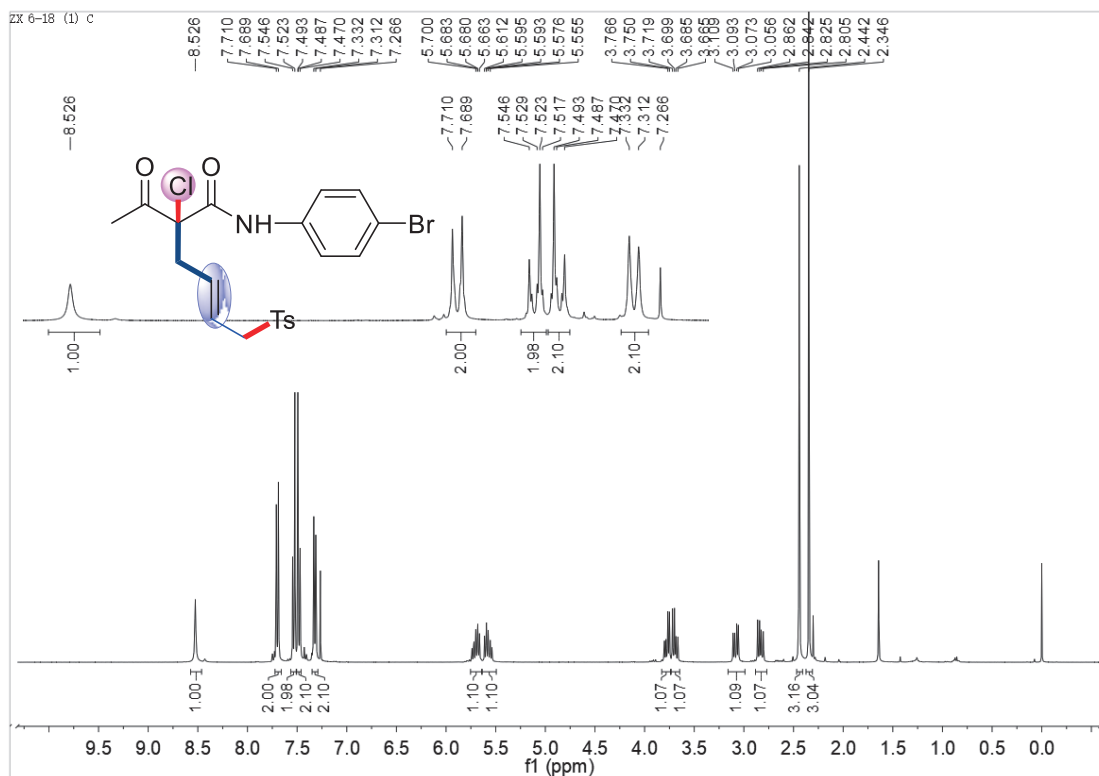

### 3b5, <sup>13</sup>C NMR

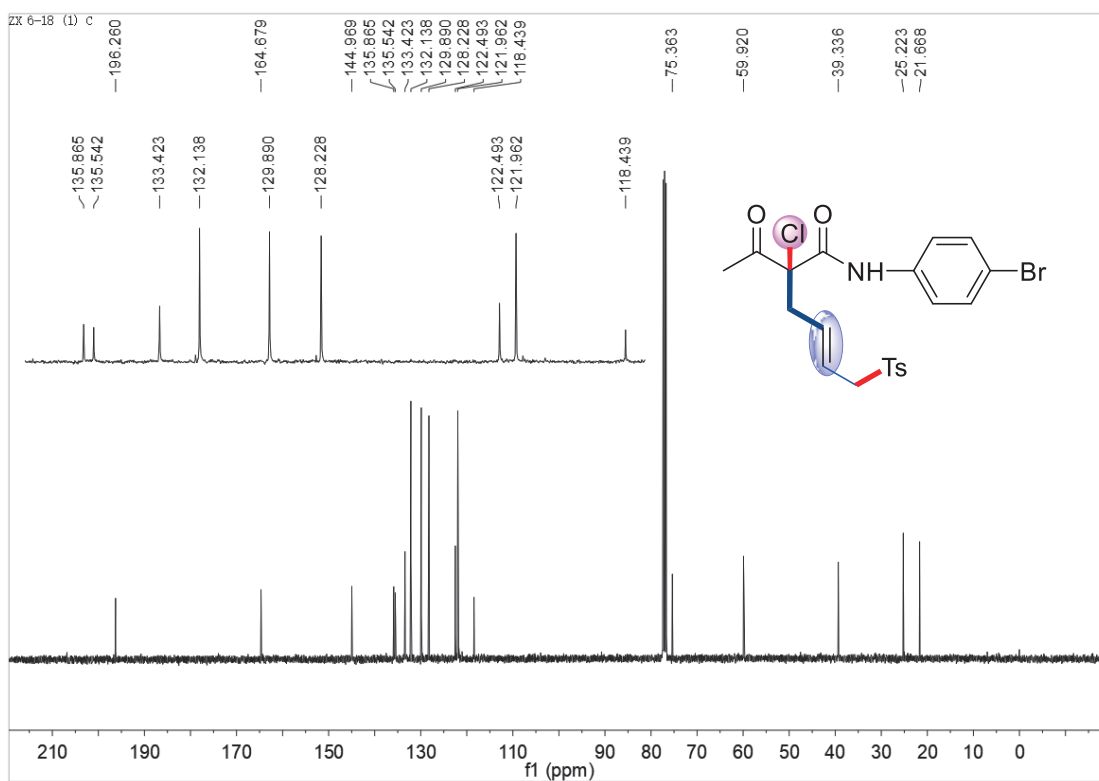

### 3b5 DEPT 90 and DEPT 135

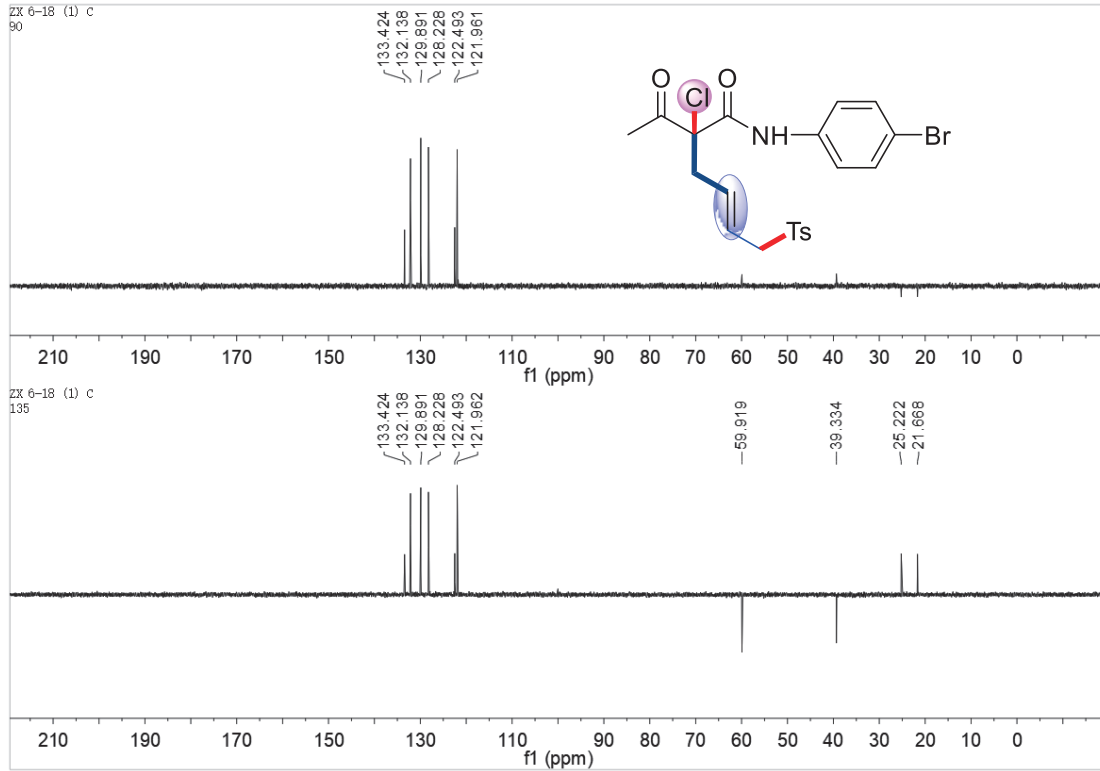

### 3b6, <sup>1</sup>H NMR

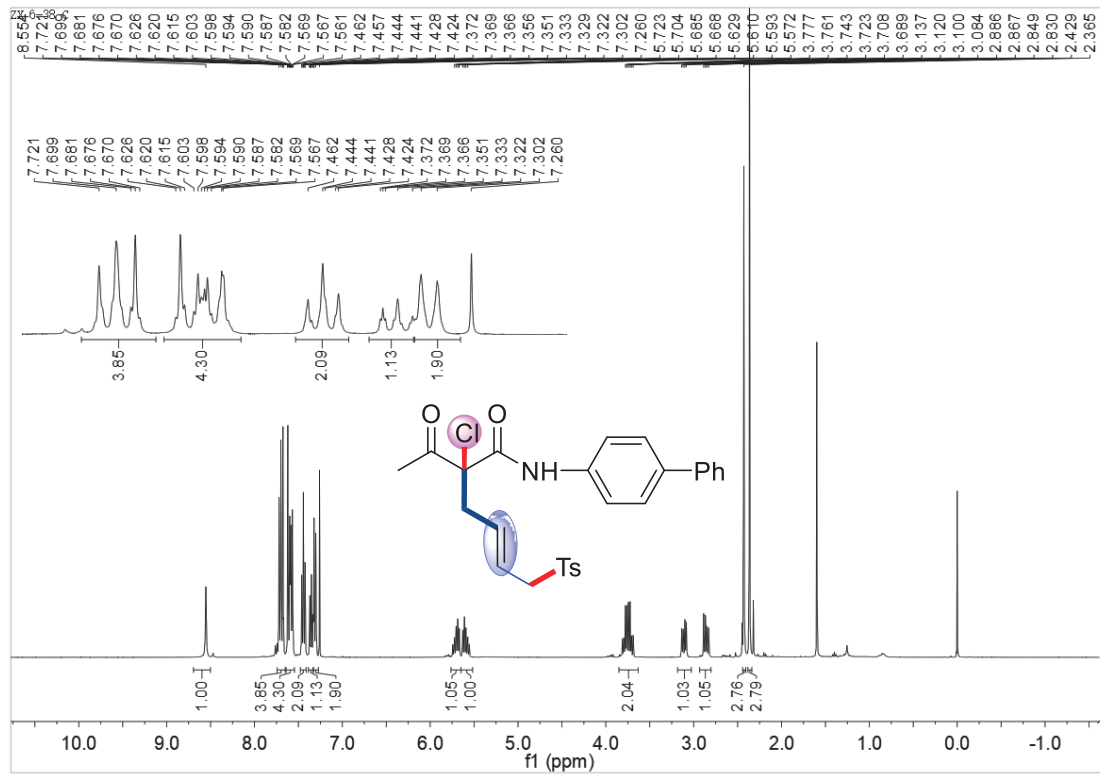

### 3b6, <sup>13</sup>C NMR

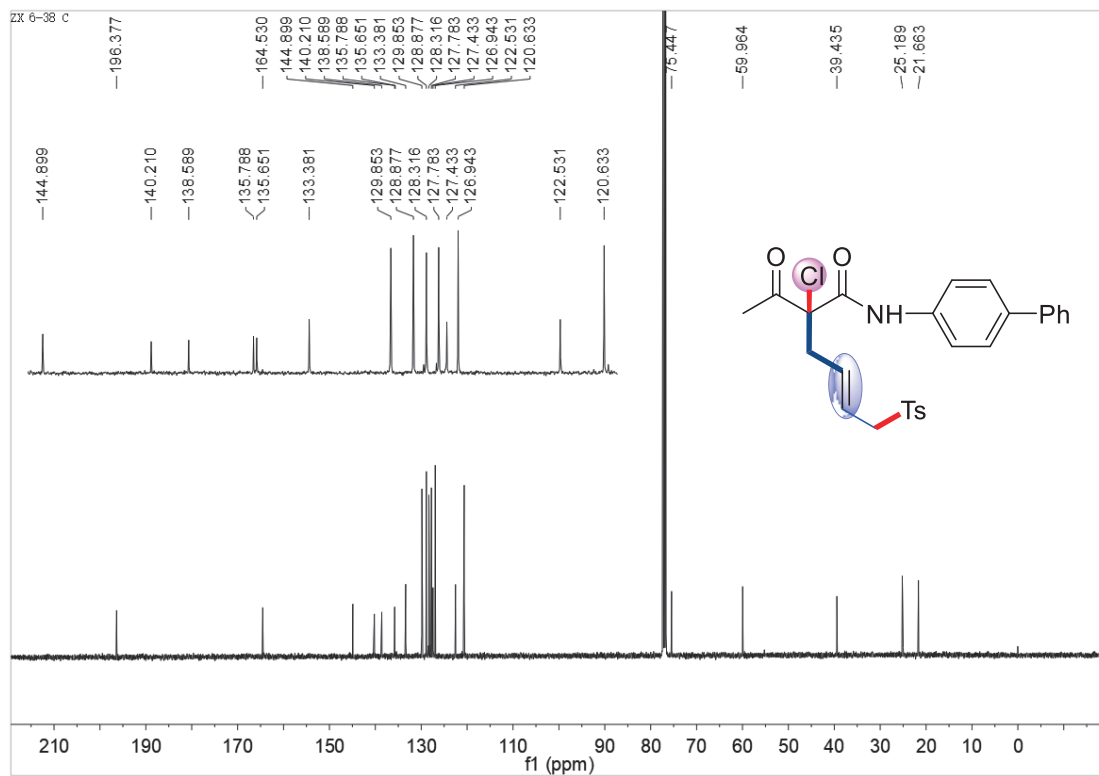

### 3b6 DEPT 90 and DEPT 135

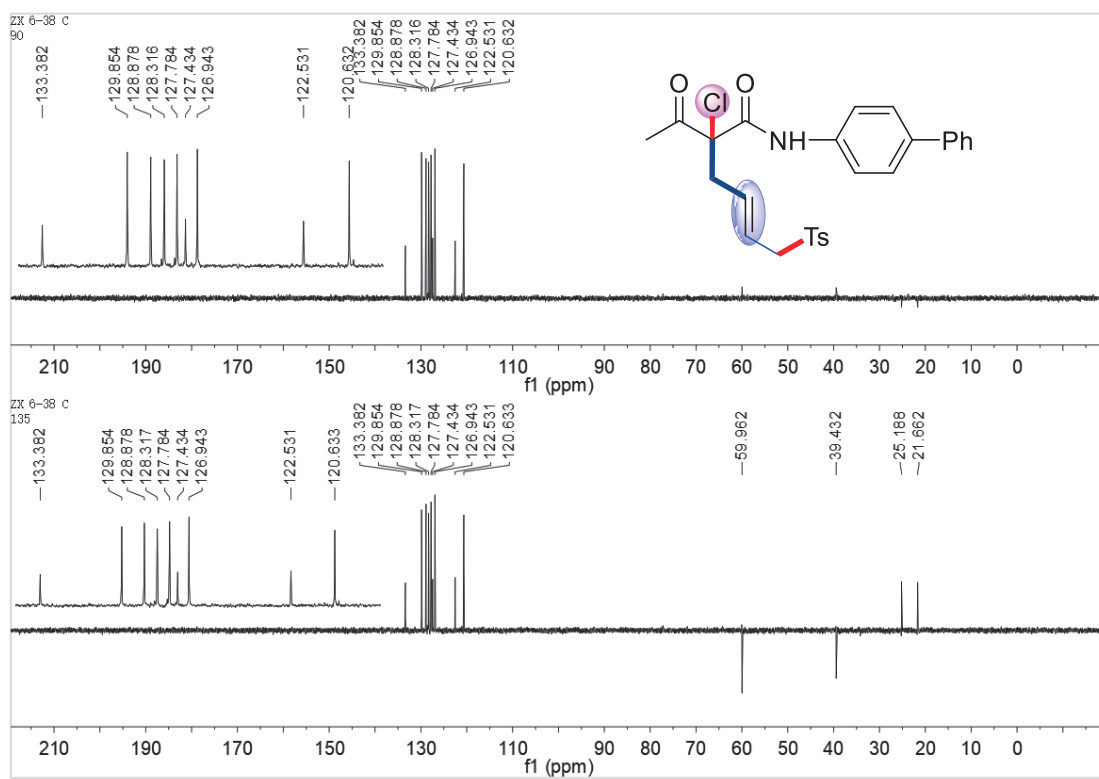

### 3b7, <sup>1</sup>H NMR

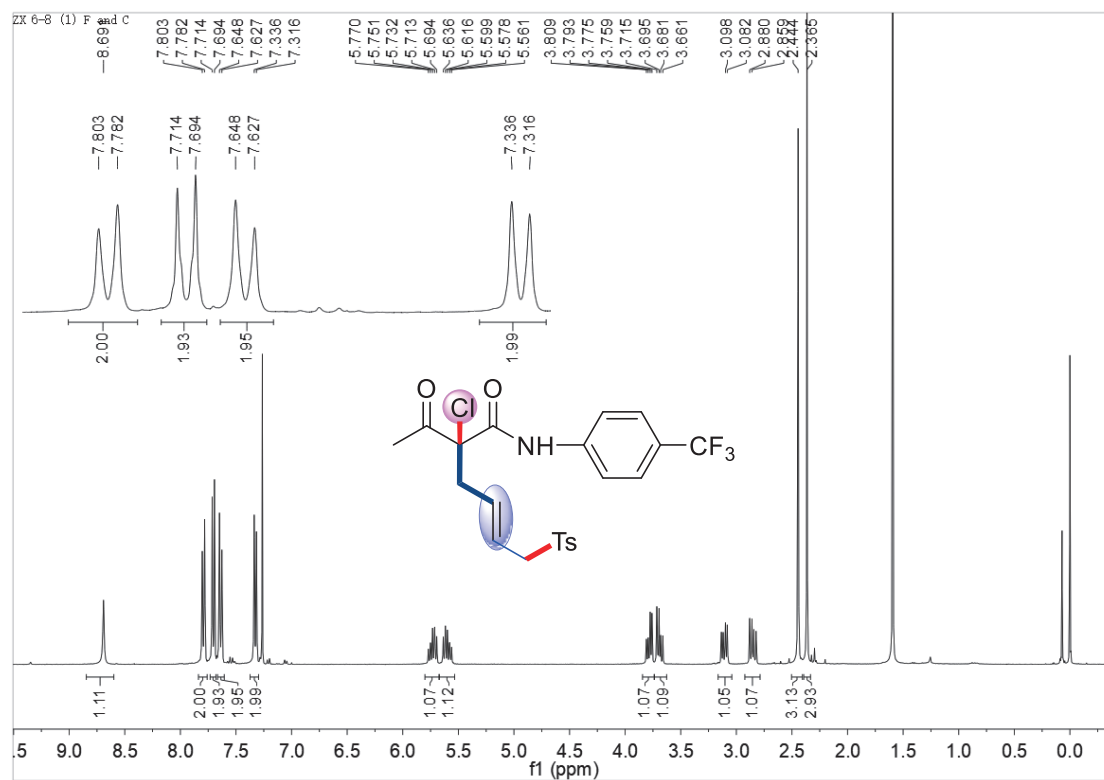

### 3b7, <sup>13</sup>C NMR

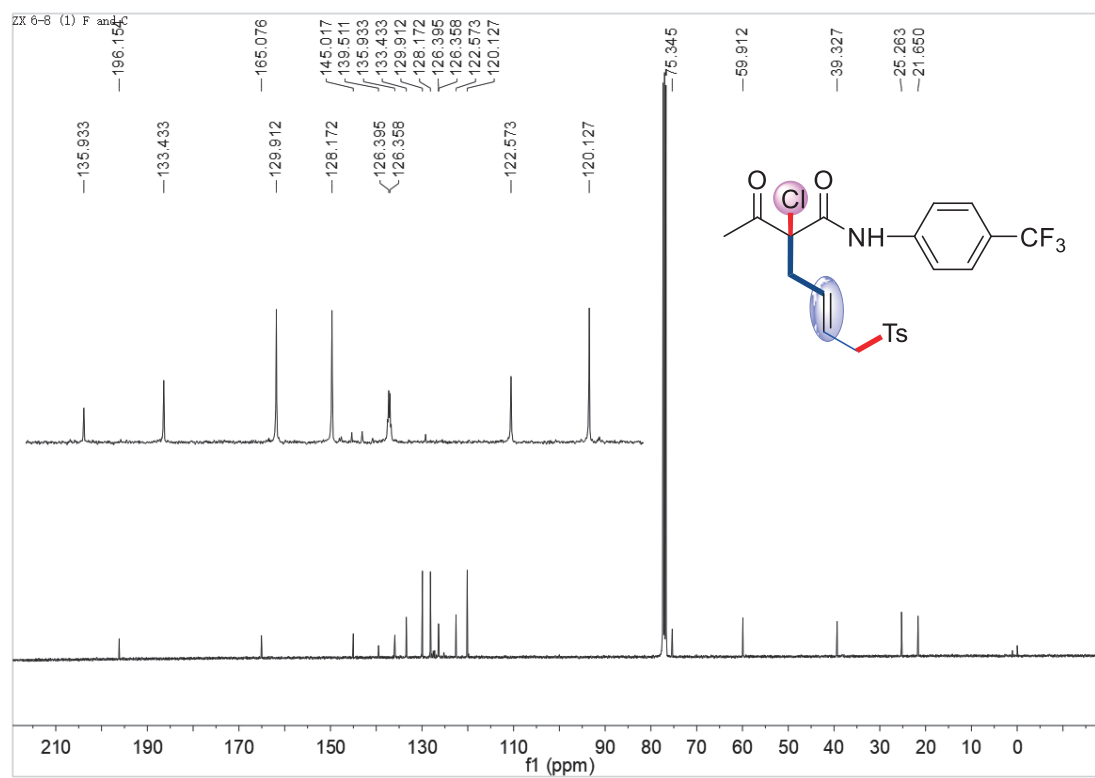

### 3b7 DEPT 90 and DEPT 135

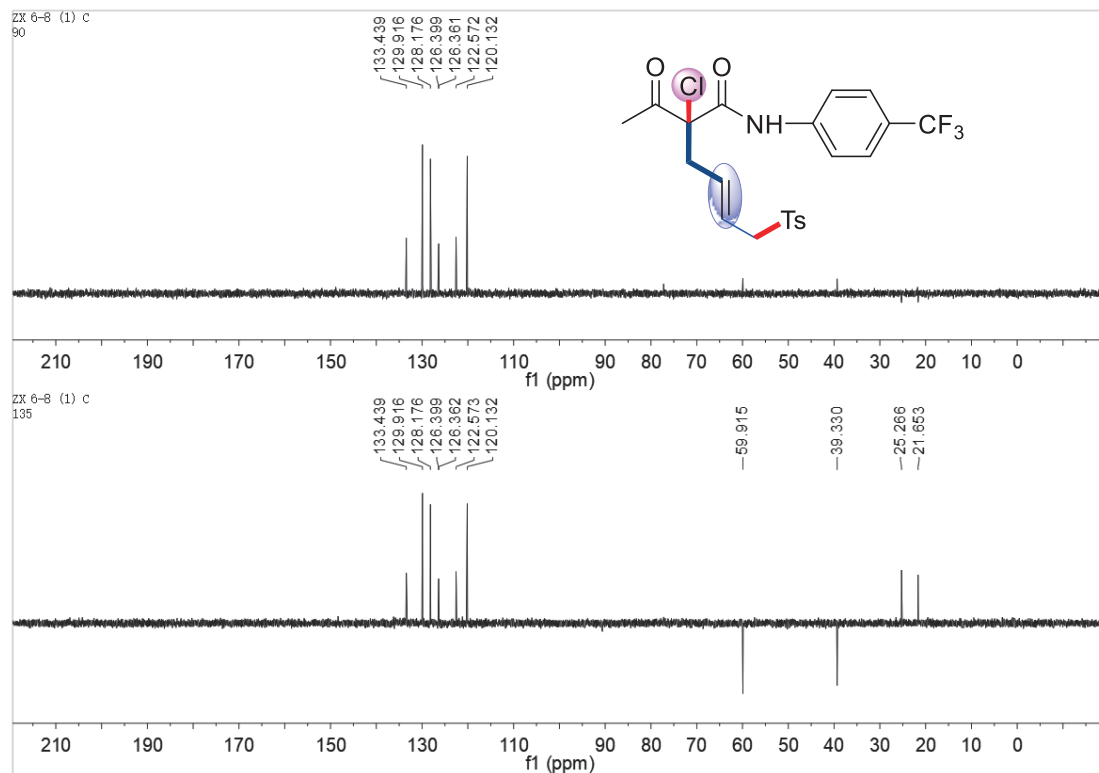

### 3b7 <sup>19</sup>F NMR

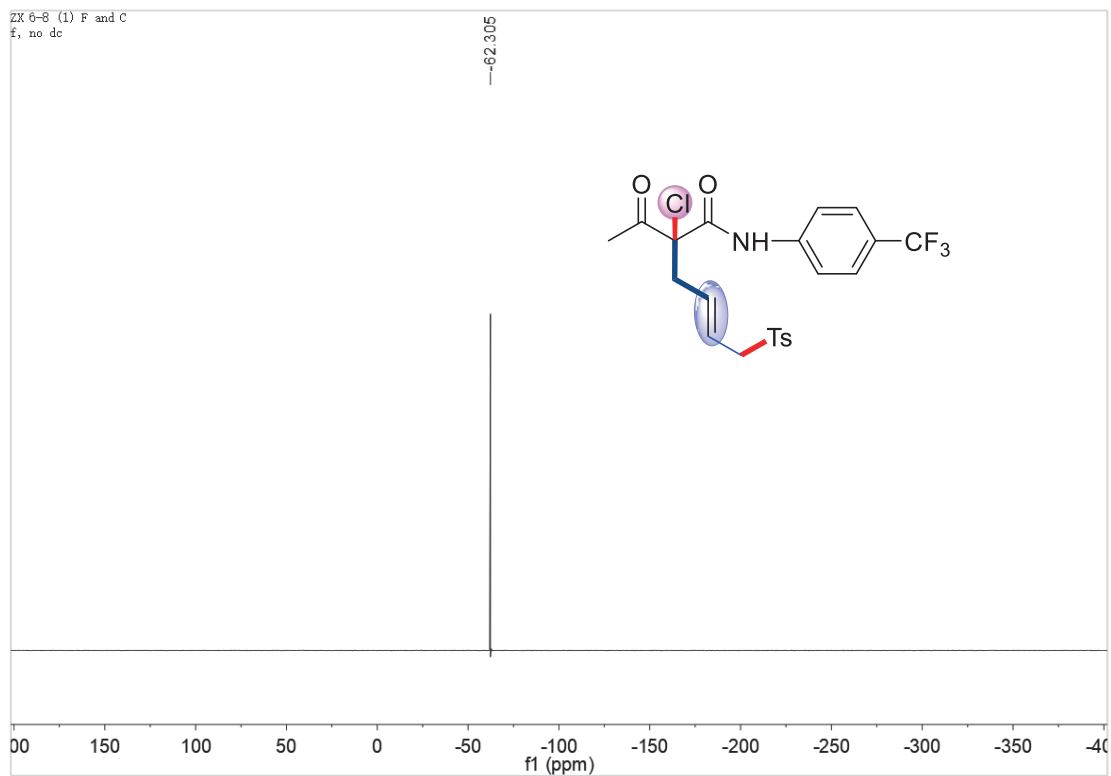



### 3b8, <sup>1</sup>H NMR

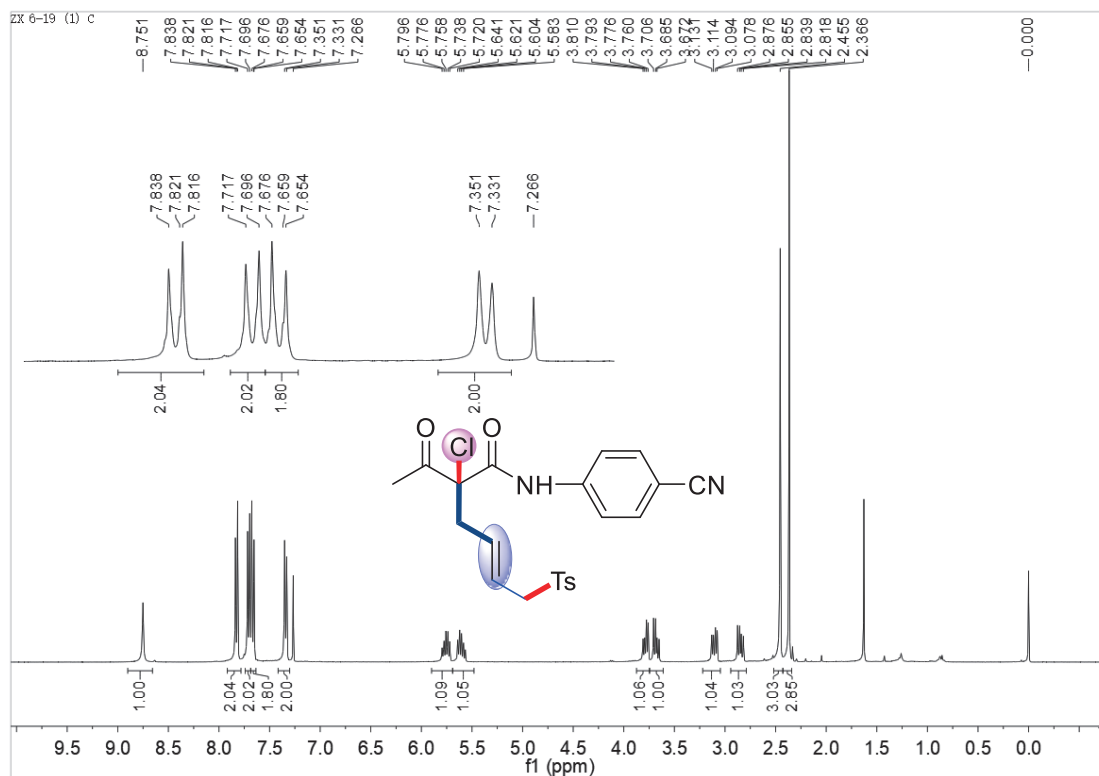

### 3b8, <sup>13</sup>C NMR

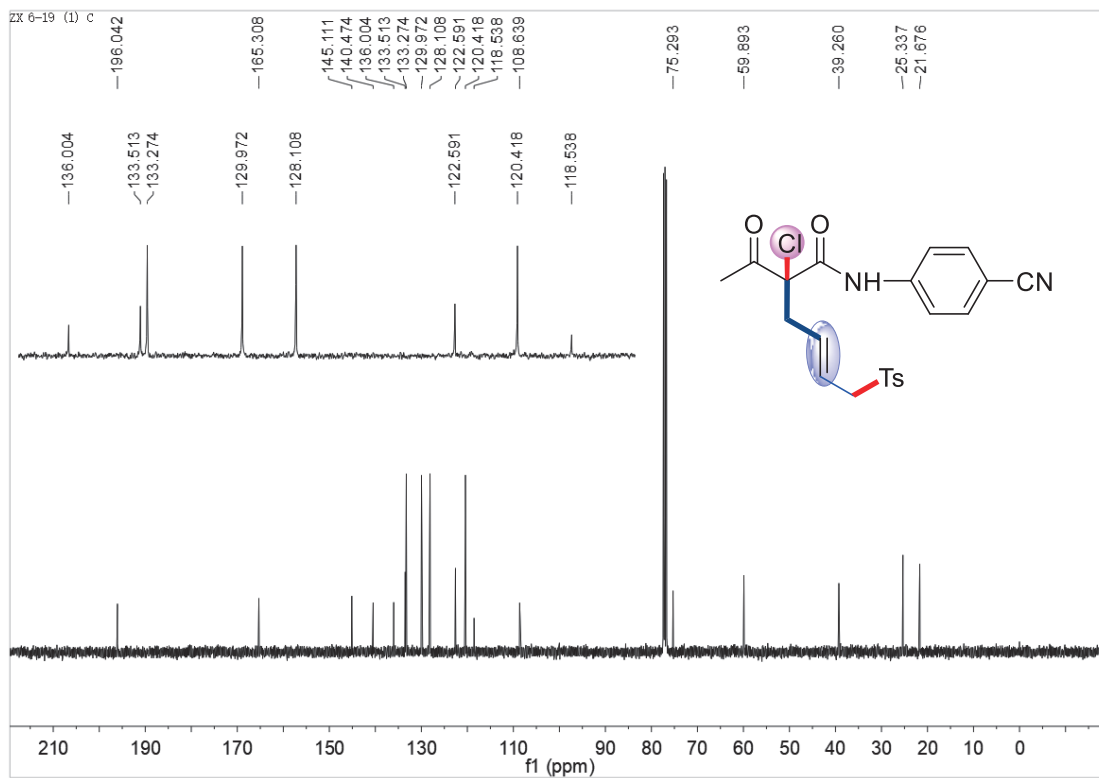

### 3b8 DEPT 90 and DEPT 135

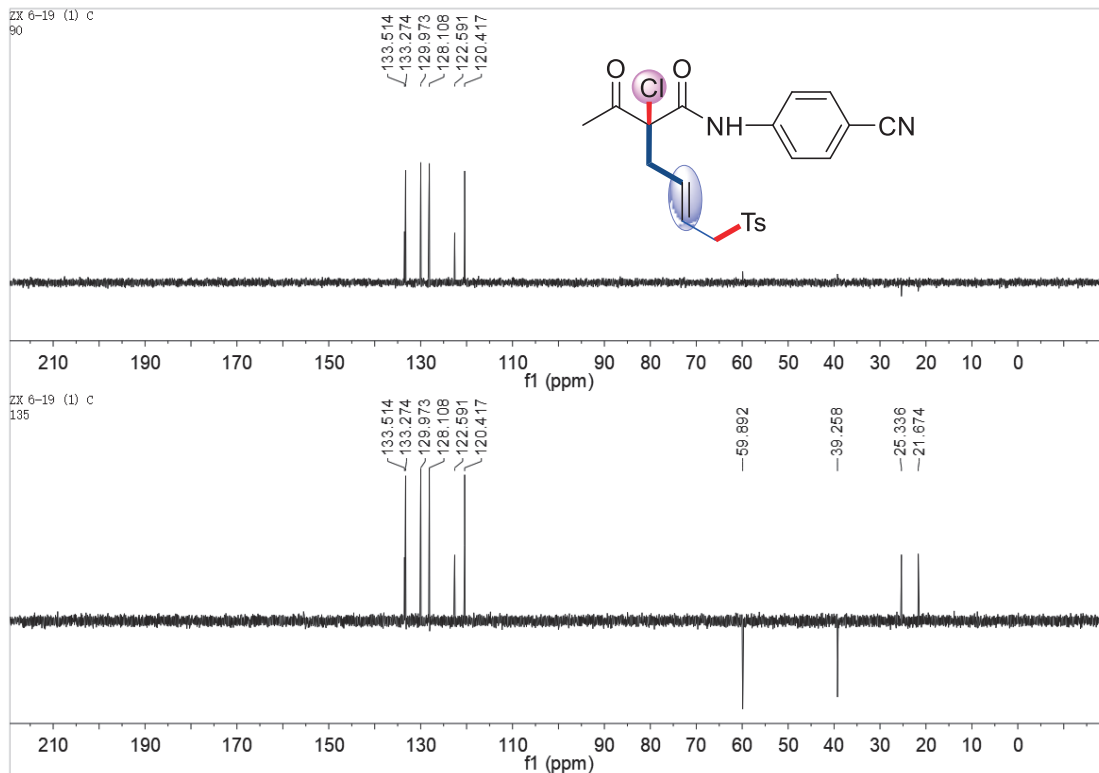

### 3b9, <sup>1</sup>H NMR

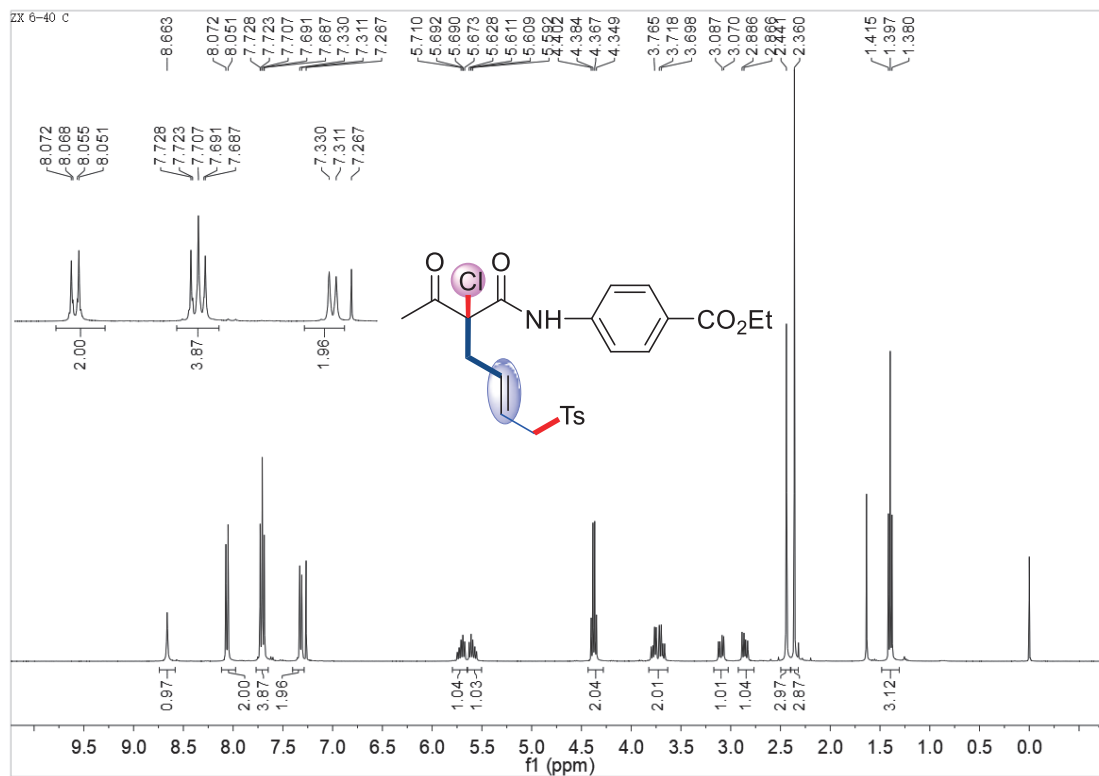

### 3b9, <sup>13</sup>C NMR

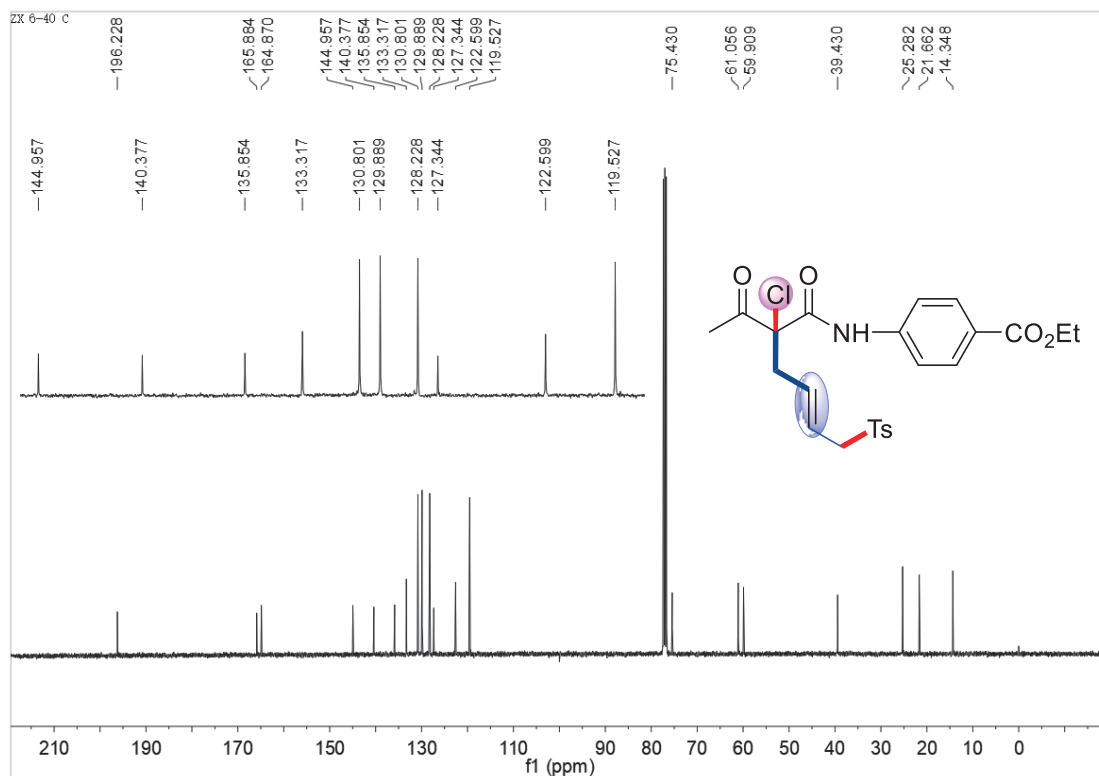

### 3b9 DEPT 90 and DEPT 135

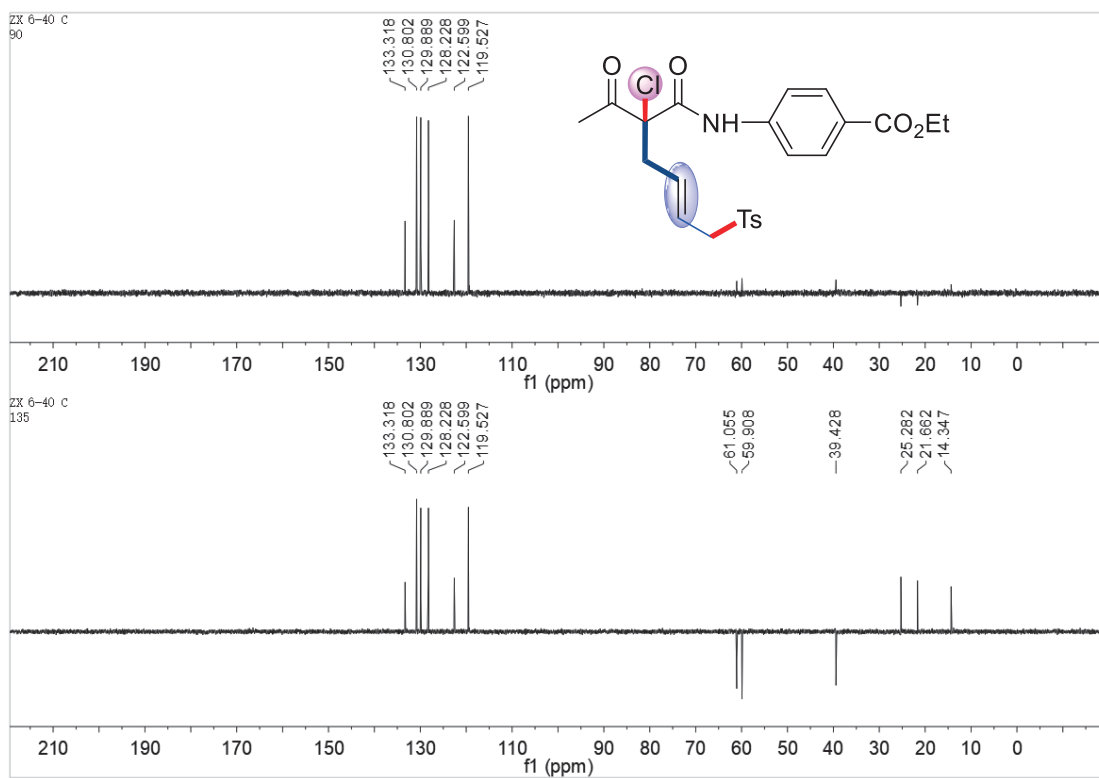

### 3c, <sup>1</sup>H NMR

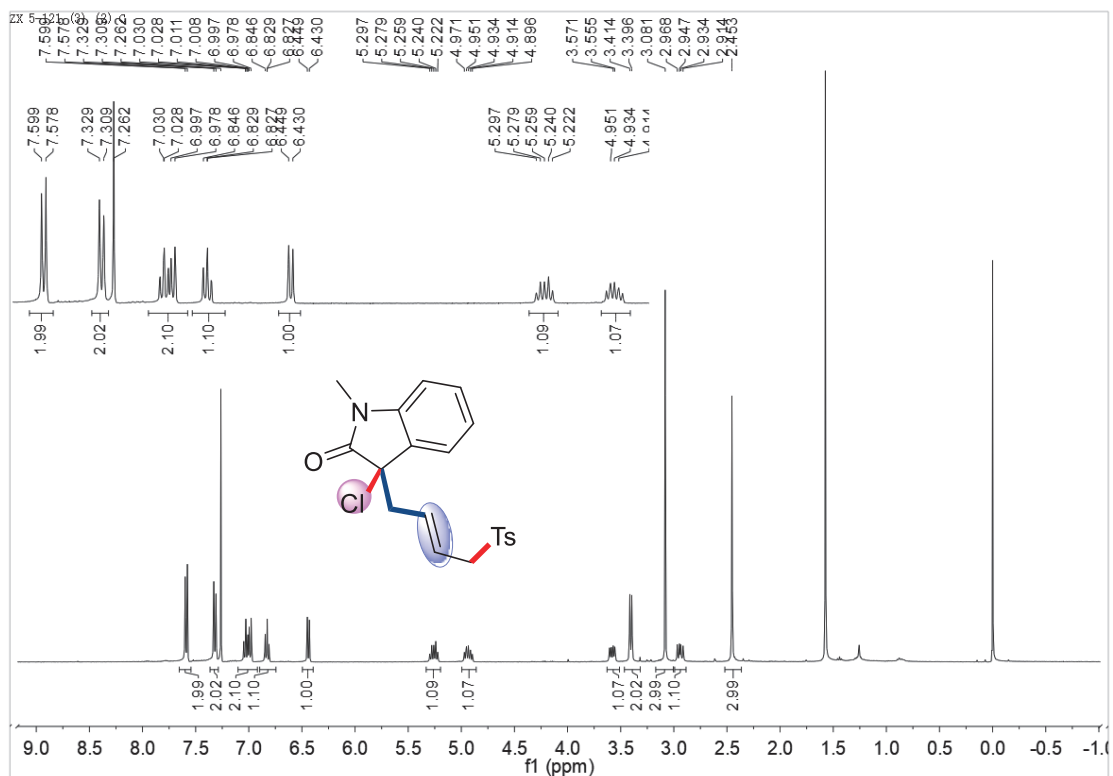

### 3c, <sup>13</sup>C NMR

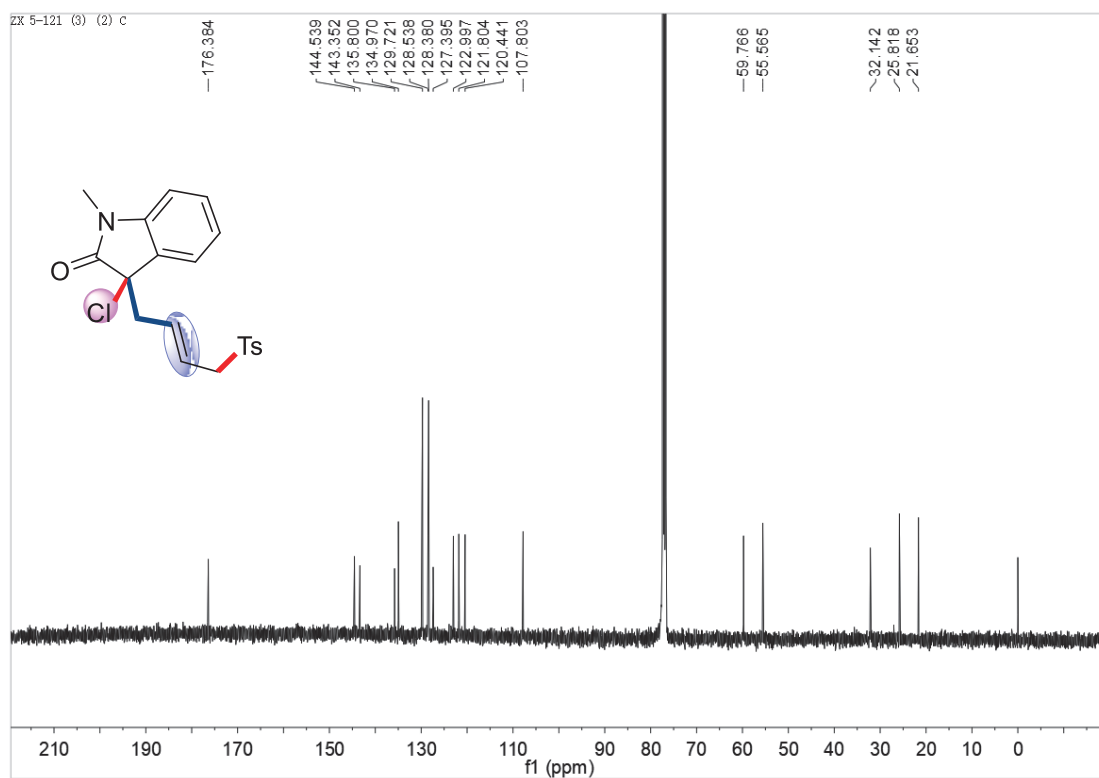

### 3c DEPT 90 and DEPT 135

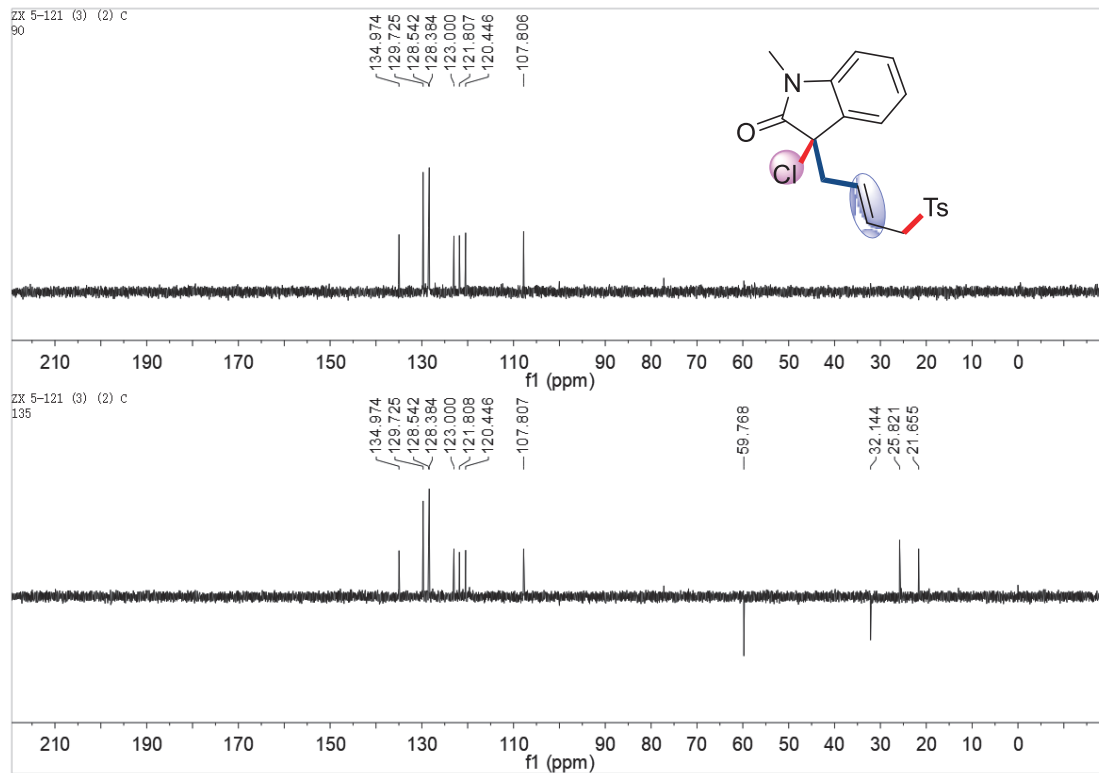

### 3d1, <sup>1</sup>H NMR

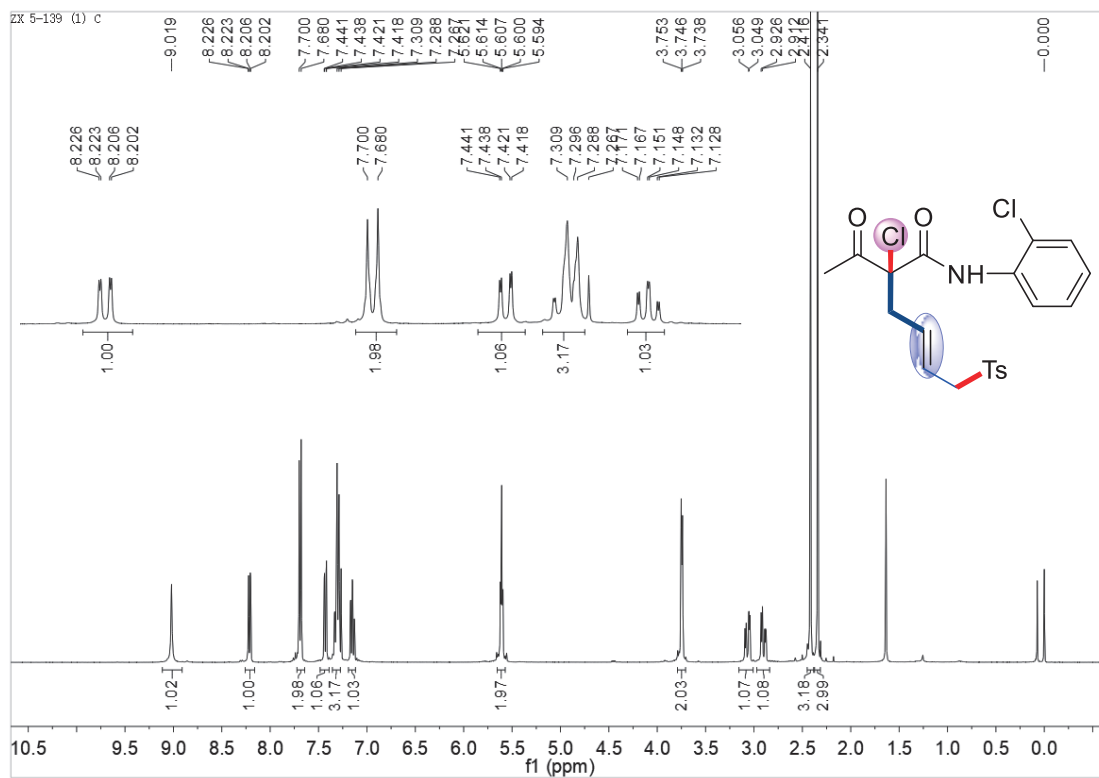

### 3d1, <sup>13</sup>C NMR

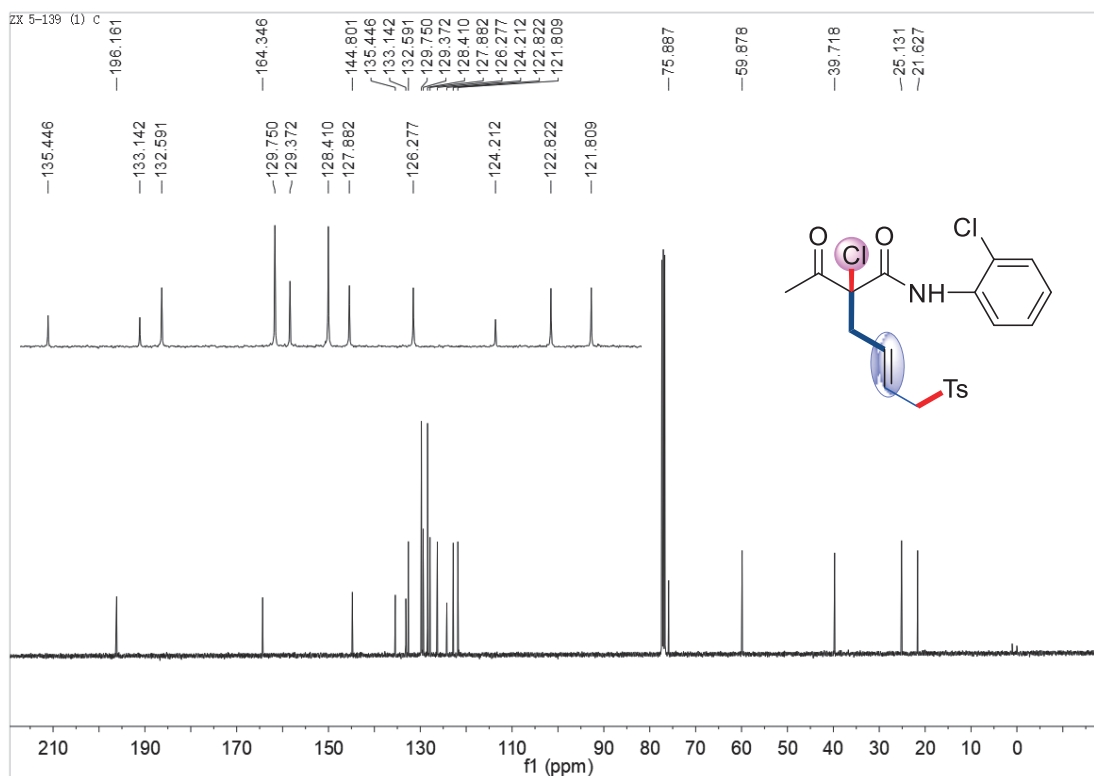

### 3d1 DEPT 90 and DEPT 135

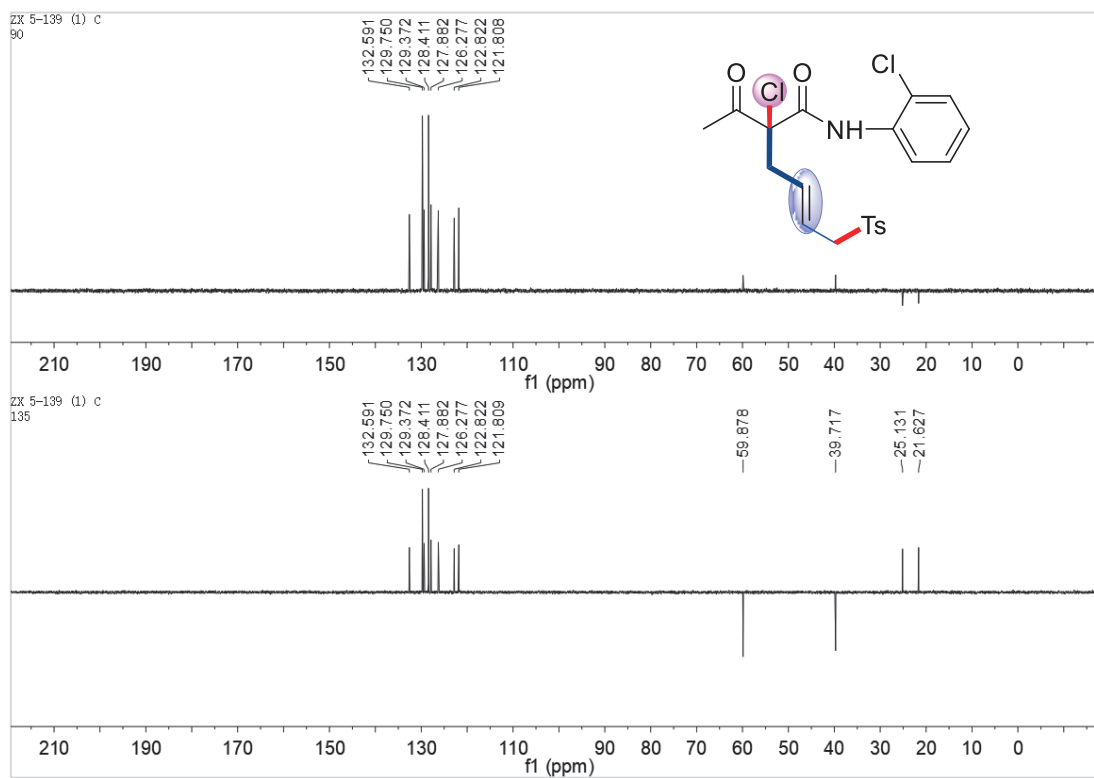

### 3d2, <sup>1</sup>H NMR

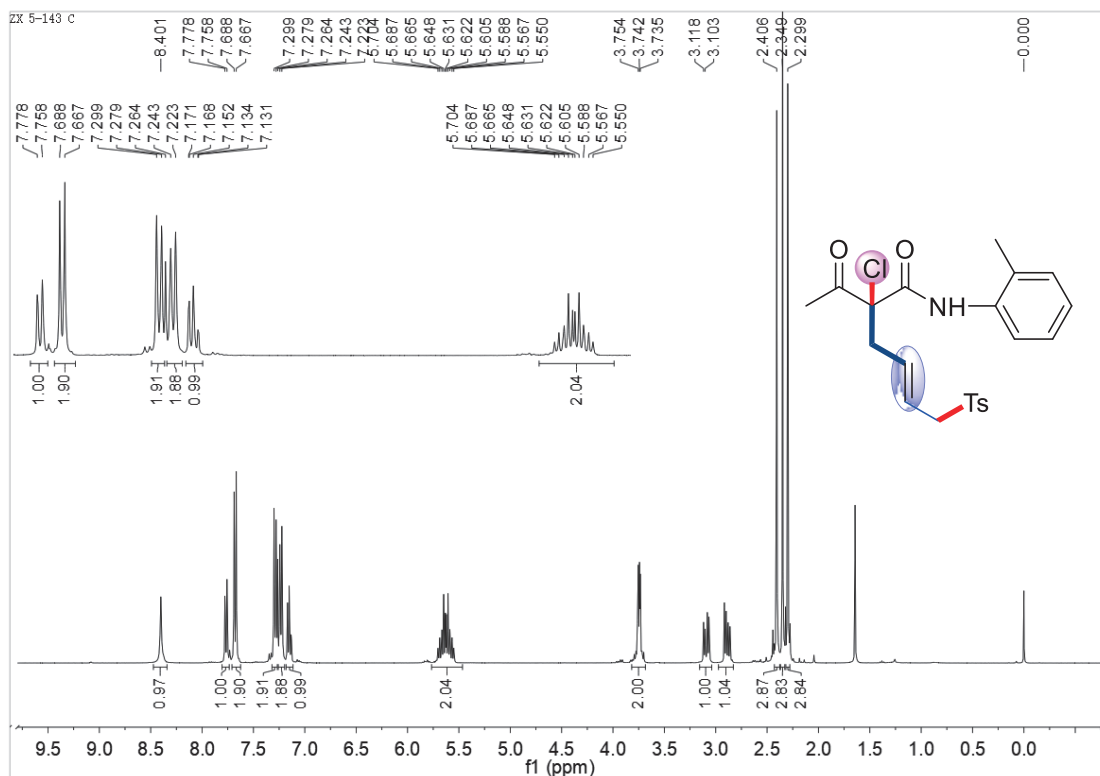

### 3d2, <sup>13</sup>C NMR

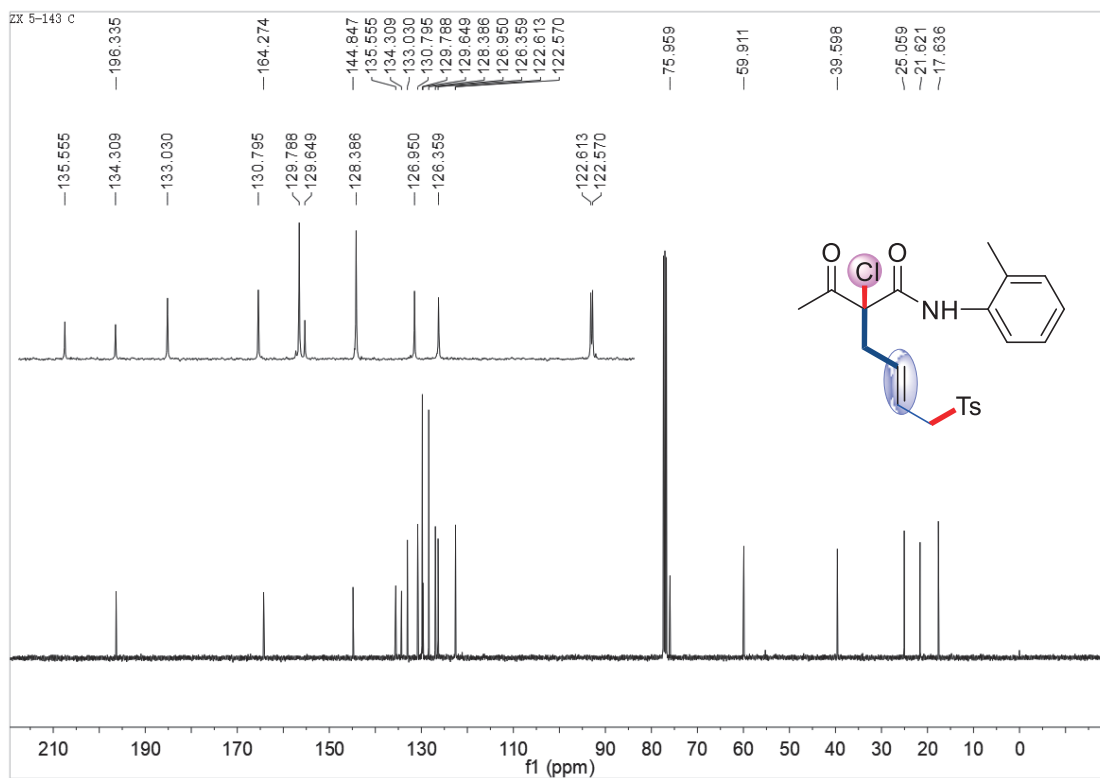

### 3d2 DEPT 90 and DEPT 135

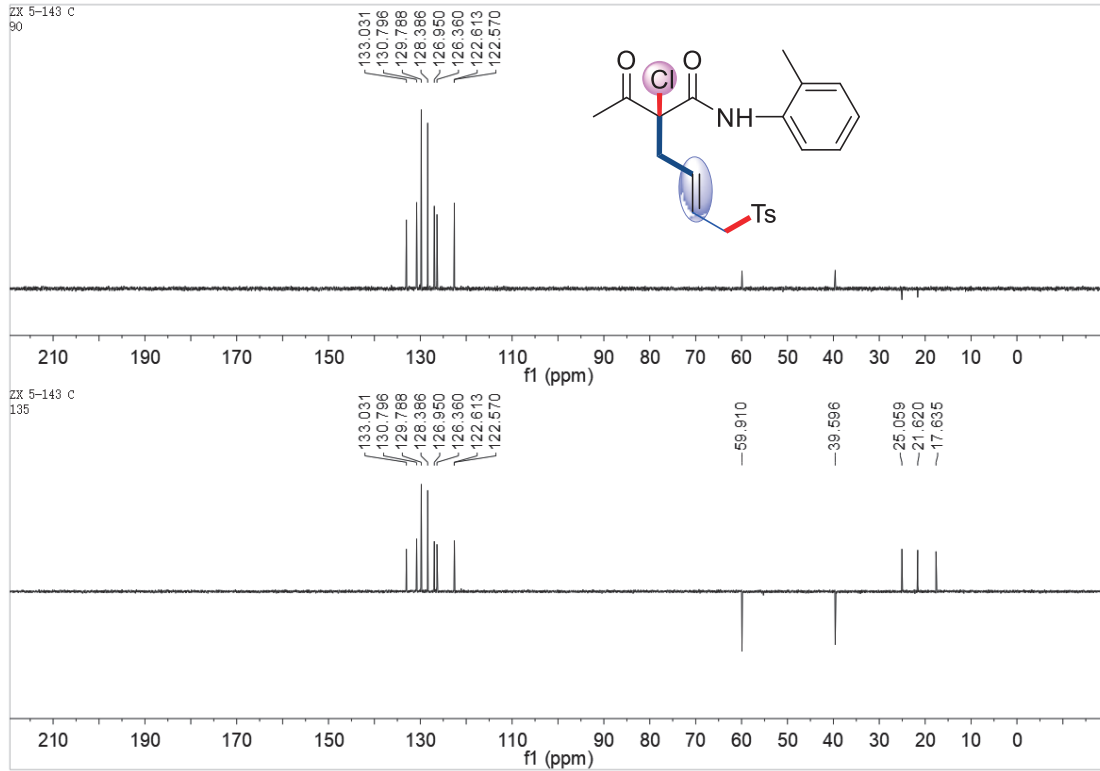

### 3d3, <sup>1</sup>H NMR

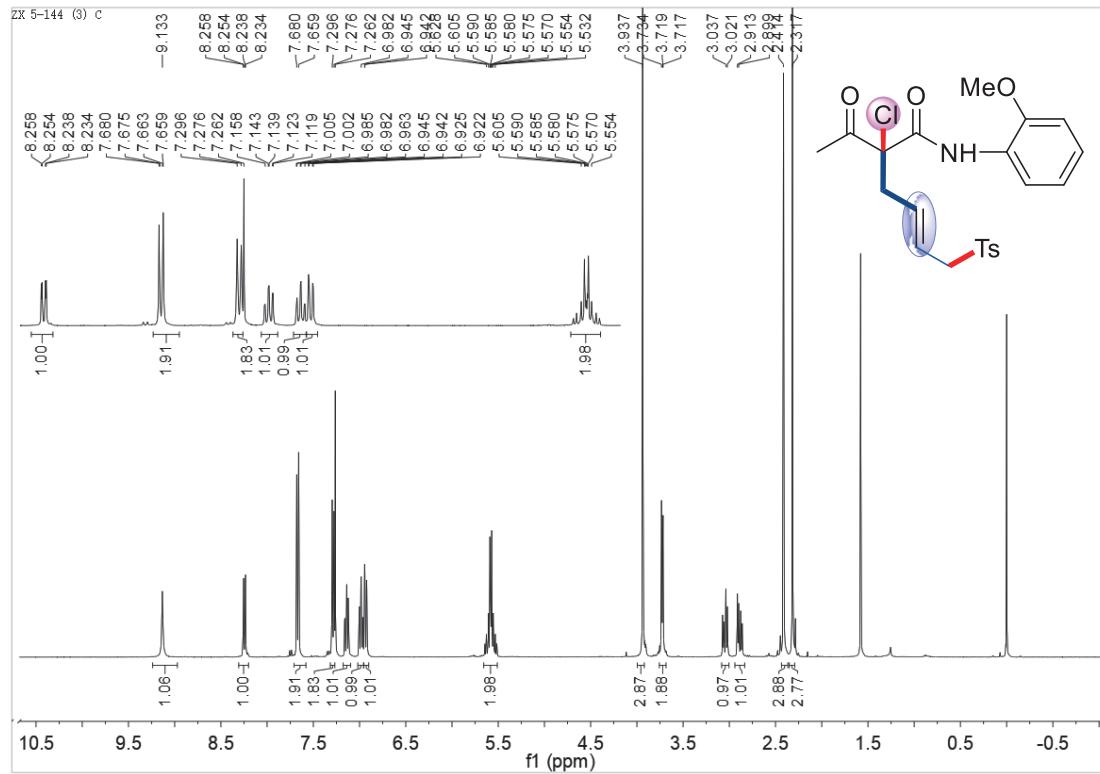



### 3d3, <sup>13</sup>C NMR

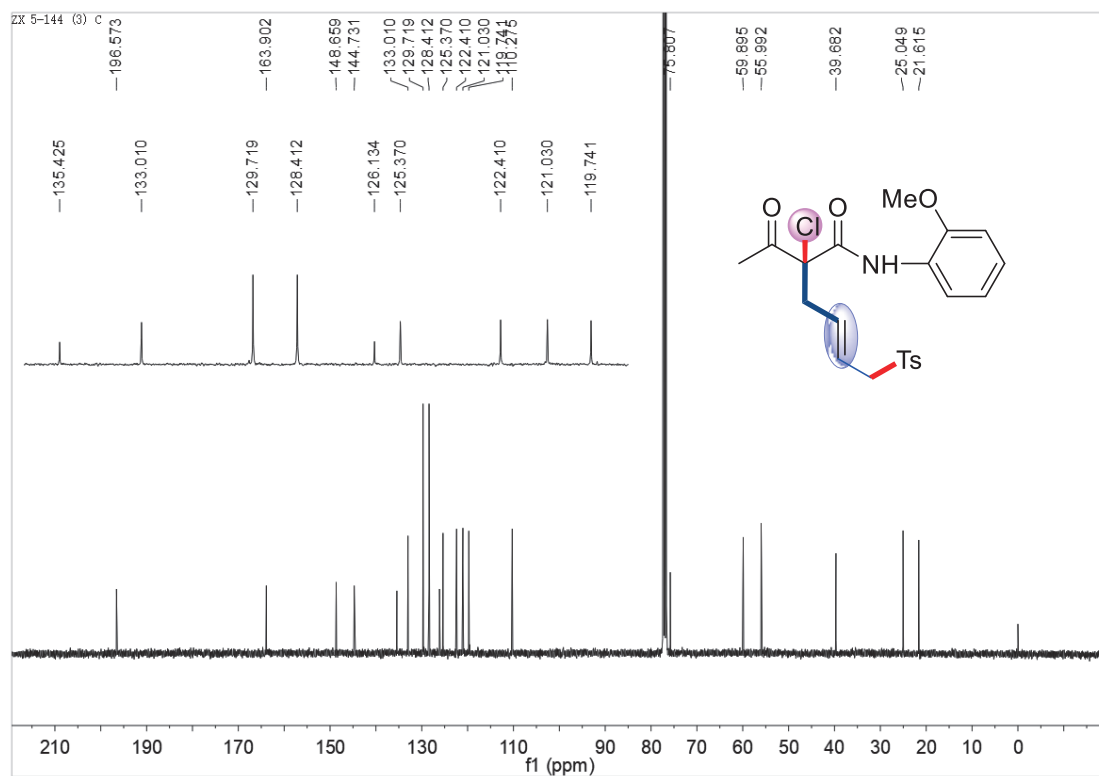

### 3d3 DEPT 90 and DEPT 135

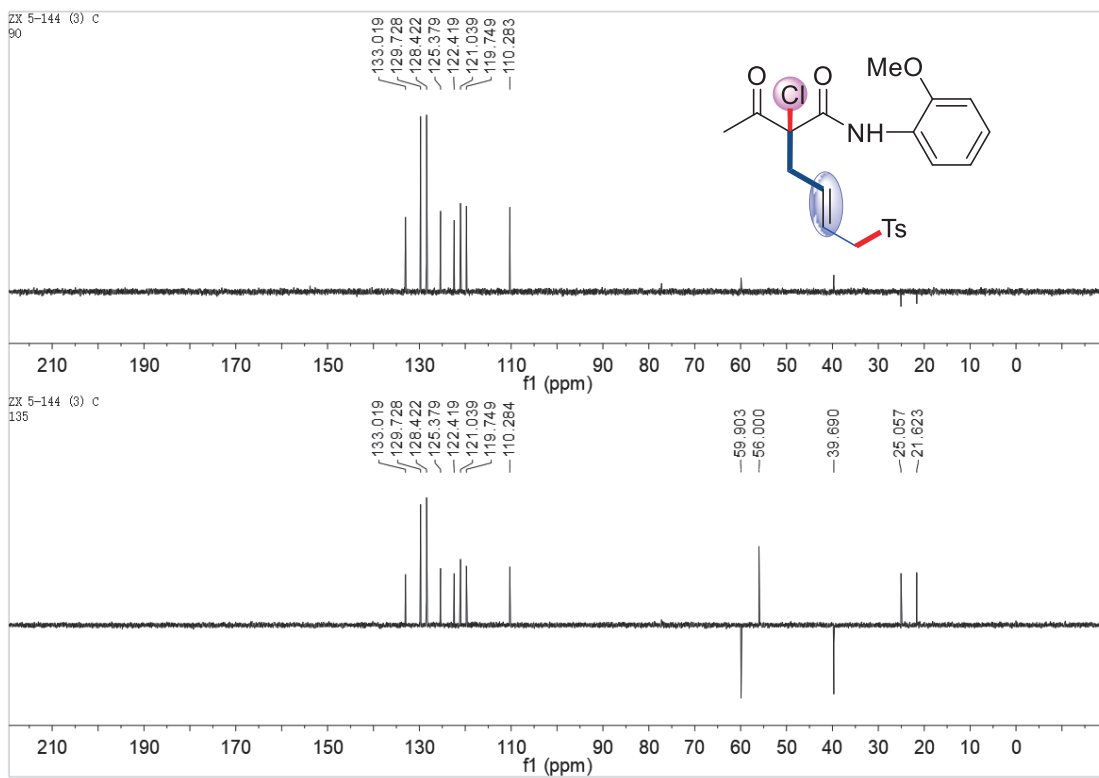

### 3e, <sup>1</sup>H NMR

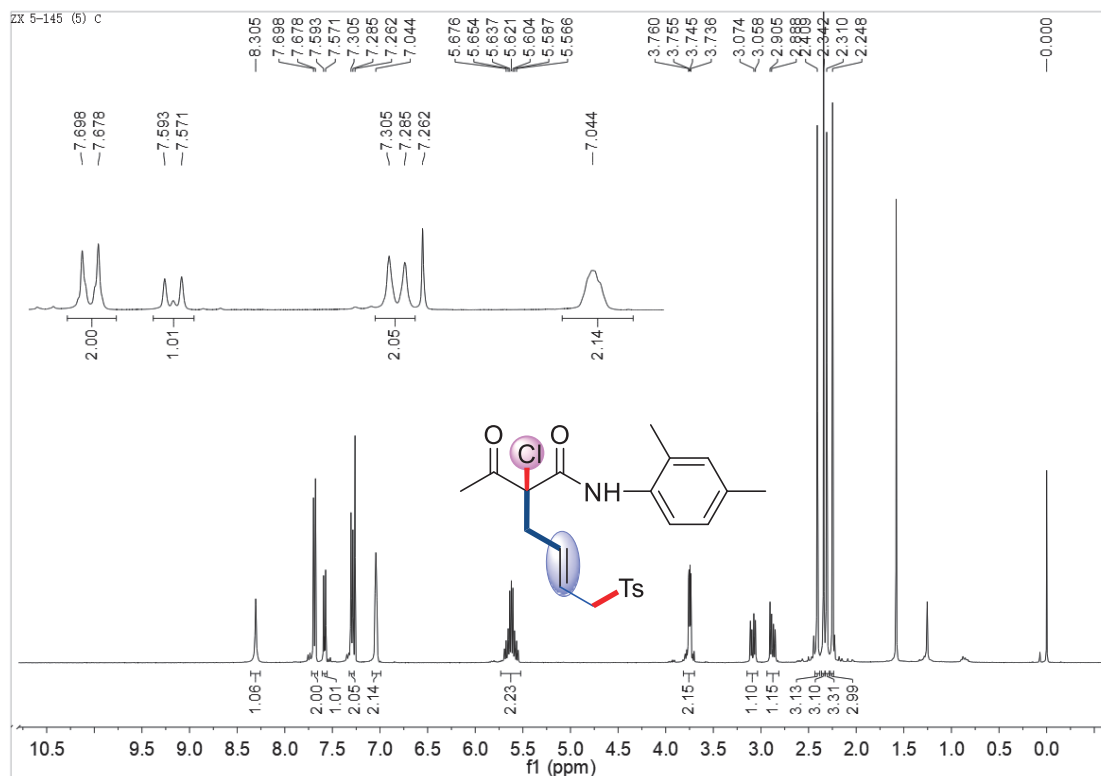

### 3e, <sup>13</sup>C NMR

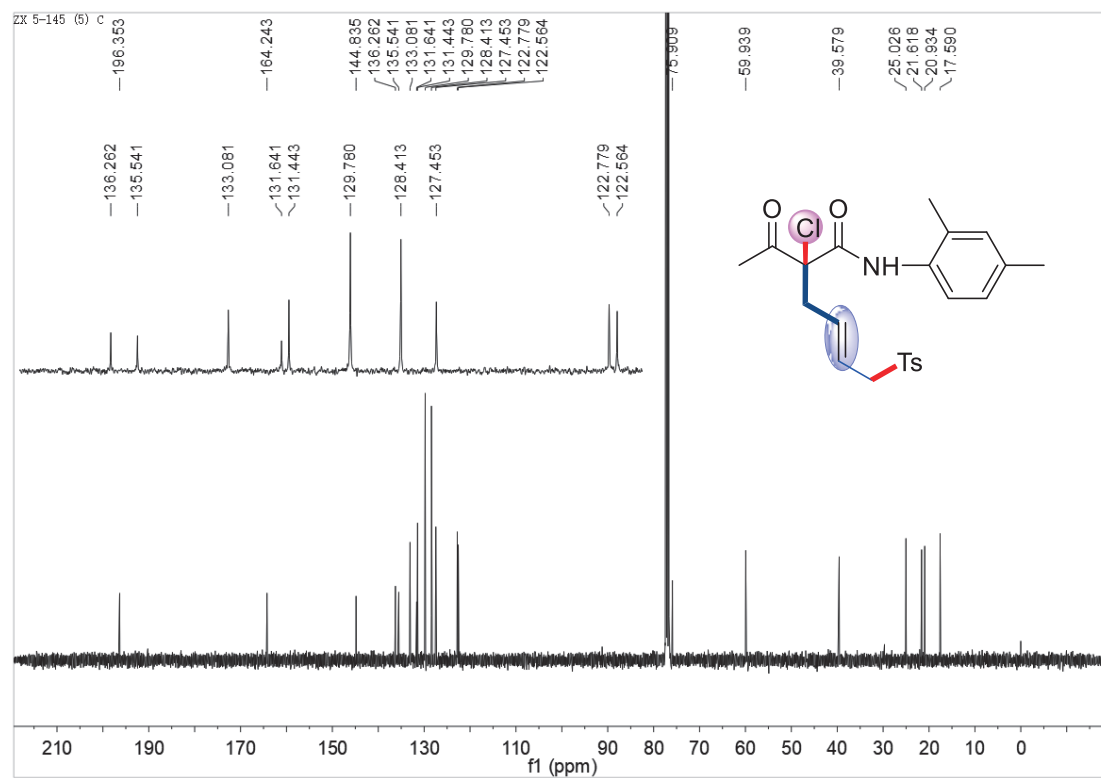

### 3e DEPT 90 and DEPT 135

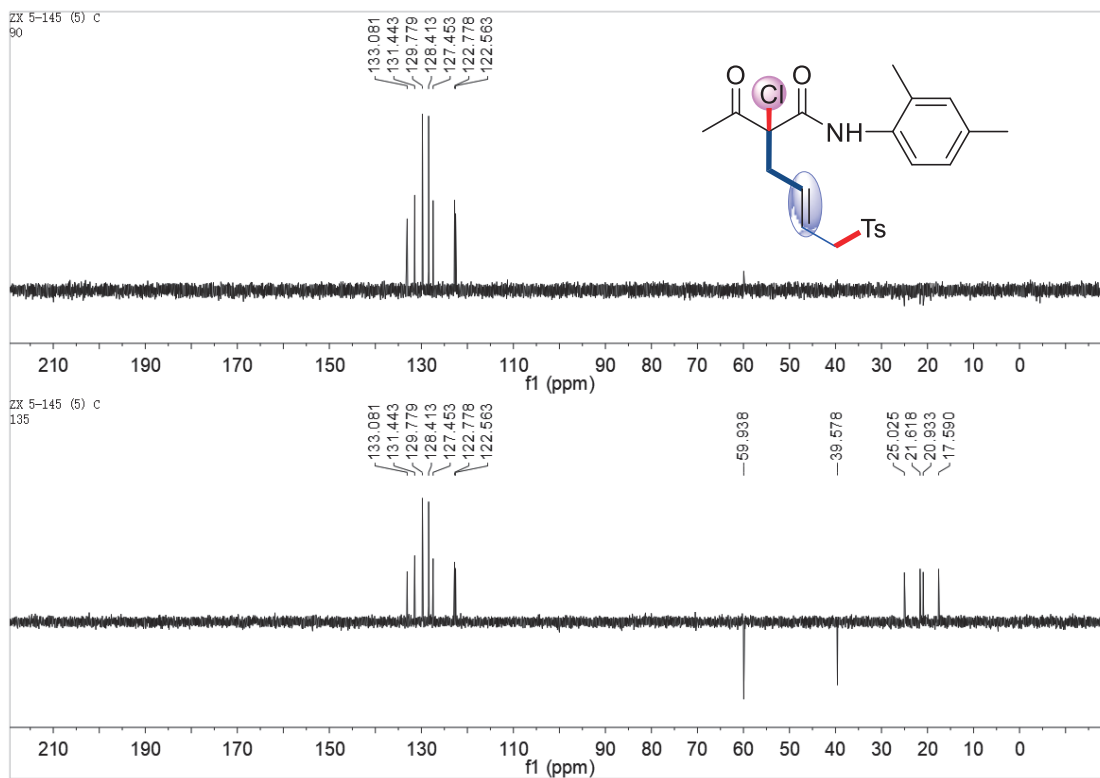

### 3f1, <sup>1</sup>H NMR

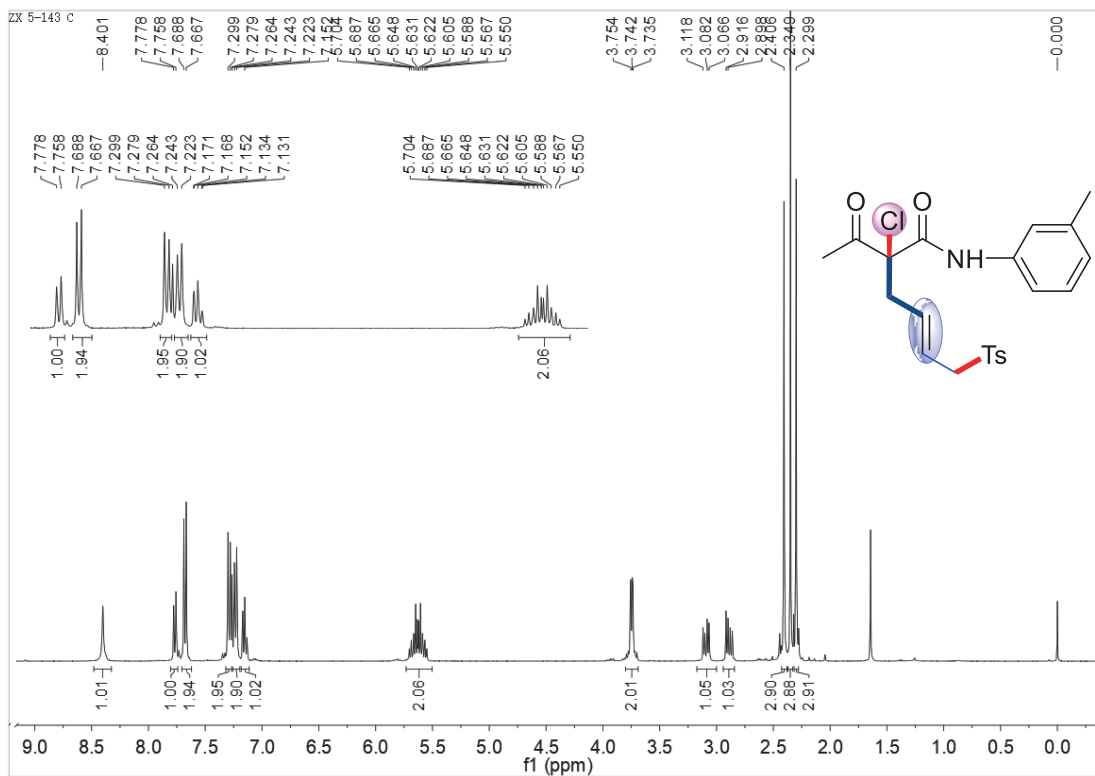

### 3f1, <sup>13</sup>C NMR

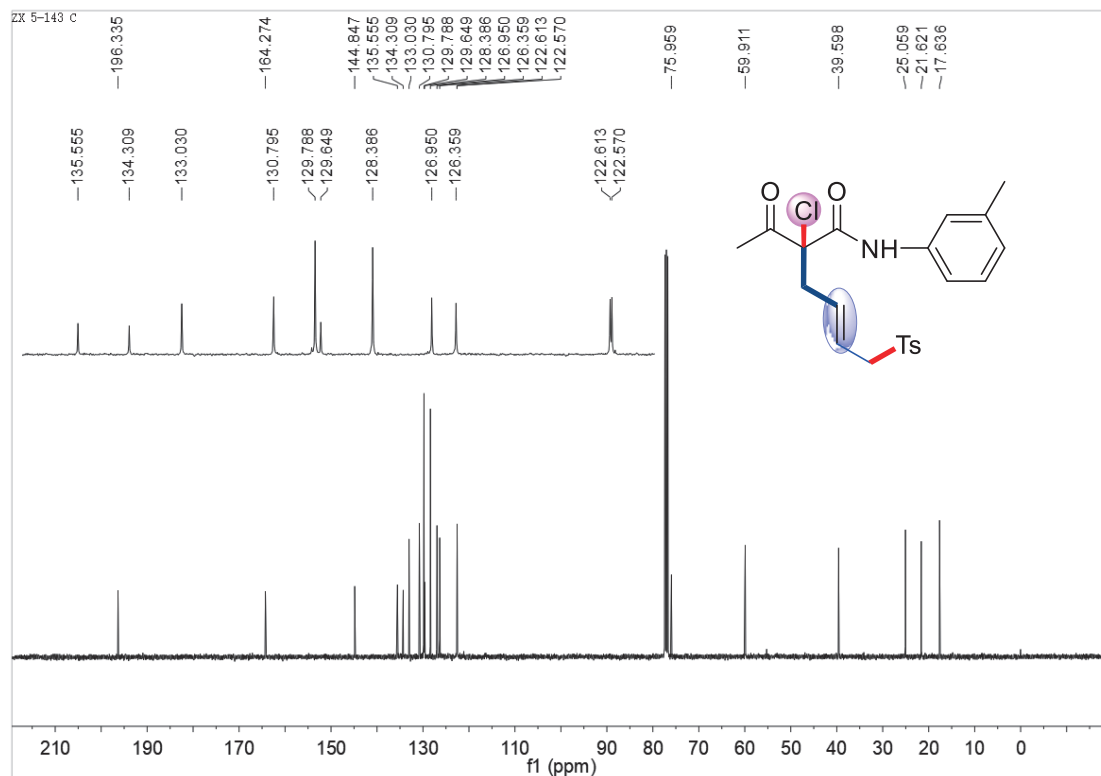

### 3f1, DEPT 90 and DEPT 135

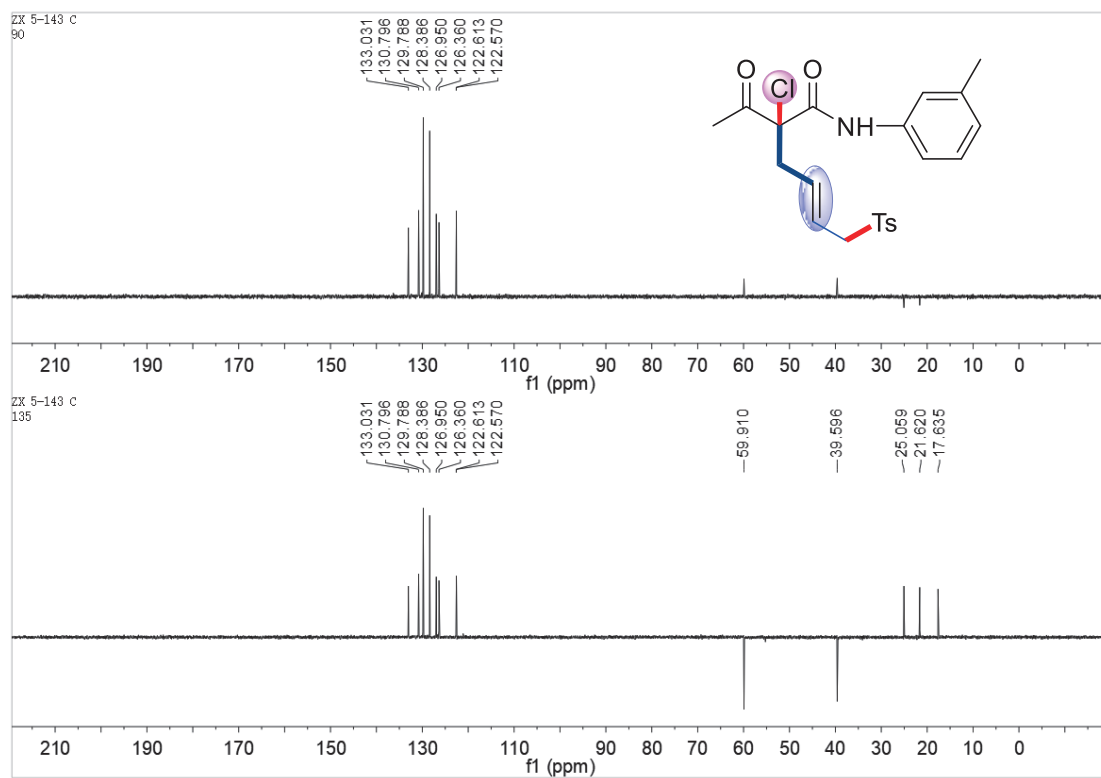

### 3f2, <sup>1</sup>H NMR

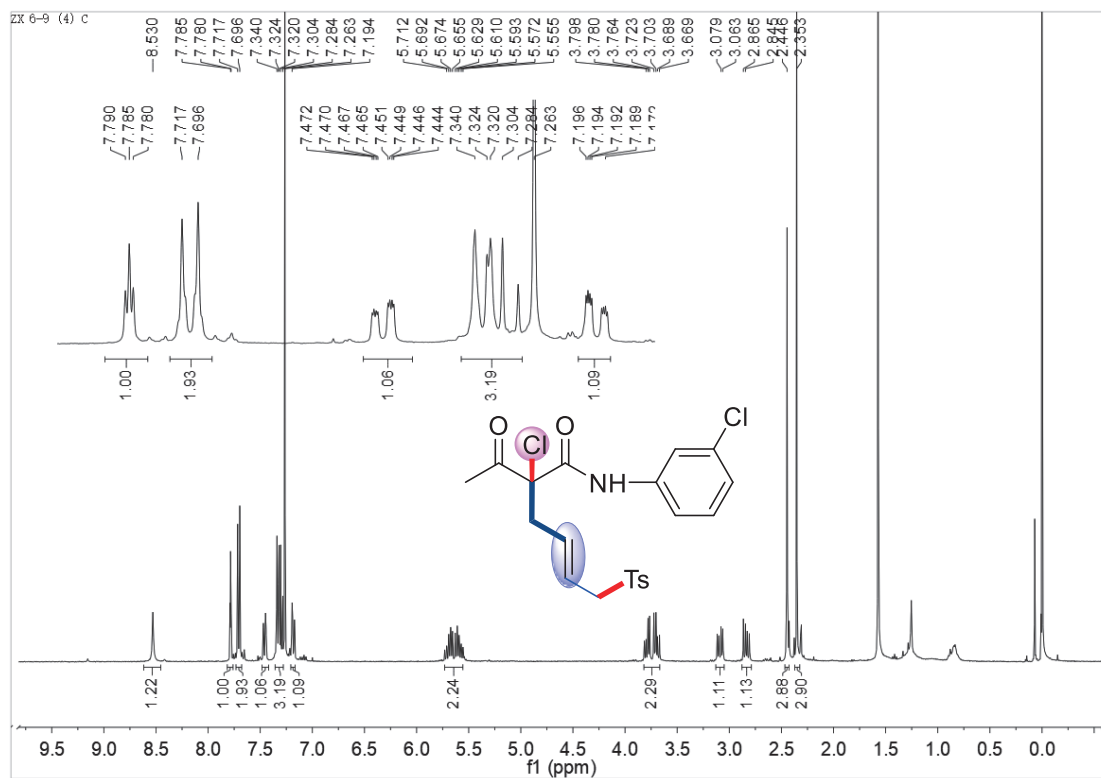

### 3f2, <sup>13</sup>C NMR

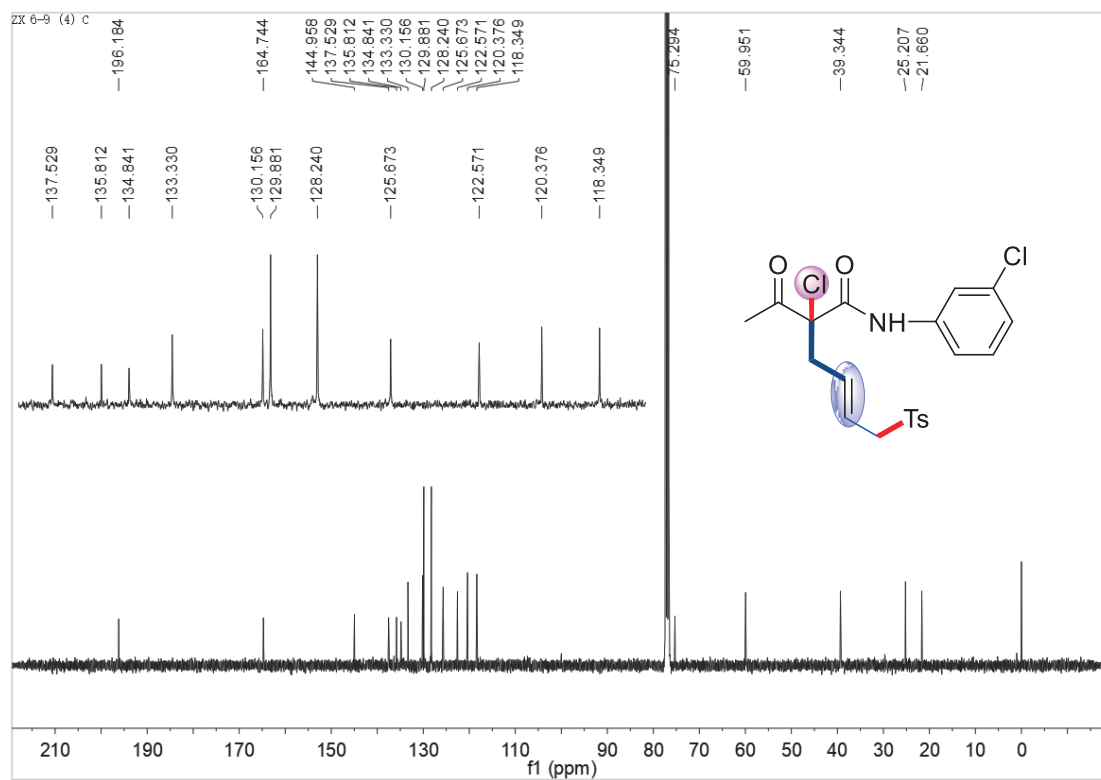

### 3f2, DEPT 90 and DEPT 135

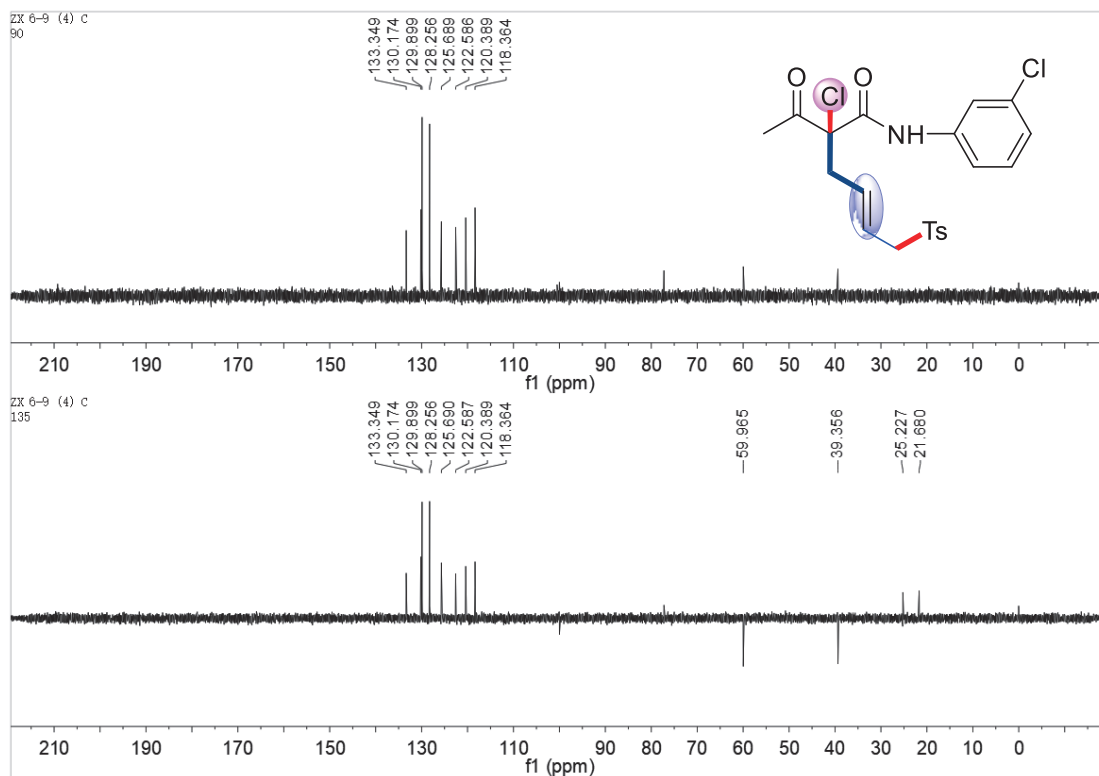

### 3g, <sup>1</sup>H NMR

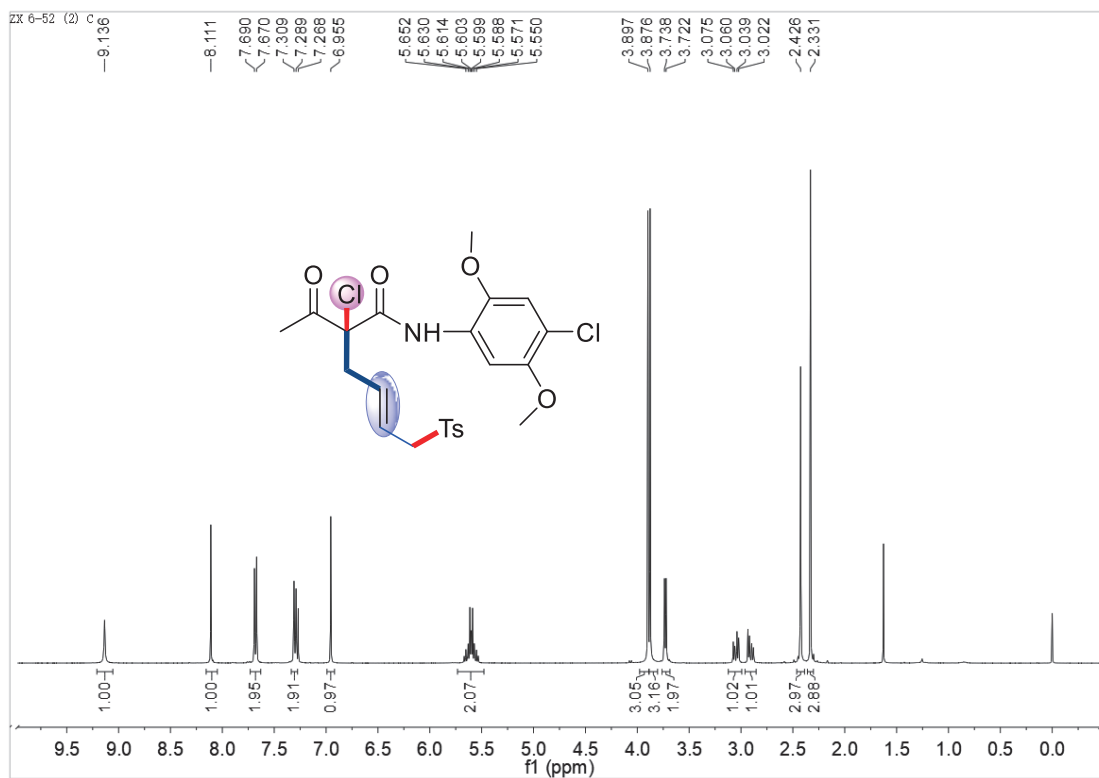

### 3g, <sup>13</sup>C NMR

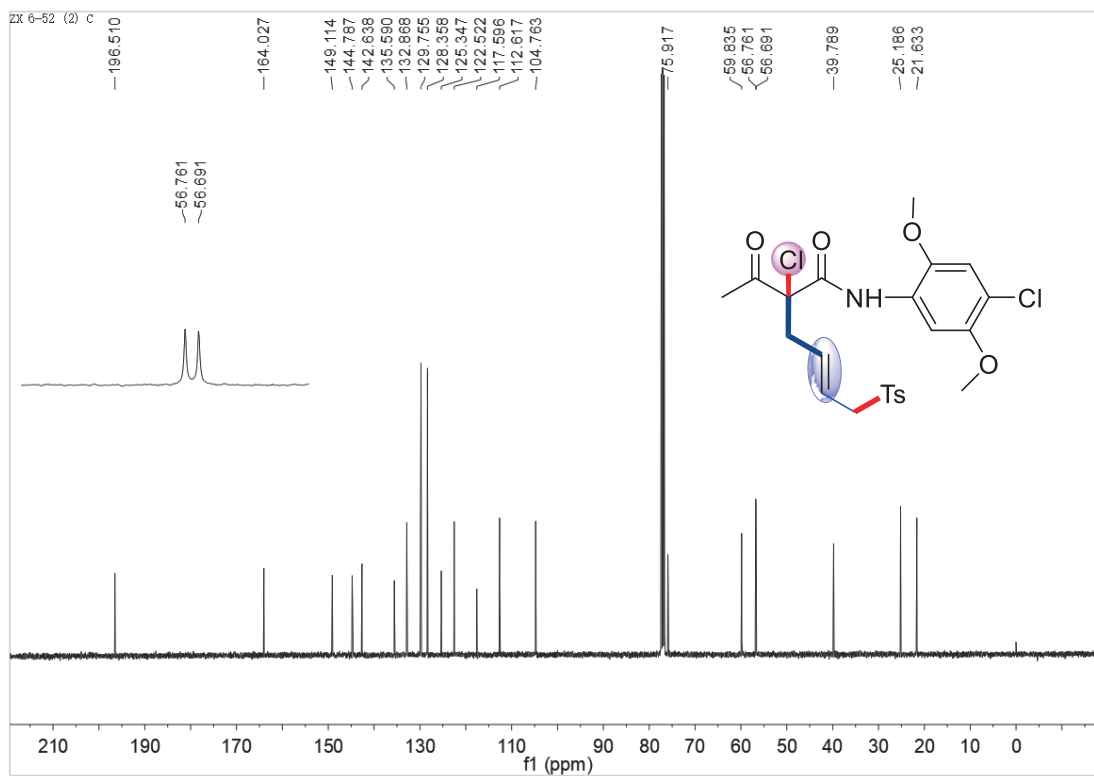

### 3g, DEPT 90 and DEPT 135

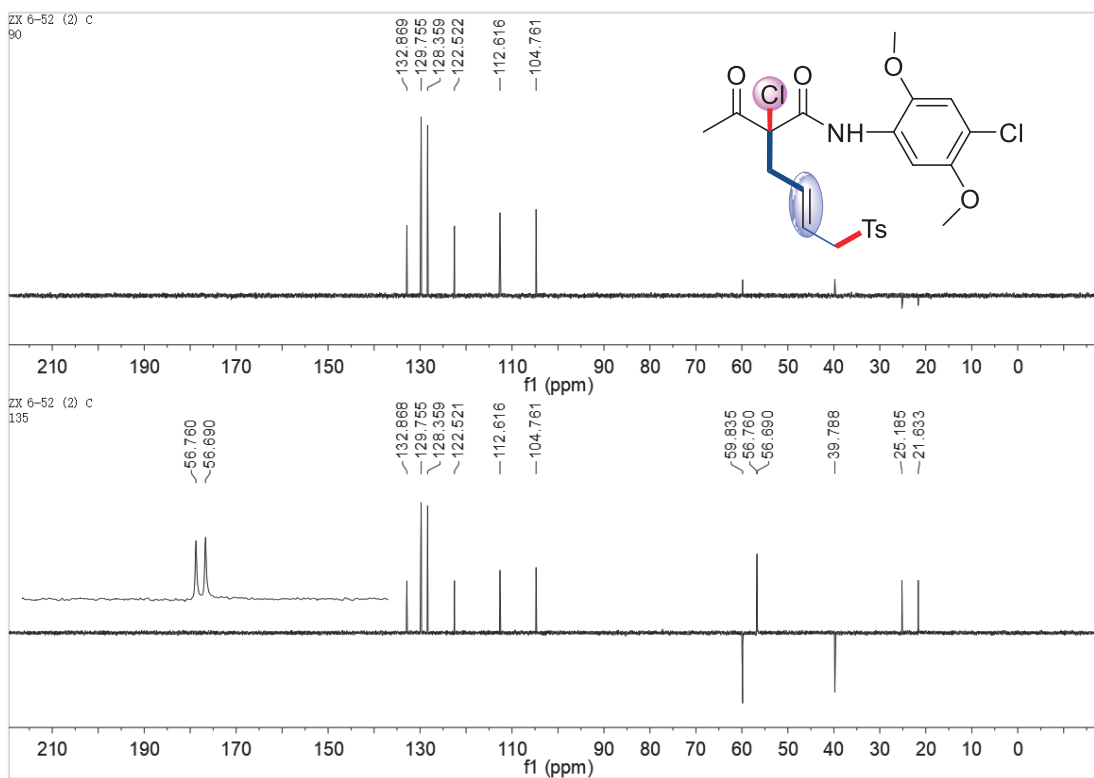

### 3h, <sup>1</sup>H NMR

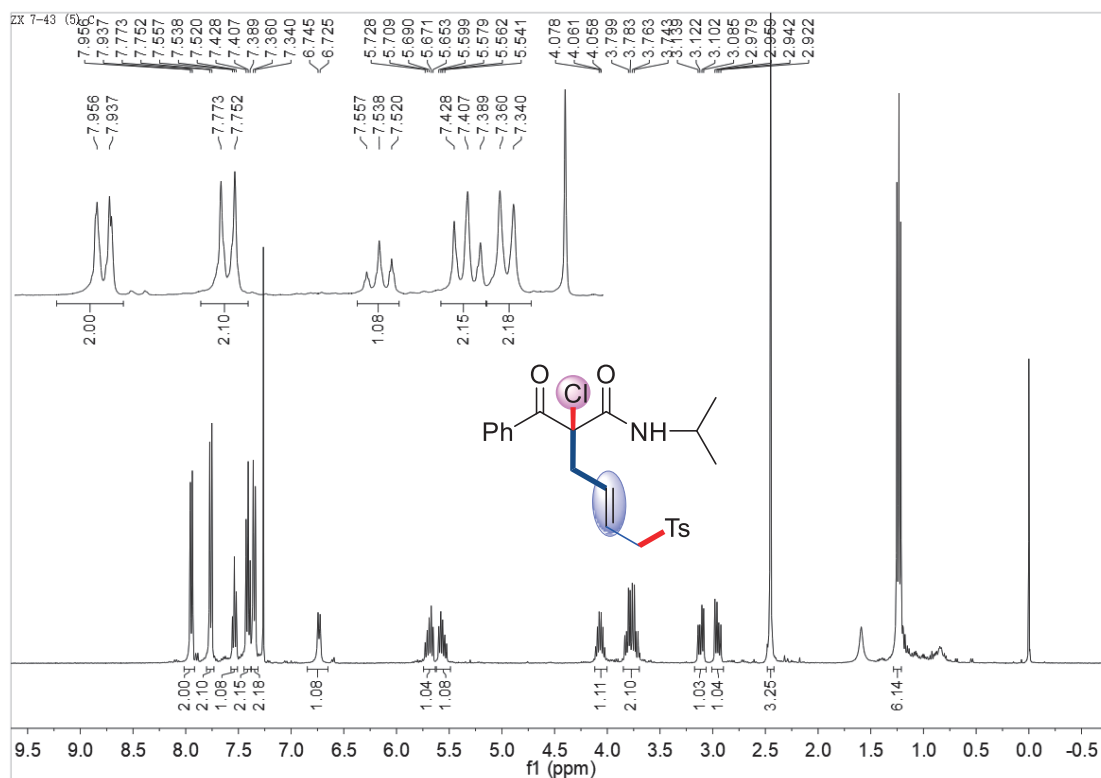

### 3h, <sup>13</sup>C NMR

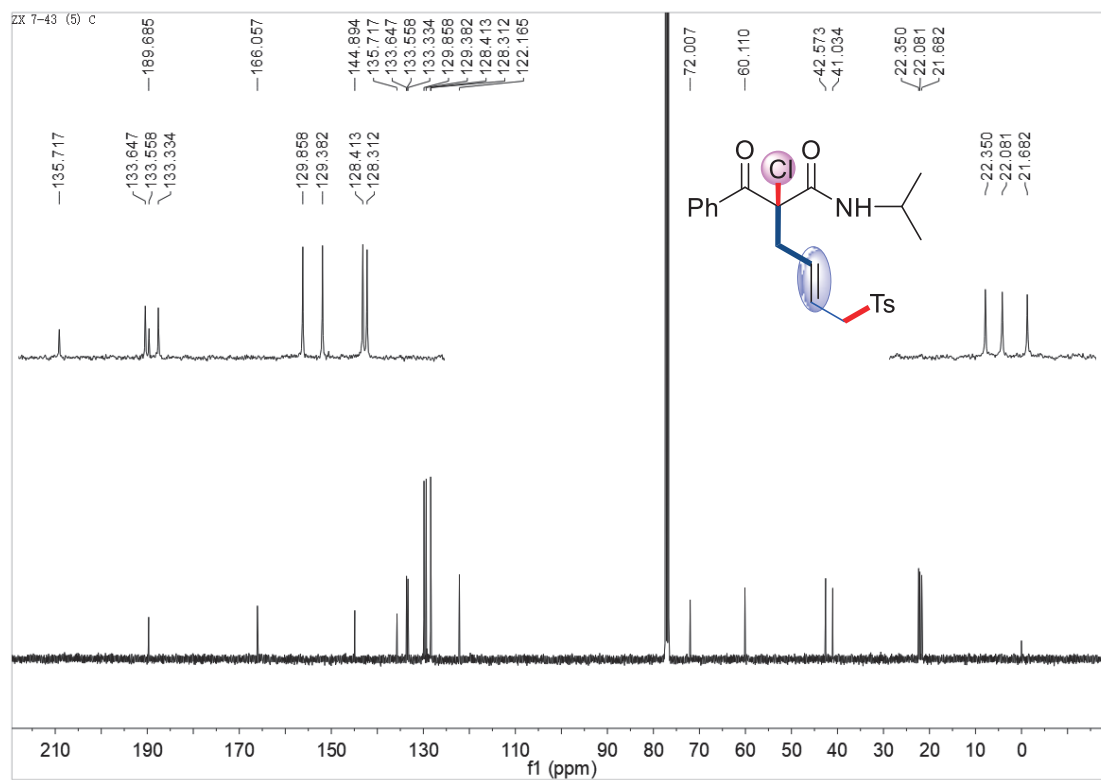



### 3h, DEPT 90 and DEPT 135

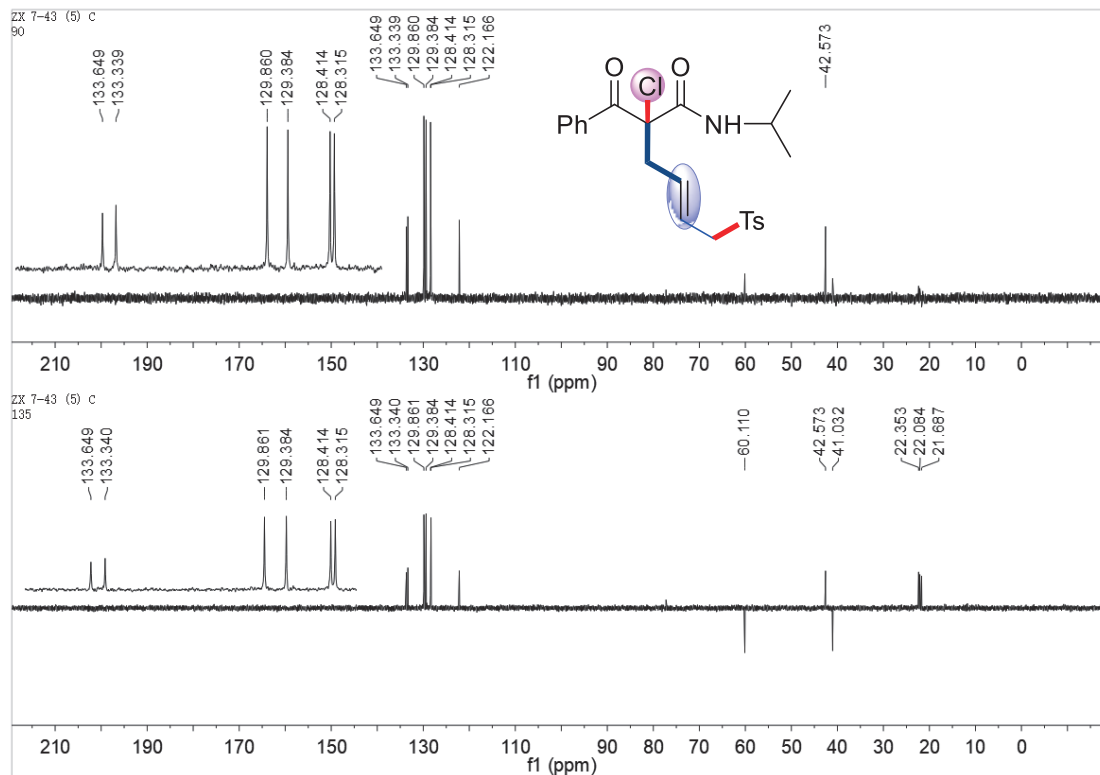

### 3i1, <sup>1</sup>H NMR

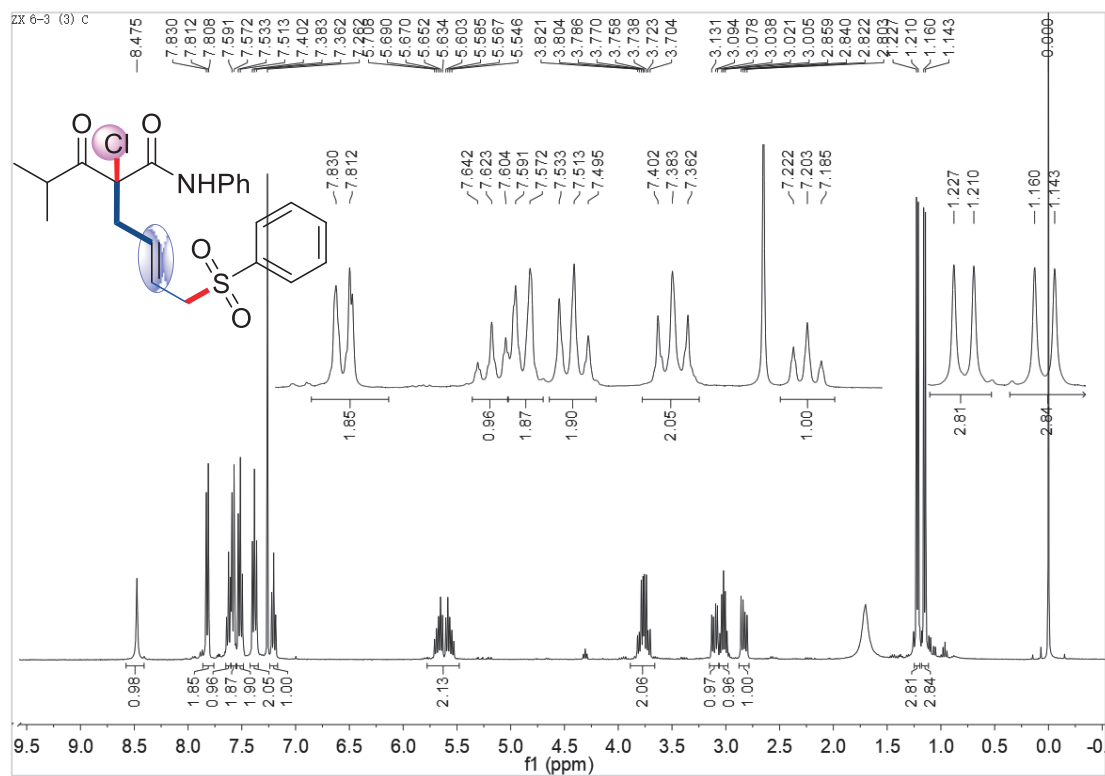

### 3i1, <sup>13</sup>C NMR

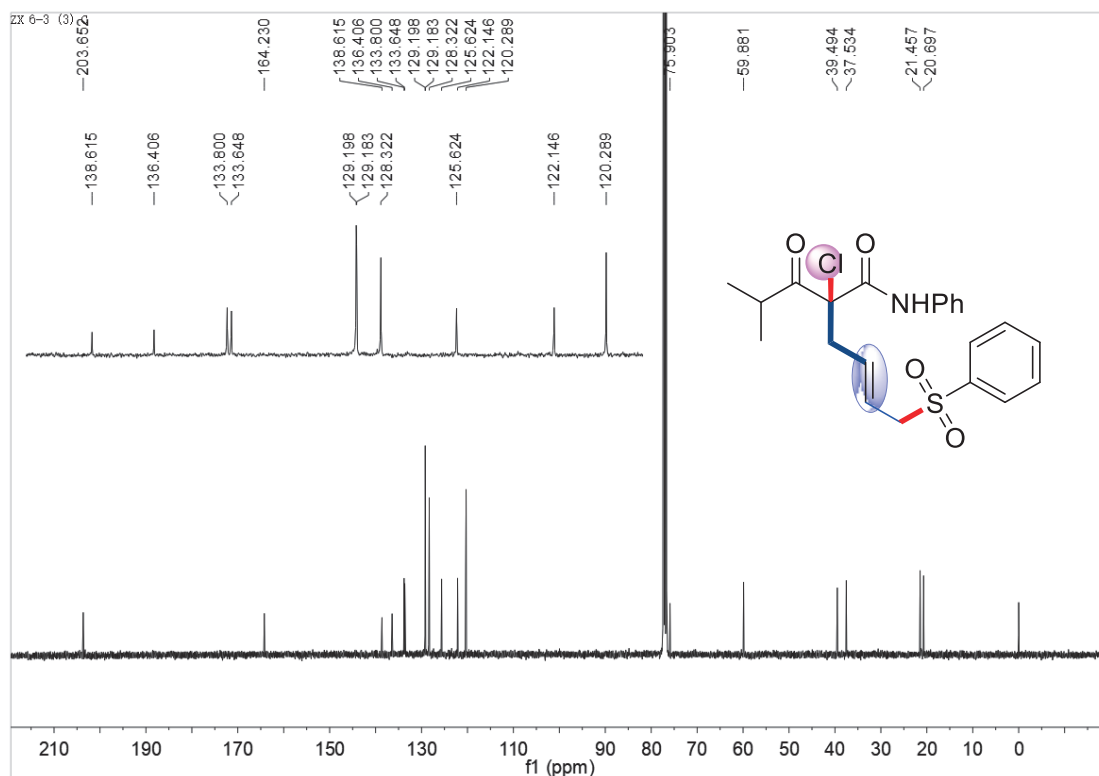

### 3i1, DEPT 90 and DEPT 135

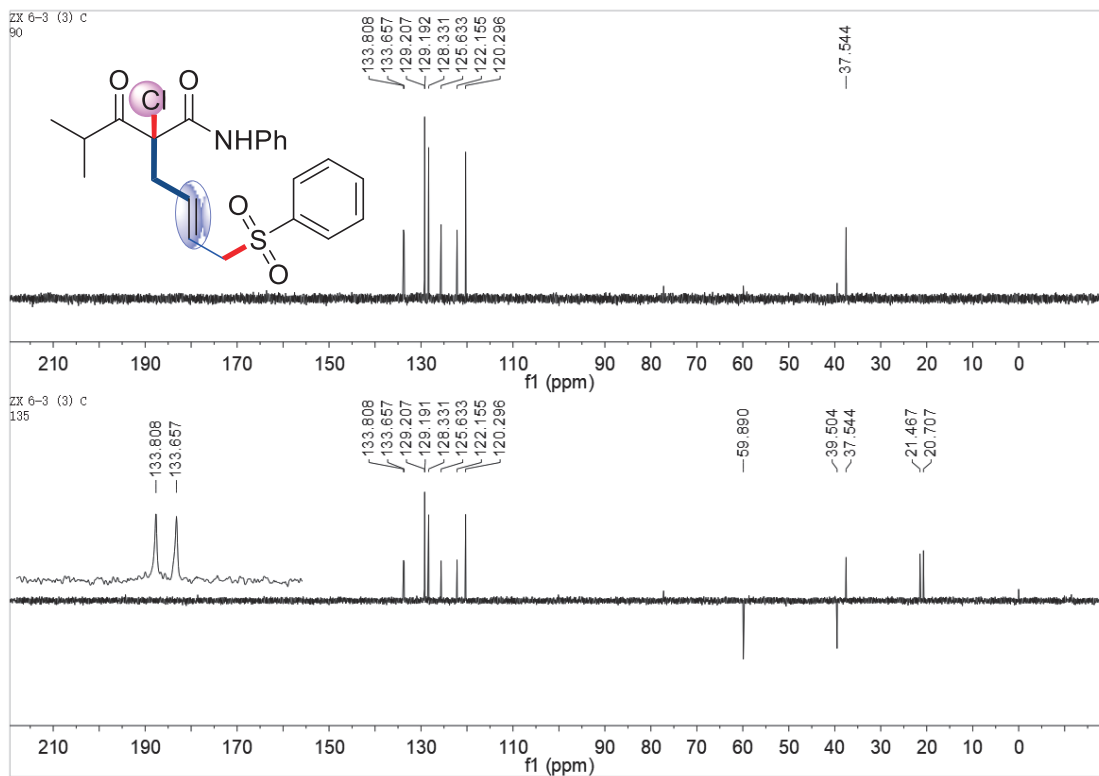

### 3i2, <sup>1</sup>H NMR

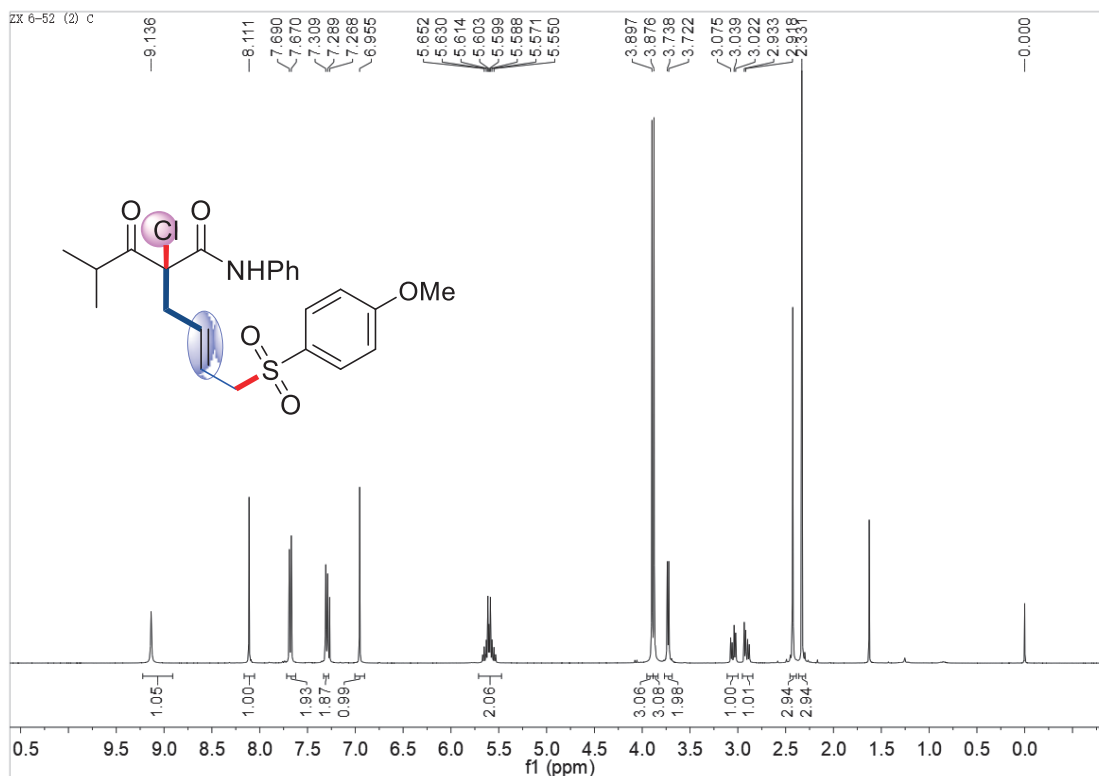

### 3i2, <sup>13</sup>C NMR

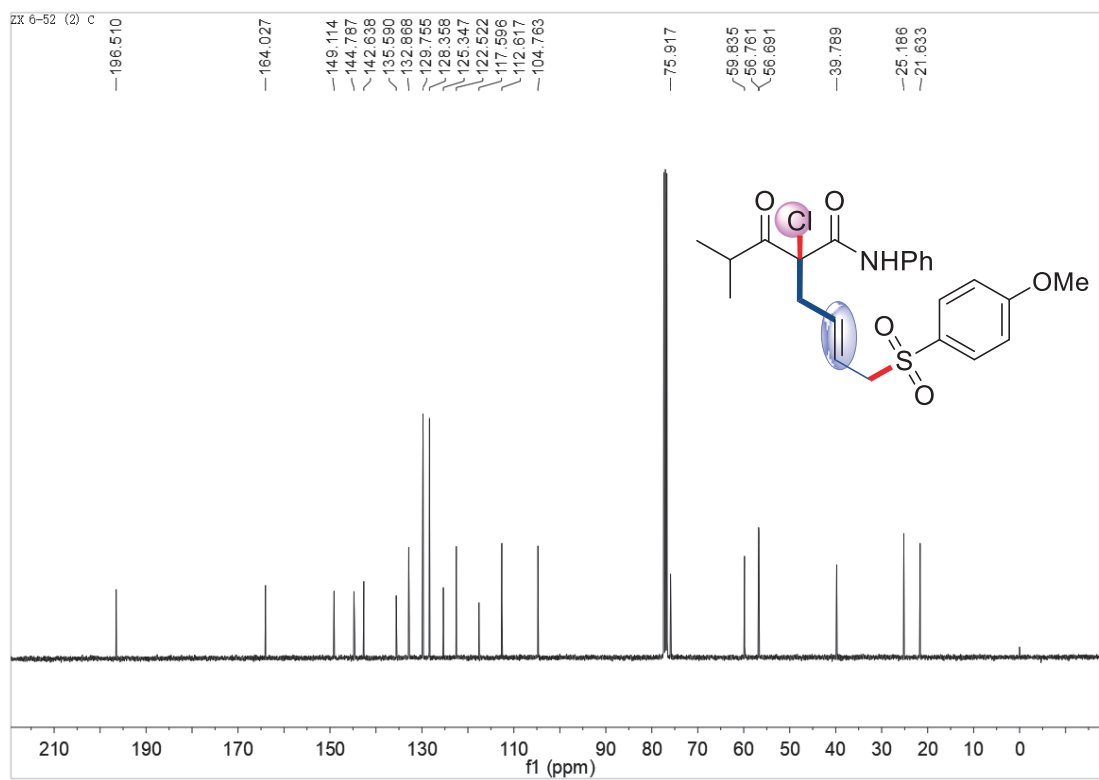

### 3i2 DEPT 90 and DEPT 135

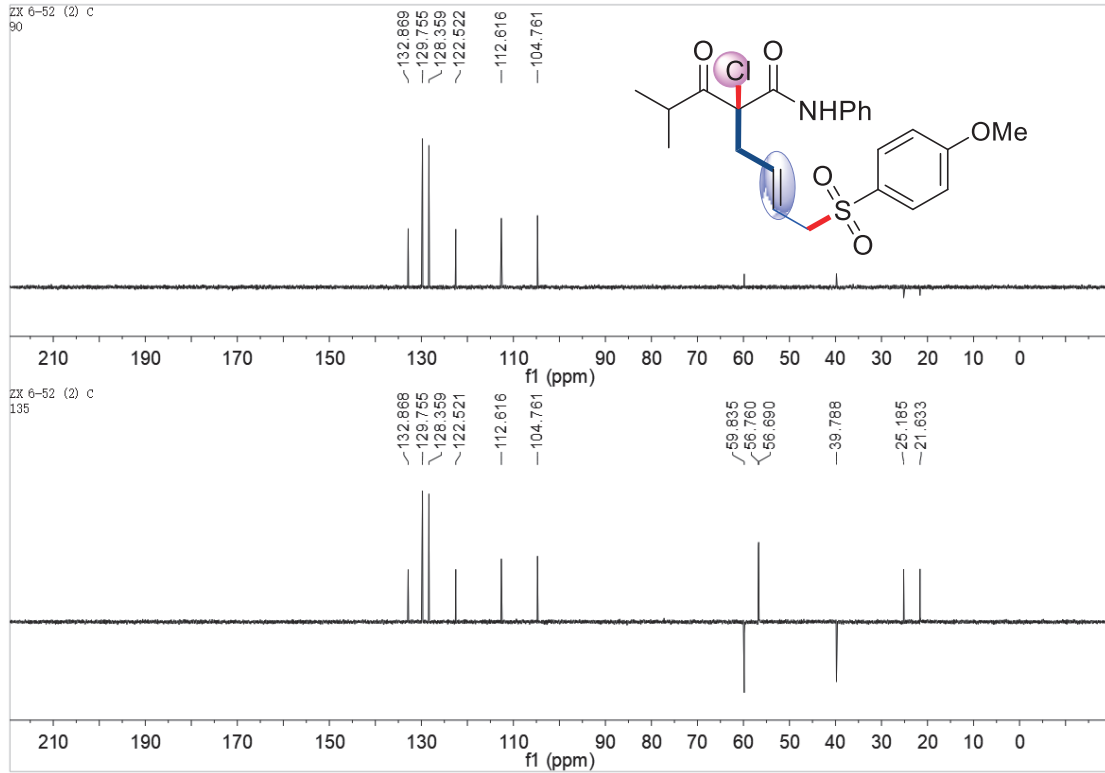

### 3j1, <sup>1</sup>H NMR

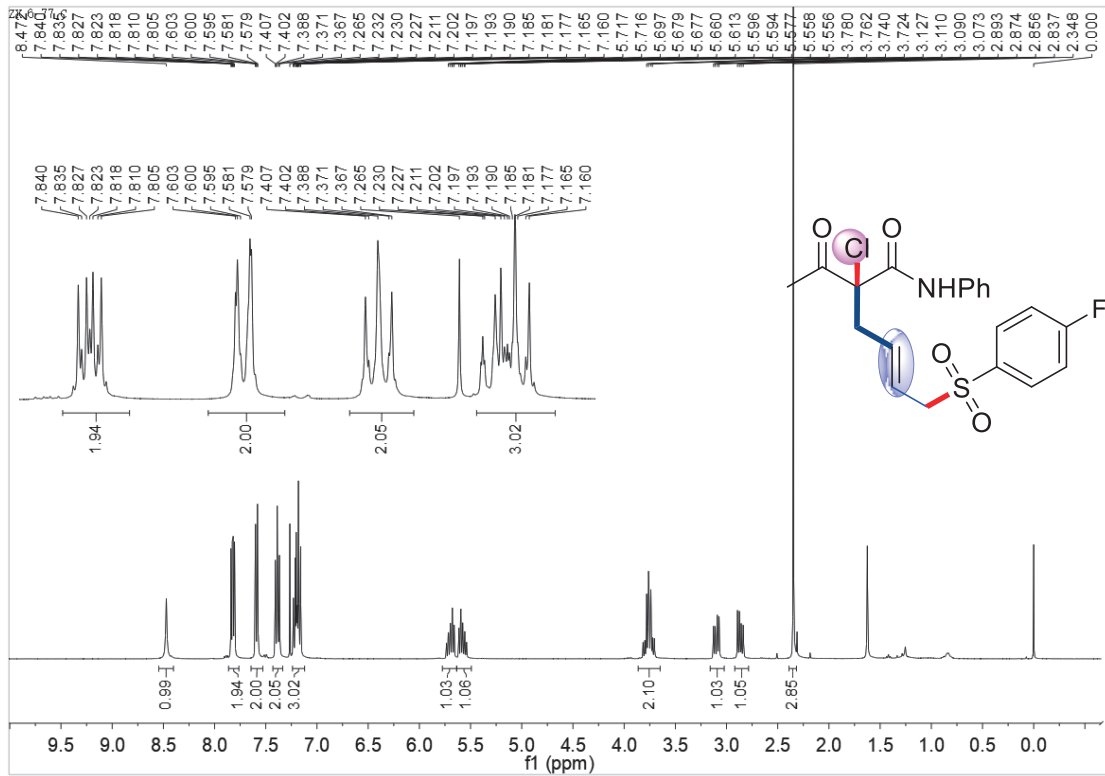

### 3j1, <sup>13</sup>C NMR

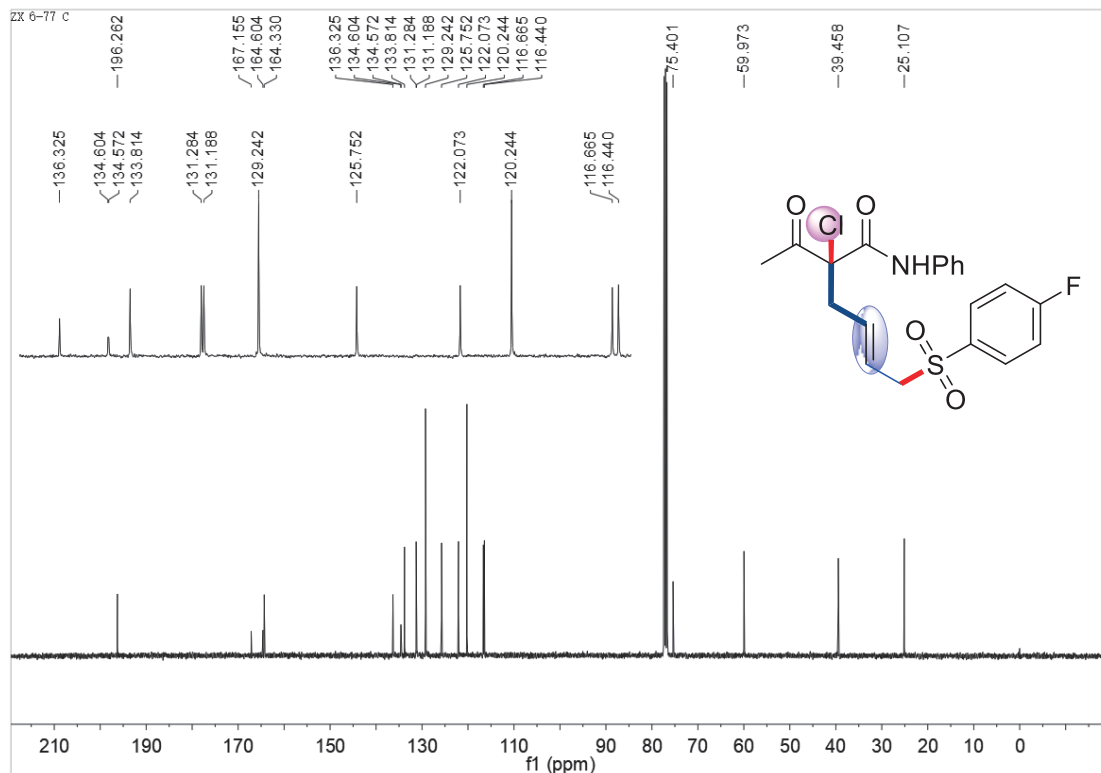

### 3j1, DEPT 90 and DEPT 135

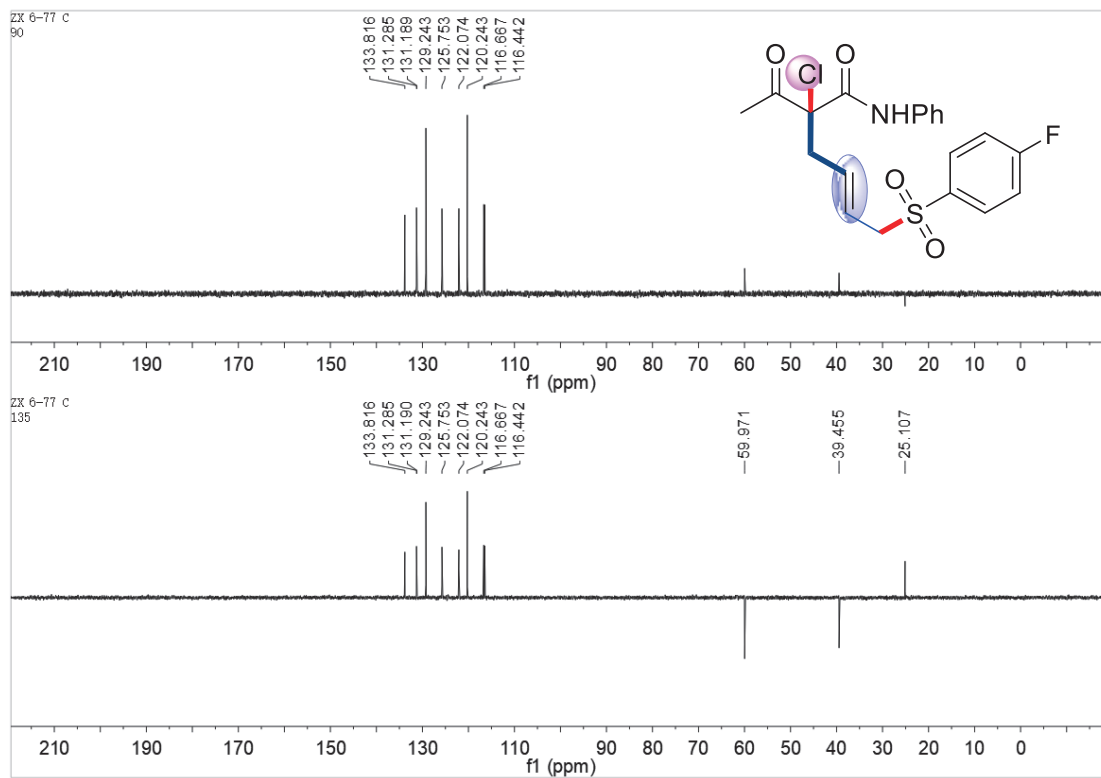

### 3j1, <sup>19</sup>F NMR

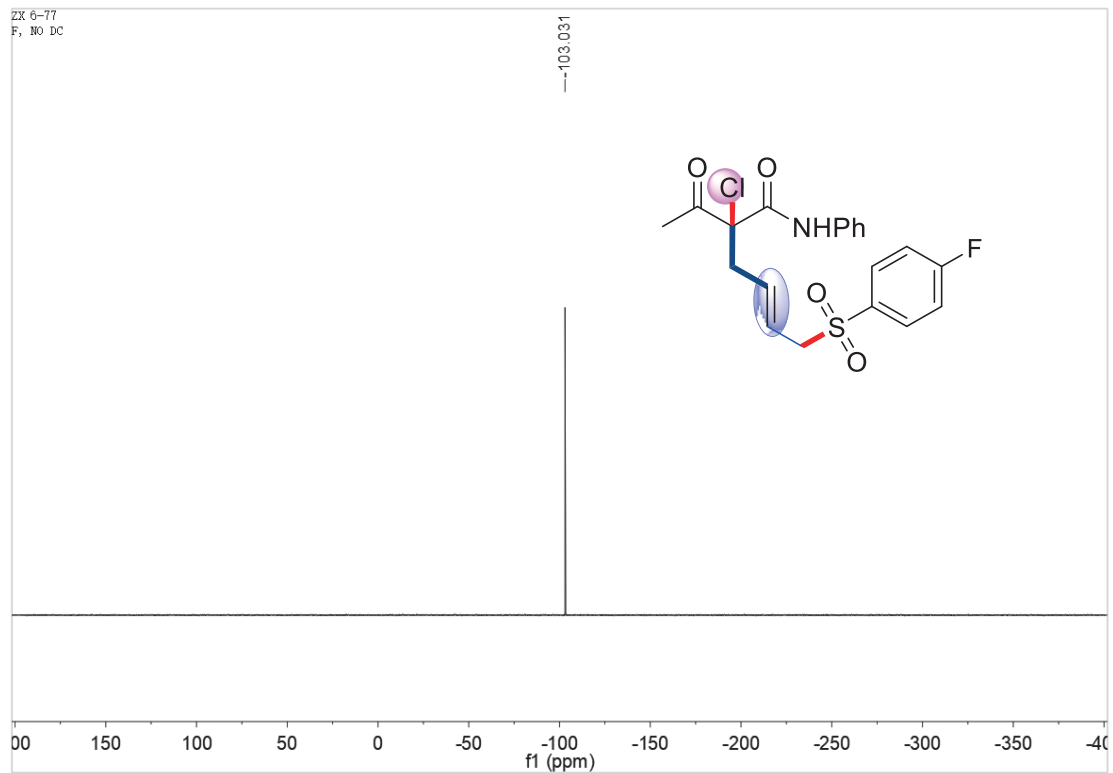

### 3j2, <sup>1</sup>H NMR

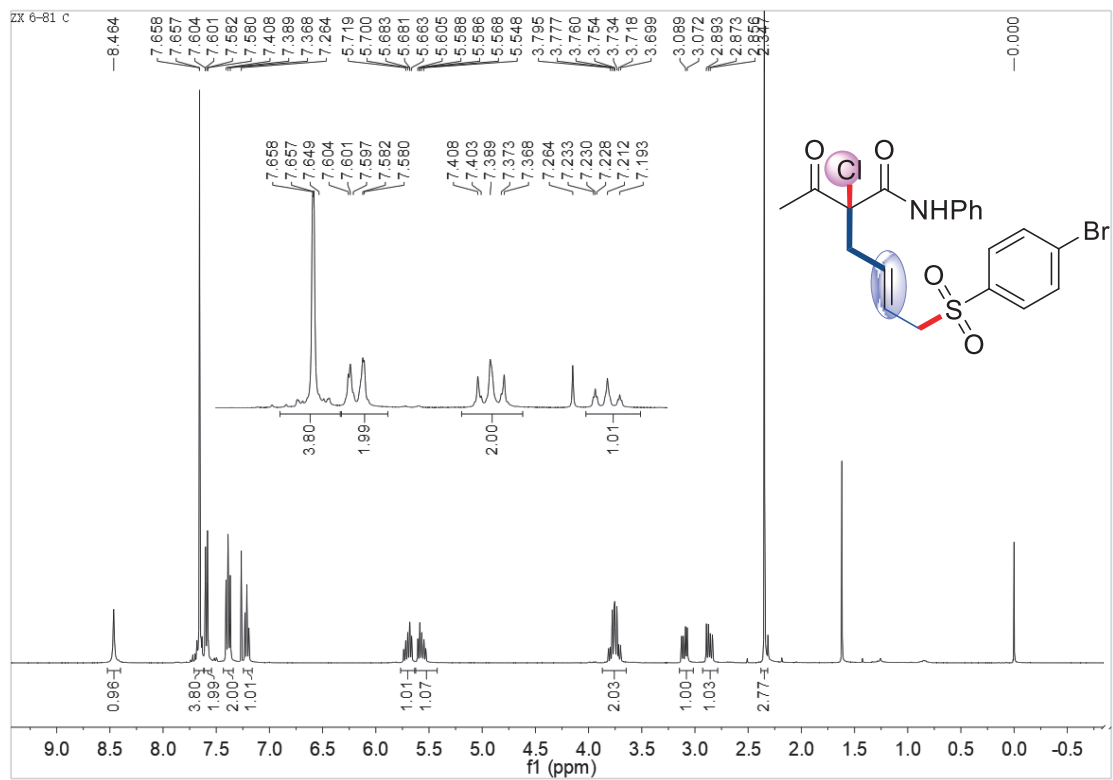

### 3j2, <sup>13</sup>C NMR

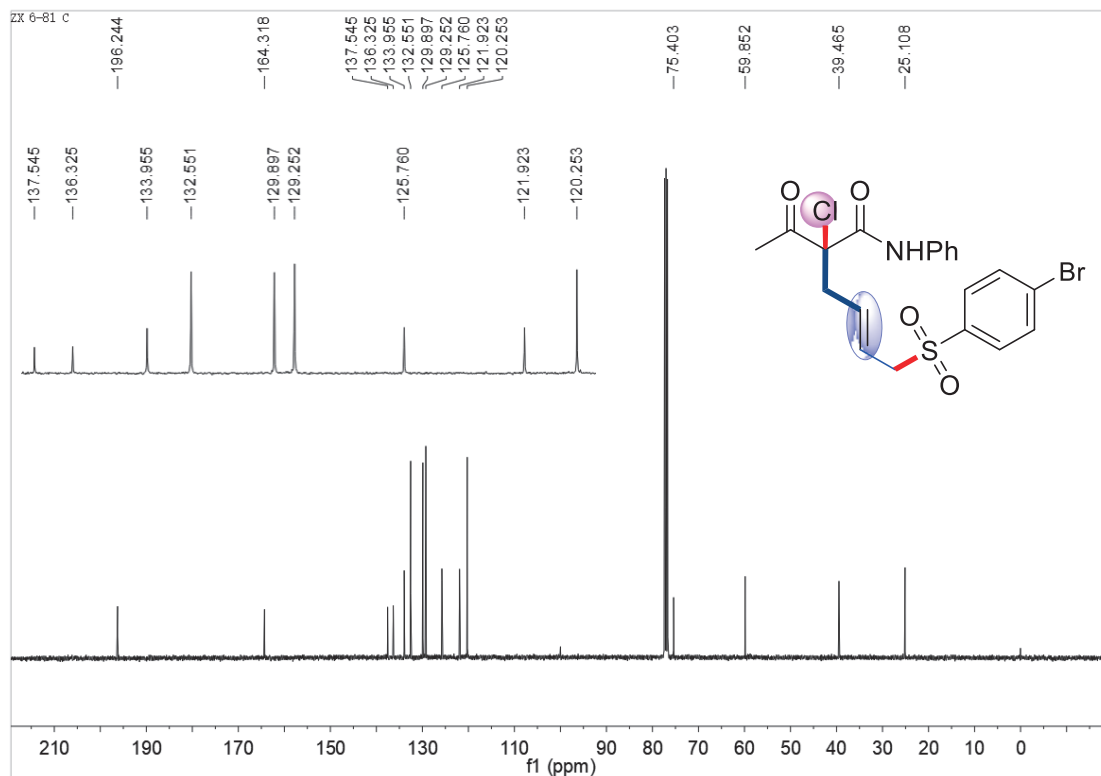

### 3j2 DEPT 90 and DEPT 135

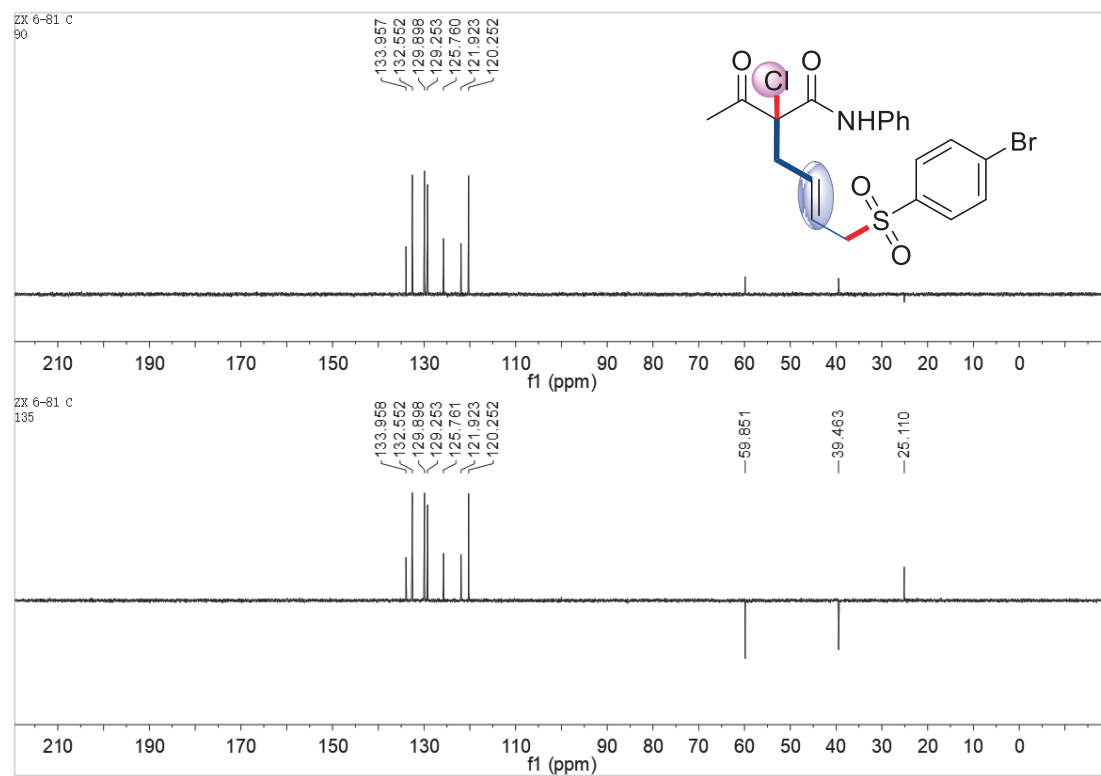

### 3j3, <sup>1</sup>H NMR

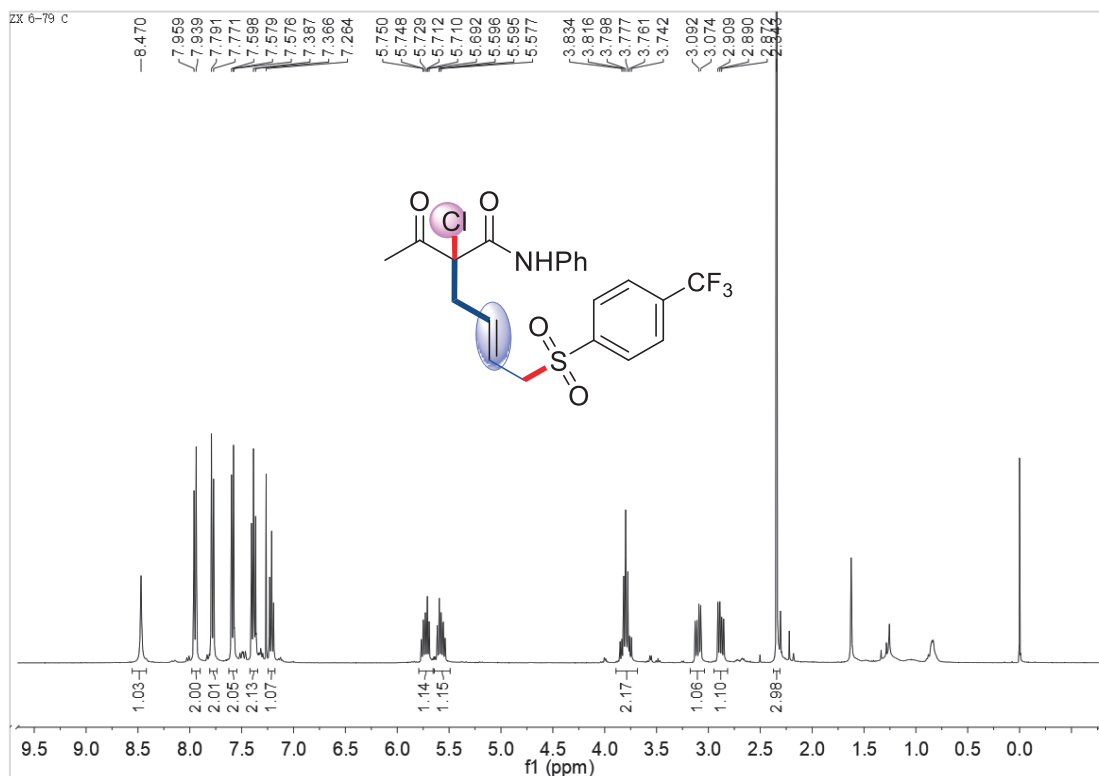

### 3j3, <sup>13</sup>C NMR

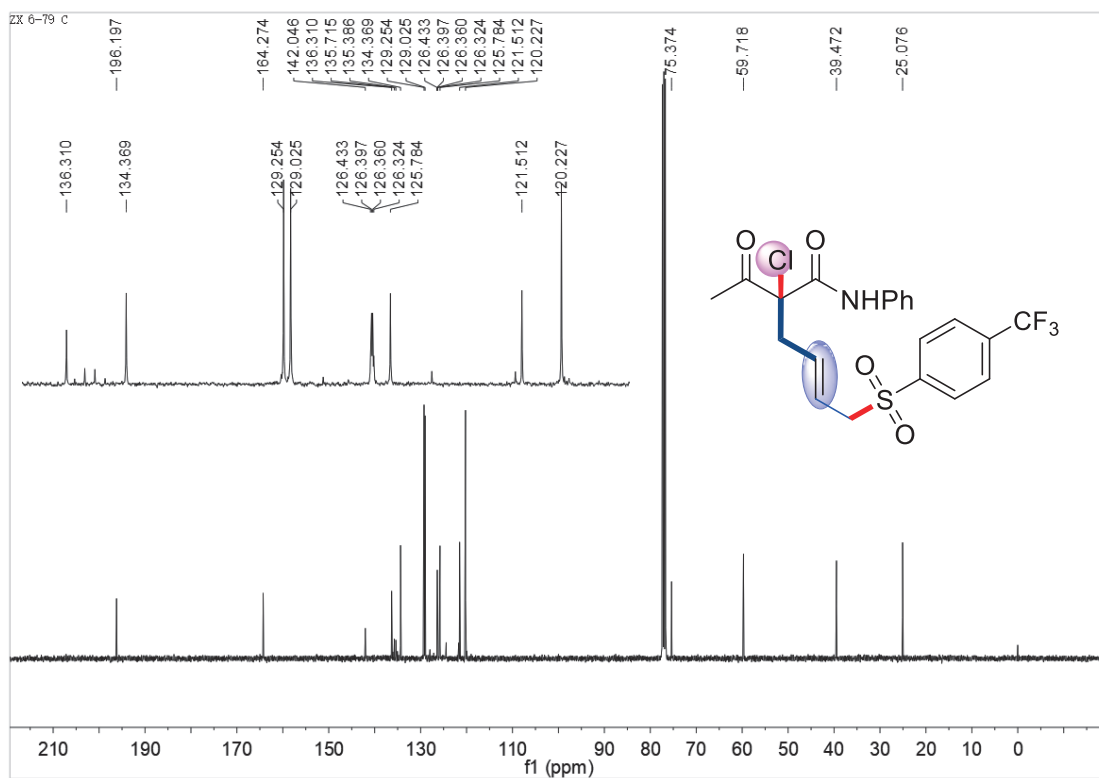



### 3j3 DEPT 90 and DEPT 135

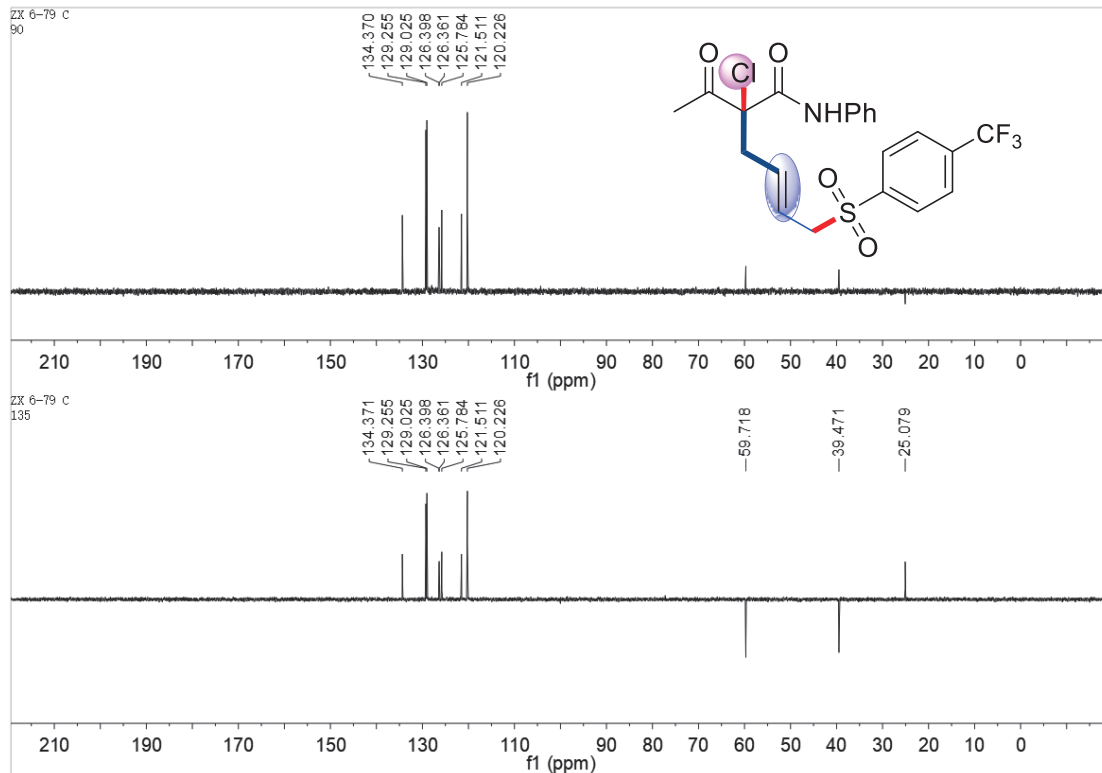

### 3j3 <sup>19</sup>F NMR

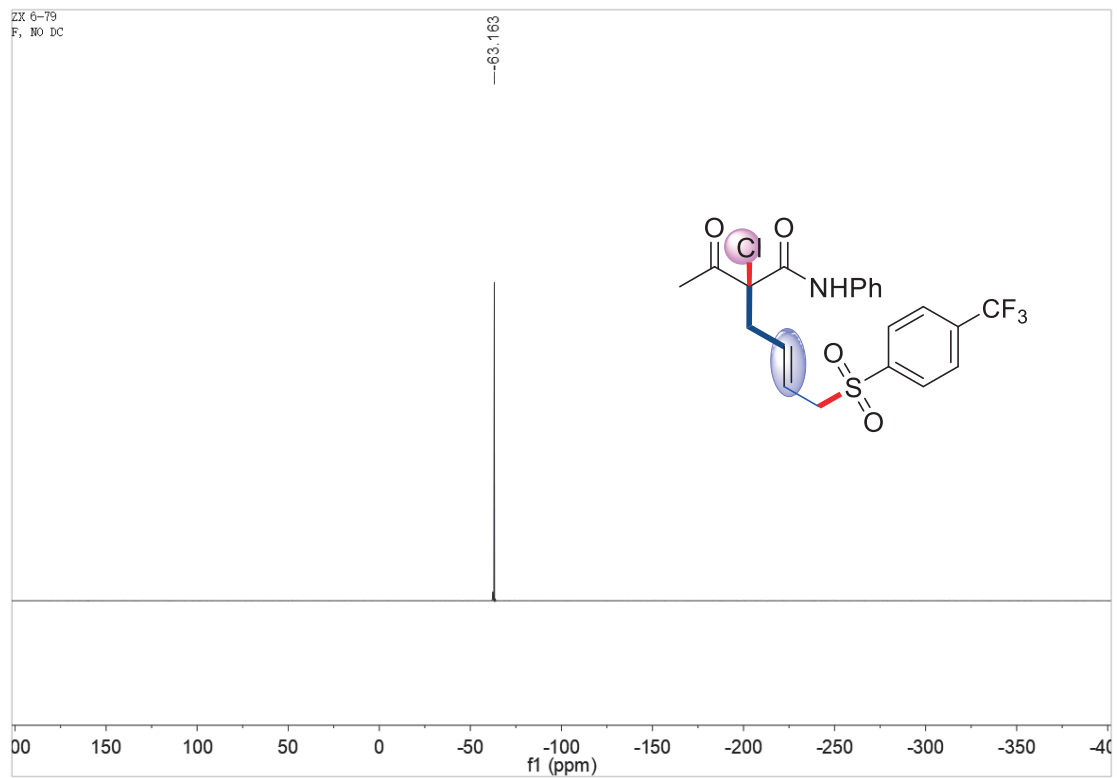

### 3j4, <sup>1</sup>H NMR

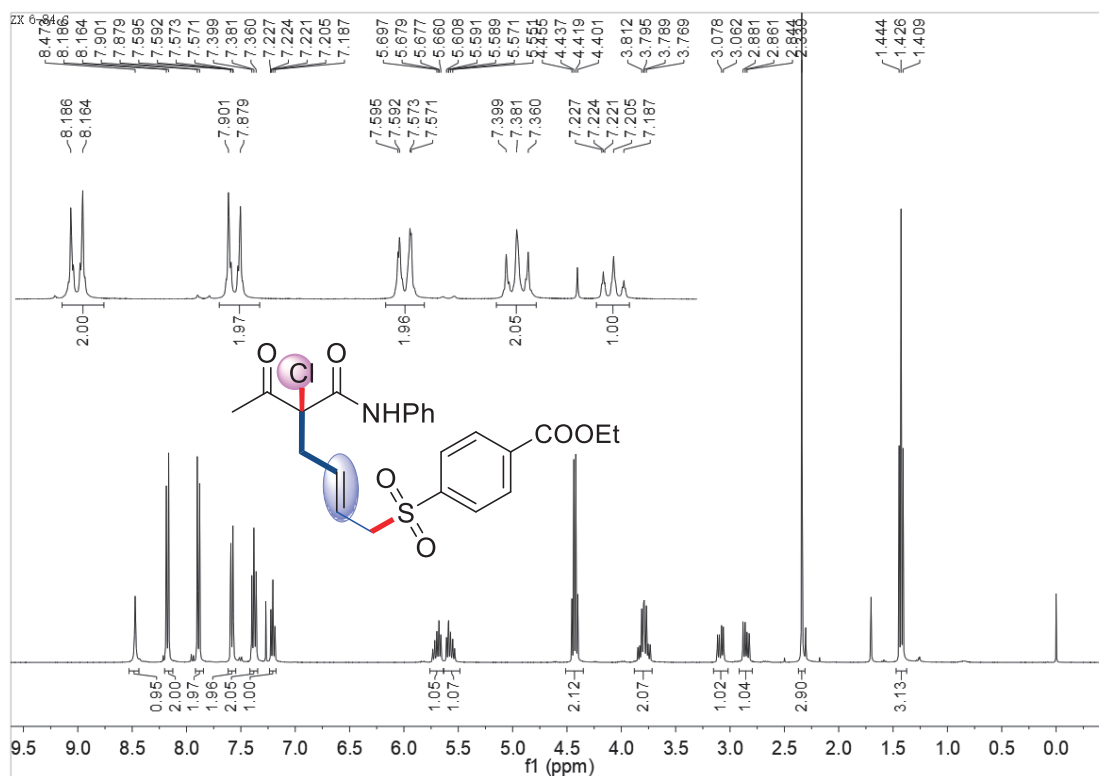

### 3j4, <sup>13</sup>C NMR

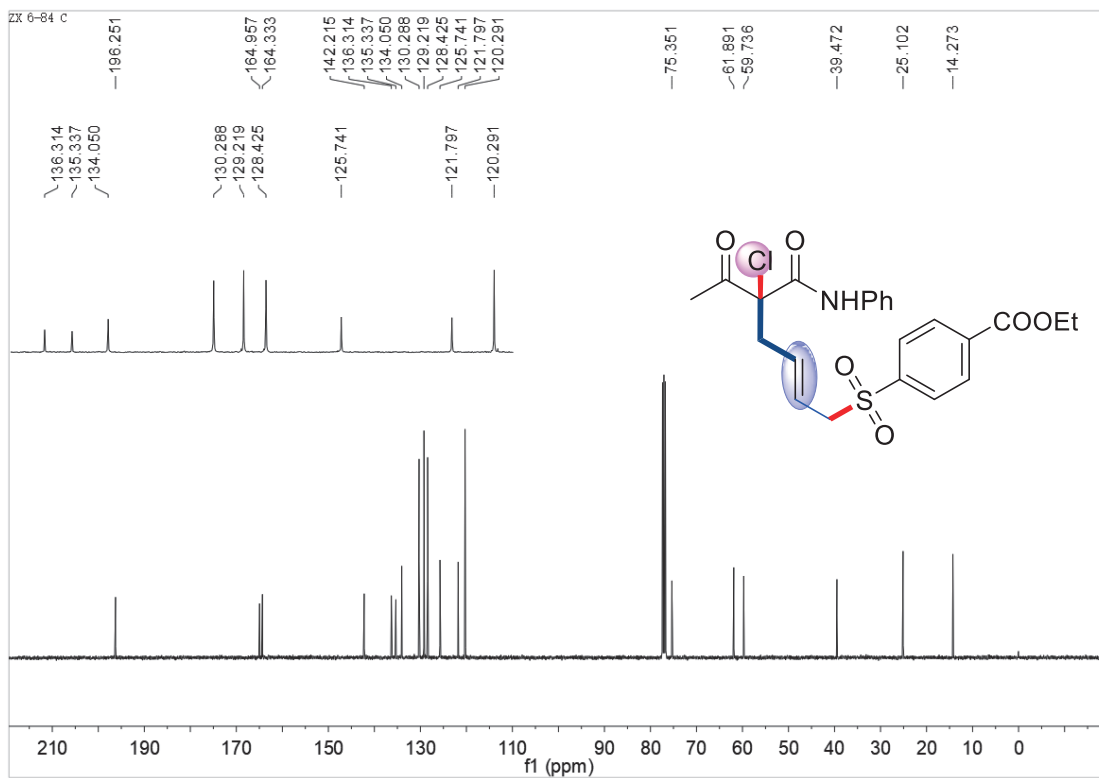



### 3j5, $^{13}\text{C}$ NMR

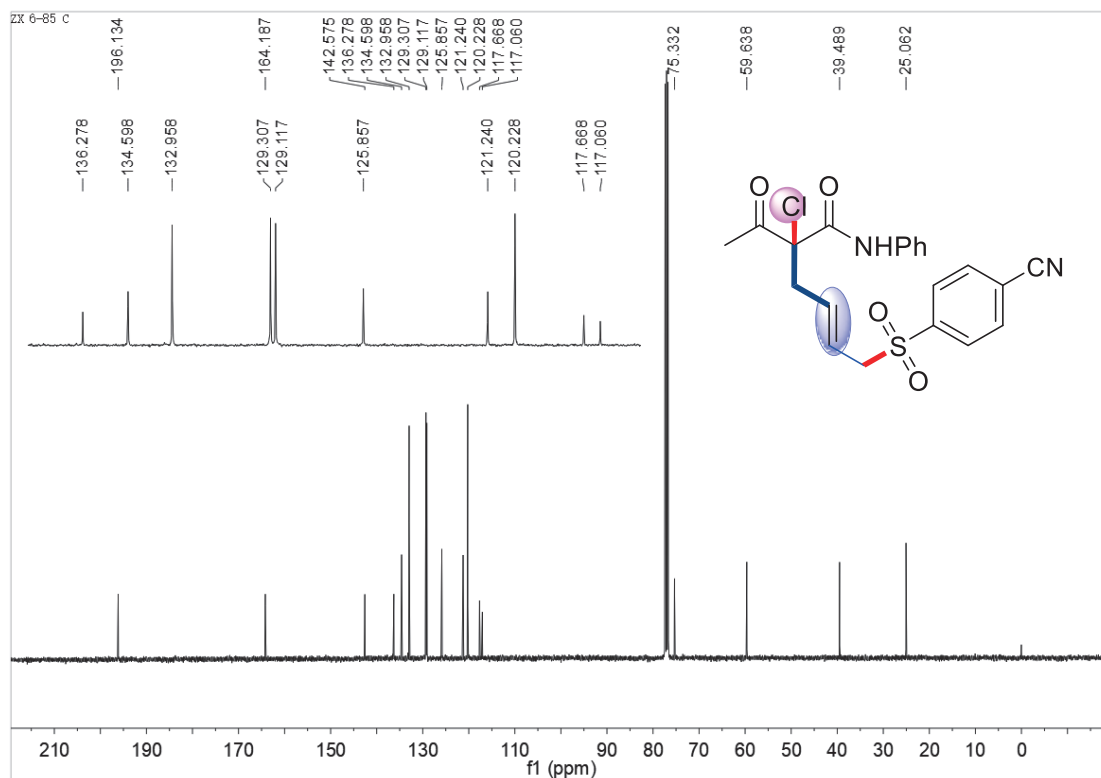

### 3j5, DEPT 90 and DEPT 135

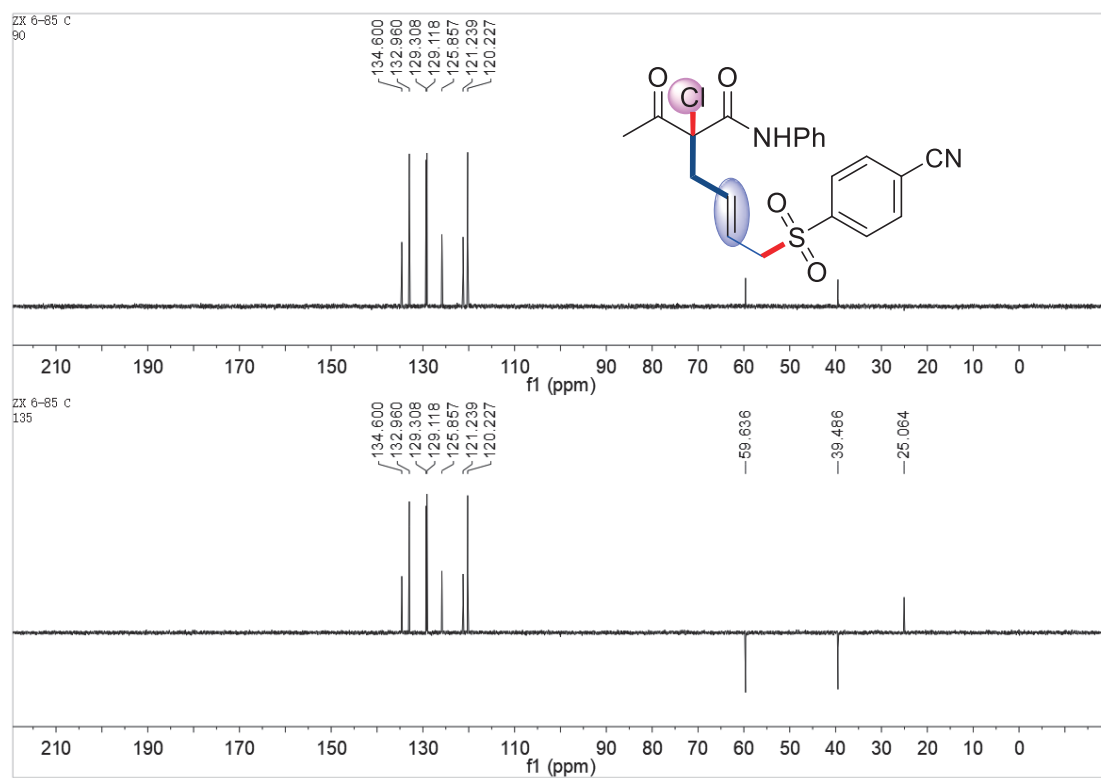

### 3k, <sup>1</sup>H NMR

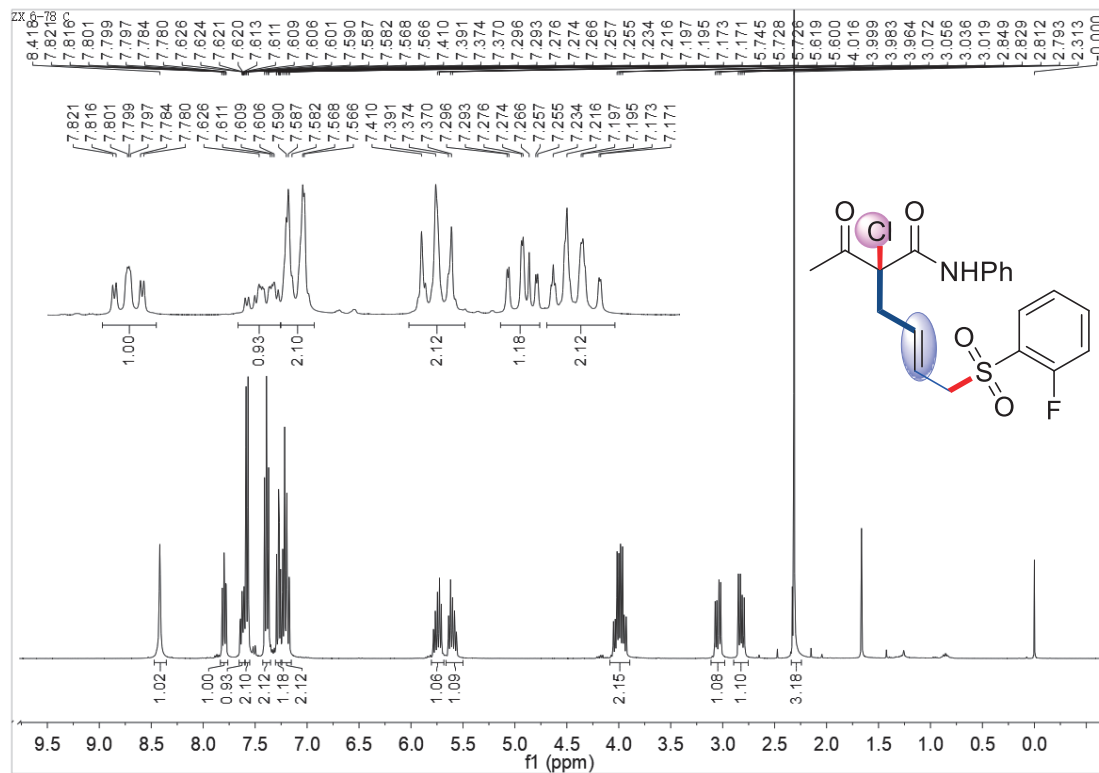

### 3k, <sup>13</sup>C NMR

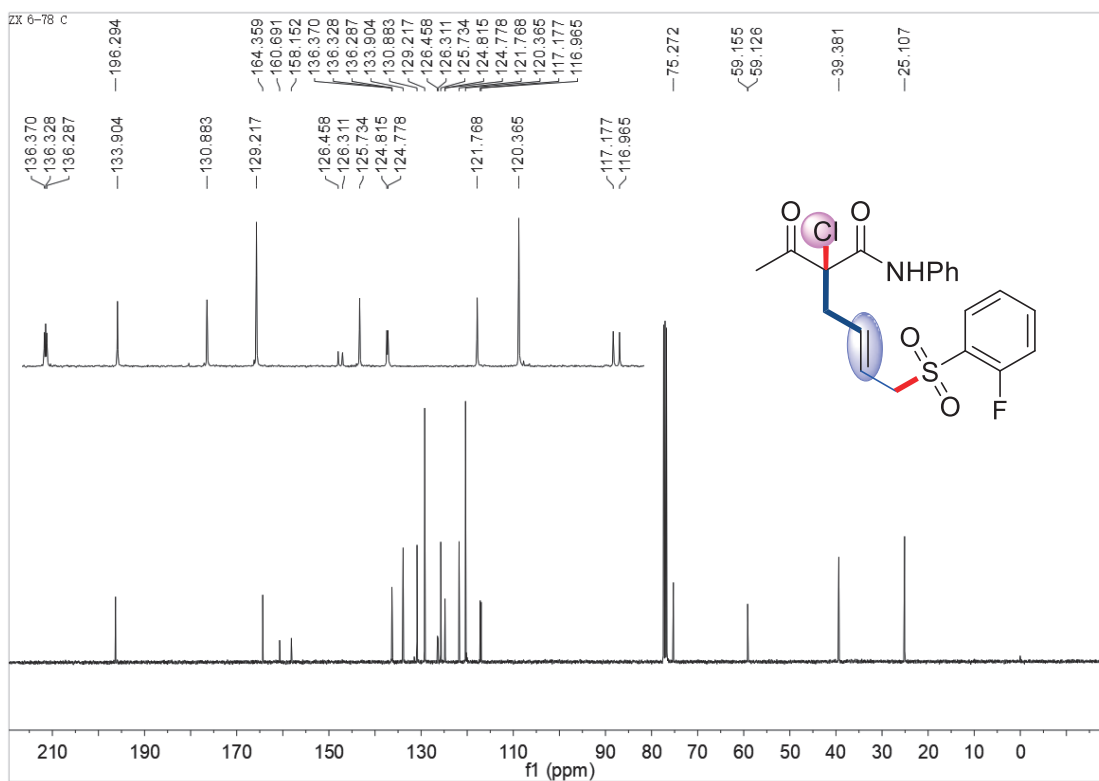

### 3k DEPT 90 and DEPT 135

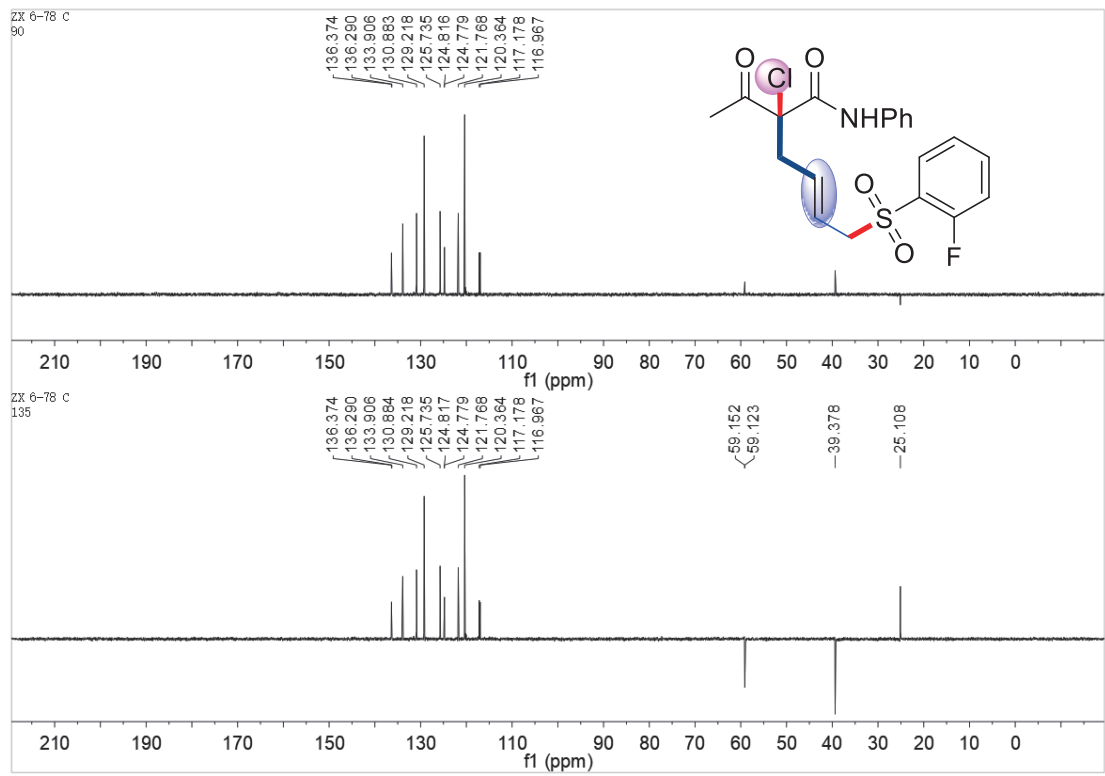

### 3k <sup>19</sup>F NMR

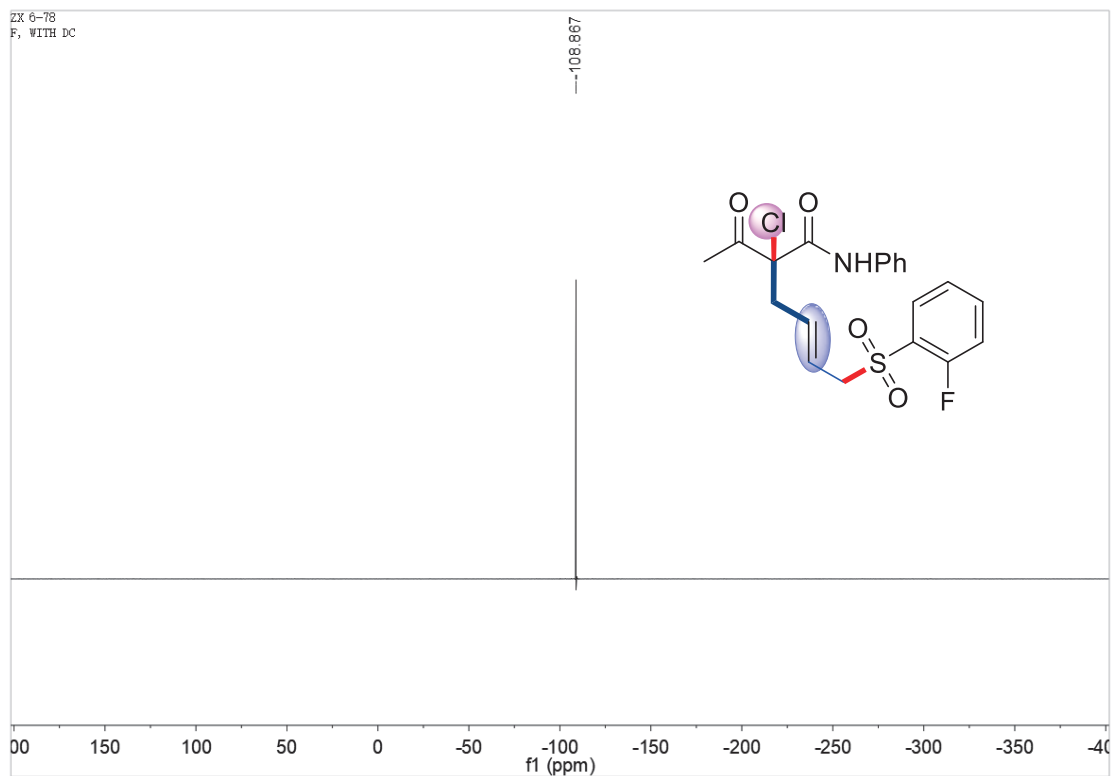



### 311, DEPT 90 and DEPT 135

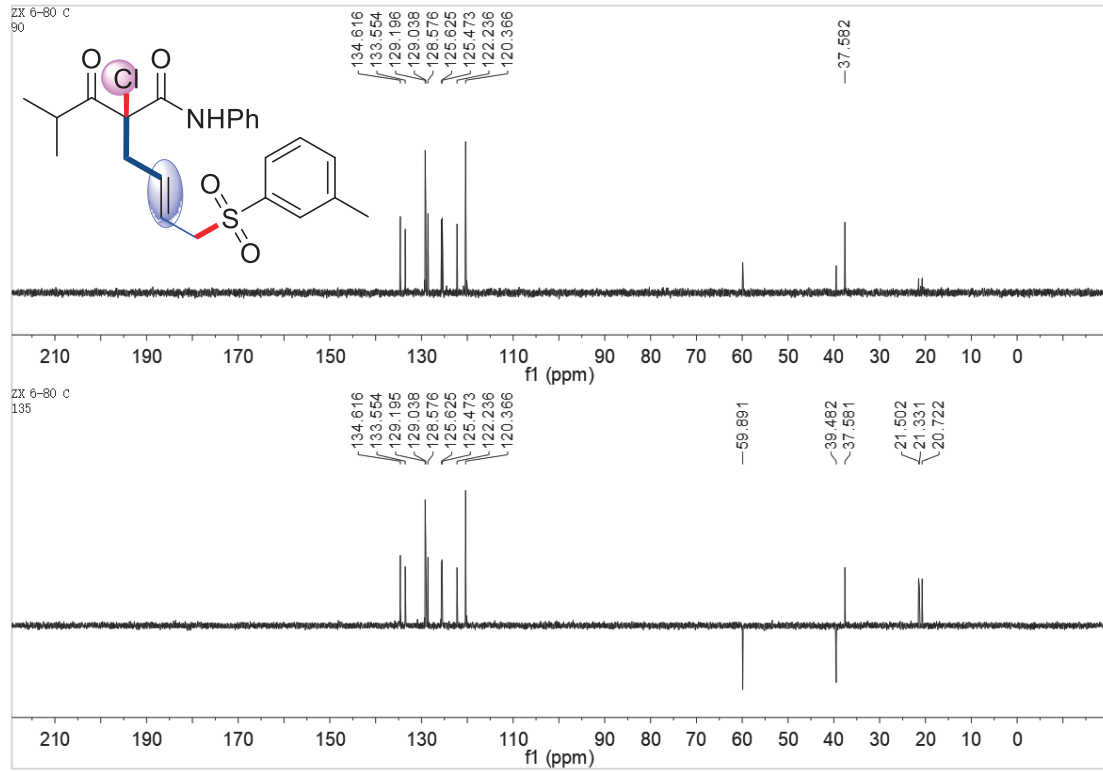

### 312, <sup>1</sup>H NMR

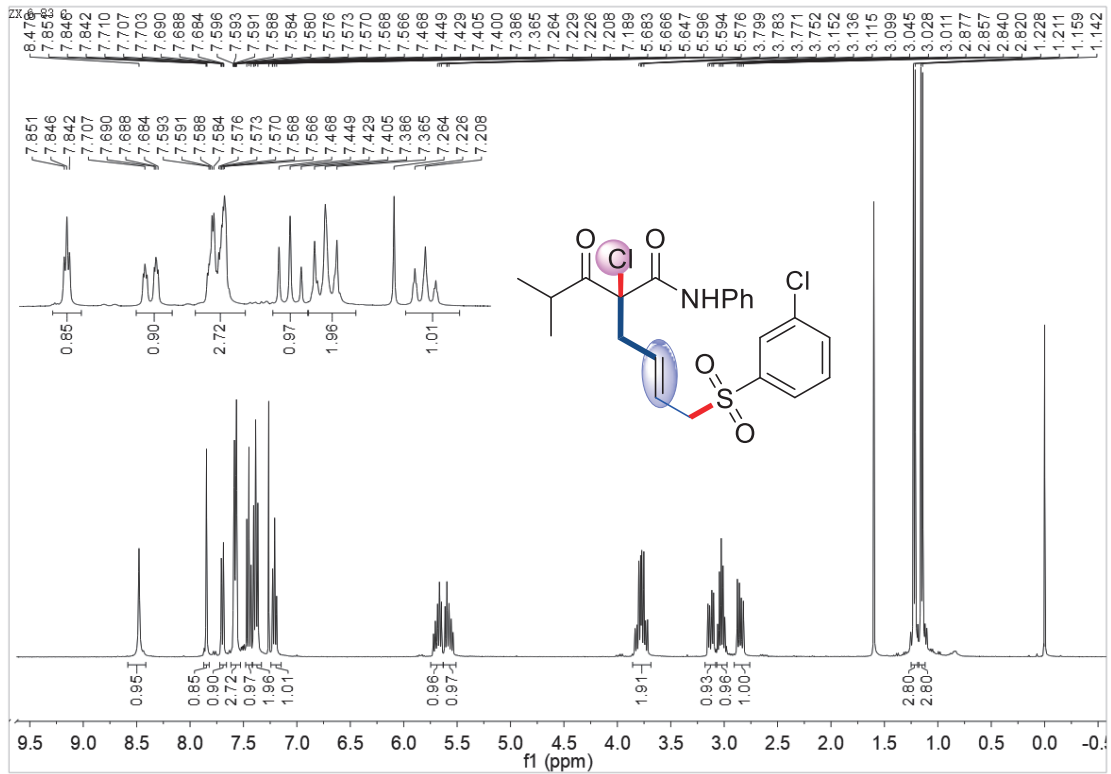



### 312, <sup>13</sup>C NMR

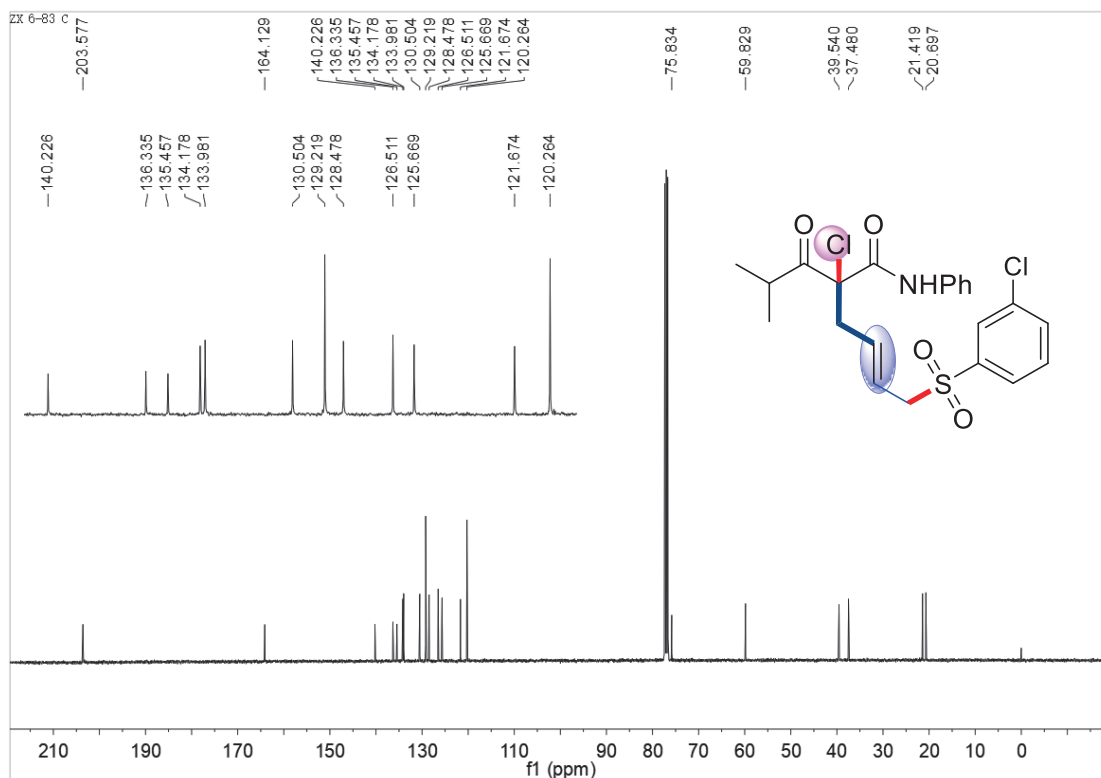

### 312 DEPT 90 and DEPT 135

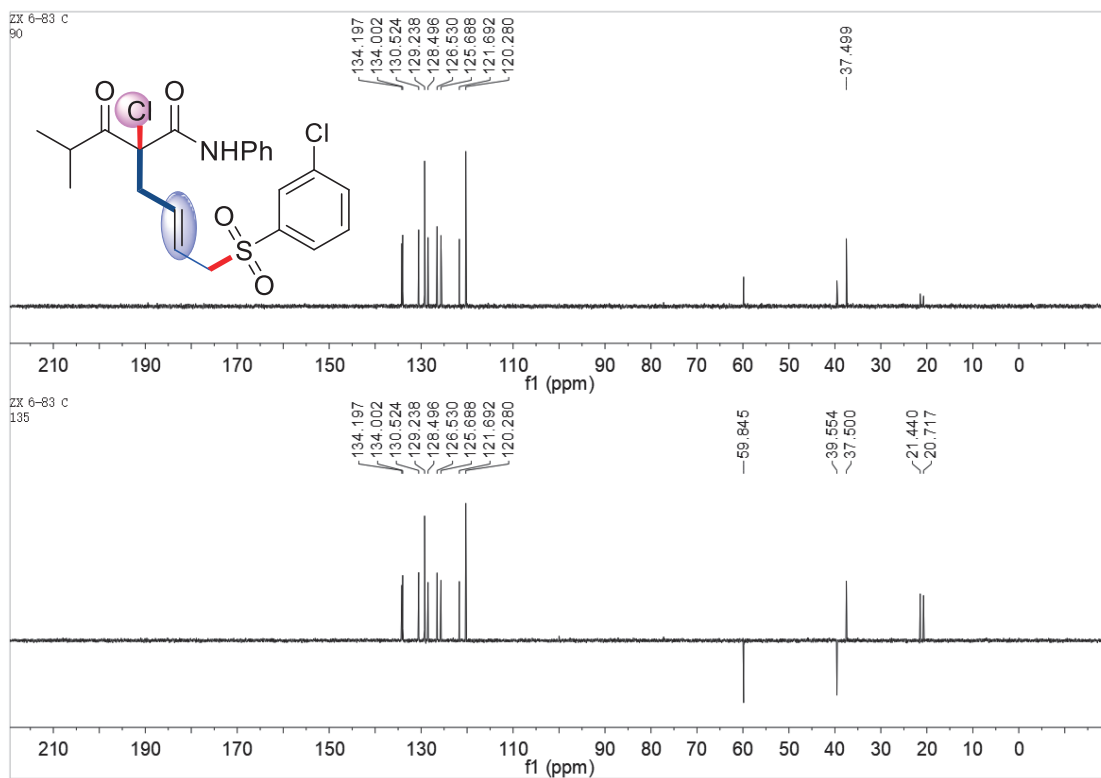

### 3m, <sup>1</sup>H NMR

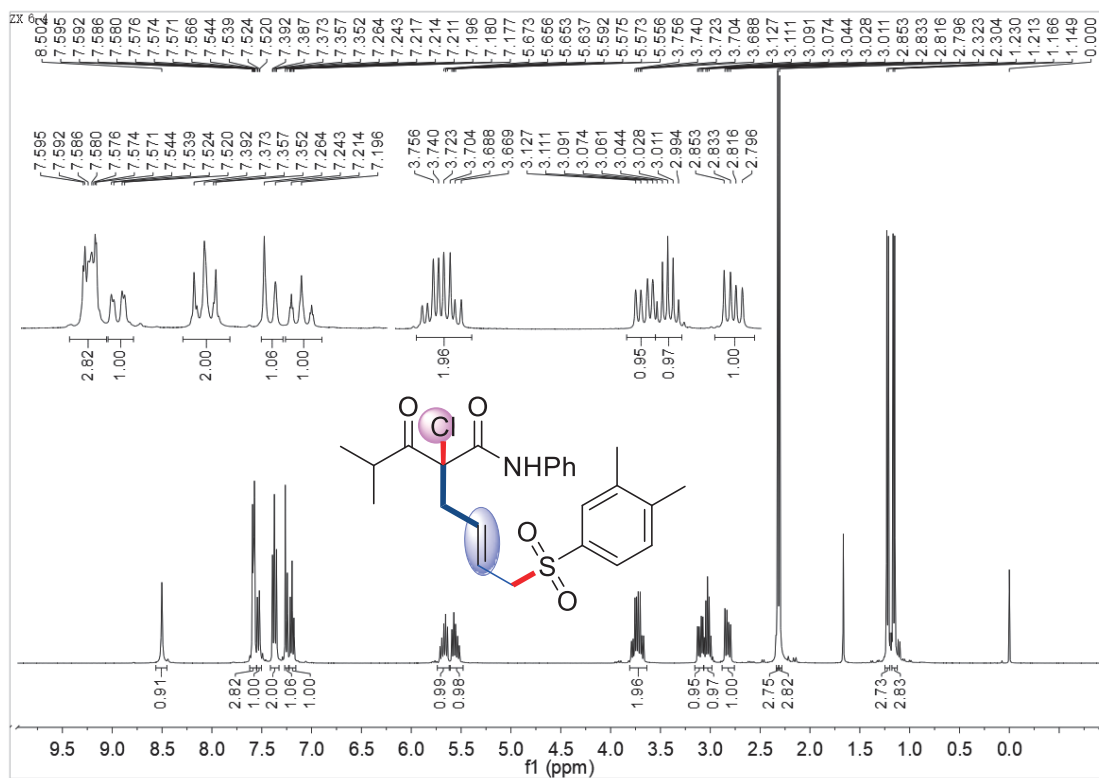

### 3m, <sup>13</sup>C NMR

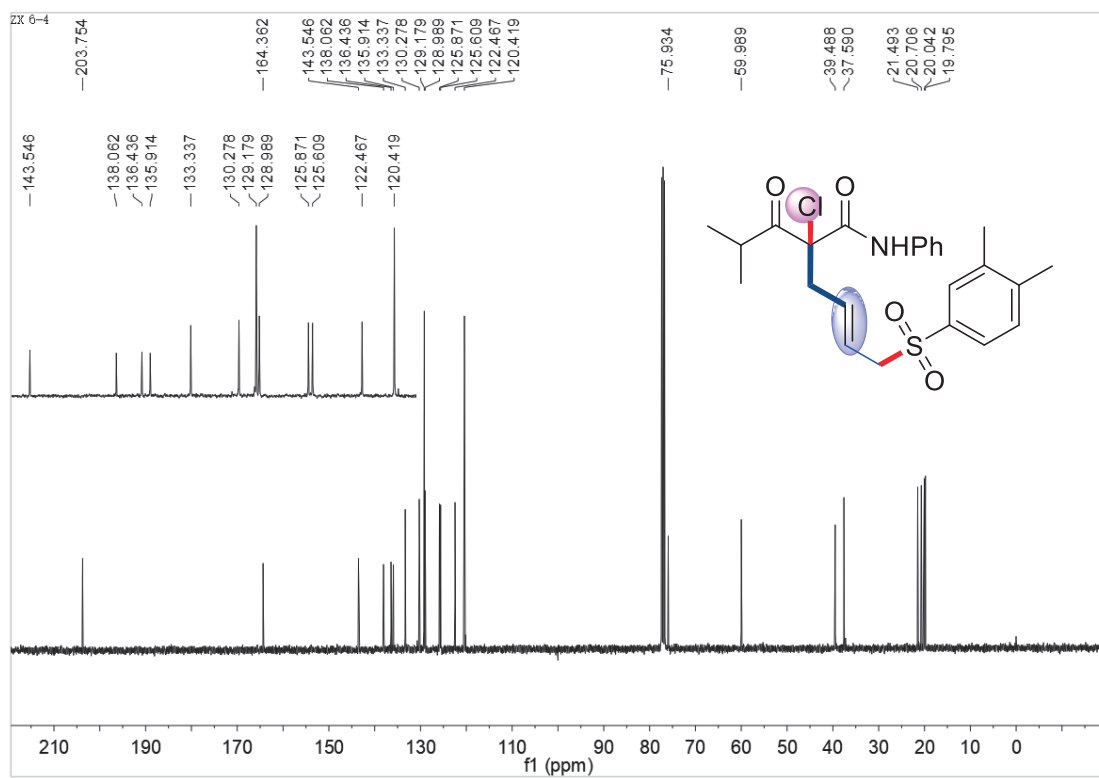

**3m**, DEPT 90 and DEPT 135

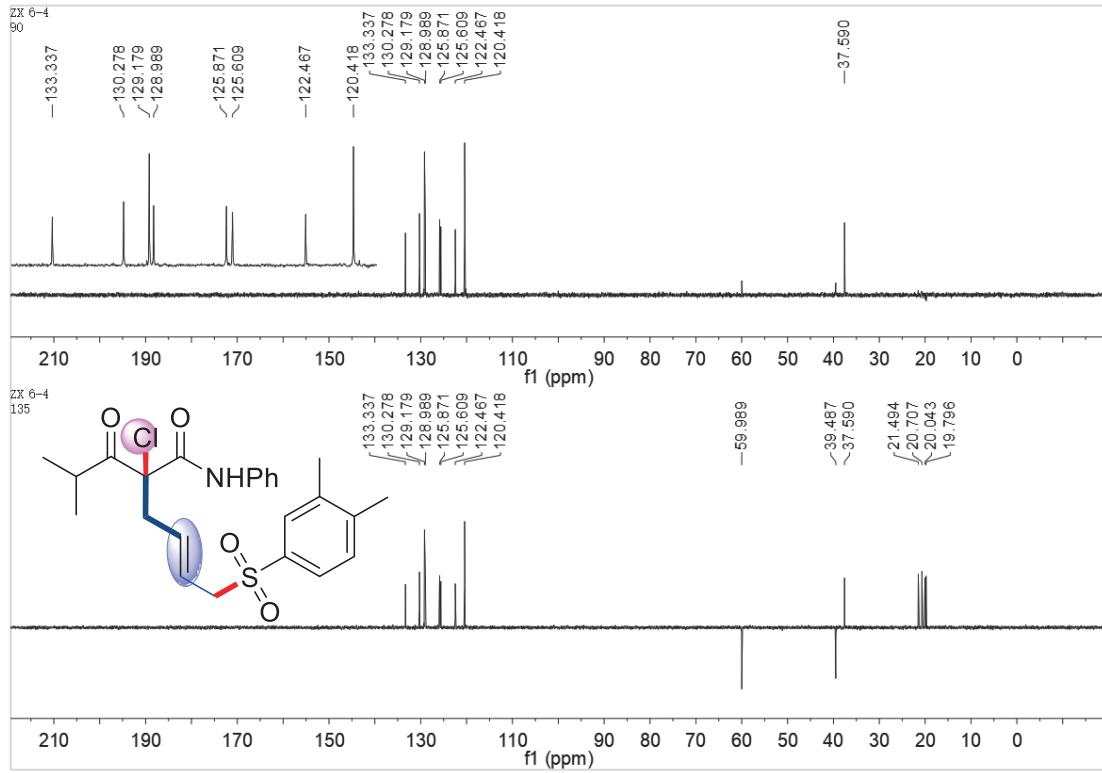

**3n**, <sup>1</sup>H NMR

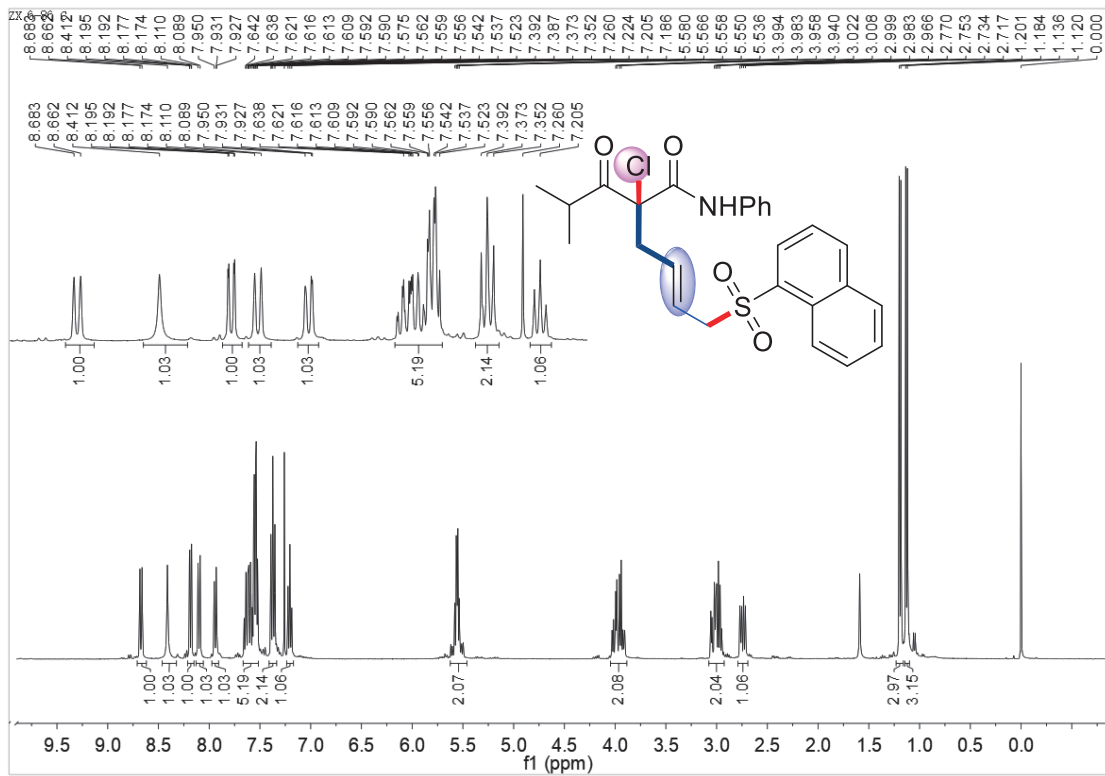

### 3n, <sup>13</sup>C NMR

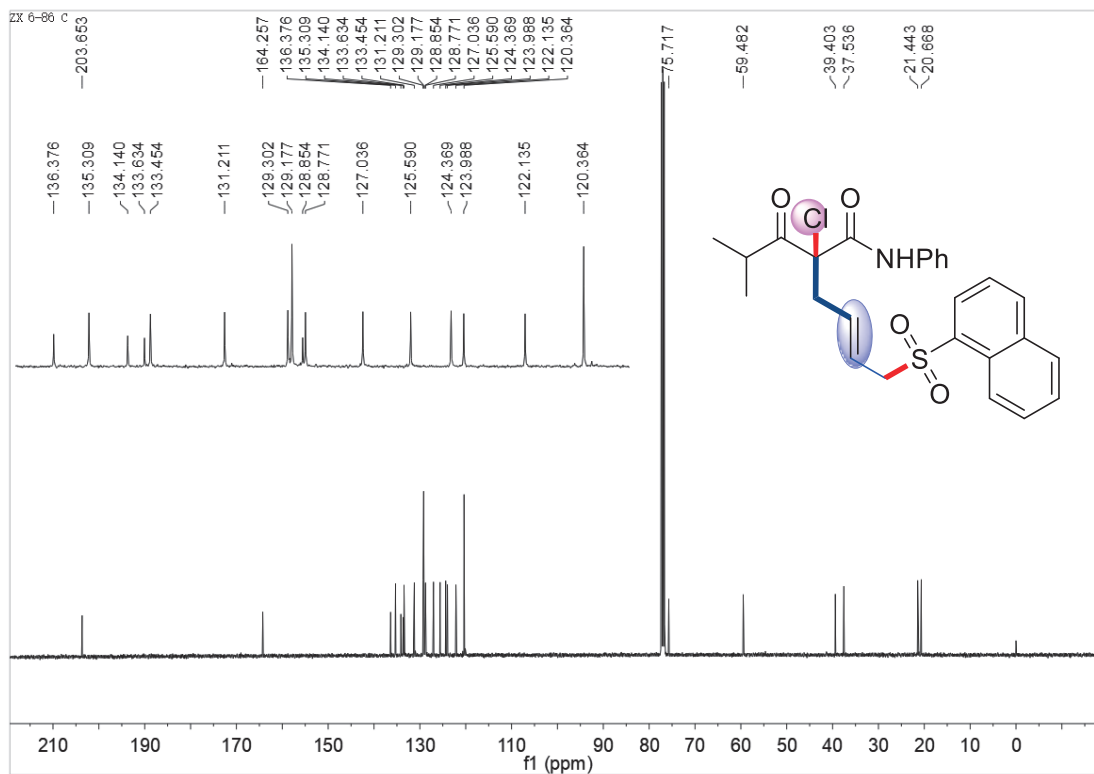

### 3n, DEPT 90 and DEPT 135

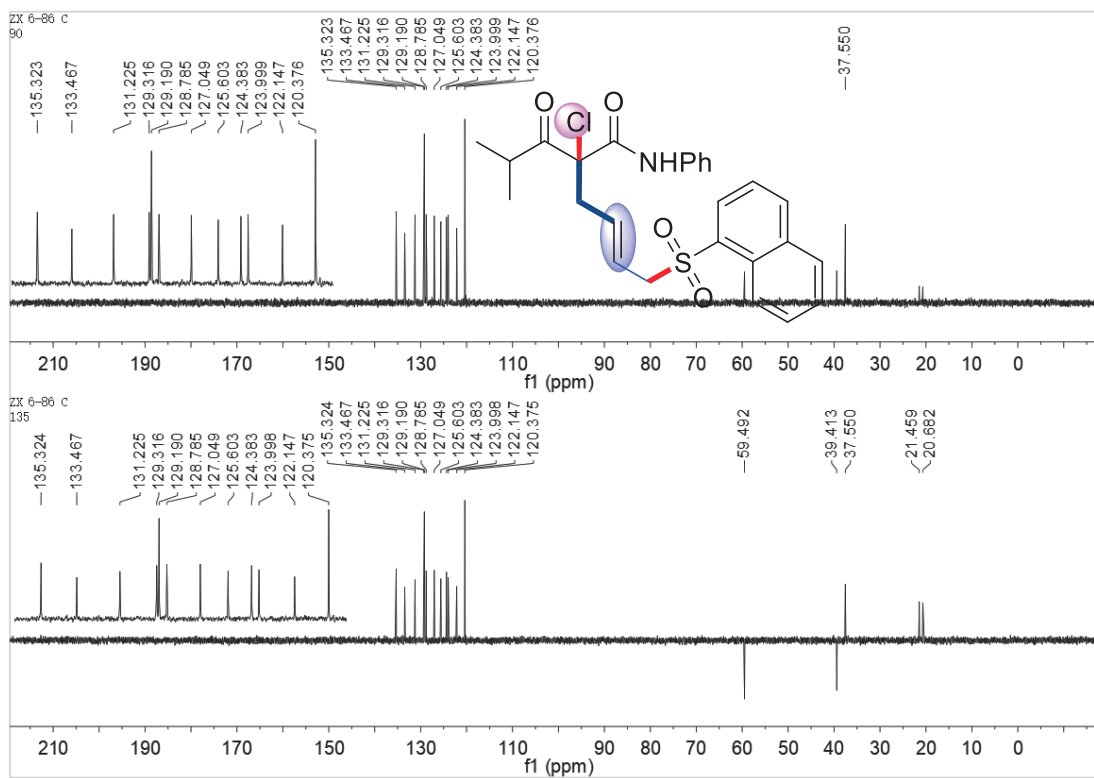

### 30, <sup>1</sup>H NMR

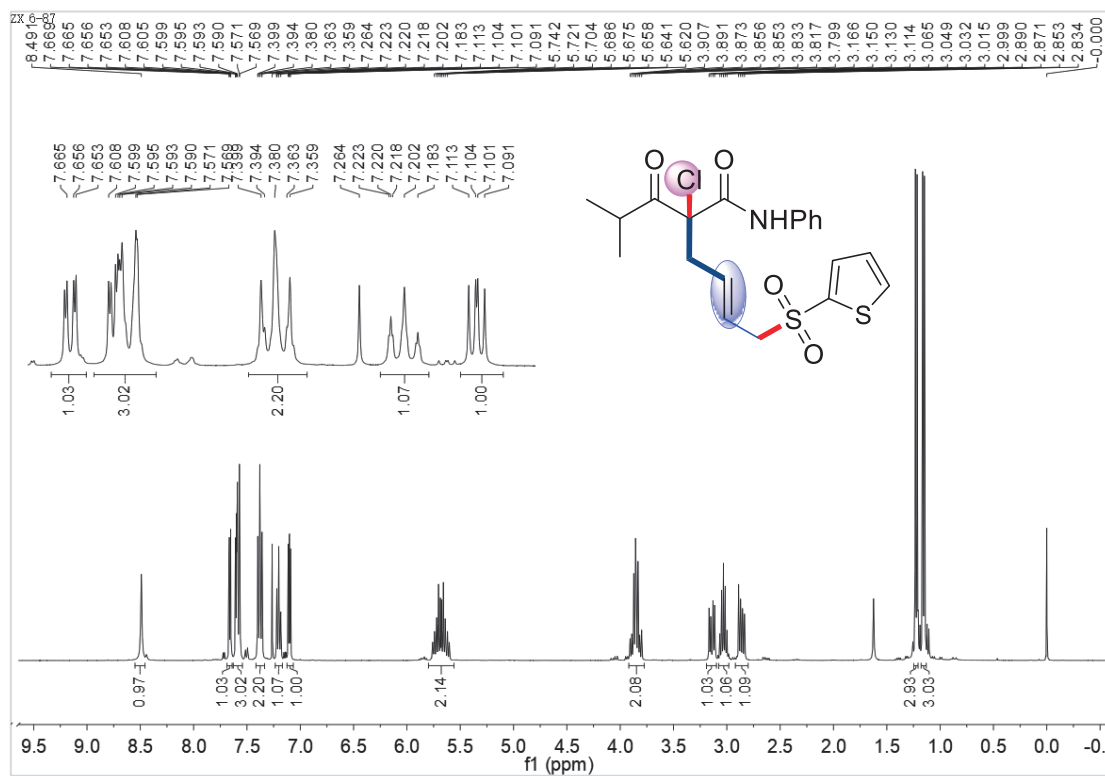

### 30, <sup>13</sup>C NMR

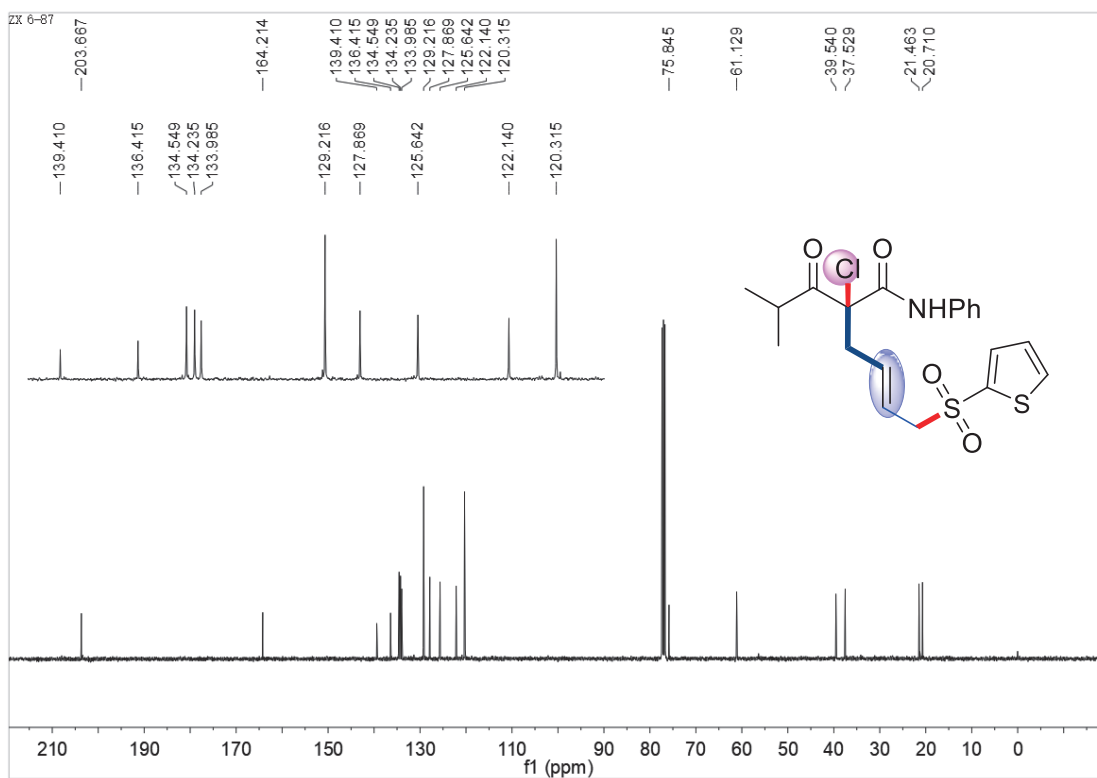



### 3p, <sup>13</sup>C NMR

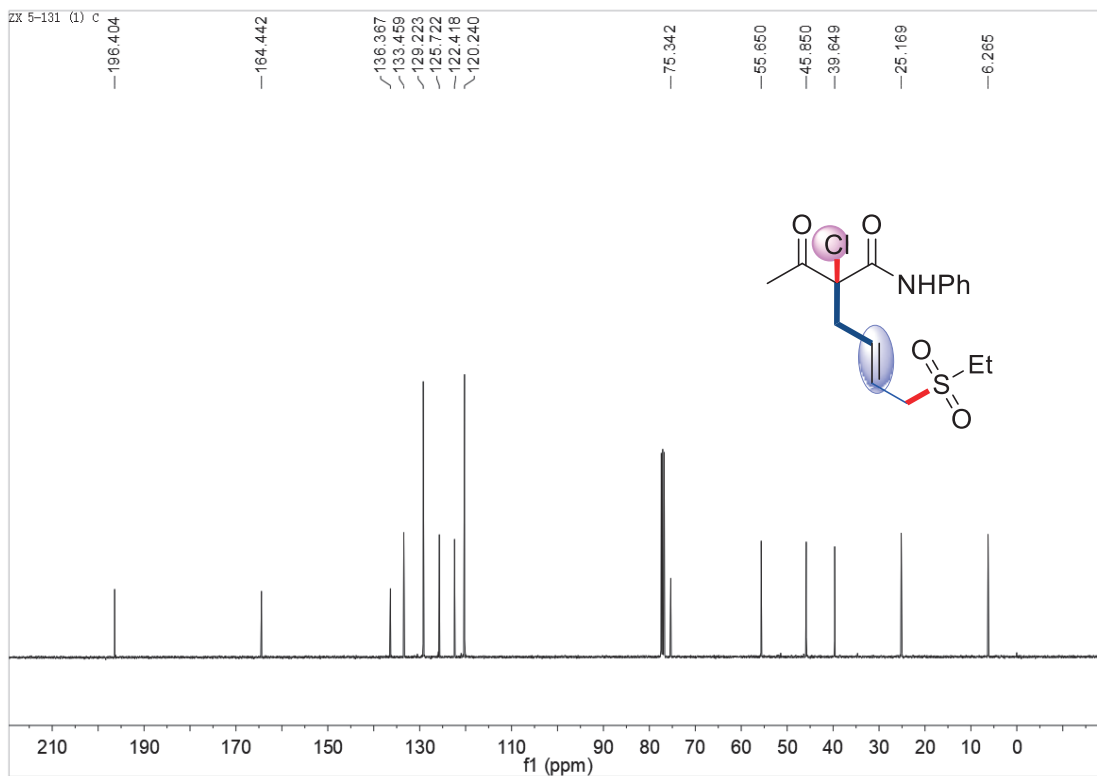

### 3p, DEPT 90 and DEPT 135

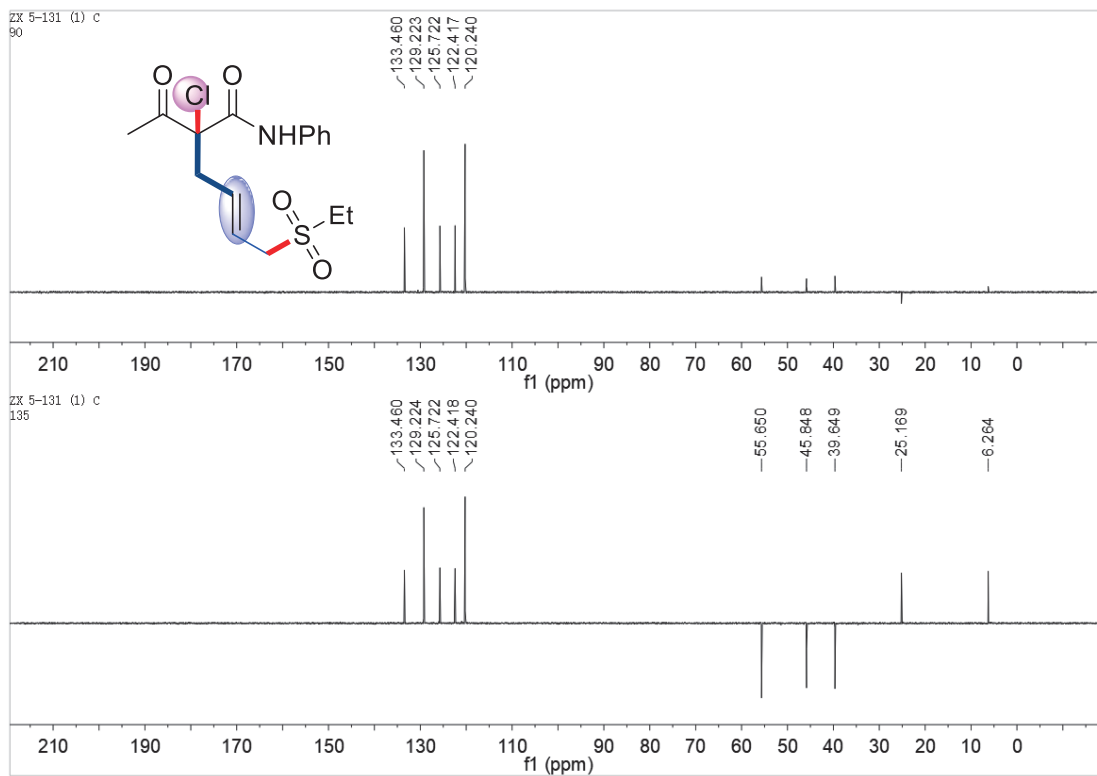

### 4a, <sup>1</sup>H NMR

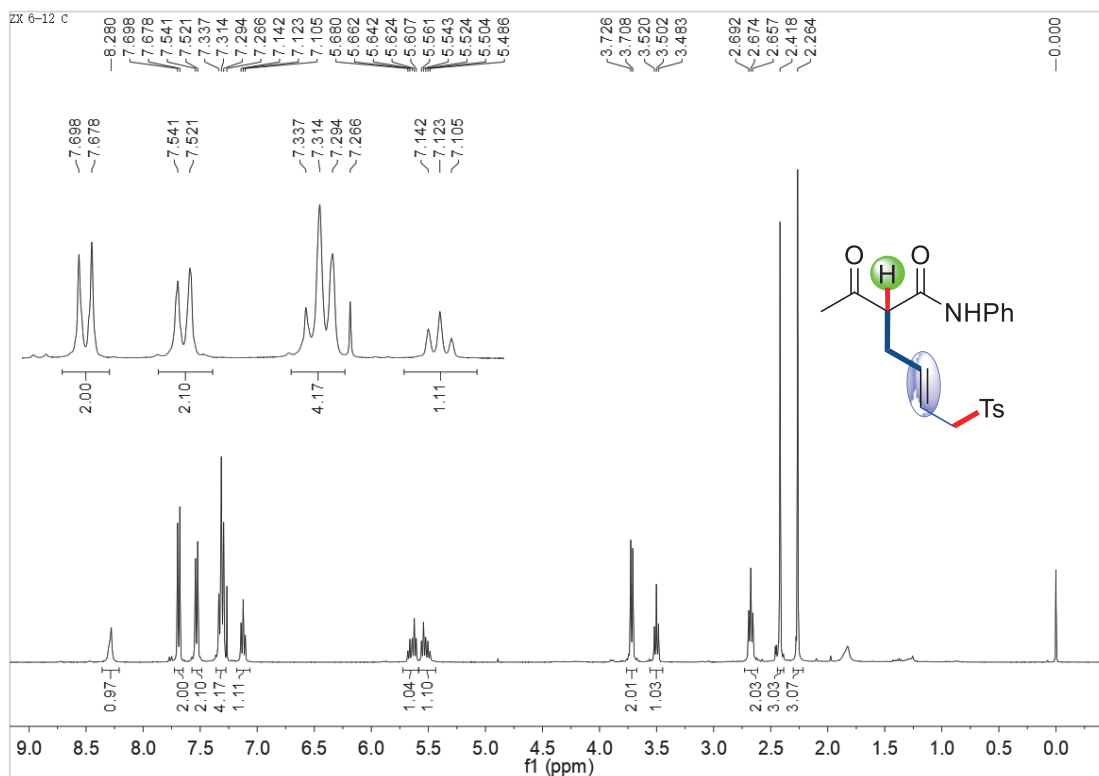

### 4a, <sup>13</sup>C NMR

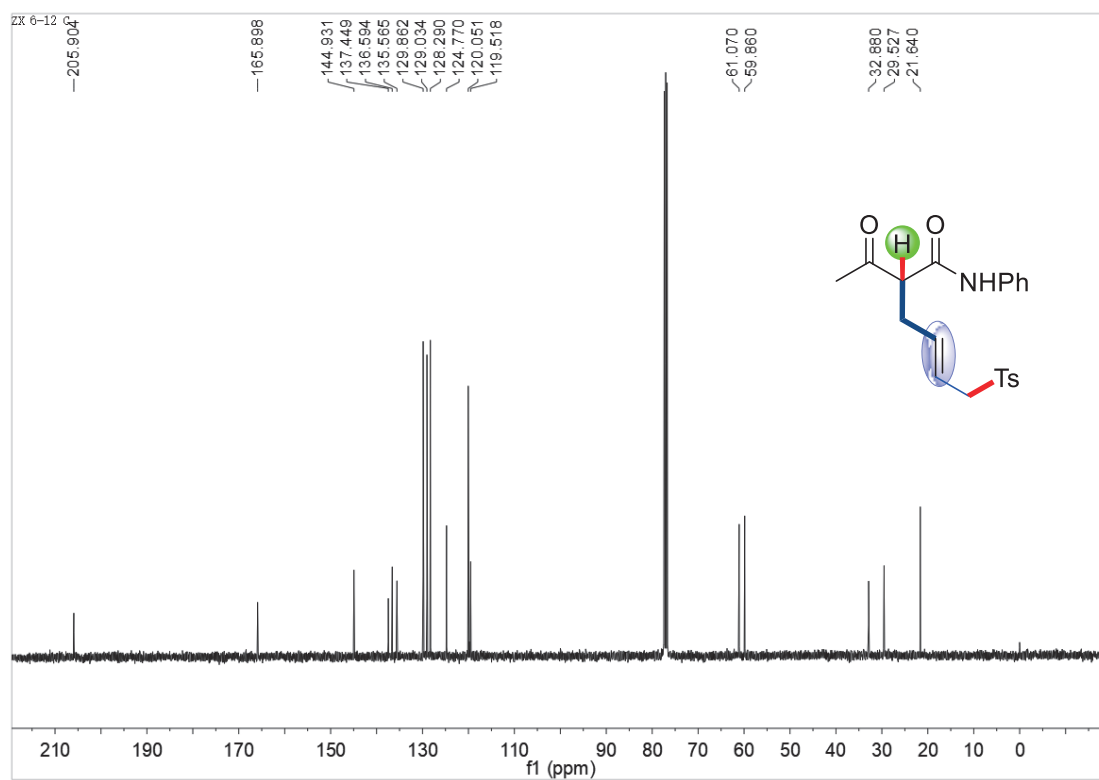



**4a**, DEPT 90 and DEPT 135

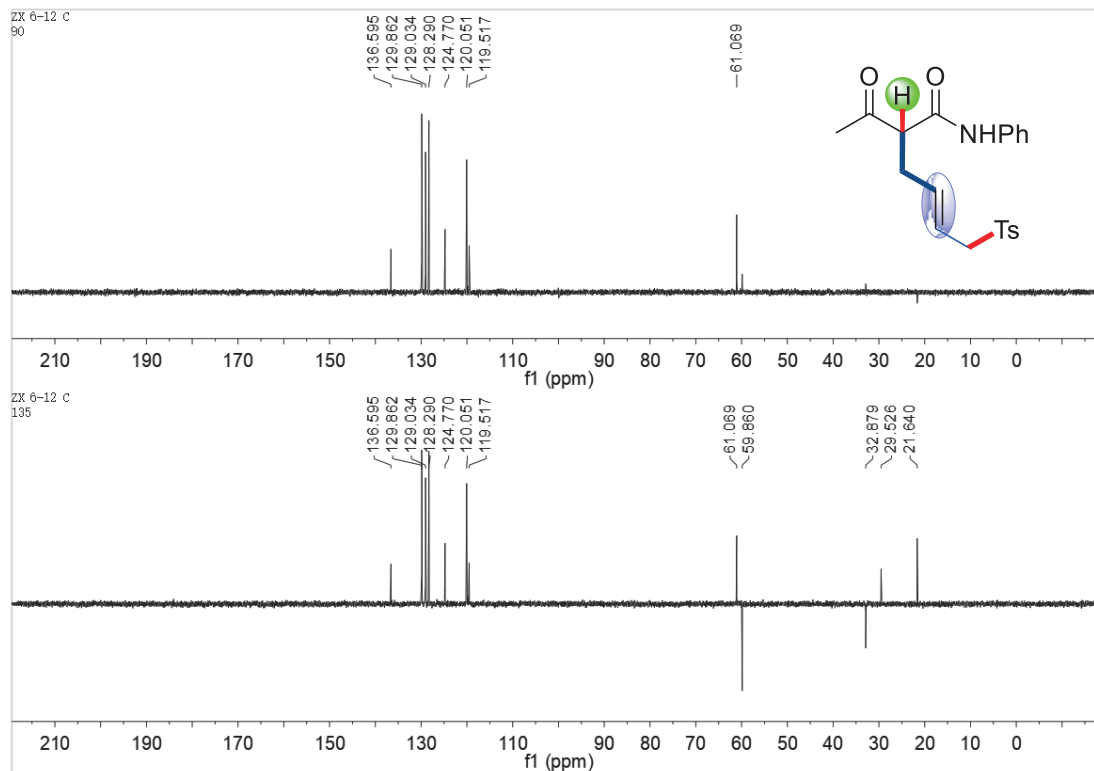

**4a1**,  $^1\text{H}$  NMR

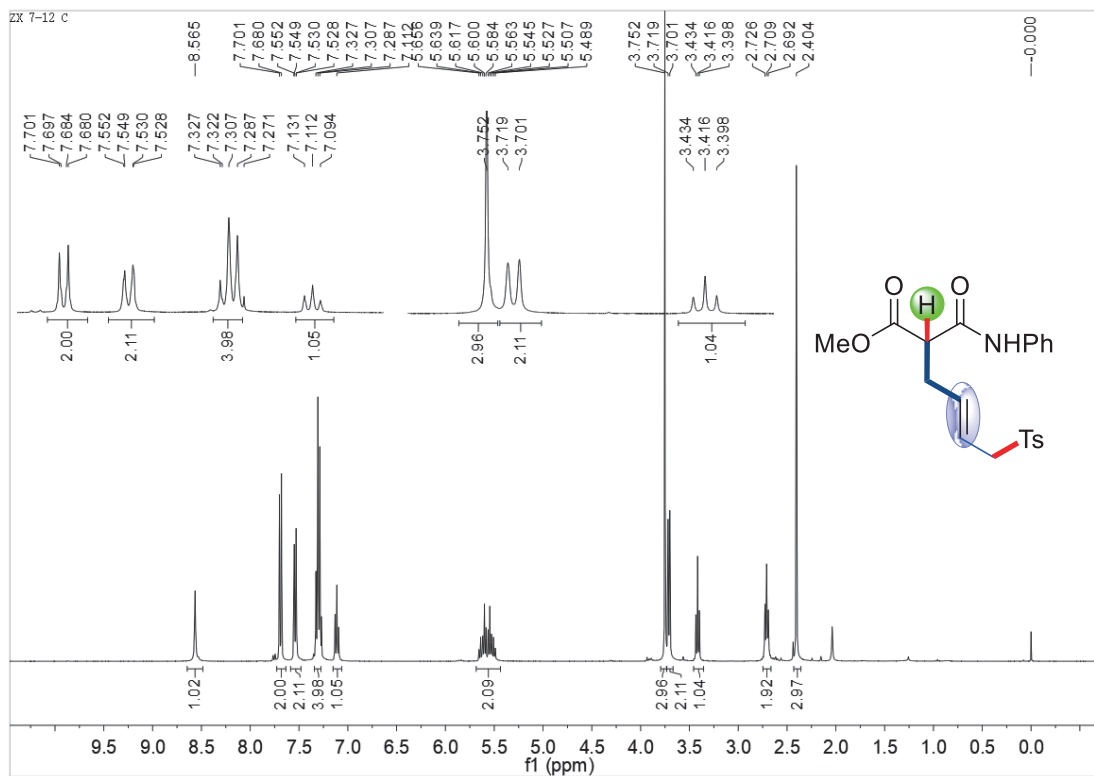

### 4a1, <sup>13</sup>C NMR

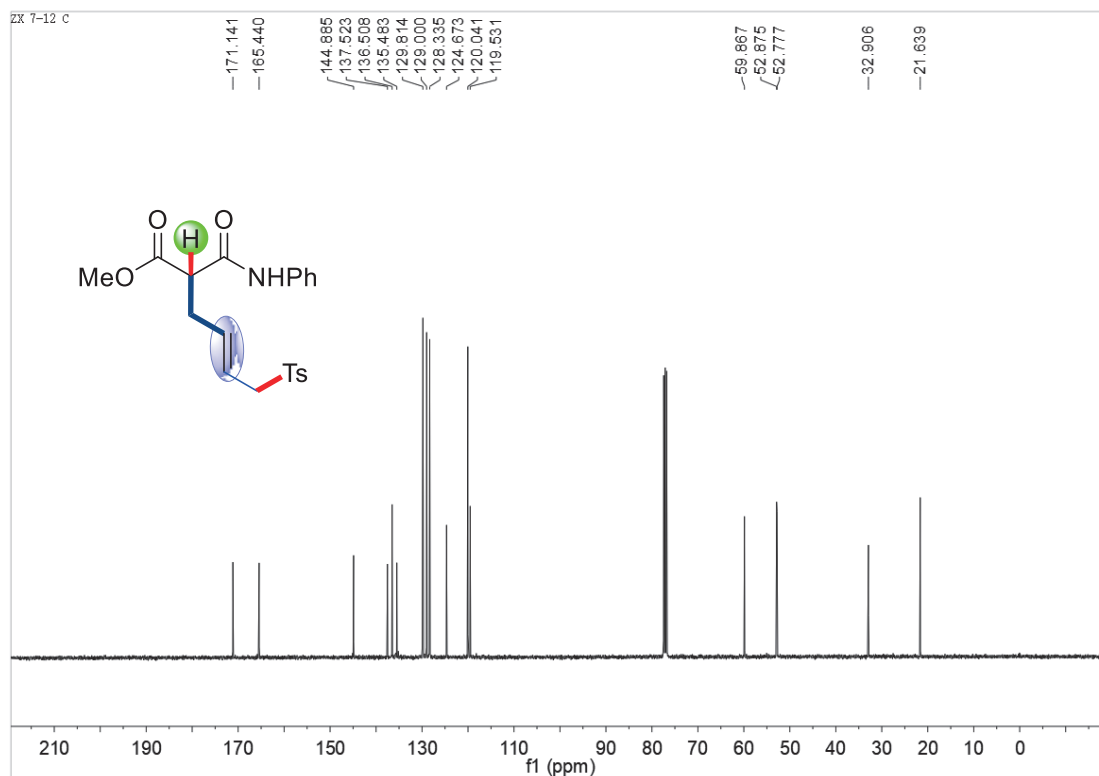

### 4a1, DEPT 90 and DEPT 135

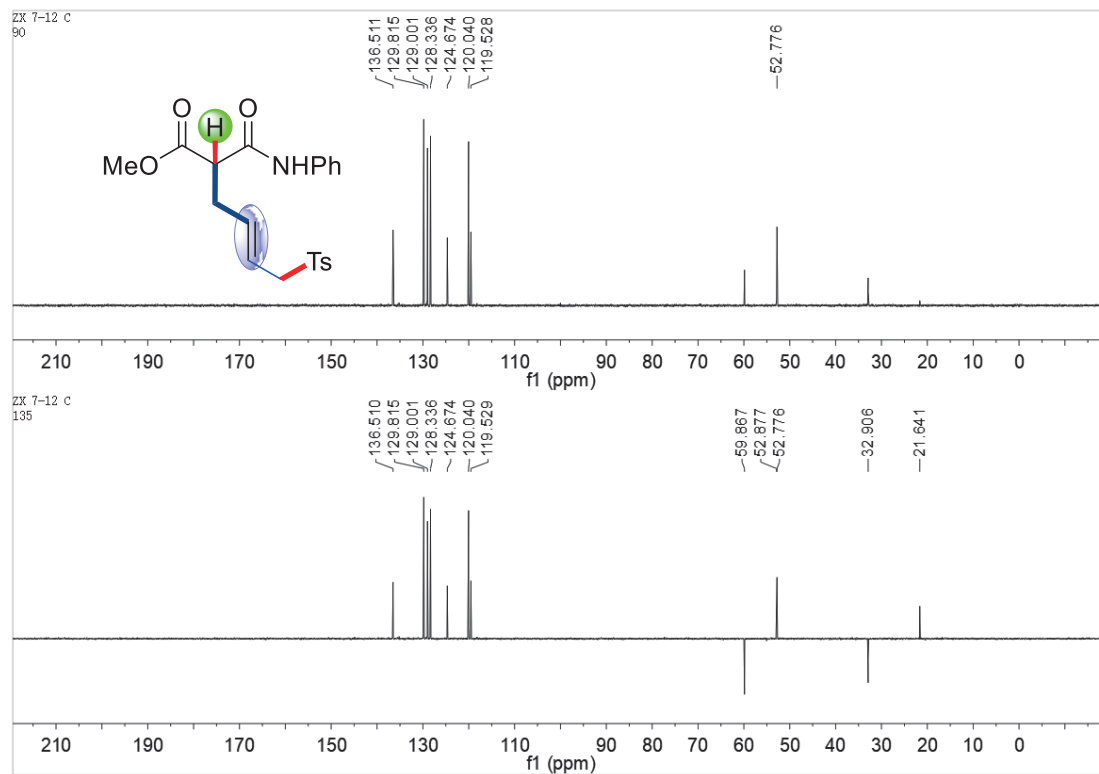

### 4a2, <sup>1</sup>H NMR

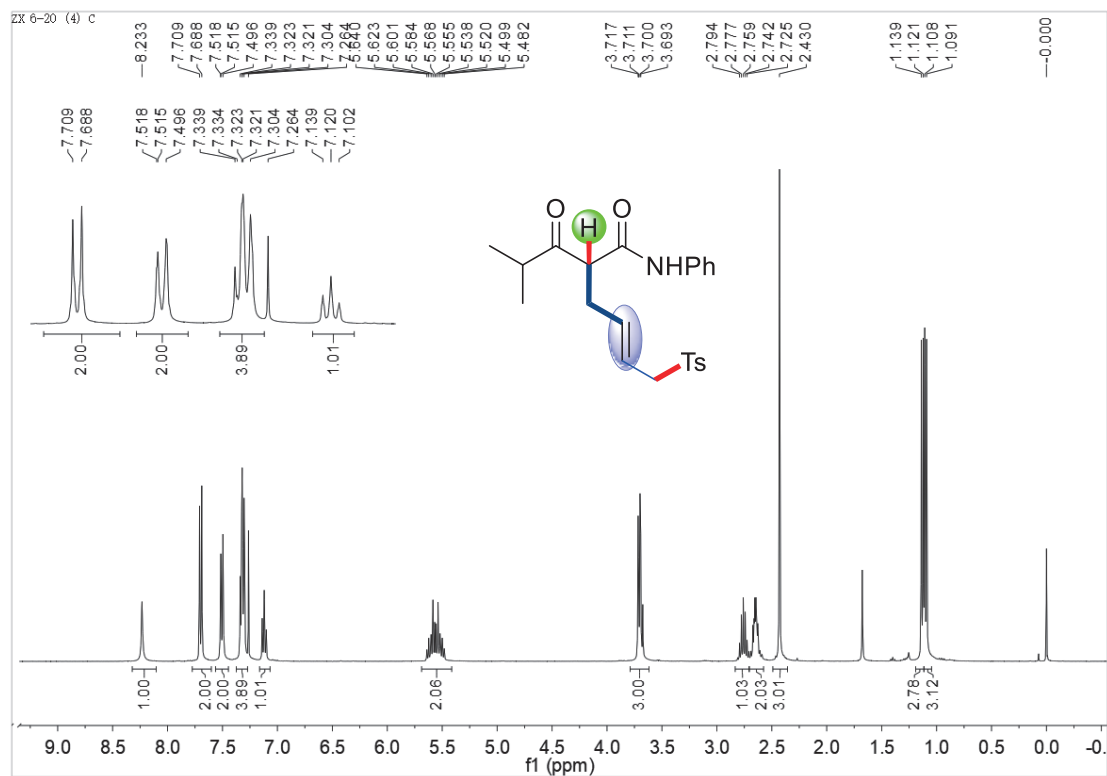

### 4a2, <sup>13</sup>C NMR

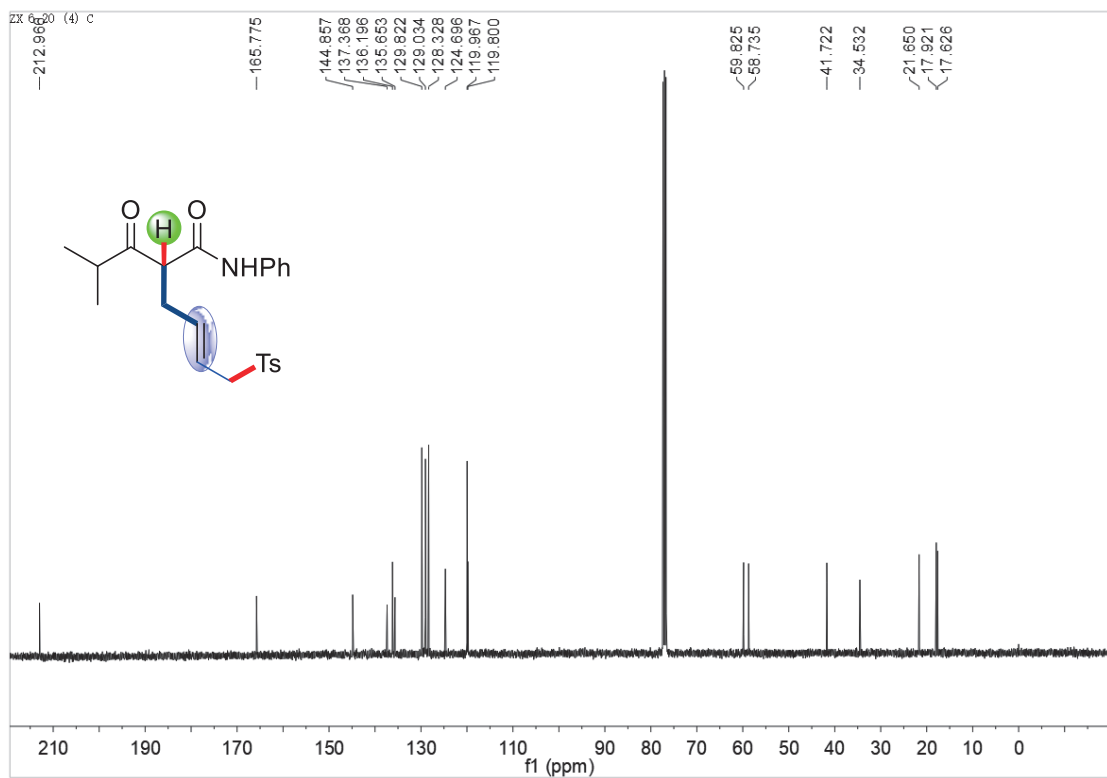

### 4a2, DEPT 90 and DEPT 135

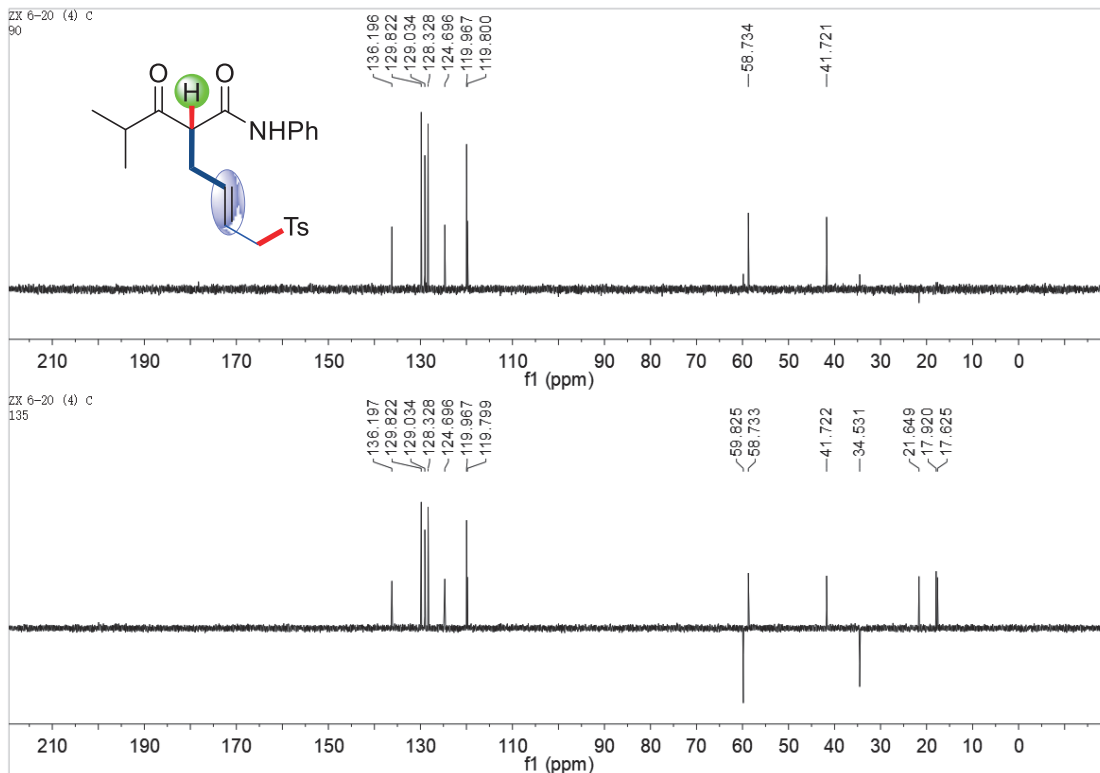

### 4a3, <sup>1</sup>H NMR

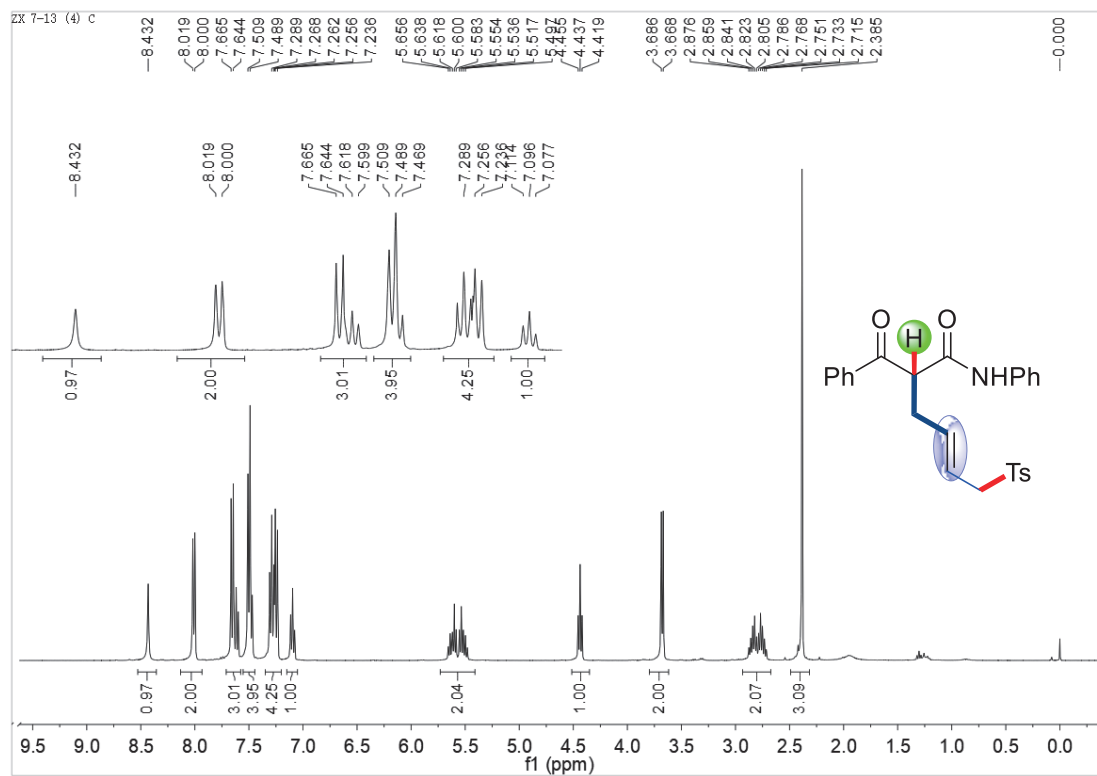

### 4a3, <sup>13</sup>C NMR

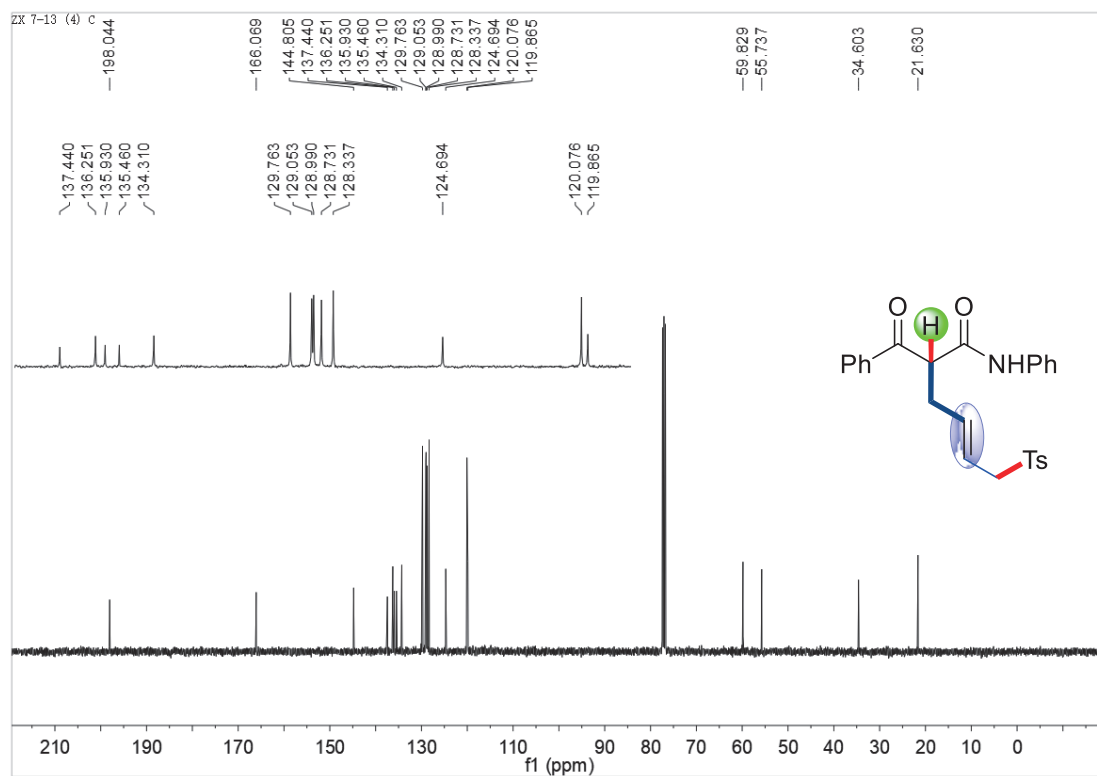

### 4a3, DEPT 90 and DEPT 135

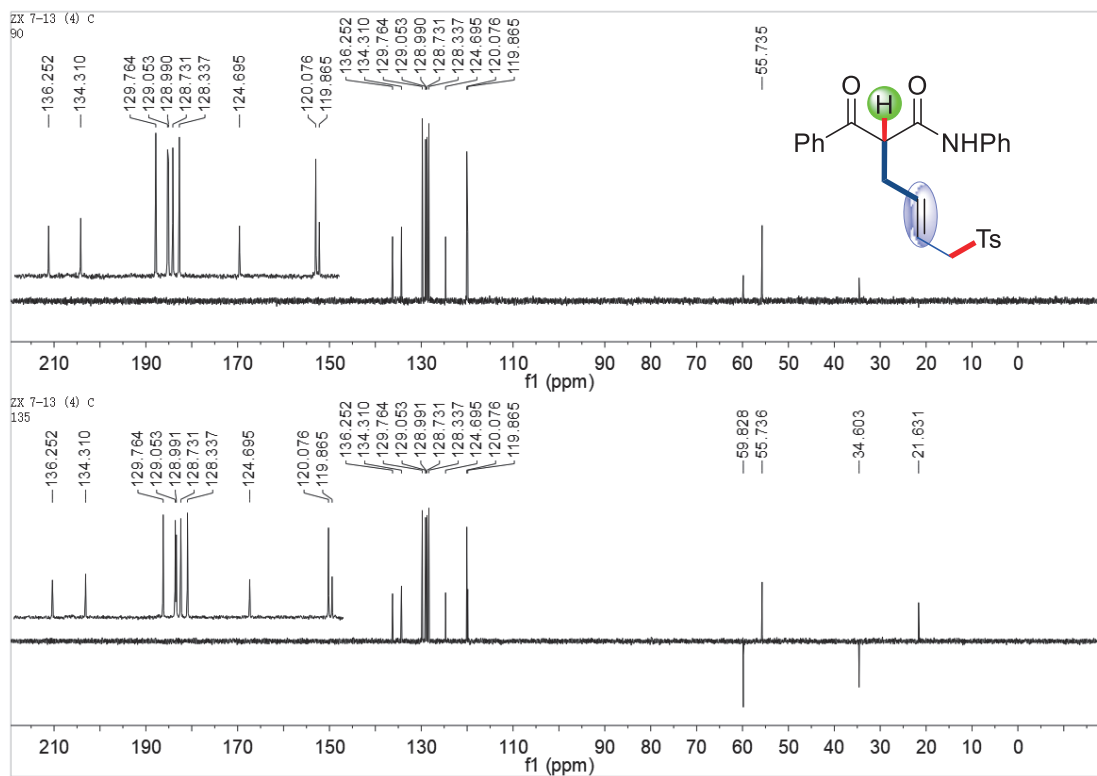

### 4a4, <sup>1</sup>H NMR

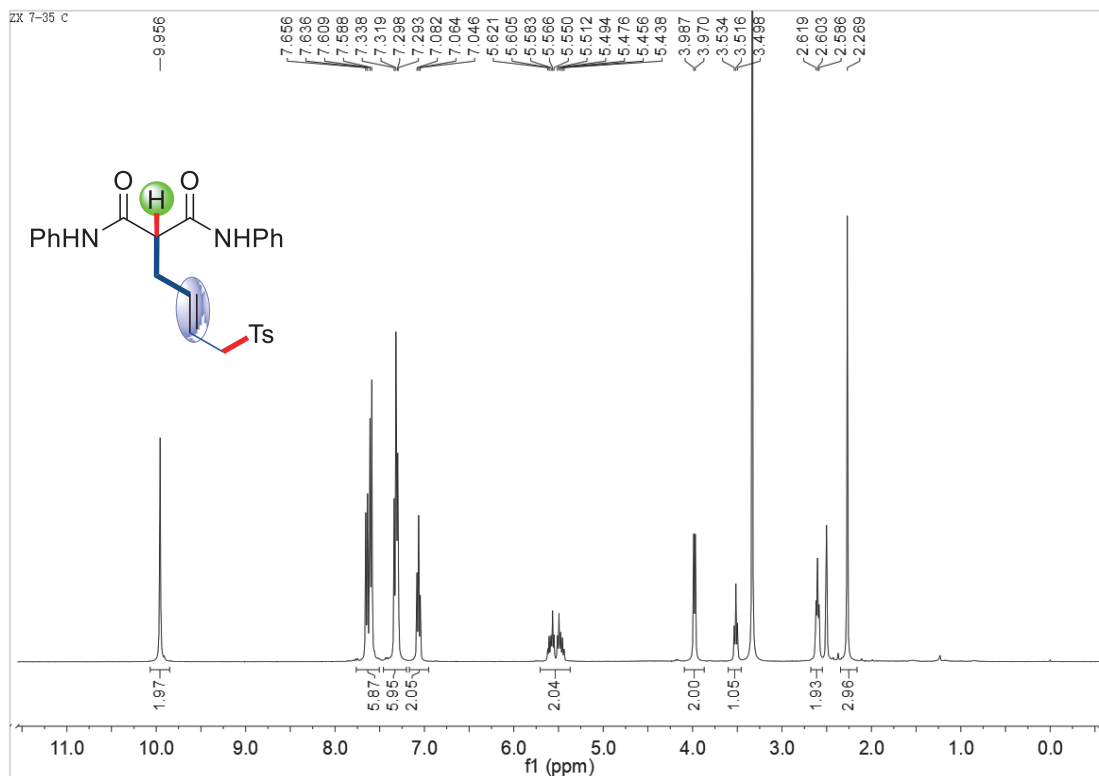

### 4a4, <sup>13</sup>C NMR

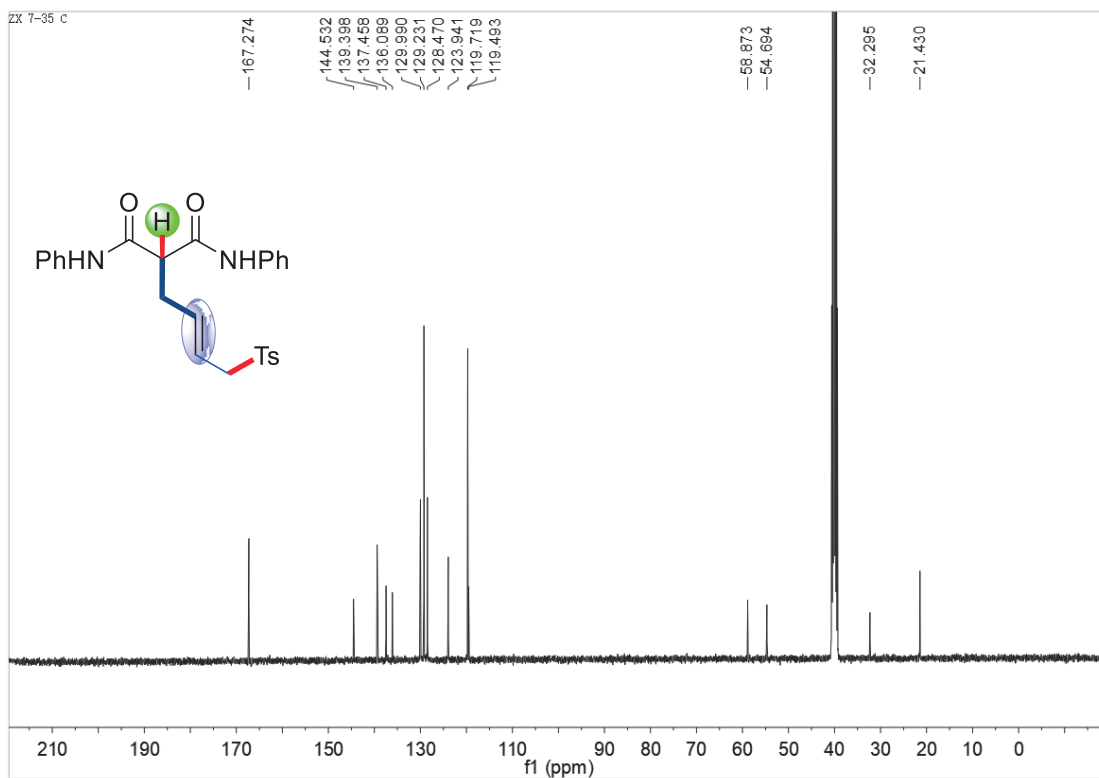

### 4a4, DEPT 90 and DEPT 135

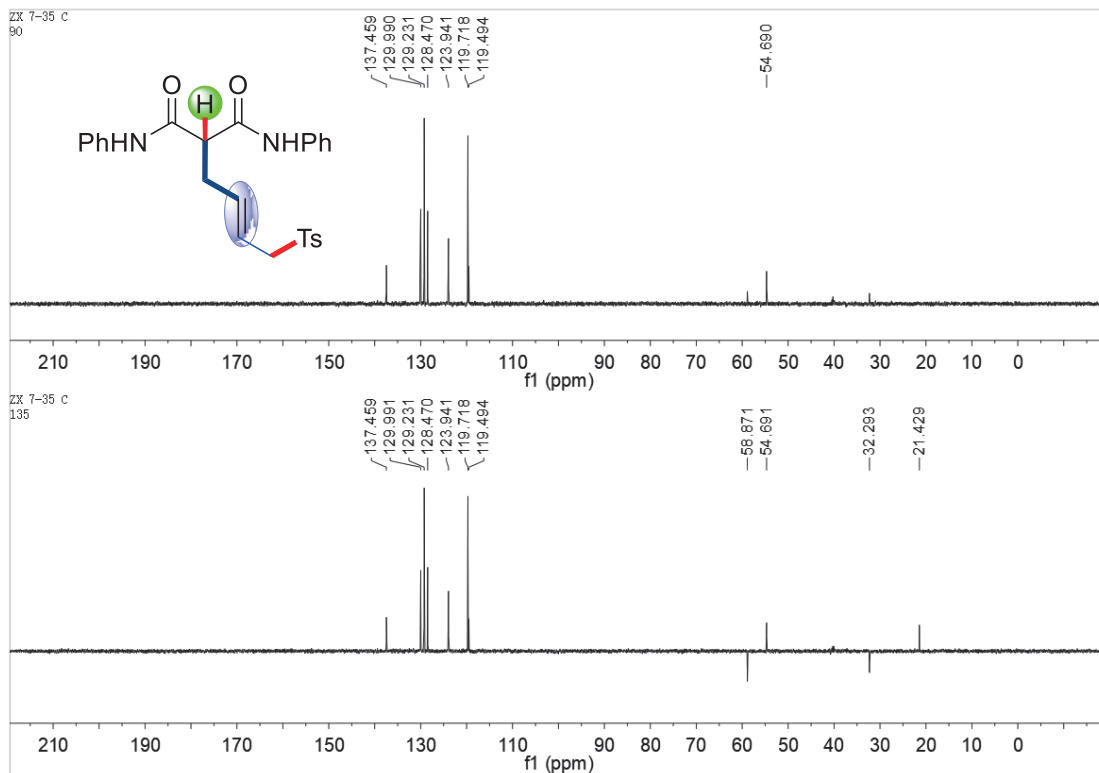

### 4a5, <sup>1</sup>H NMR

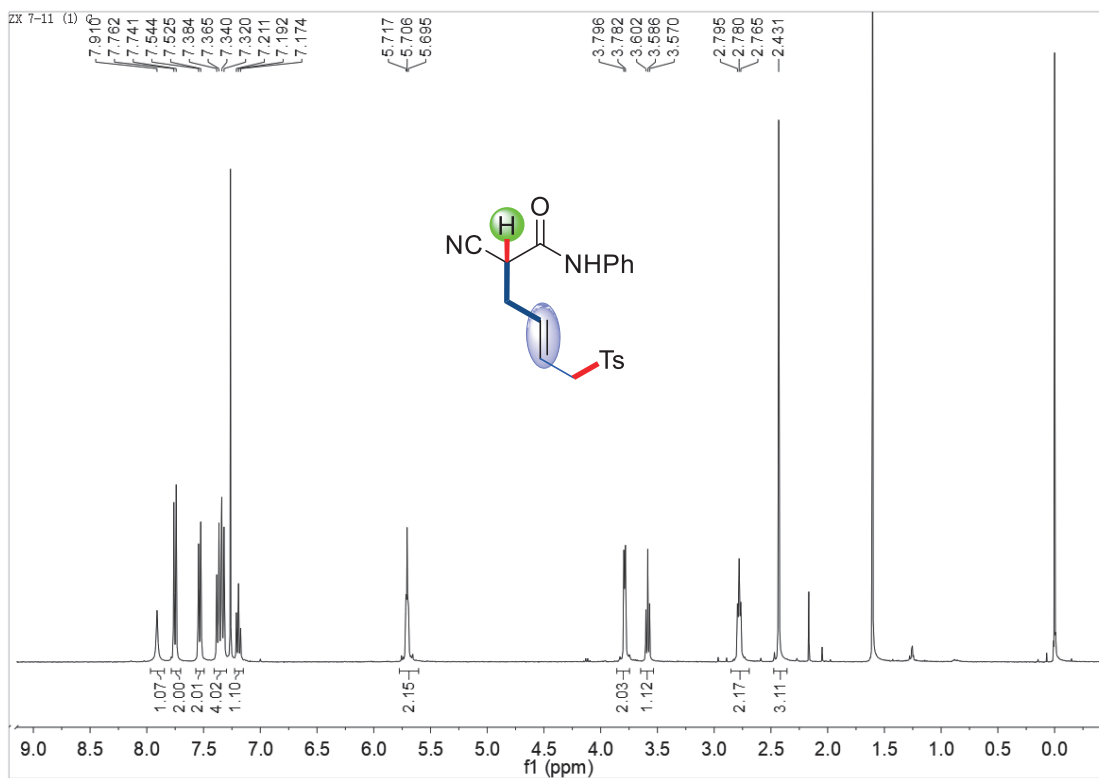

### 4a5, <sup>13</sup>C NMR

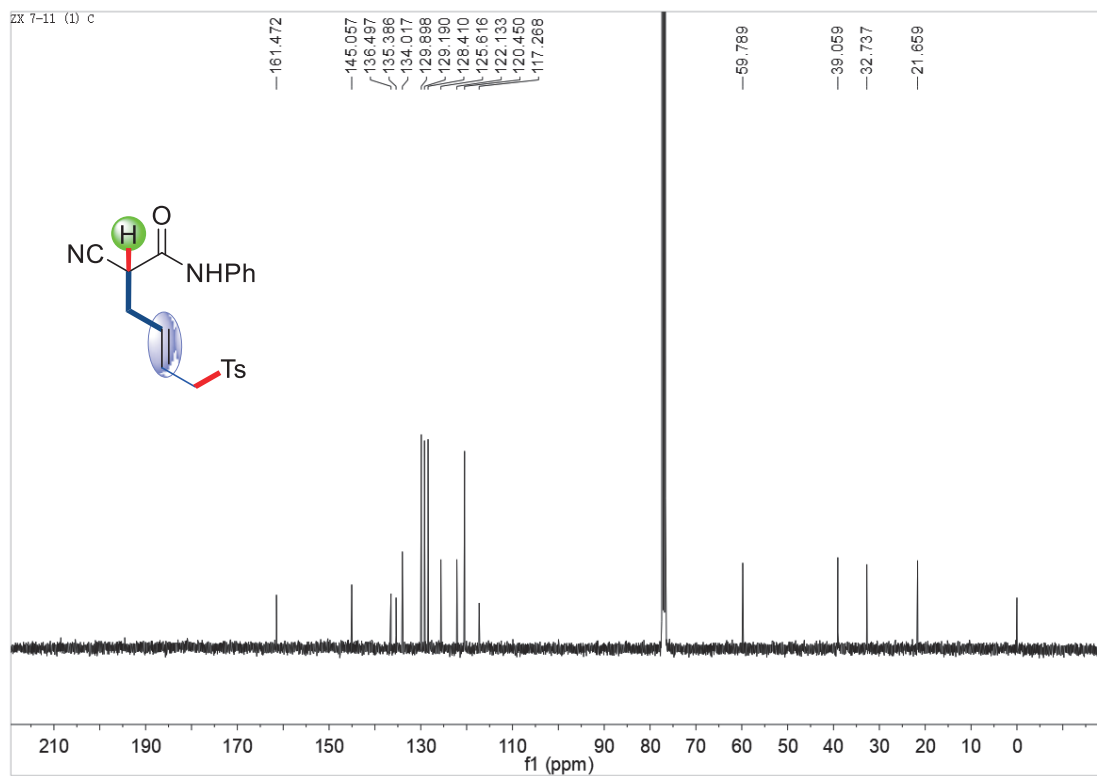

### 4a5, DEPT 90 and DEPT 135

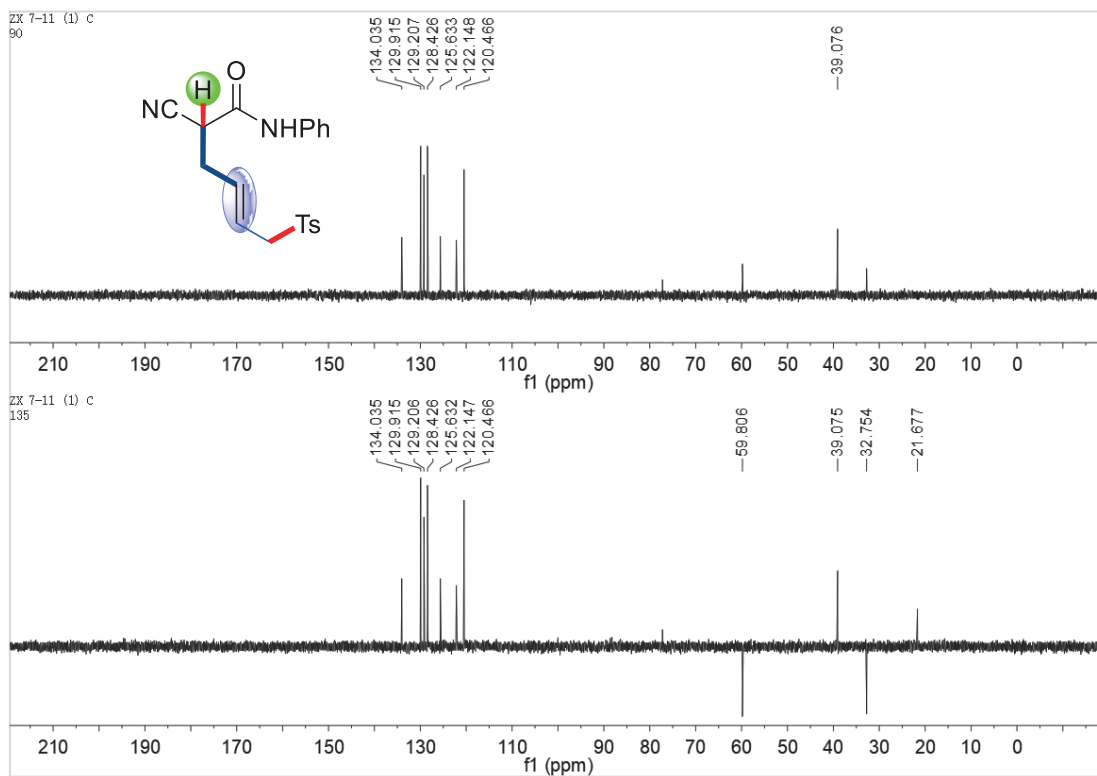



### 4b, <sup>1</sup>H NMR

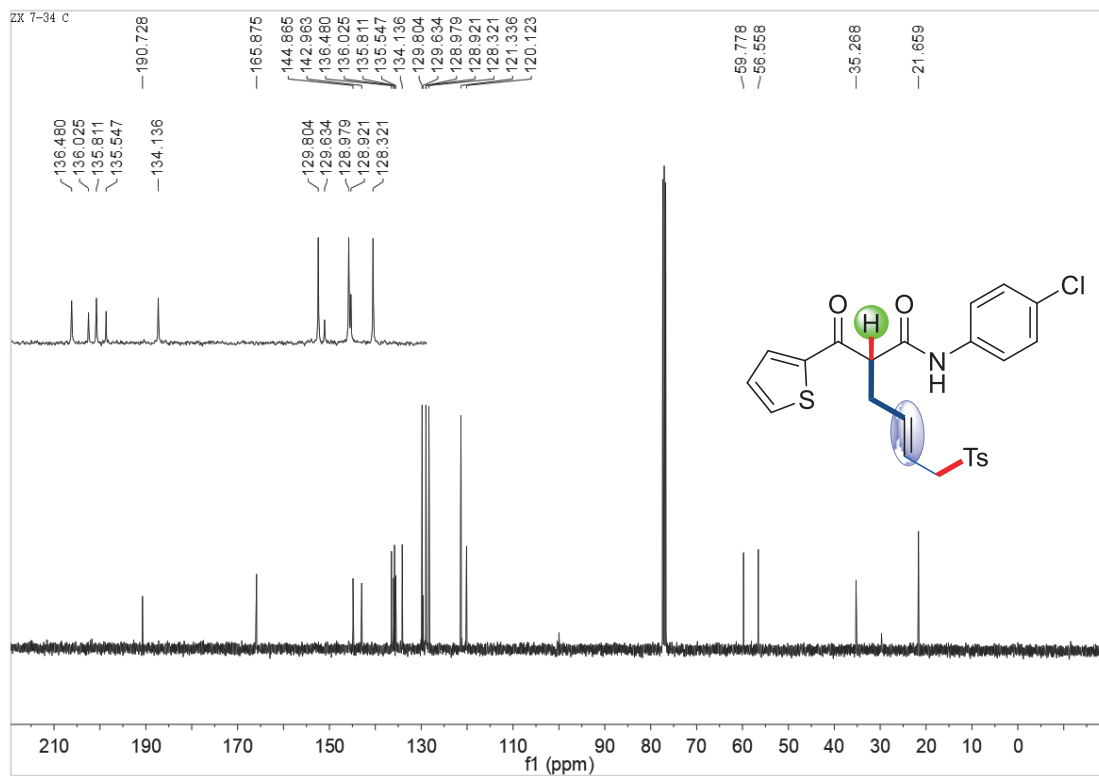

### 4b, <sup>13</sup>C NMR

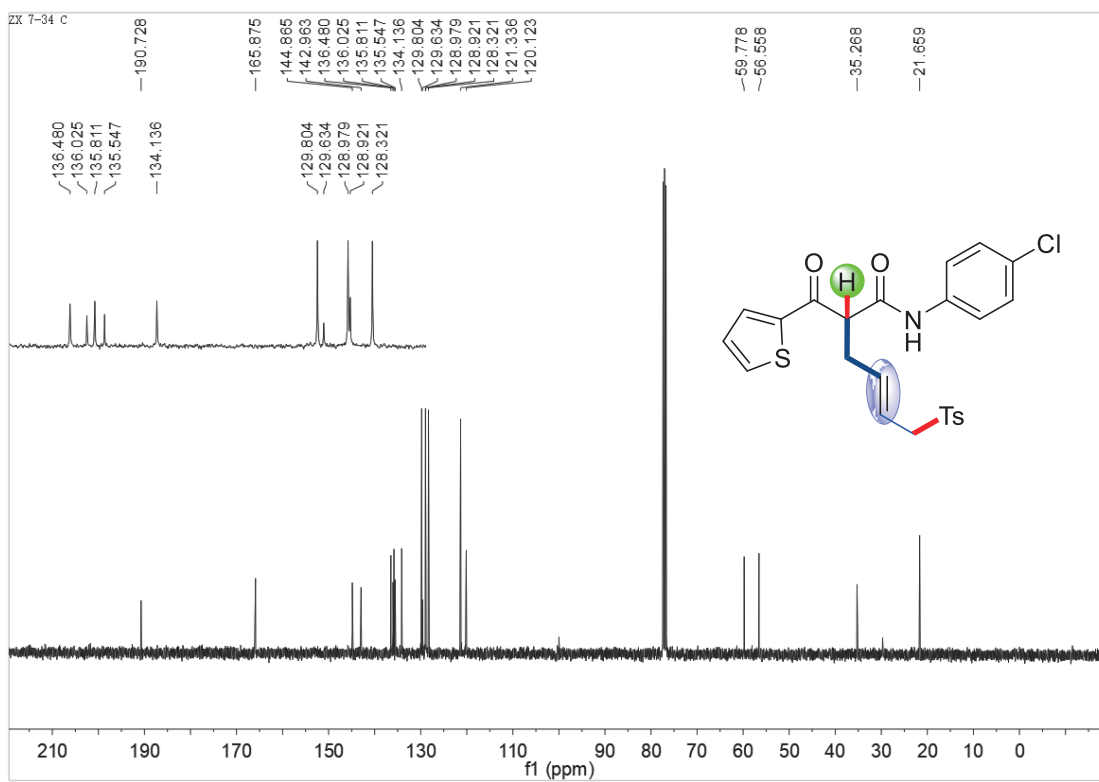

**4b**, DEPT 90 and DEPT 135

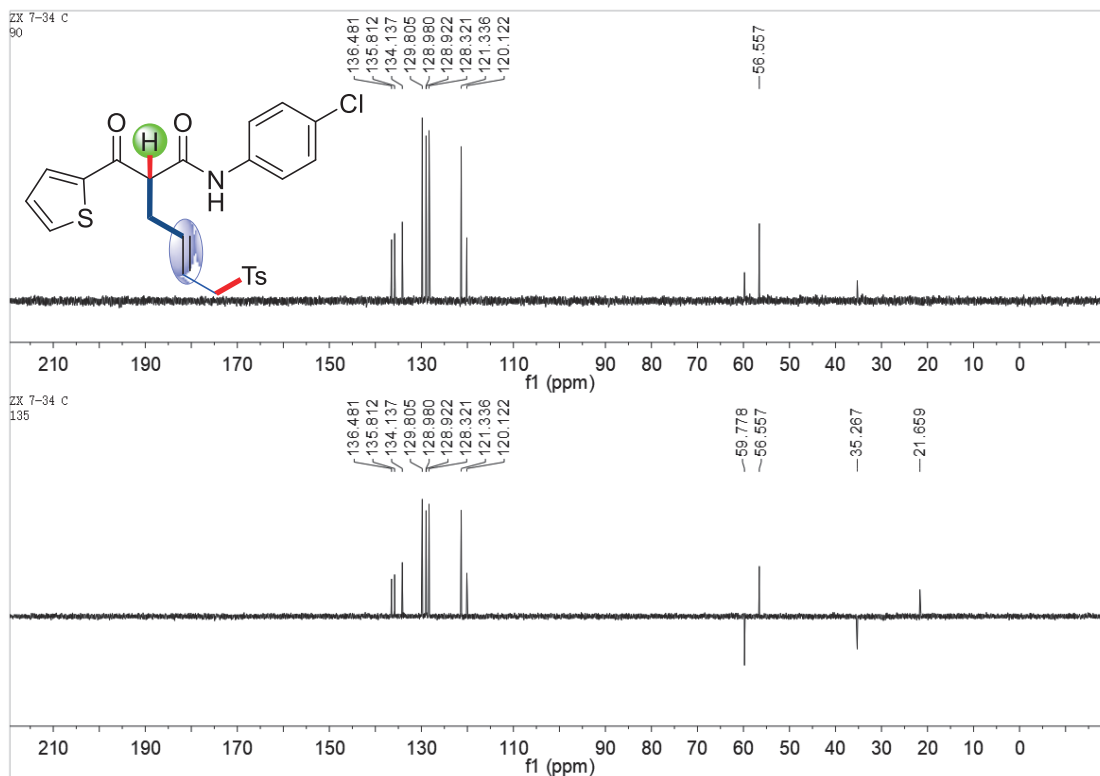

**4c1**, <sup>1</sup>H NMR

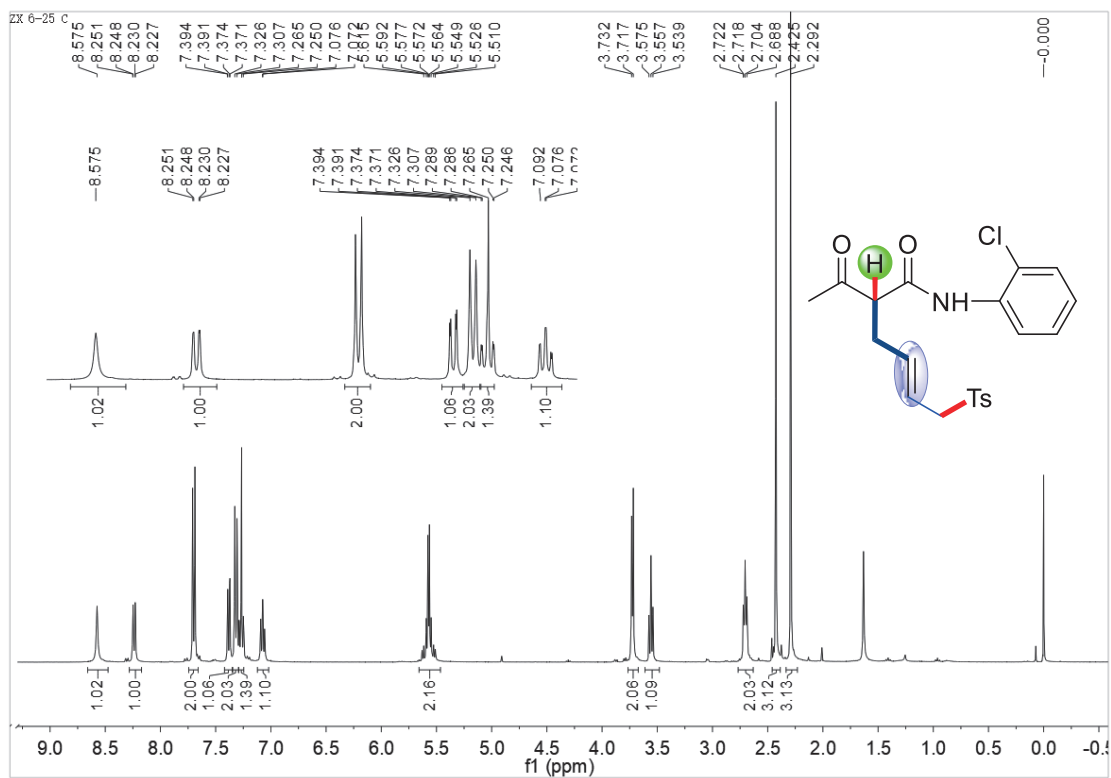

### 4c1, $^{13}\text{C}$ NMR

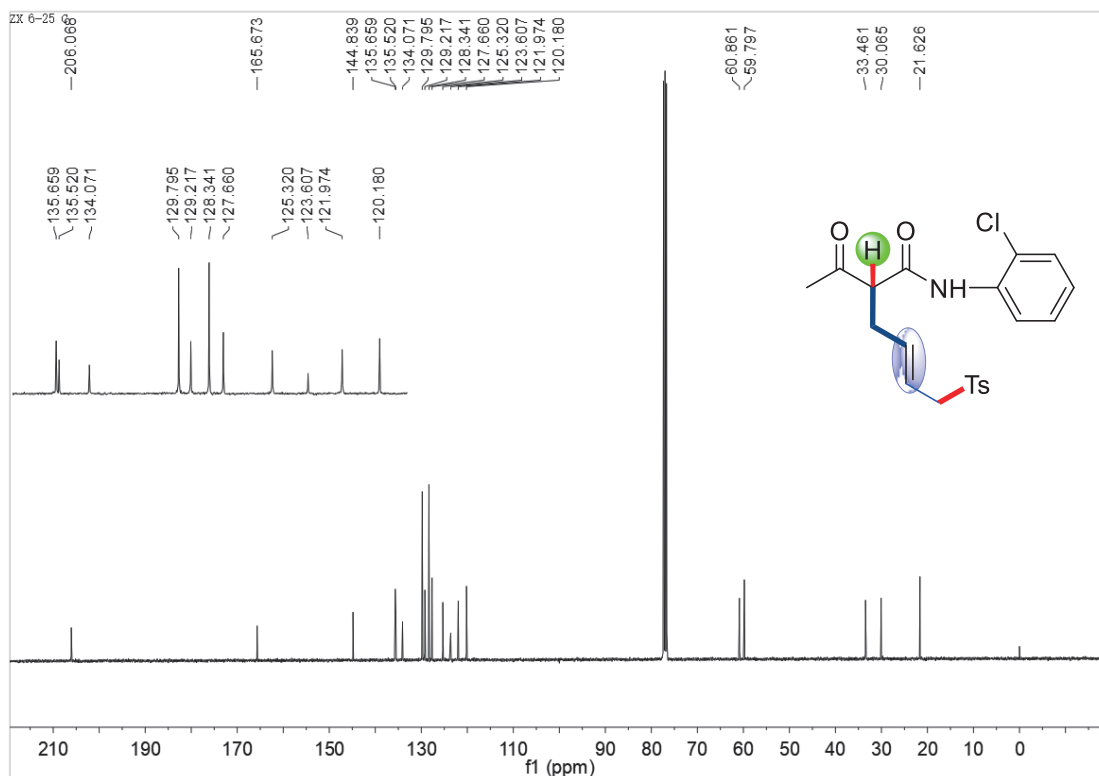

### 4c1, DEPT 90 and DEPT 135

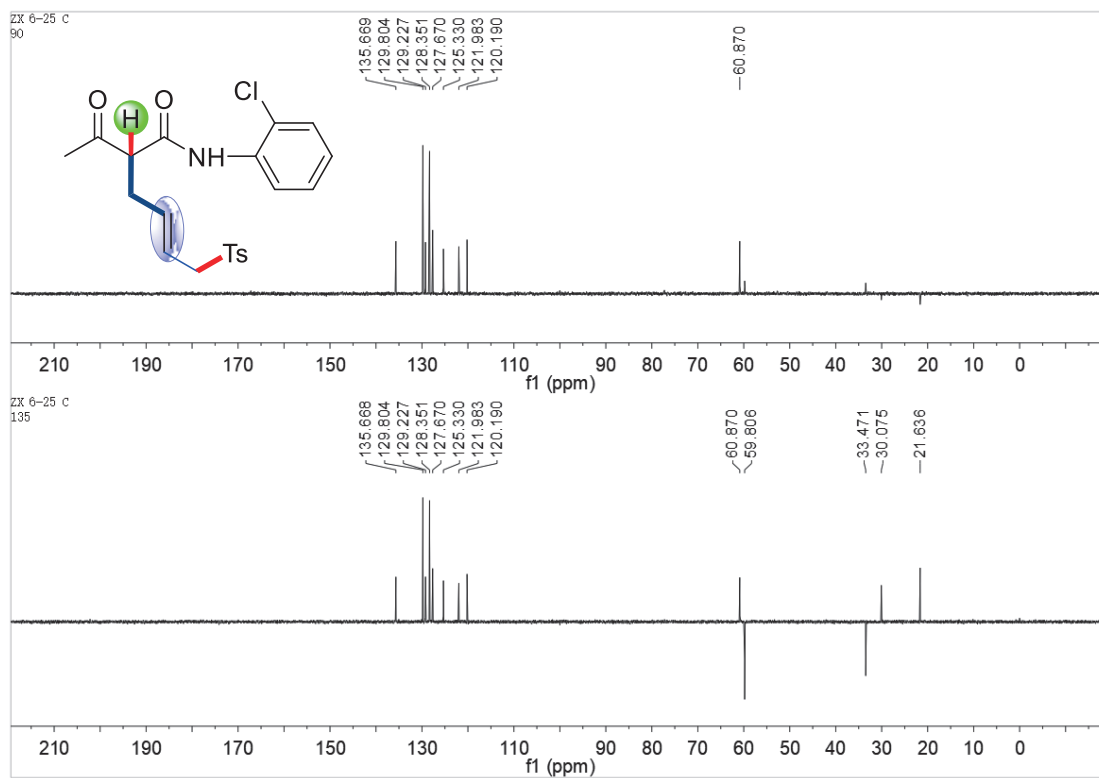

### 4c2, <sup>1</sup>H NMR

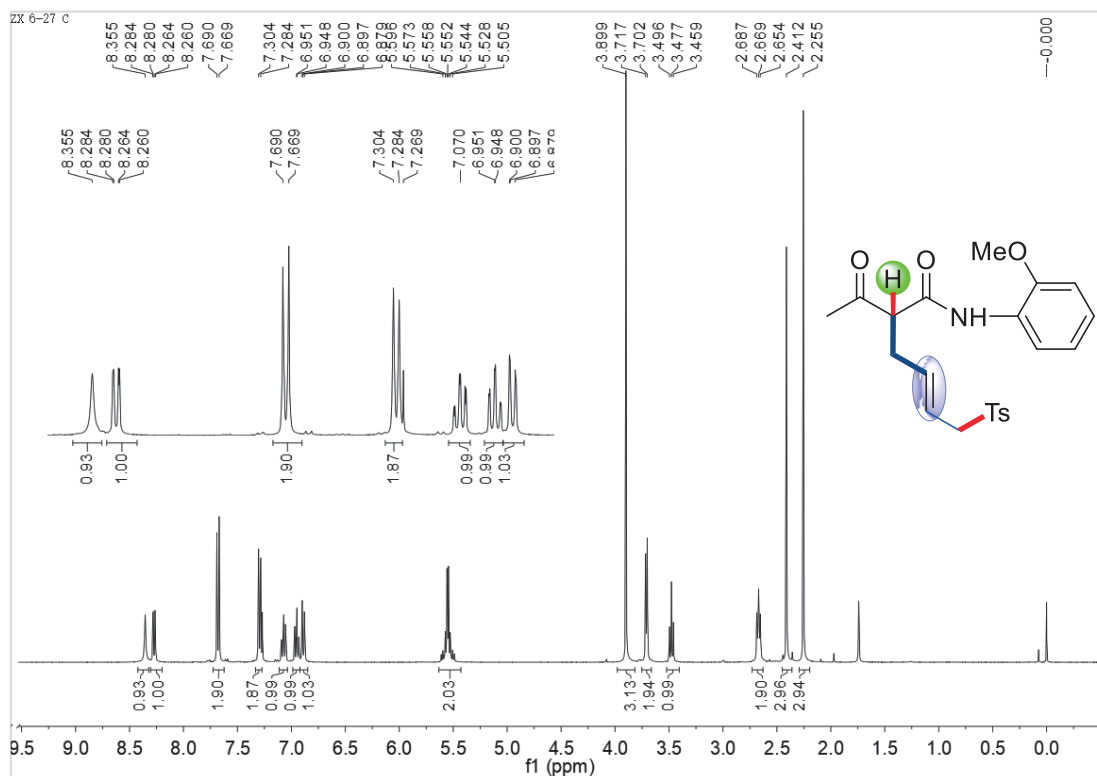

### 4c2, <sup>13</sup>C NMR

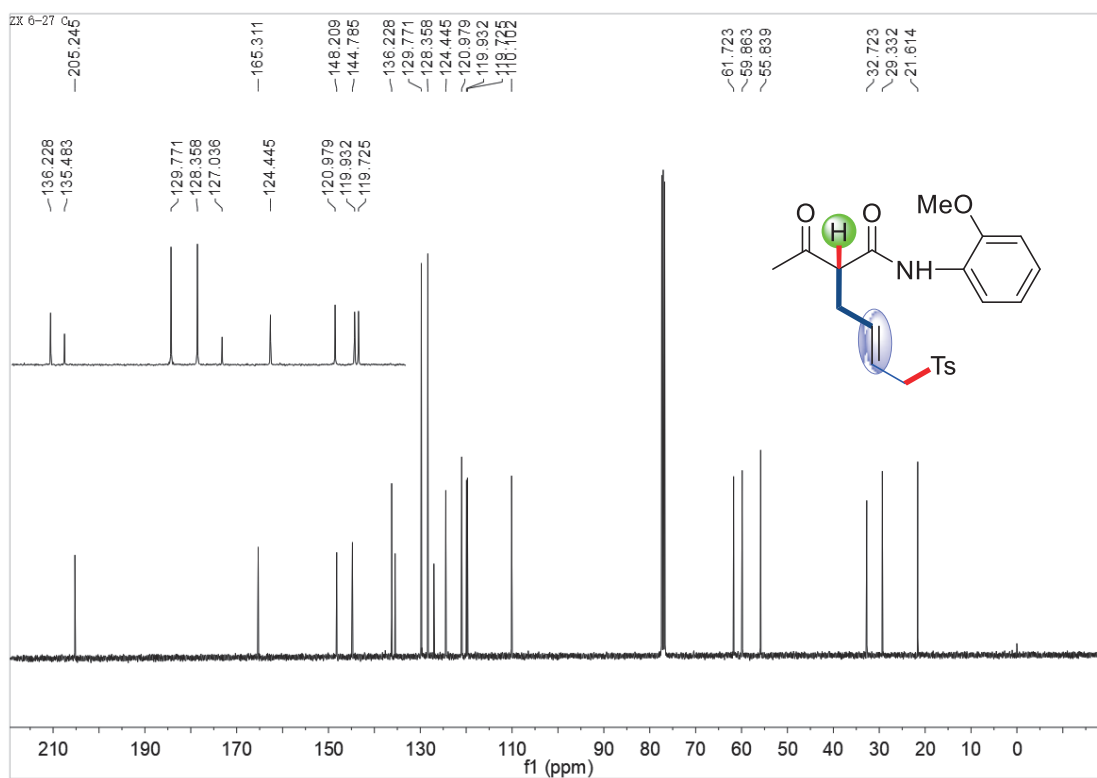

### 4c2, DEPT 90 and DEPT 135

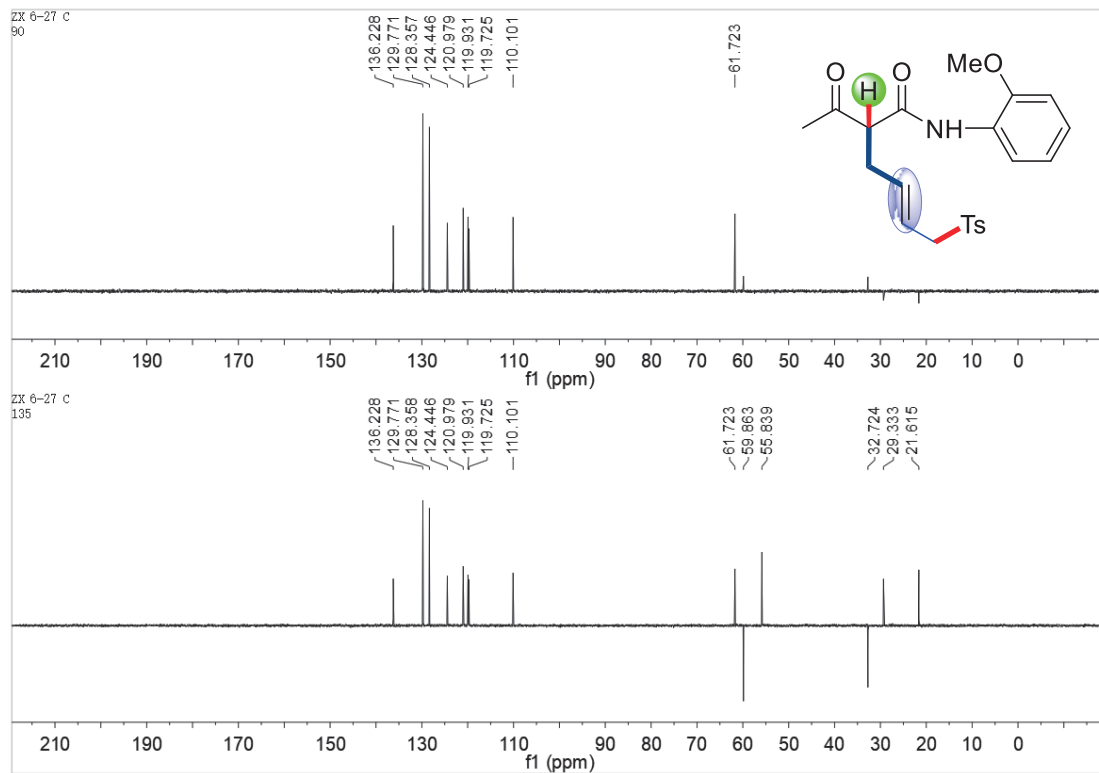

### 4c3, <sup>1</sup>H NMR

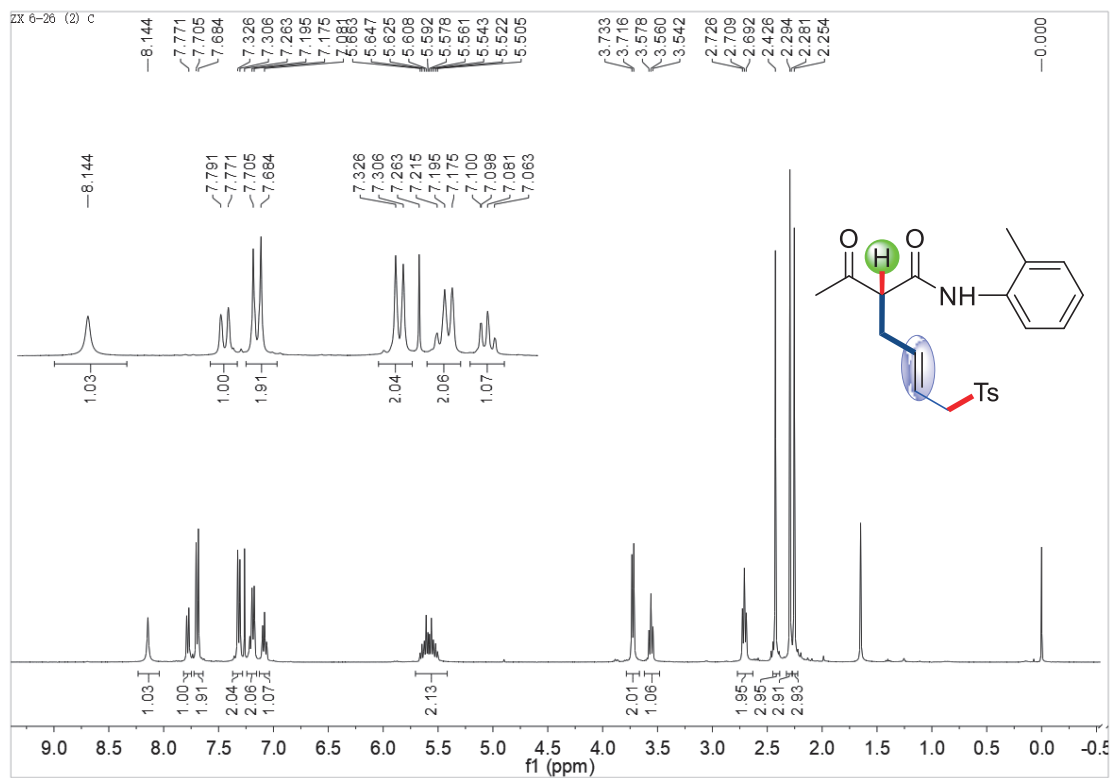

### 4c3, <sup>13</sup>C NMR

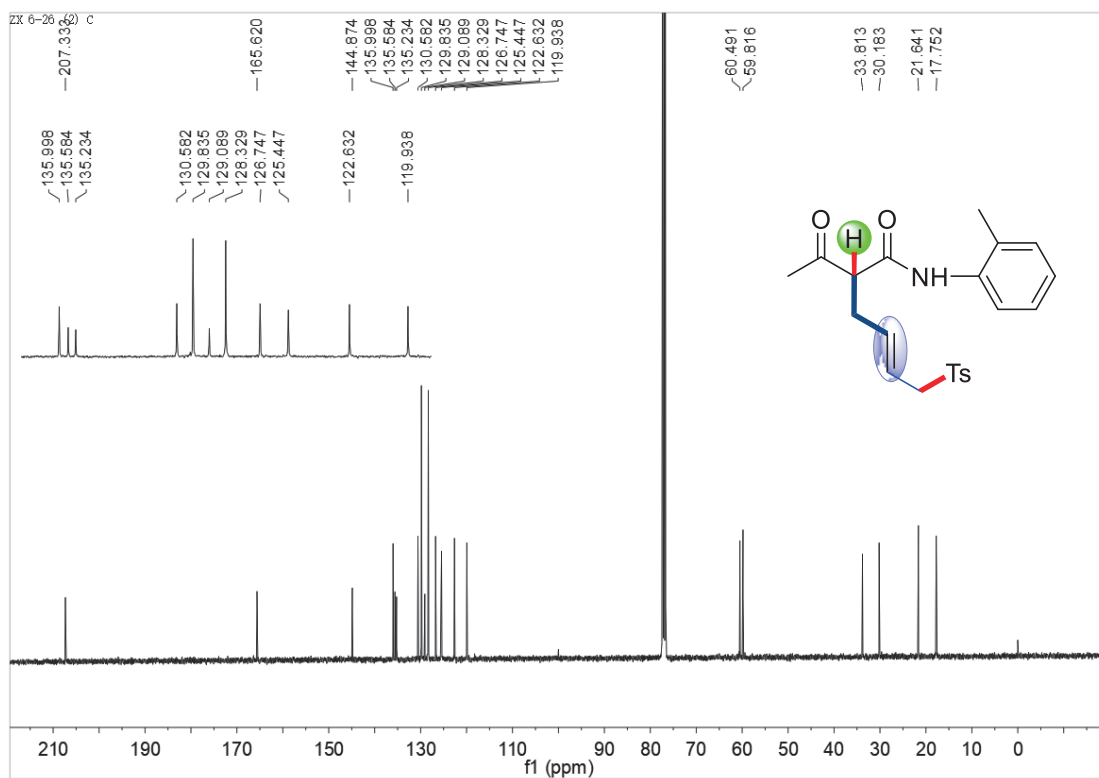

### 4c3, DEPT 90 and DEPT 135

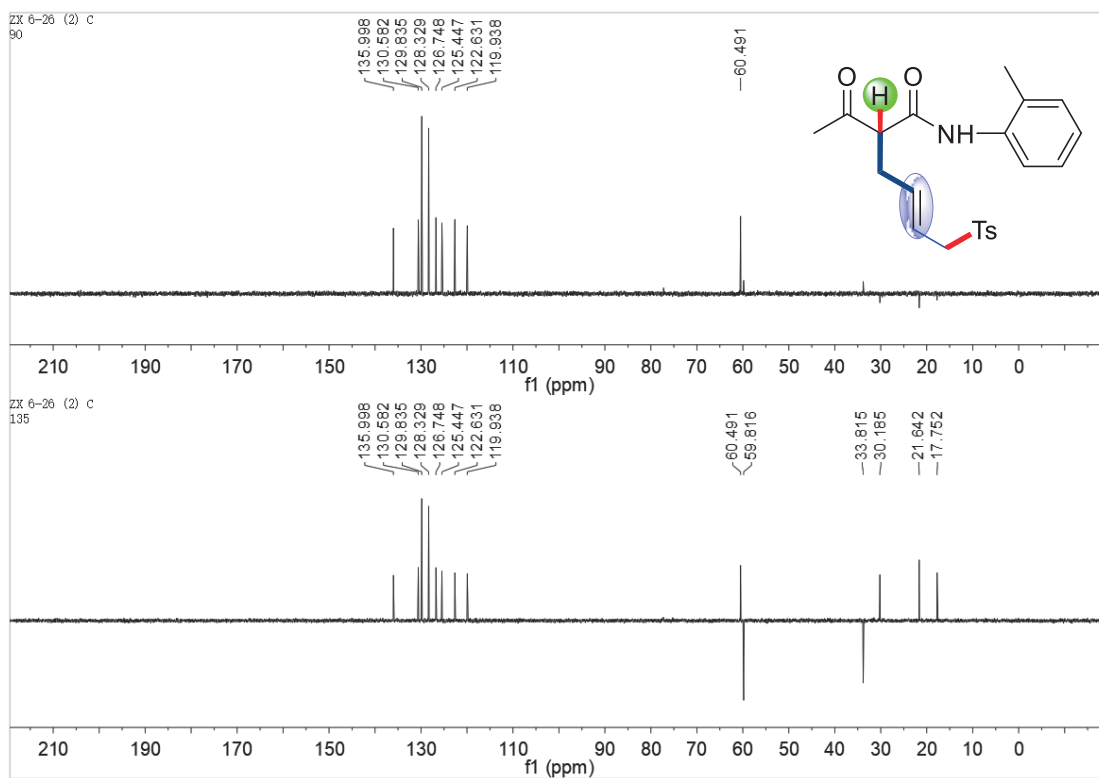

### 4d1, <sup>1</sup>H NMR

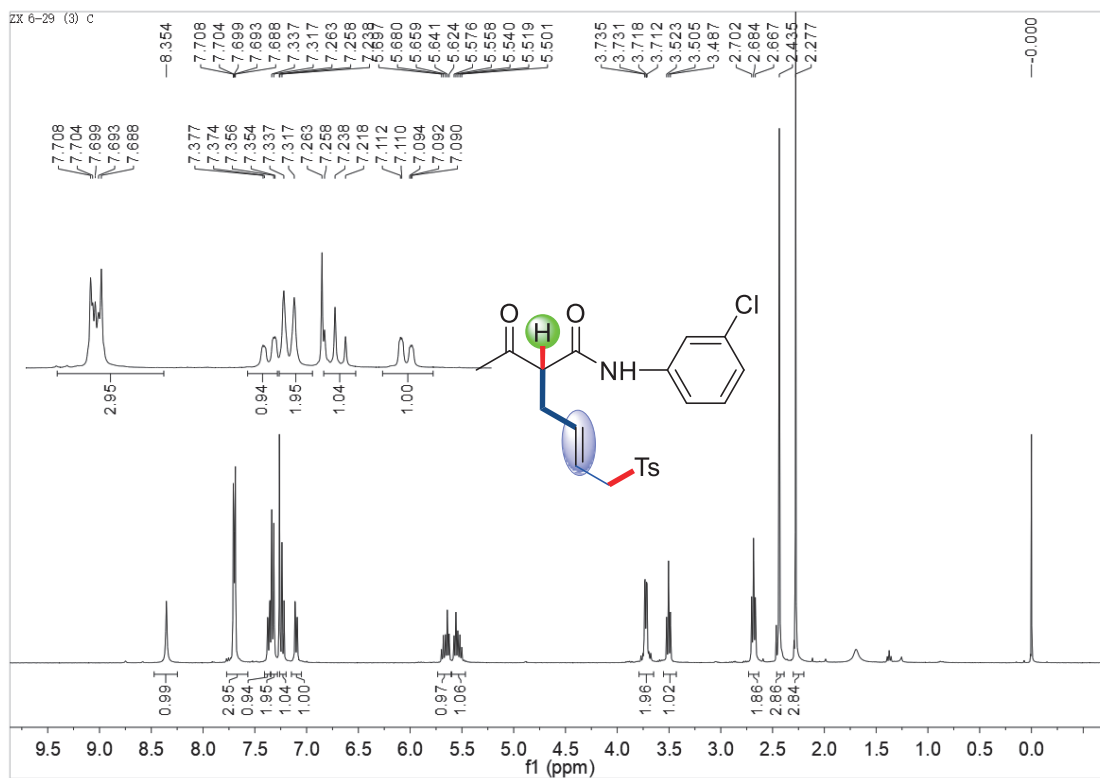

### 4d1, <sup>13</sup>C NMR

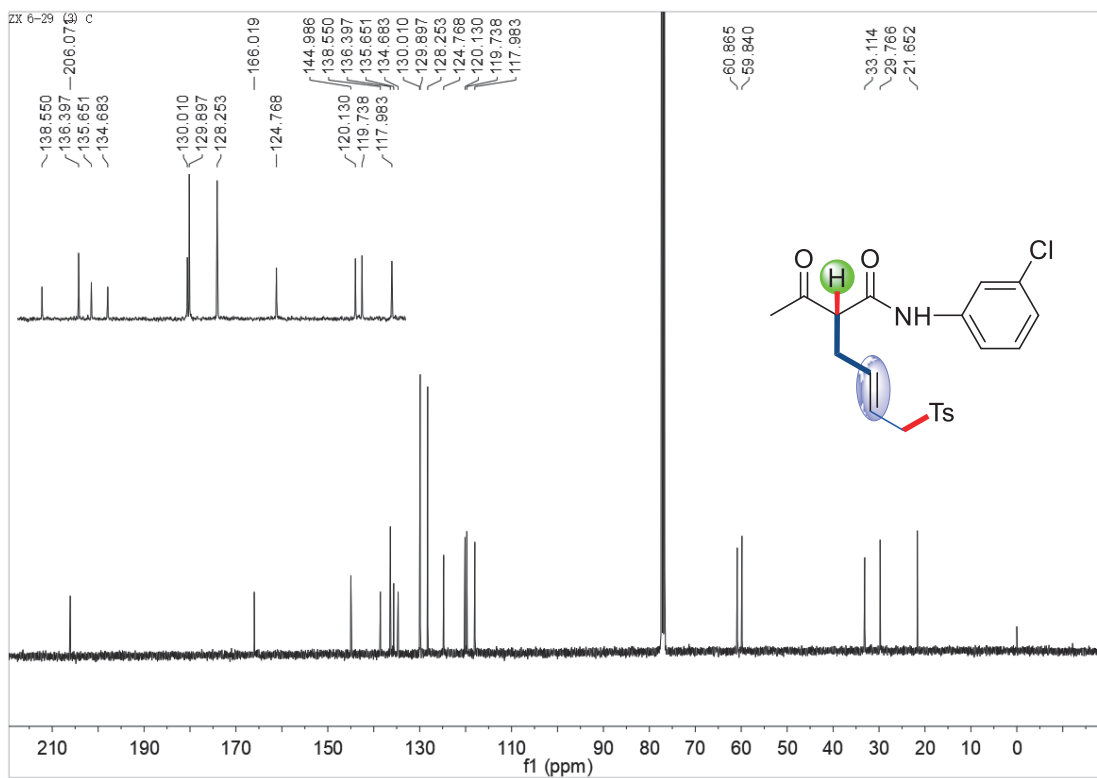

### 4d1, DEPT 90 and DEPT 135

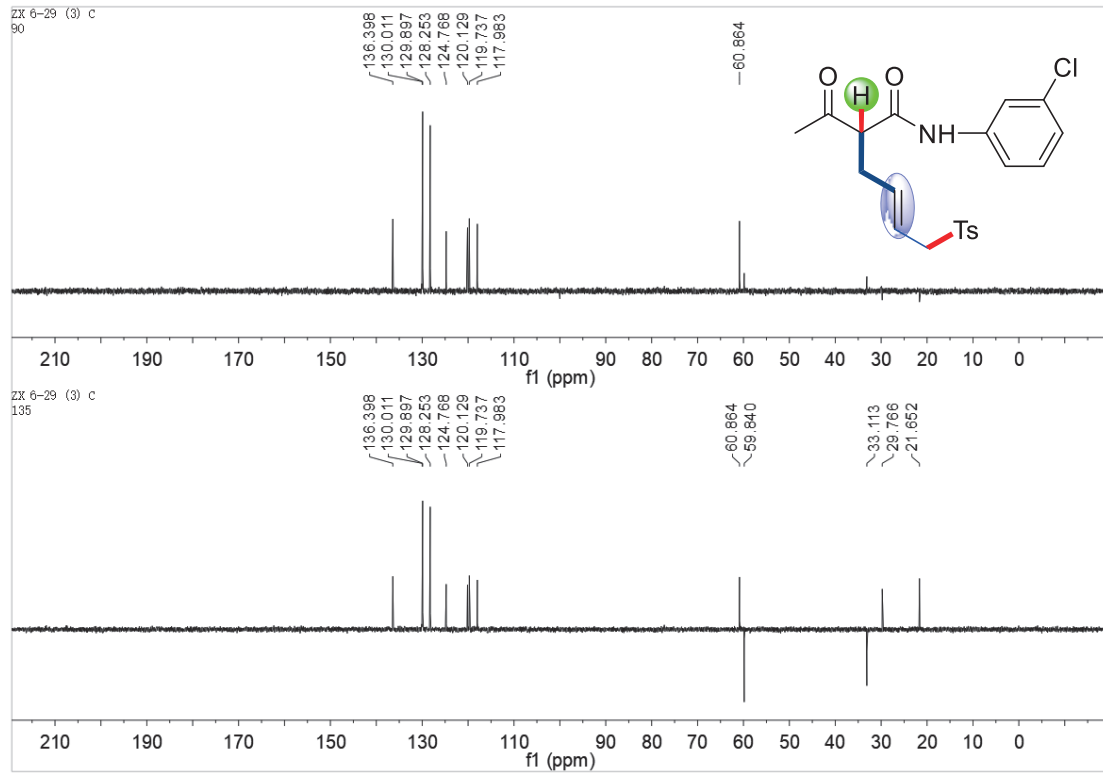

### 4d2, <sup>1</sup>H NMR

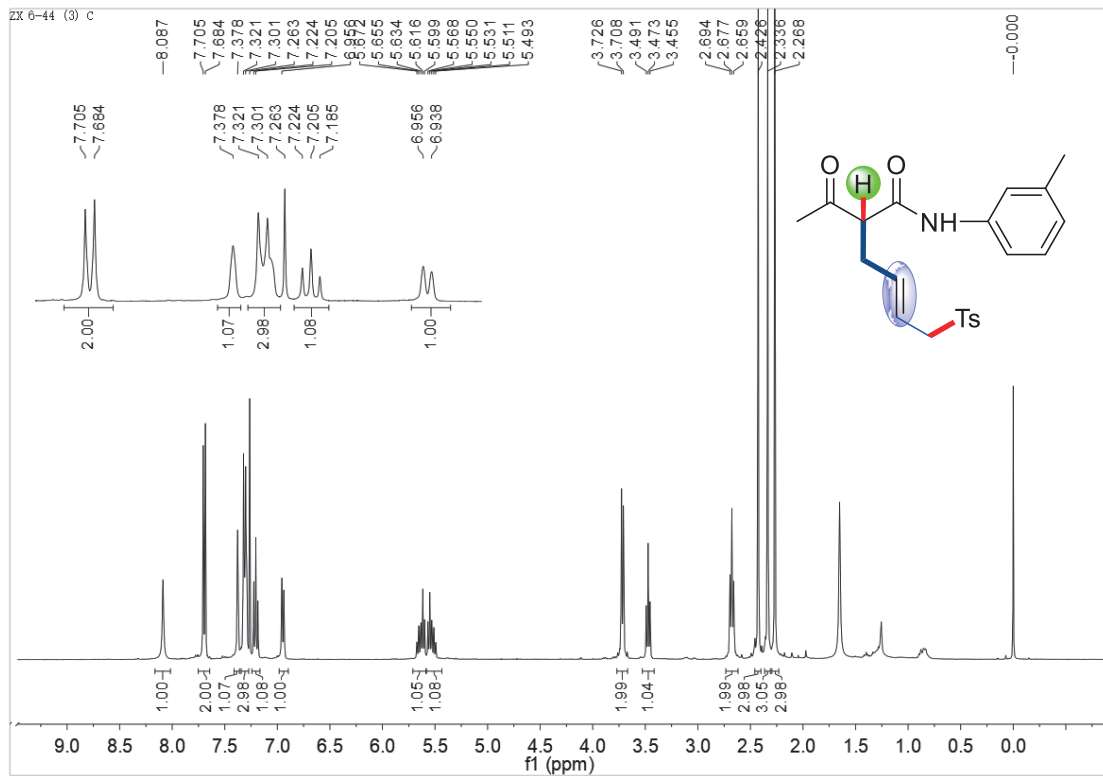



### 4d2, <sup>13</sup>C NMR

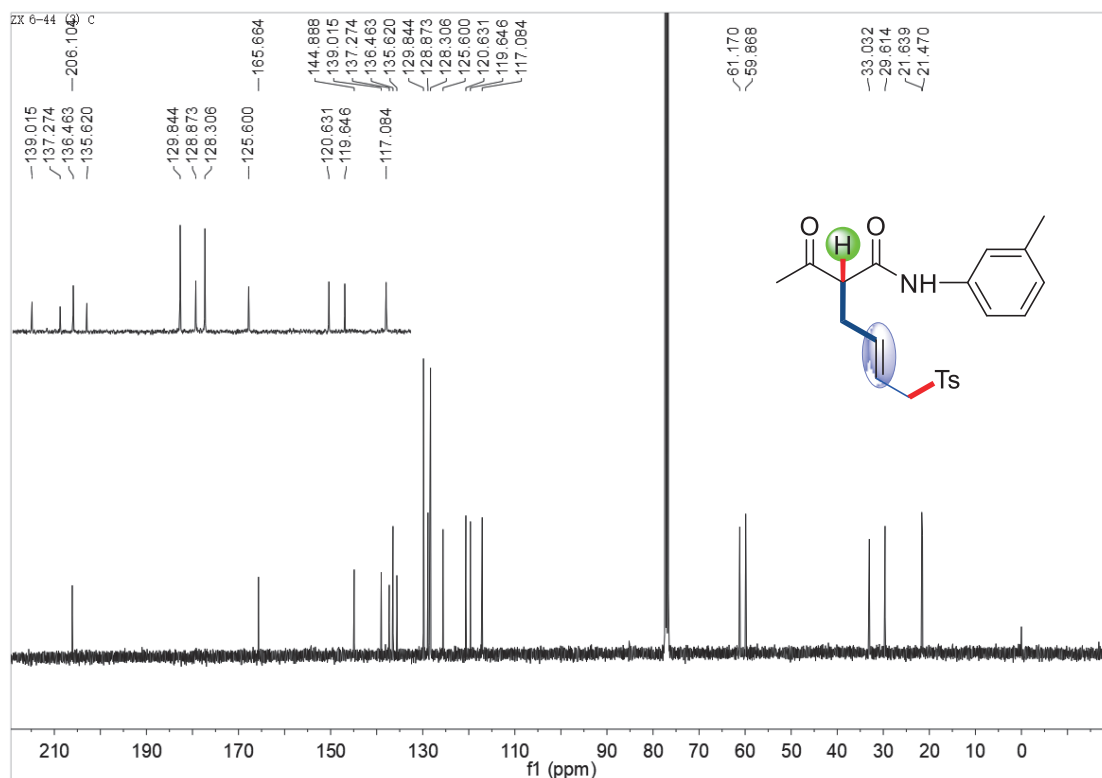

### 4d2, DEPT 90 and DEPT 135

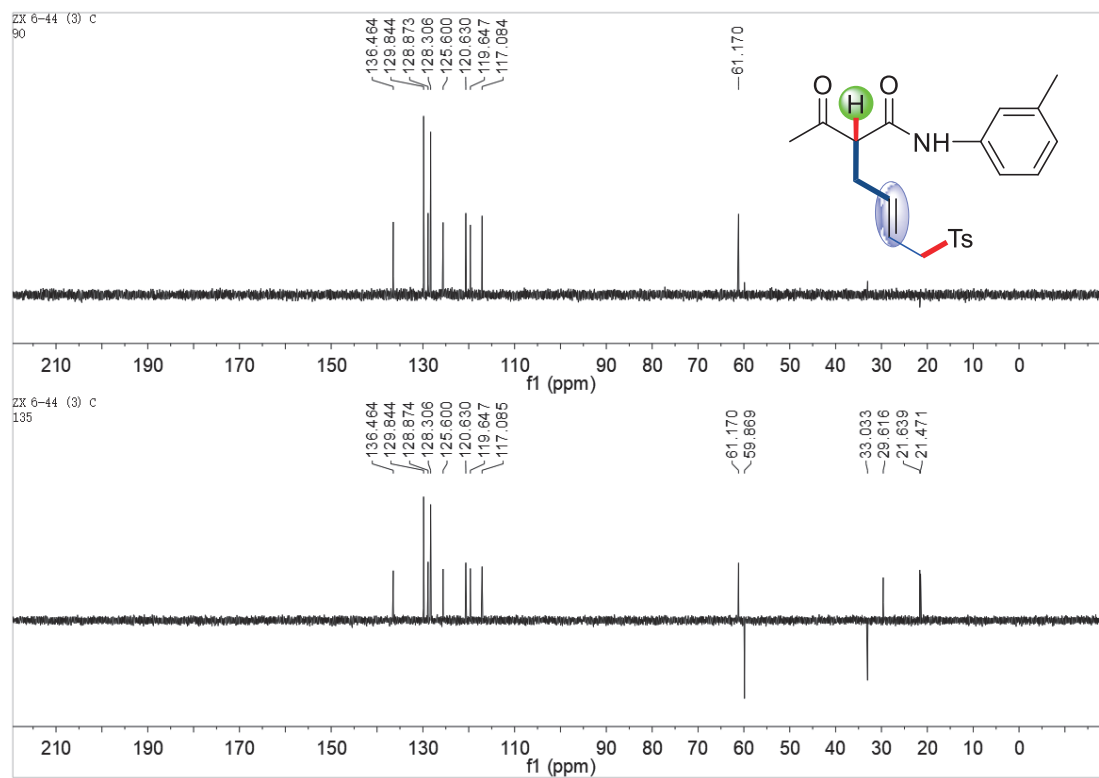

### 4e1, <sup>1</sup>H NMR

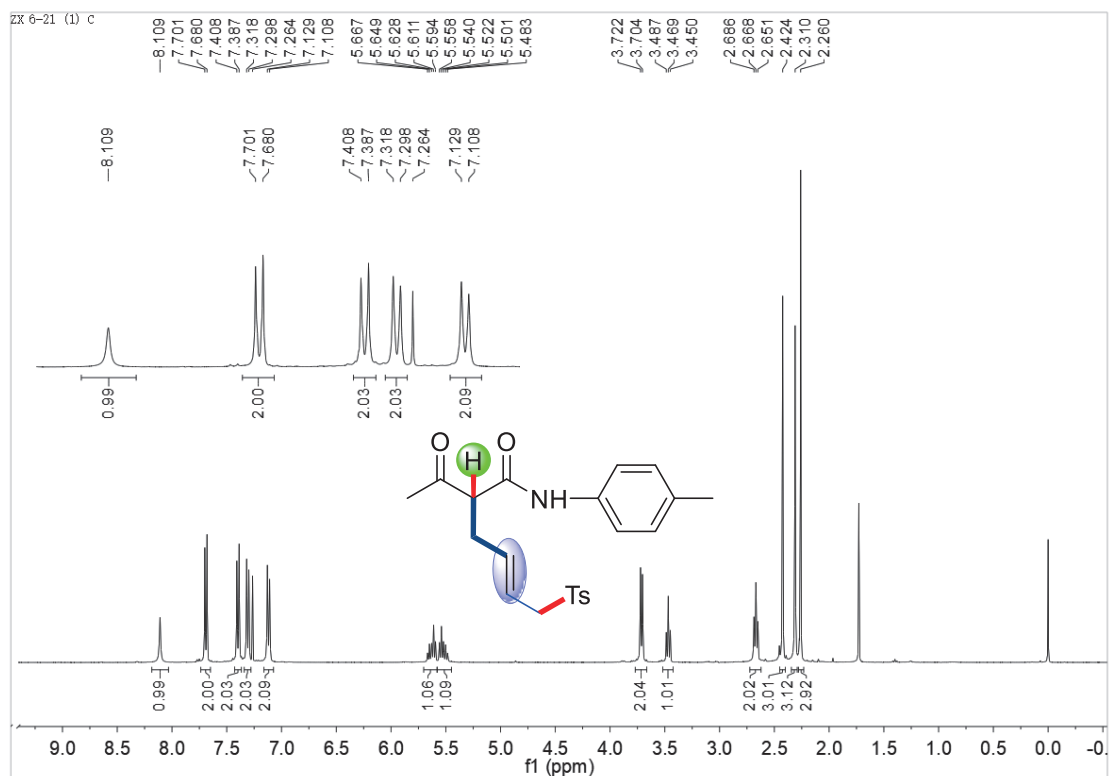

### 4e1, <sup>13</sup>C NMR

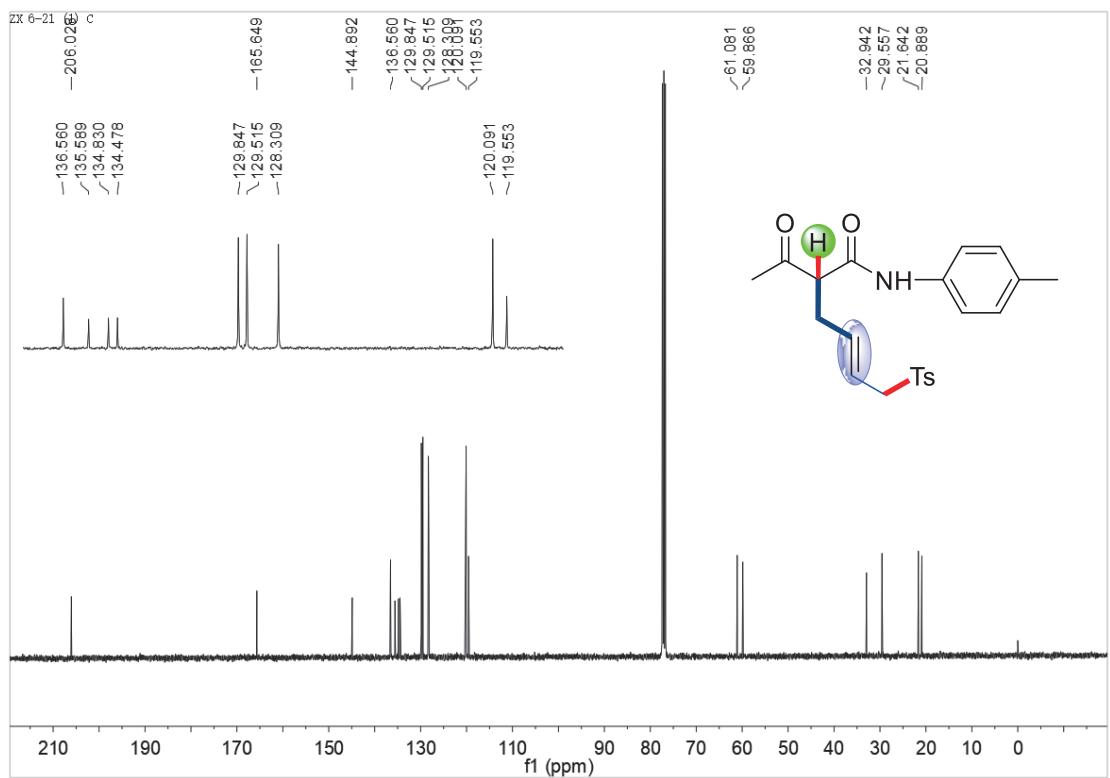



### 4e2, $^{13}\text{C}$ NMR

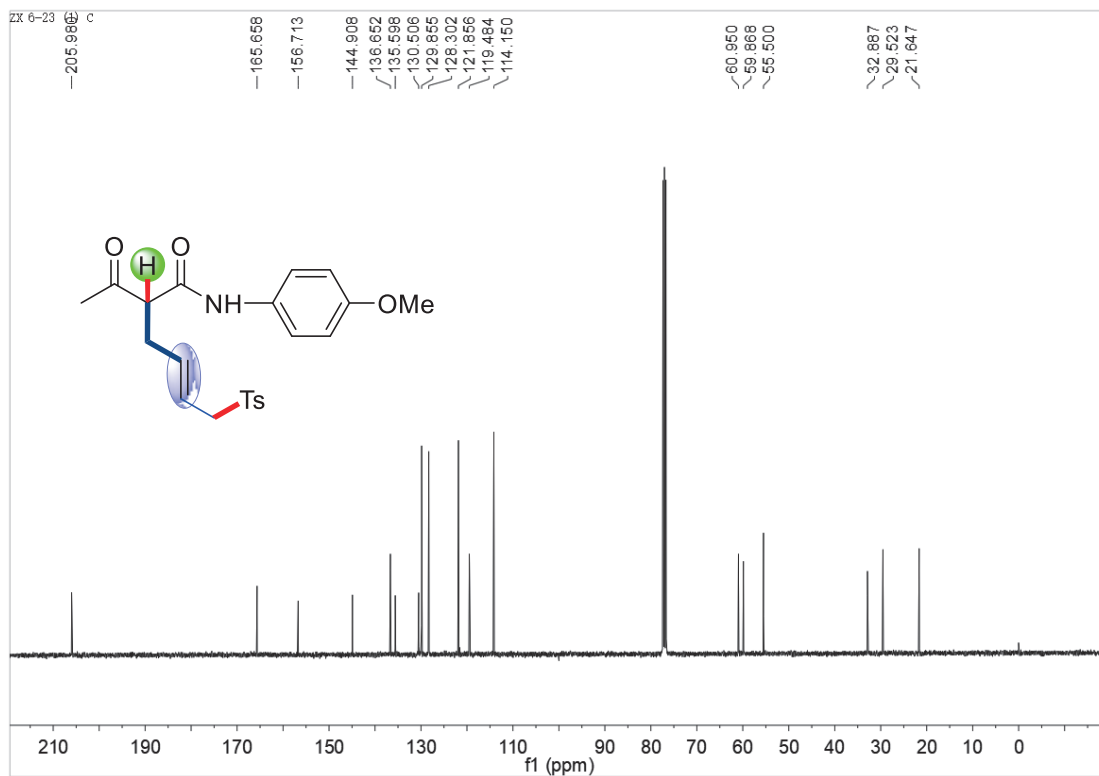

### 4e2, DEPT 90 and DEPT 135

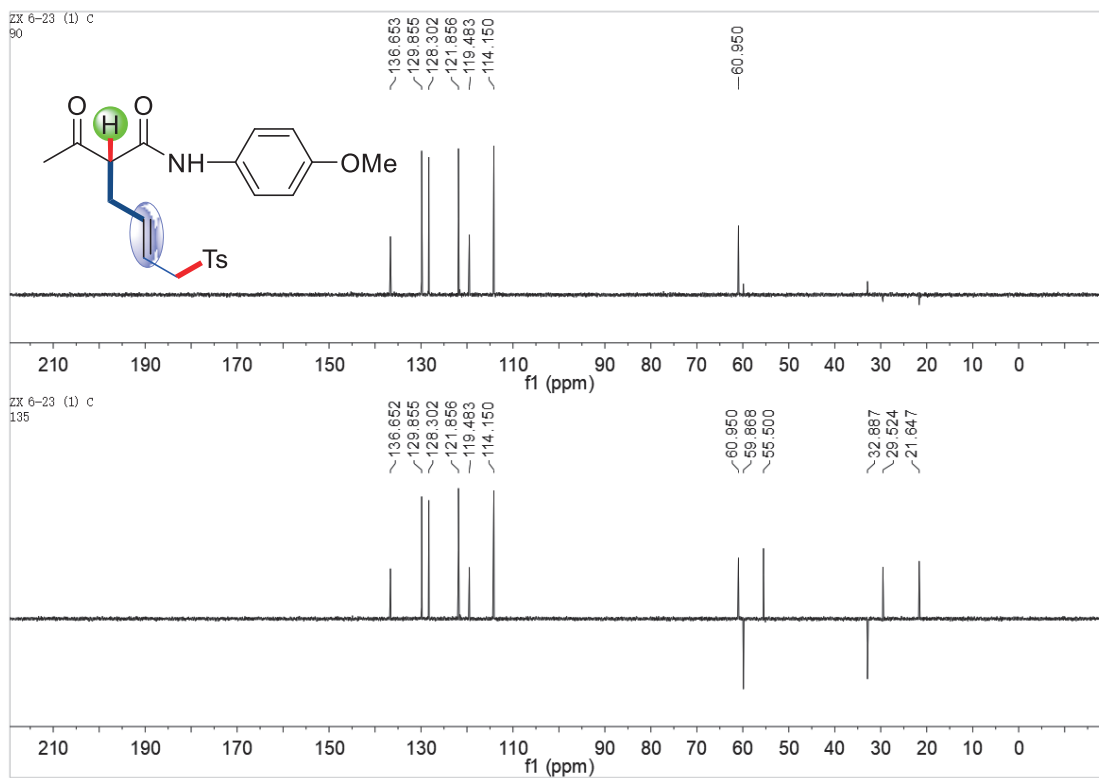

### 4e3, <sup>1</sup>H NMR

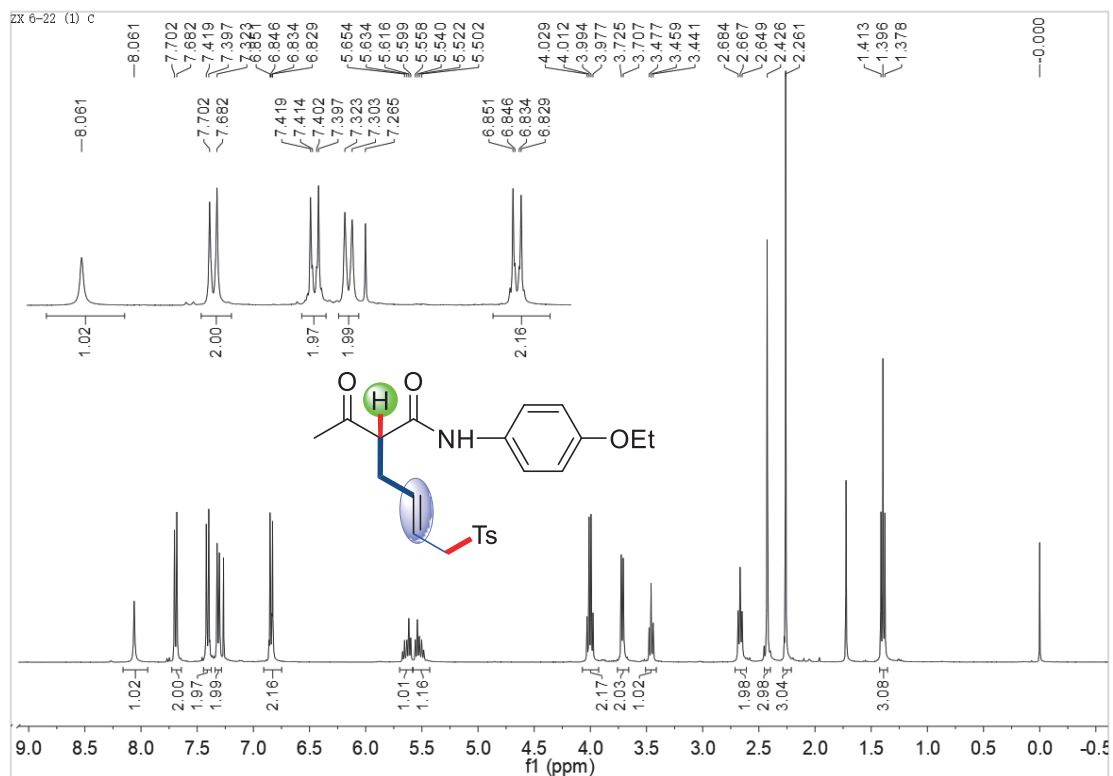

### 4e3, <sup>13</sup>C NMR

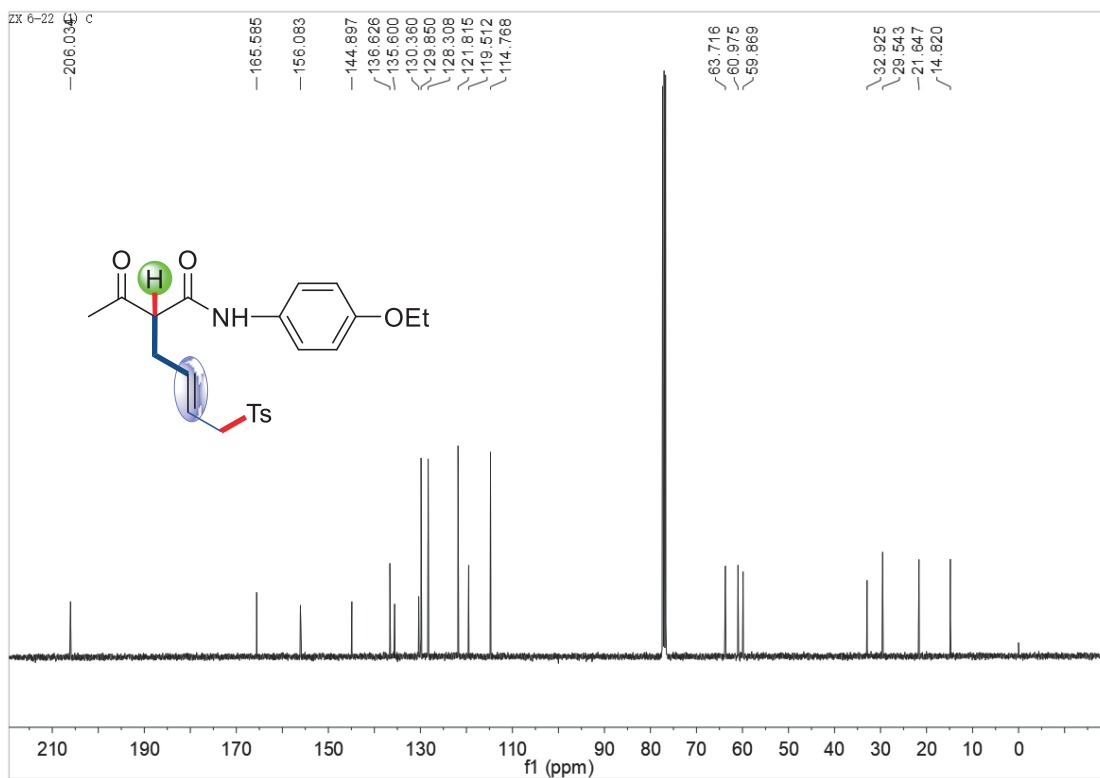

### 4e3, DEPT 90 and DEPT 135

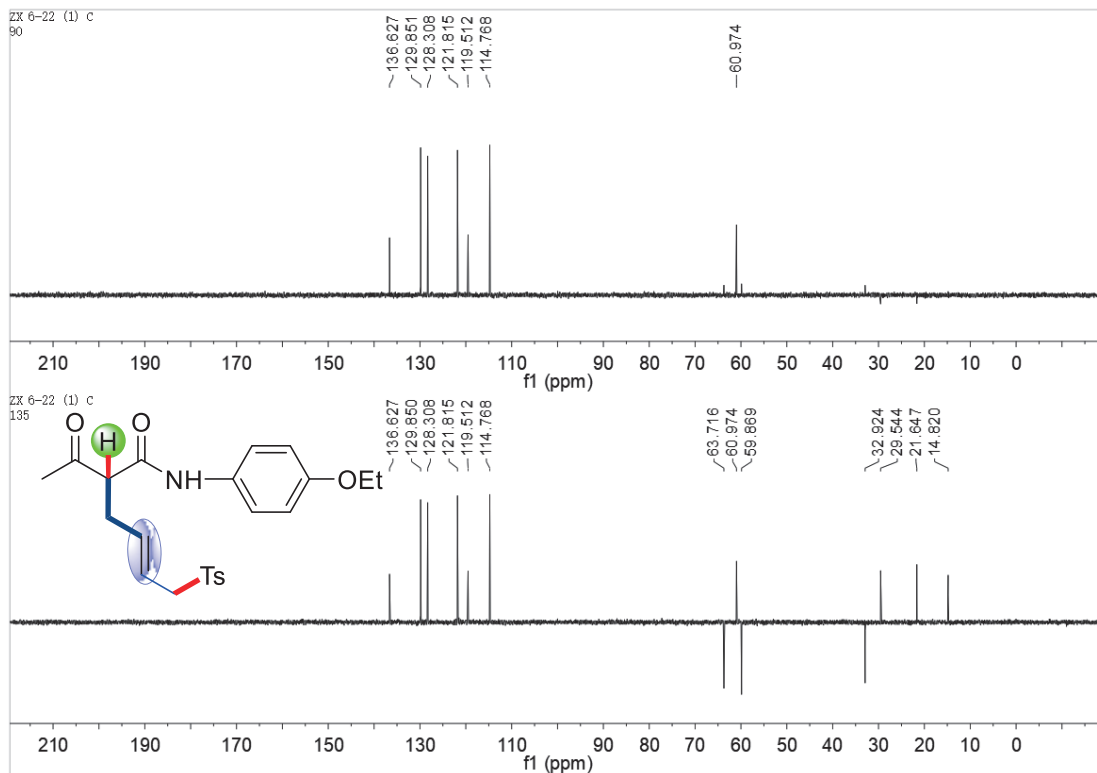

### 4e4, <sup>1</sup>H NMR

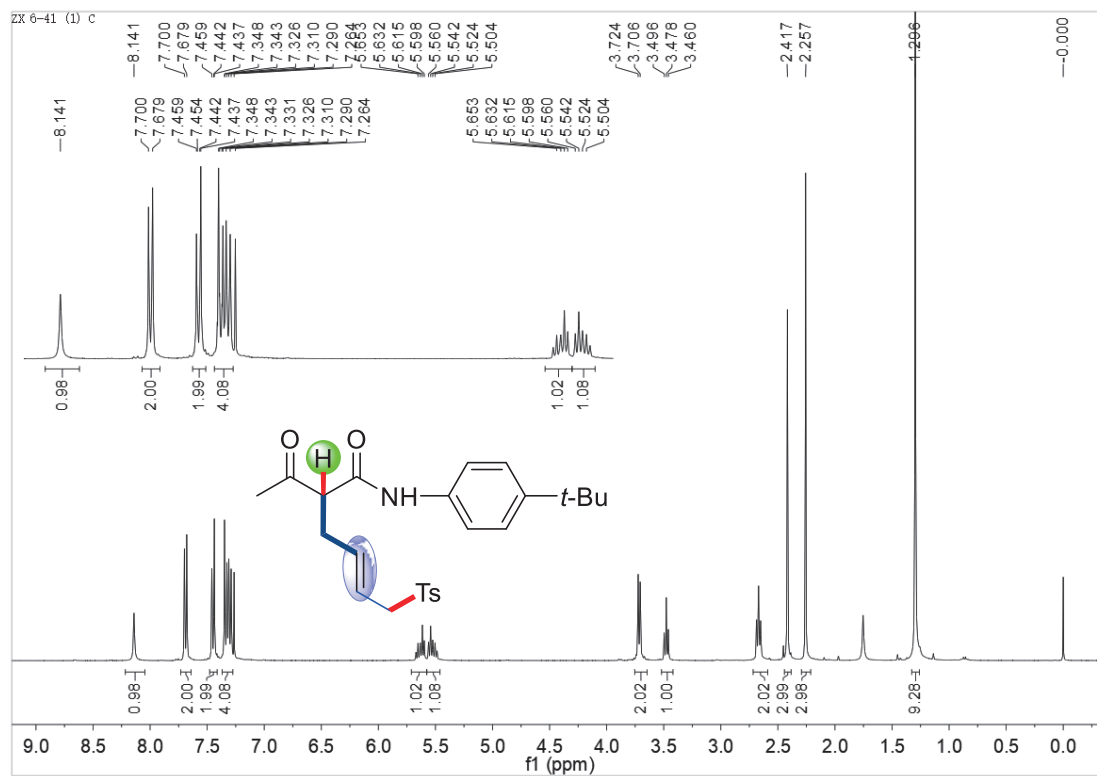

### 4e4, <sup>13</sup>C NMR

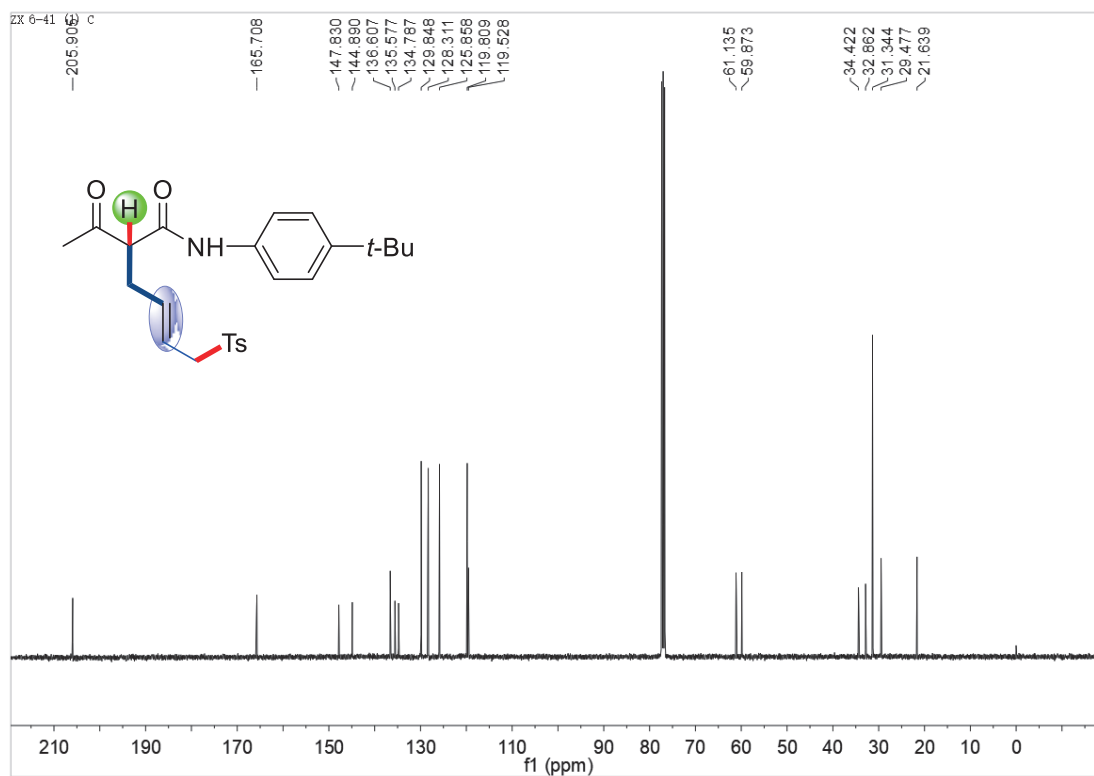

### 4e4, DEPT 90 and DEPT 135

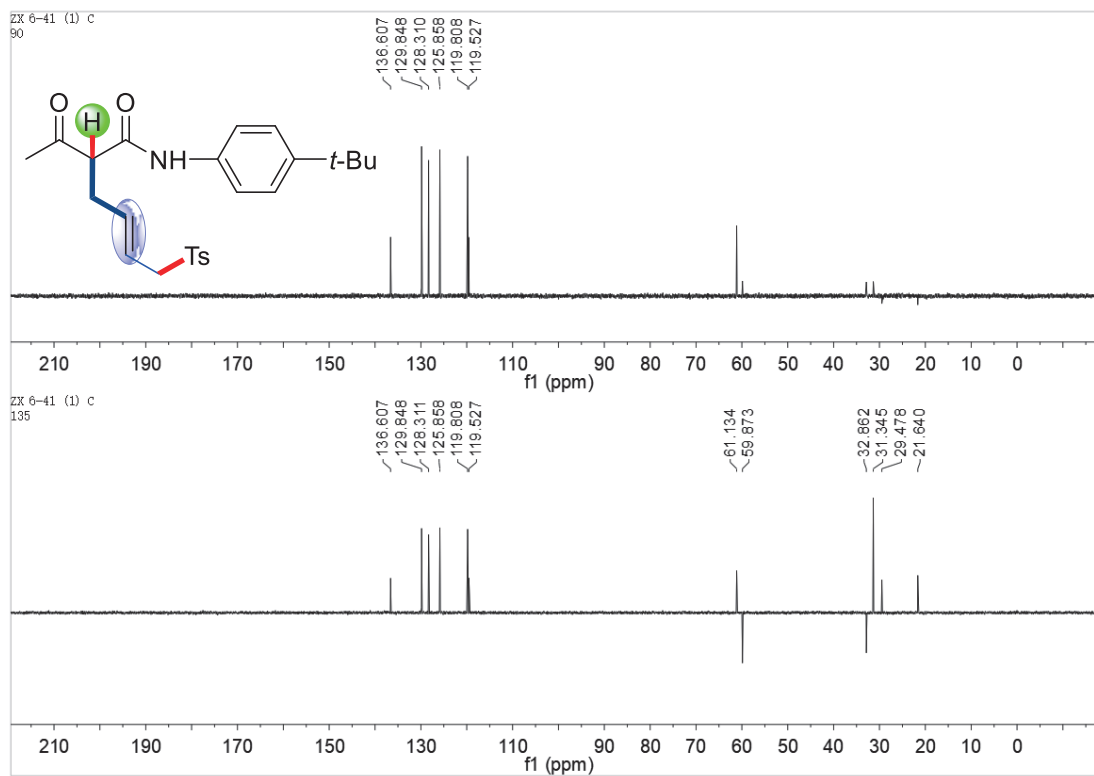

### 4e5, <sup>1</sup>H NMR

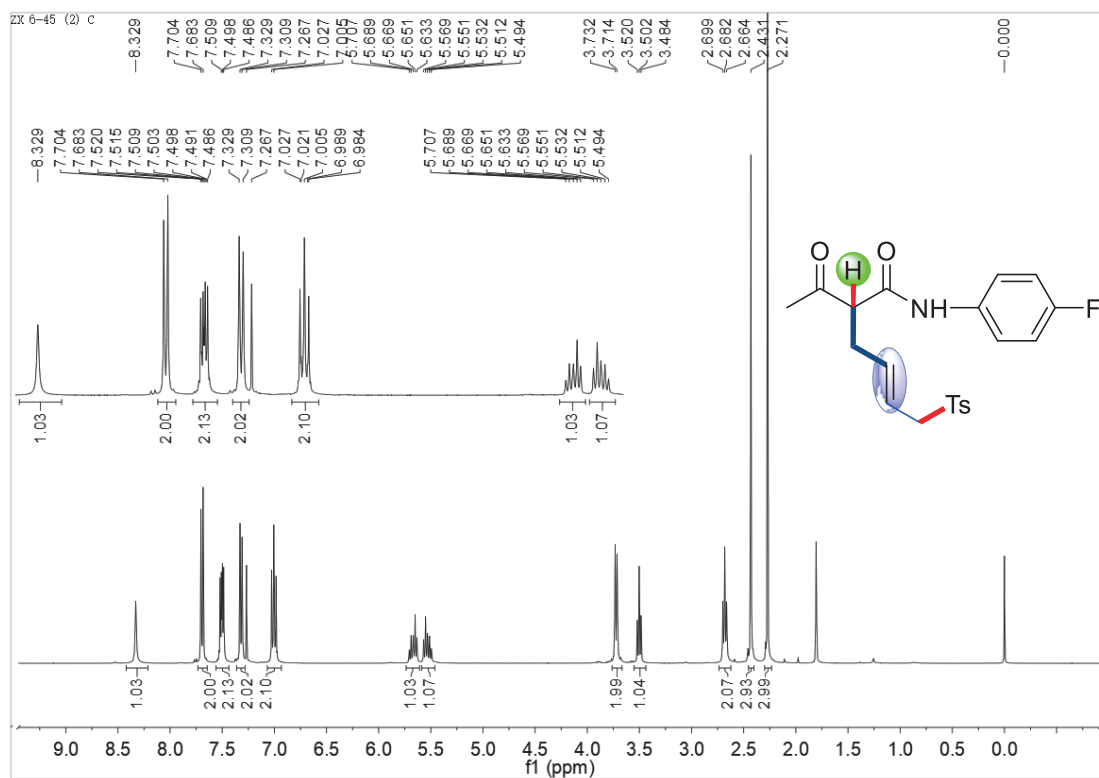

### 4e5, <sup>13</sup>C NMR

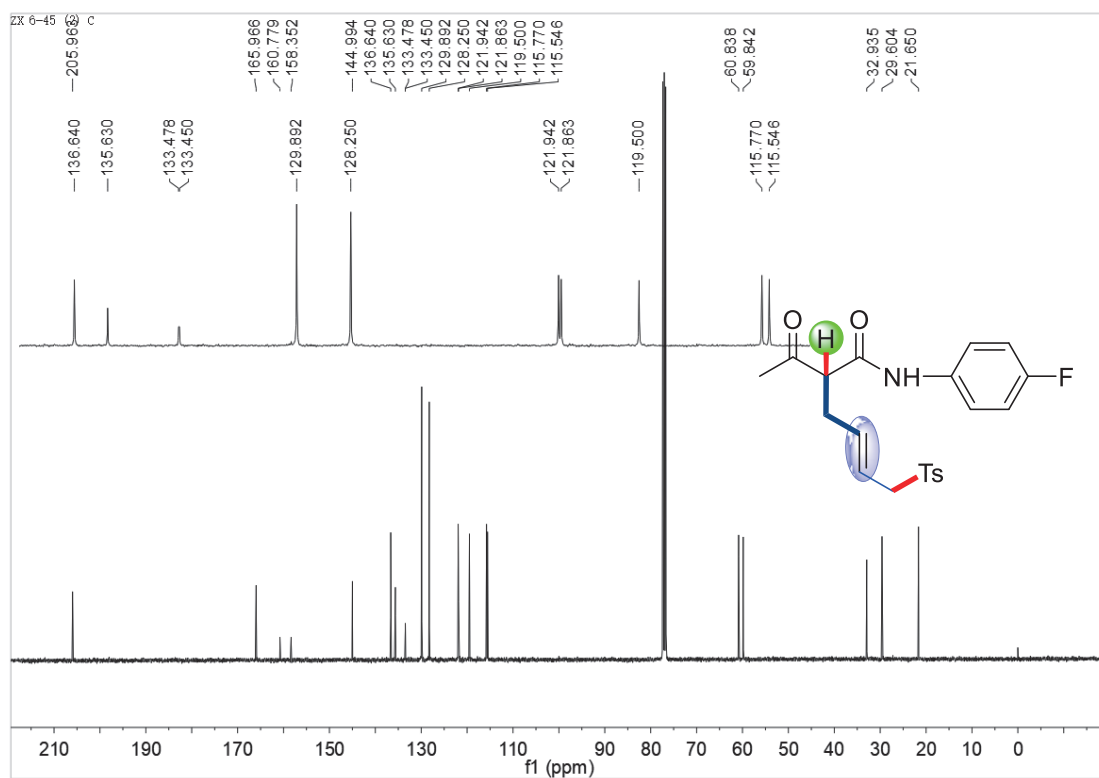



### 4e5, DEPT 90 and DEPT 135

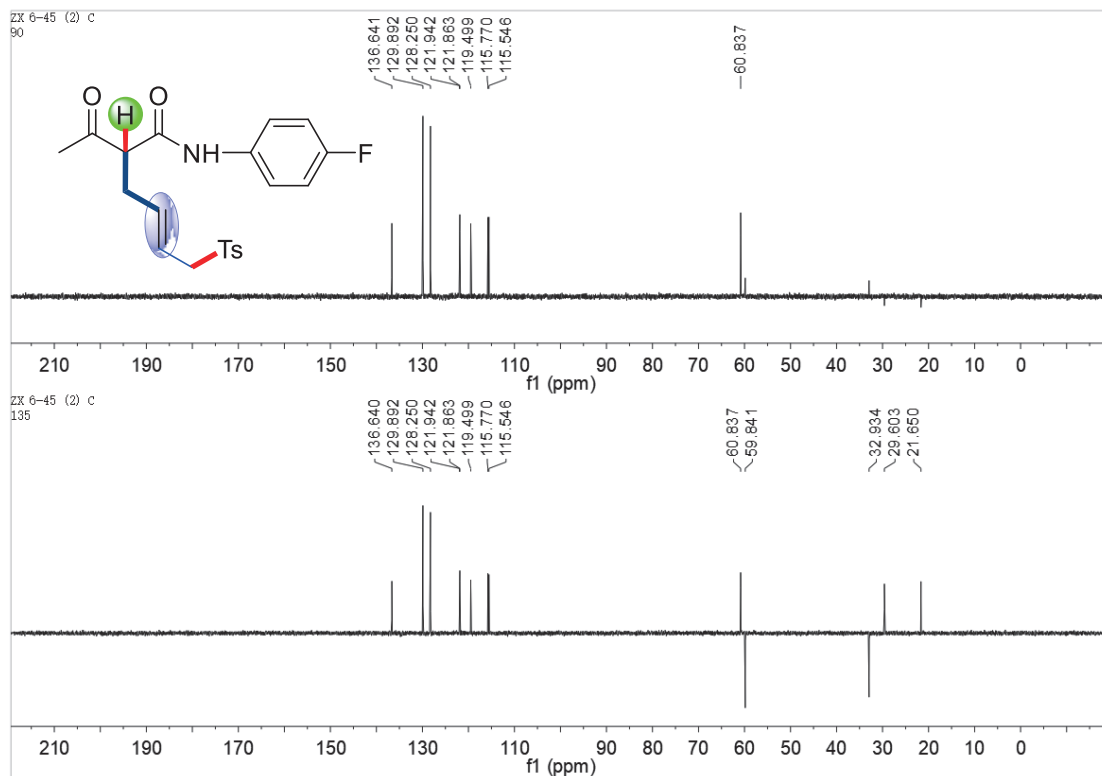

### 4e5, <sup>19</sup>F NMR

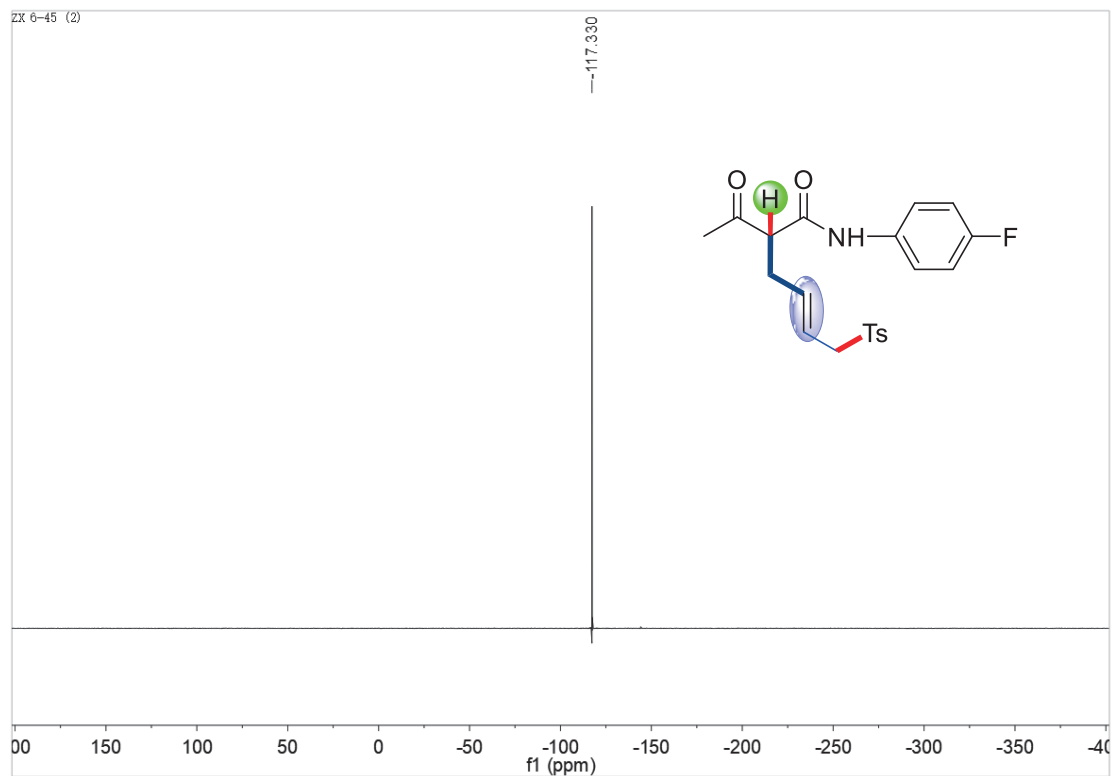

### 4e6, <sup>1</sup>H NMR

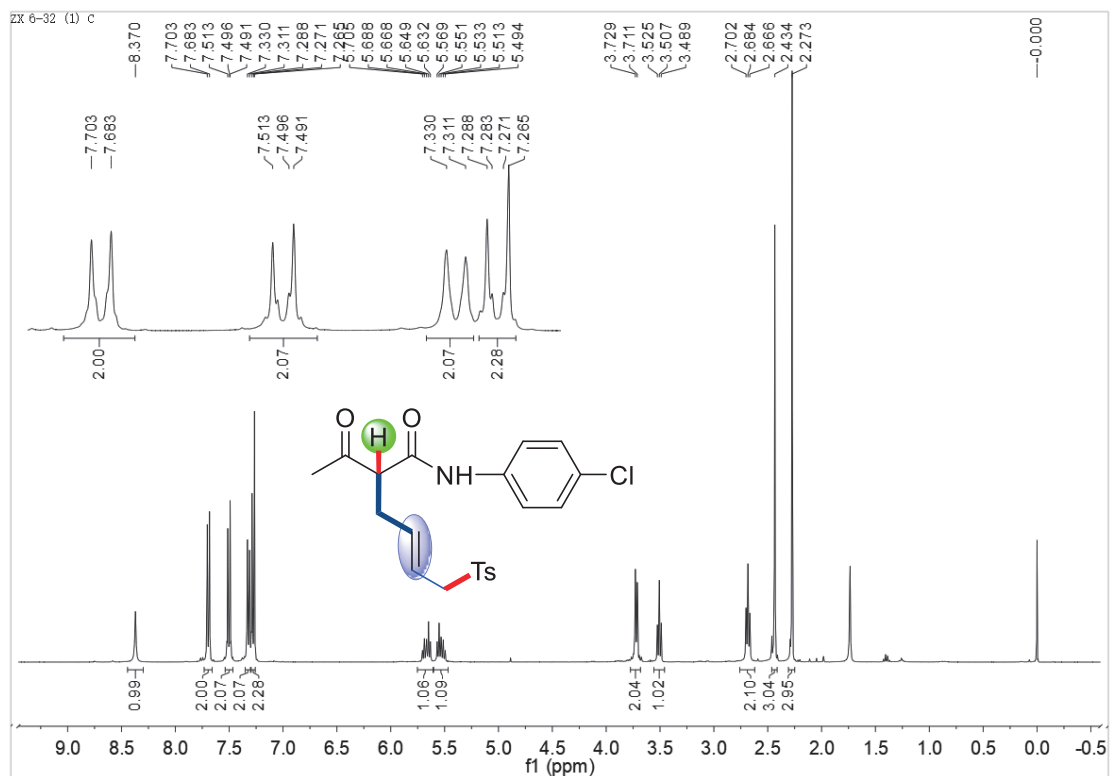

### 4e6, <sup>13</sup>C NMR

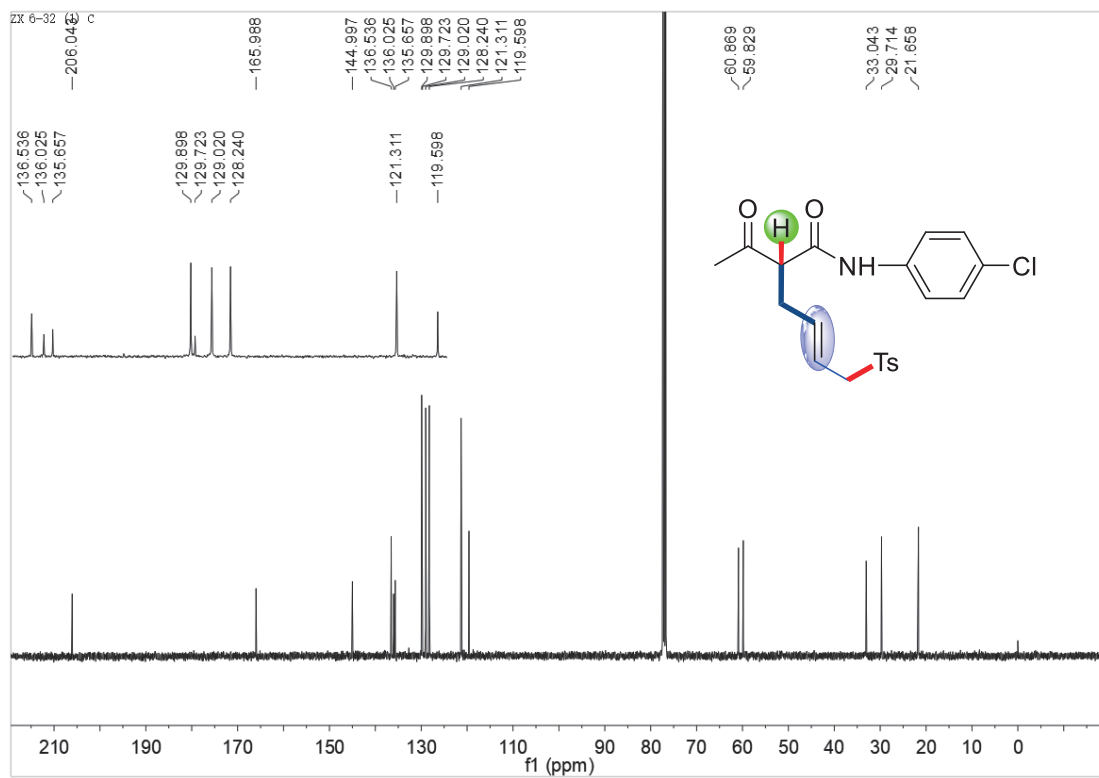

### 4e6, DEPT 90 and DEPT 135

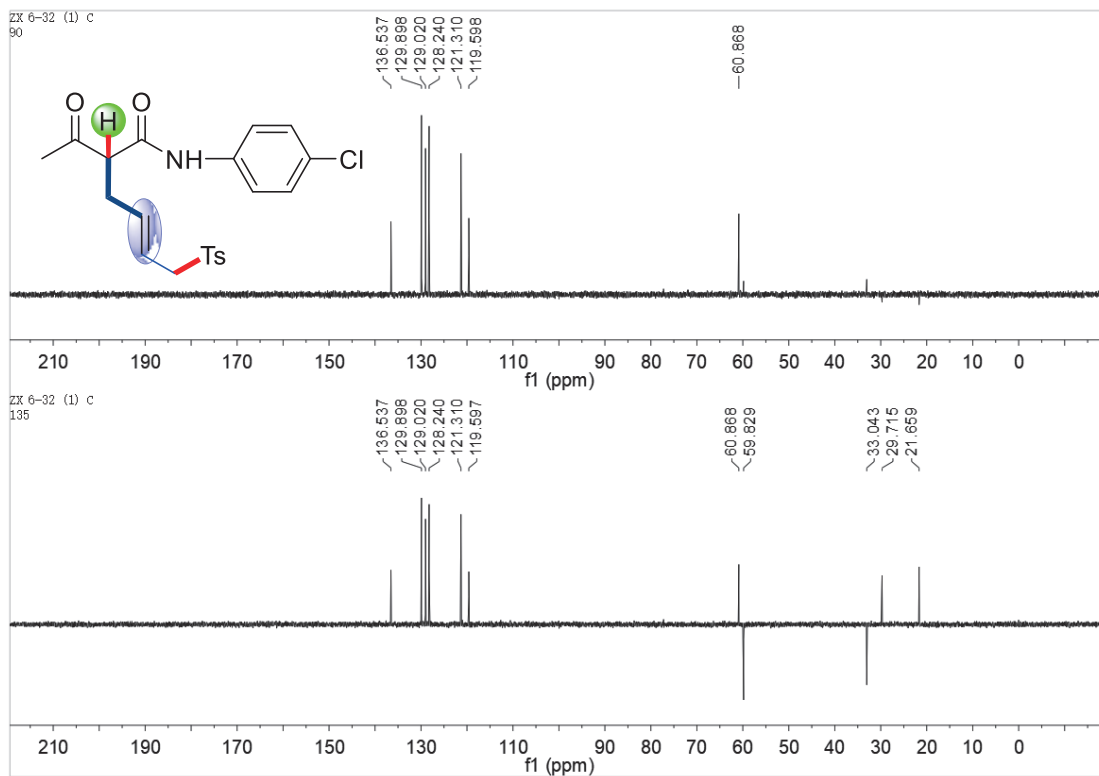

### 4e7, <sup>1</sup>H NMR

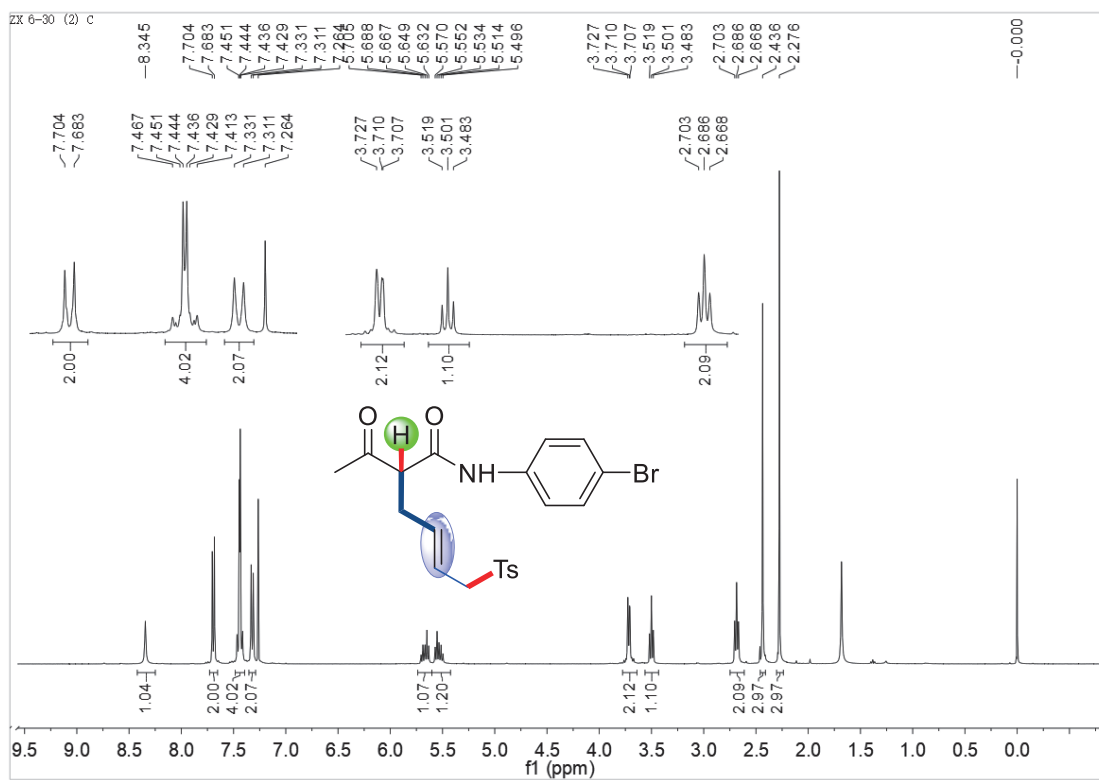

### 4e7, <sup>13</sup>C NMR

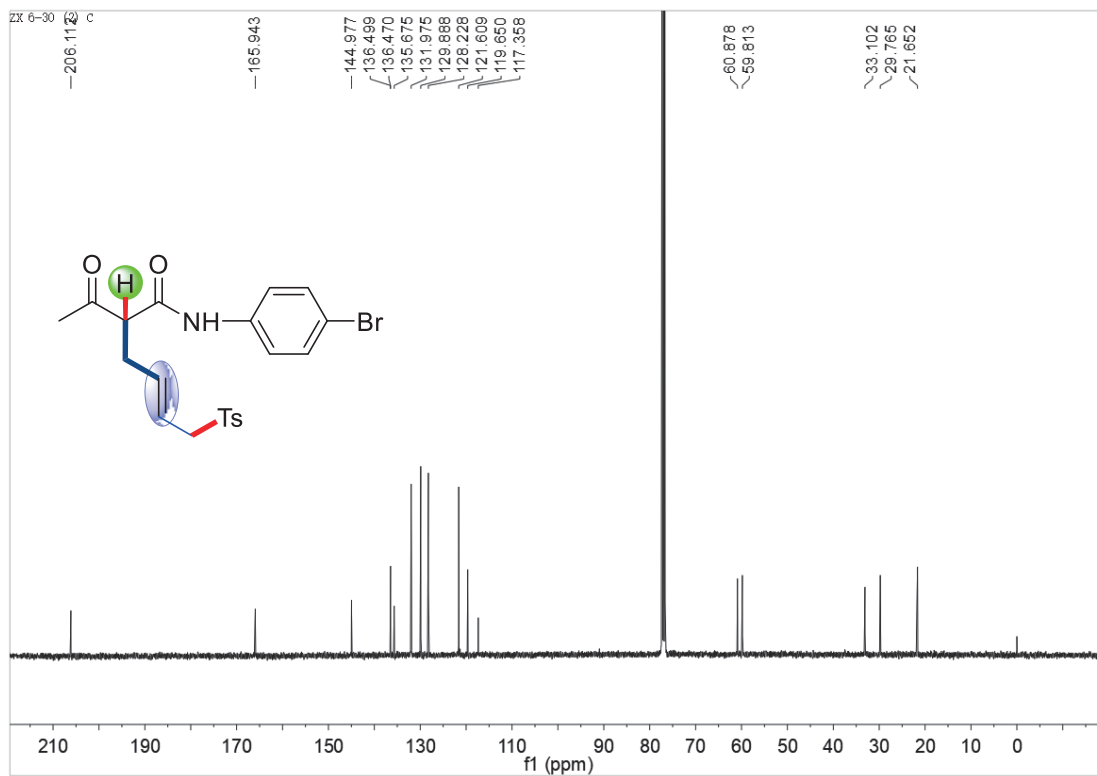

### 4e7, DEPT 90 and DEPT 135

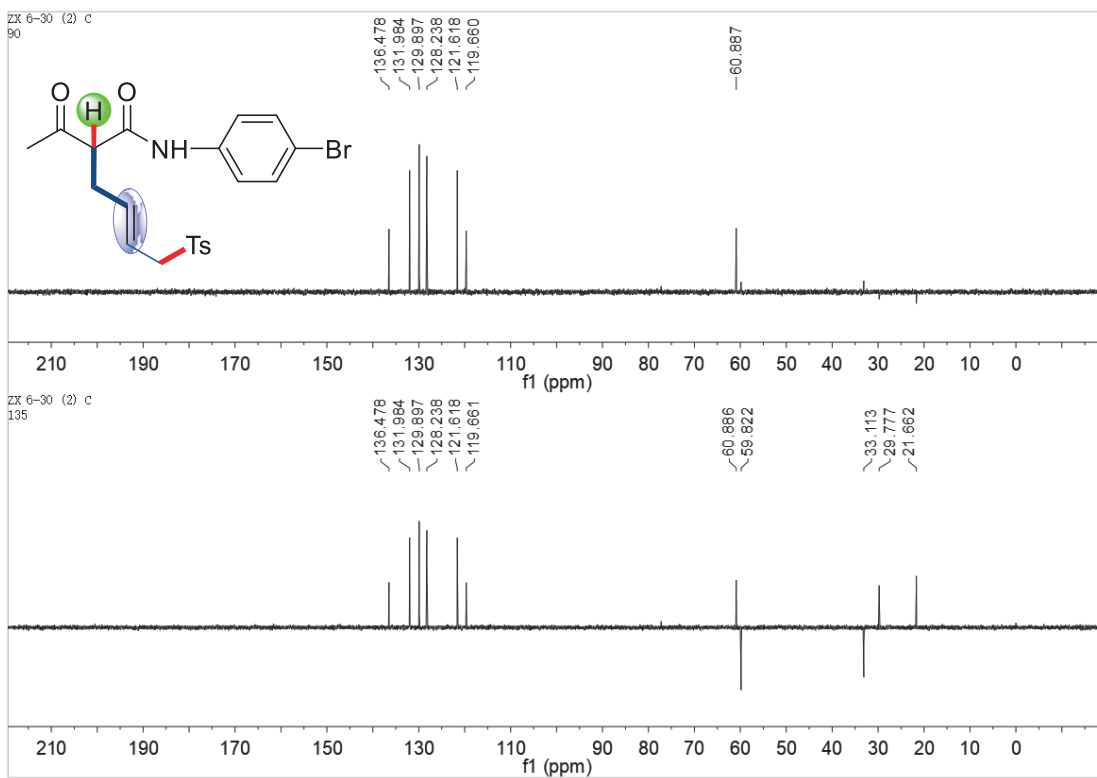

### 4e8, <sup>1</sup>H NMR

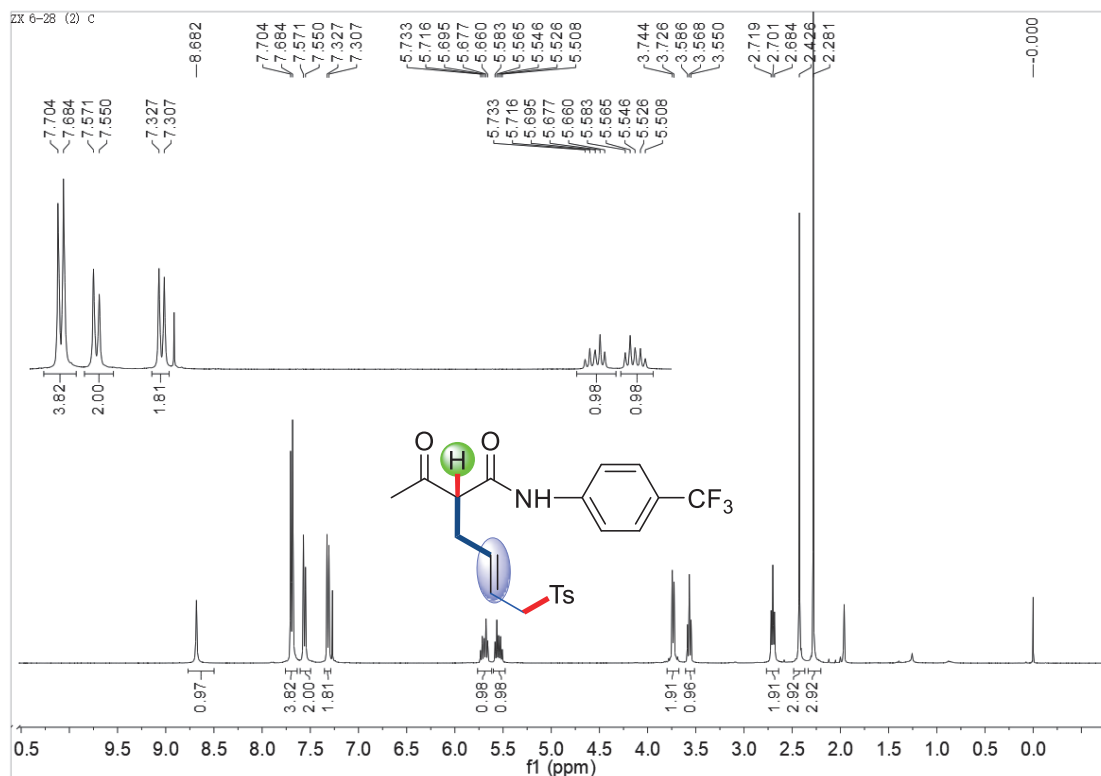

### 4e8, <sup>13</sup>C NMR

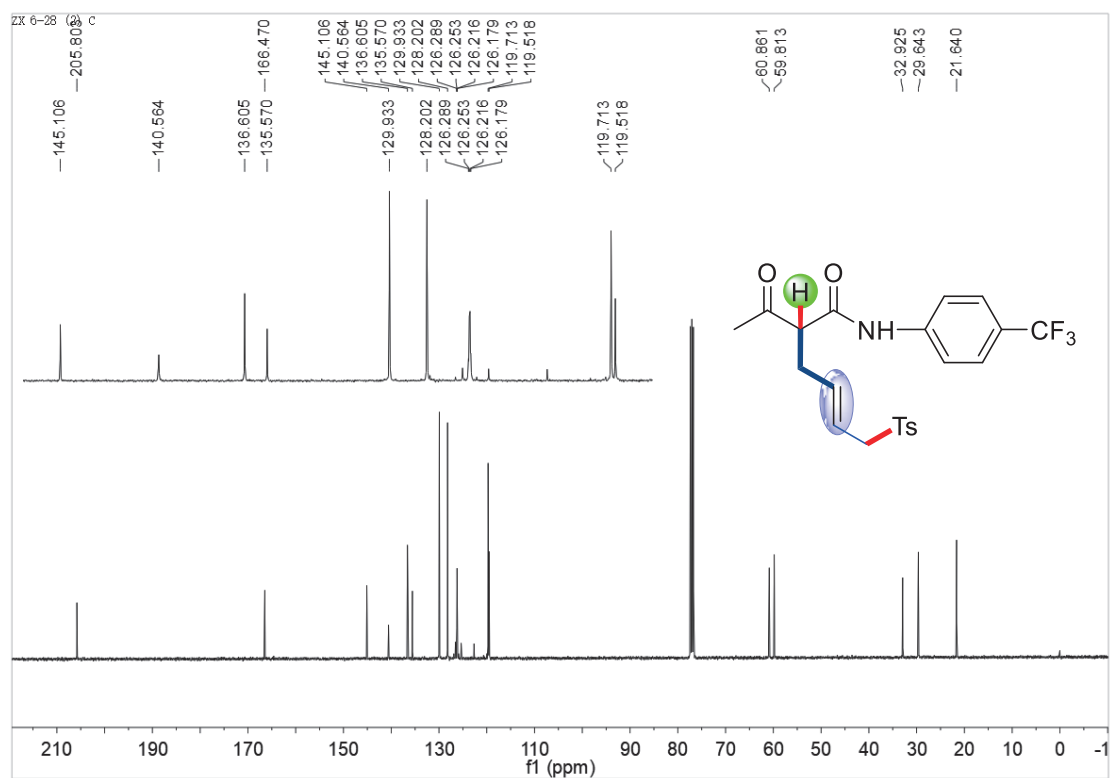

### 4e8, DEPT 90 and DEPT 135

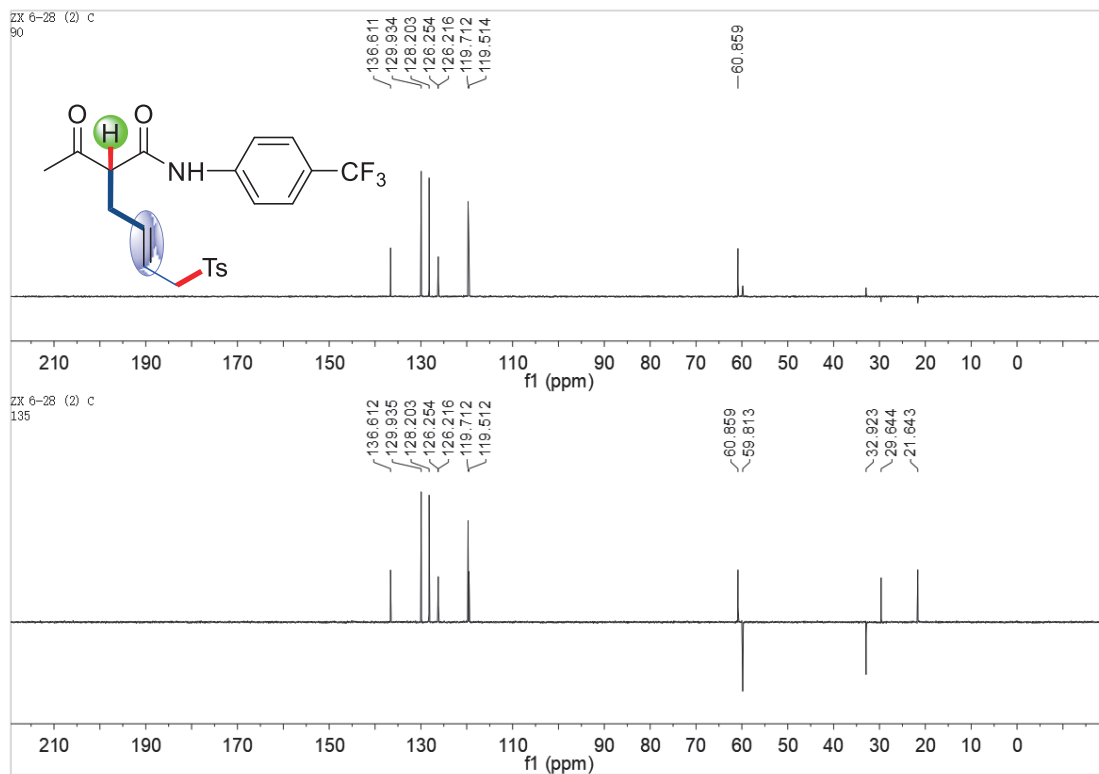

### 4e8, <sup>19</sup>F NMR

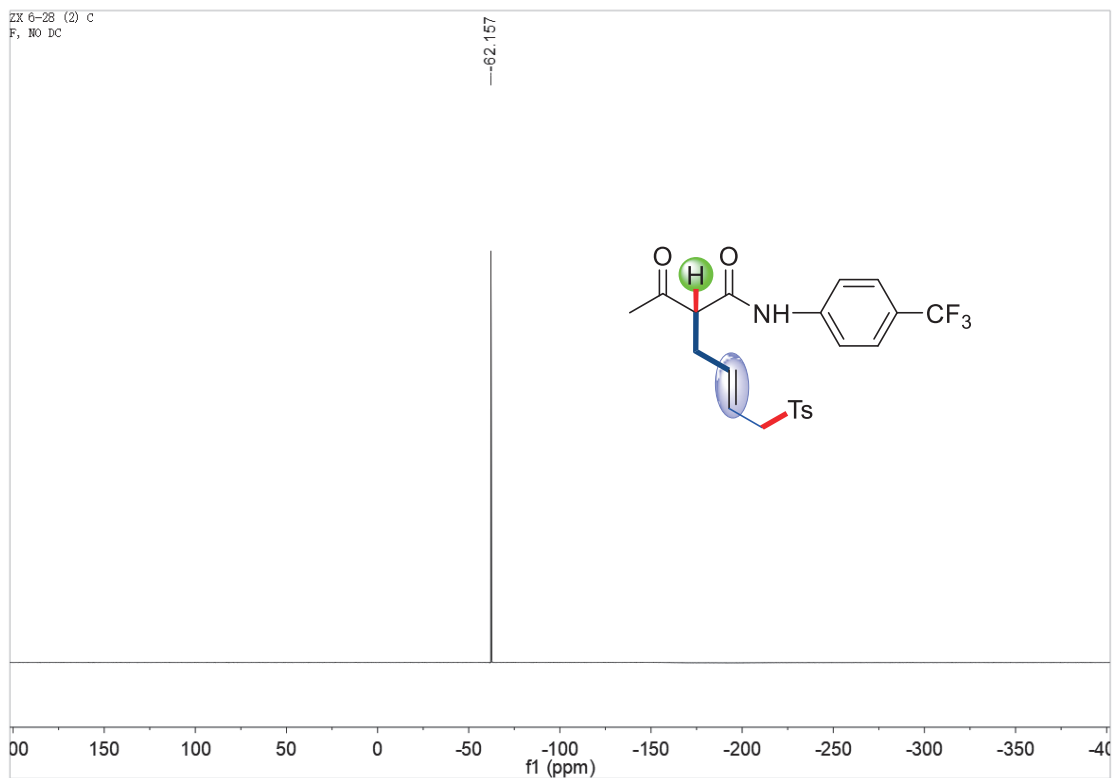

### 4e9, <sup>1</sup>H NMR

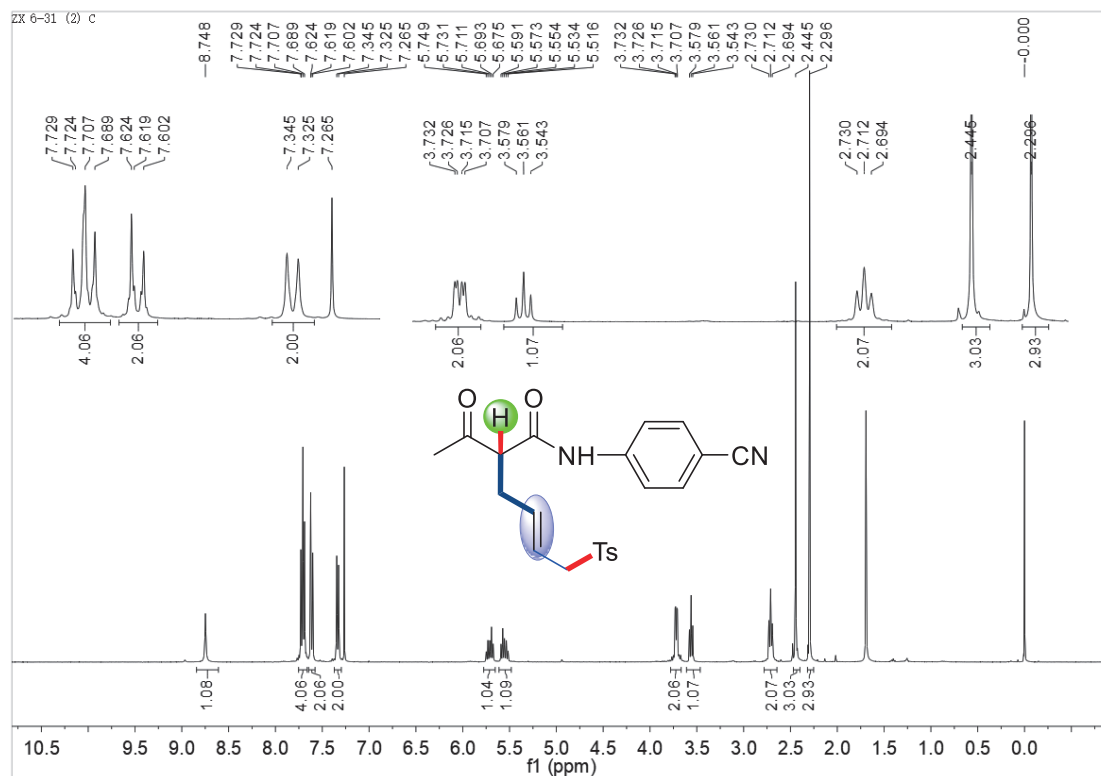

### 4e9, <sup>13</sup>C NMR

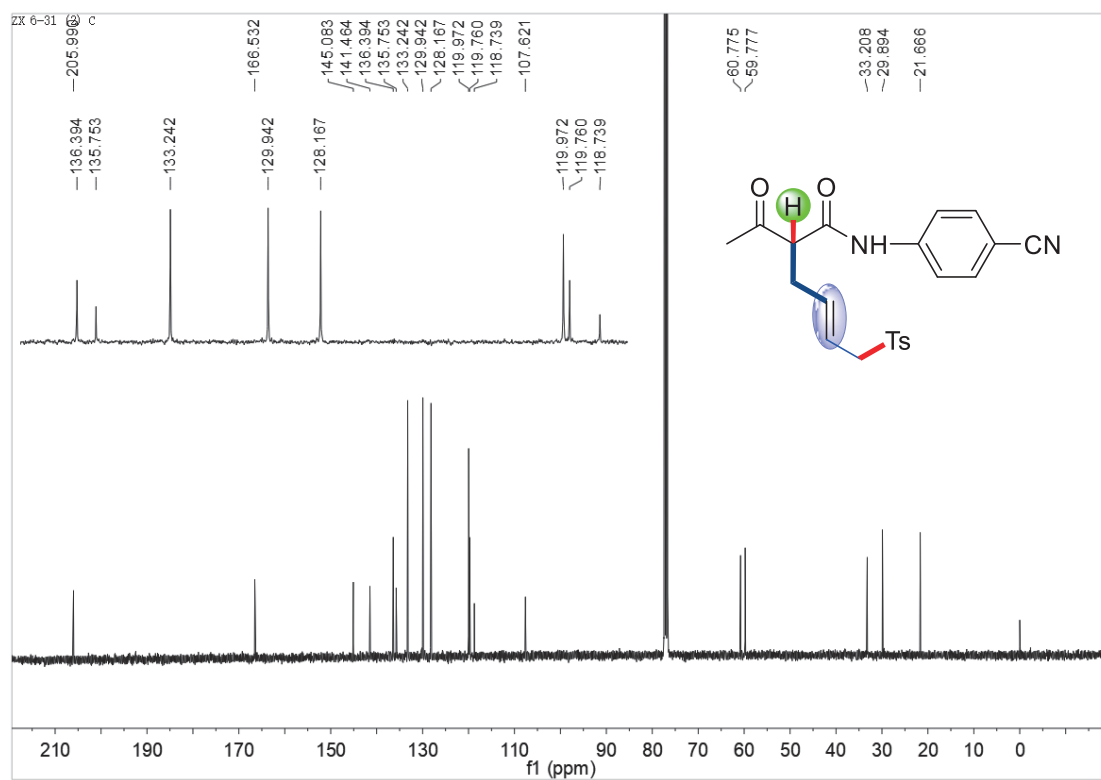

### 4e9, DEPT 90 and DEPT 135

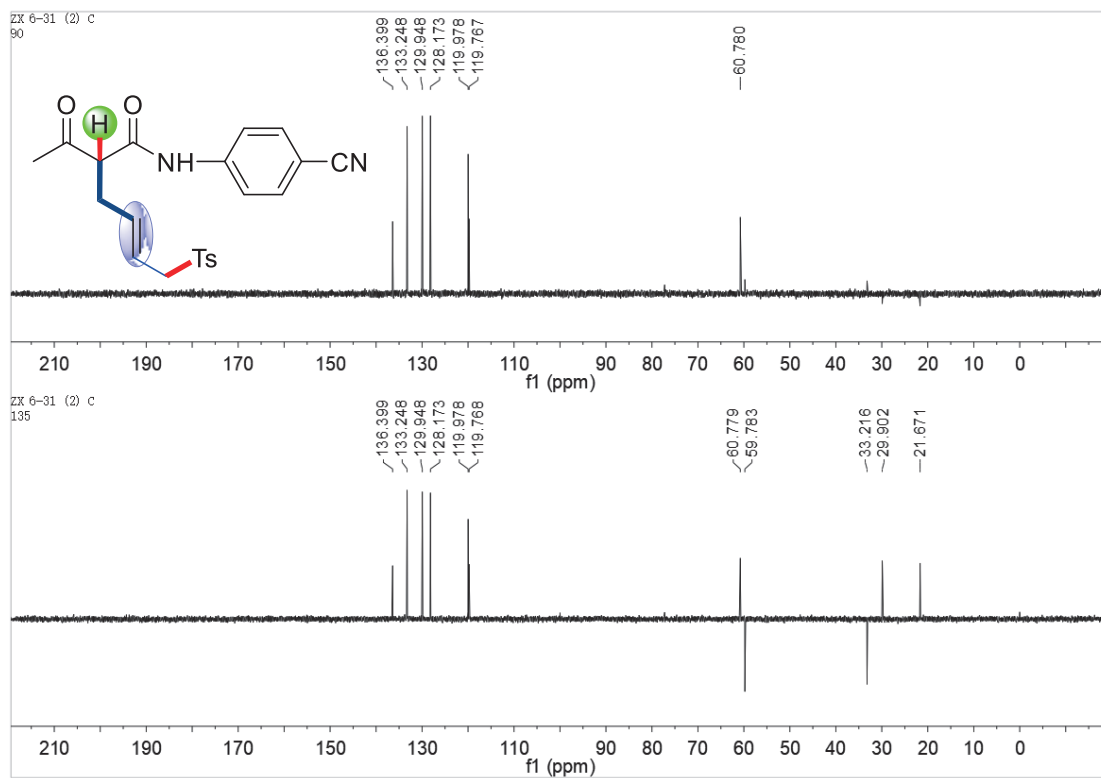

### 4e10, <sup>1</sup>H NMR

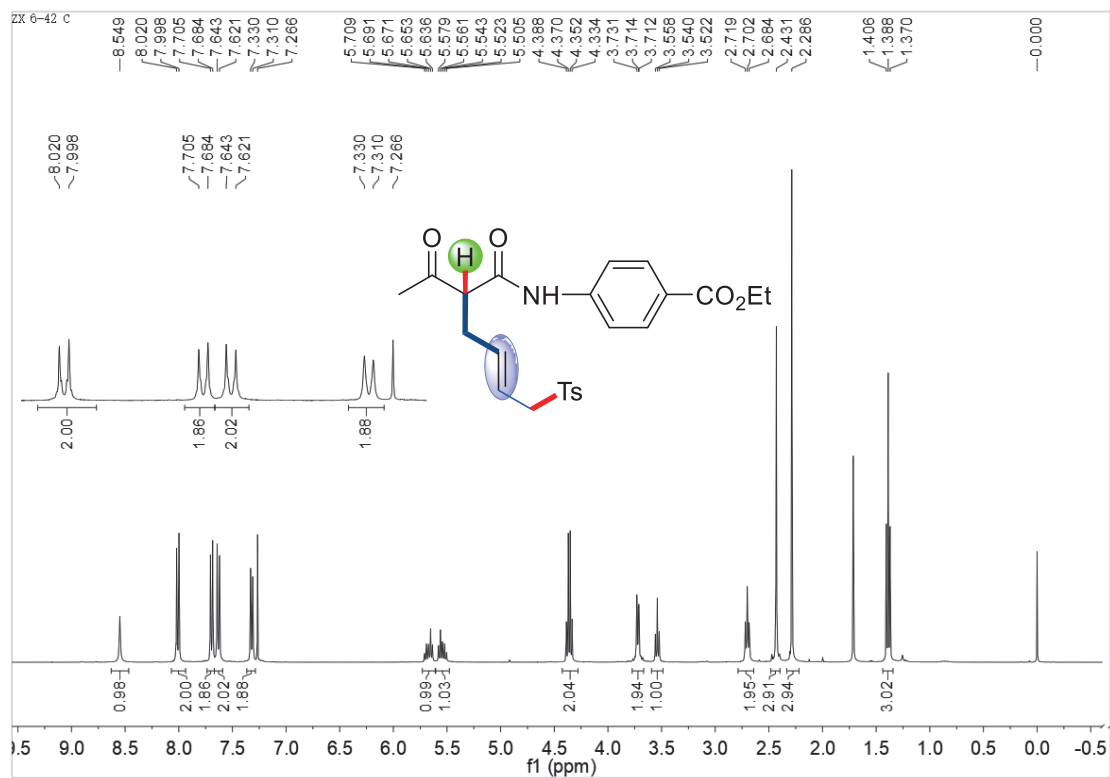



4e10,  $^{13}\text{C}$  NMR

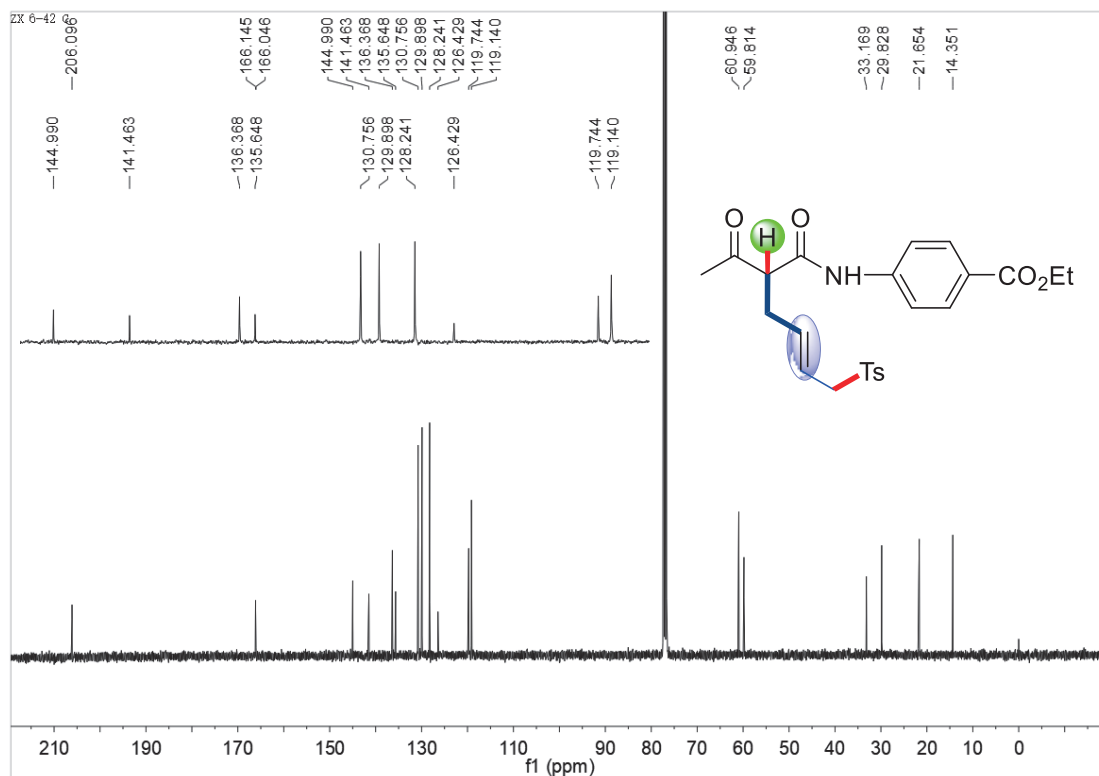

4e10, DEPT 90 and DEPT 135

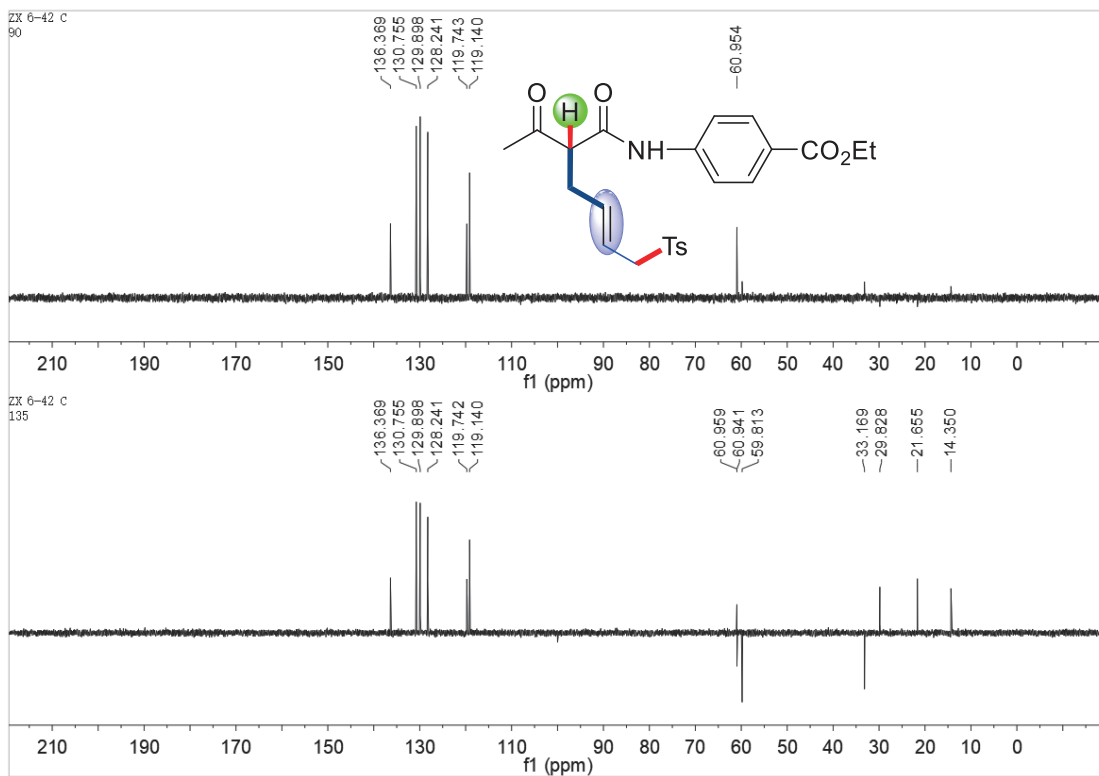

4e11, <sup>1</sup>H NMR

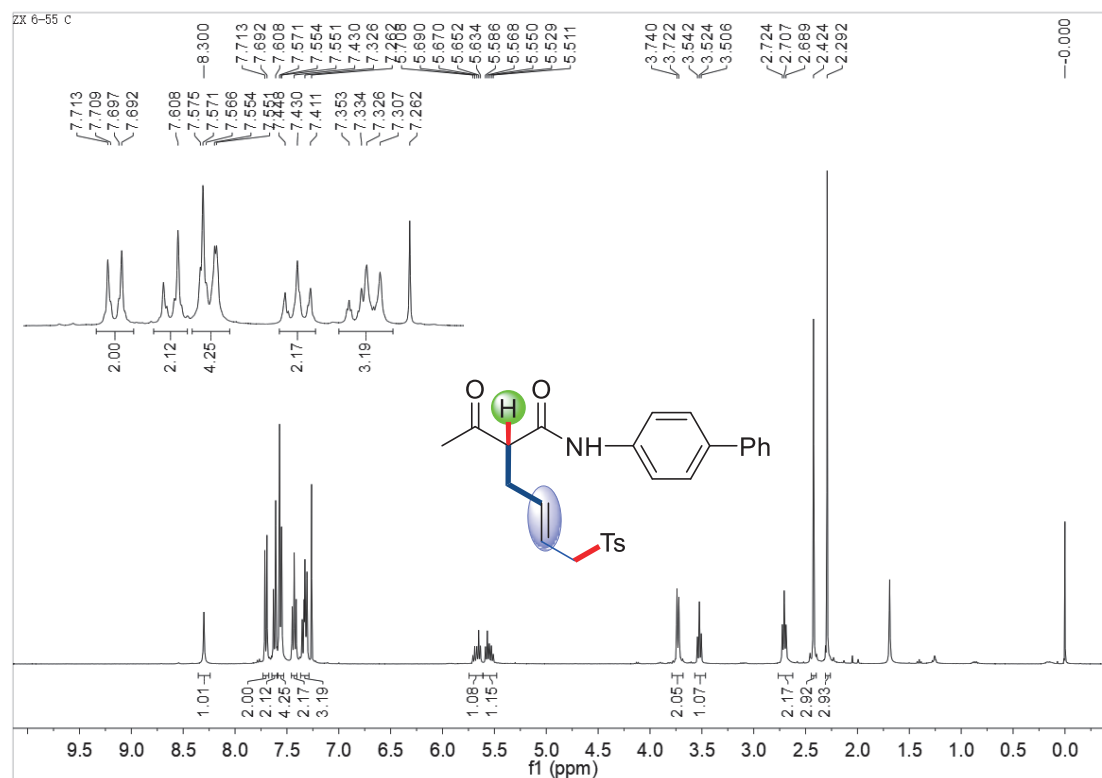

4e11, <sup>13</sup>C NMR

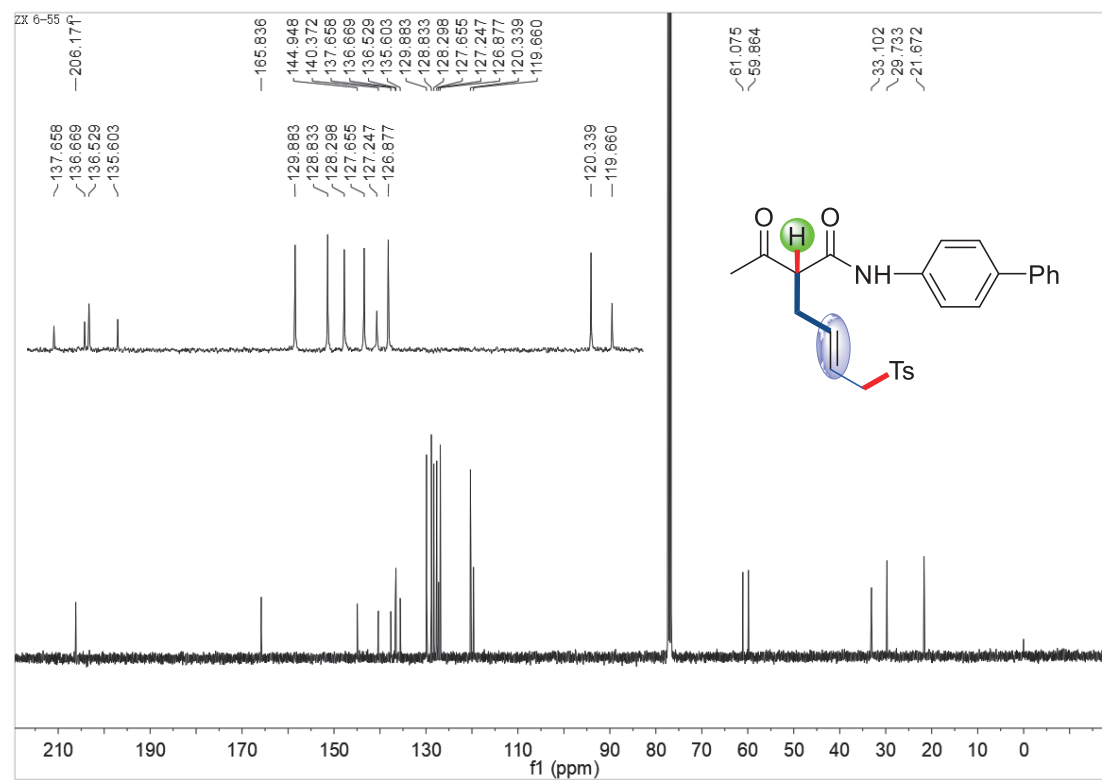

4e11, DEPT 90 and DEPT 135

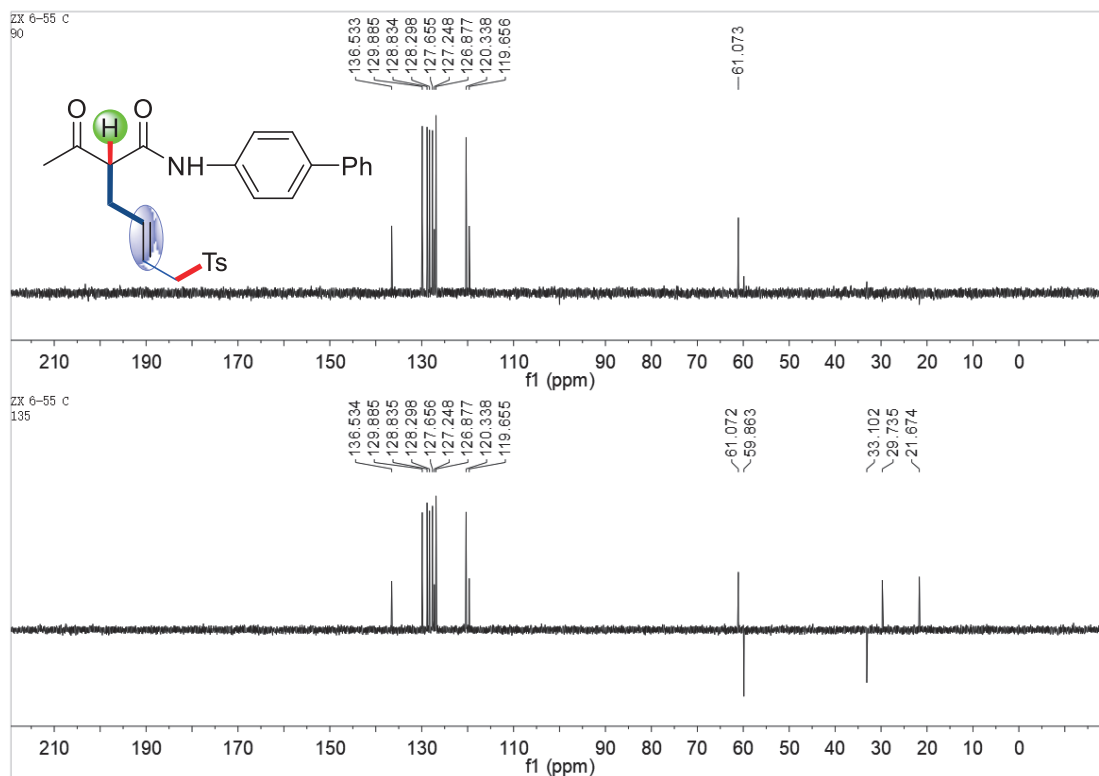

4f, <sup>1</sup>H NMR

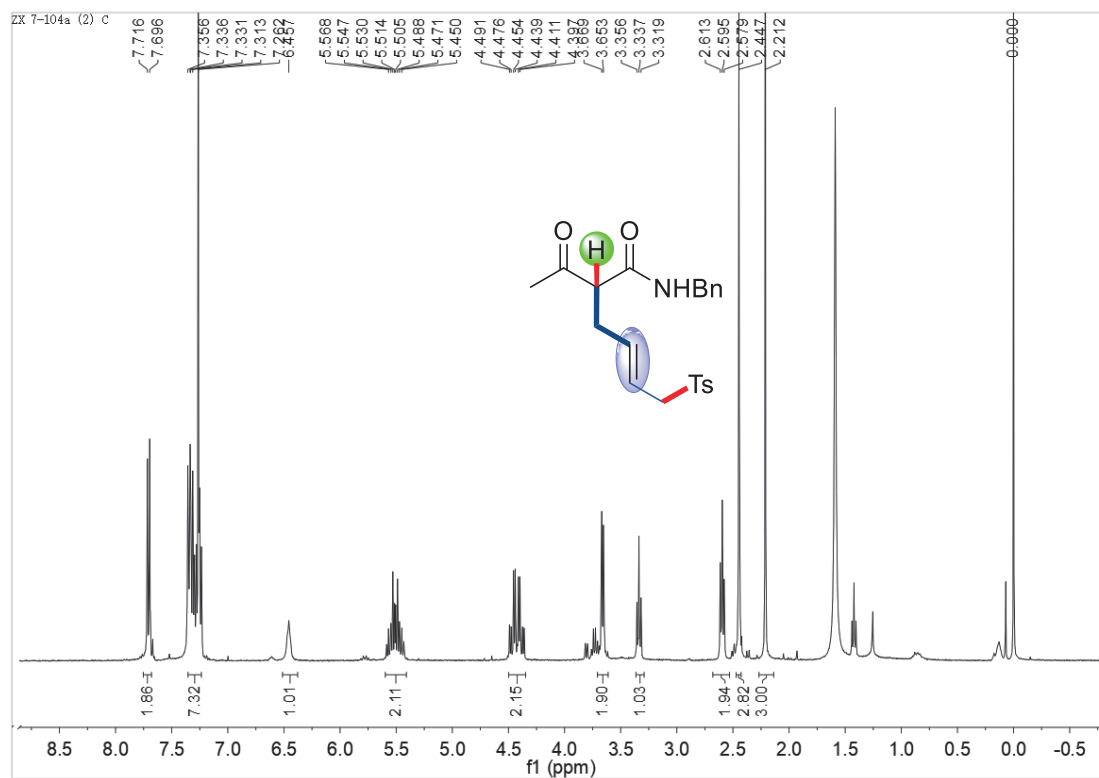

### 4f, <sup>13</sup>C NMR

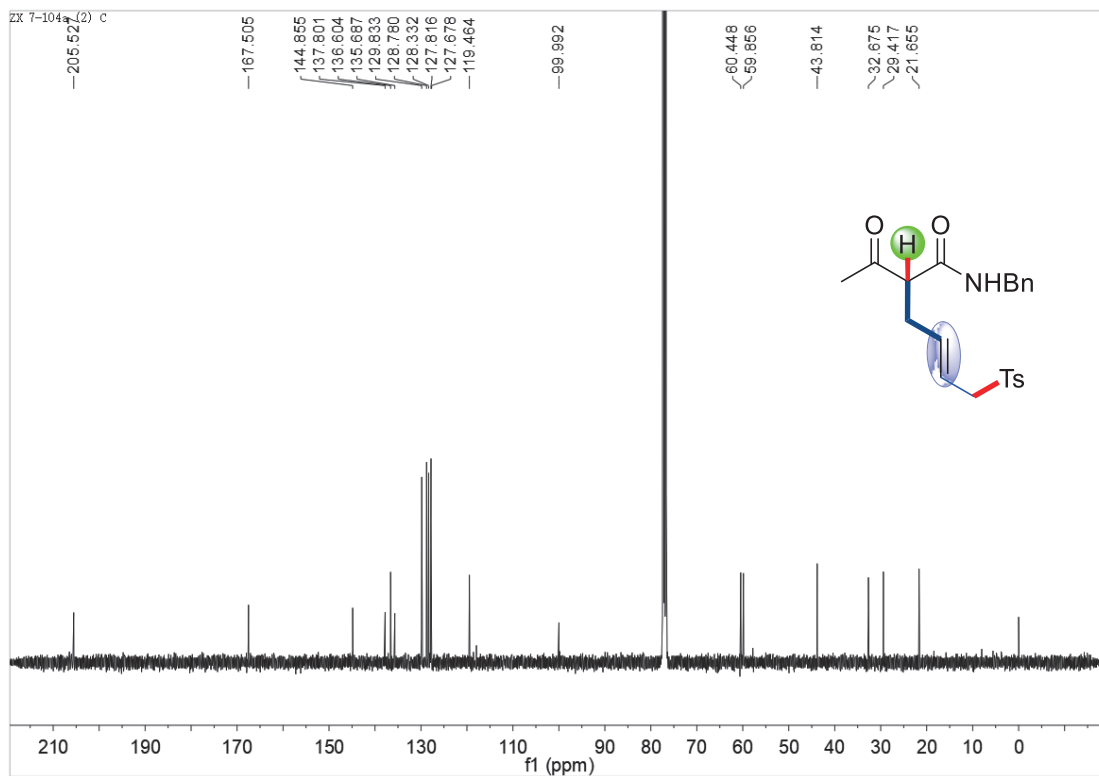

### 4f, DEPT 90 and DEPT 135

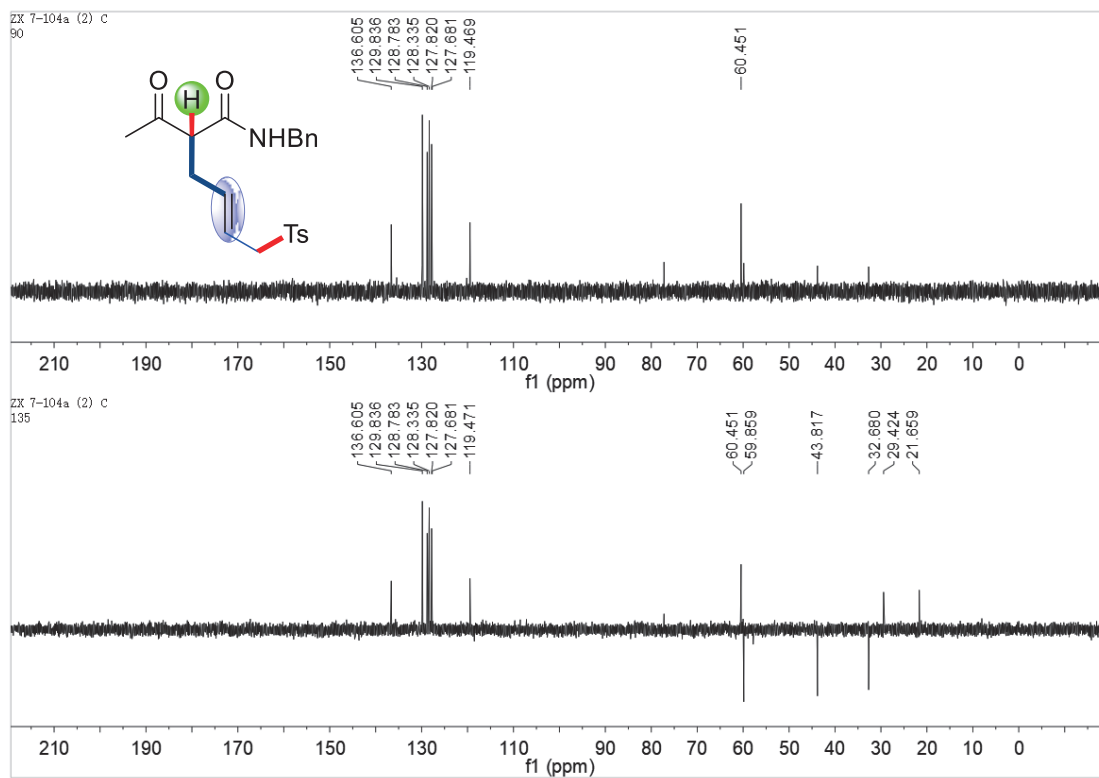

4g1, <sup>1</sup>H NMR

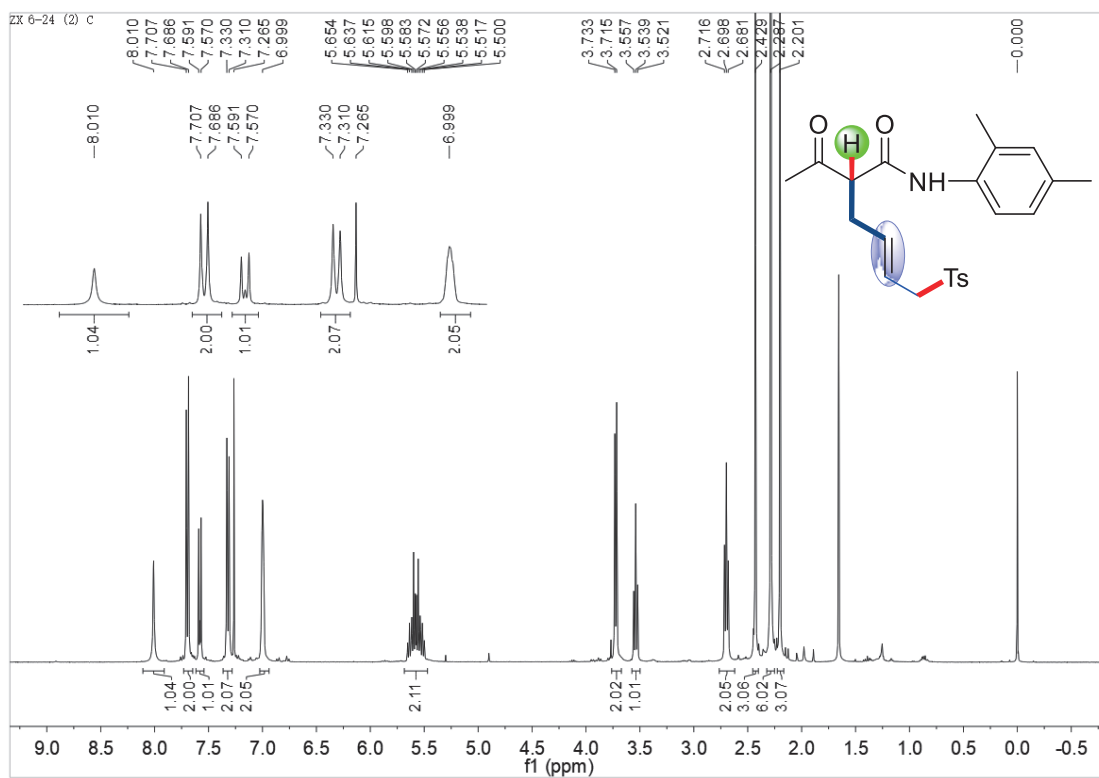

4g1, <sup>13</sup>C NMR

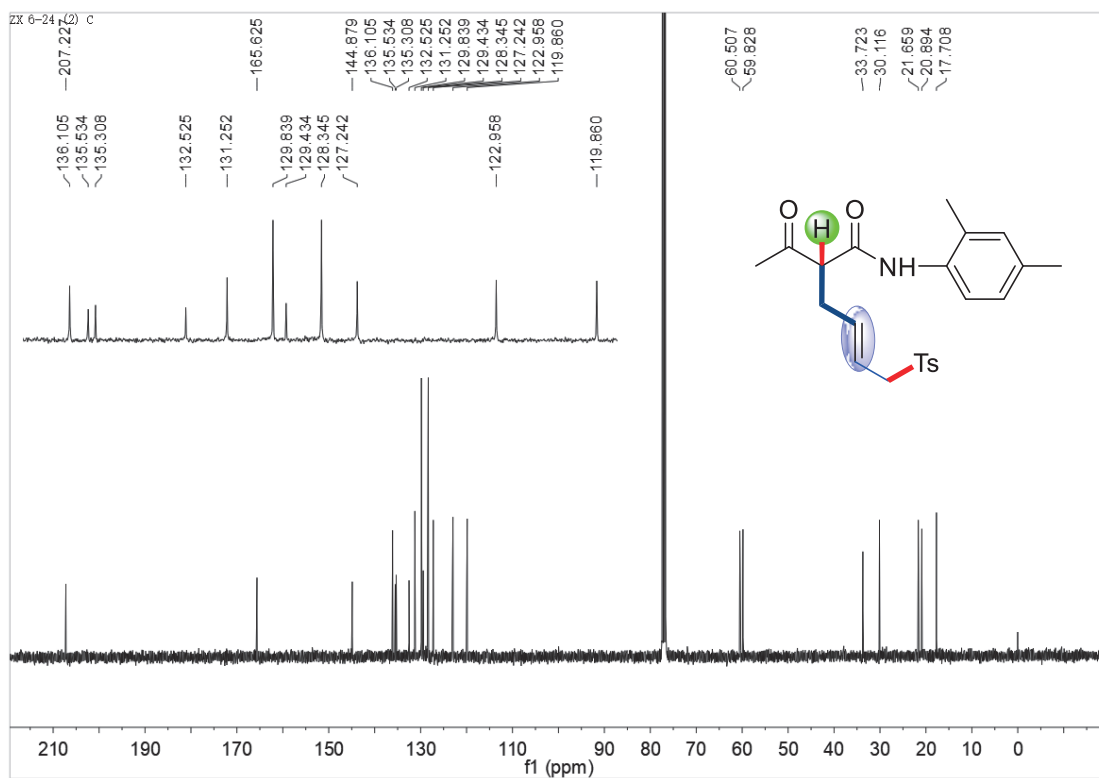

**4g1**, DEPT 90 and DEPT 135

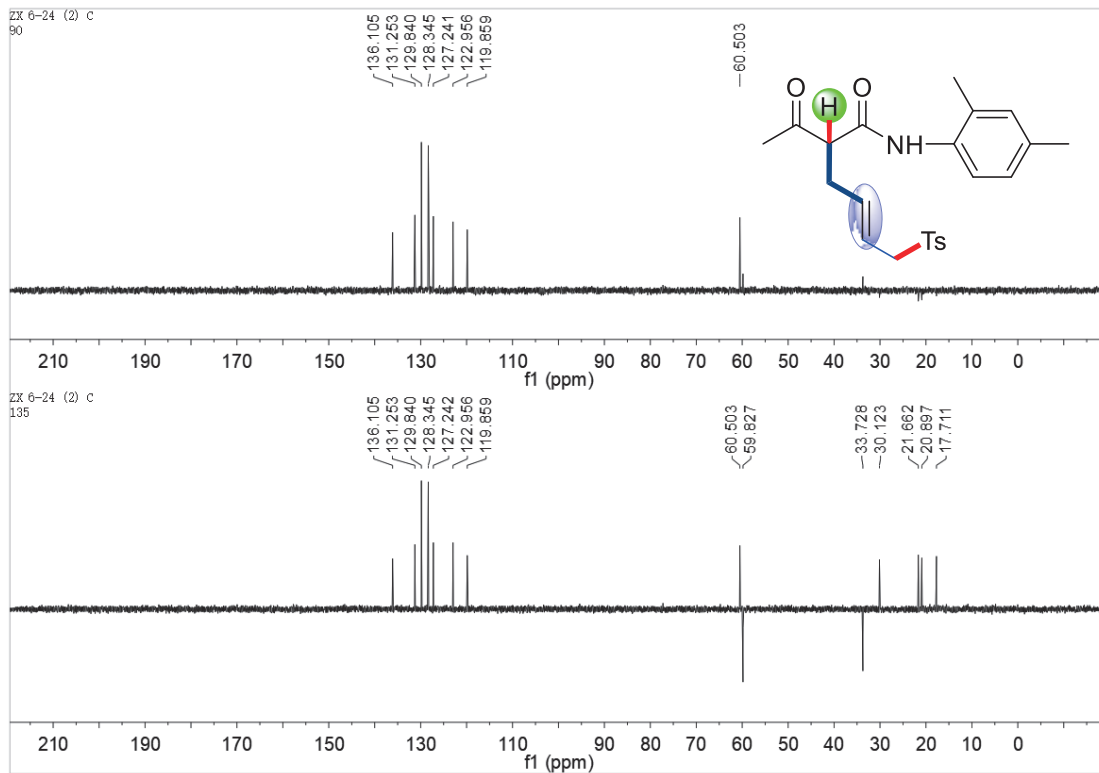

**4g2**, <sup>1</sup>H NMR

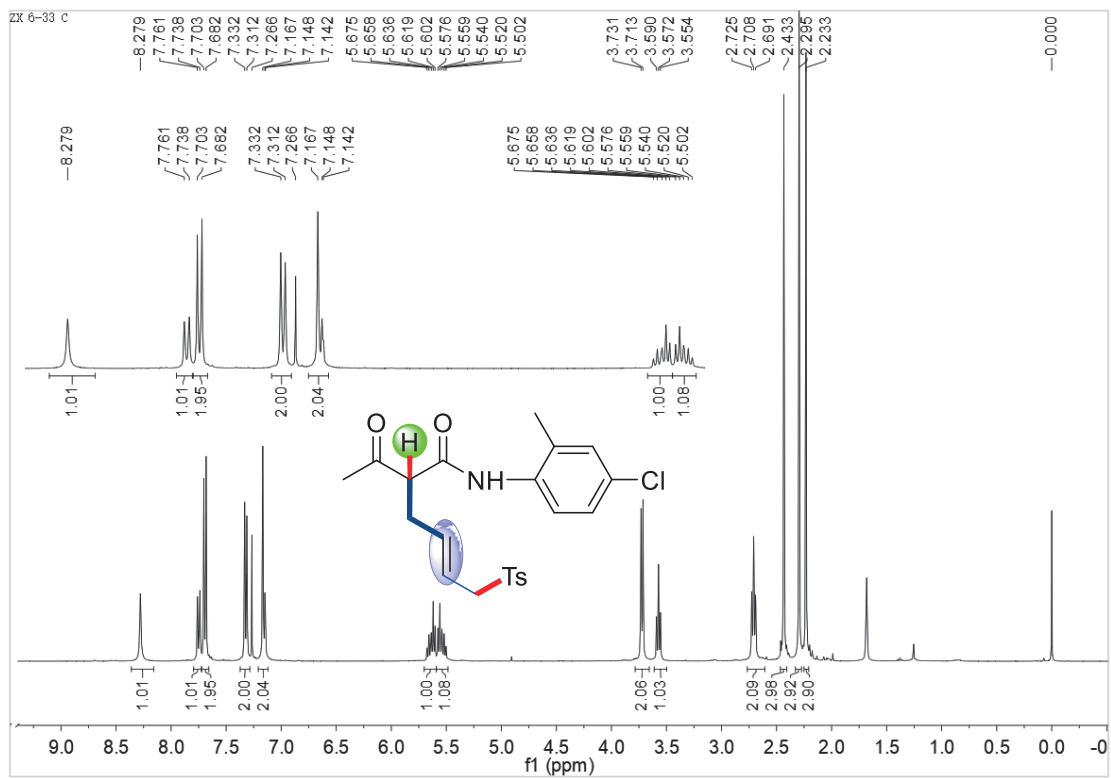

### 4g2, <sup>13</sup>C NMR

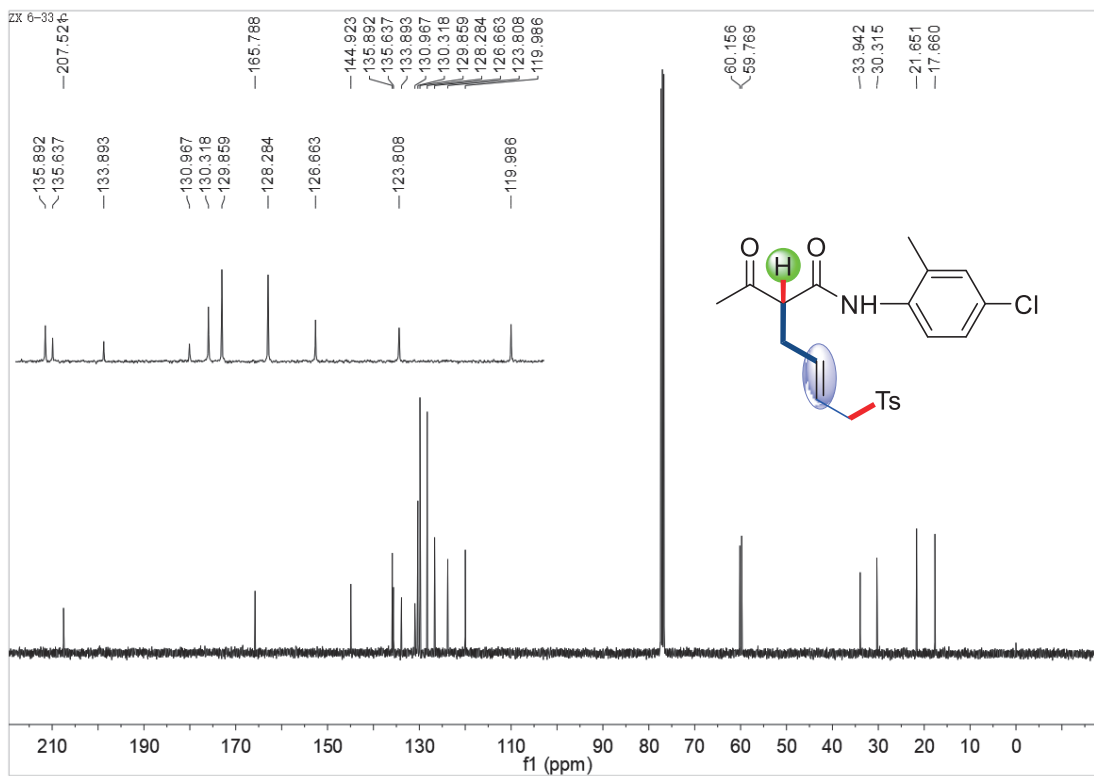

### 4g2, DEPT 90 and DEPT 135

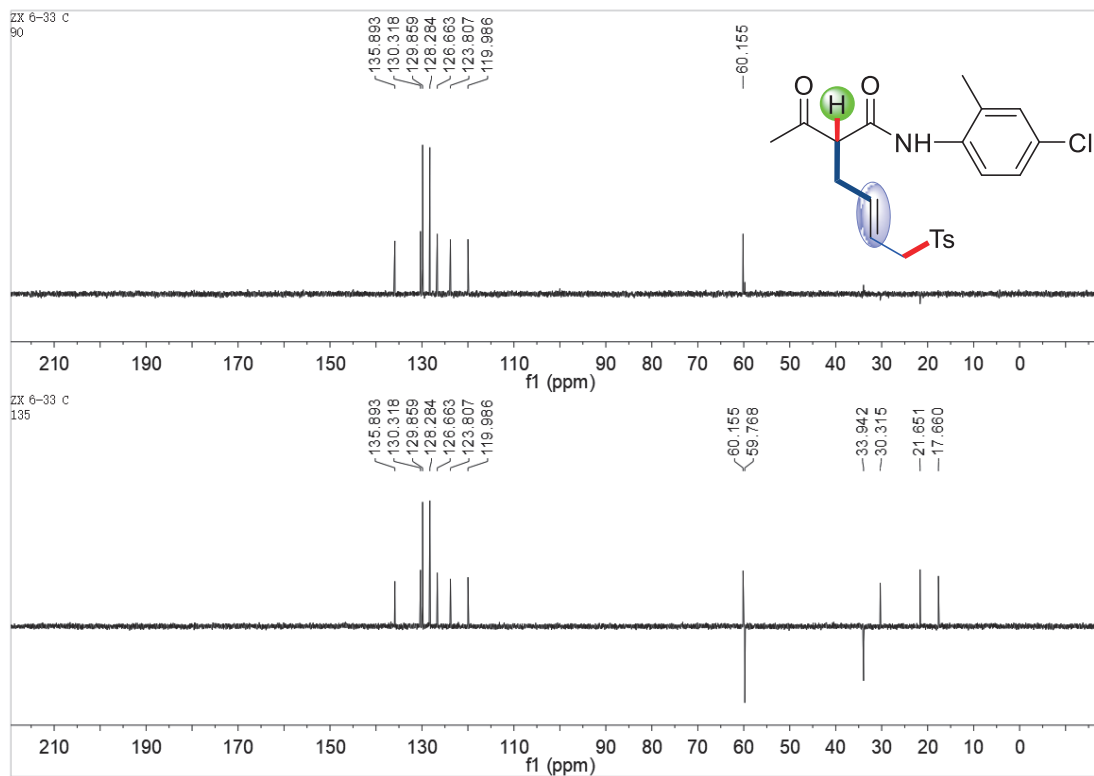

### 4h, <sup>1</sup>H NMR

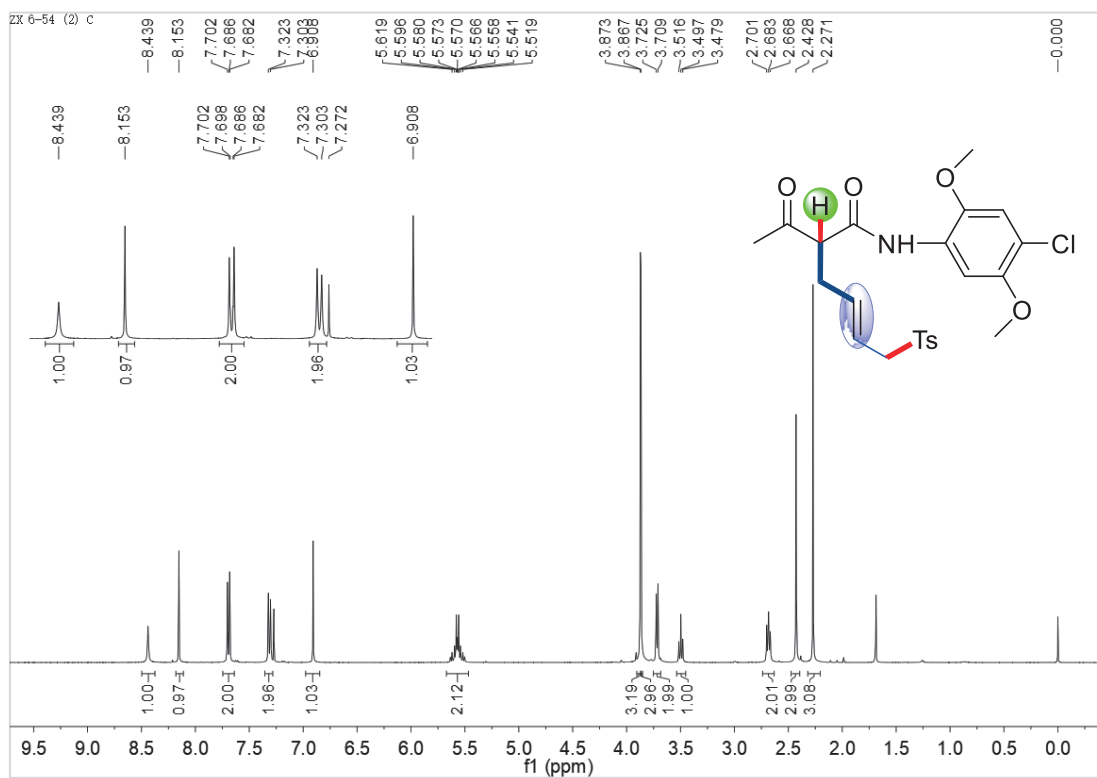

### 4h, <sup>13</sup>C NMR

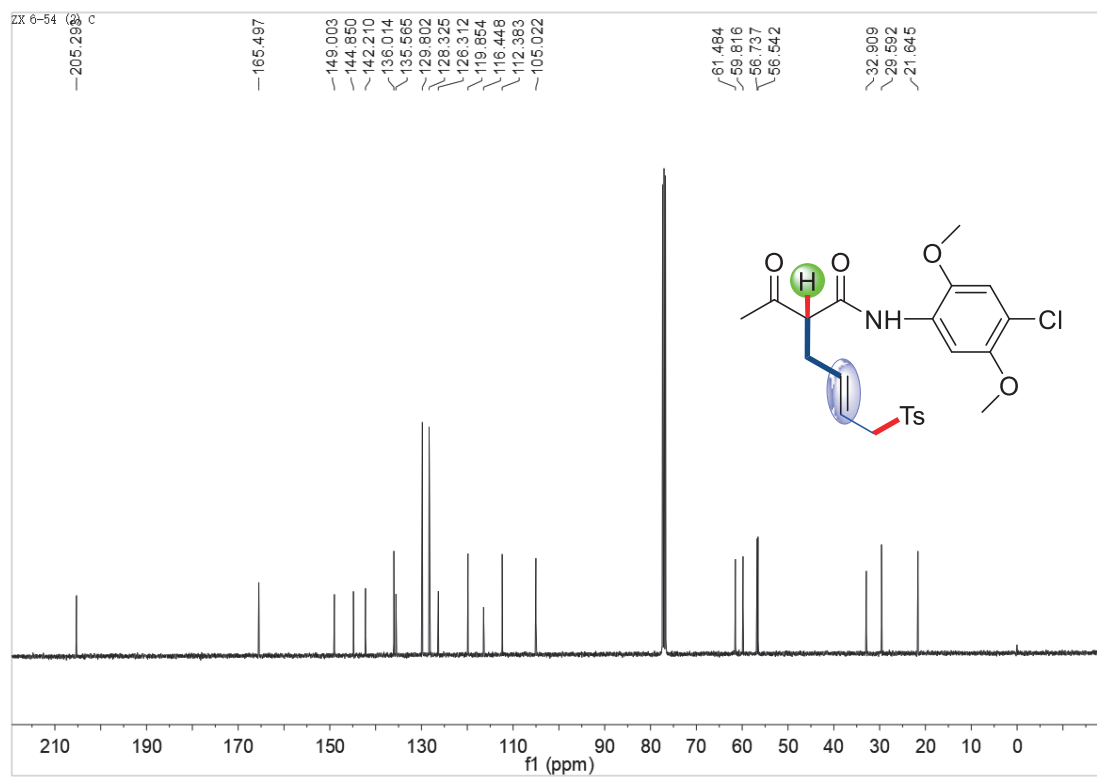



**4h**, DEPT 90 and DEPT 135

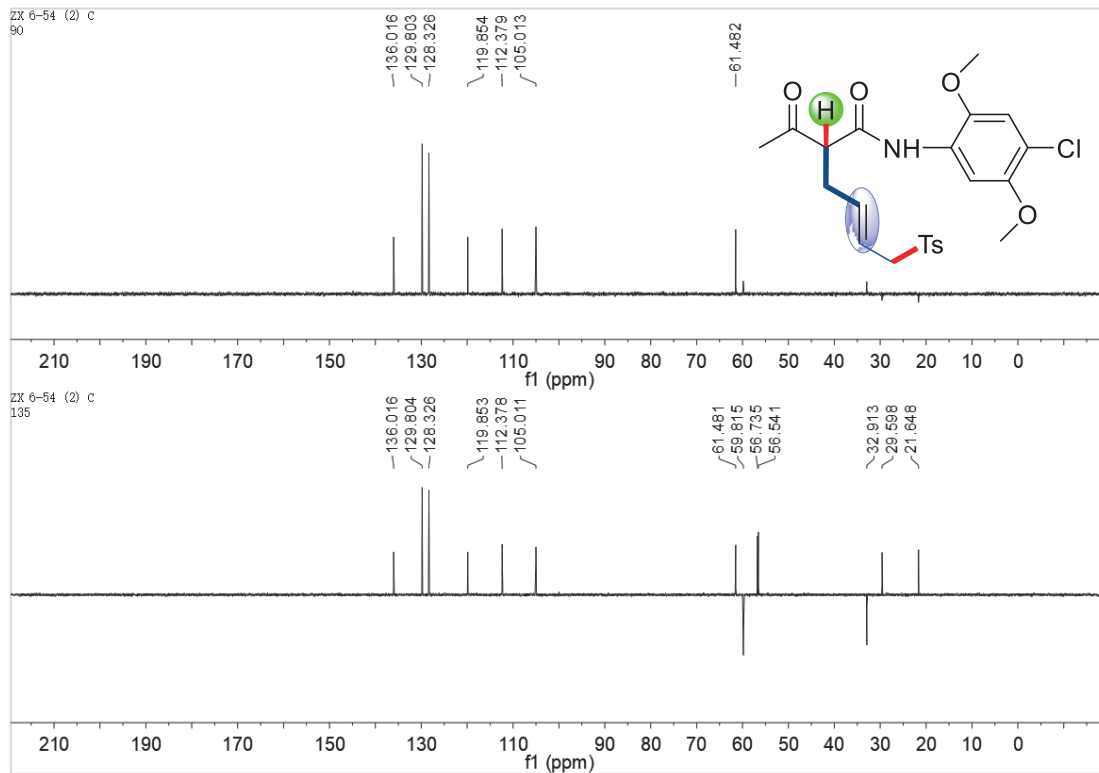

**4i**,  $^1\text{H}$  NMR

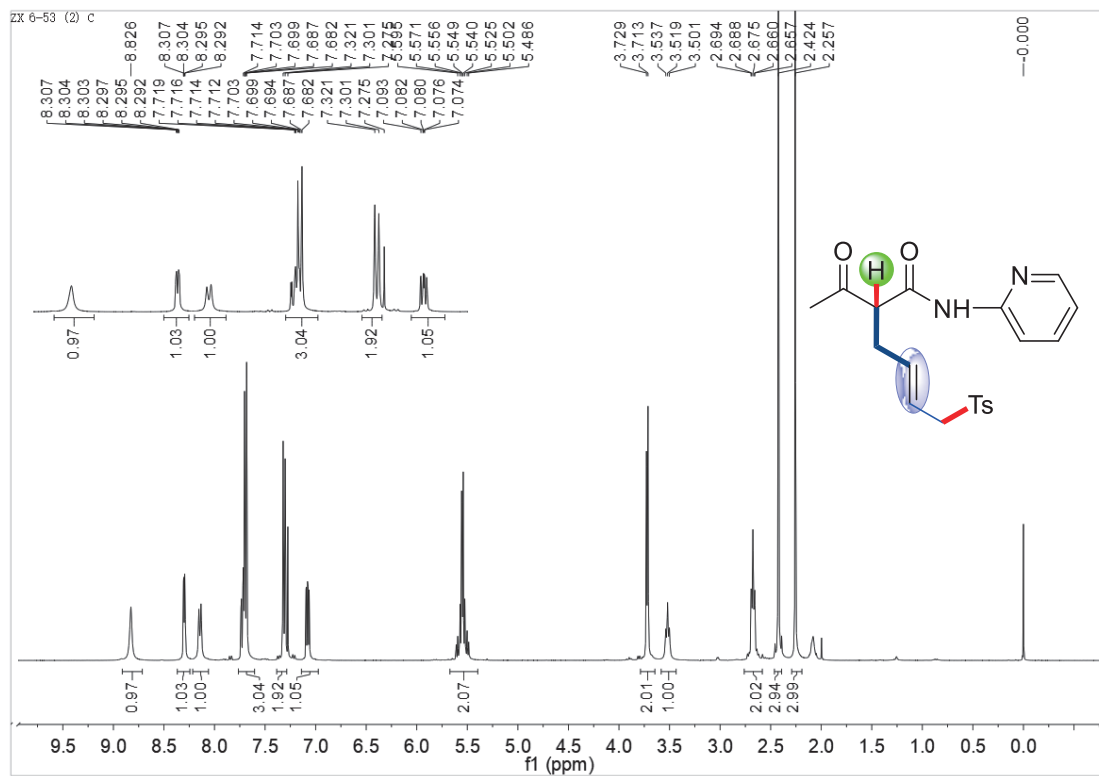

**4i**,  $^{13}\text{C}$  NMR

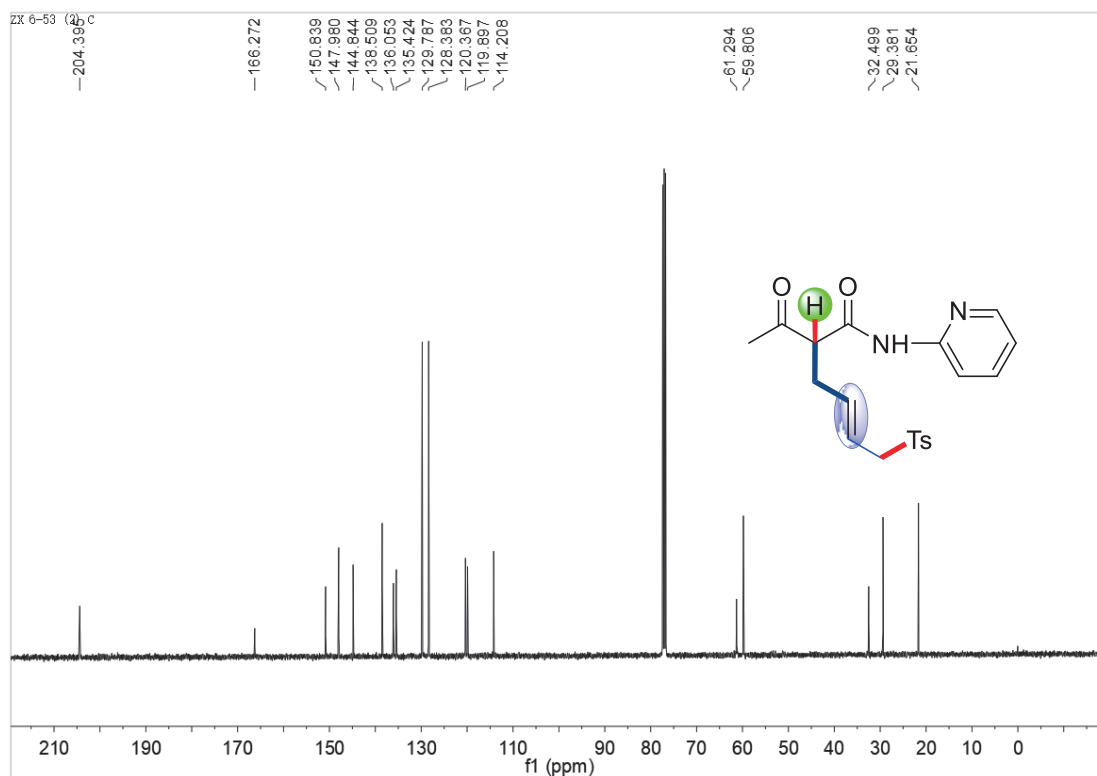

**4i**, DEPT 90 and DEPT 135

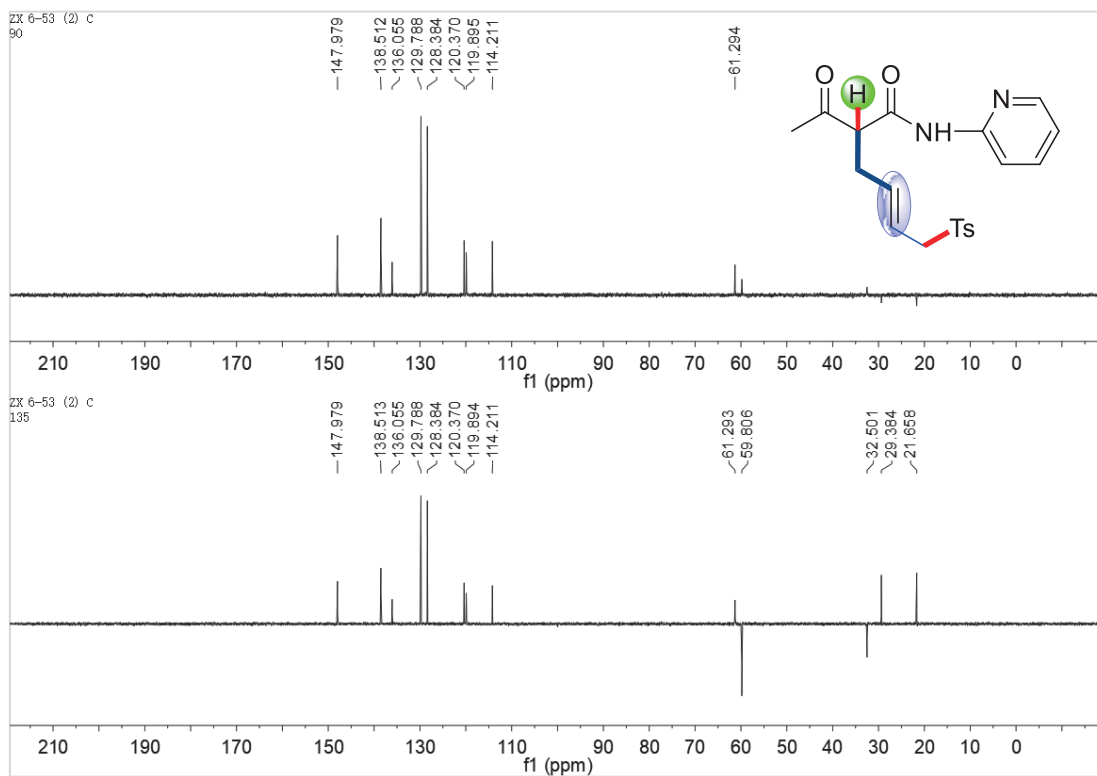

### 4j1, <sup>1</sup>H NMR

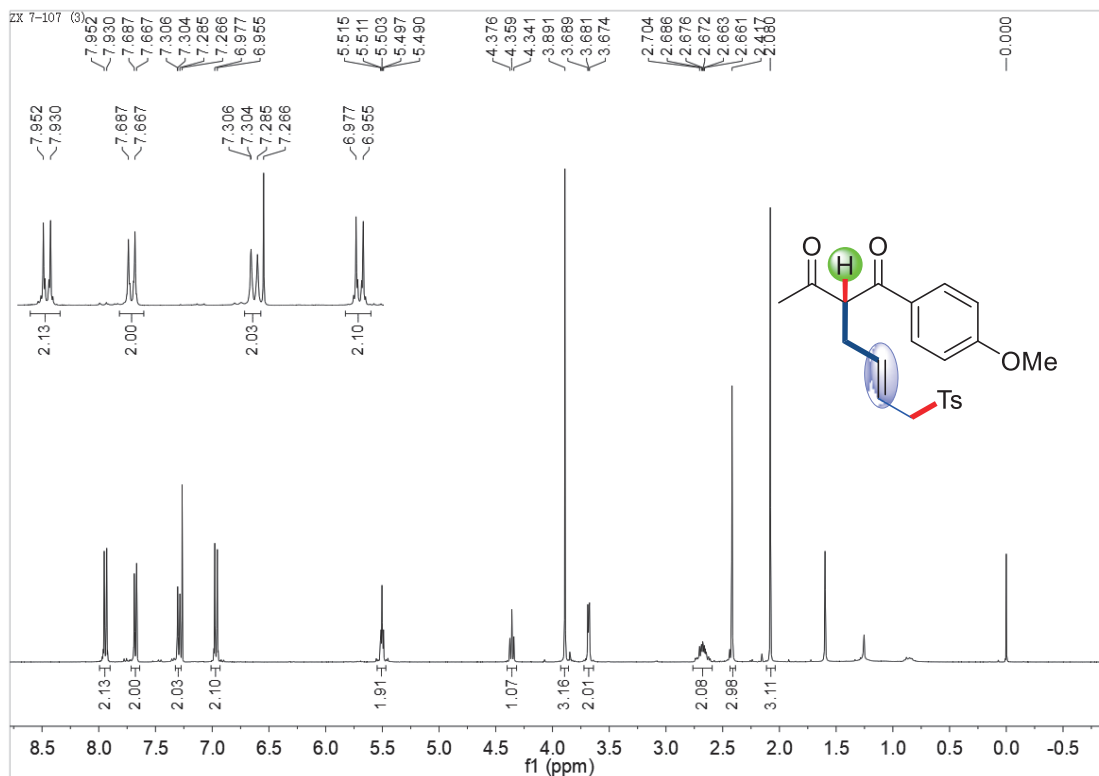

### 4j1, <sup>13</sup>C NMR

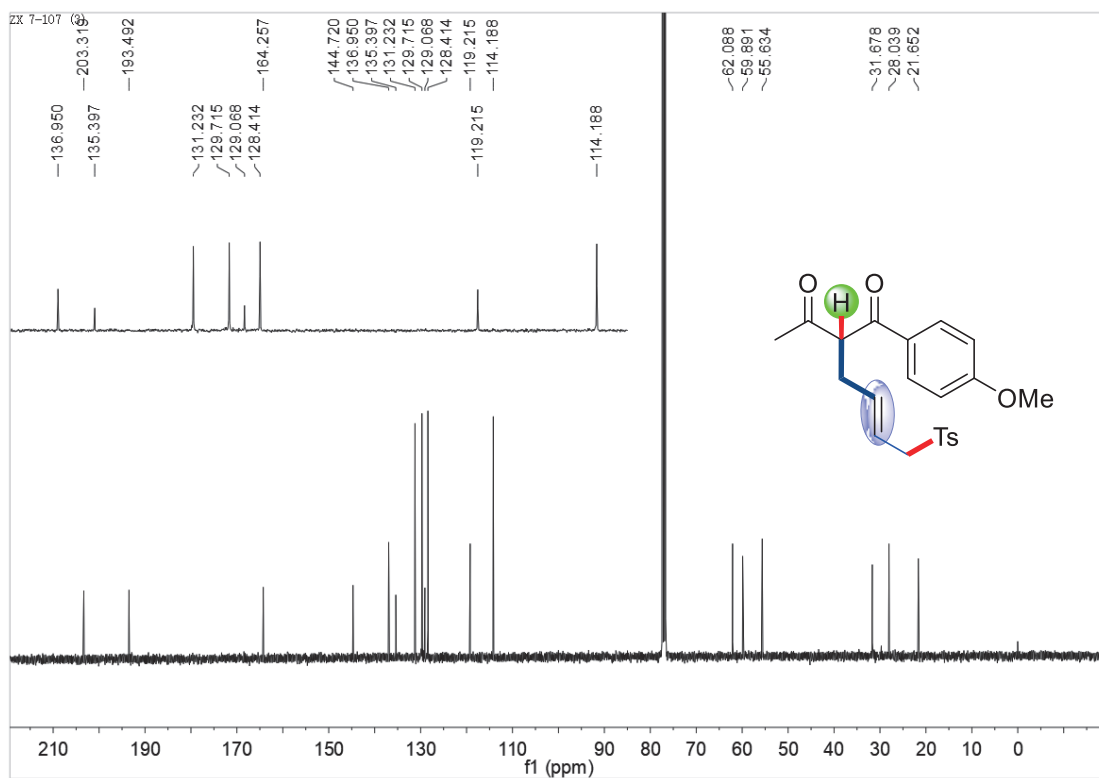

### 4j1, DEPT 90 and DEPT 135

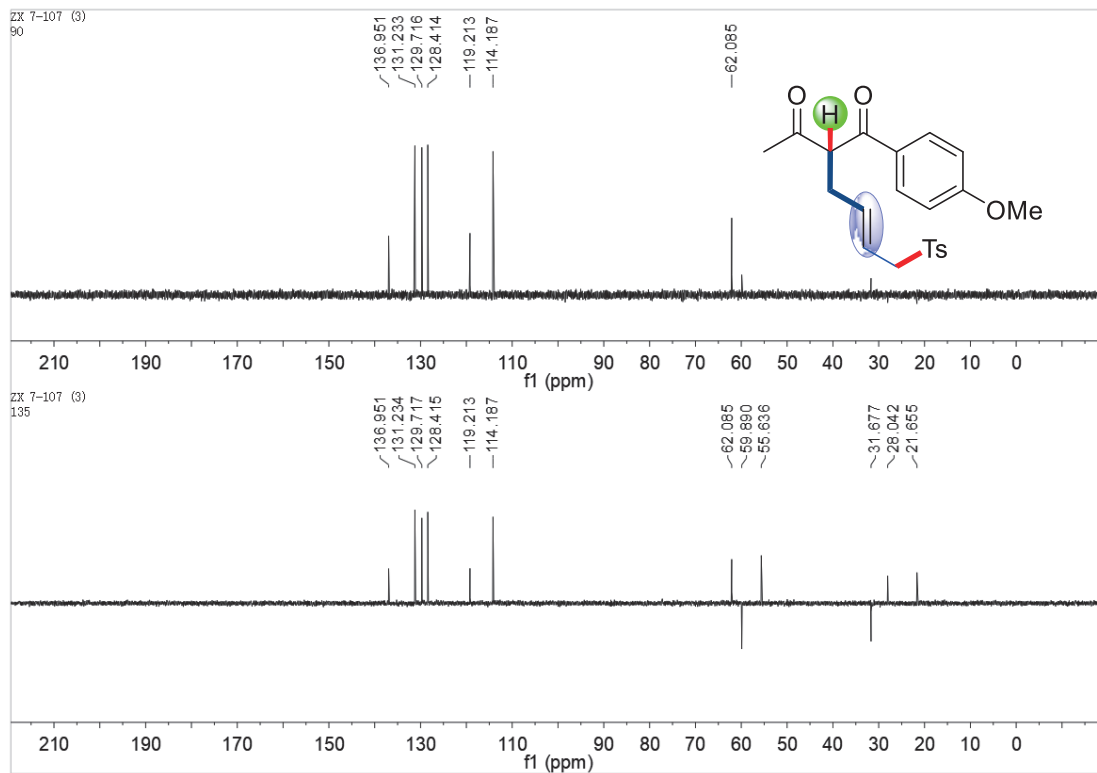

### 4j2, <sup>1</sup>H NMR

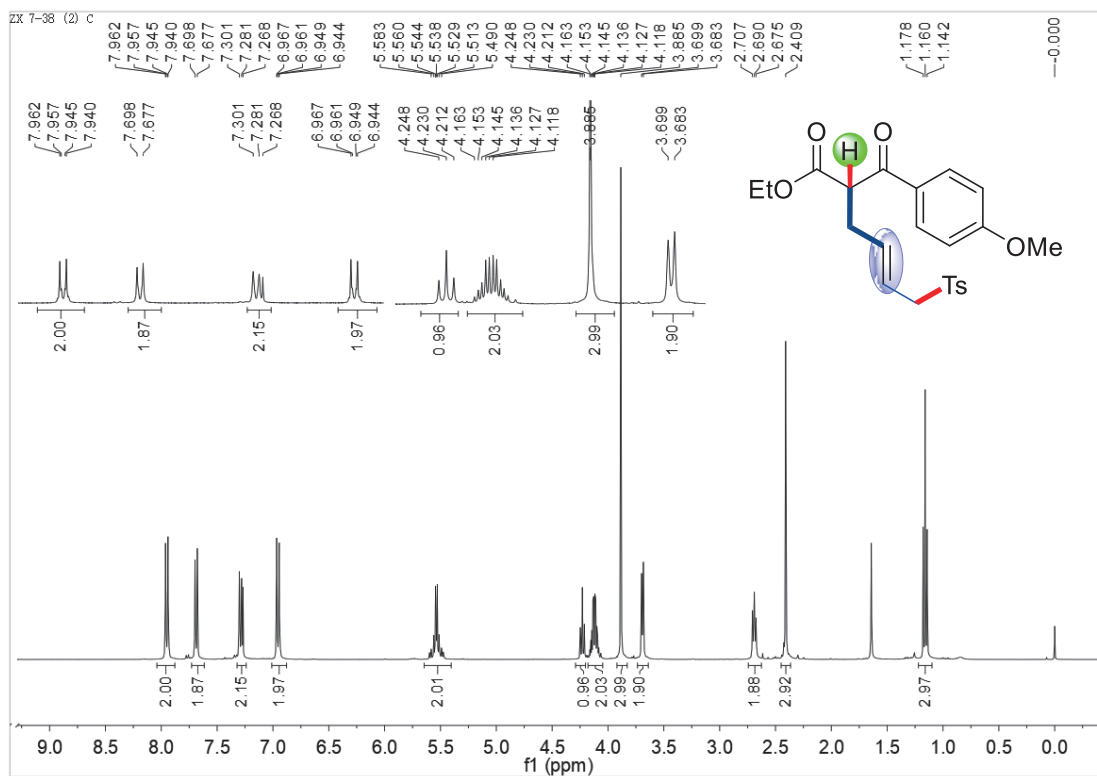

### 4j2, <sup>13</sup>C NMR

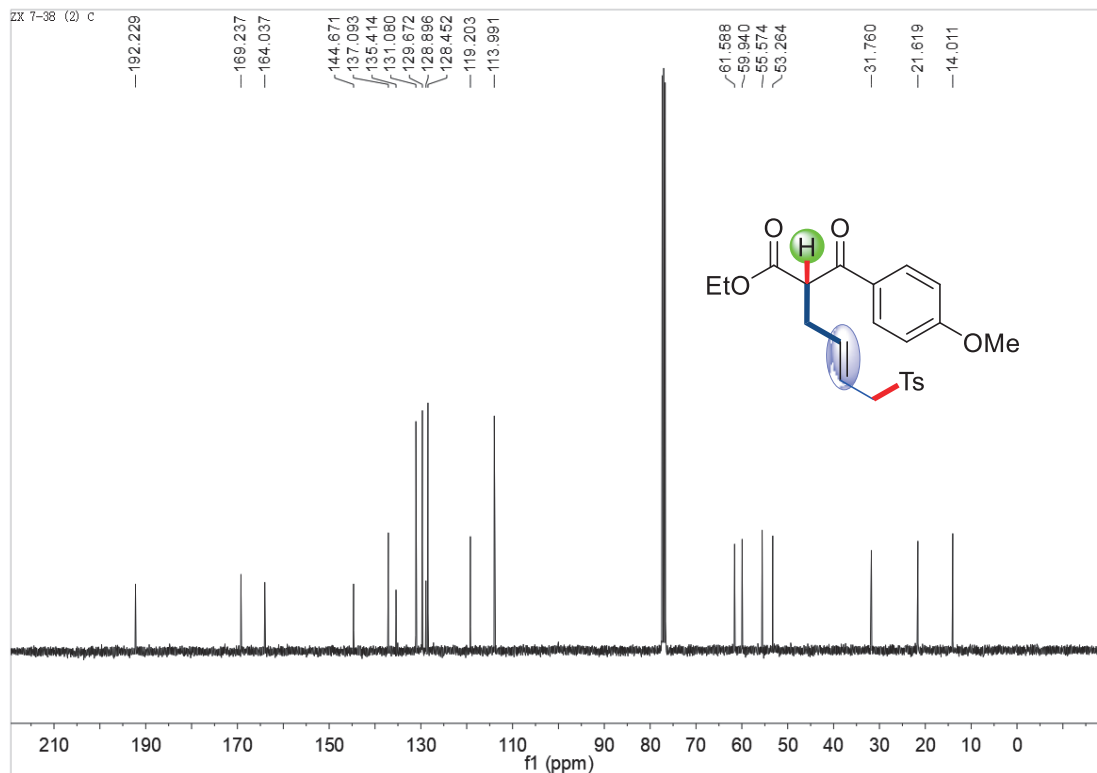

### 4j2, DEPT 90 and DEPT 135

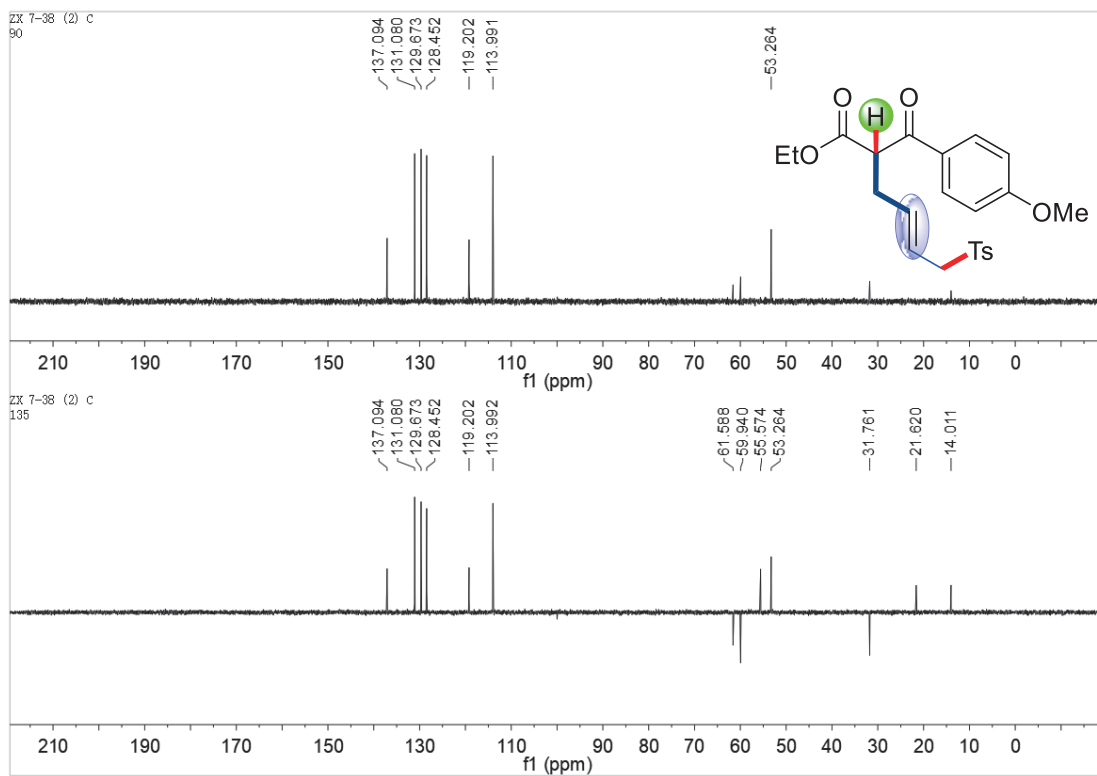

4k1, <sup>1</sup>H NMR

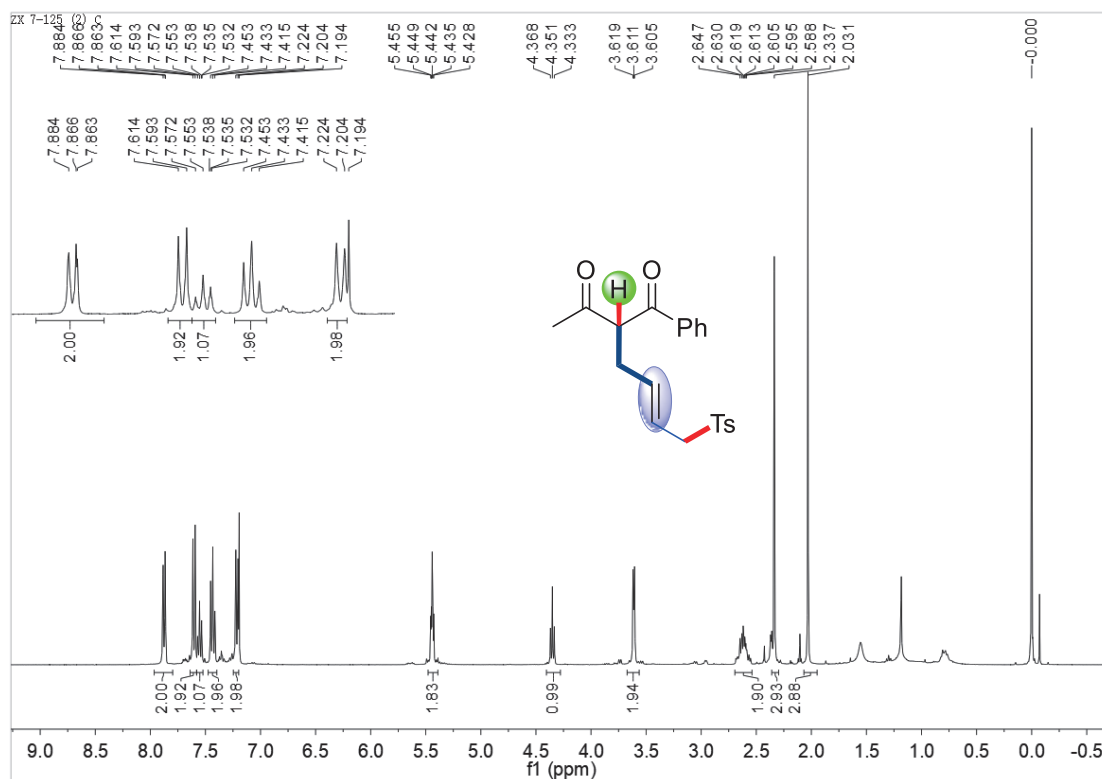

4k1, <sup>13</sup>C NMR

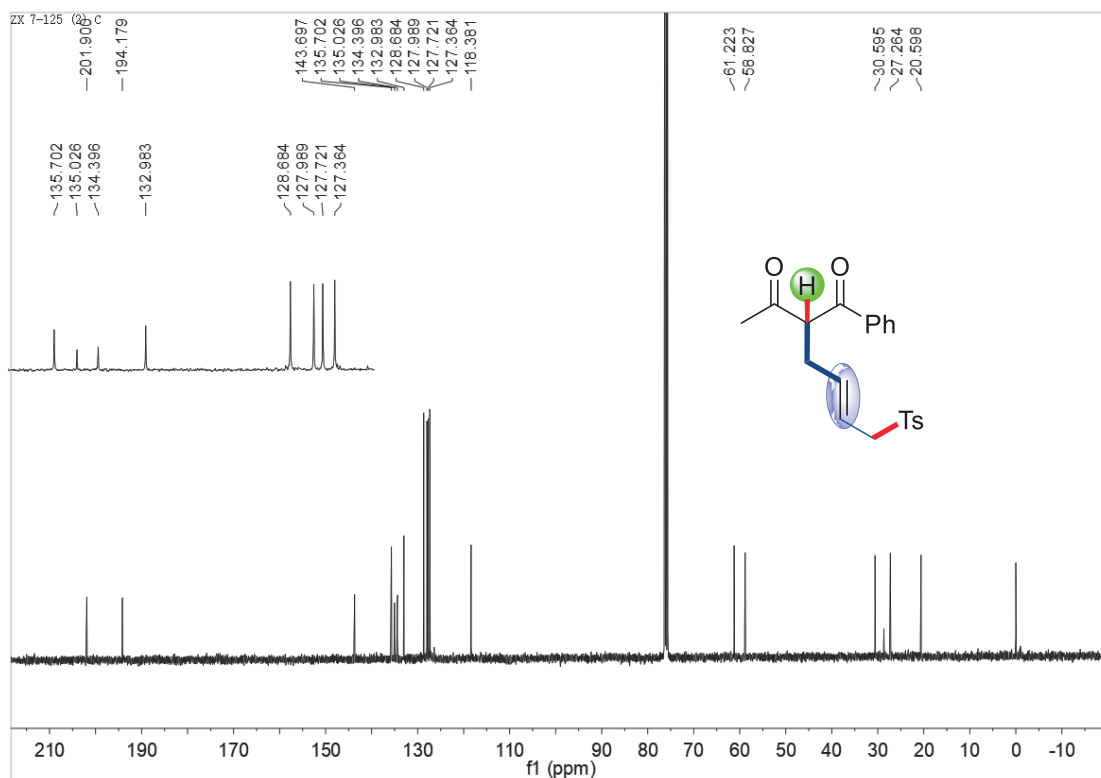

### 4k1, DEPT 90 and DEPT 135

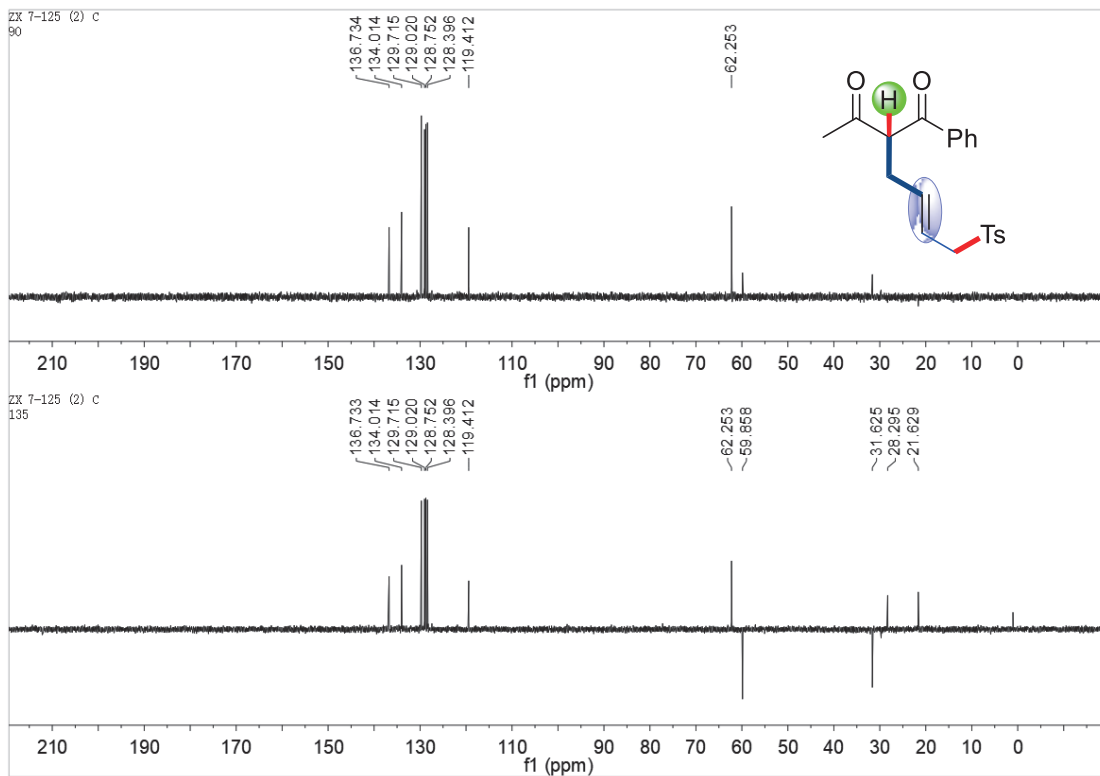

### 4k2, <sup>1</sup>H NMR

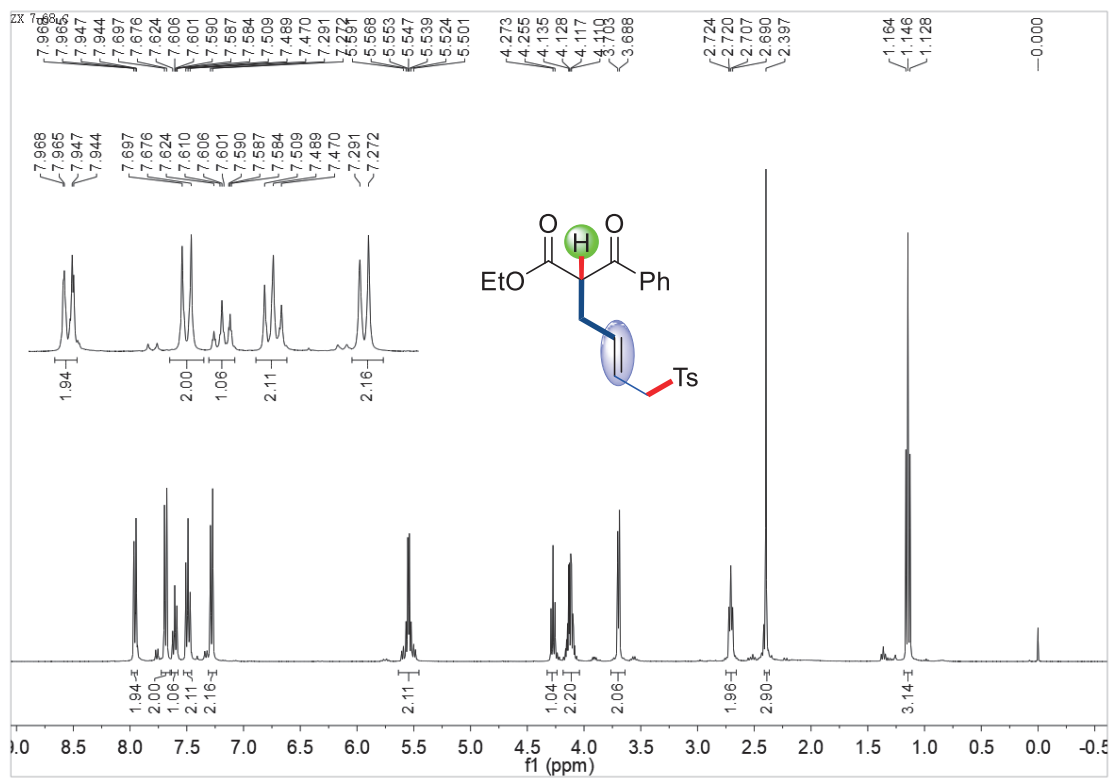

### 4k2, <sup>13</sup>C NMR

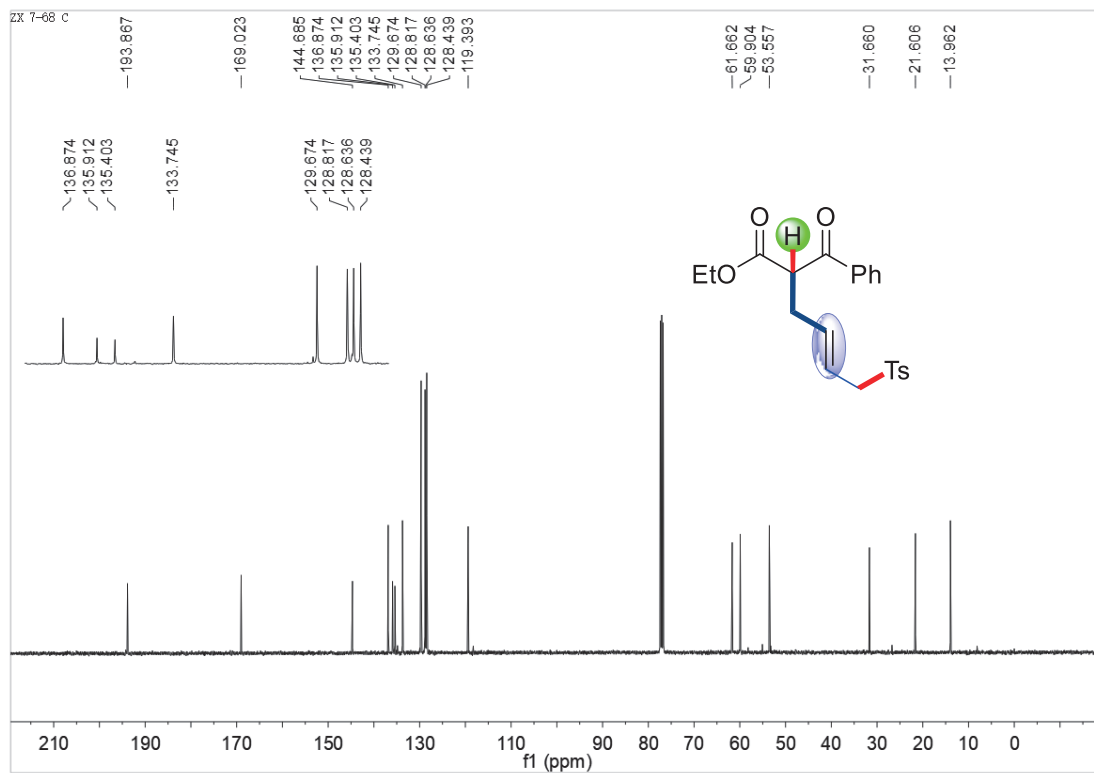

### 4k2, DEPT 90 and DEPT 135

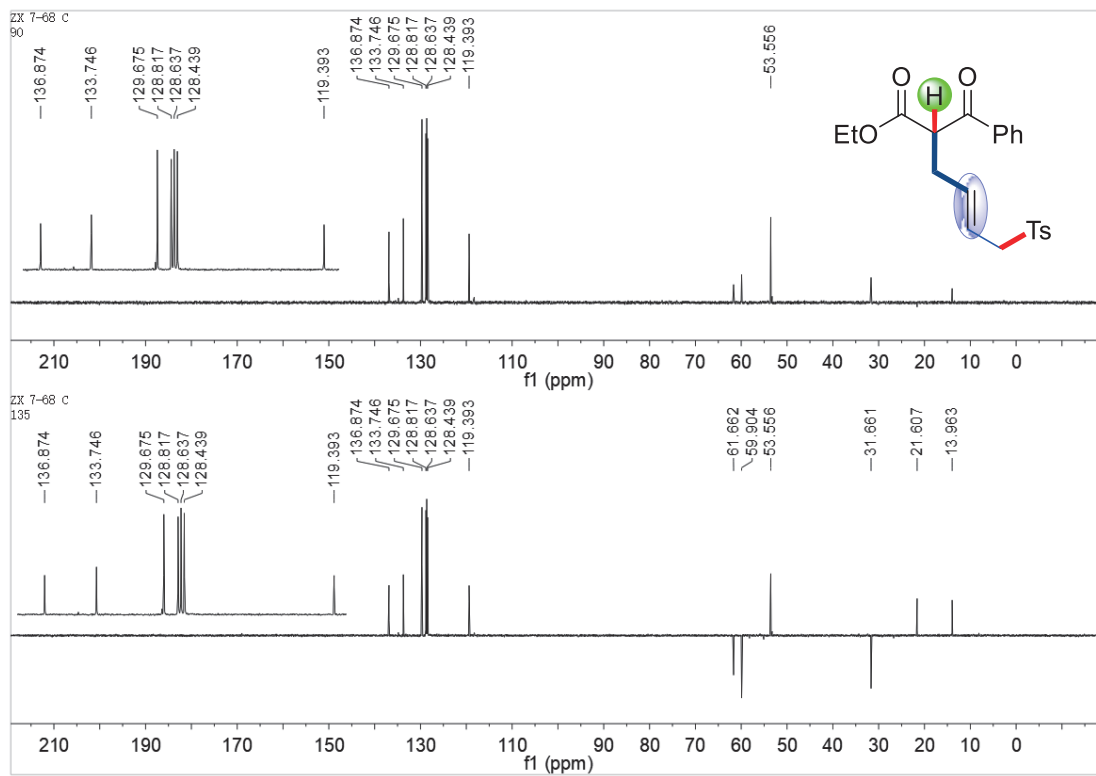



### 4k3, <sup>1</sup>H NMR

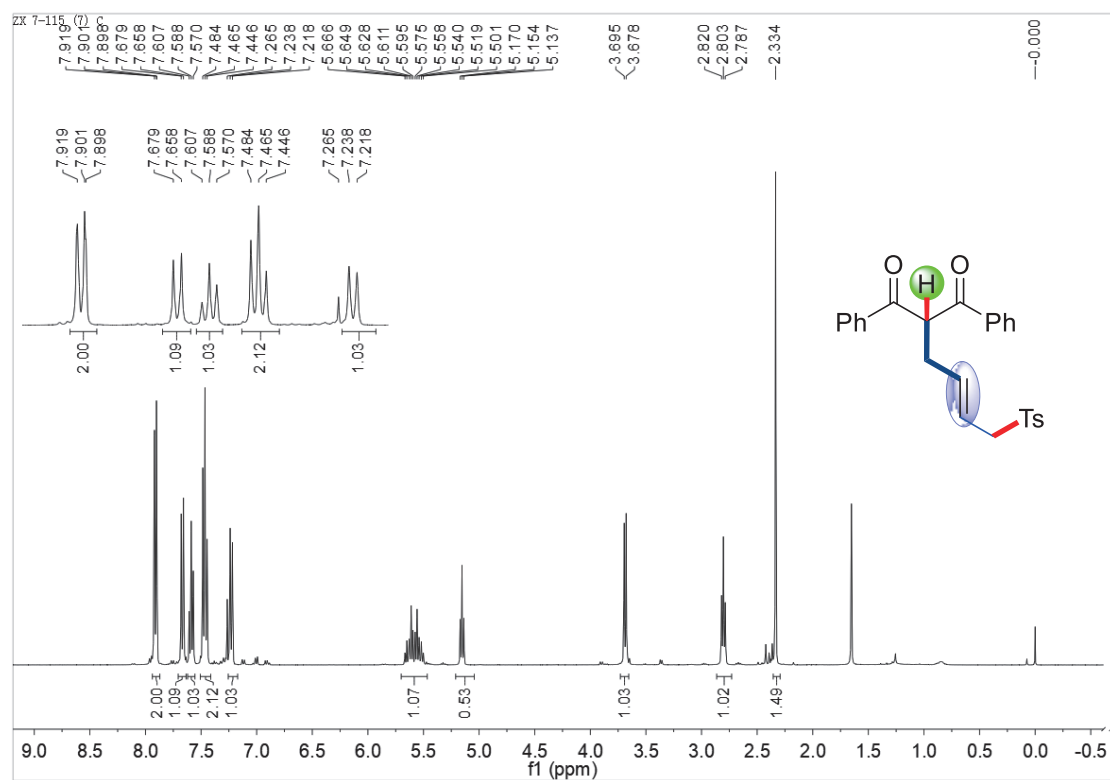

### 4k3, <sup>13</sup>C NMR

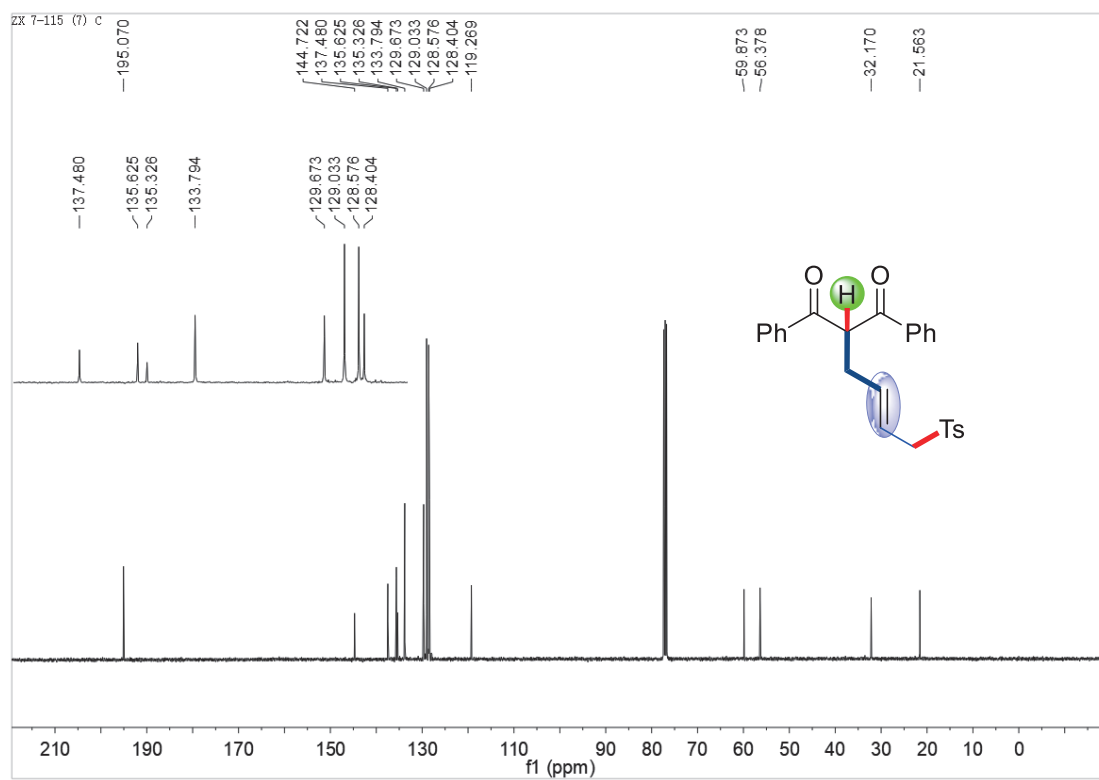

### 4k3, DEPT 90 and DEPT 135

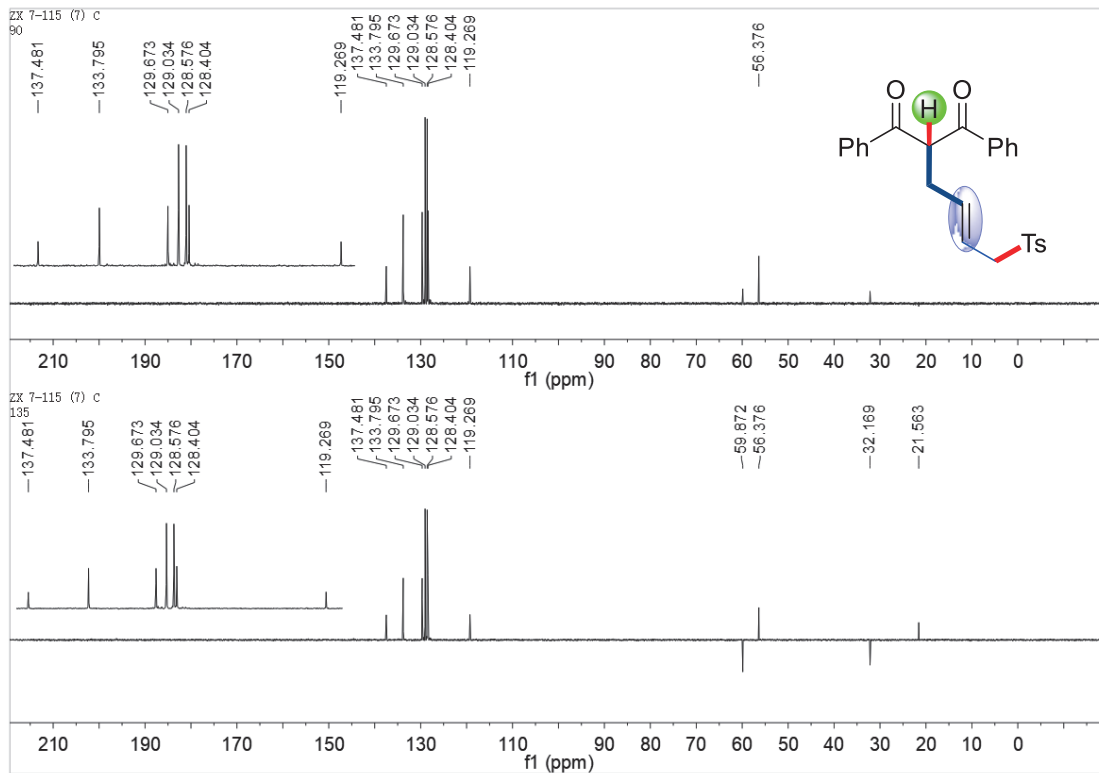

### 4k4, <sup>1</sup>H NMR

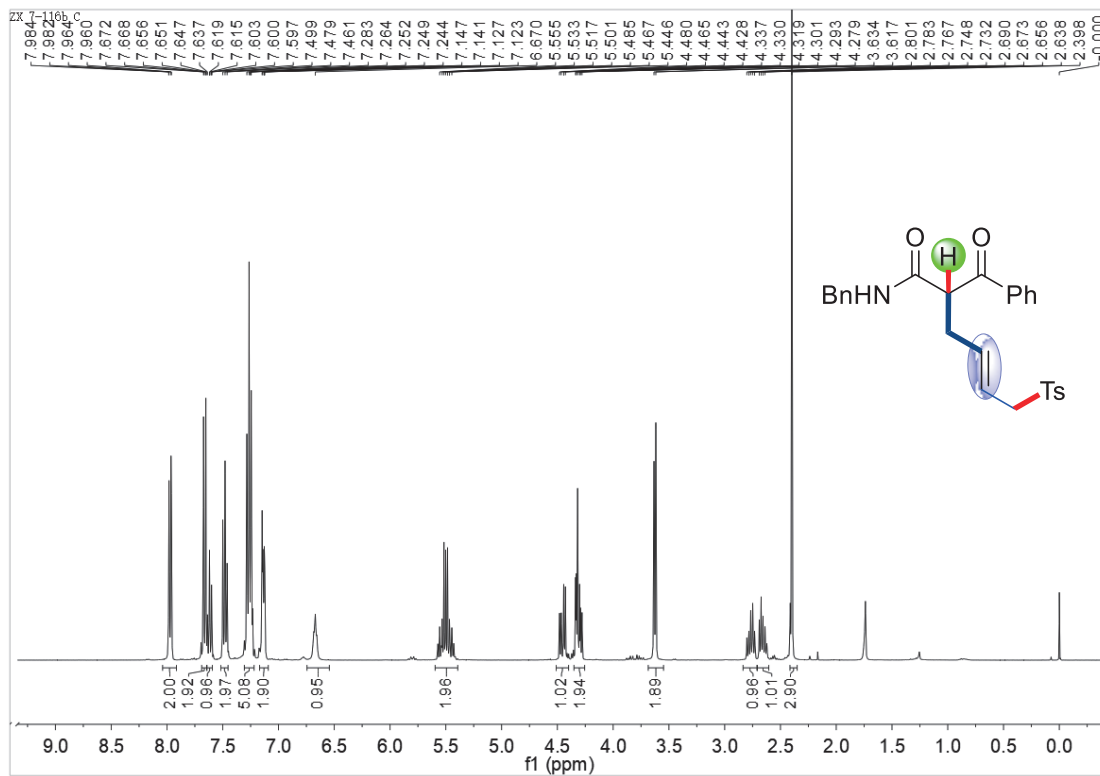

### 4k4, <sup>13</sup>C NMR

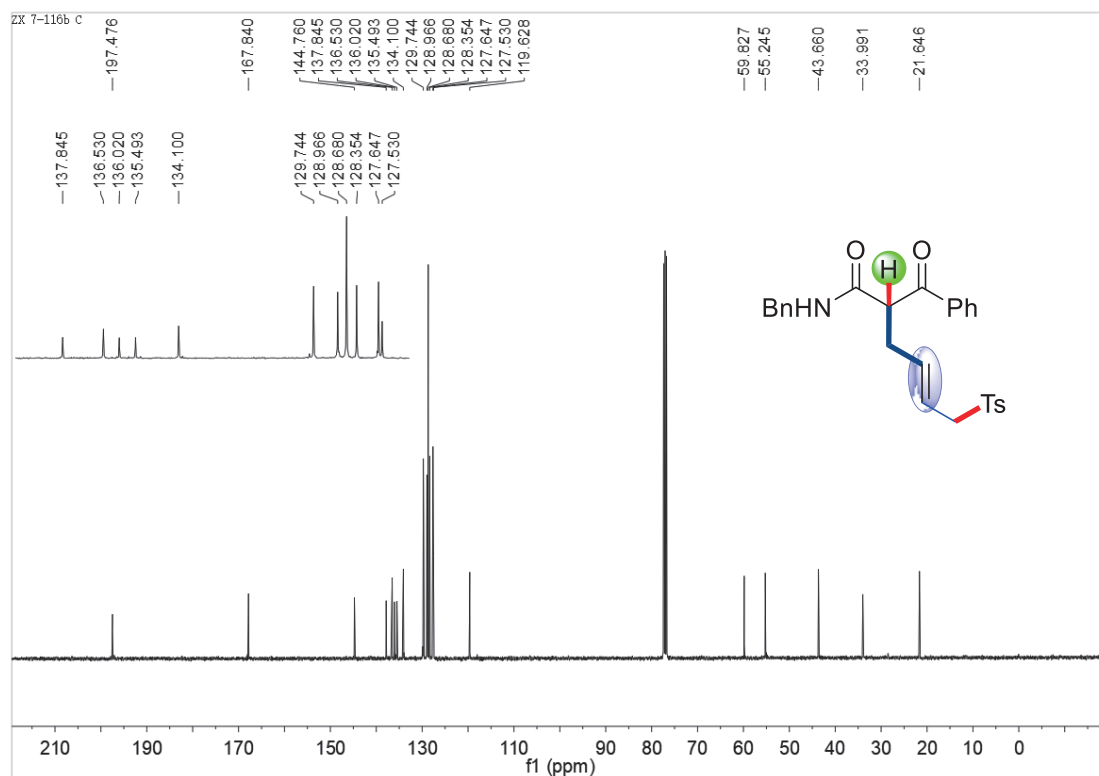

### 4k4, DEPT 90 and DEPT 135

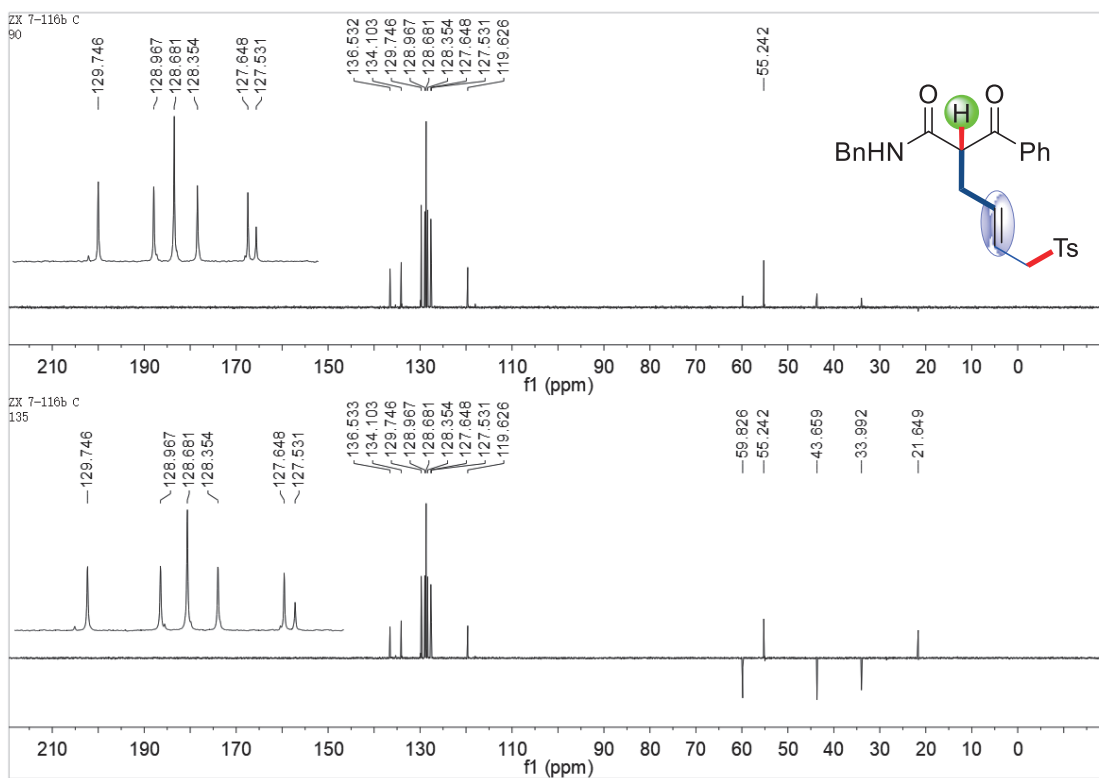

### 4k5, <sup>1</sup>H NMR

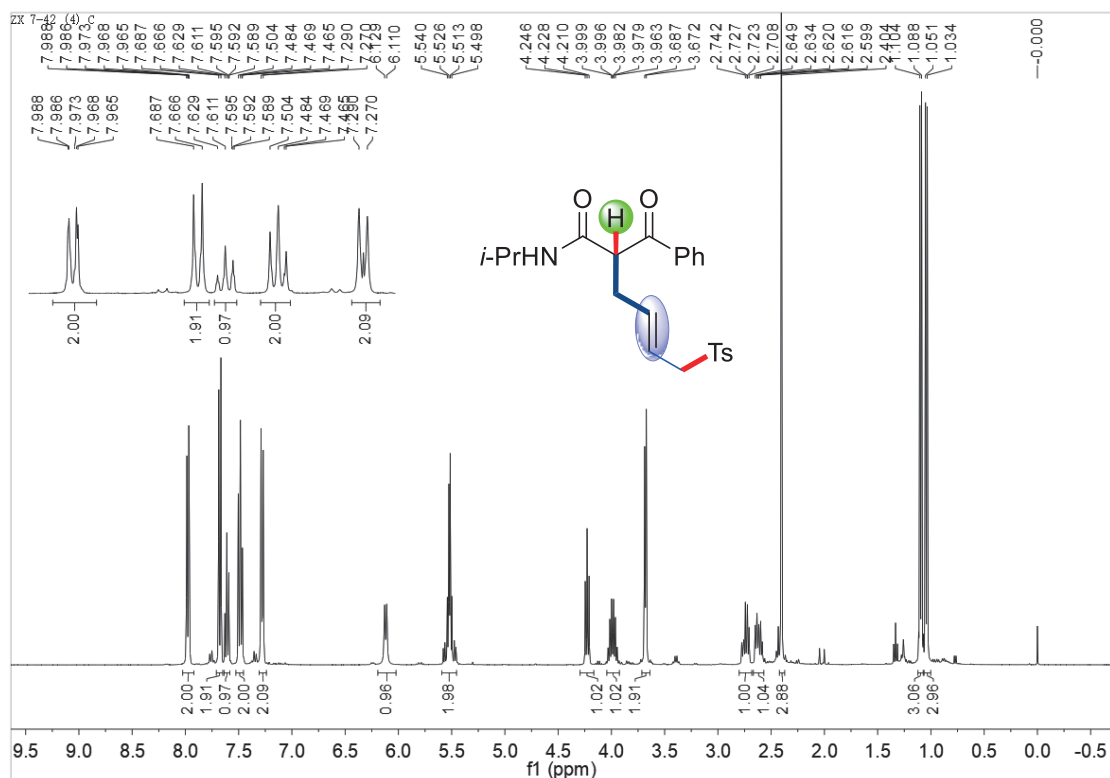

### 4k5, <sup>13</sup>C NMR

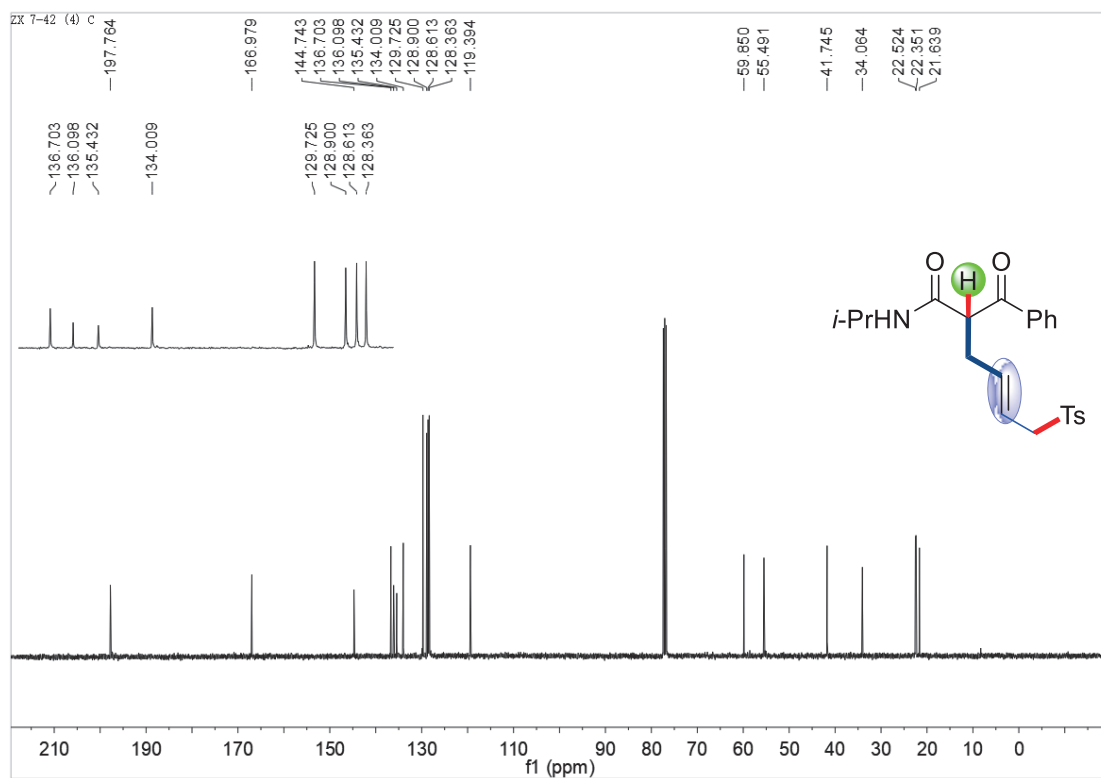

### 4k5, DEPT 90 and DEPT 135

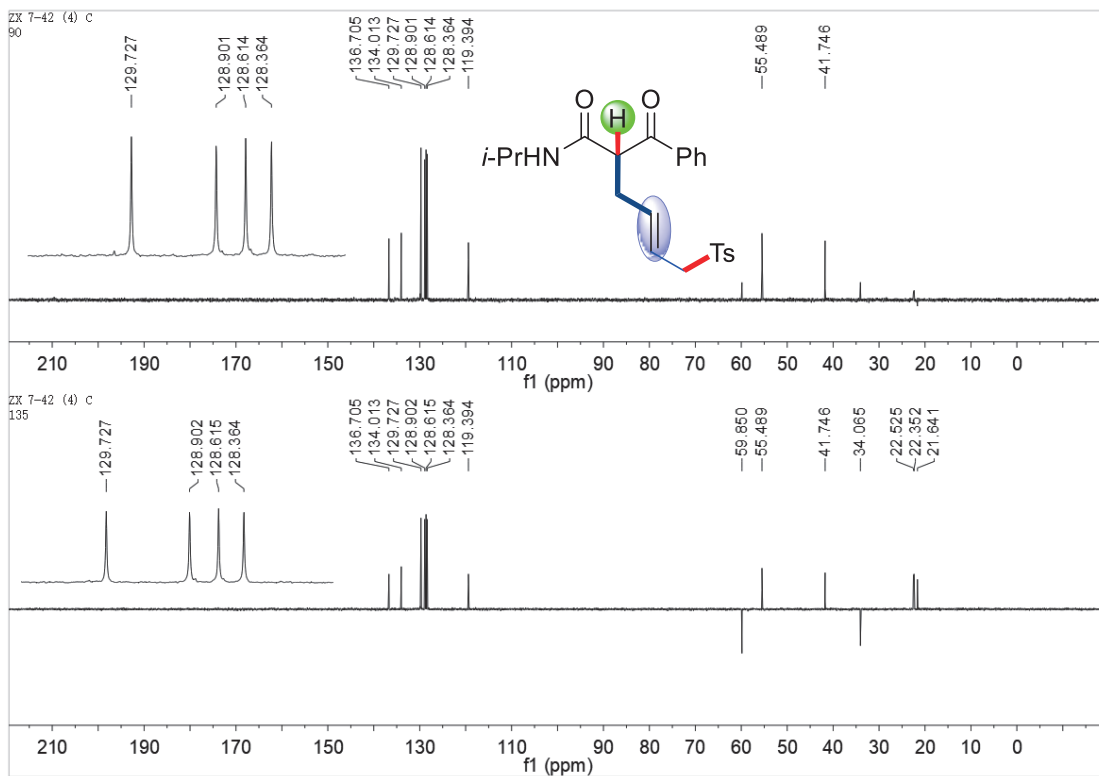

### 4l, <sup>1</sup>H NMR

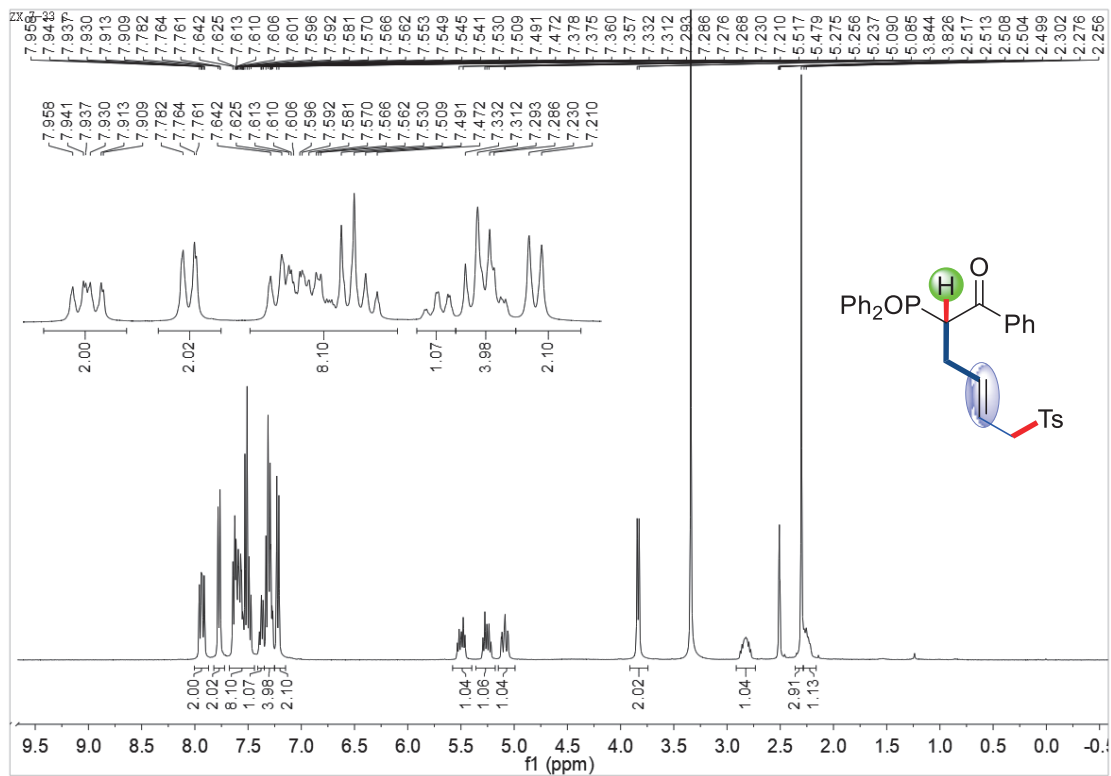

### 4l, <sup>13</sup>C NMR

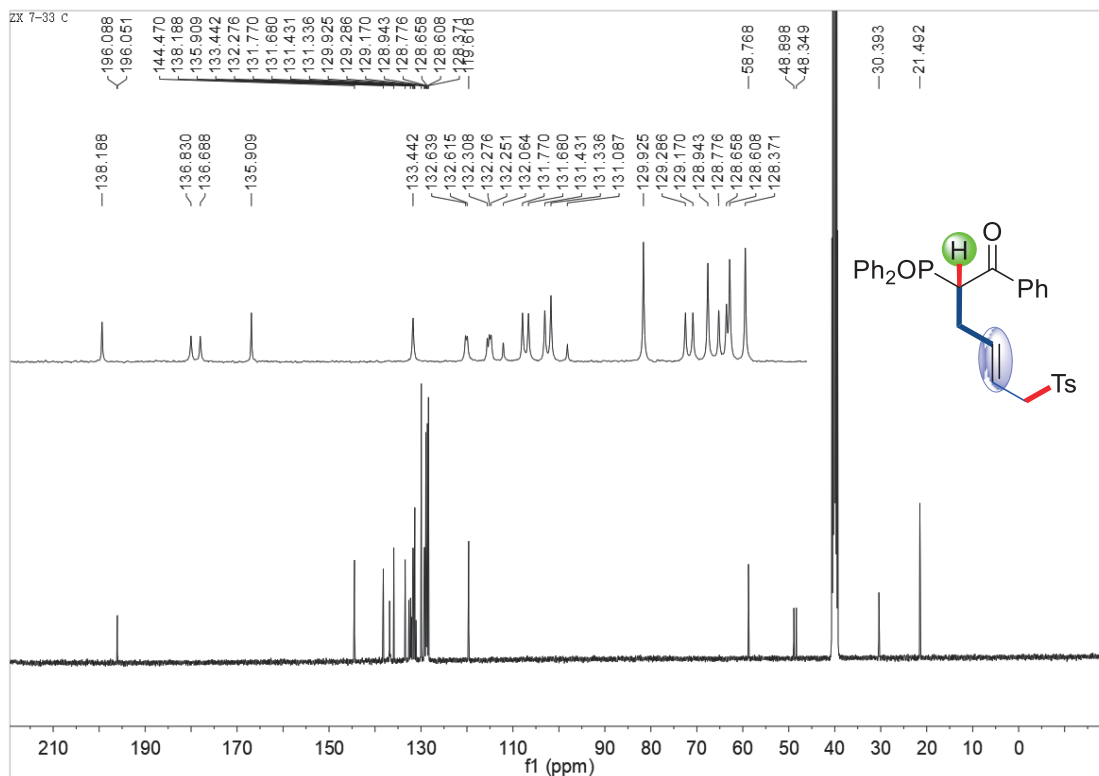

### 4l, DEPT 90 and DEPT 135

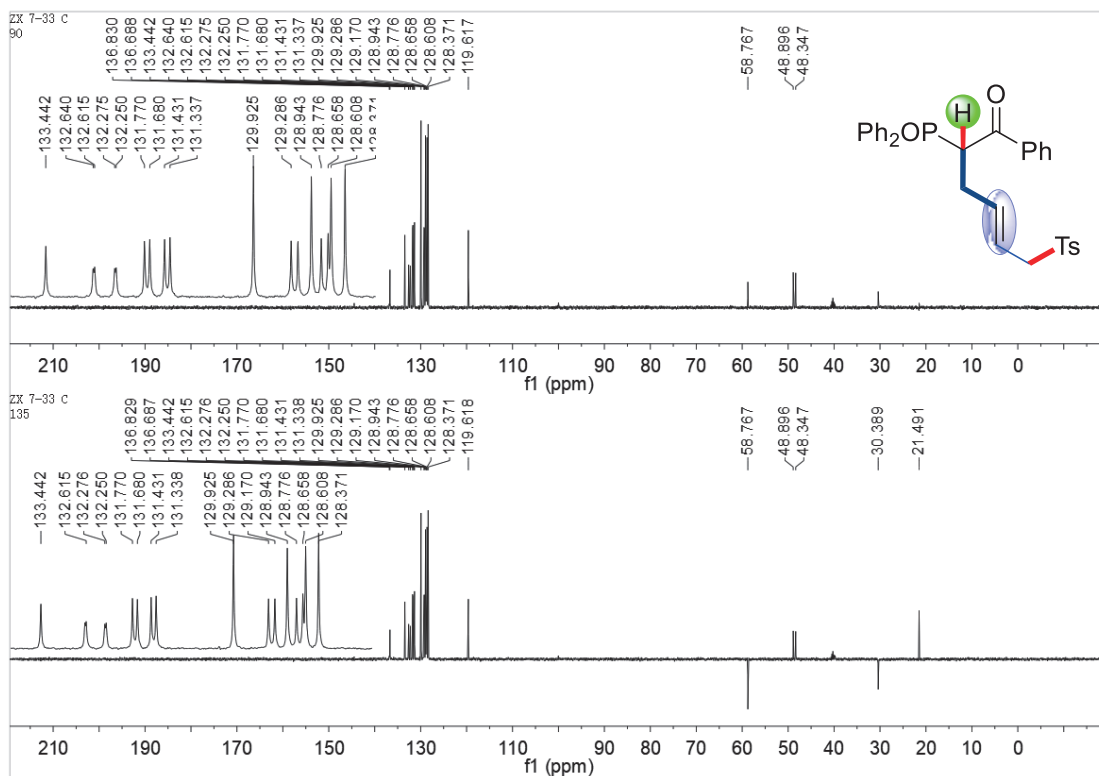

### 4l, <sup>31</sup>P NMR

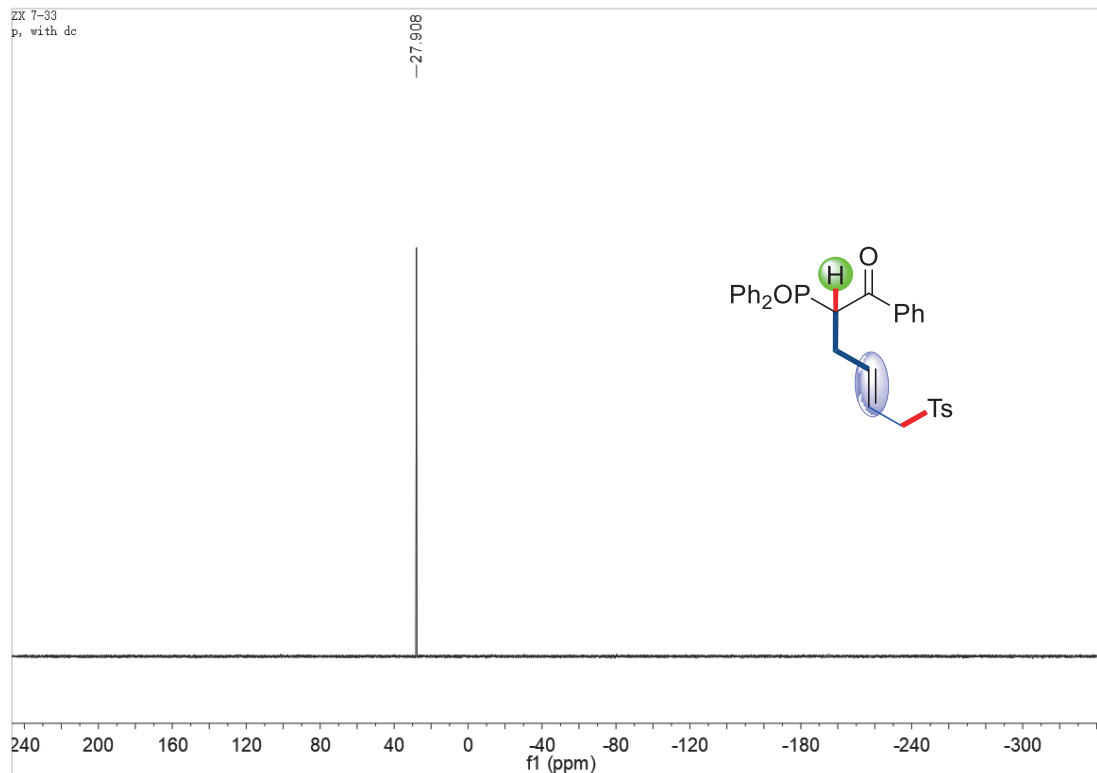

### 4m, <sup>1</sup>H NMR

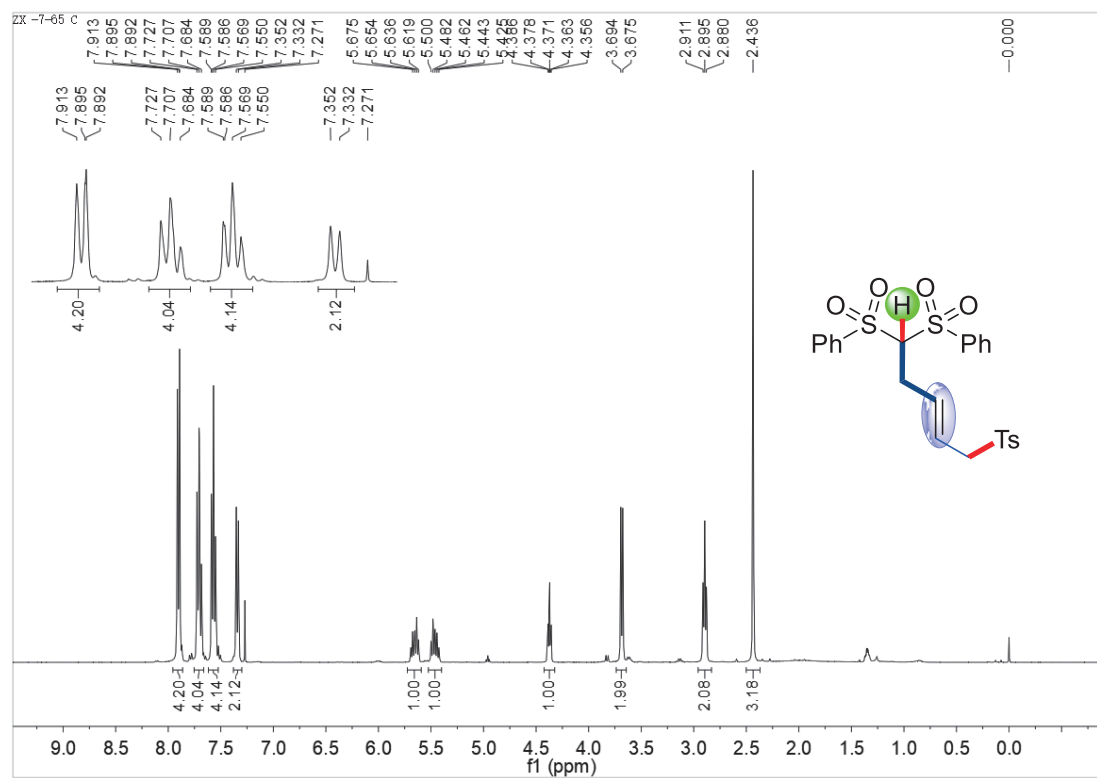

### 4m, <sup>13</sup>C NMR

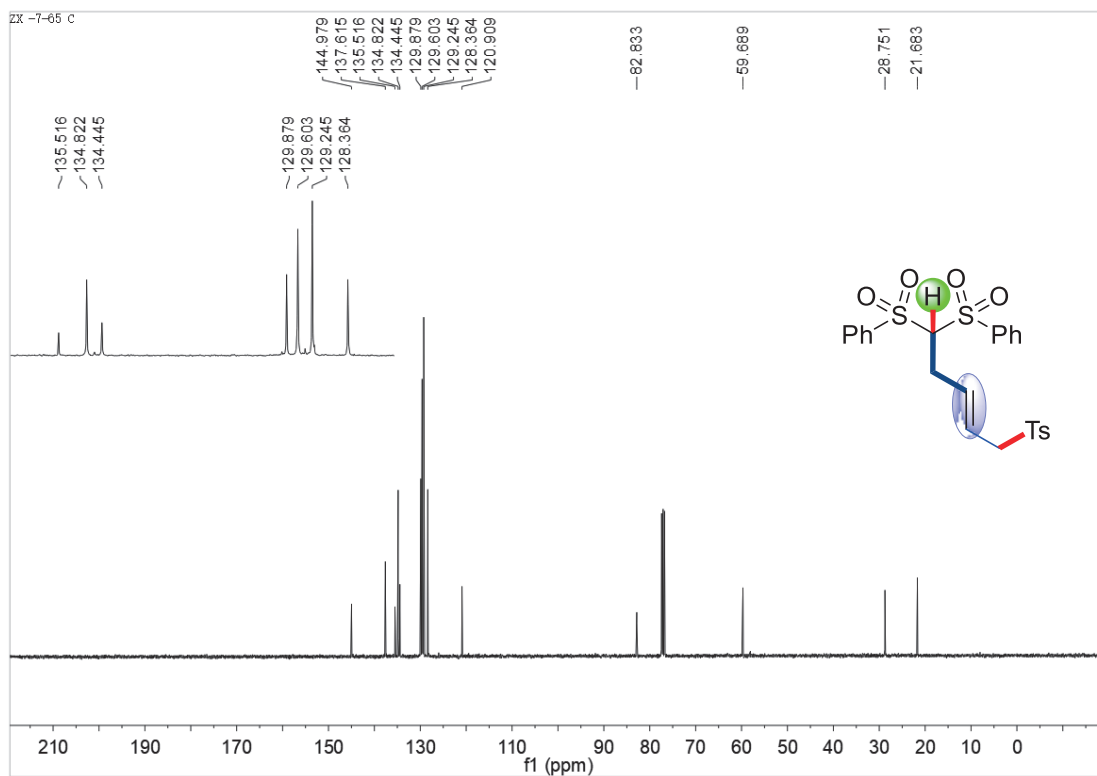

### 4m, DEPT 90 and DEPT 135

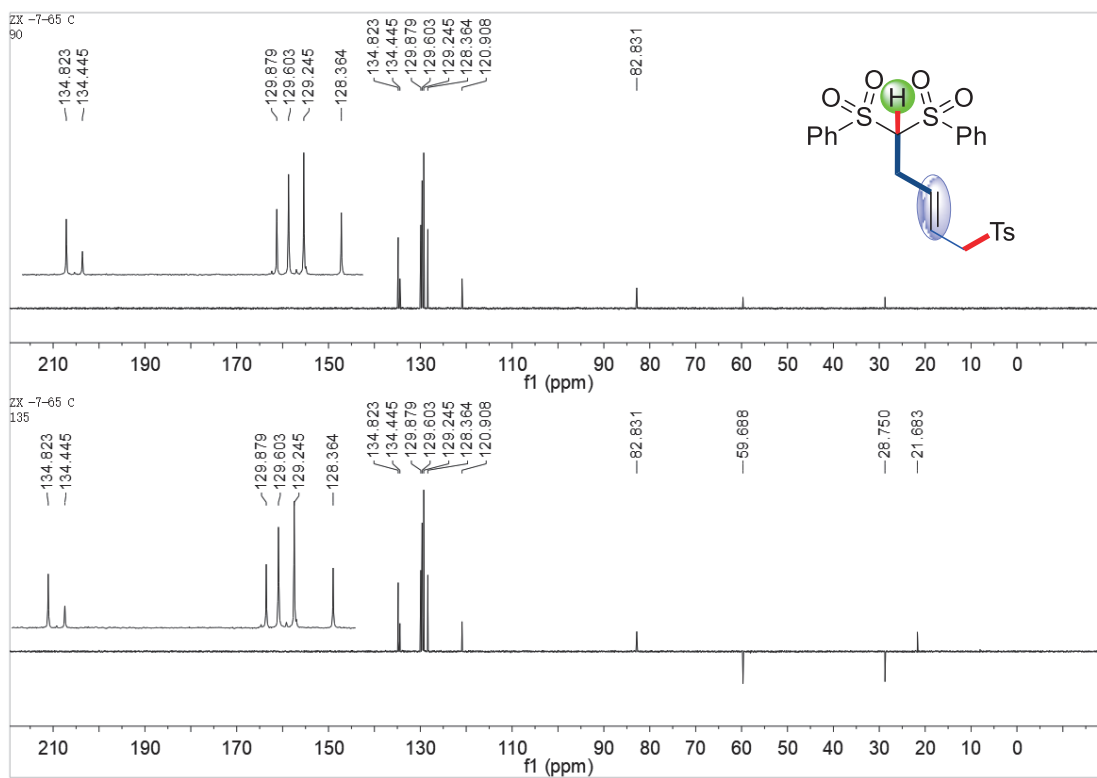



### 4n, <sup>1</sup>H NMR

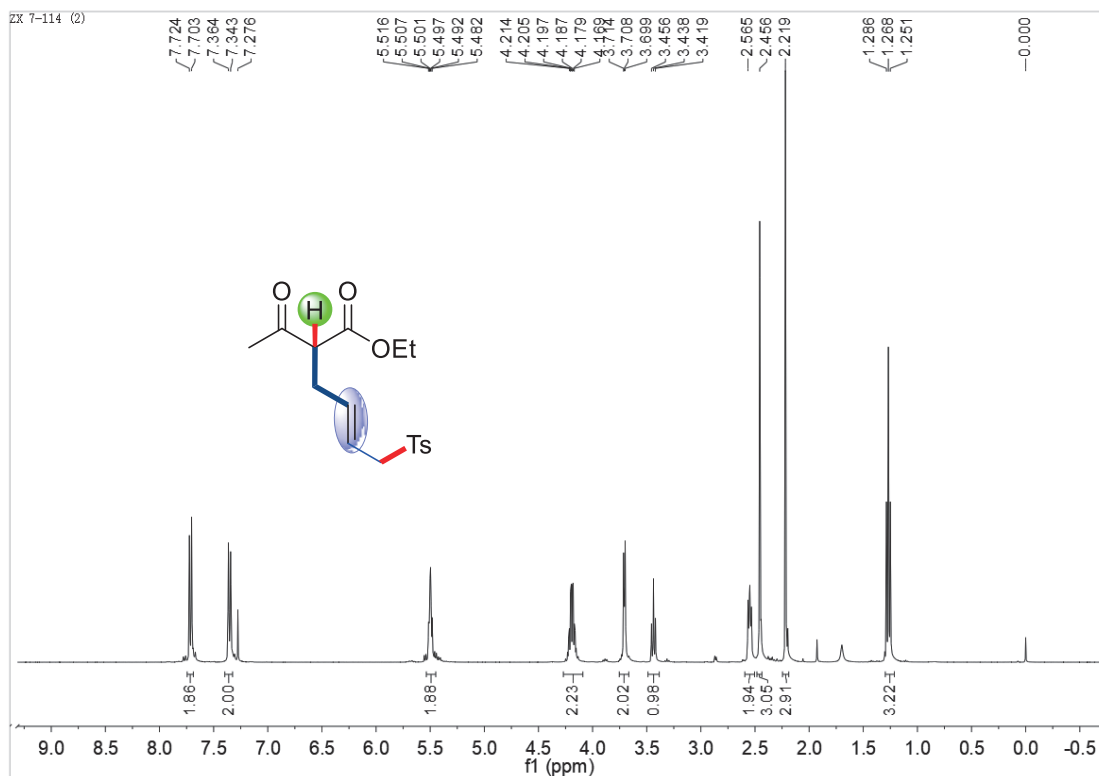

### 4n, <sup>13</sup>C NMR

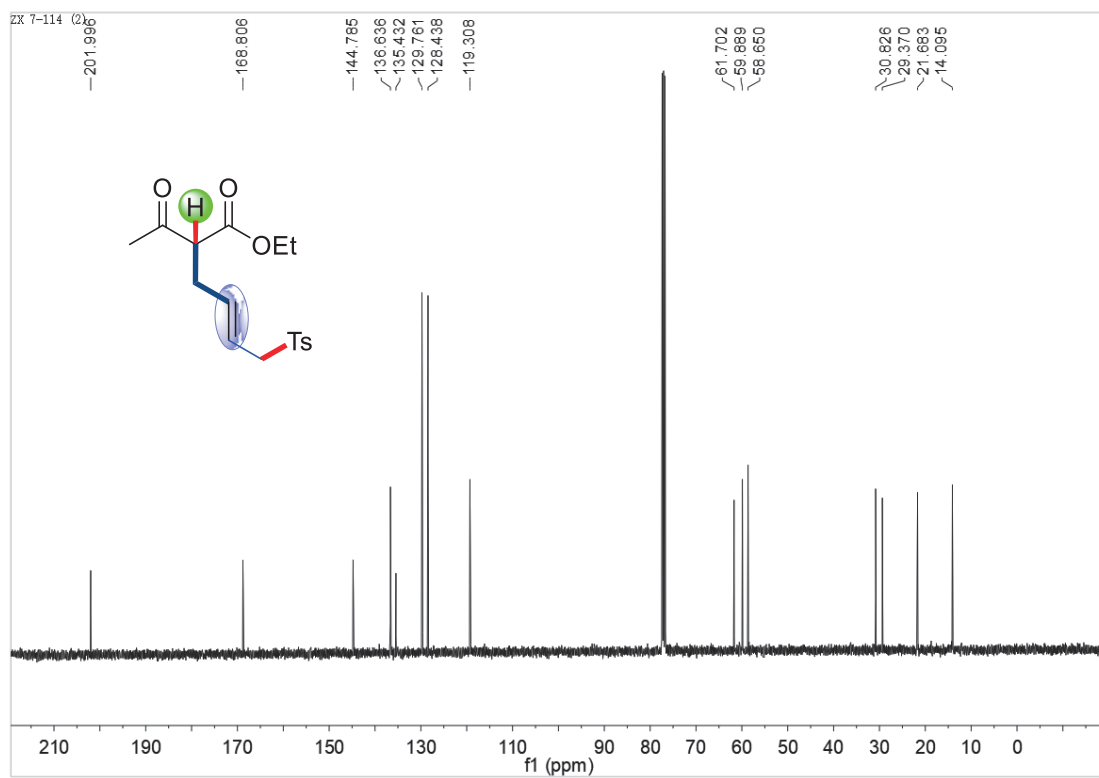

### 4n, DEPT 90 and DEPT 135

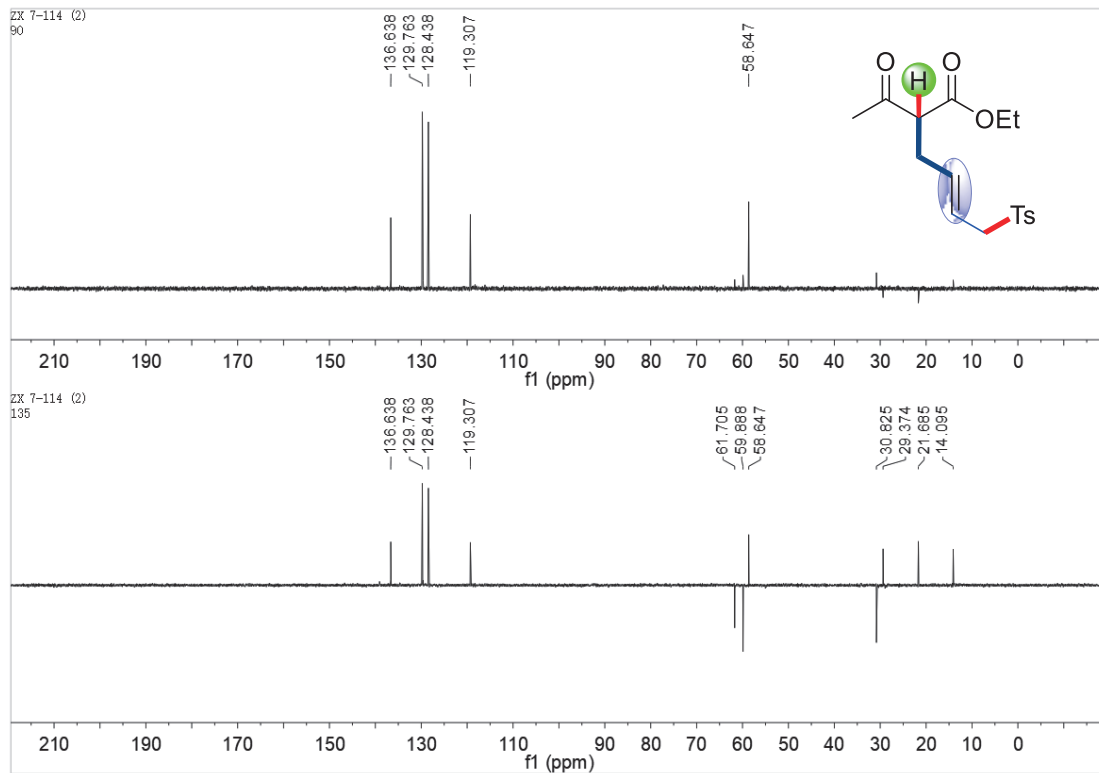

### 4o, <sup>1</sup>H NMR

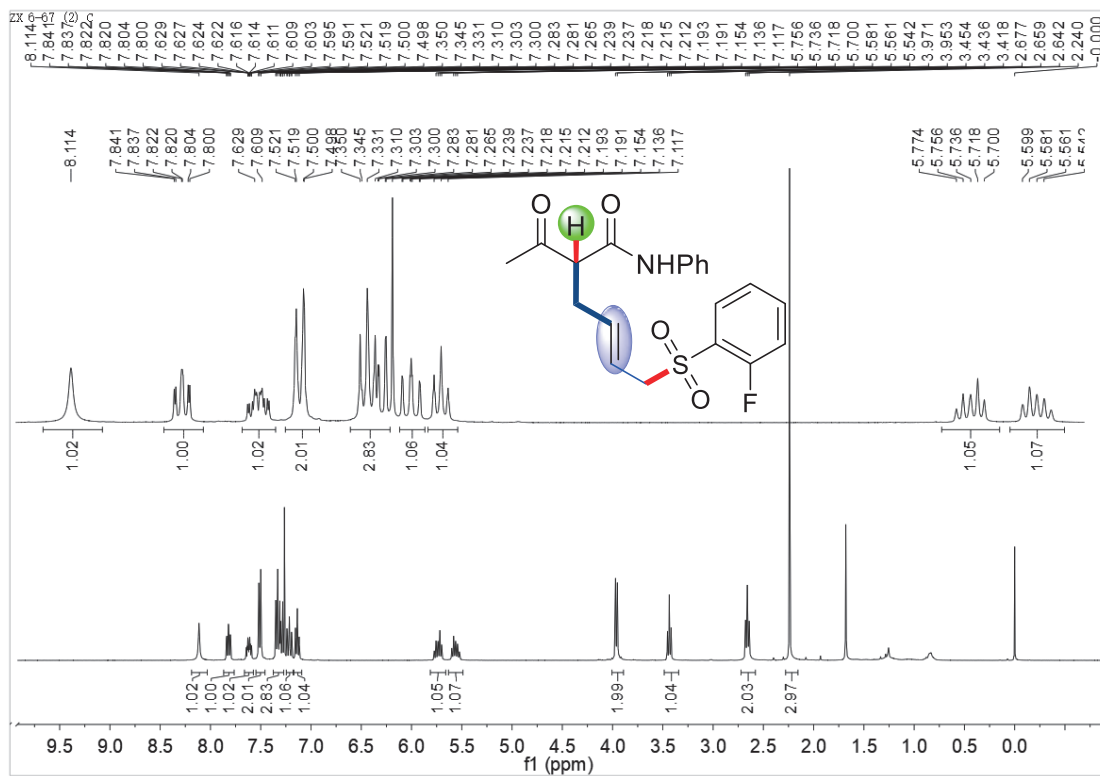

### 40, <sup>13</sup>C NMR

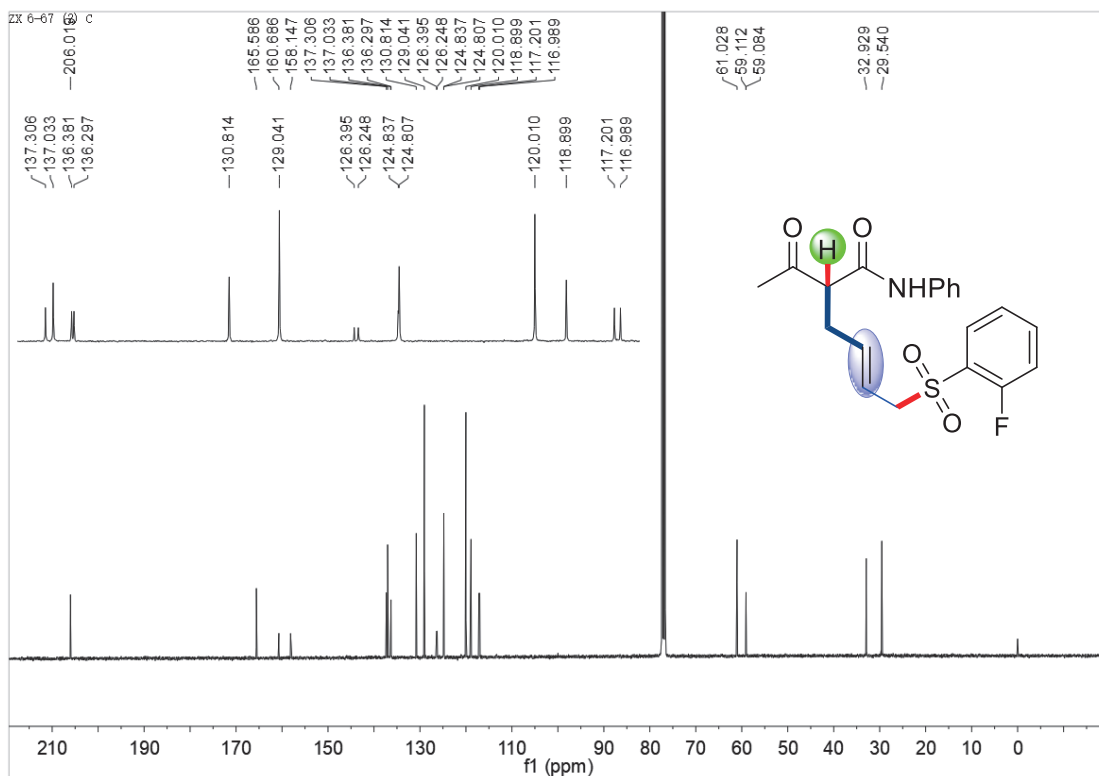

### 40, DEPT 90 and DEPT 135

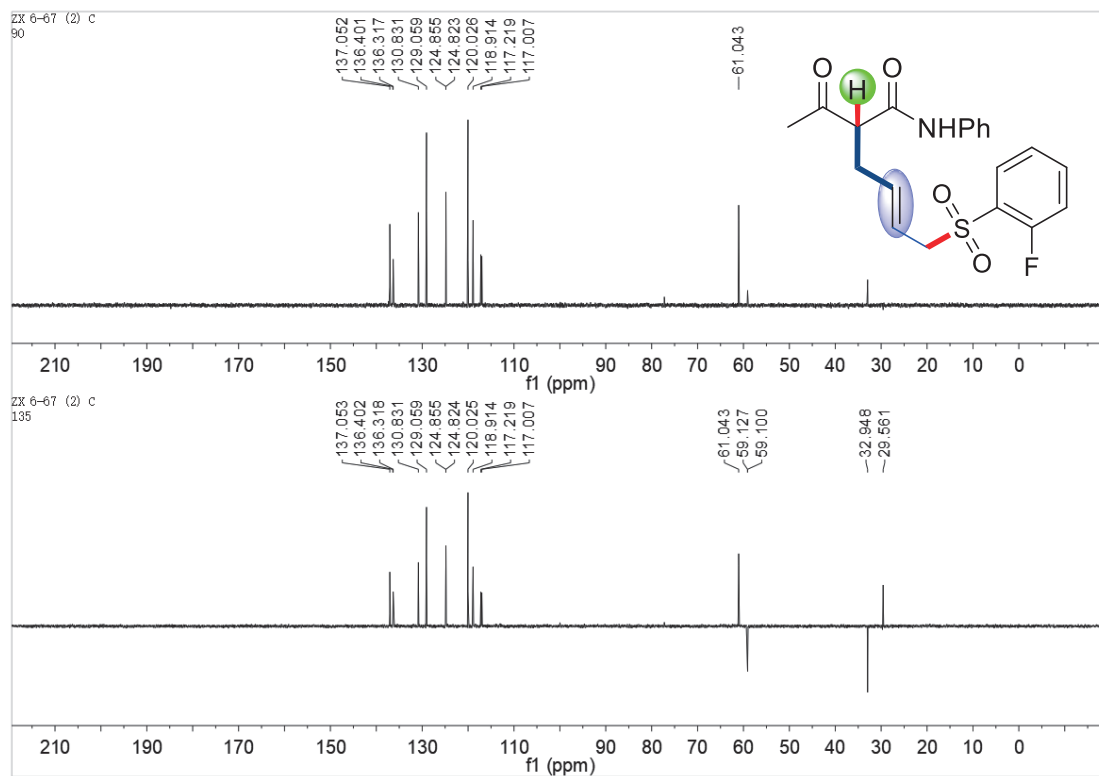

### 40, <sup>19</sup>F NMR

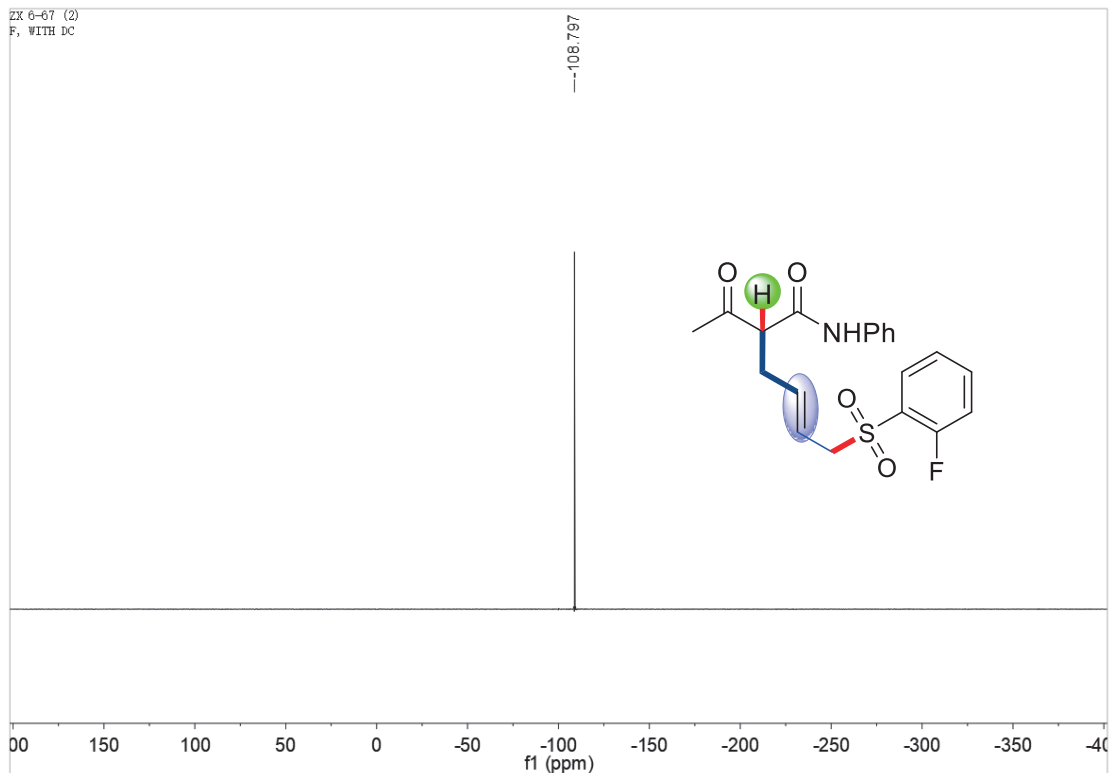

### 4p1, <sup>1</sup>H NMR

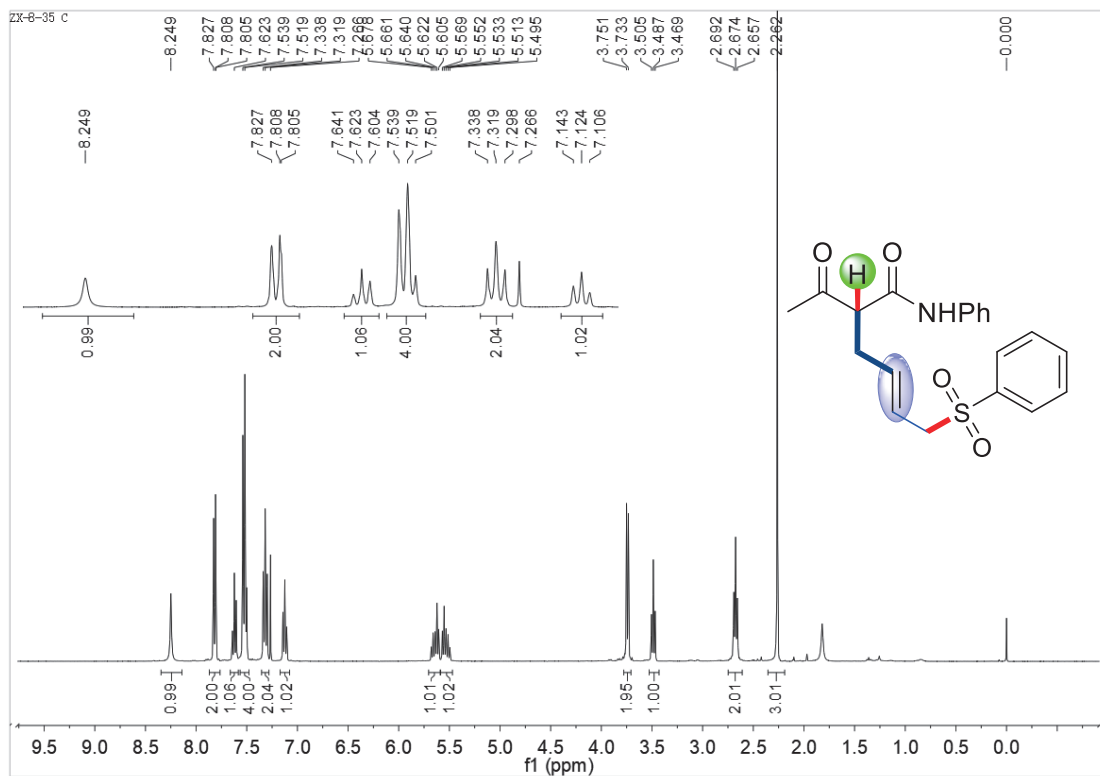

### 4p1, <sup>13</sup>C NMR

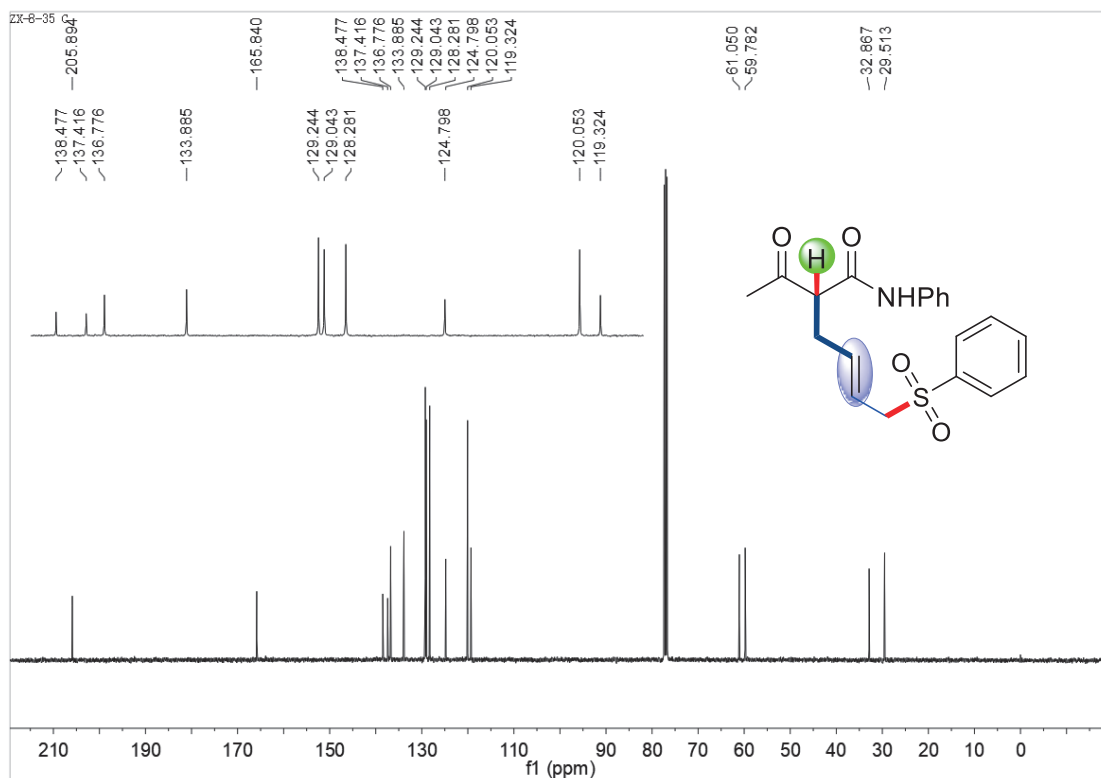

### 4p1, DEPT 90 and DEPT 135

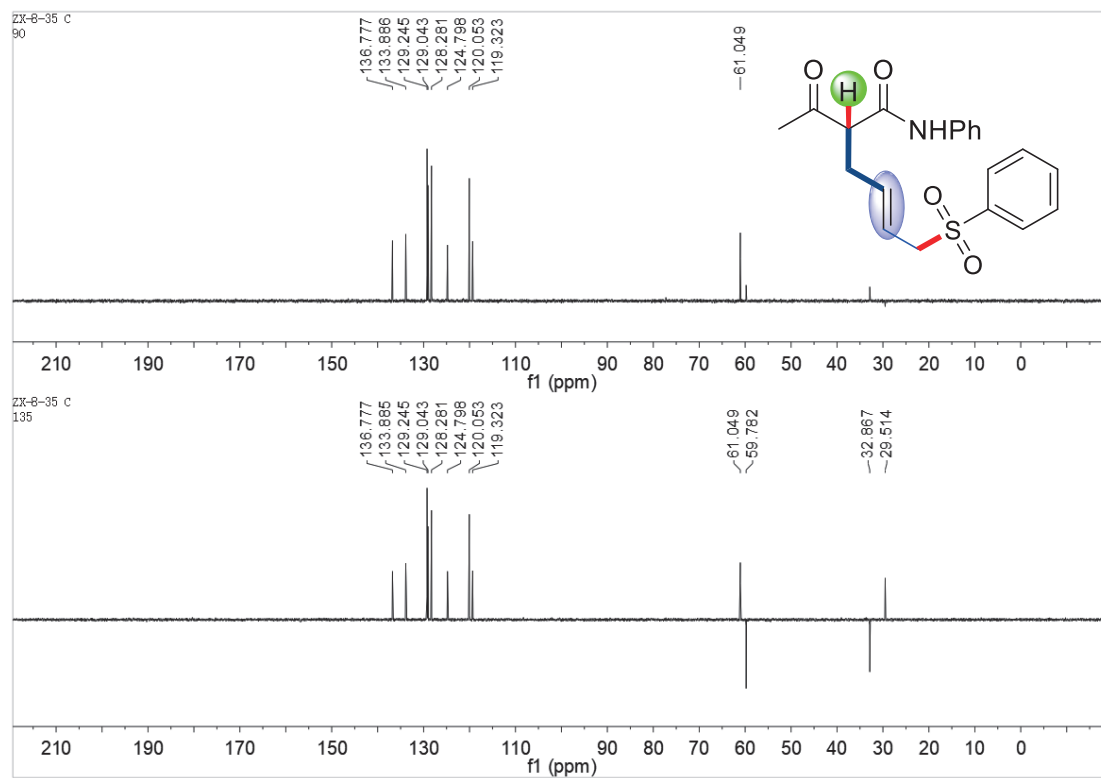

### 4p2, <sup>1</sup>H NMR

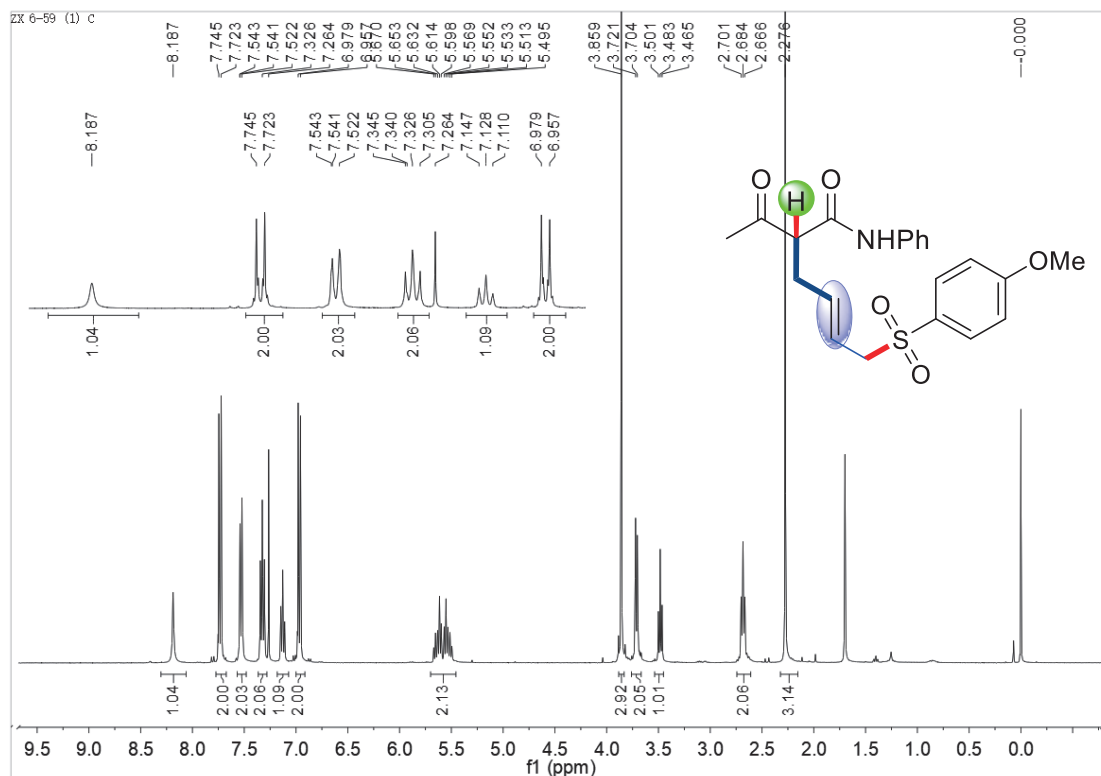

### 4p2, <sup>13</sup>C NMR

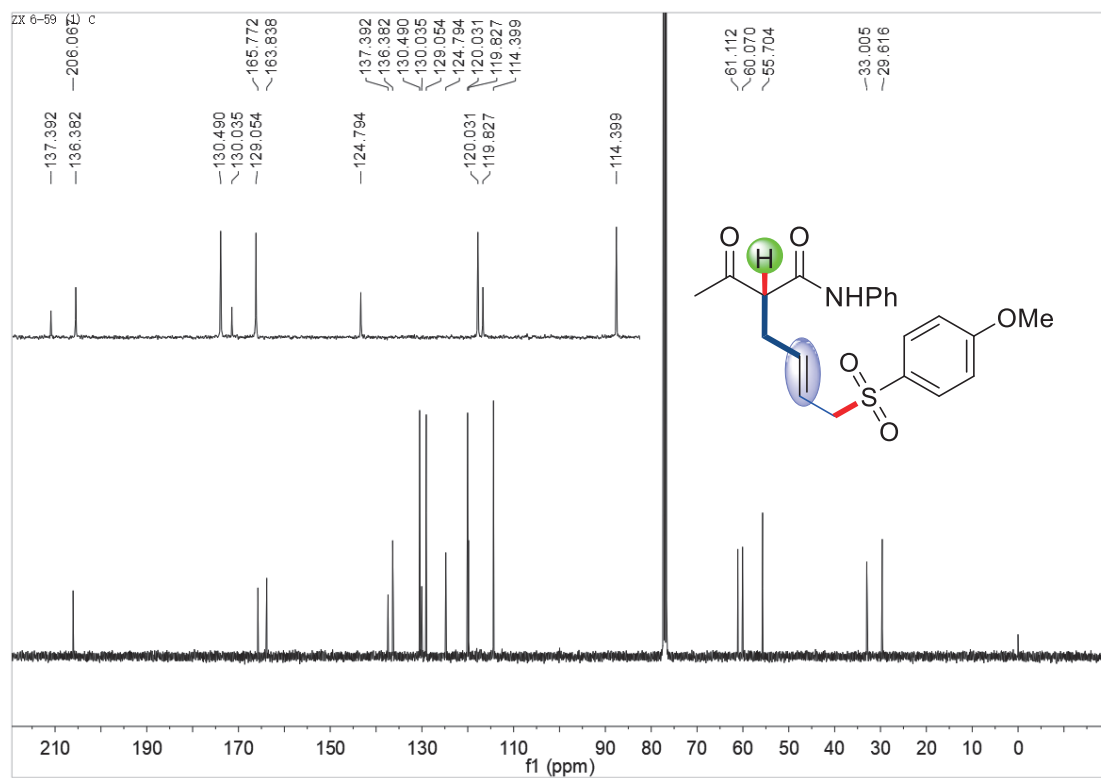

### 4p2, DEPT 90 and DEPT 135

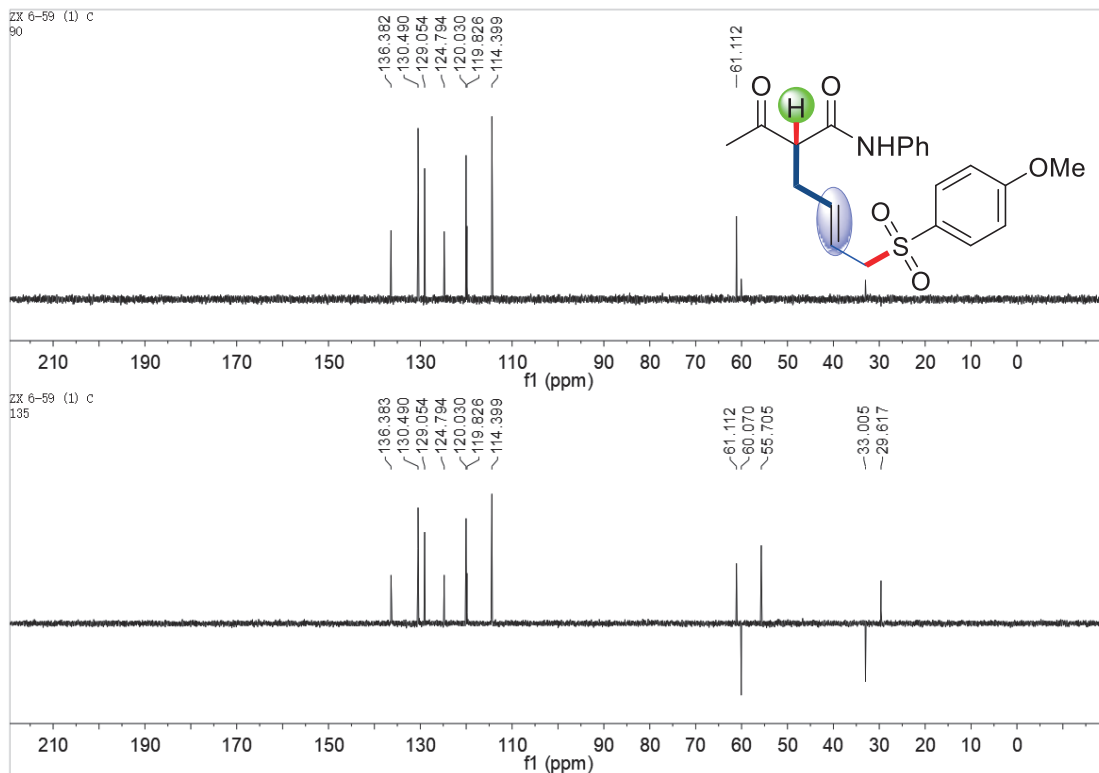

### 4p3, <sup>1</sup>H NMR

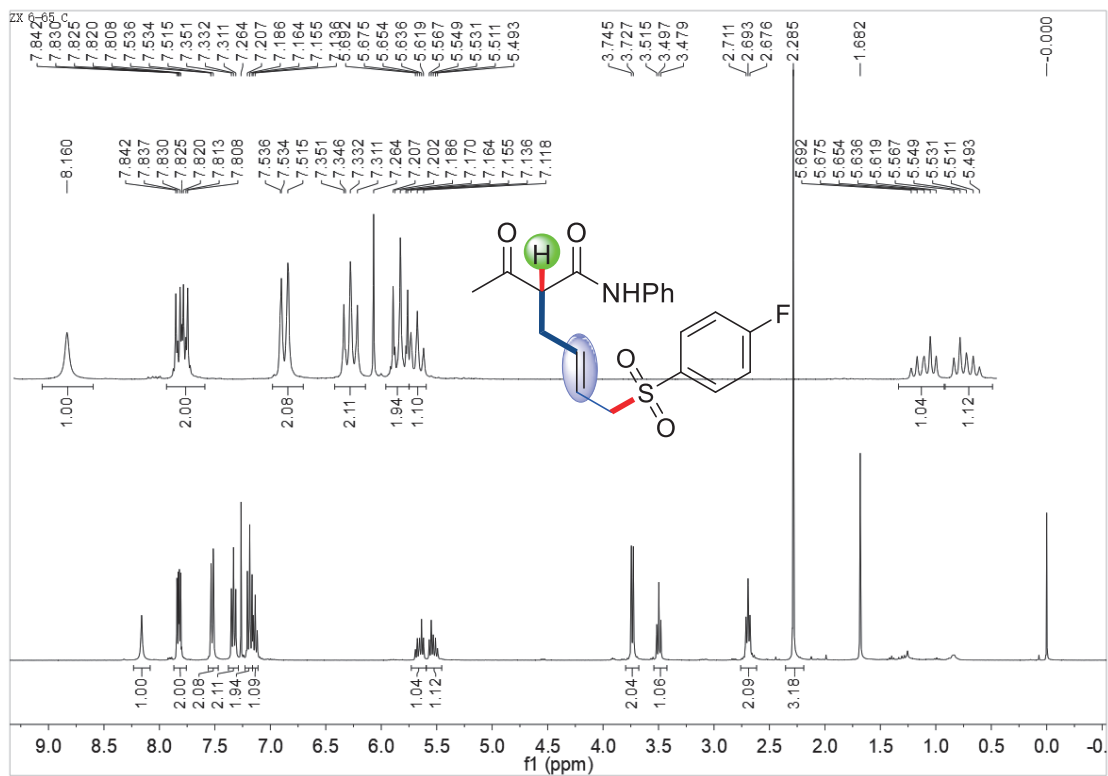

### 4p3, <sup>13</sup>C NMR

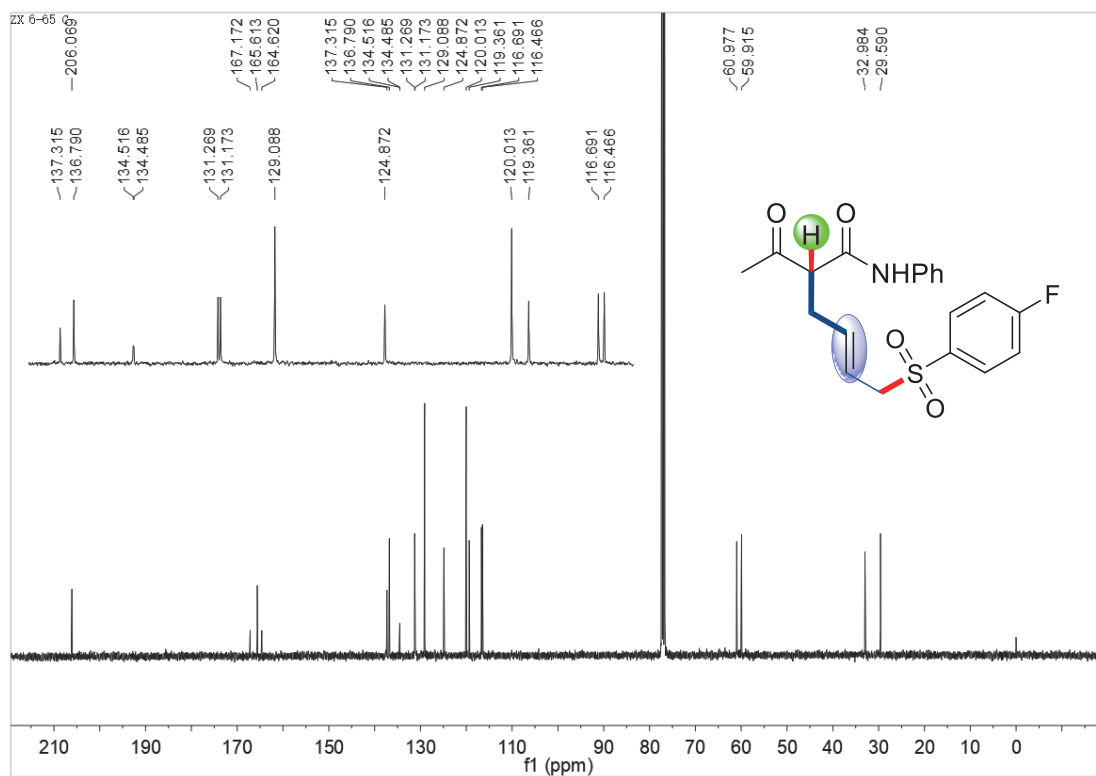

### 4p3, DEPT 90 and DEPT 135

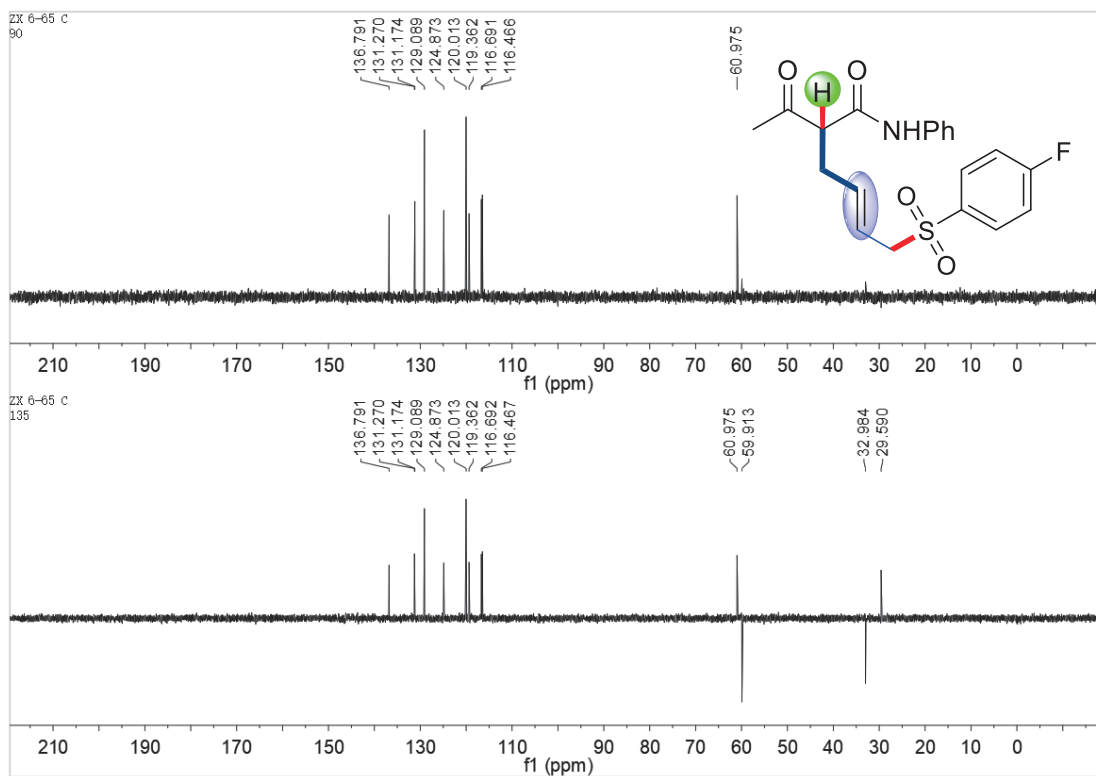



### 4p3, <sup>19</sup>F NMR

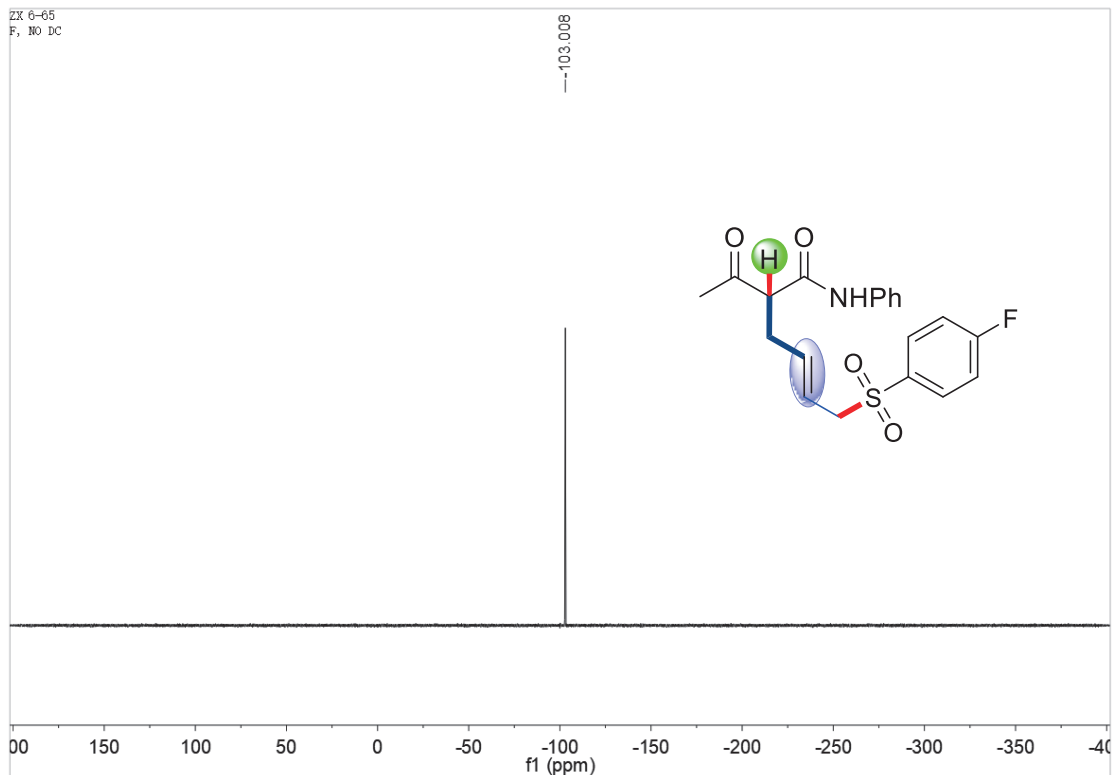

### 4p4, <sup>1</sup>H NMR

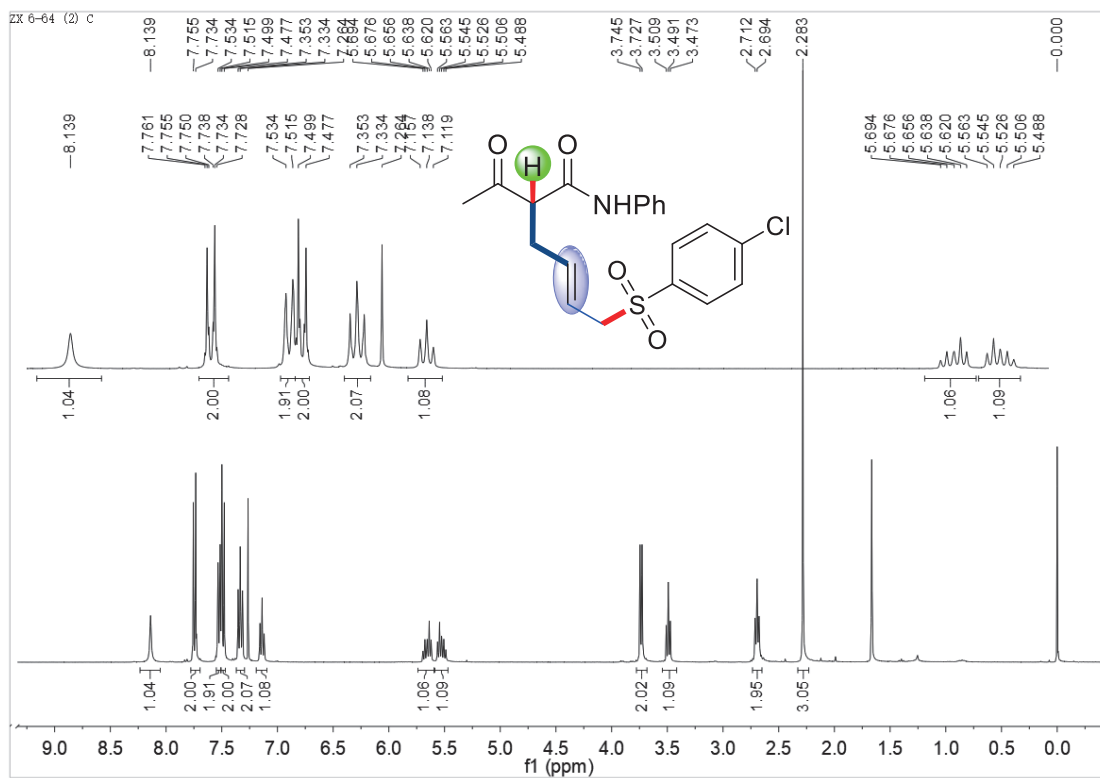

### 4p4, <sup>13</sup>C NMR

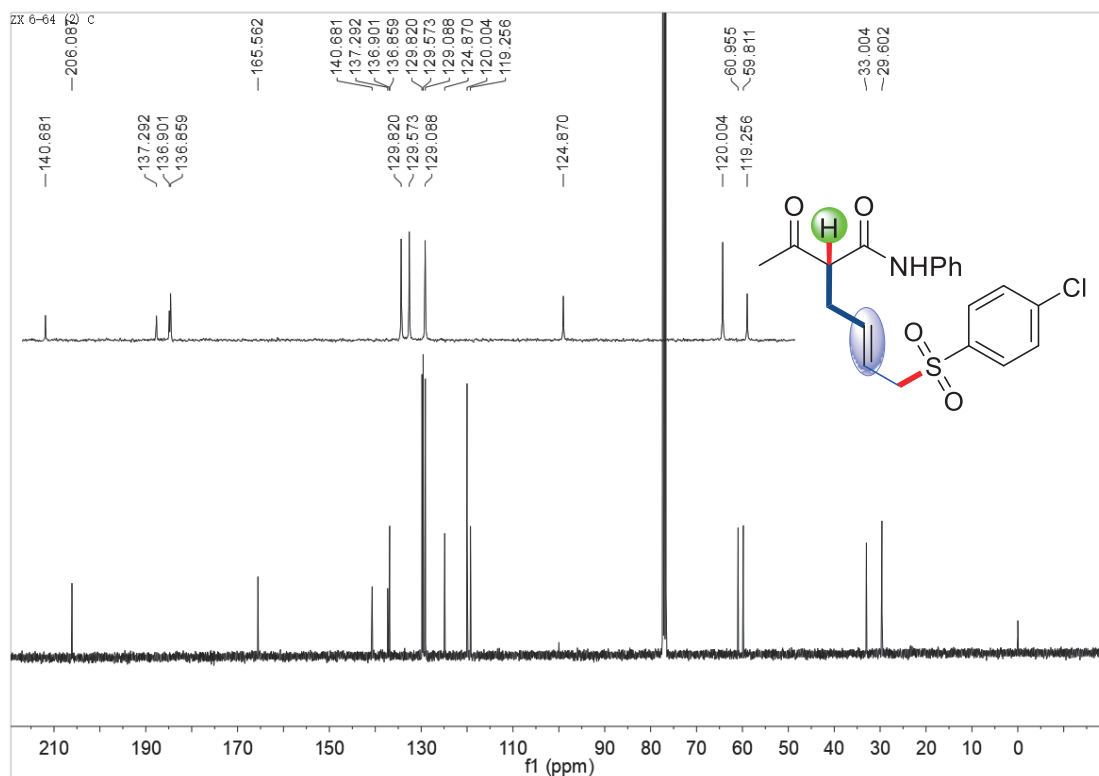

### 4p4, DEPT 90 and DEPT 135

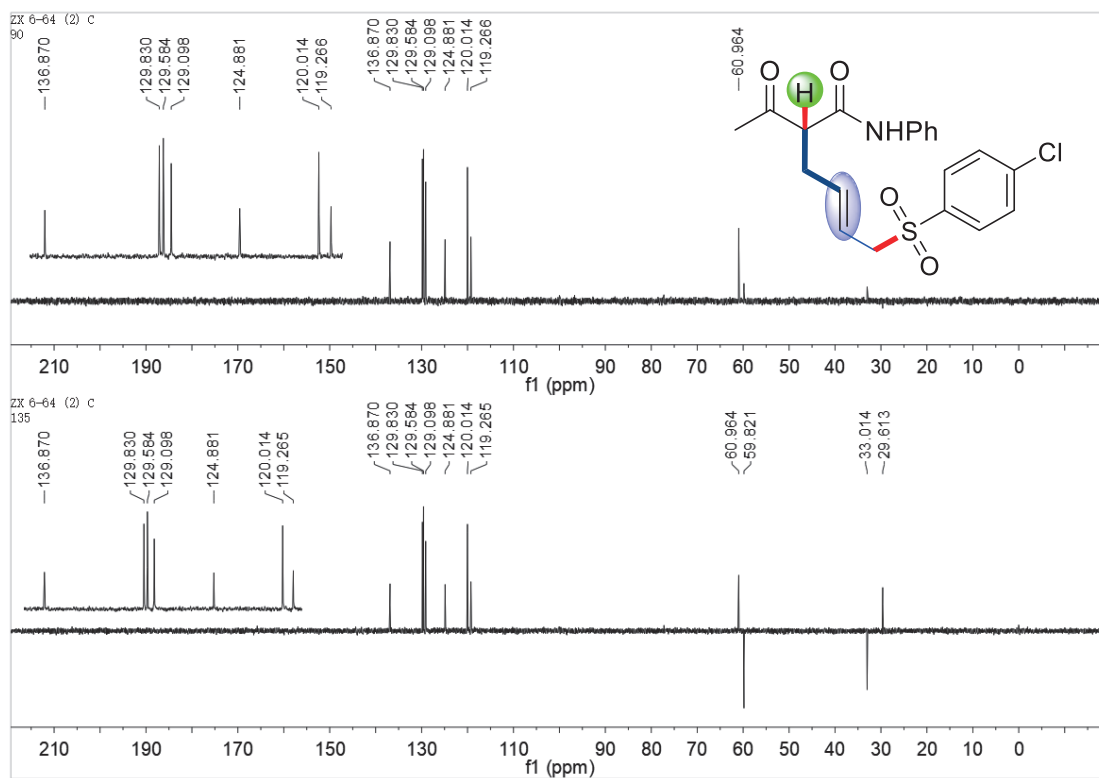

### 4p5, <sup>1</sup>H NMR

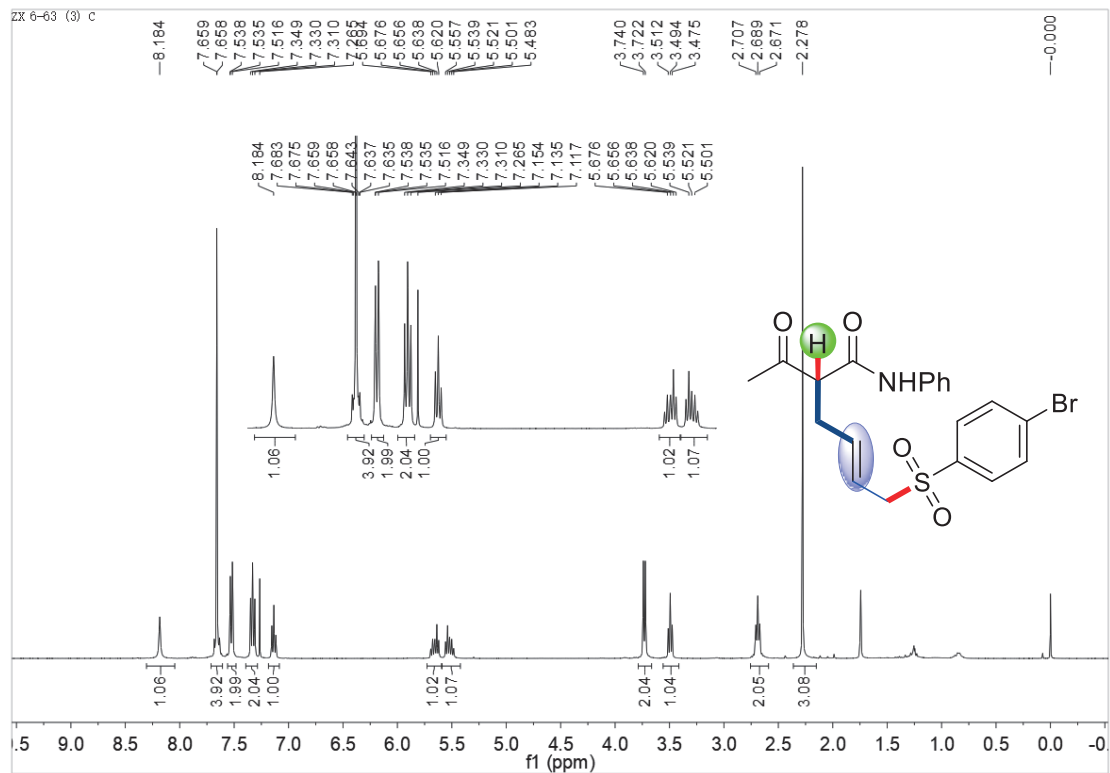

### 4p5, <sup>13</sup>C NMR

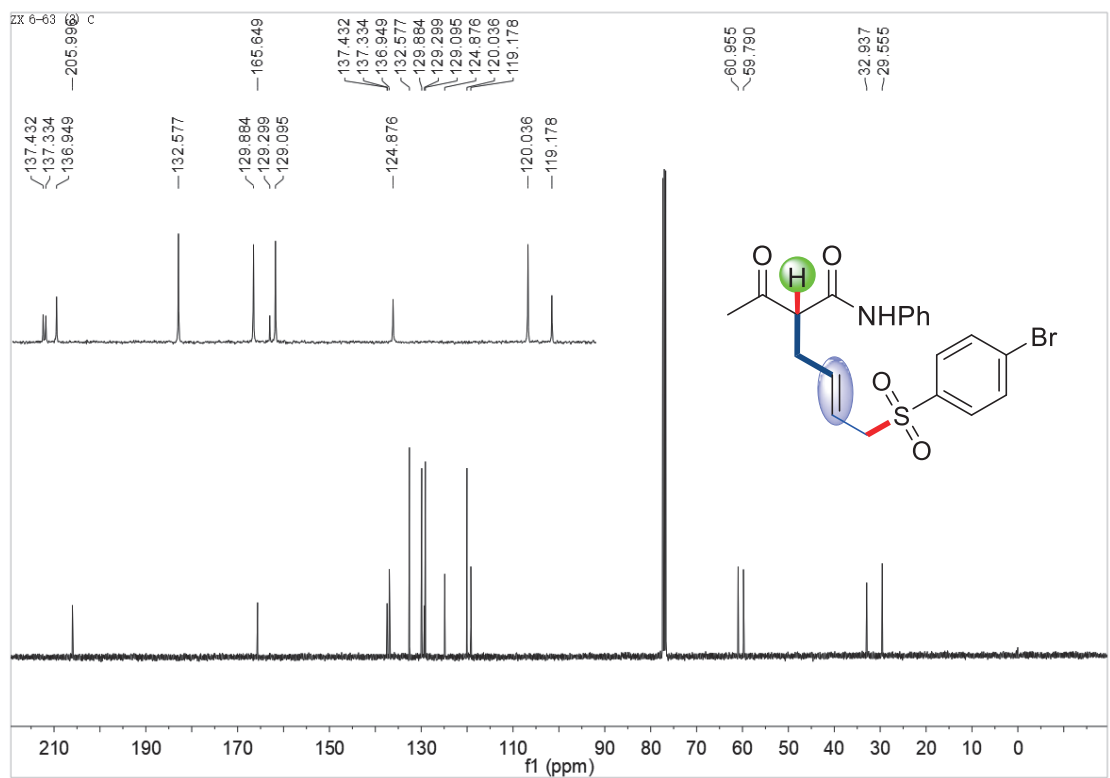

### 4p5, DEPT 90 and DEPT 135

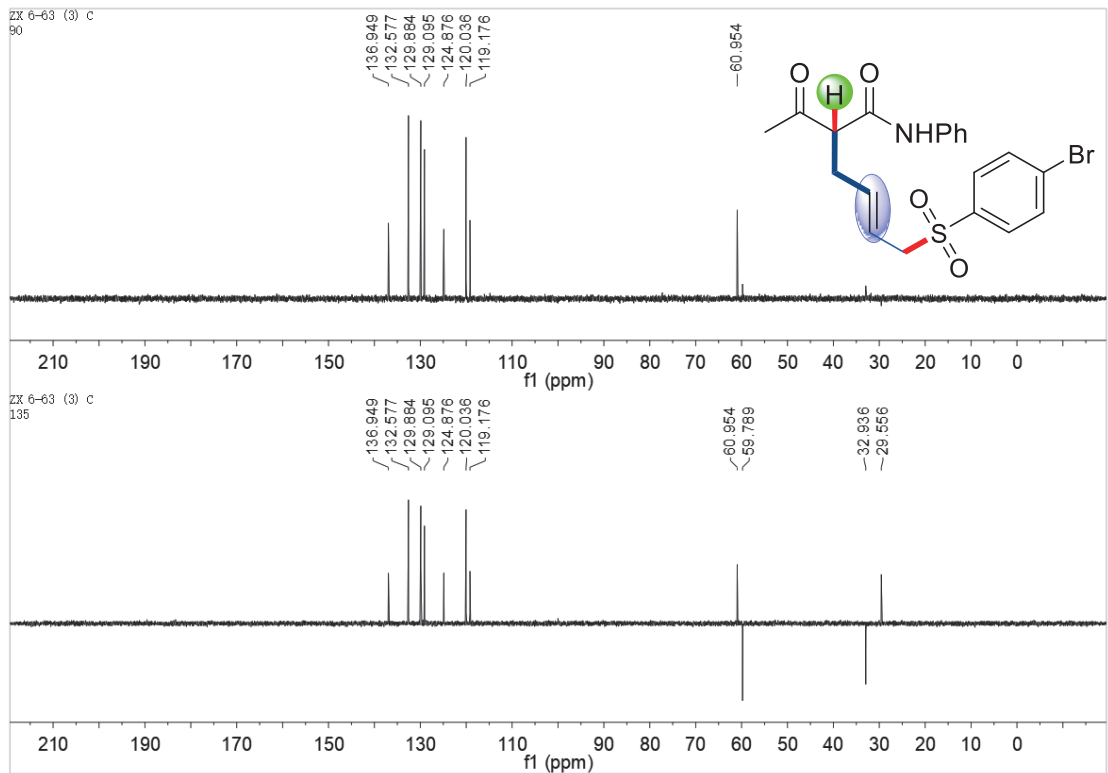

### 4p6, <sup>1</sup>H NMR

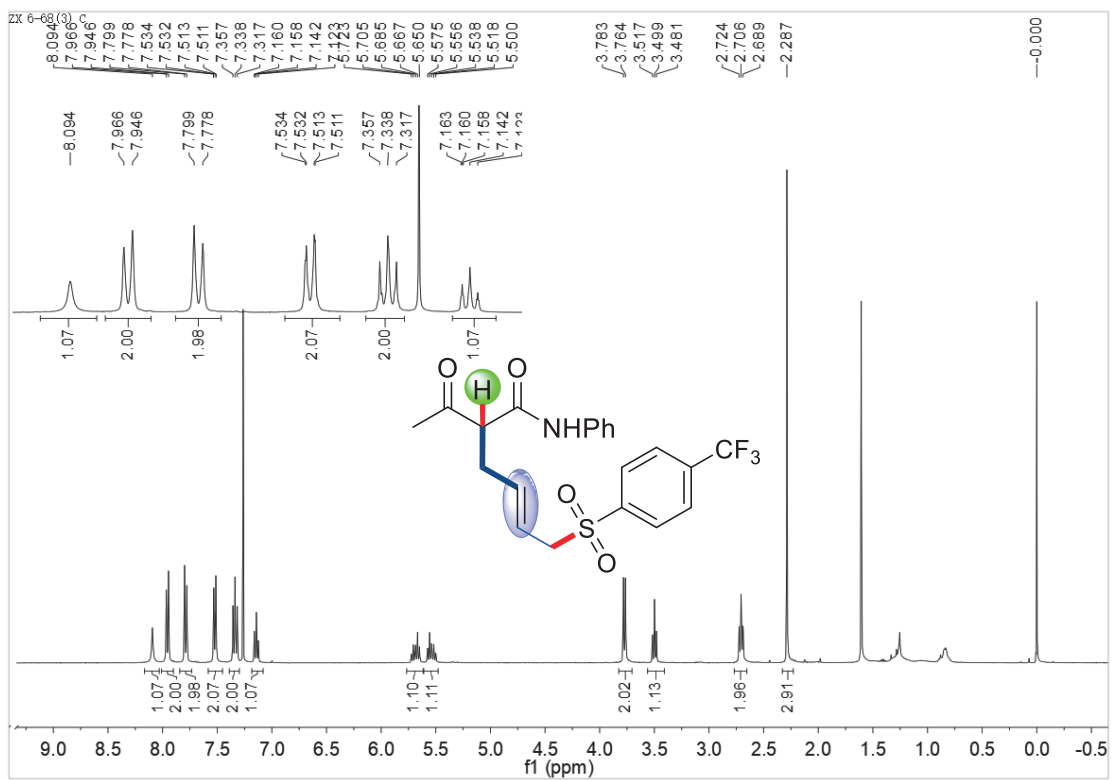

### 4p6, <sup>13</sup>C NMR

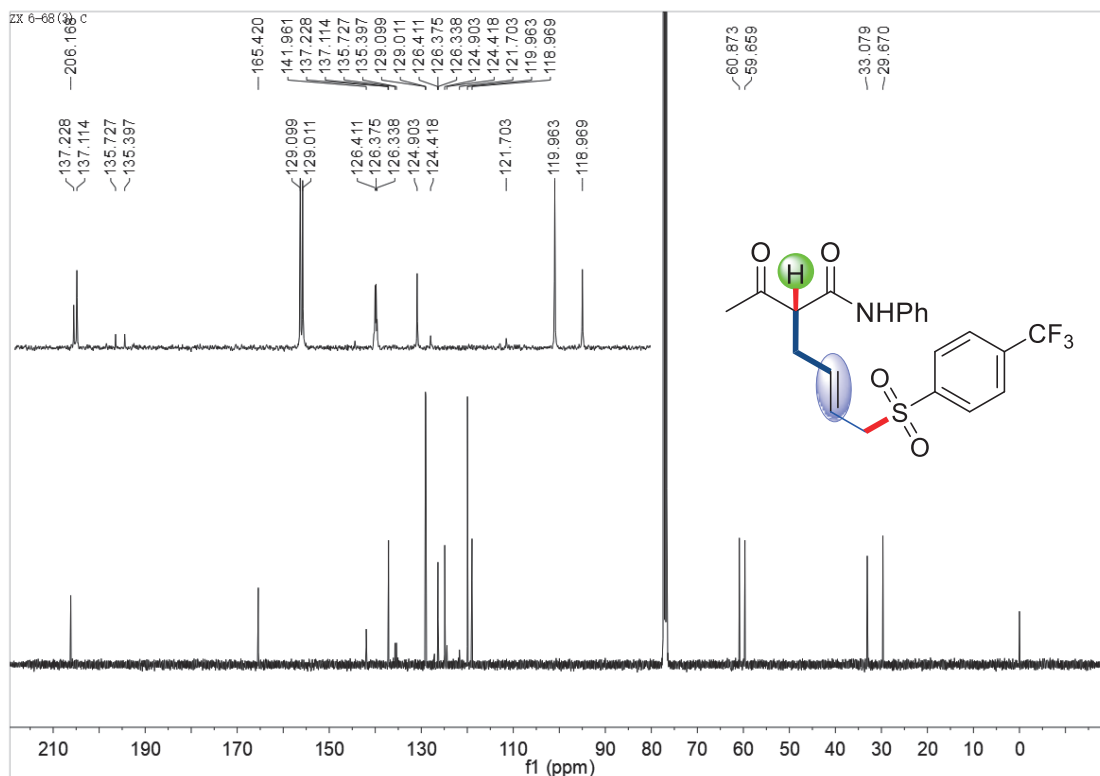

### 4p6, DEPT 90 and DEPT 135

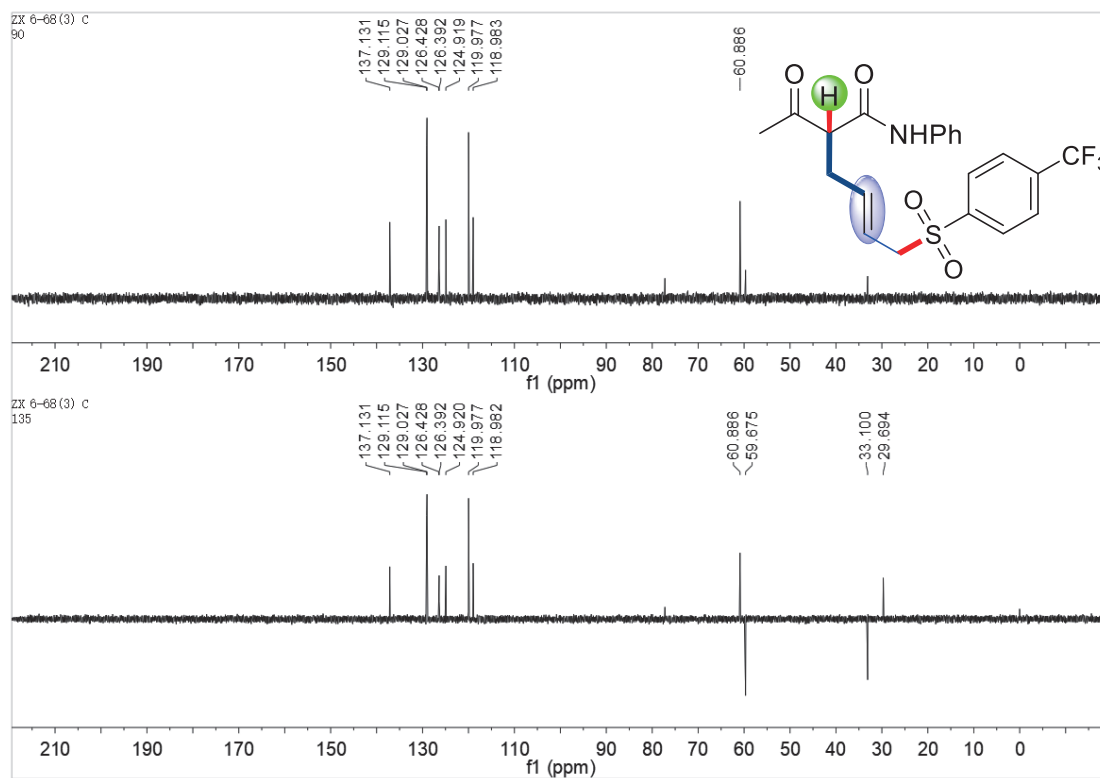

### 4p6, <sup>19</sup>F NMR

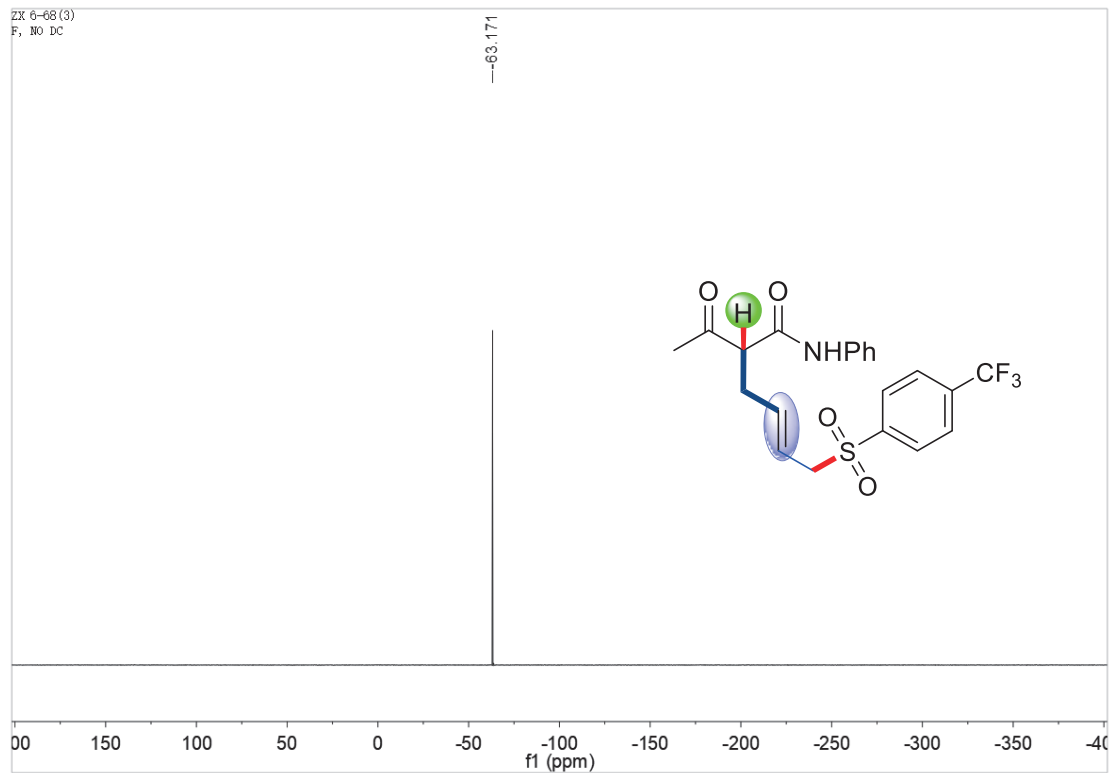

### 4p7, <sup>1</sup>H NMR

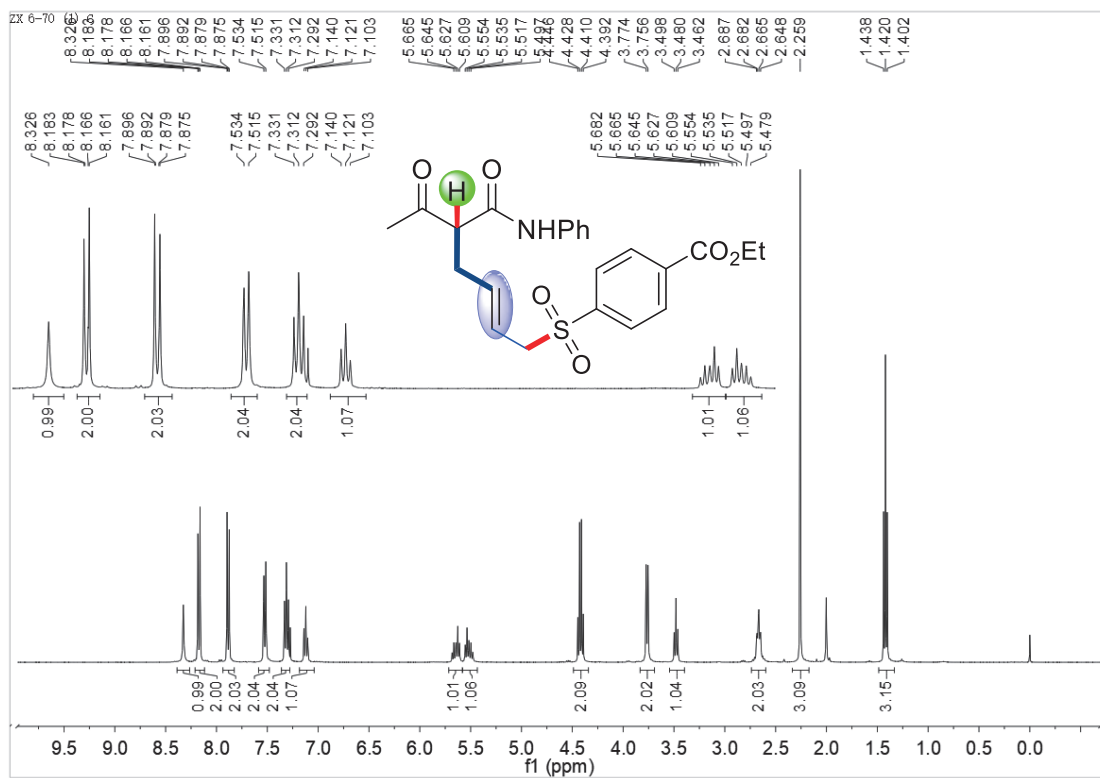

### 4p7, <sup>13</sup>C NMR

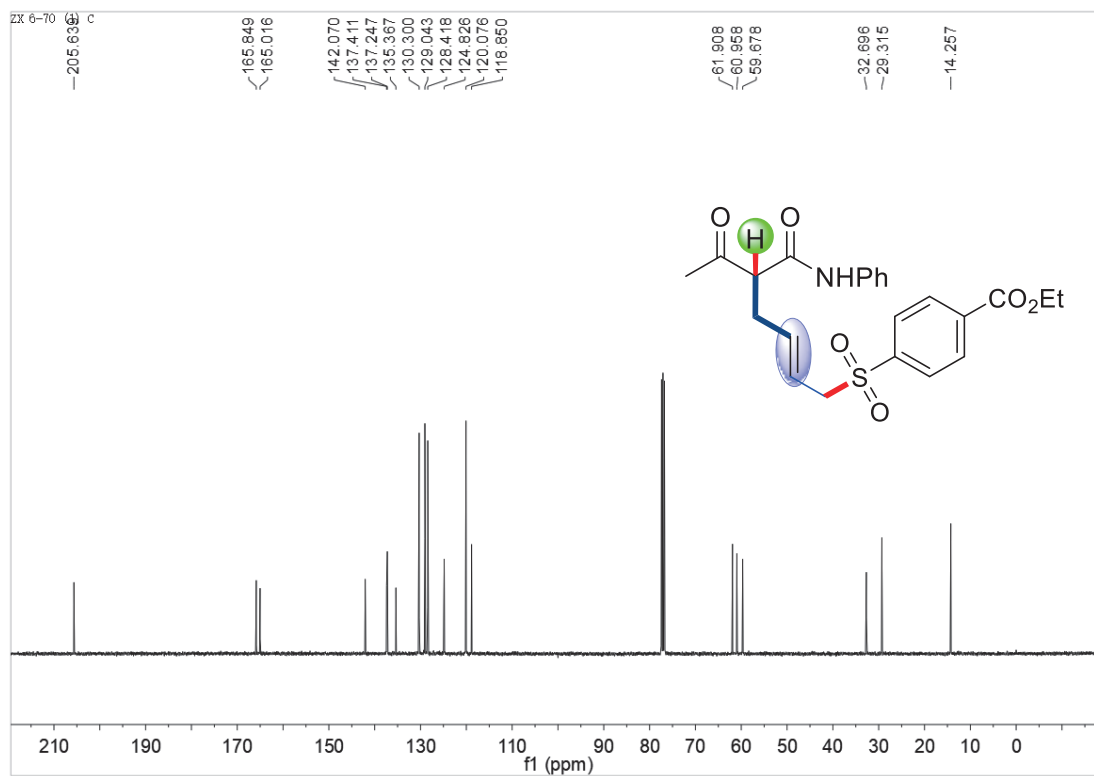

### 4p7, DEPT 90 and DEPT 135

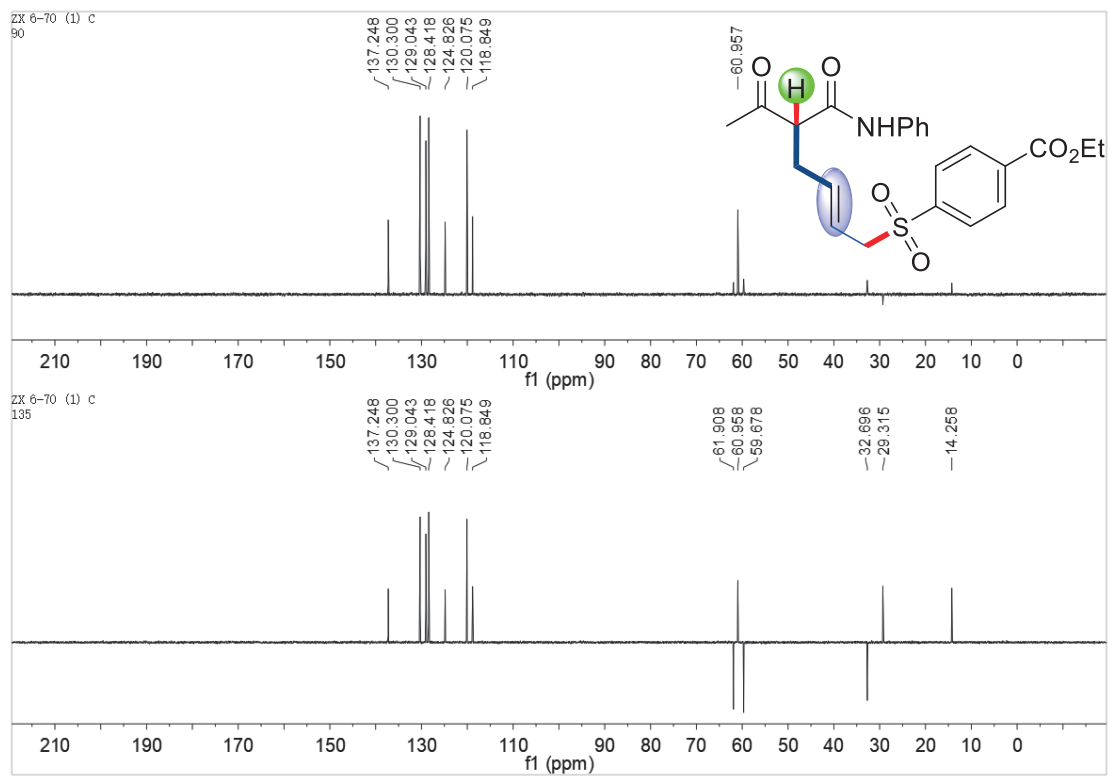

### 4p8, <sup>1</sup>H NMR

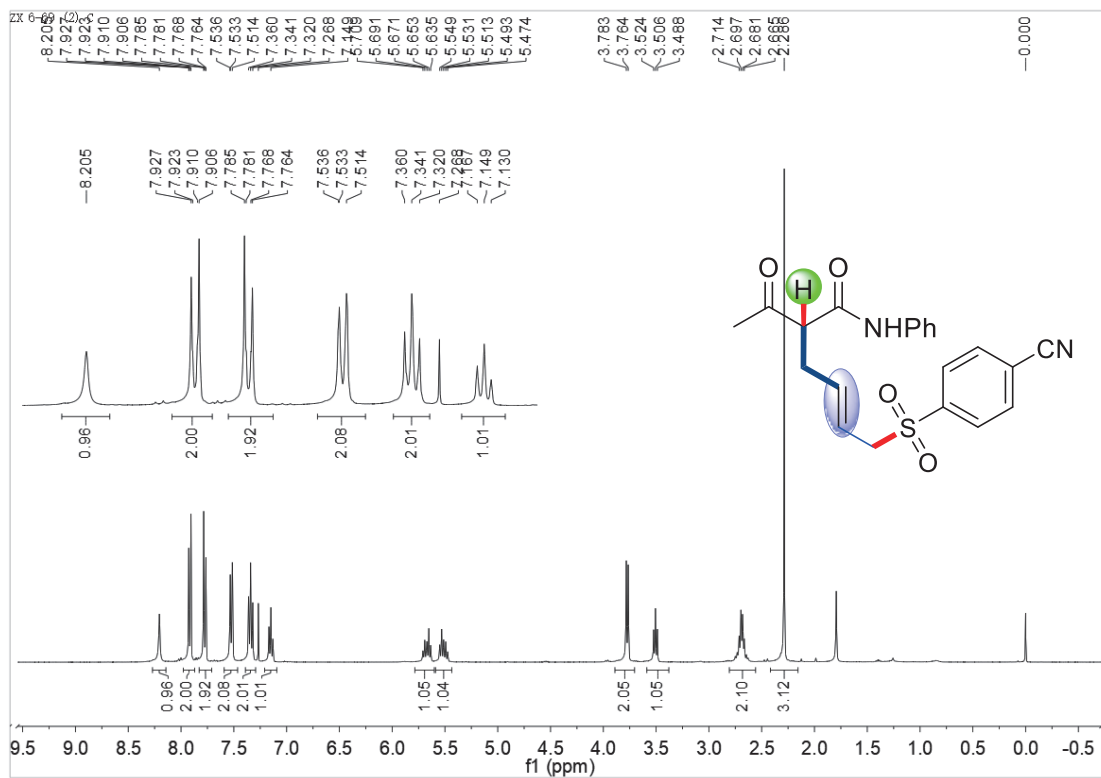

### 4p8, <sup>13</sup>C NMR

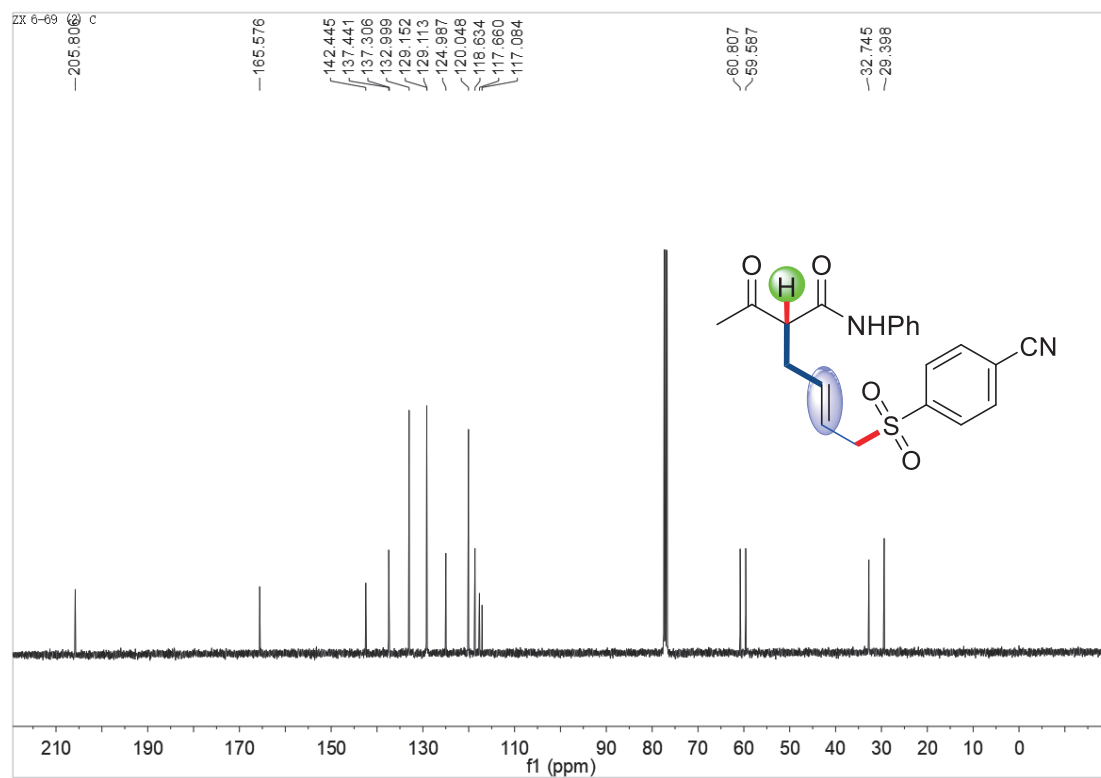



### 4p8, DEPT 90 and DEPT 135

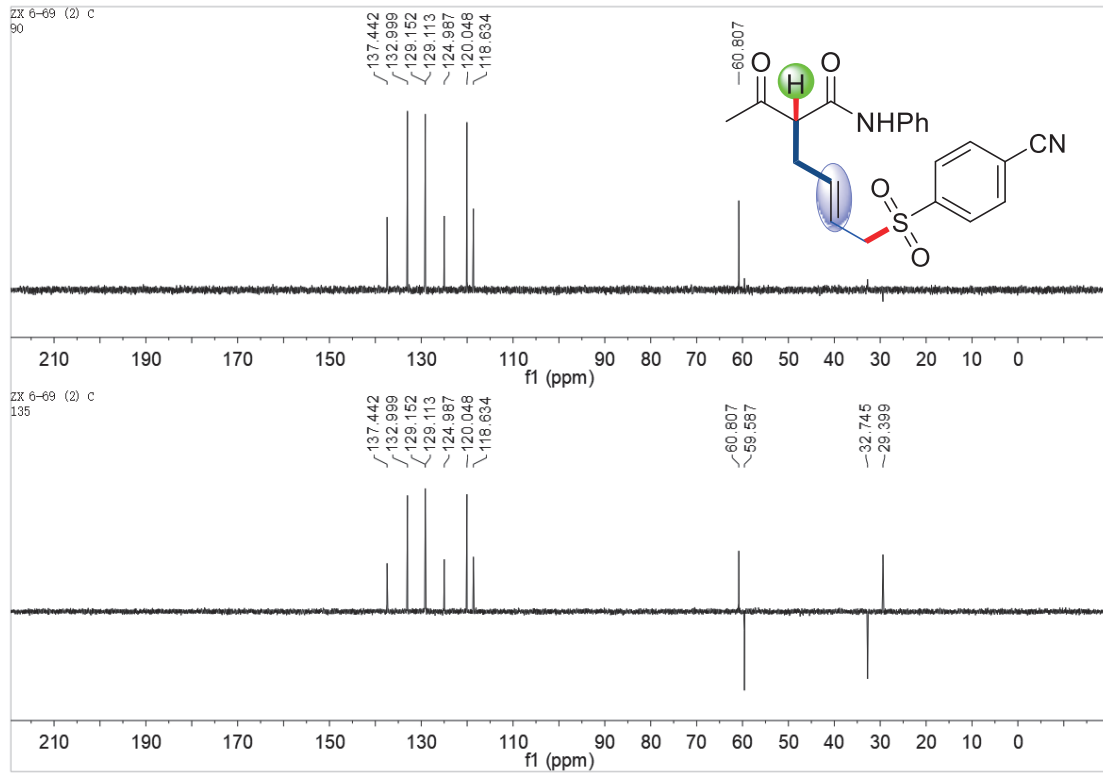

### 4q, <sup>1</sup>H NMR

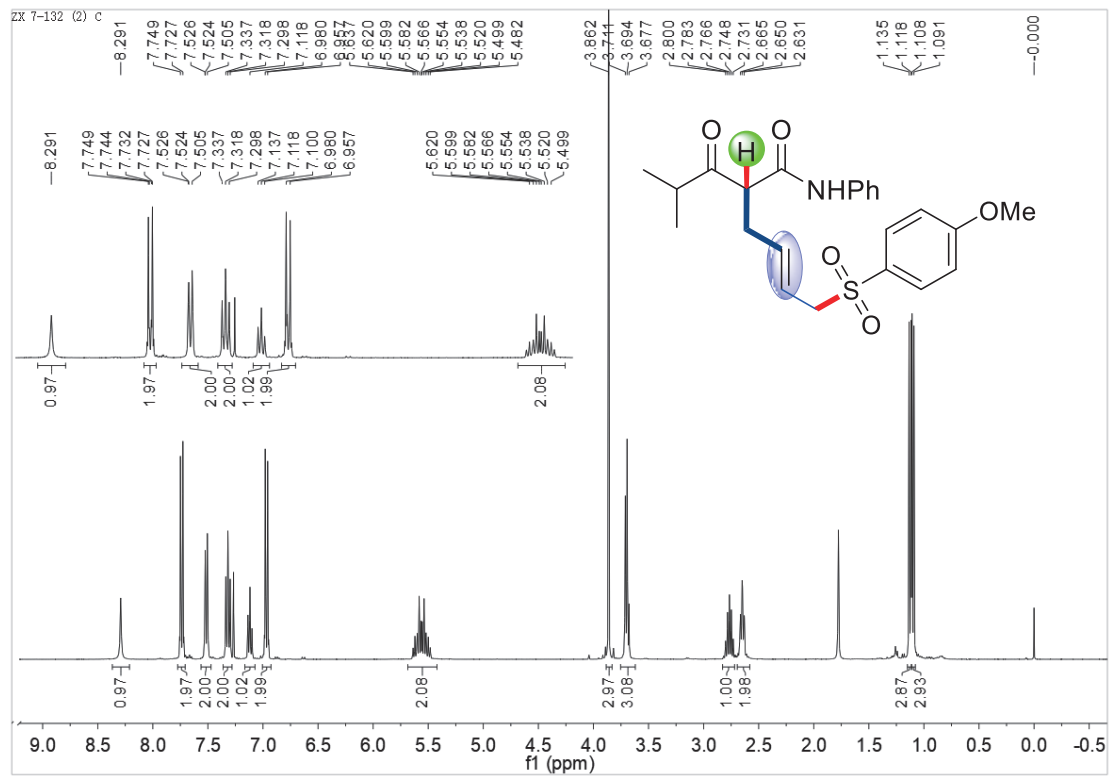

### 4q, <sup>13</sup>C NMR

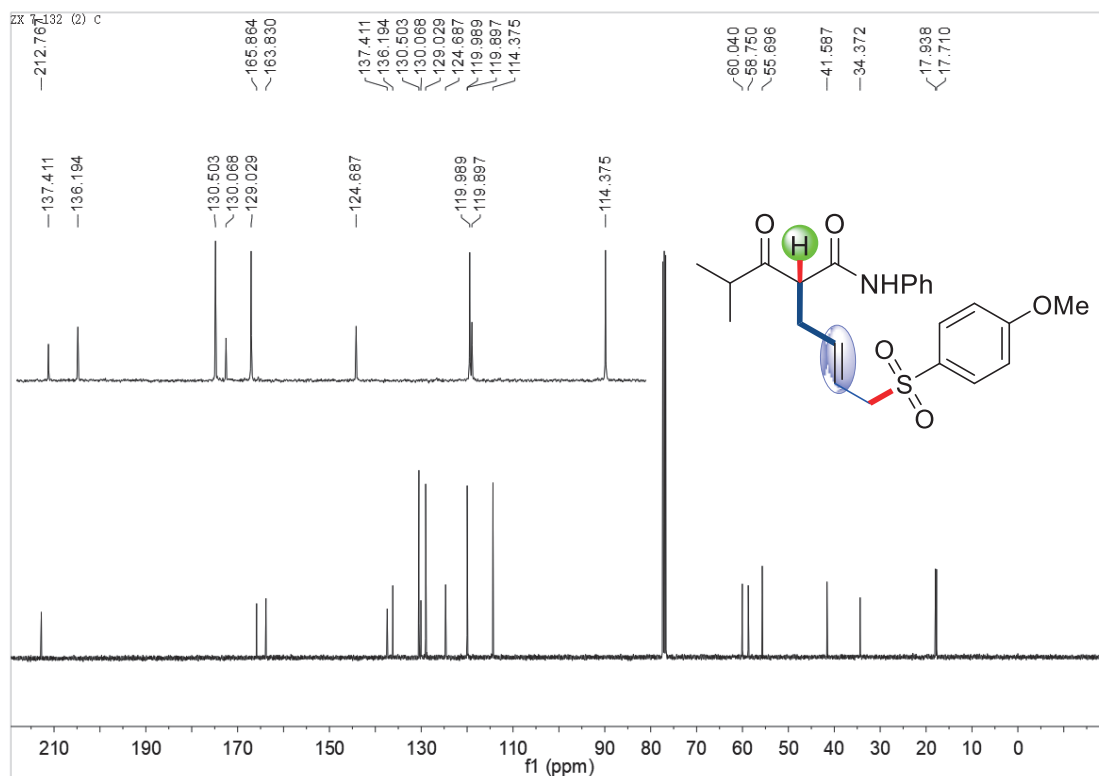

### 4q, DEPT 90 and DEPT 135

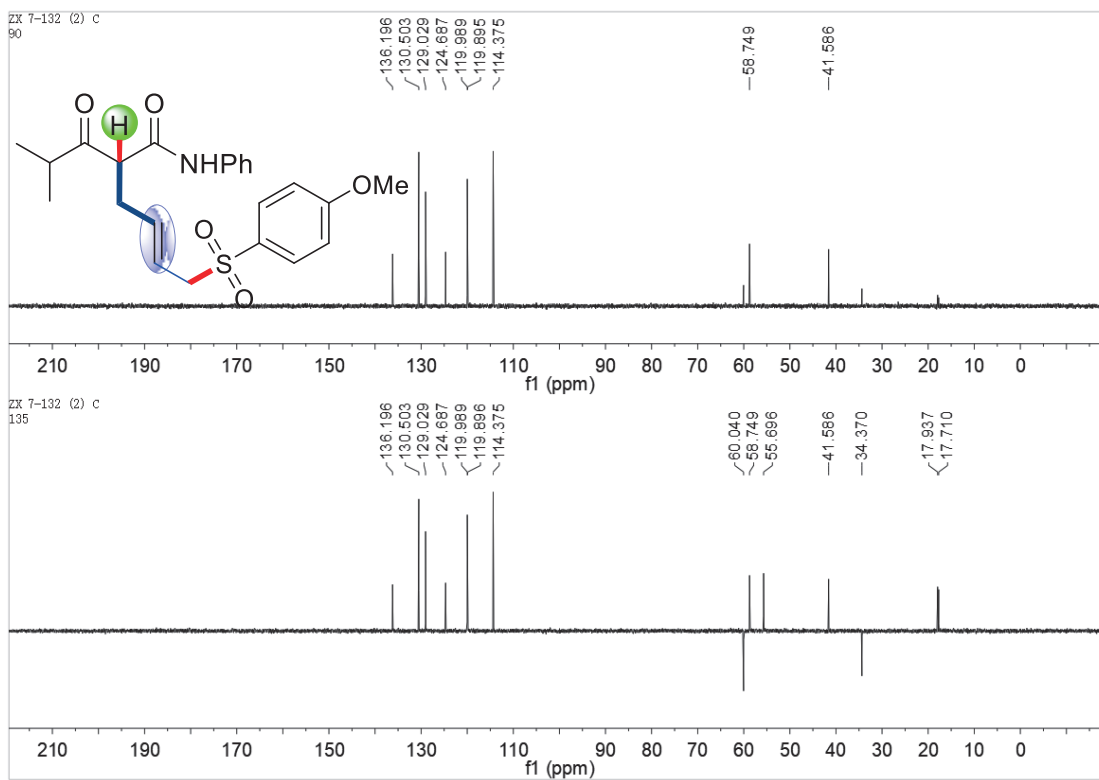

### 4r1, <sup>1</sup>H NMR

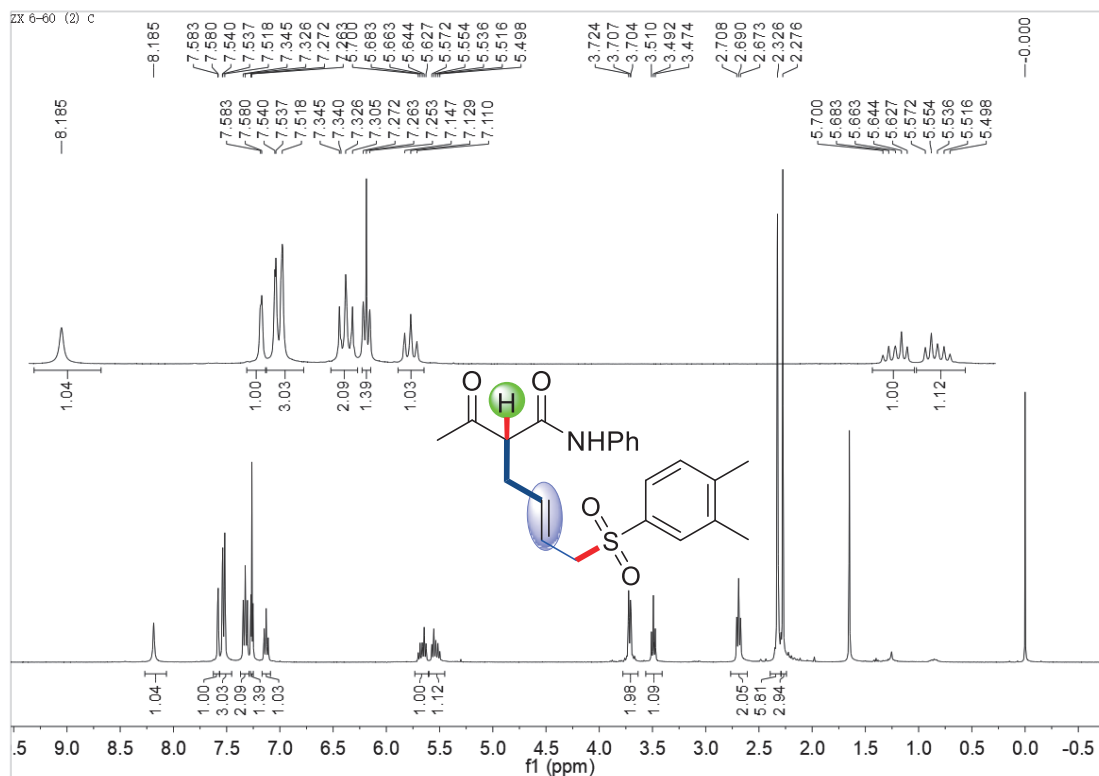

### 4r1, <sup>13</sup>C NMR

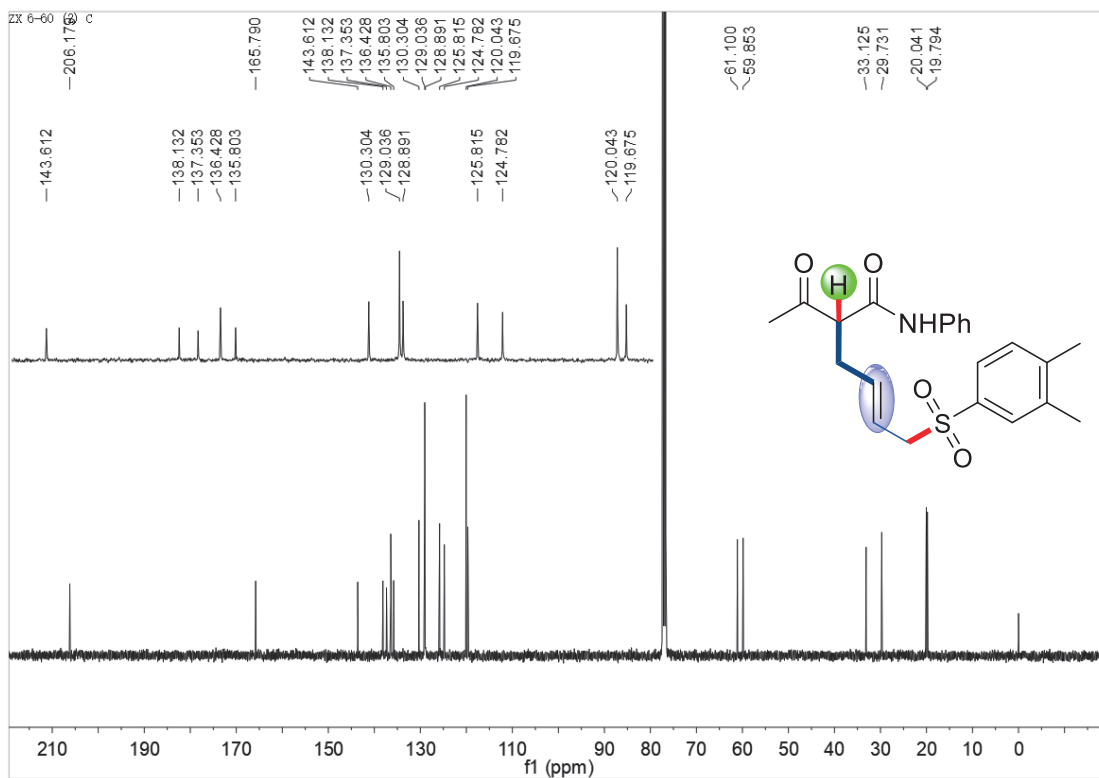

### 4r1, DEPT 90 and DEPT 135

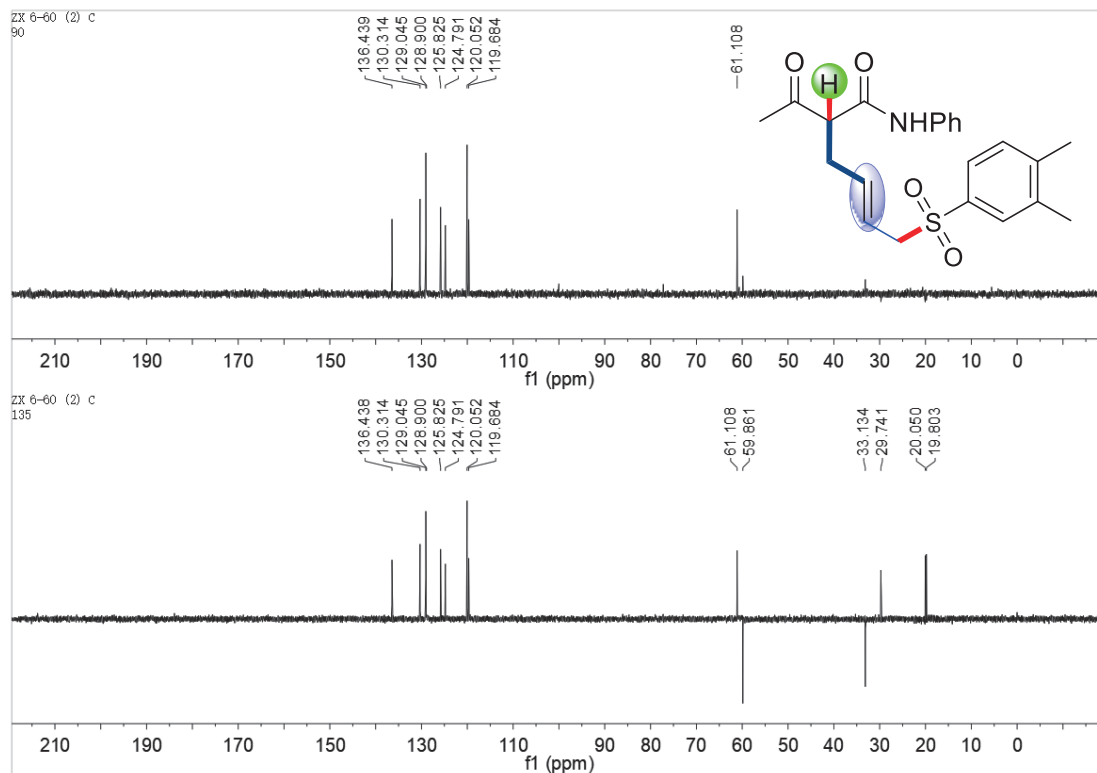

### 4r2, <sup>1</sup>H NMR

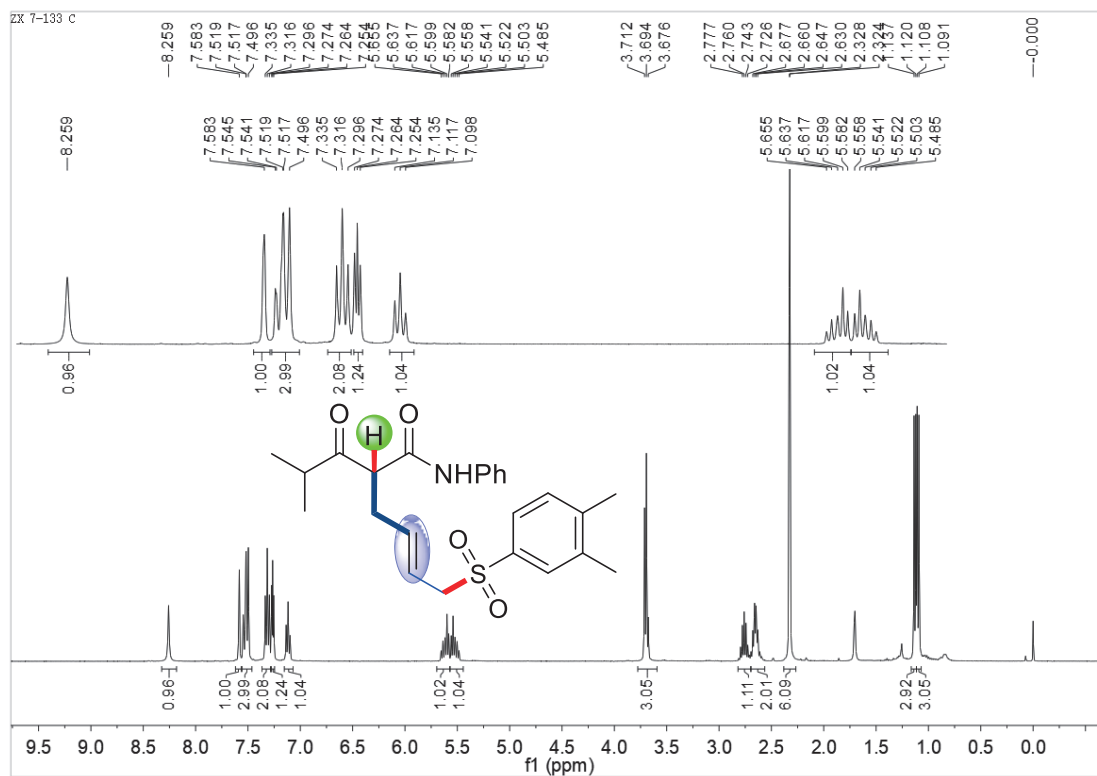

### 4r2, <sup>13</sup>C NMR

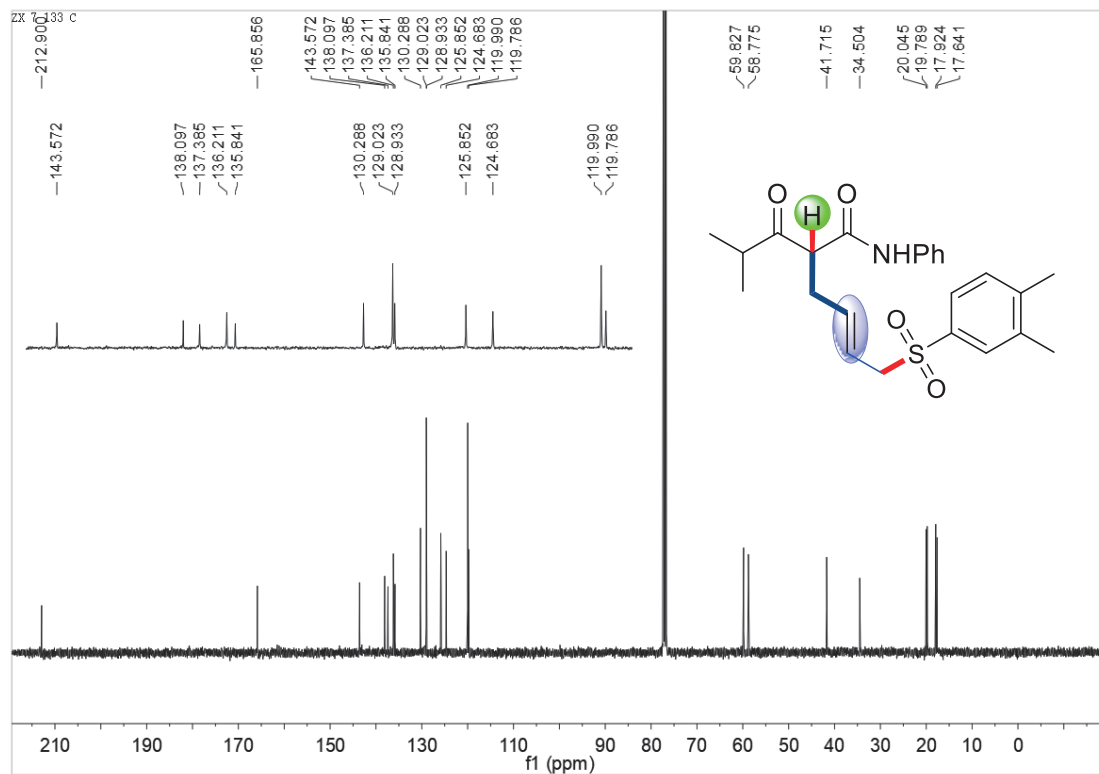

### 4r2, DEPT 90 and DEPT 135

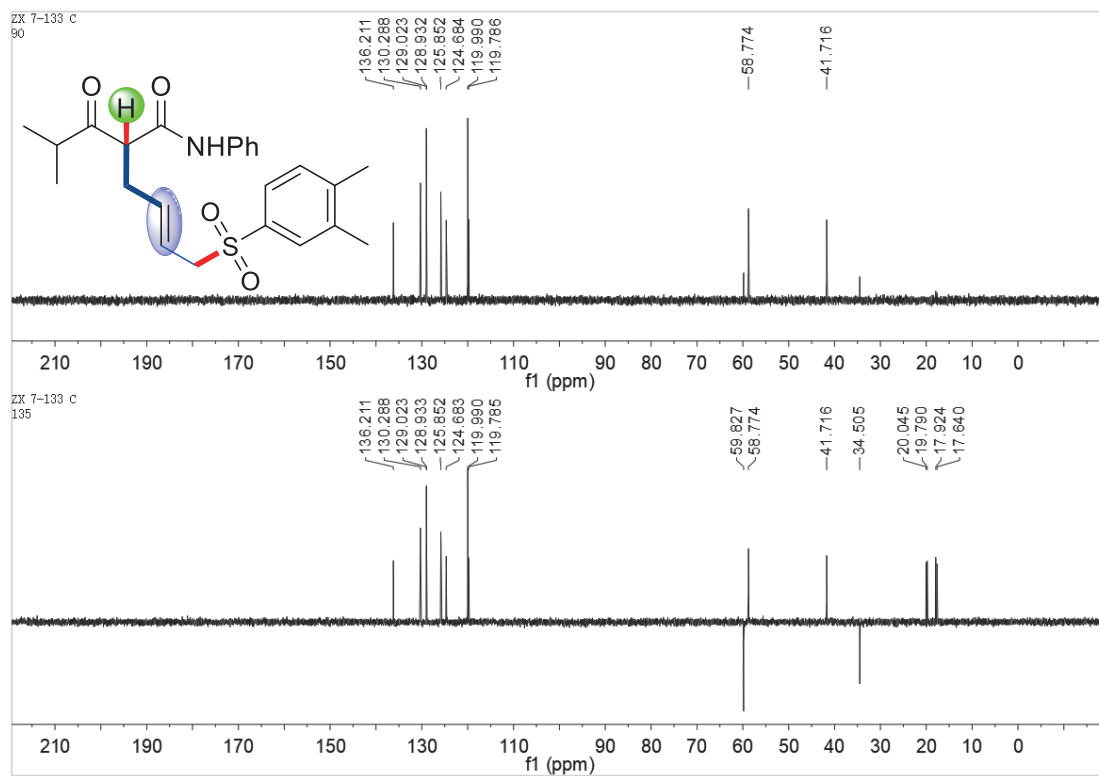

### 4s1, <sup>1</sup>H NMR

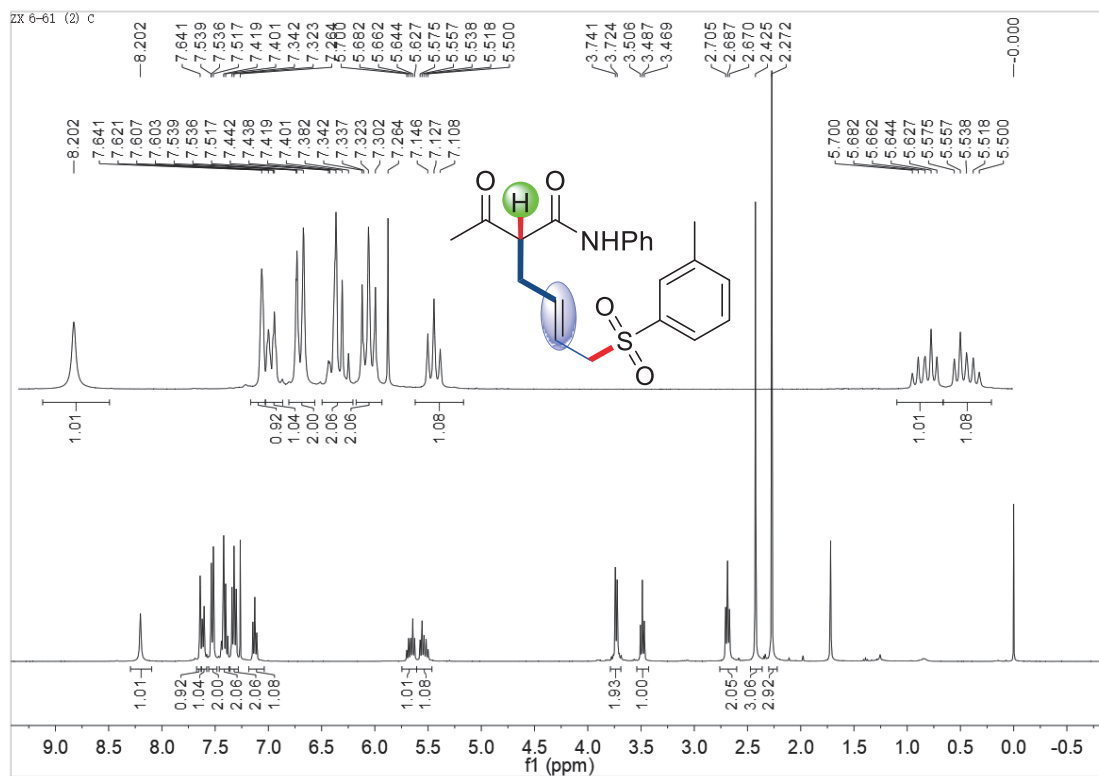

### 4s1, <sup>13</sup>C NMR

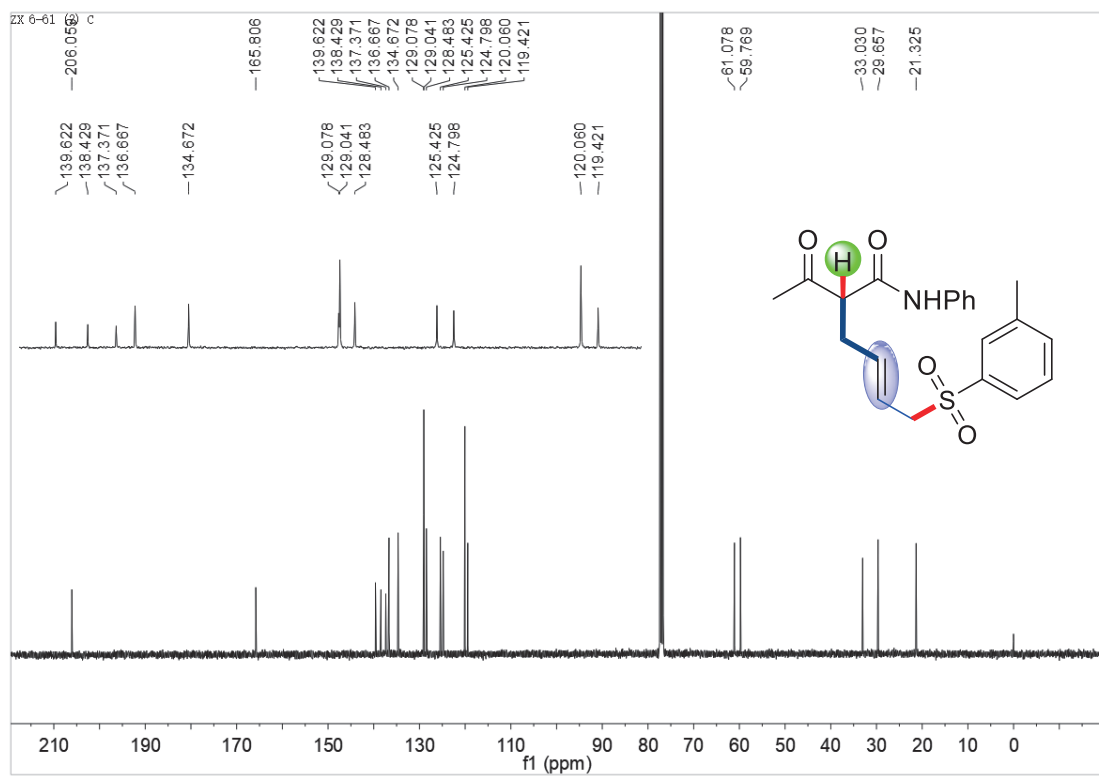

### 4s1, DEPT 90 and DEPT 135

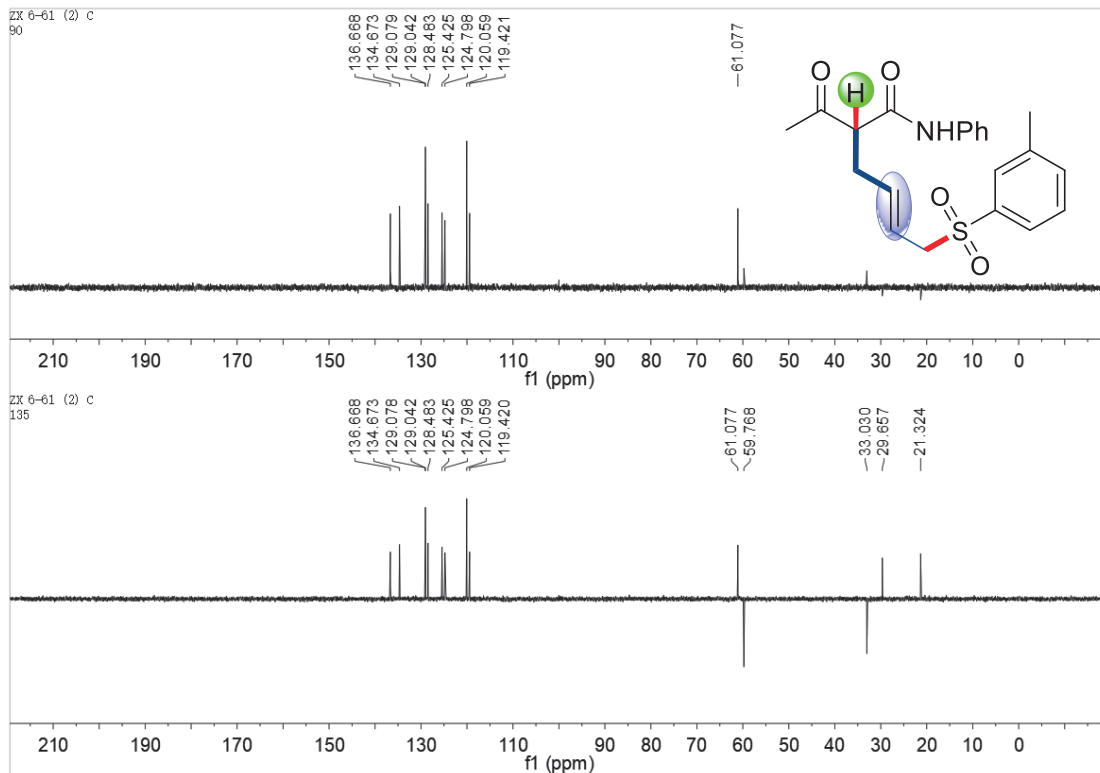

### 4s2, <sup>1</sup>H NMR

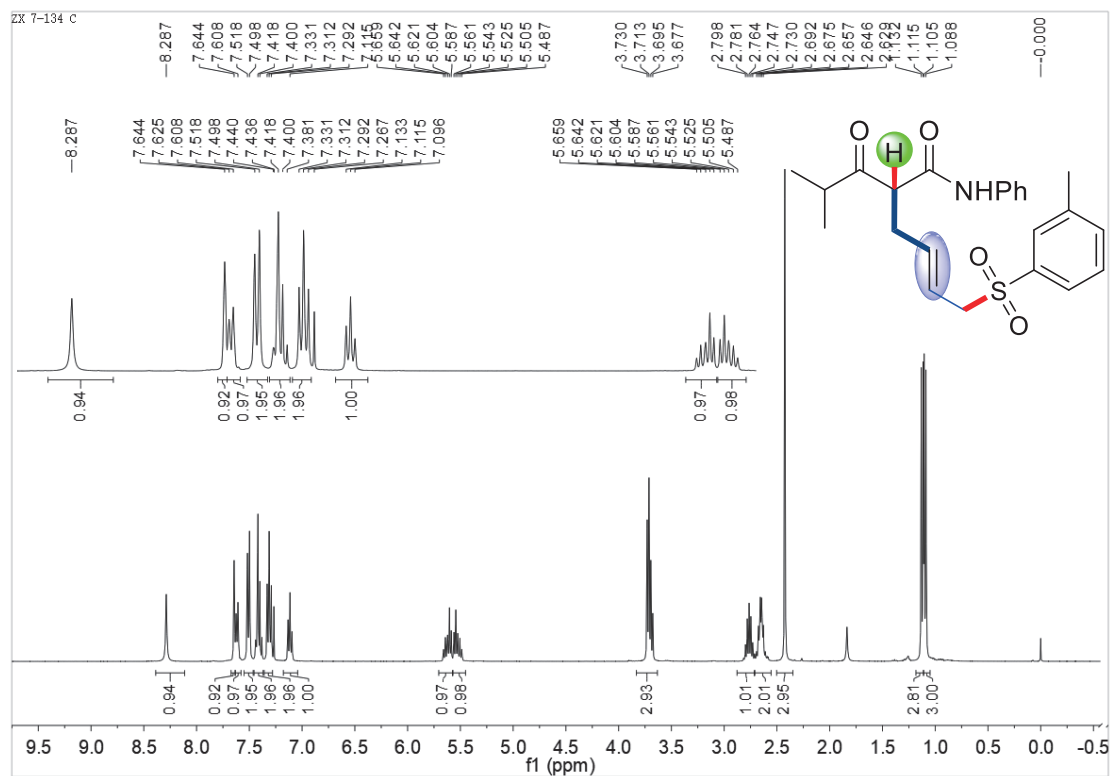

### 4s2, <sup>13</sup>C NMR

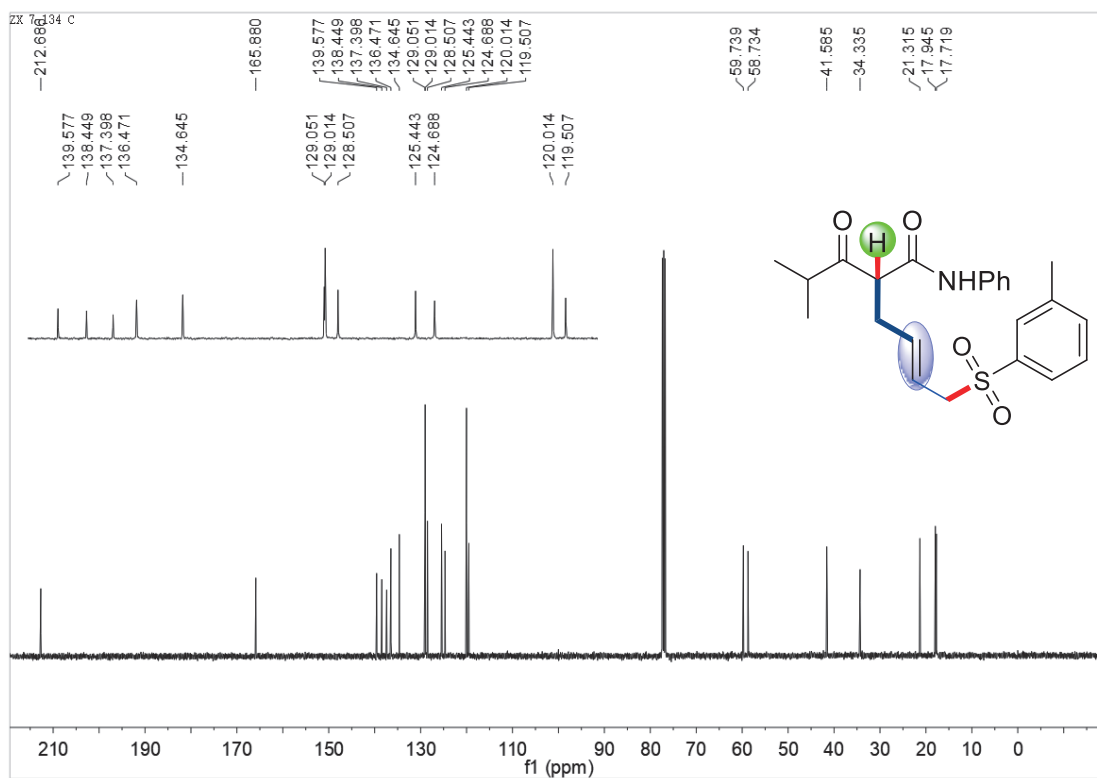

### 4s2, DEPT 90 and DEPT 135

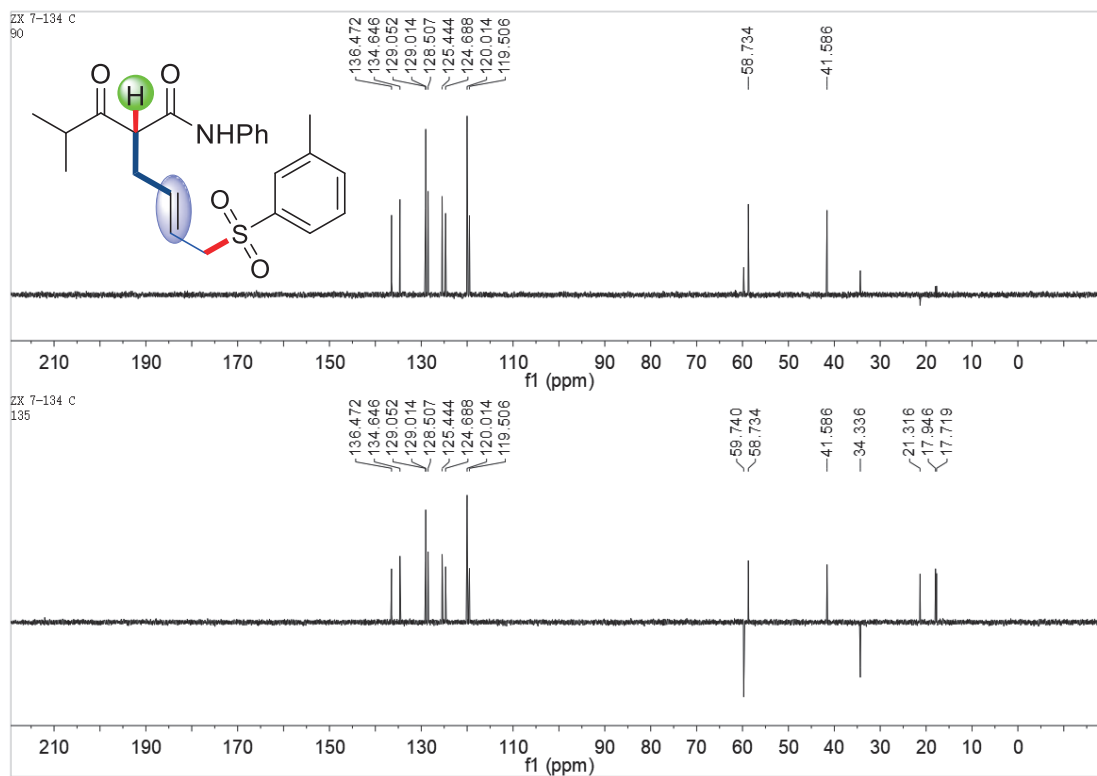



### 4t1, <sup>1</sup>H NMR

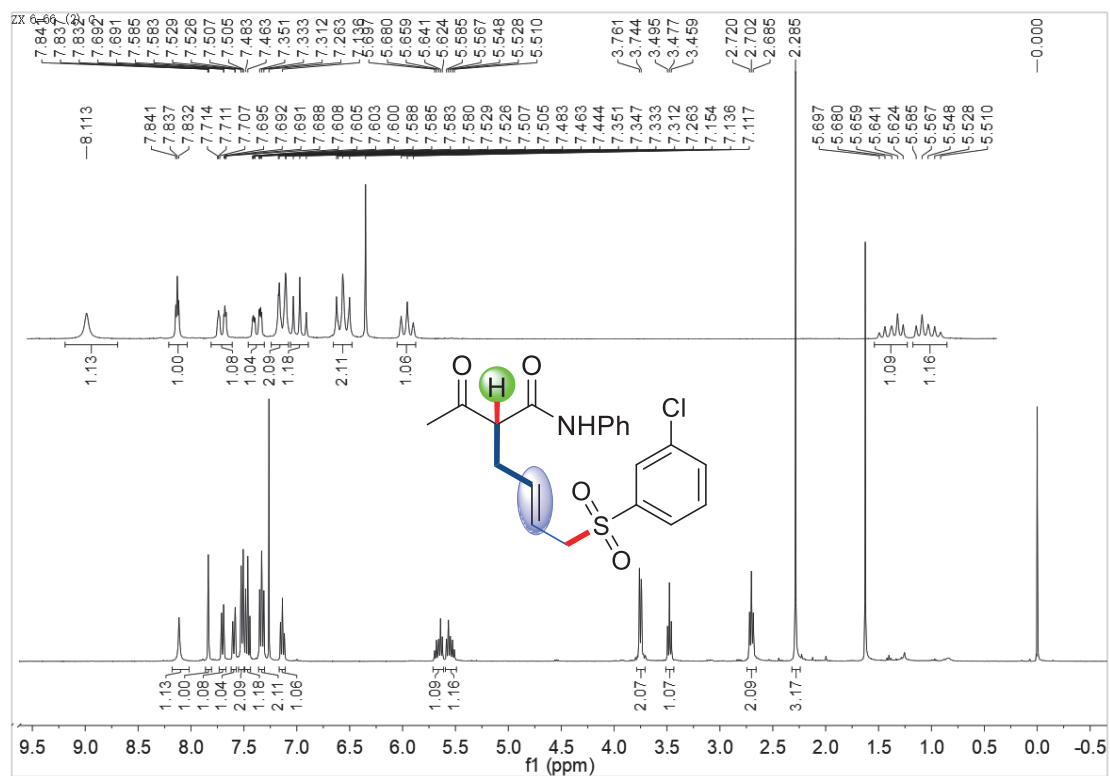

### 4t1, <sup>13</sup>C NMR

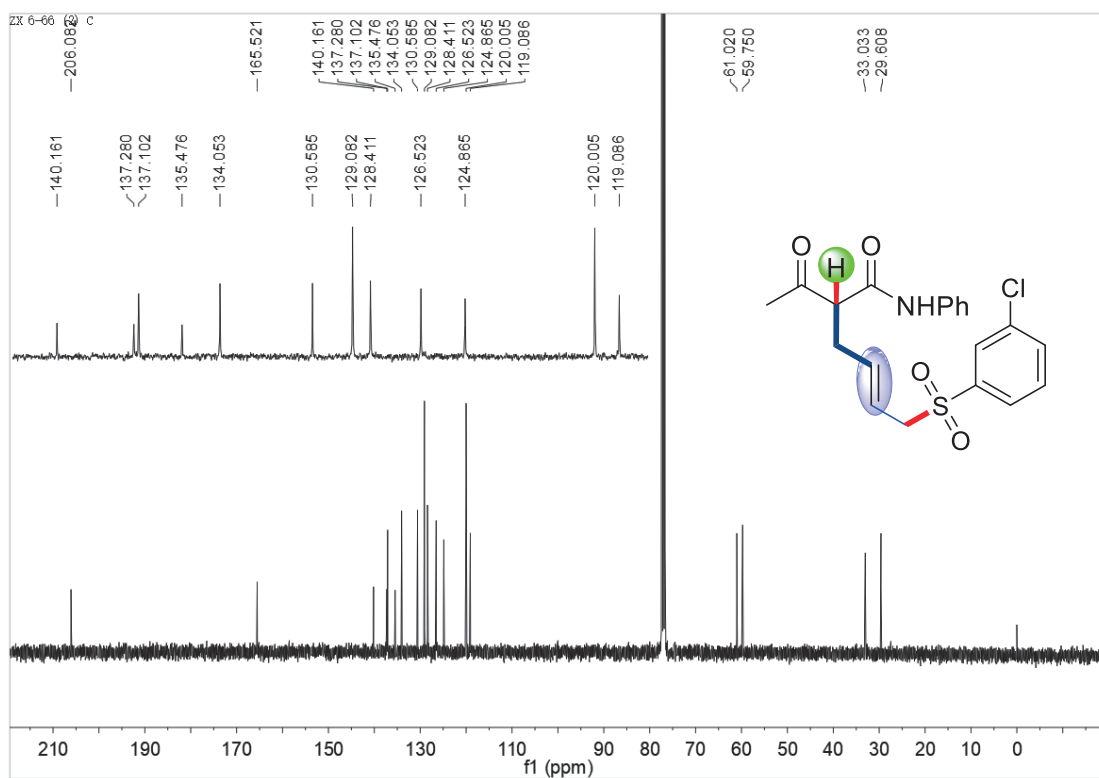

**4t1, DEPT 90 and DEPT 135**

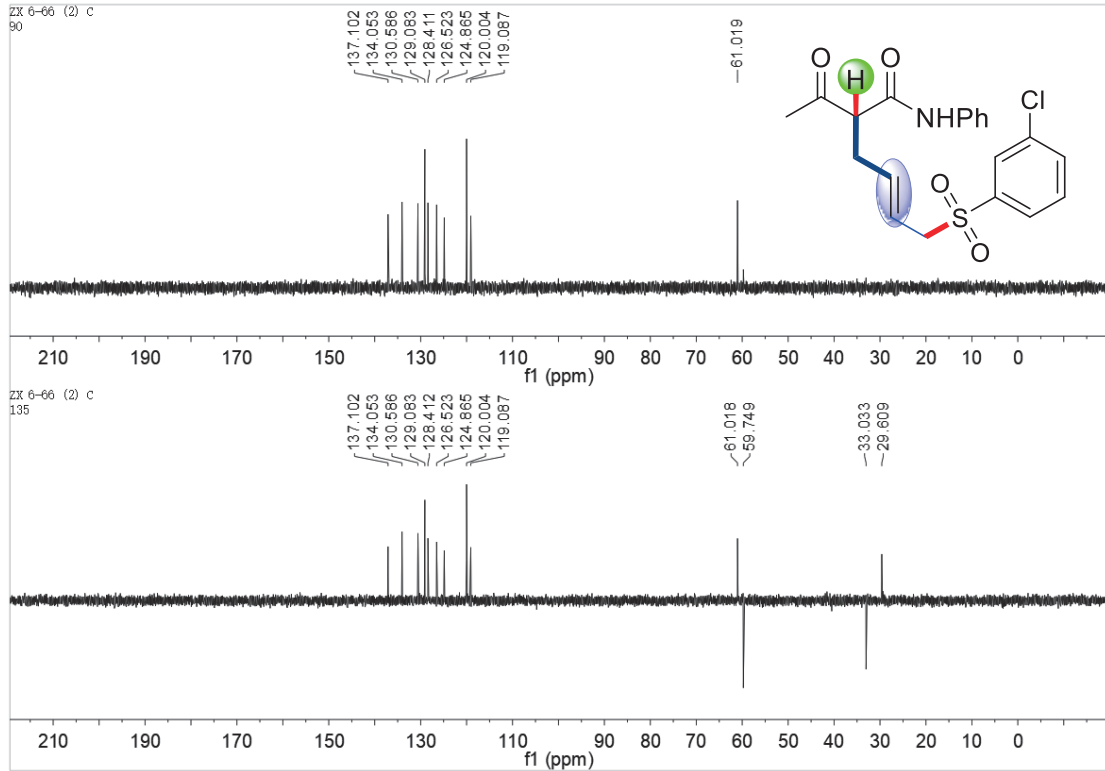

**4t2, <sup>1</sup>H NMR**

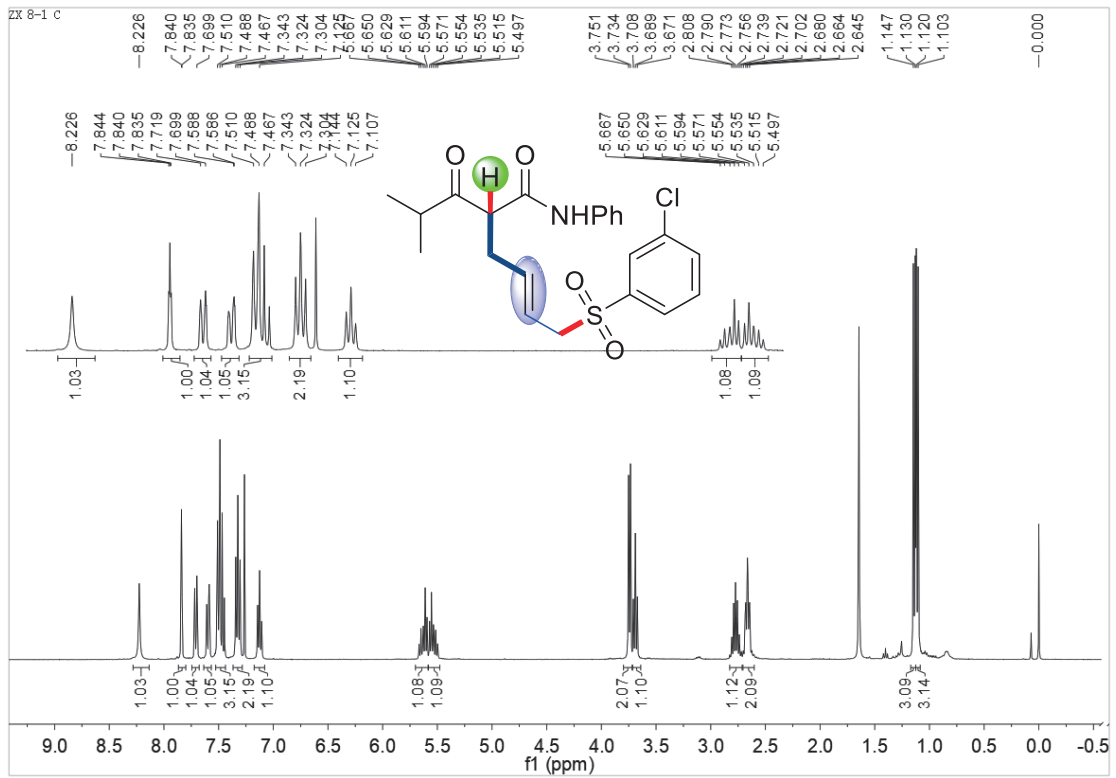

4t2, <sup>13</sup>C NMR

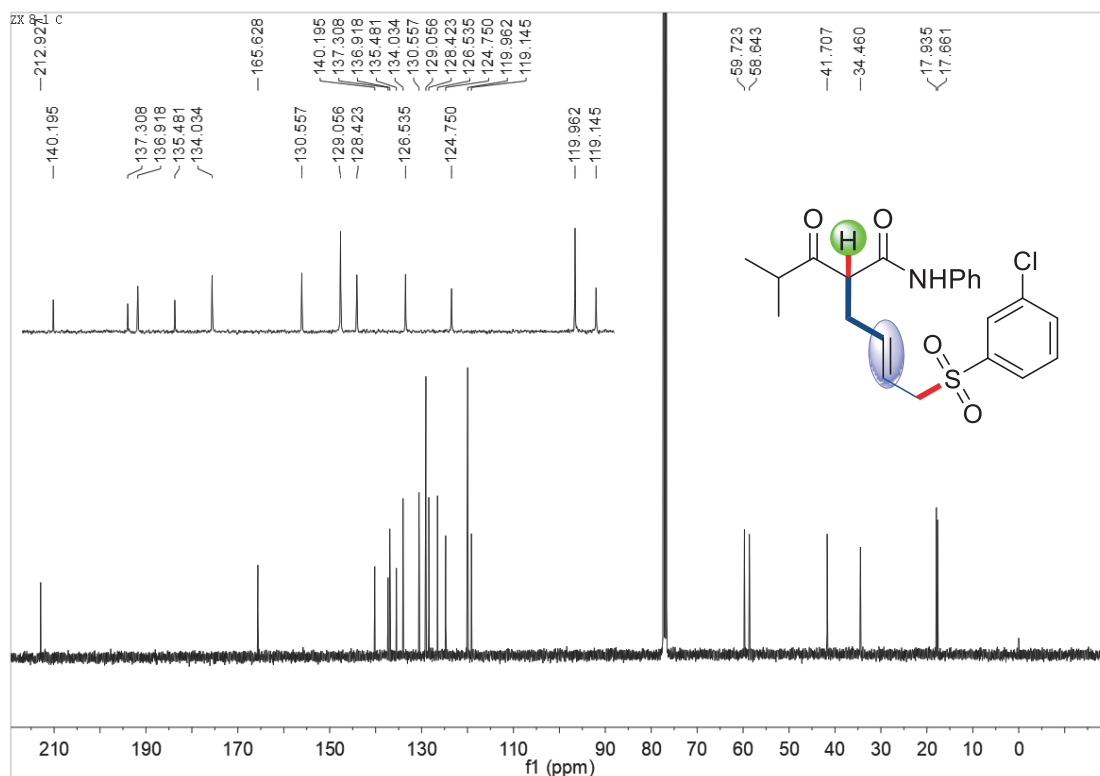

4t2, DEPT 90 and DEPT 135

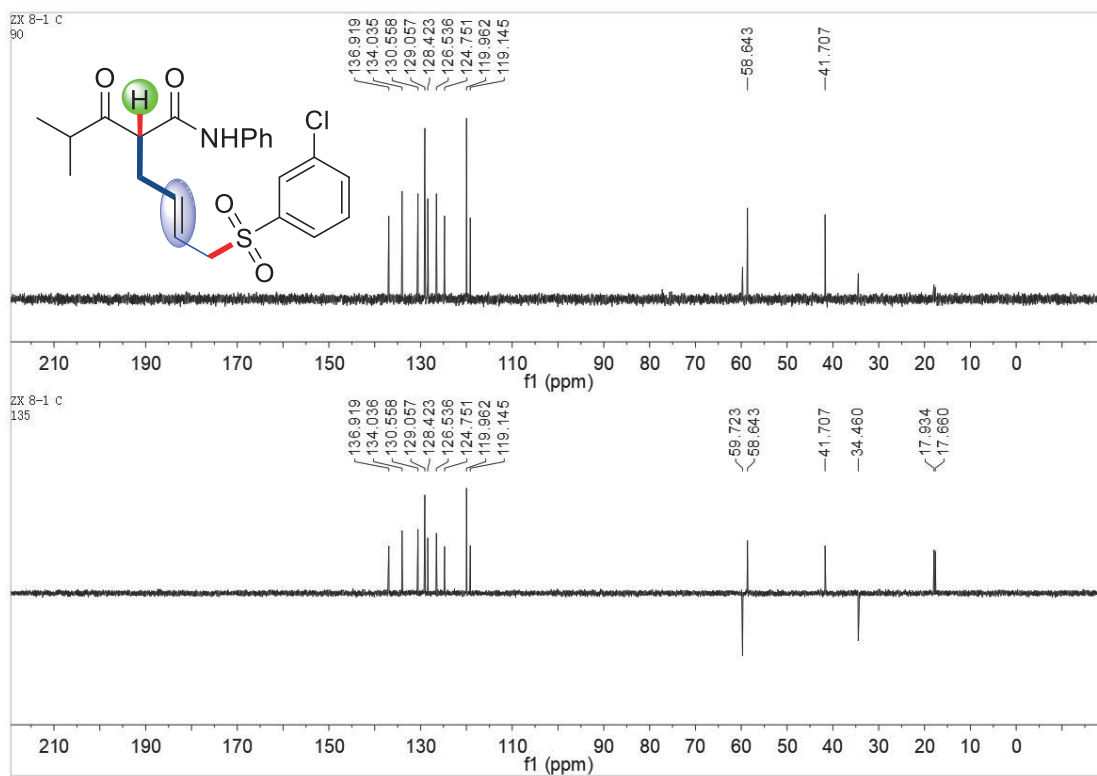

### 4u1, <sup>1</sup>H NMR

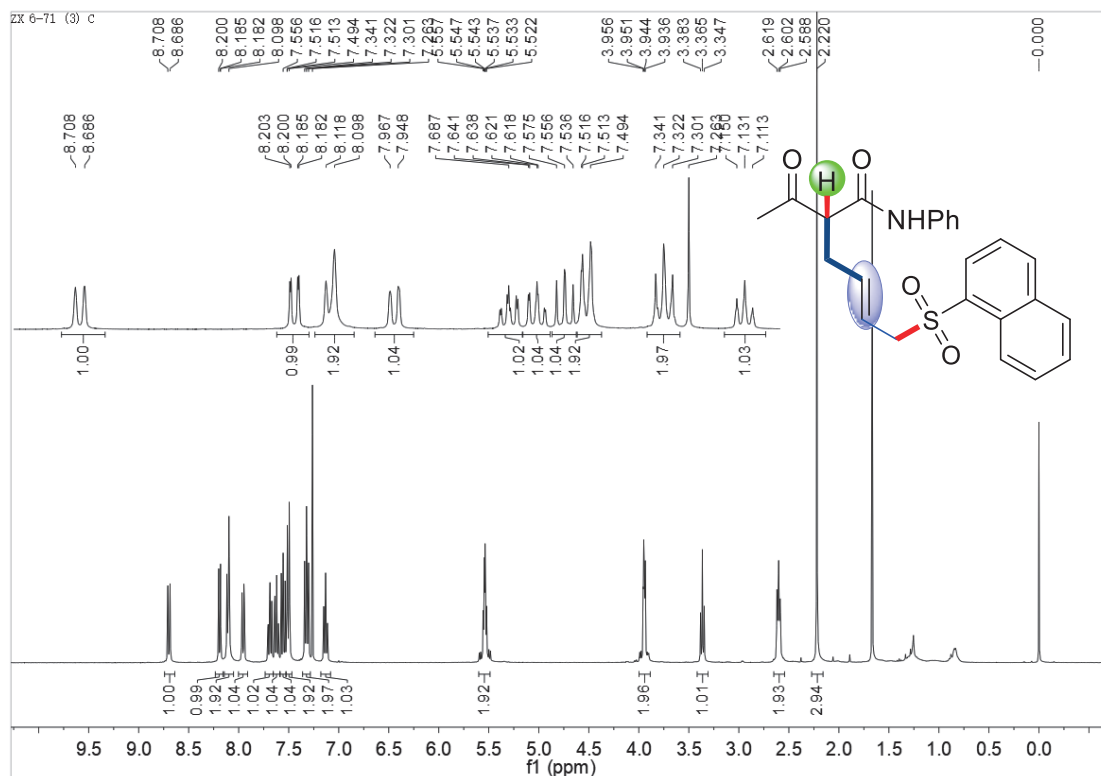

### 4u1, <sup>13</sup>C NMR

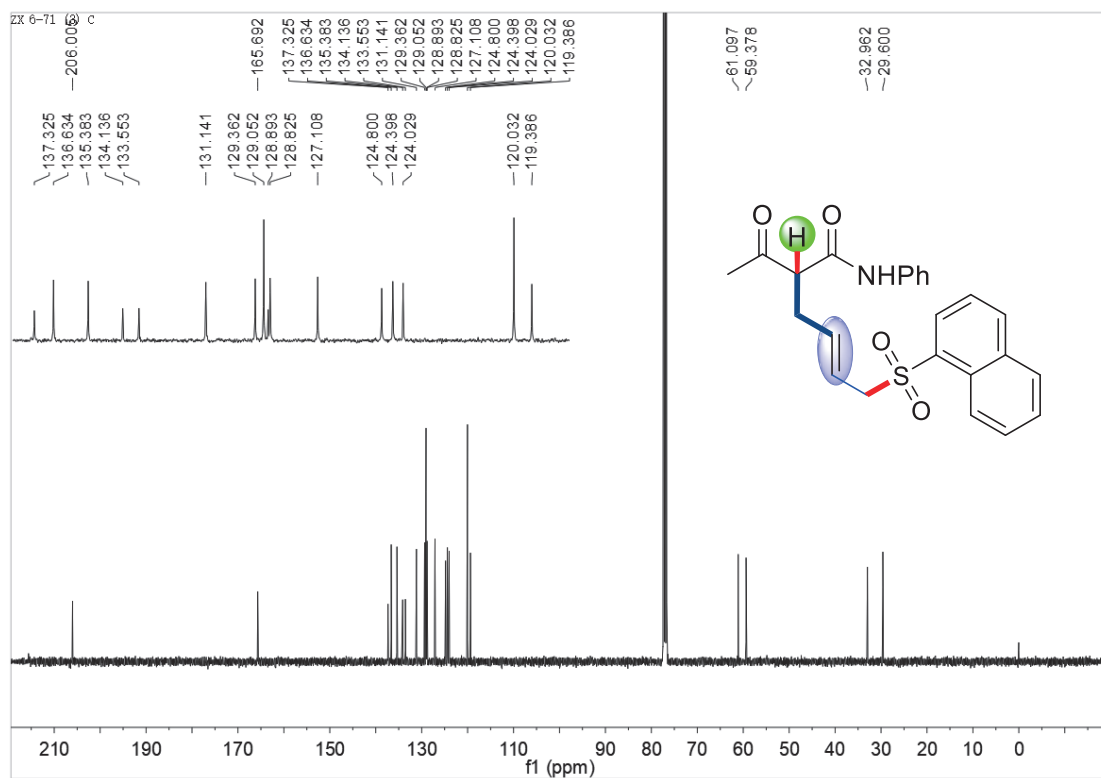

### 4u1, DEPT 90 and DEPT 135

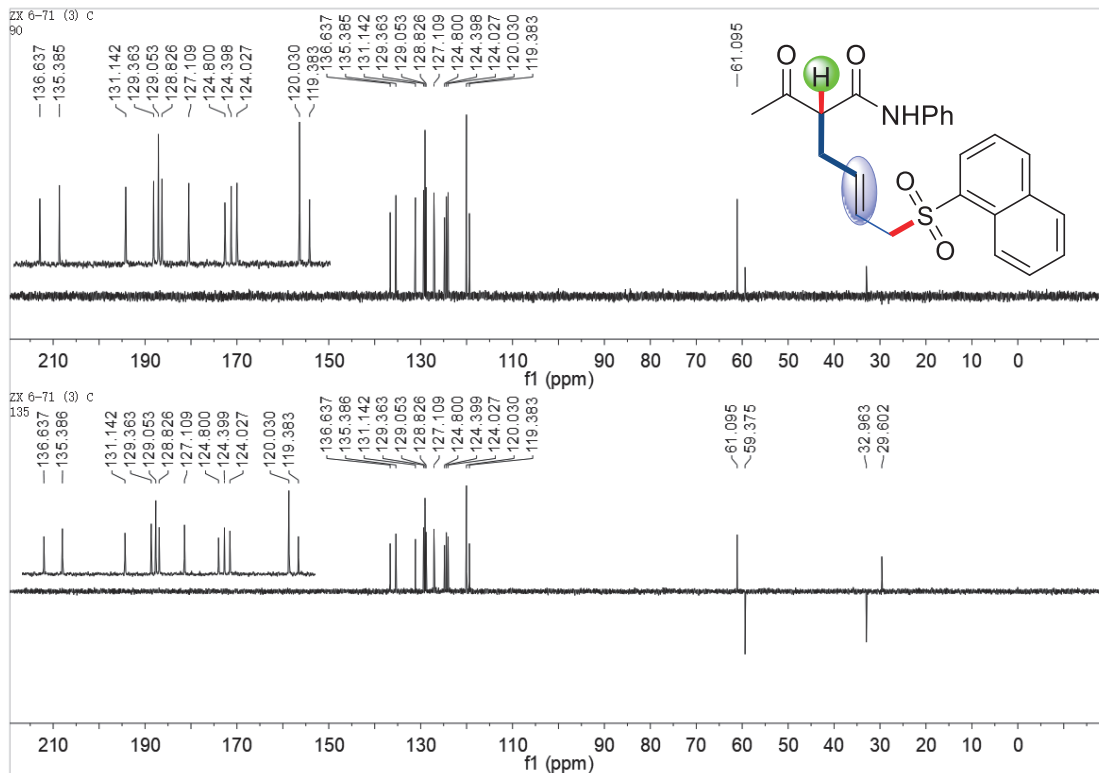

### 4u2, <sup>1</sup>H NMR

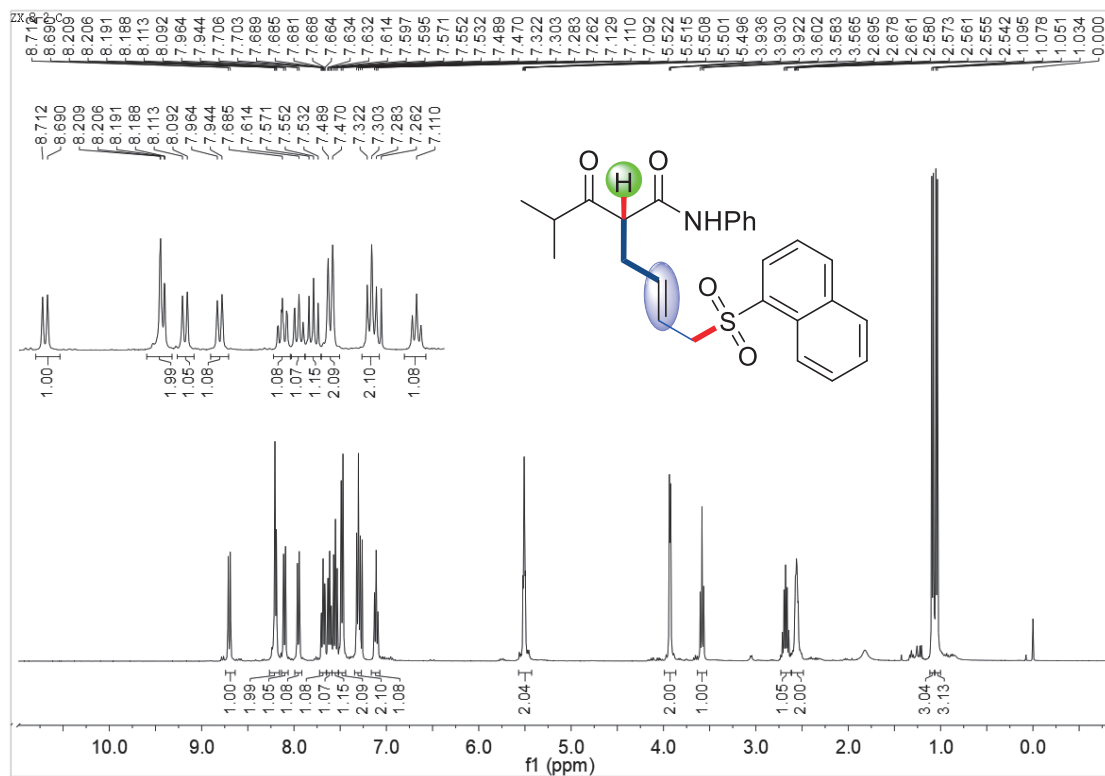

### 4u2, <sup>13</sup>C NMR

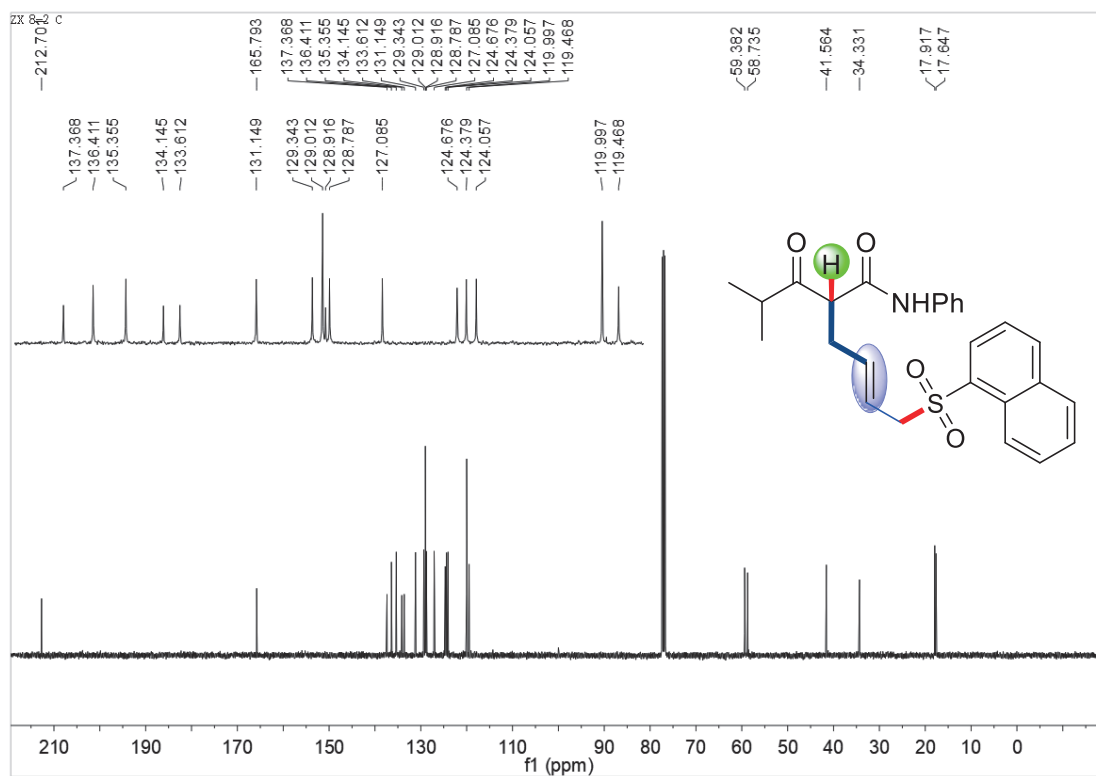

### 4u2, DEPT 90 and DEPT 135

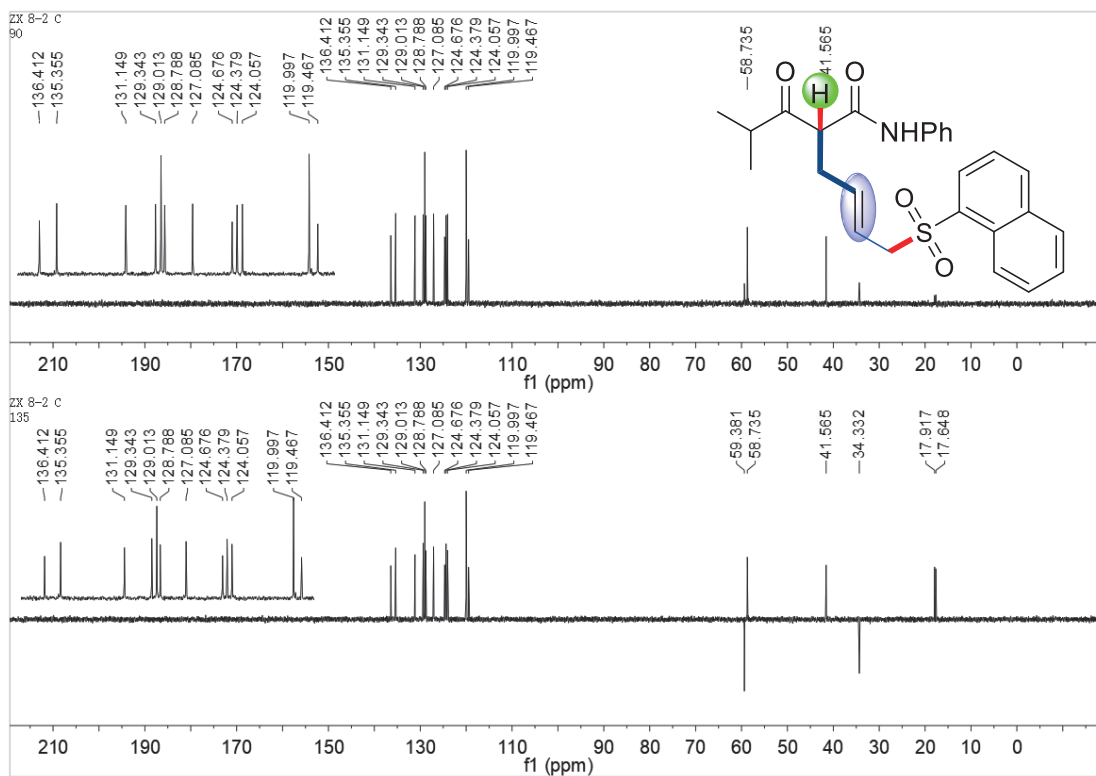

### 4v1, <sup>1</sup>H NMR

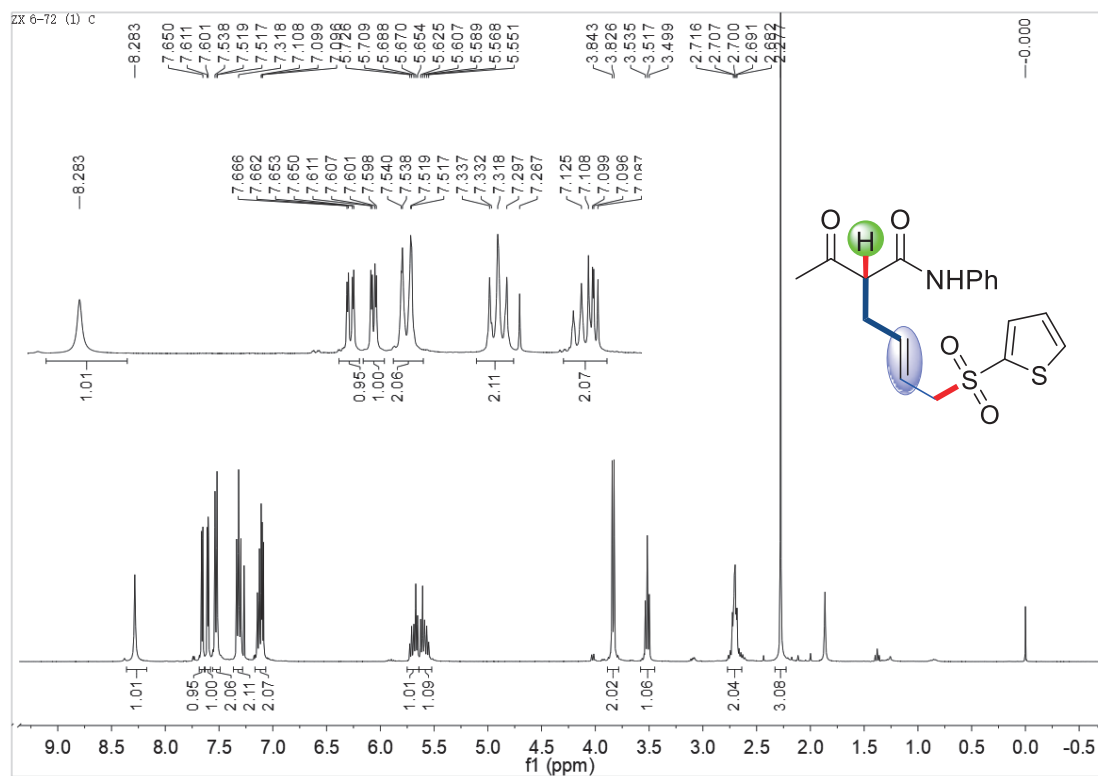

### 4v1, <sup>13</sup>C NMR

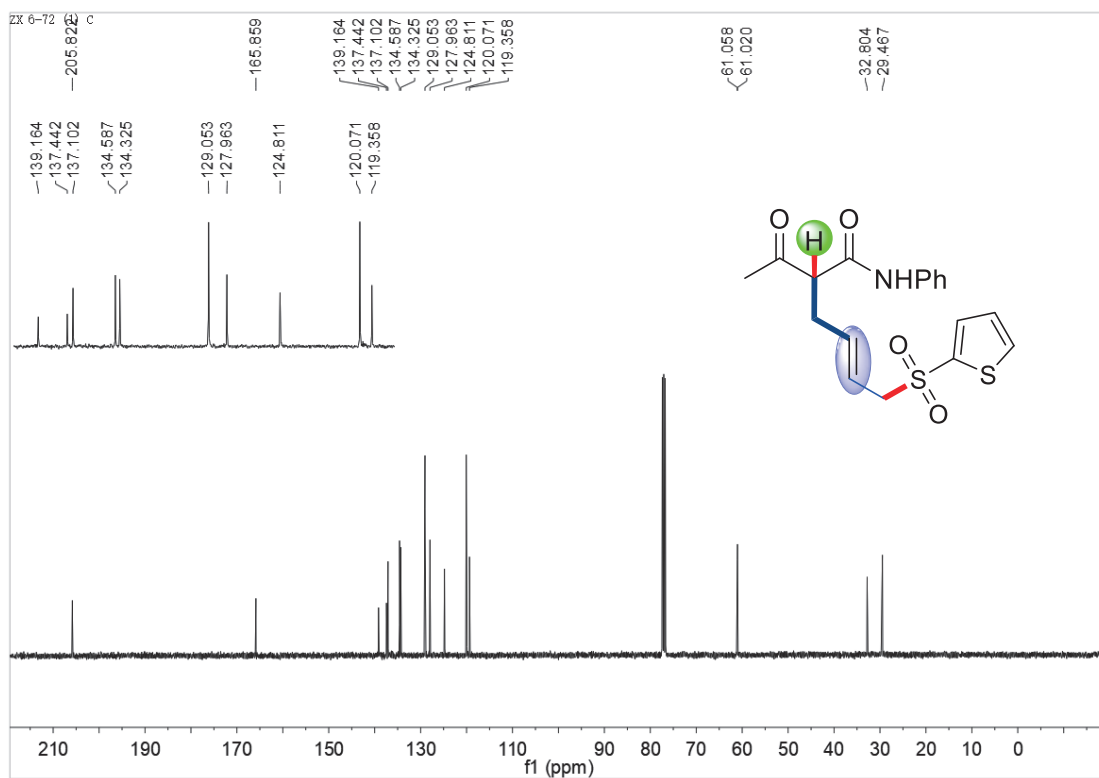

### 4v1, DEPT 90 and DEPT 135

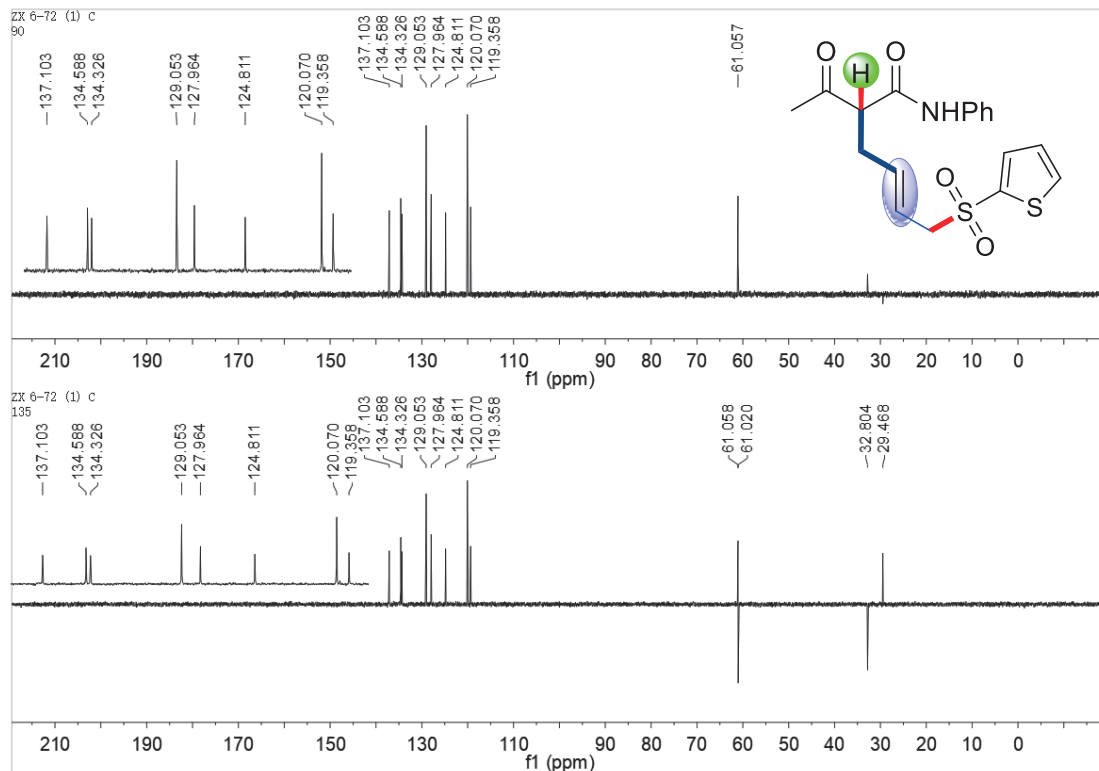

### 4v2, <sup>1</sup>H NMR

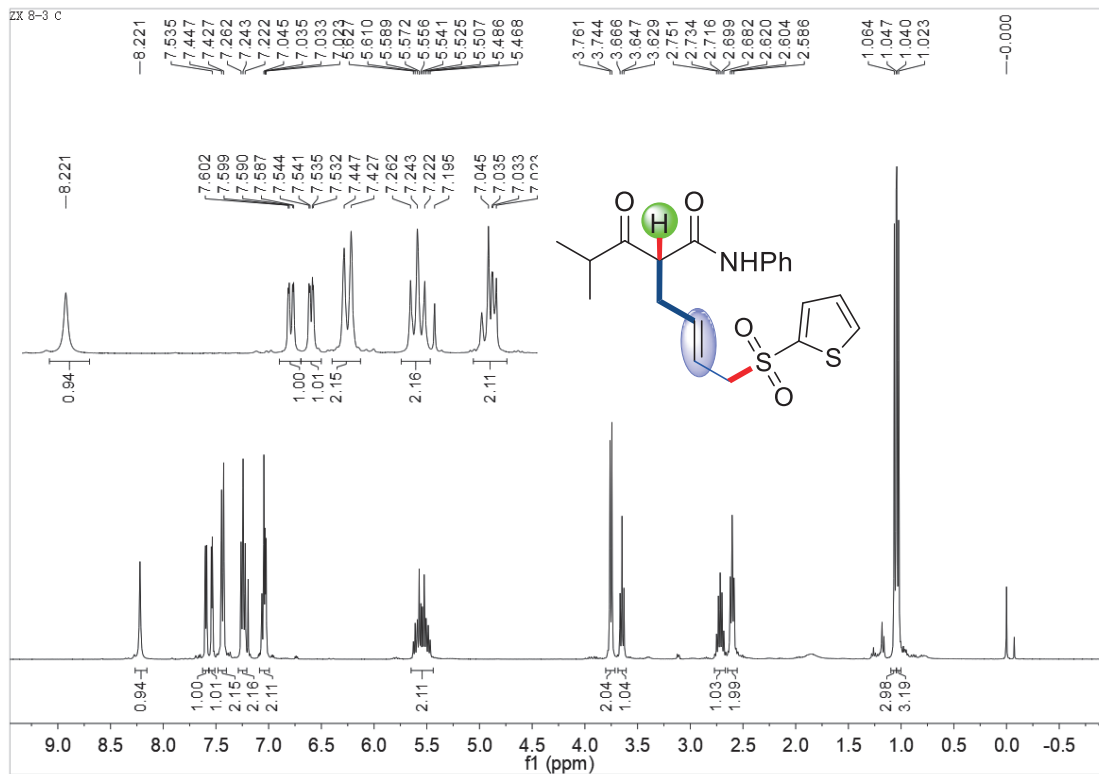



### 4v2, <sup>13</sup>C NMR

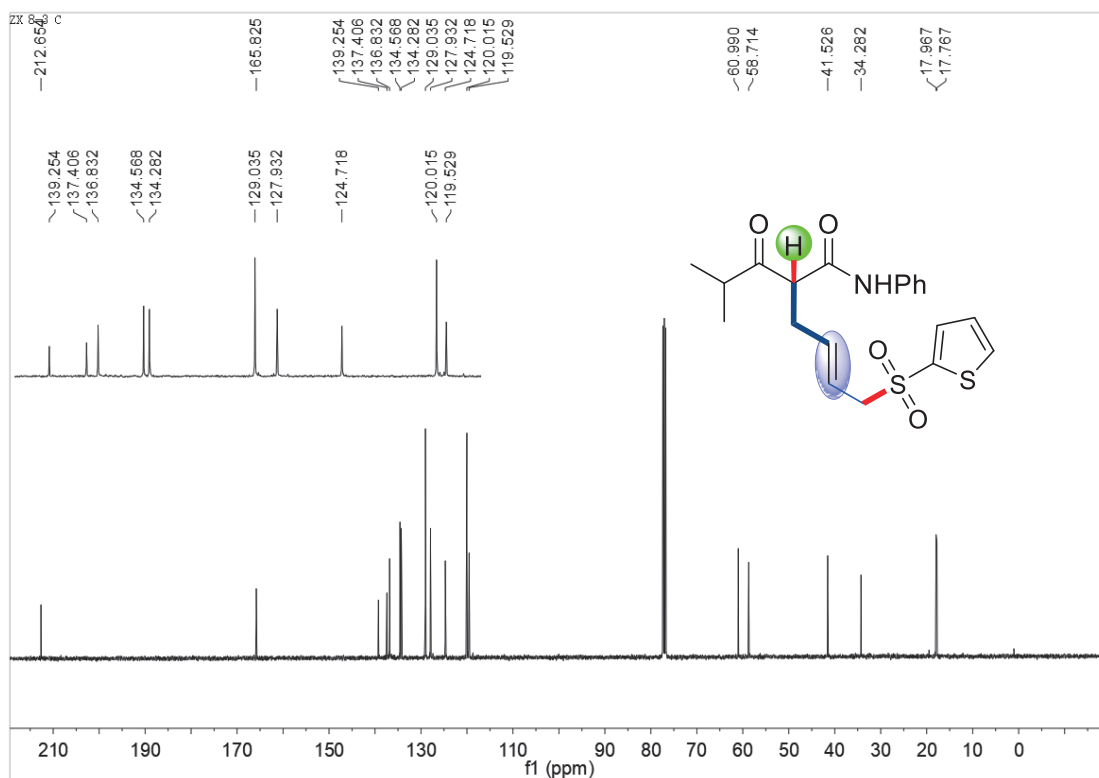

### 4v2, DEPT 90 and DEPT 135

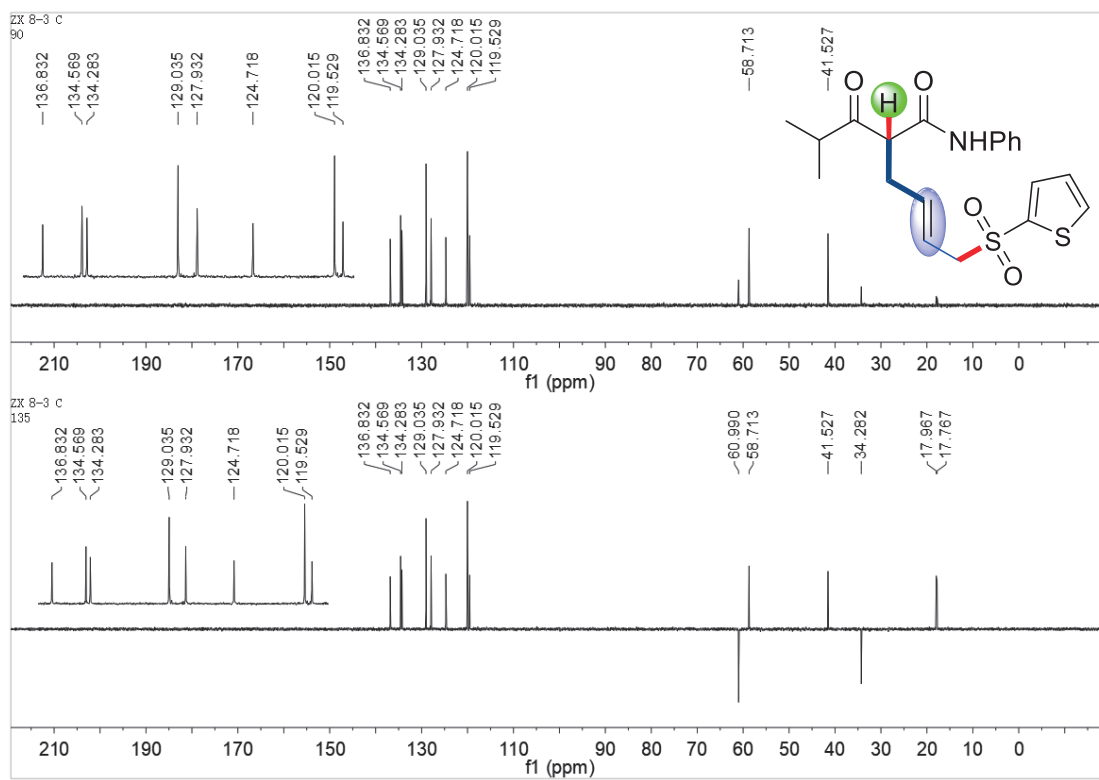

### 4w1, <sup>1</sup>H NMR

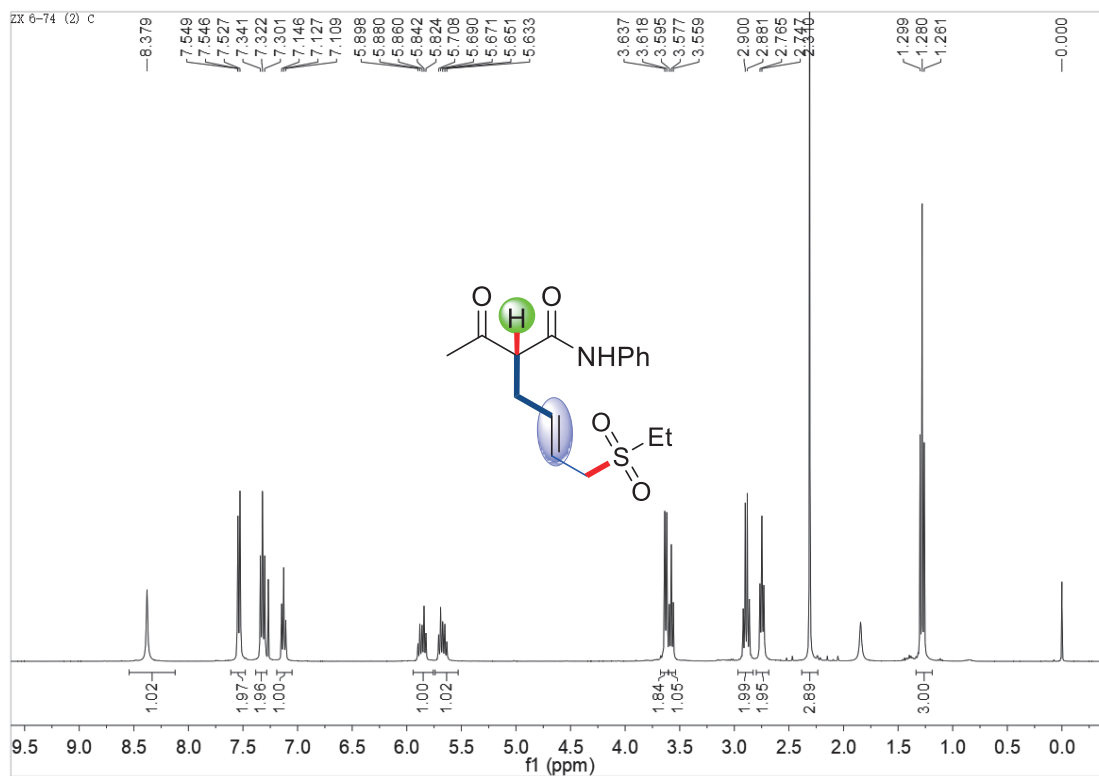

### 4w1, <sup>13</sup>C NMR

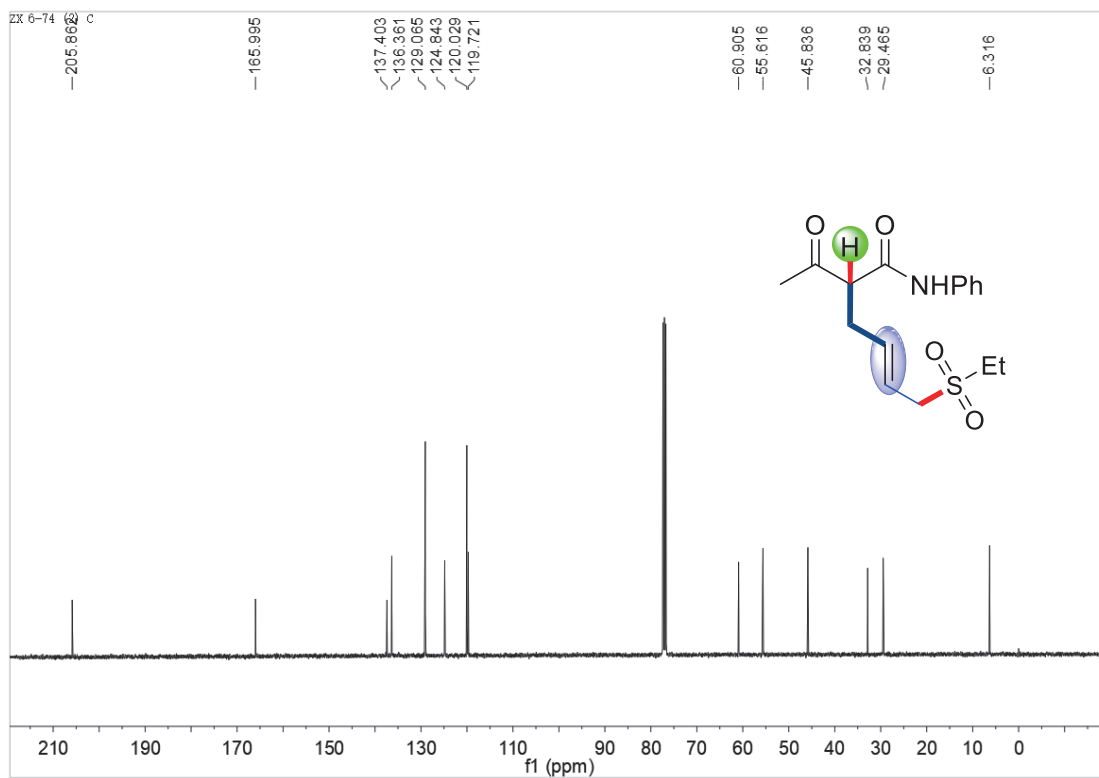

4w1, DEPT 90 and DEPT 135

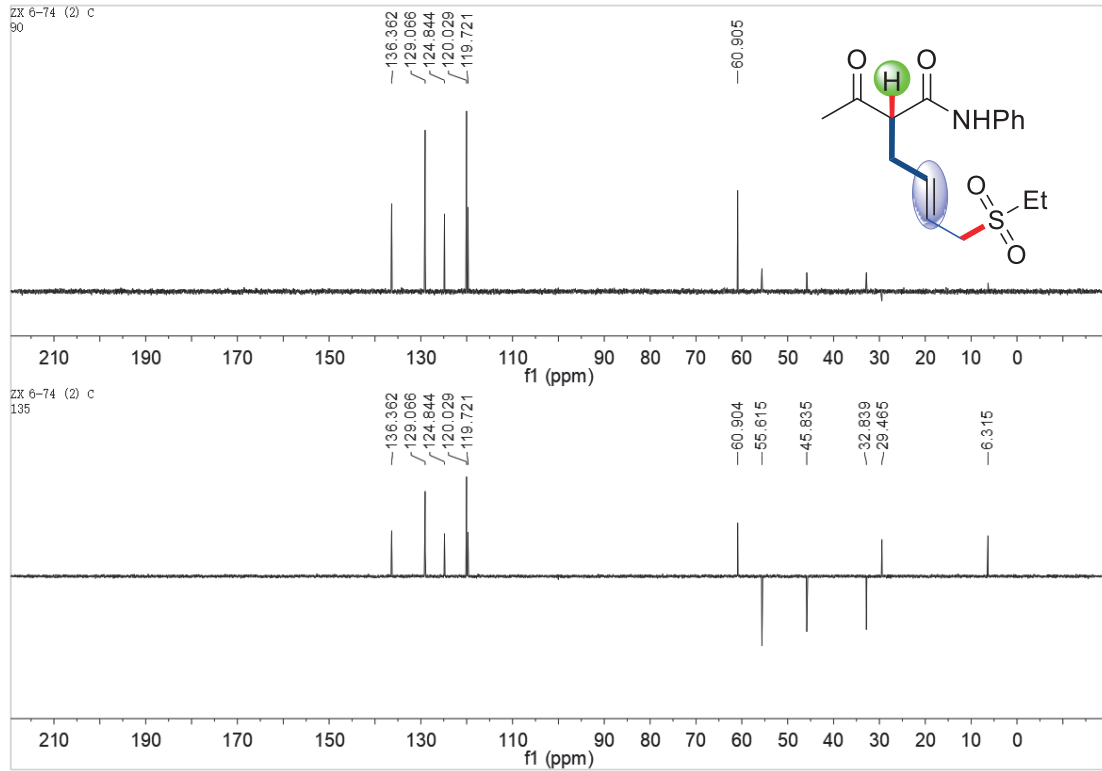

4w2, <sup>1</sup>H NMR

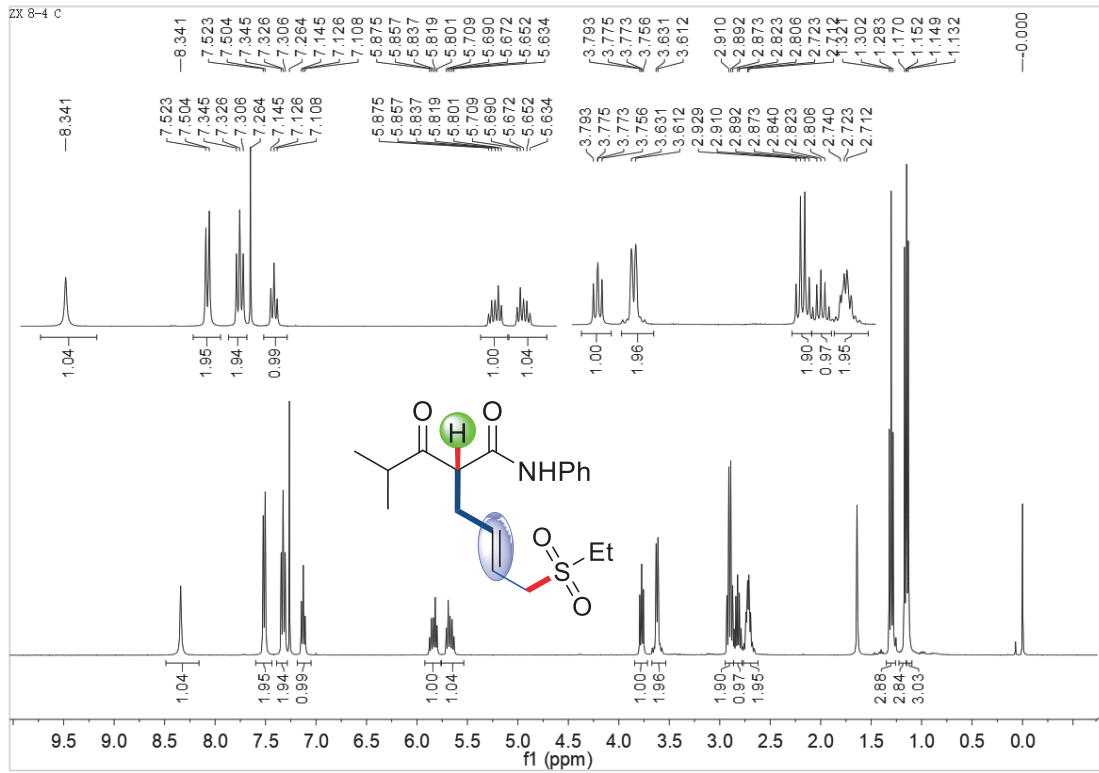

### 4w2, <sup>13</sup>C NMR

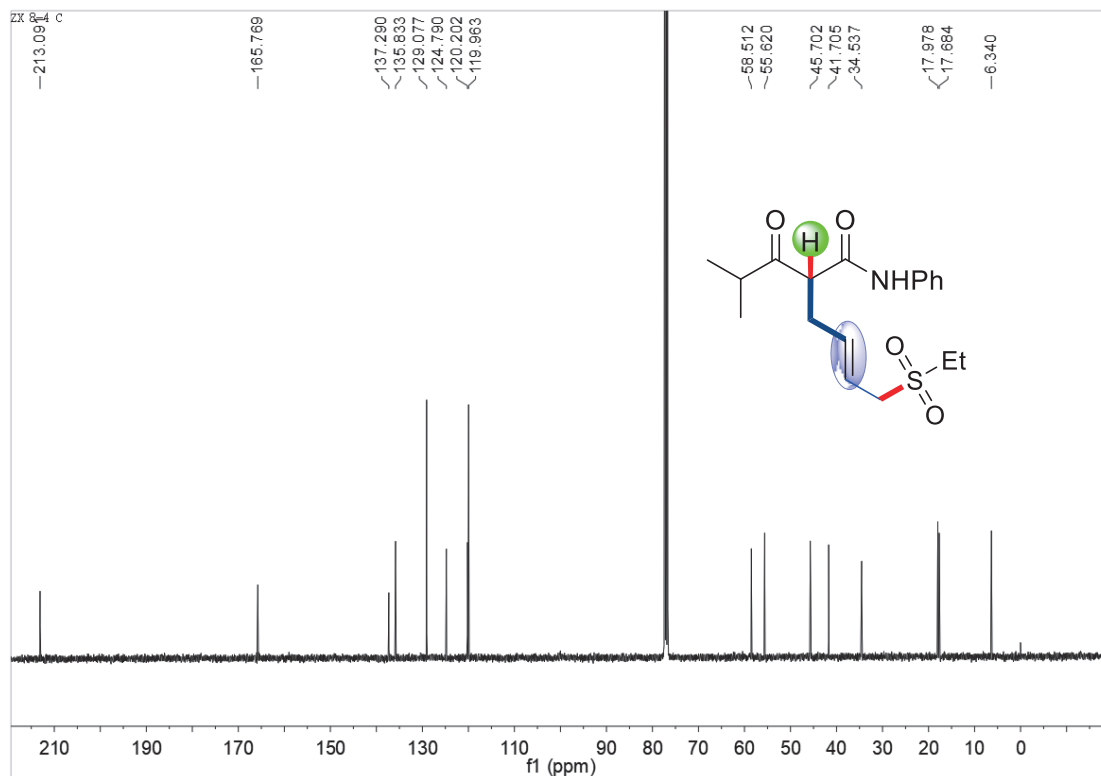

### 4w2, DEPT 90 and DEPT 135

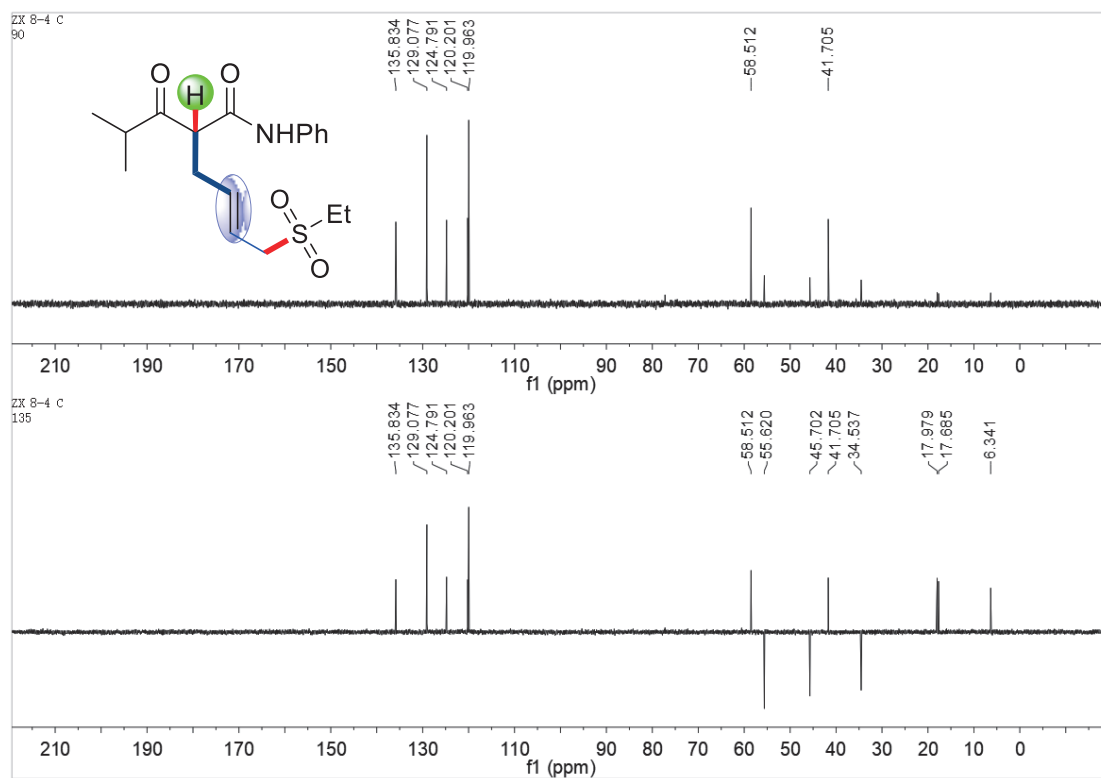

### 4x, <sup>1</sup>H NMR

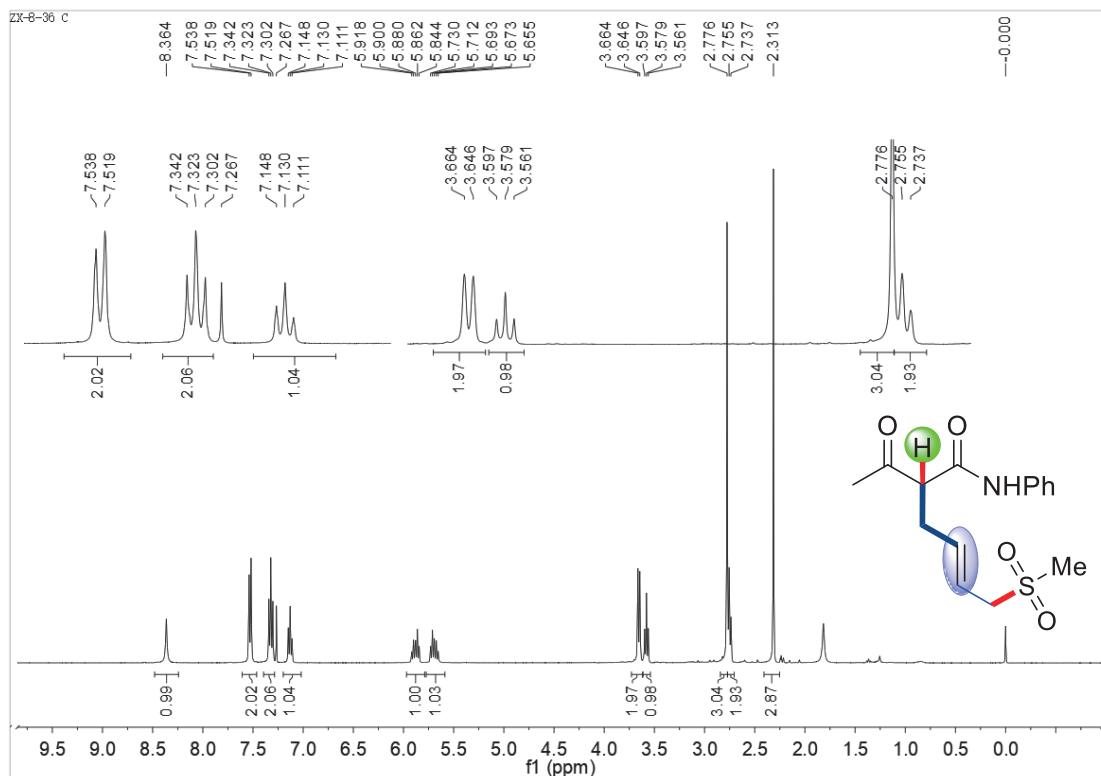

### 4x, <sup>13</sup>C NMR

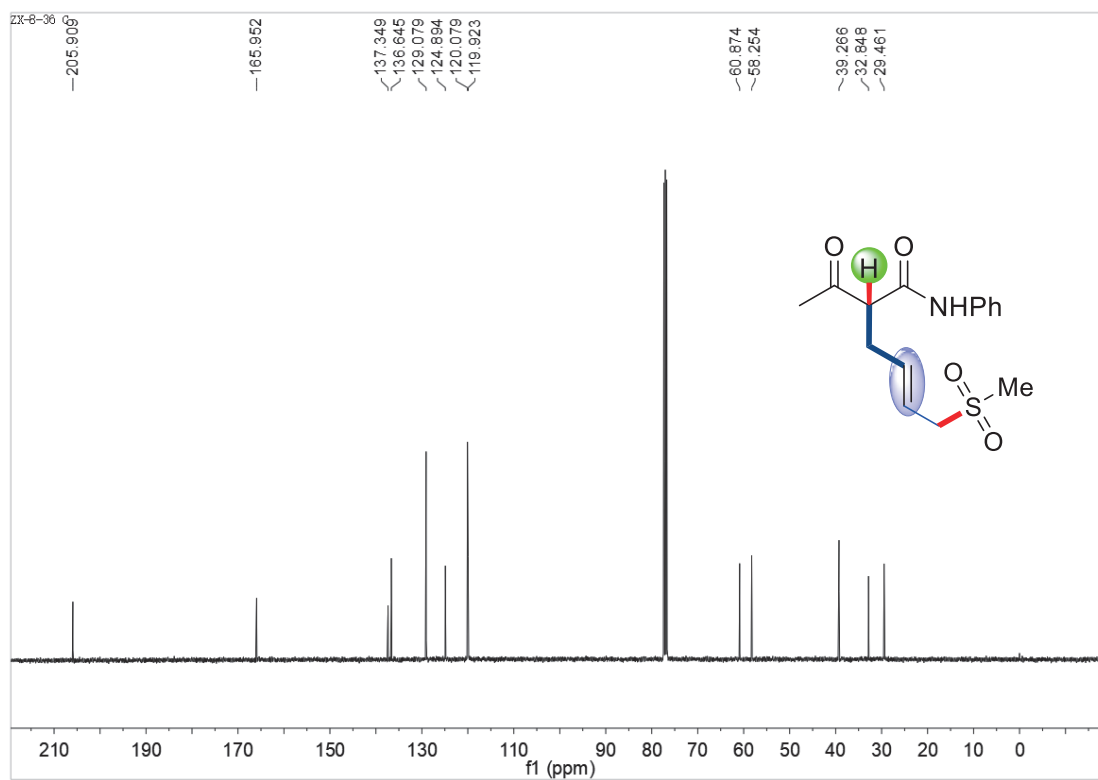

4x, DEPT 90 and DEPT 135

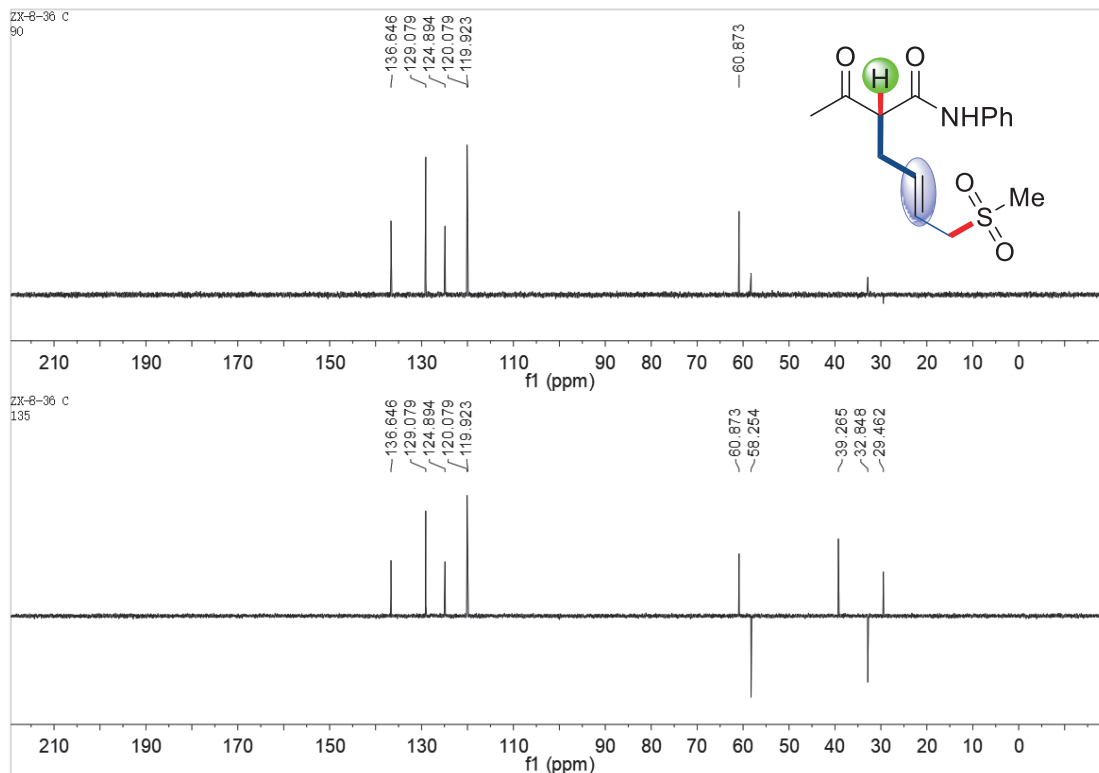

4y, <sup>1</sup>H NMR

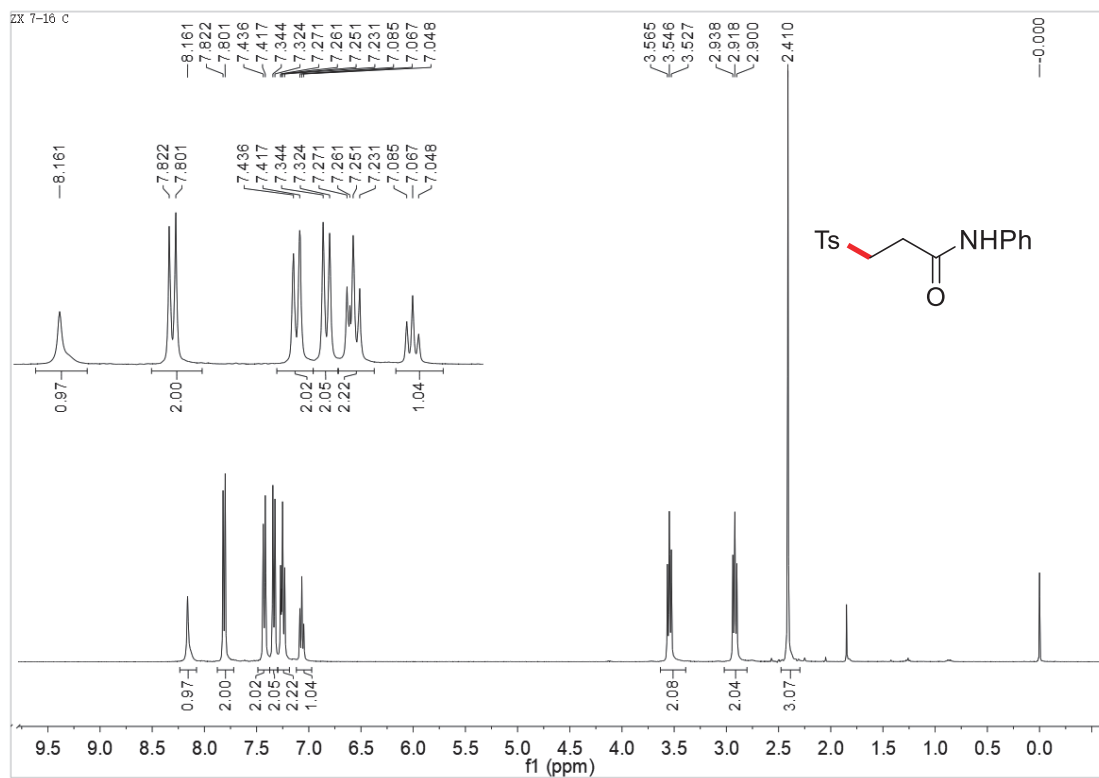

### 4y, <sup>13</sup>C NMR

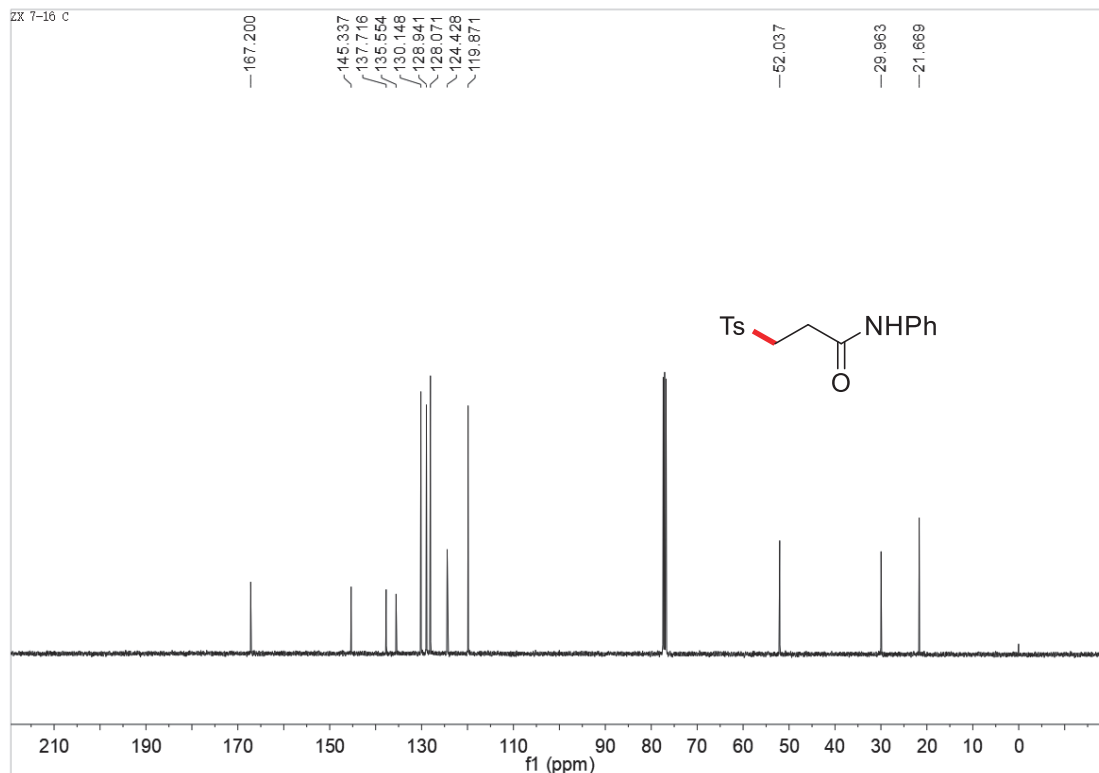

### 4y, DEPT 90 and DEPT 135

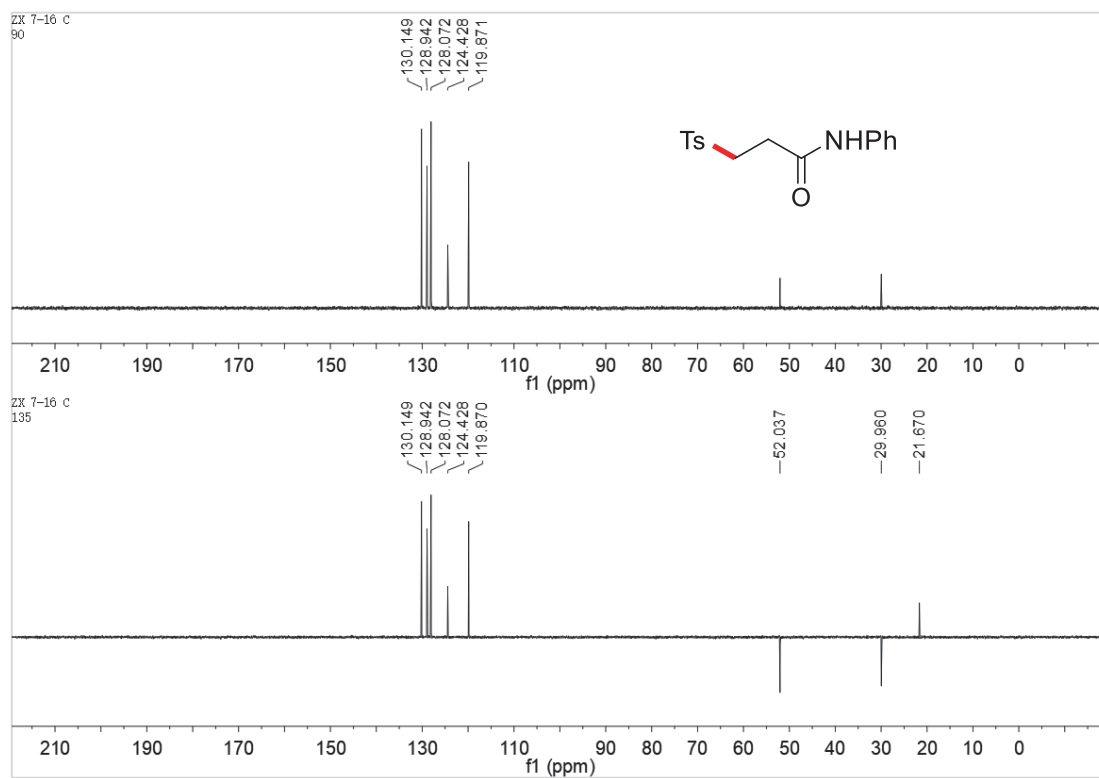

4z, <sup>1</sup>H NMR

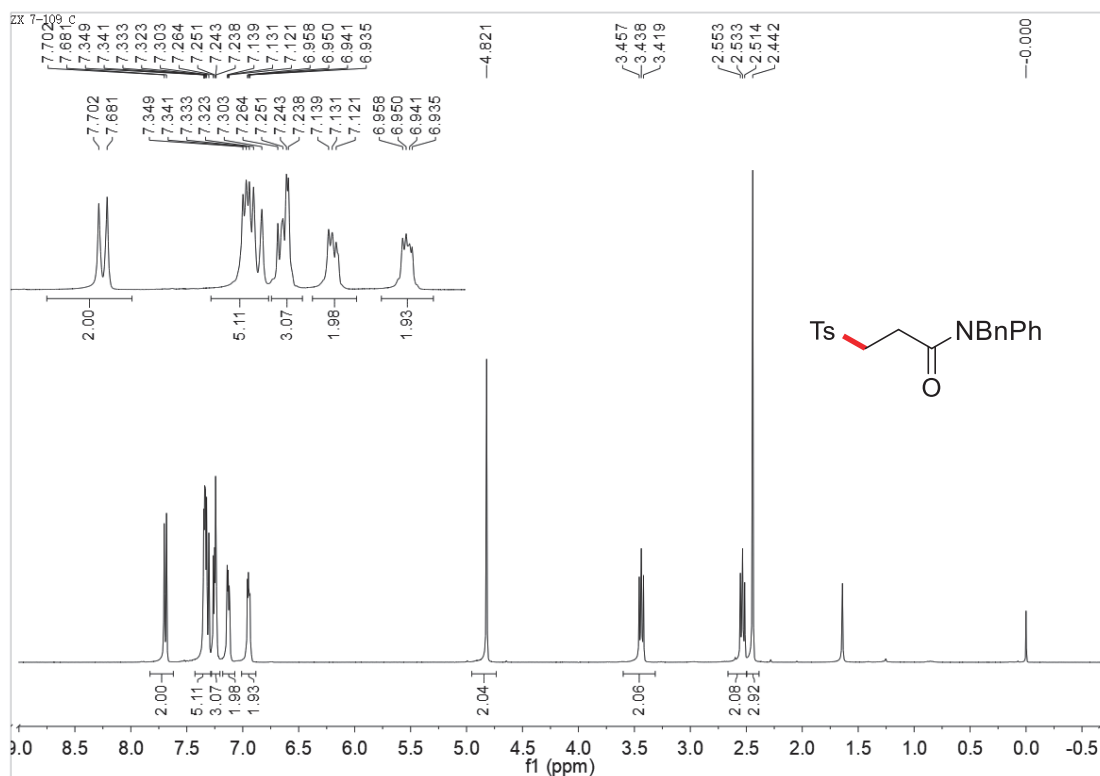

4z, <sup>13</sup>C NMR

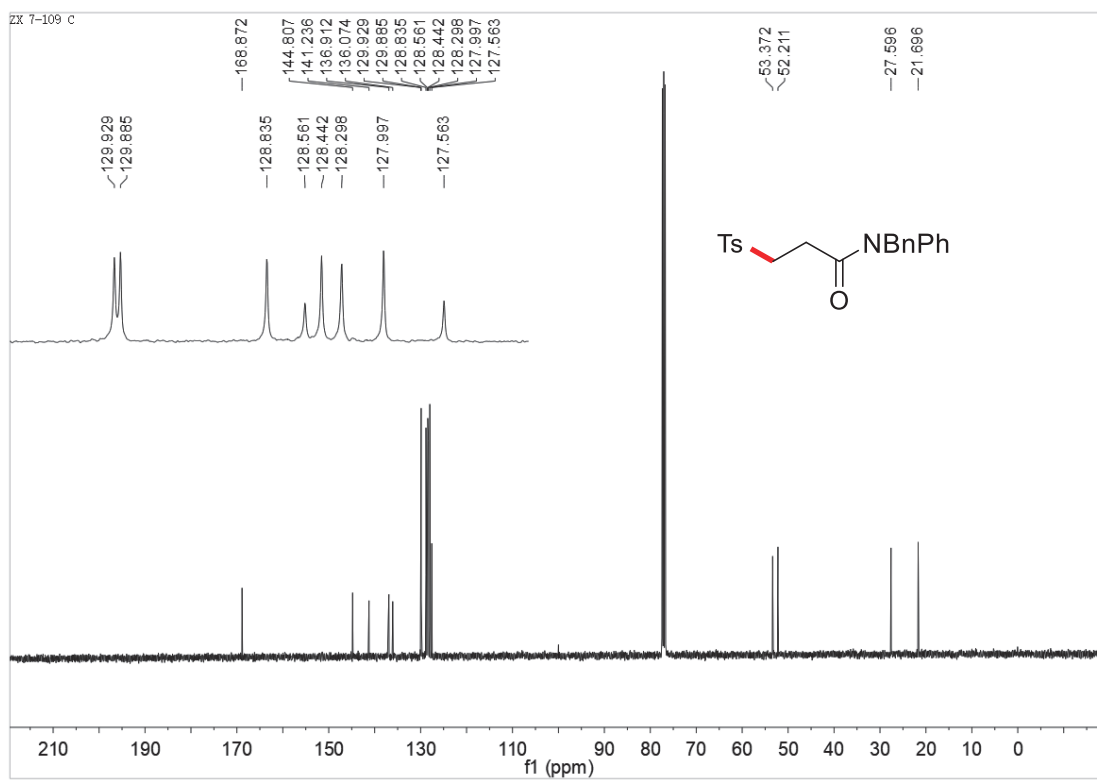



4z, DEPT 90 and DEPT 135

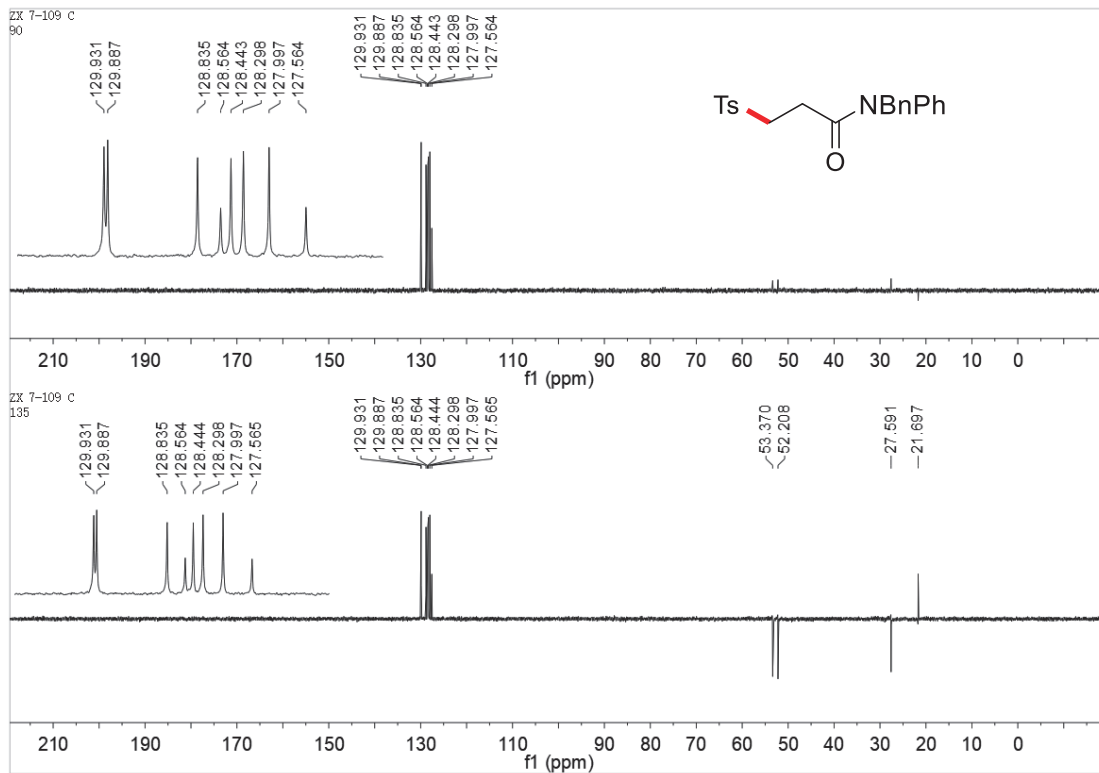

5a, <sup>1</sup>H NMR

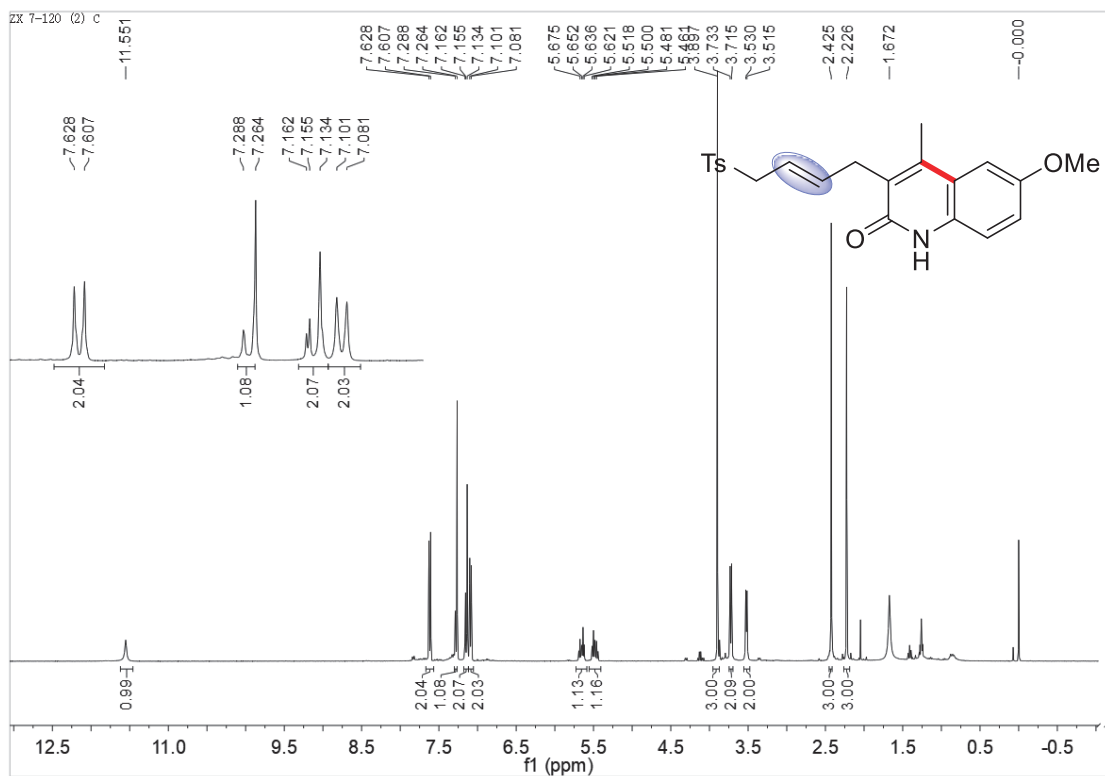

### 5a, <sup>13</sup>C NMR

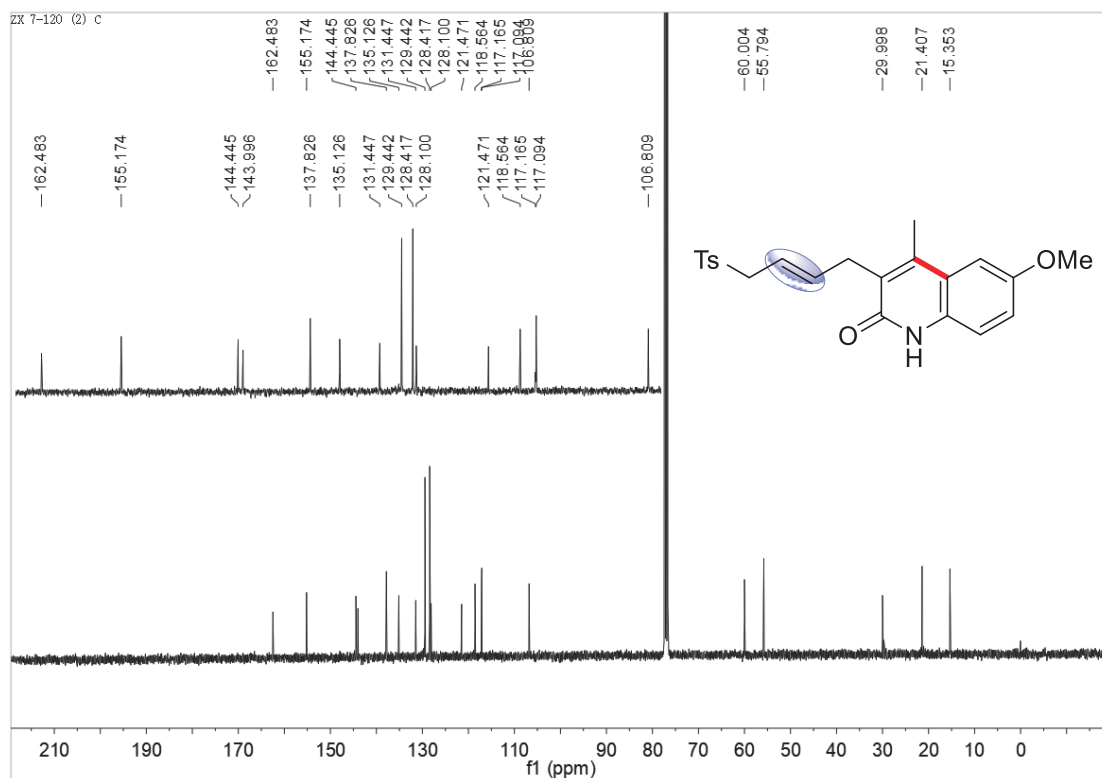

### 5a, DEPT 90 and DEPT 135

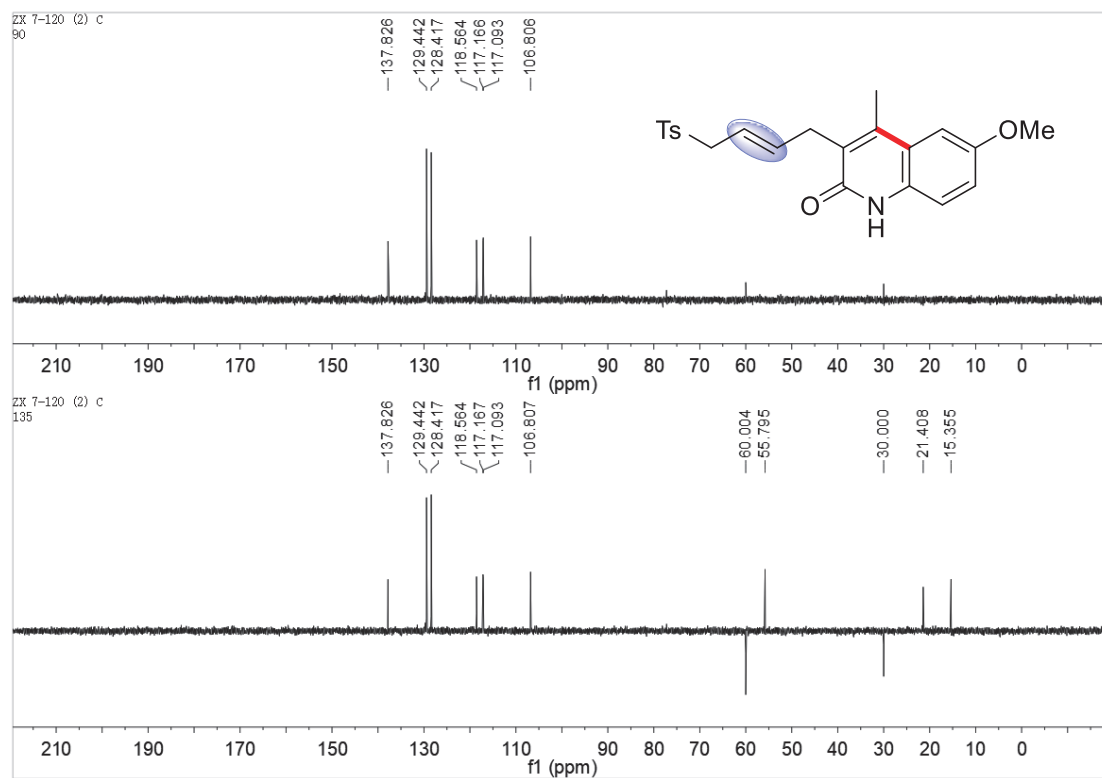

### 5b, <sup>1</sup>H NMR

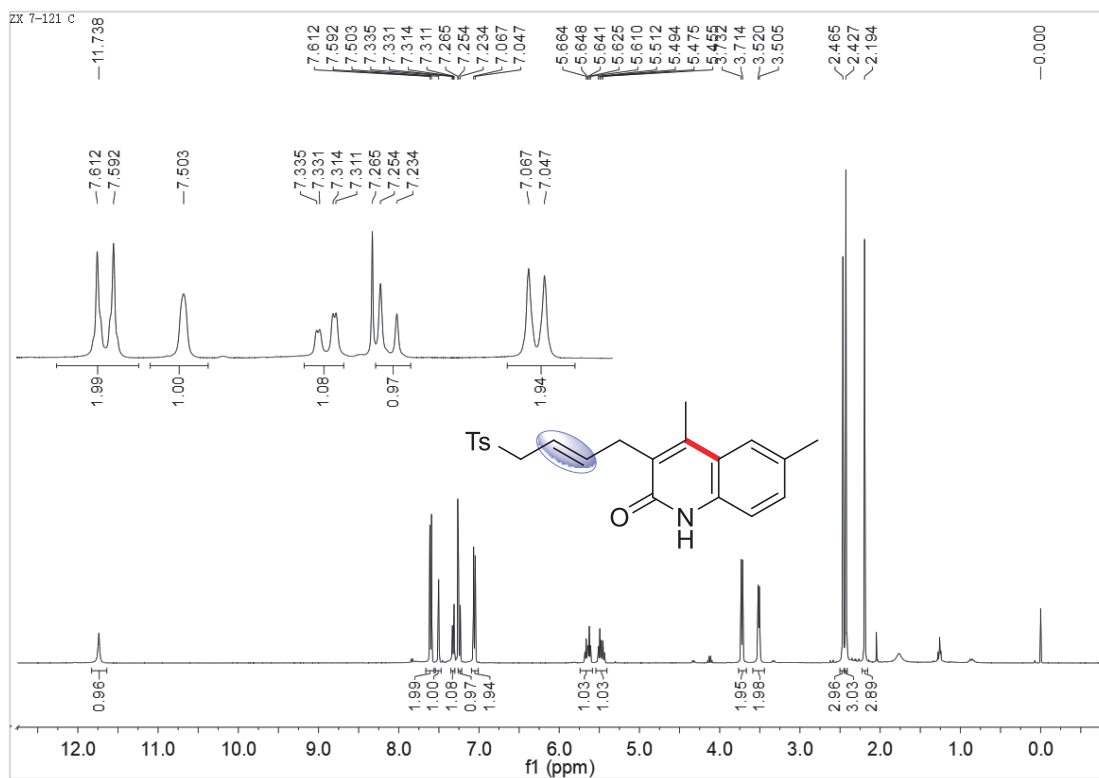

### 5b, <sup>13</sup>C NMR

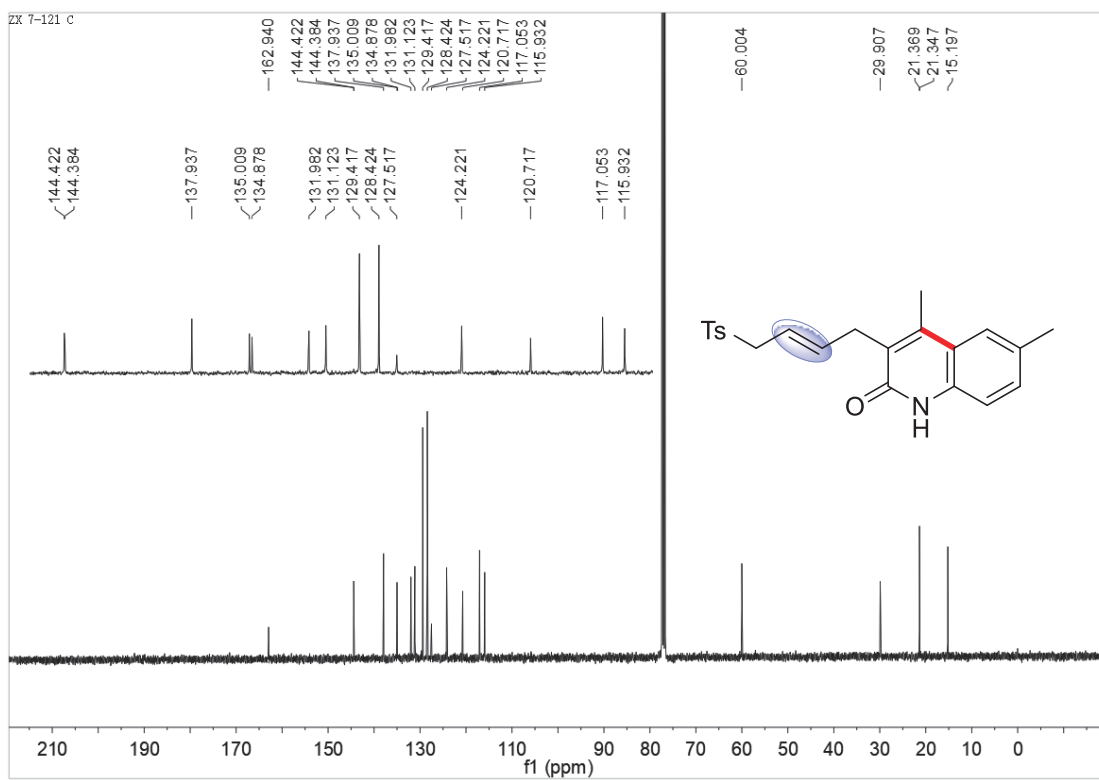

**5b**, DEPT 90 and DEPT 135

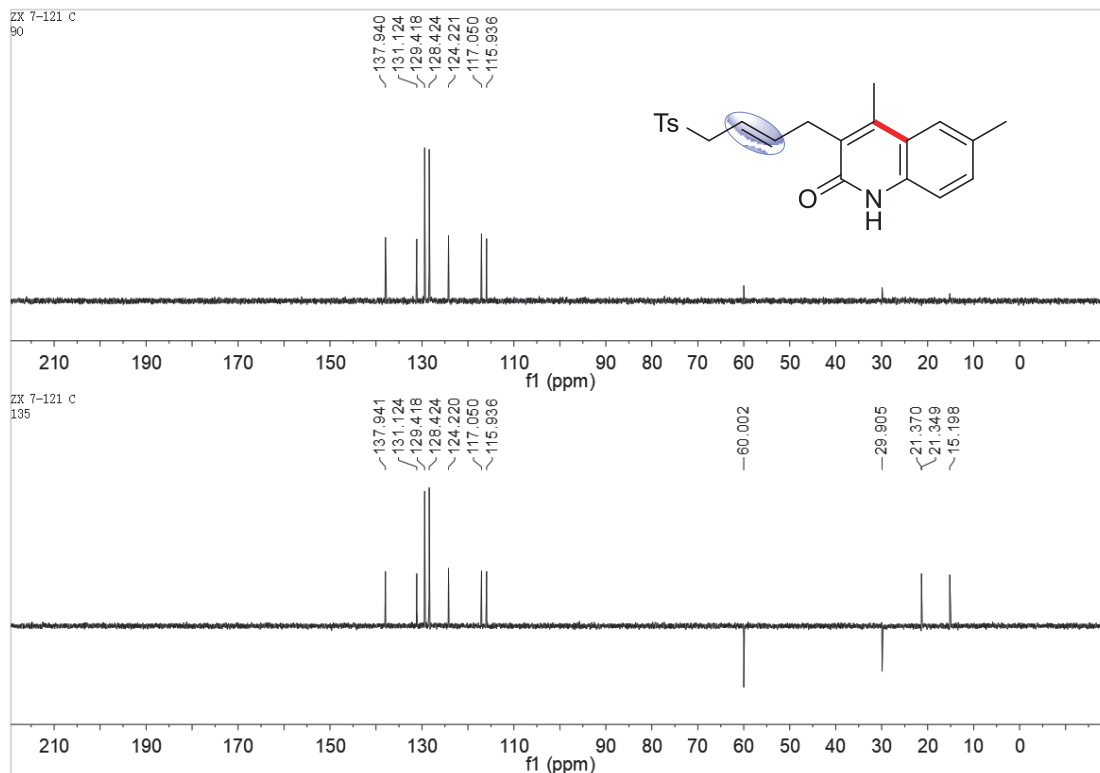

**6**, <sup>1</sup>H NMR

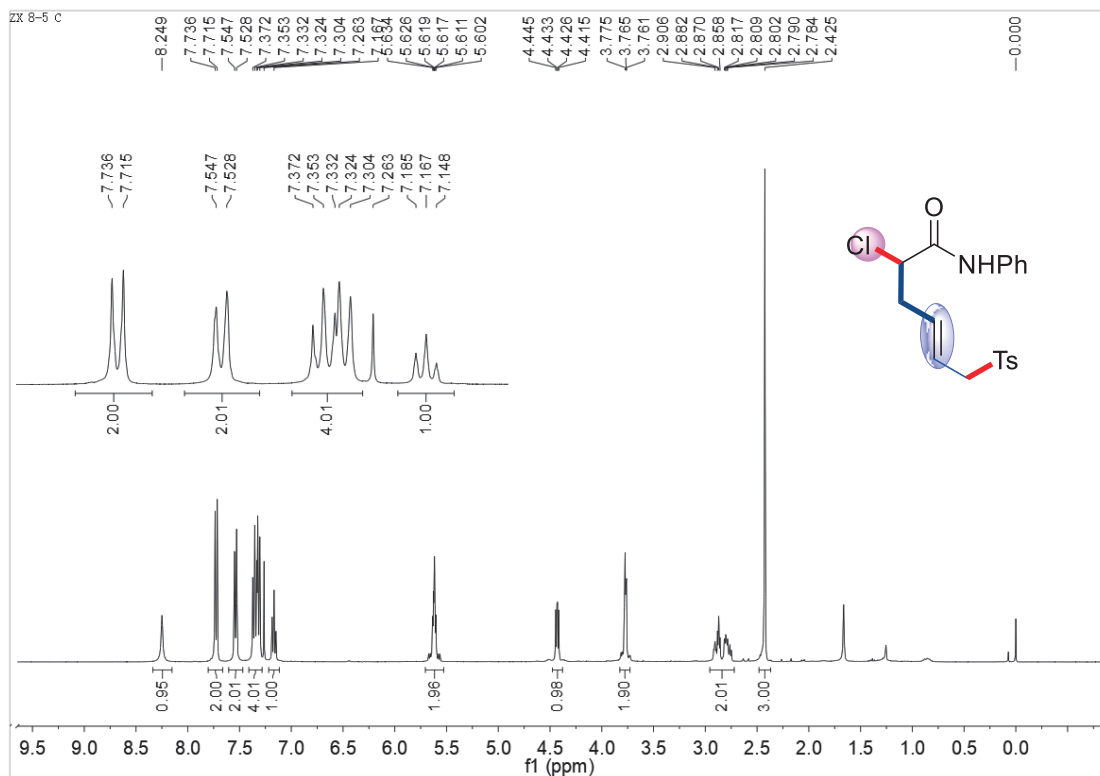

## 6, <sup>13</sup>C NMR

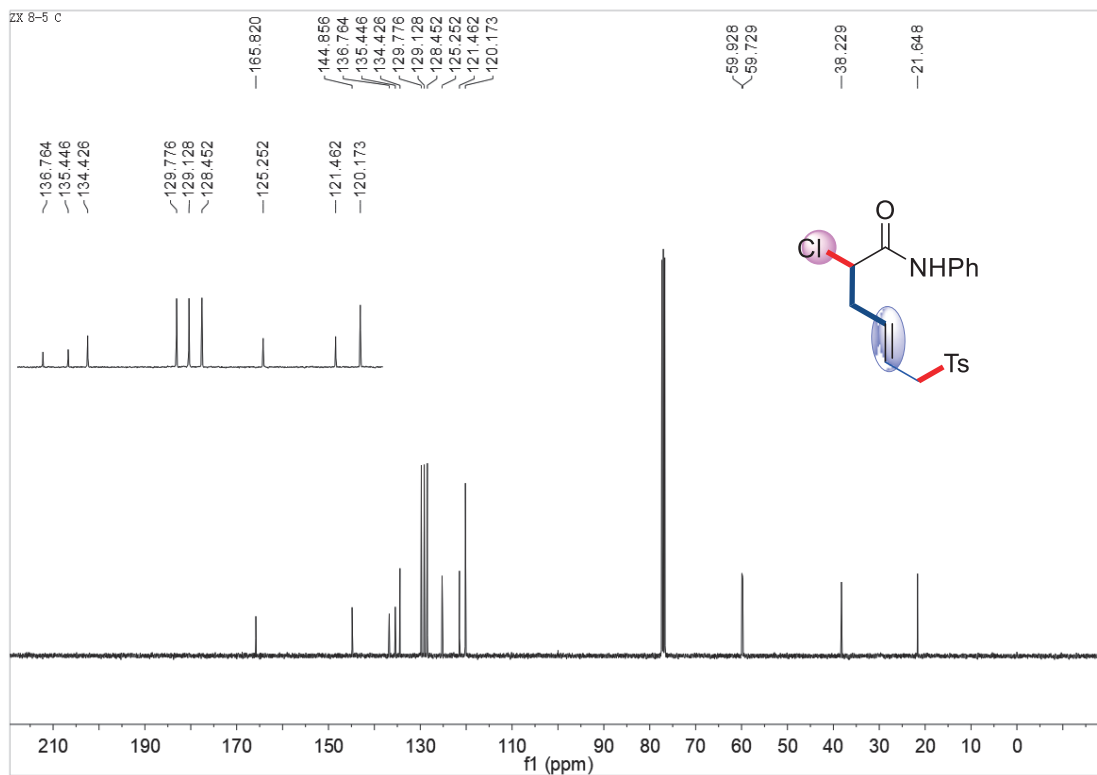

## 6, DEPT 90 and DEPT 135

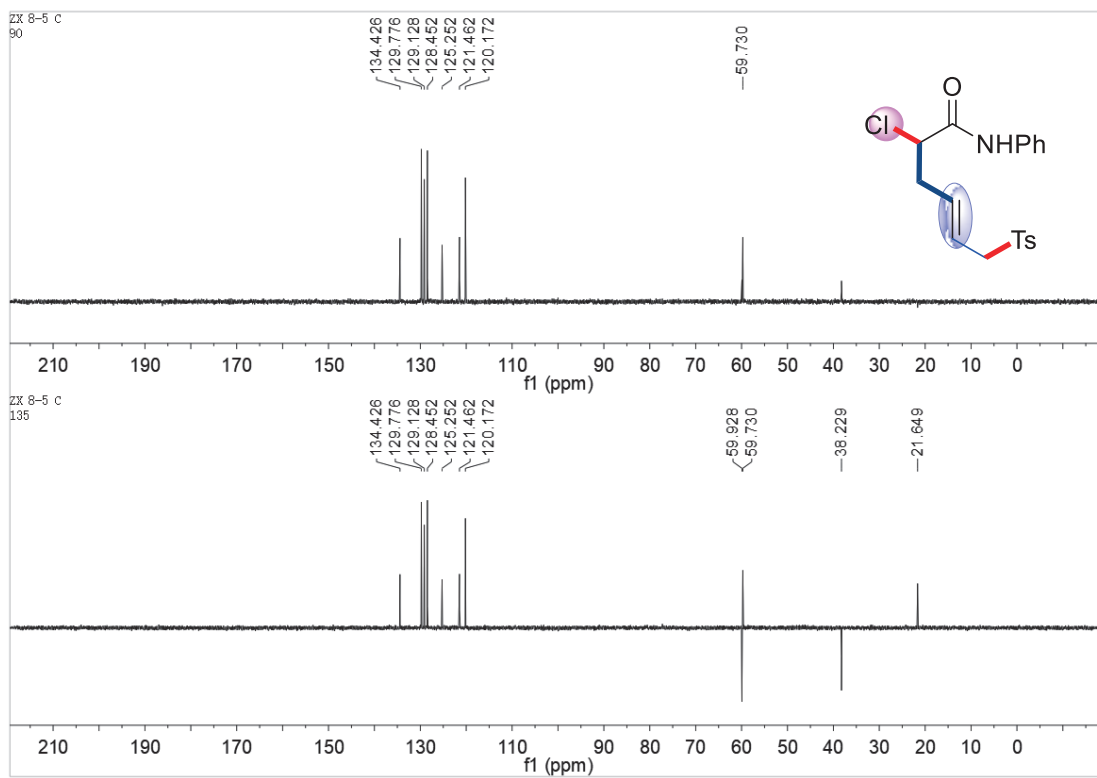

### 7, <sup>1</sup>H NMR

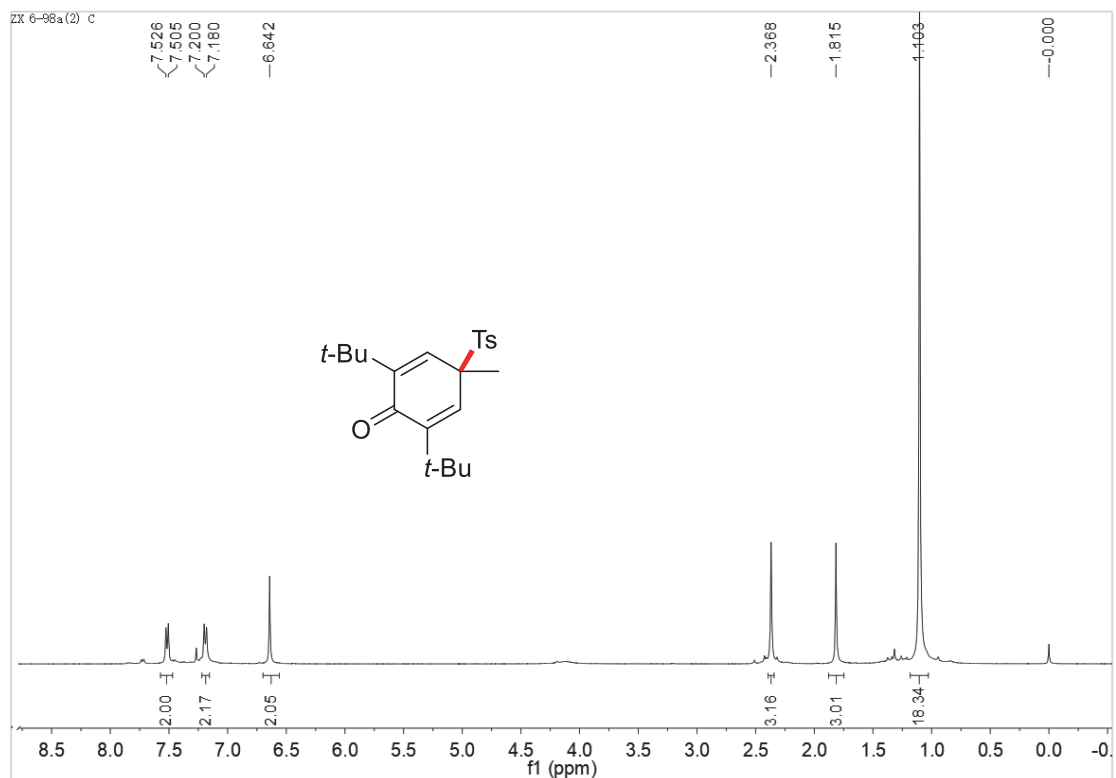

### 7, <sup>13</sup>C NMR

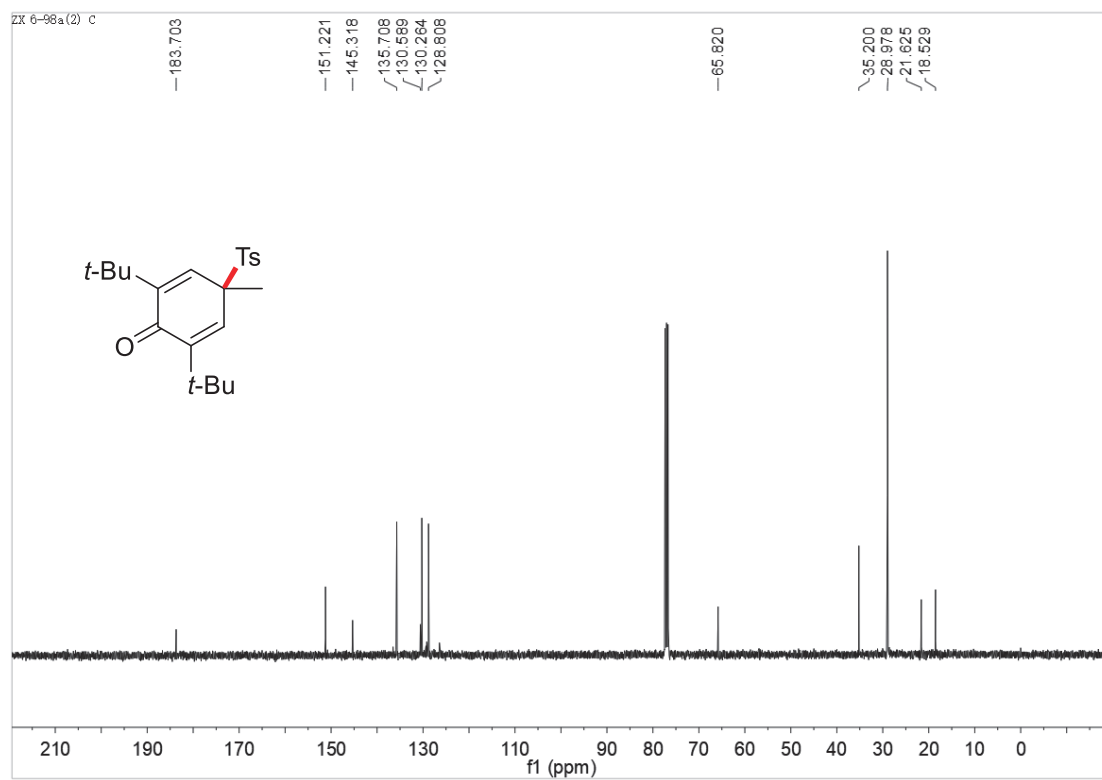

## 7, DEPT 90 and DEPT 135

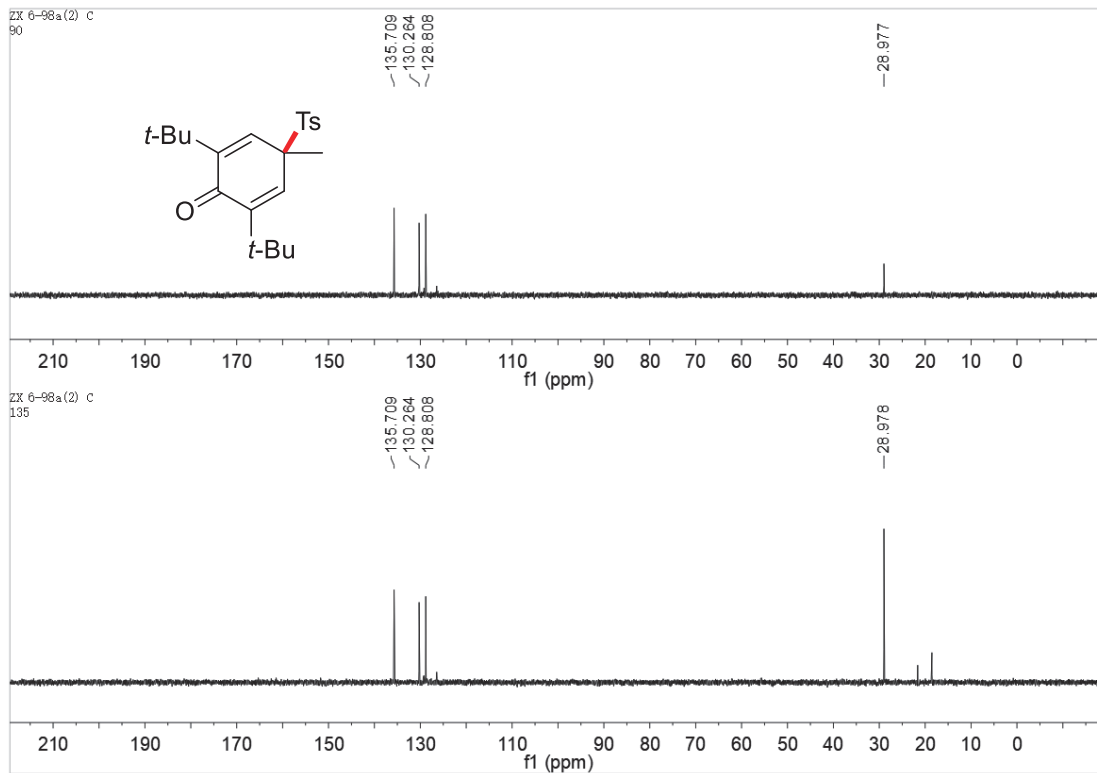

## 8, <sup>1</sup>H NMR

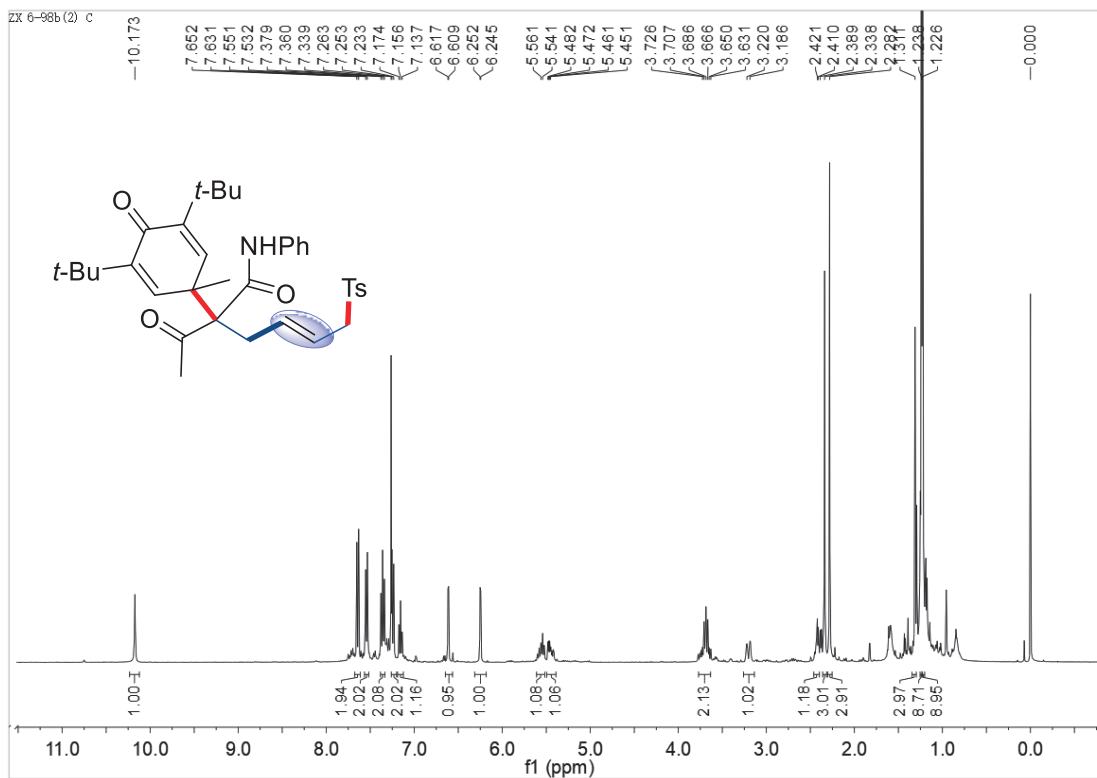

### 8, <sup>13</sup>C NMR

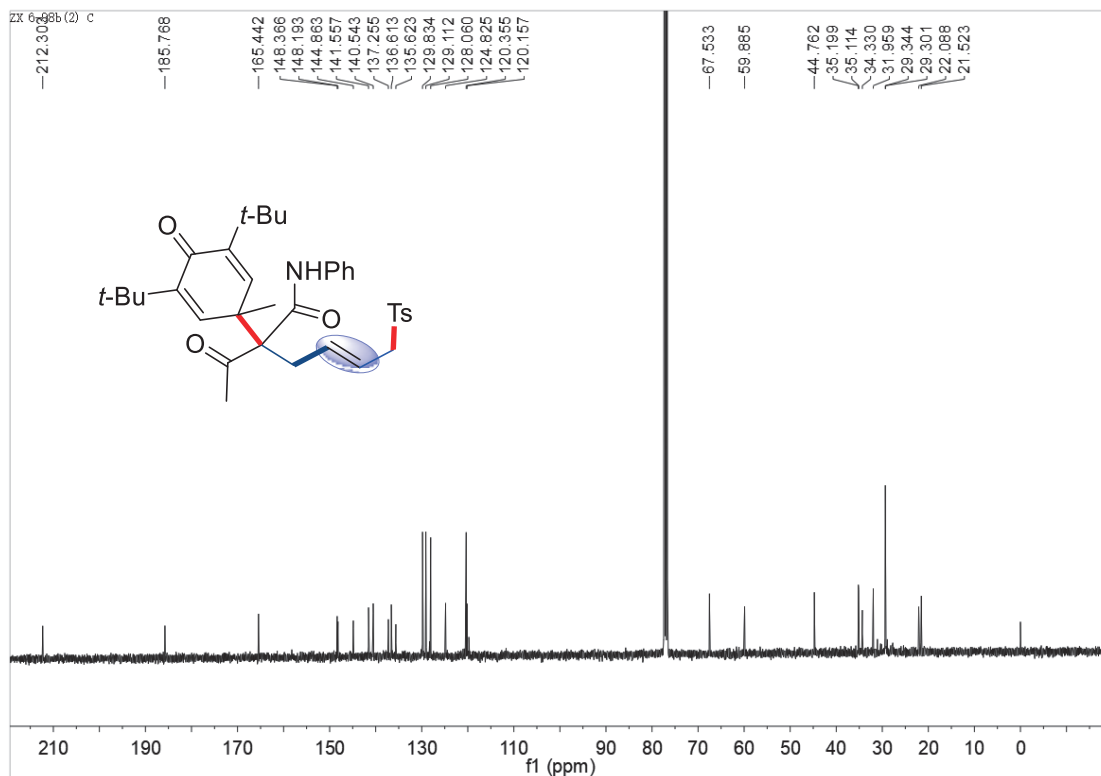

### 8, DEPT 90 and DEPT 135

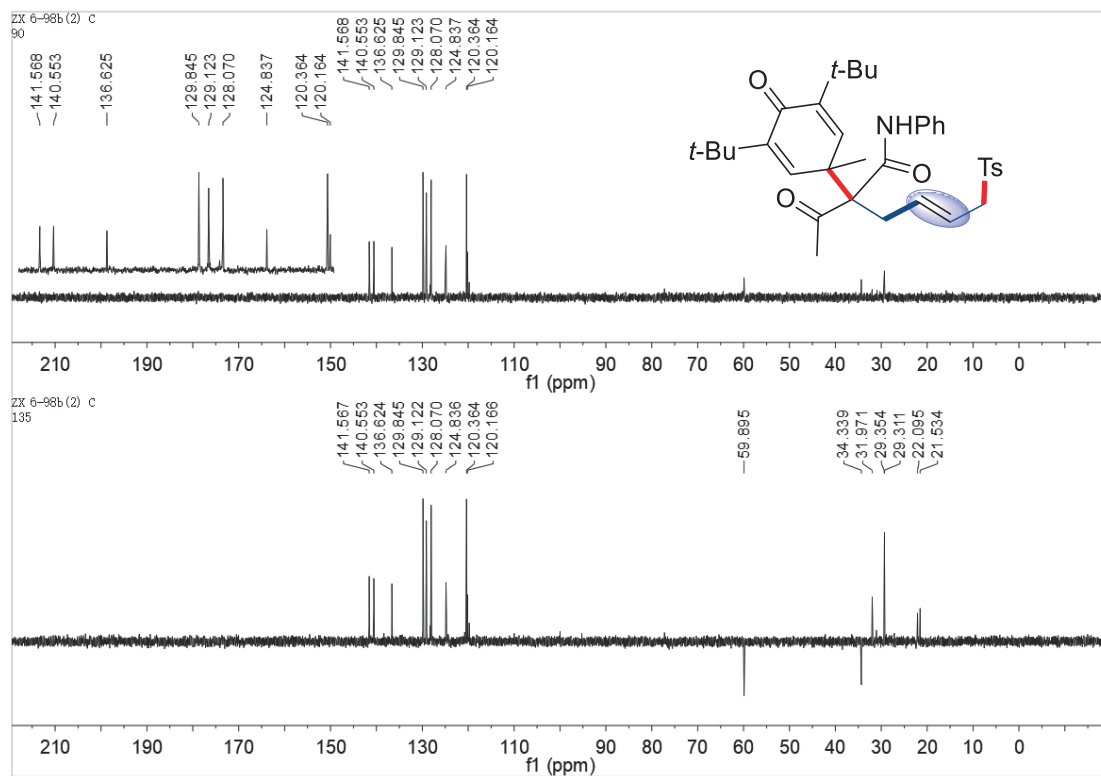



### 9, <sup>1</sup>H NMR

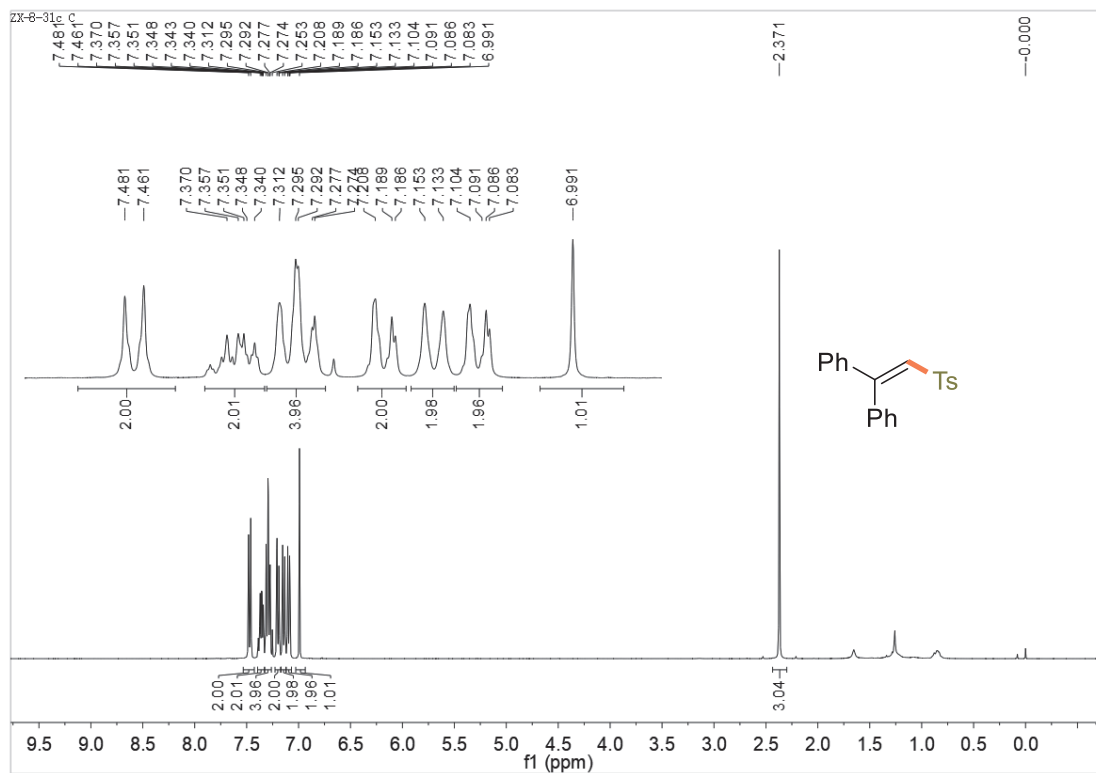

### 9, <sup>13</sup>C NMR

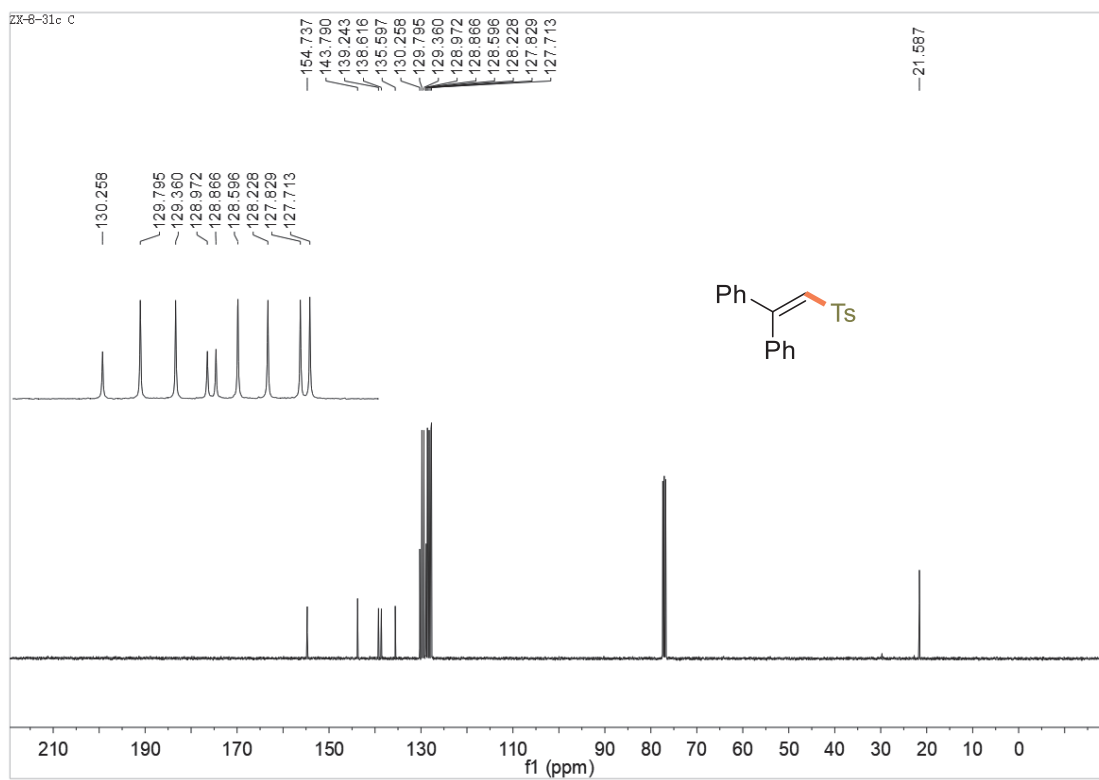

### 9, DEPT 90 and DEPT 135

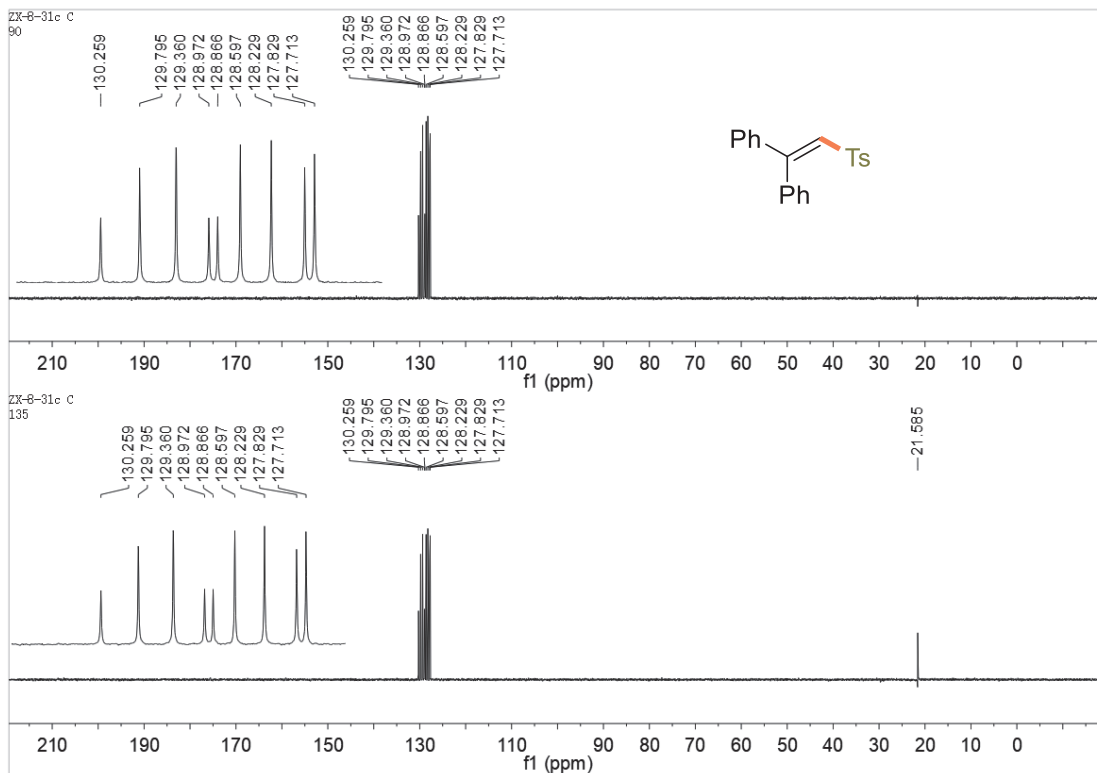

### 10, <sup>1</sup>H NMR

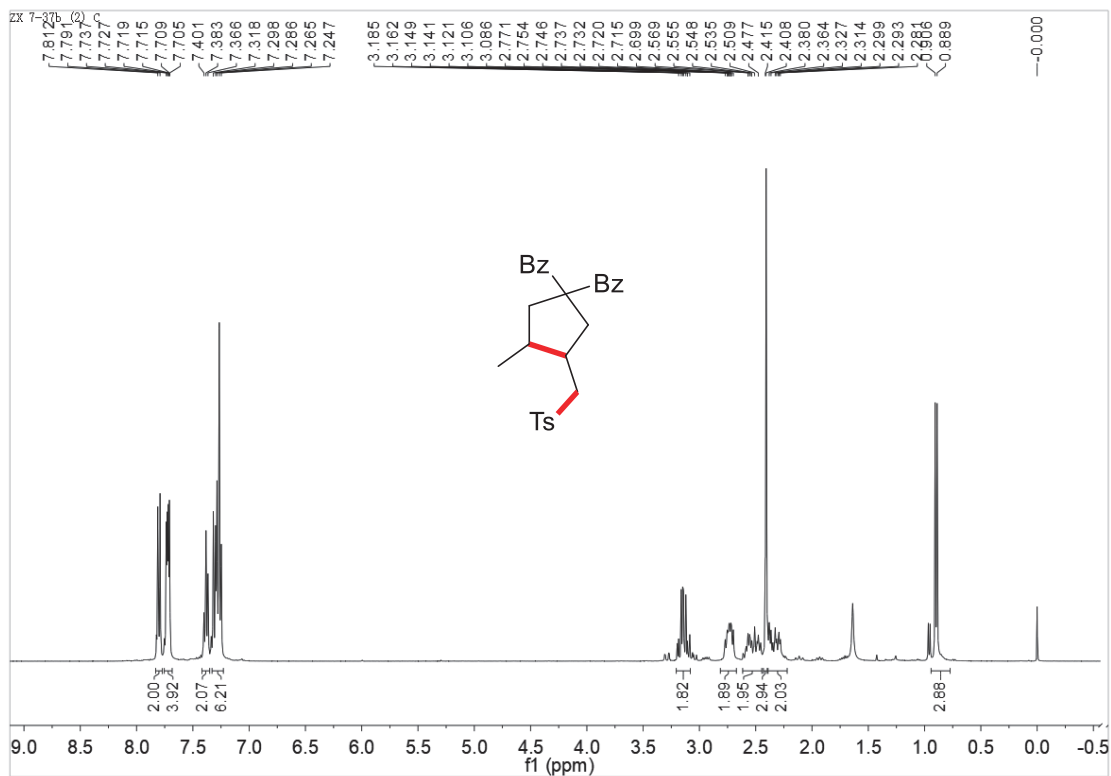

# 10, <sup>13</sup>C NMR

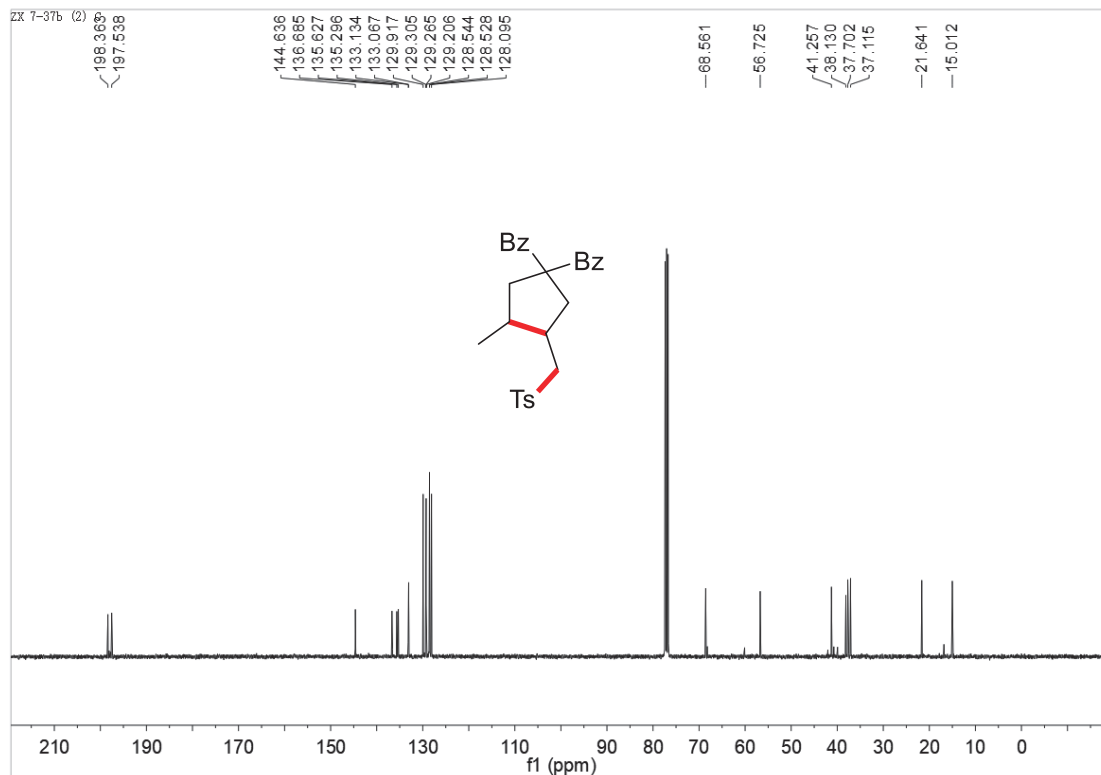

# 10, DEPT 90 and DEPT 135

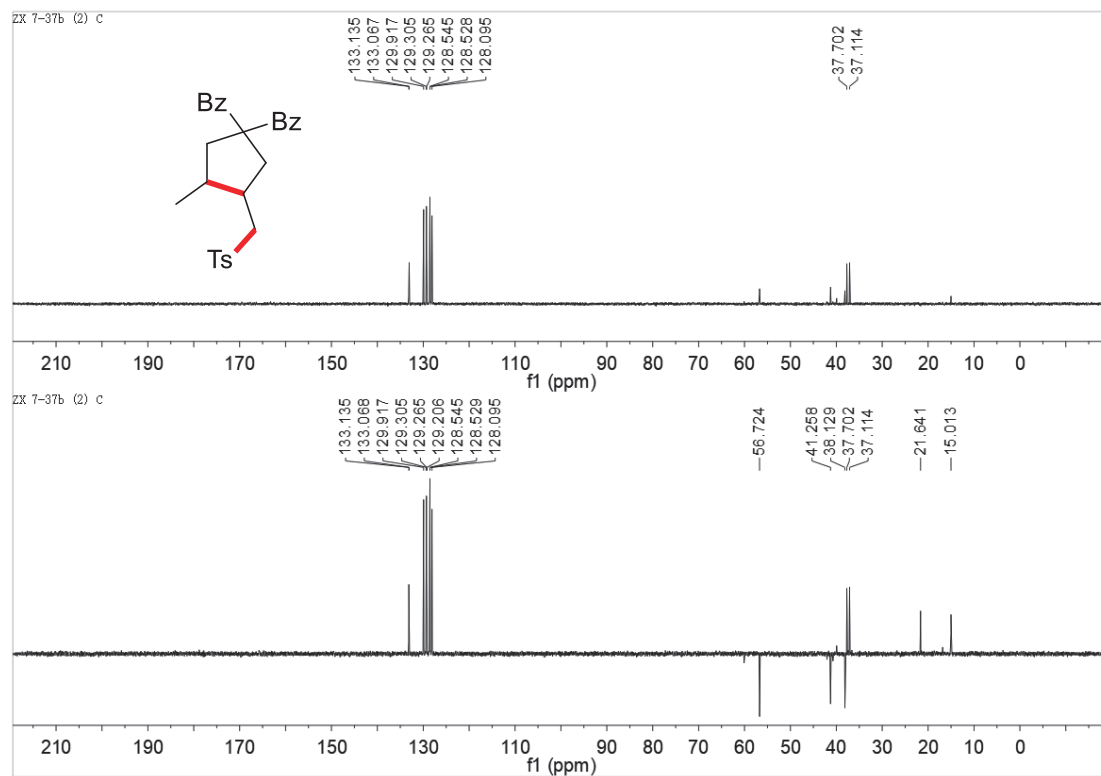

### 1a1, <sup>1</sup>H NMR

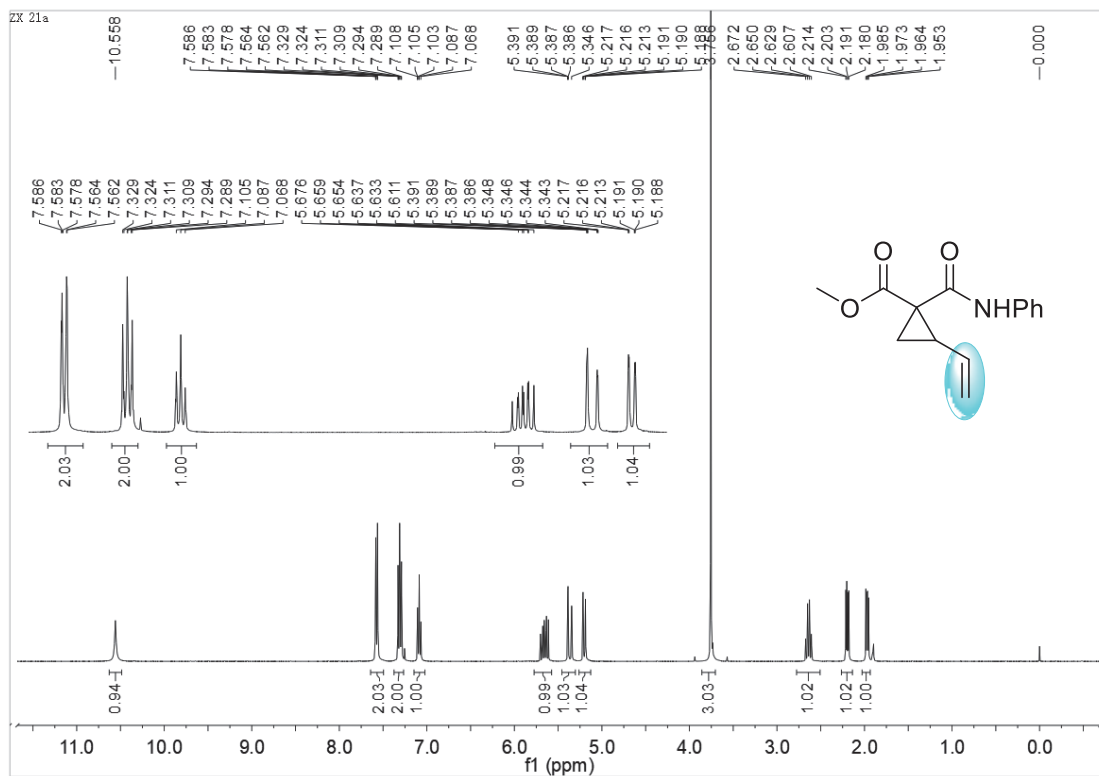

### 1a1, <sup>13</sup>C NMR

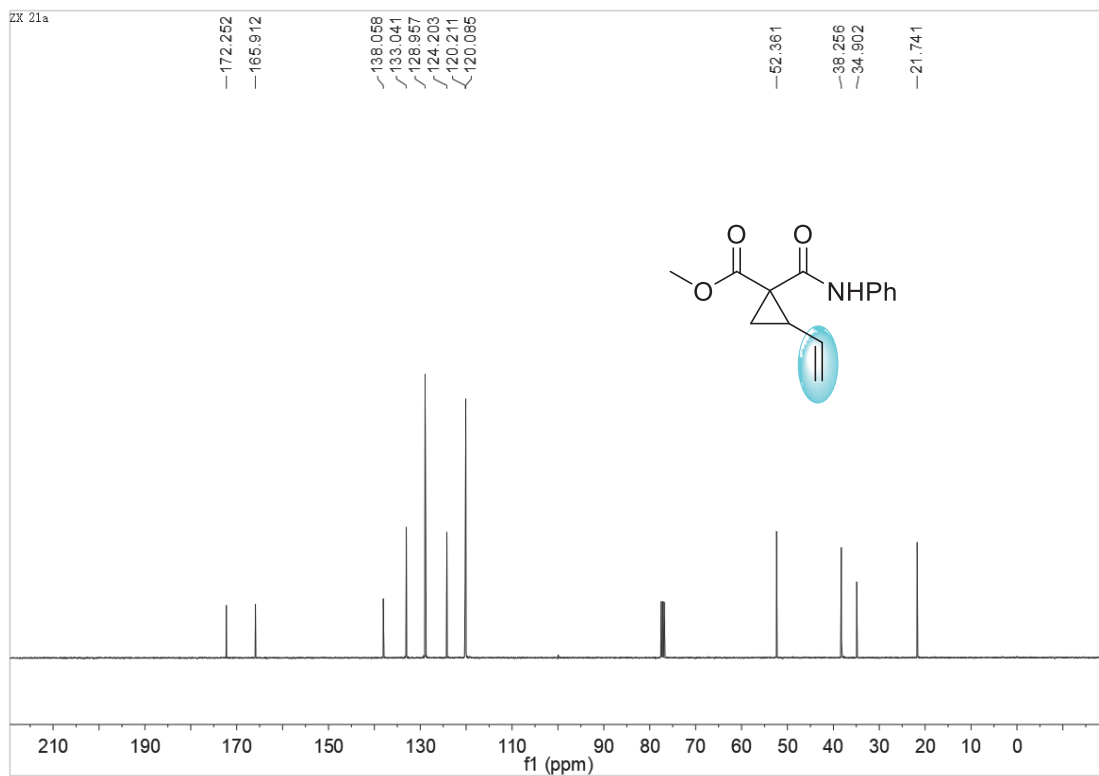

**1a1, DEPT 90 and DEPT 135**

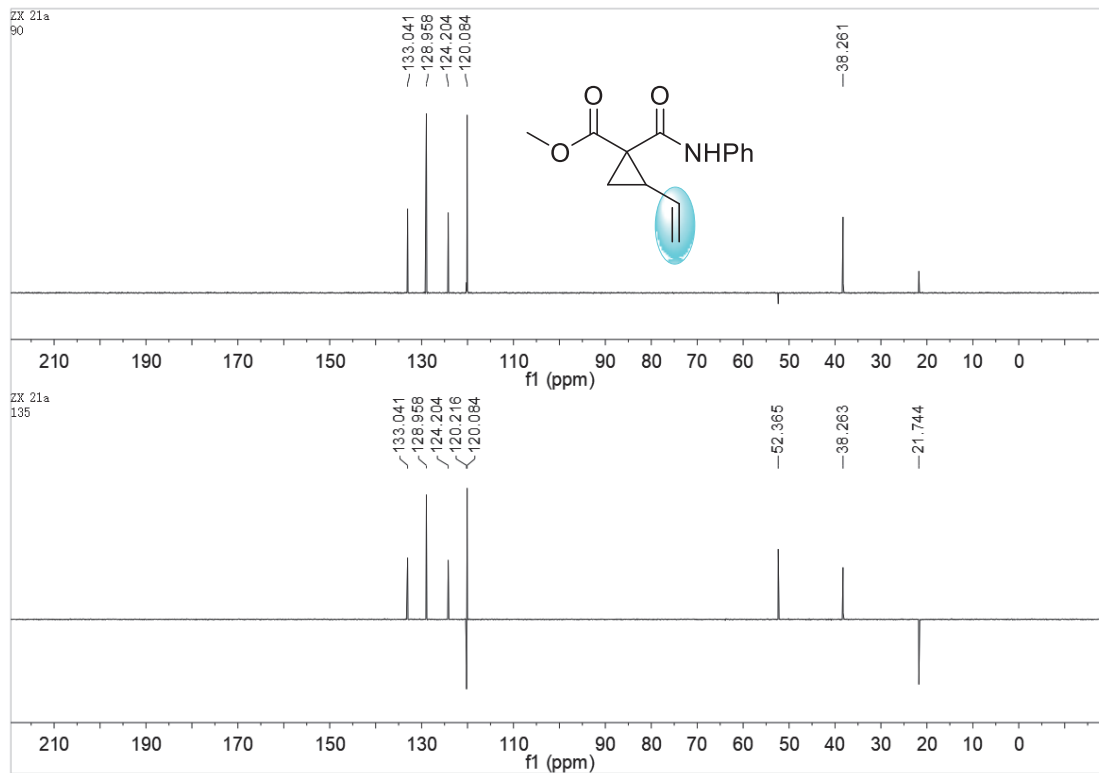

**1a3, <sup>1</sup>H NMR**

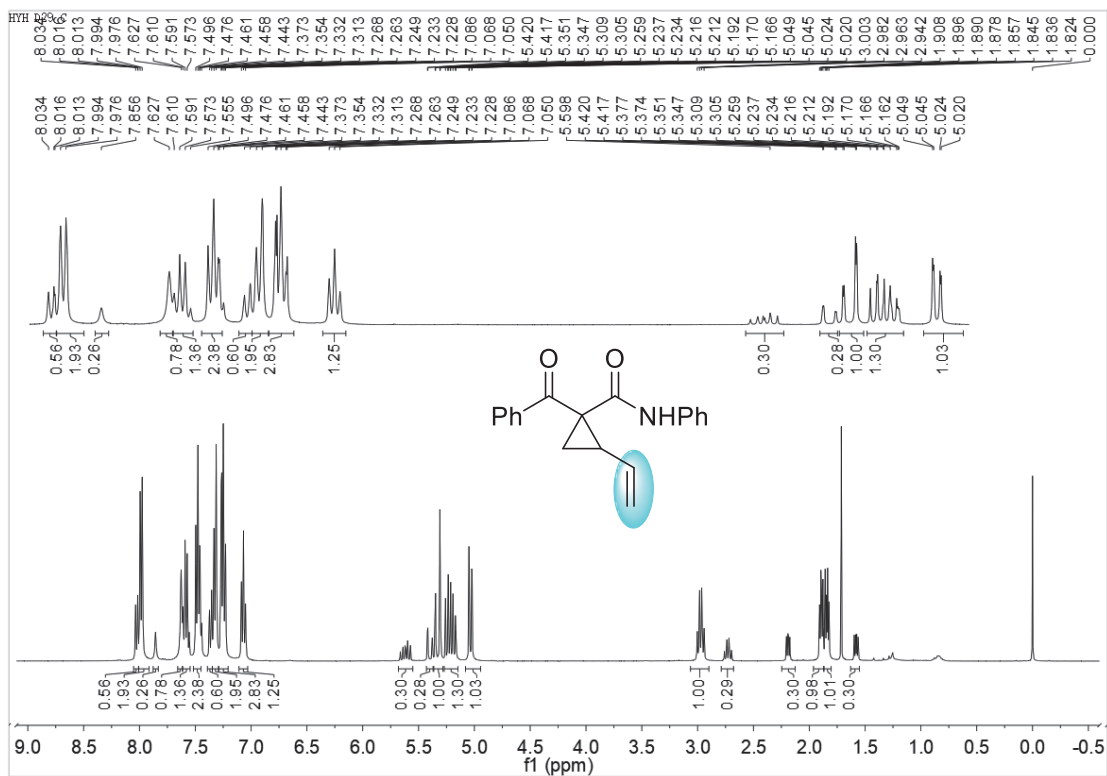

### 1a3, <sup>13</sup>C NMR

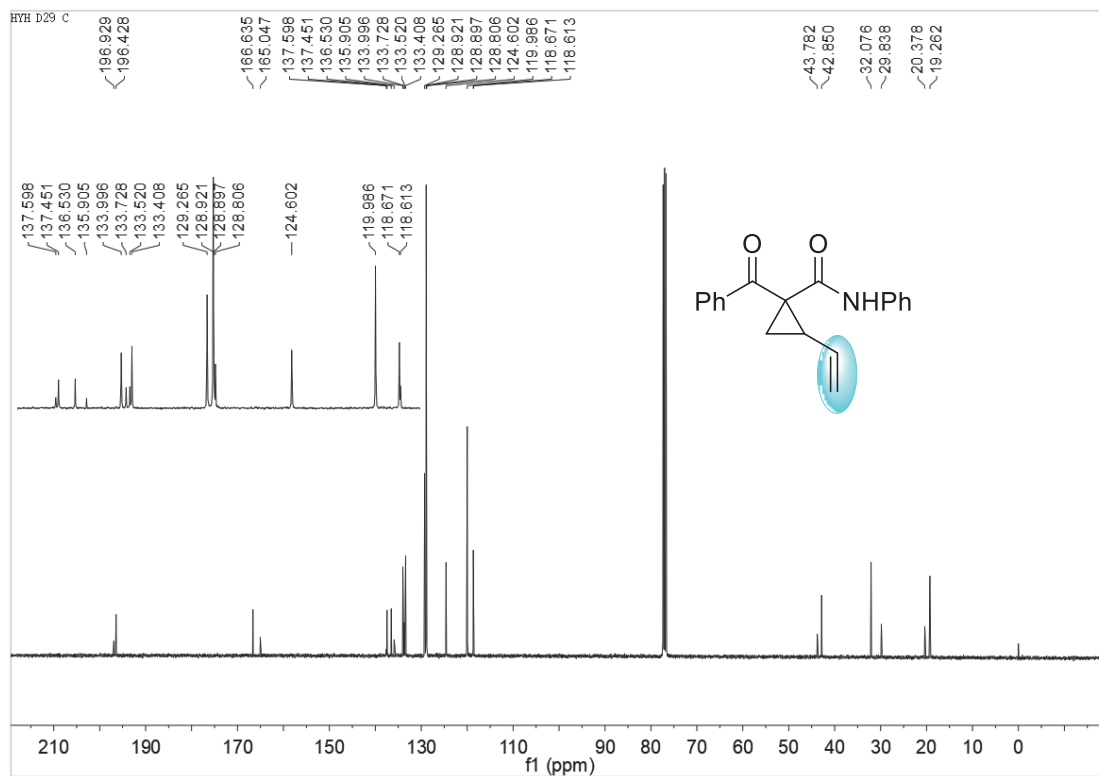

### 1a3, DEPT 90 and DEPT 135

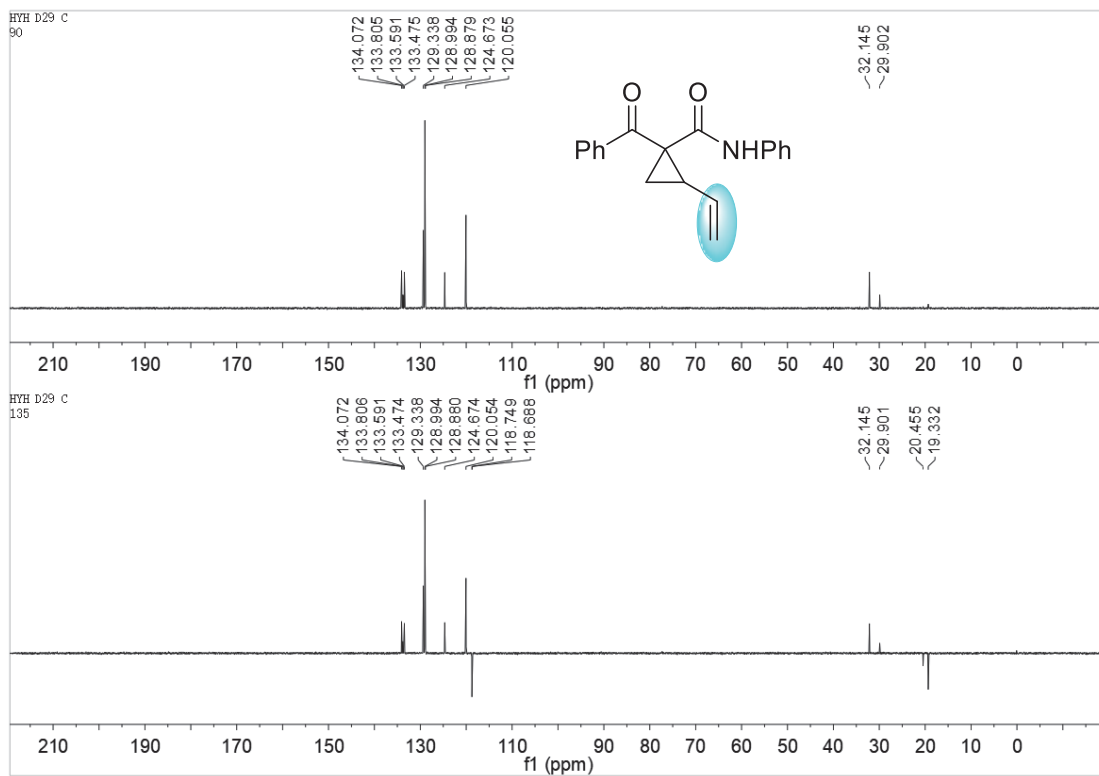

### 1b5, <sup>1</sup>H NMR

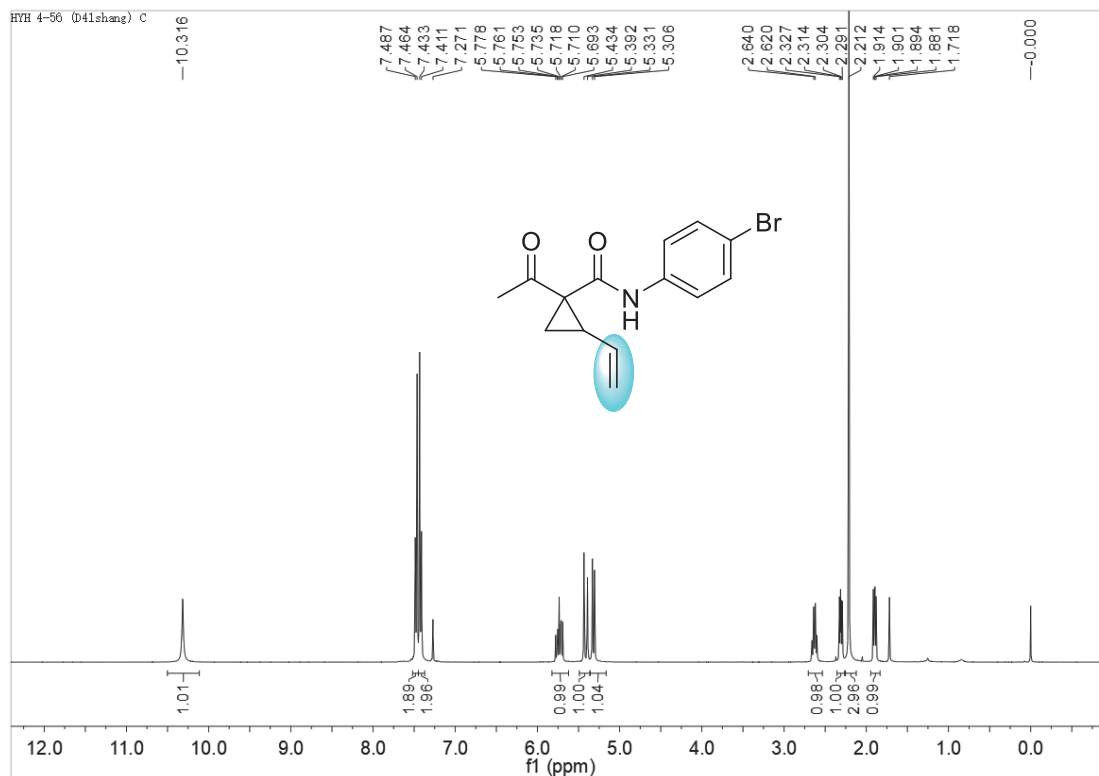

### 1b5, <sup>13</sup>C NMR

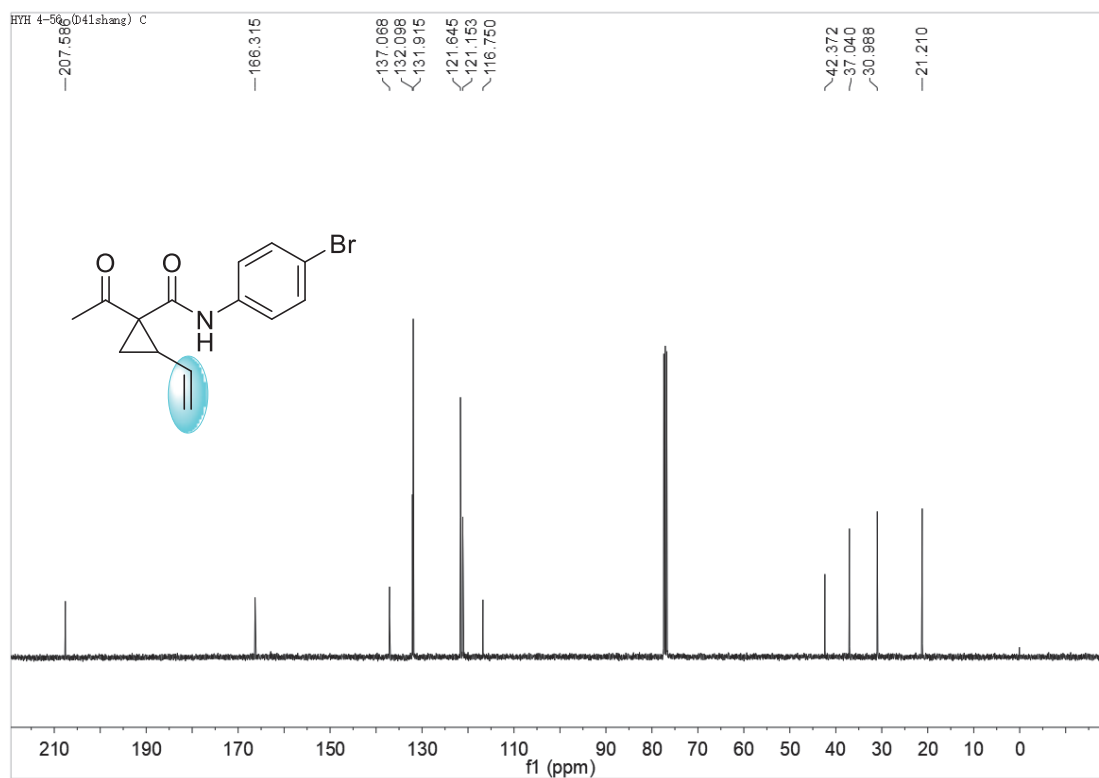

**1b5**, DEPT 90 and DEPT 135

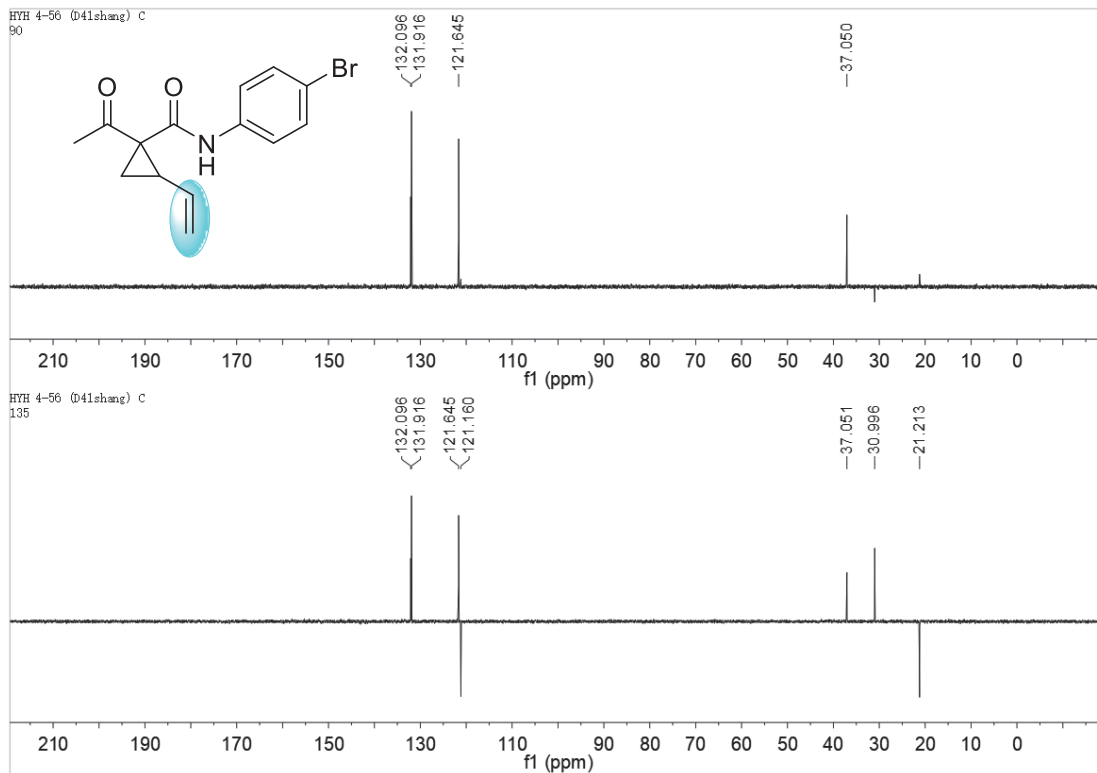

**1b6**, <sup>1</sup>H NMR

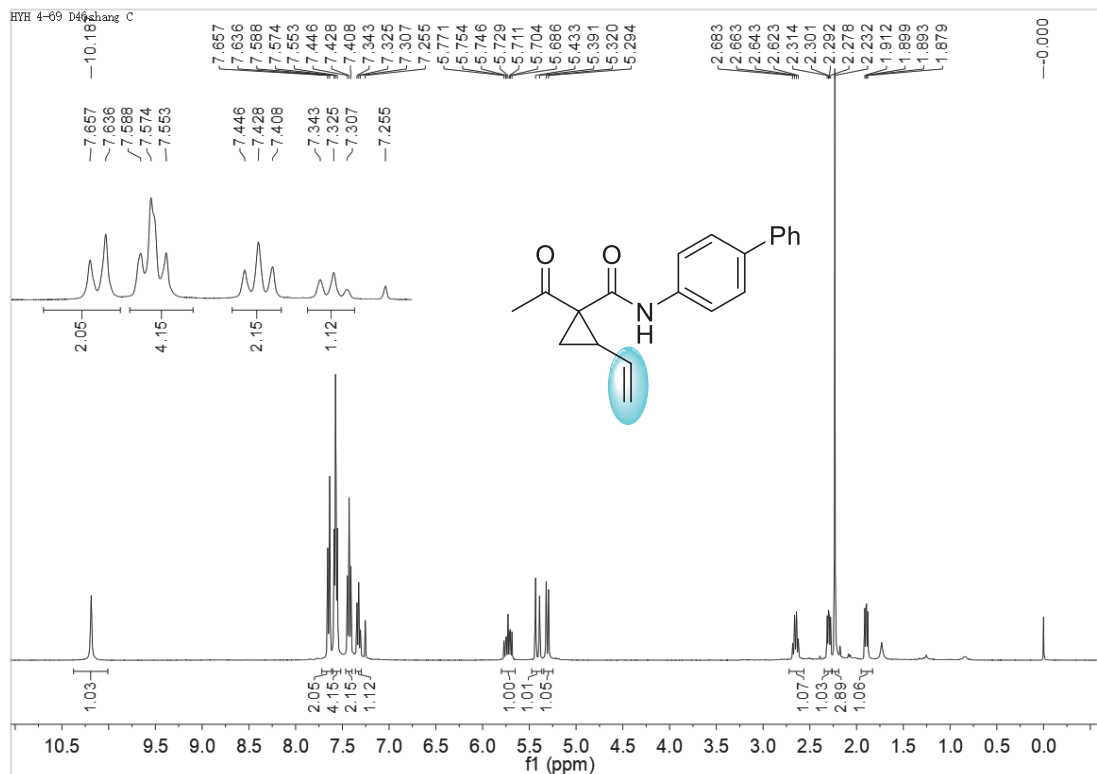



### 1b6, <sup>13</sup>C NMR

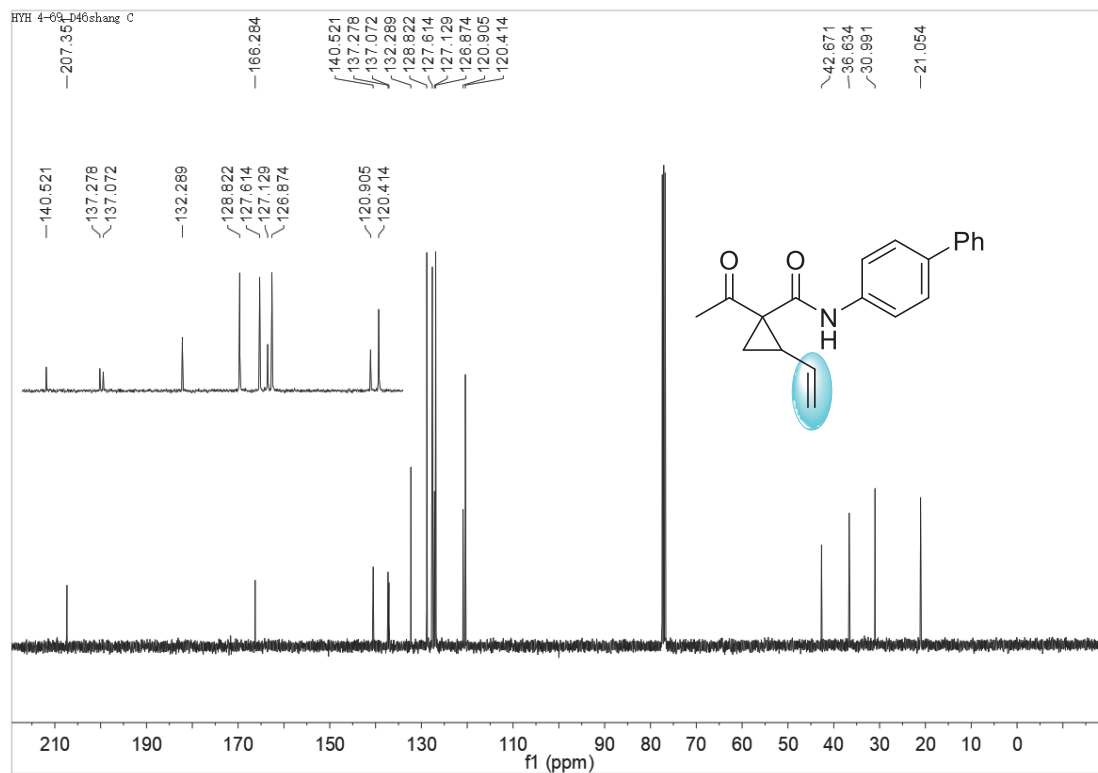

### 1b6, DEPT 90 and DEPT 135

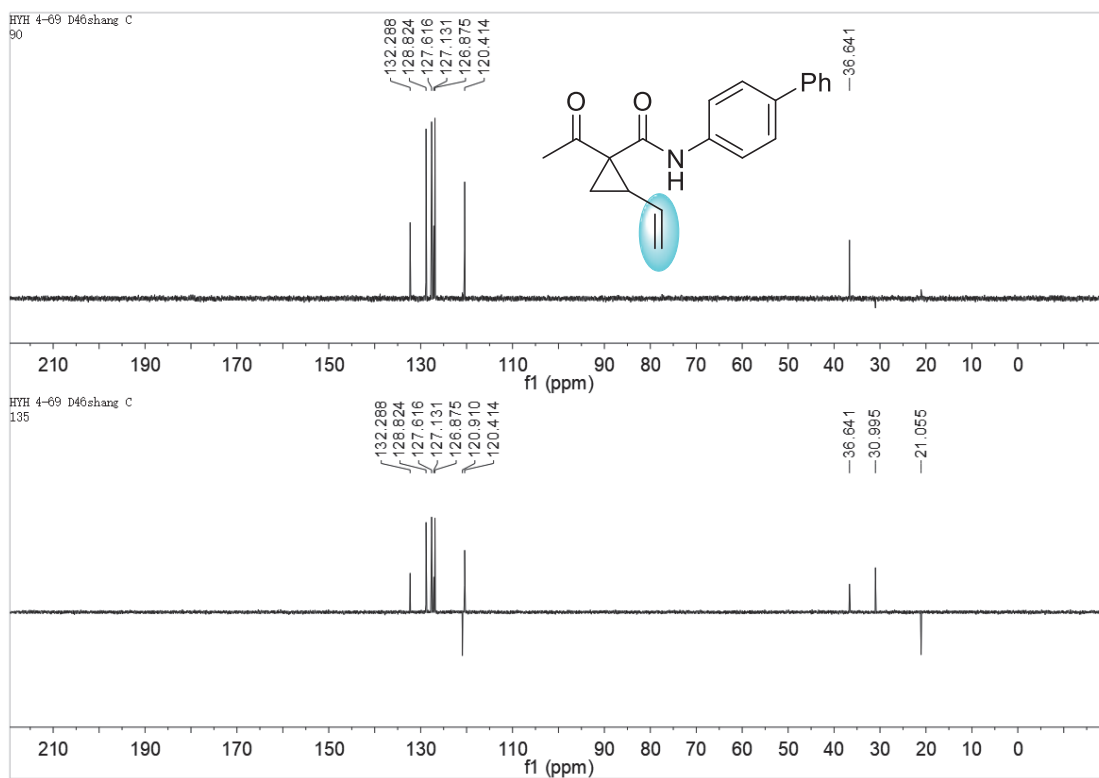

### 1b7, <sup>1</sup>H NMR

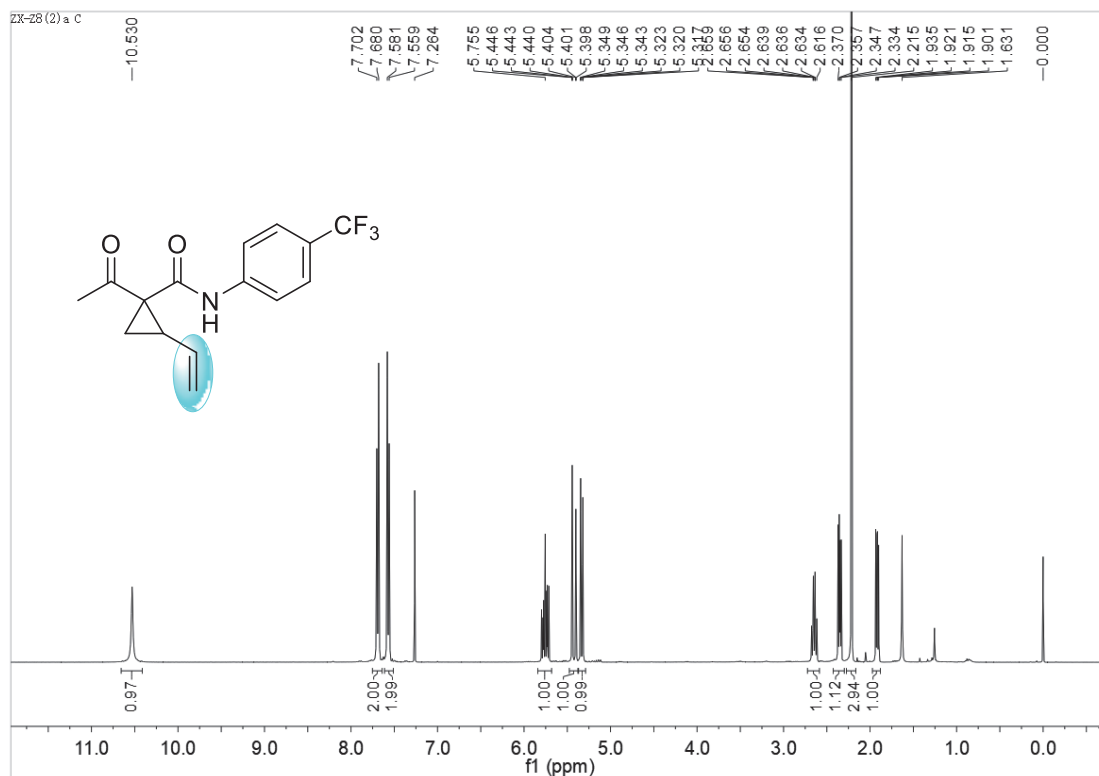

### 1b7, <sup>13</sup>C NMR

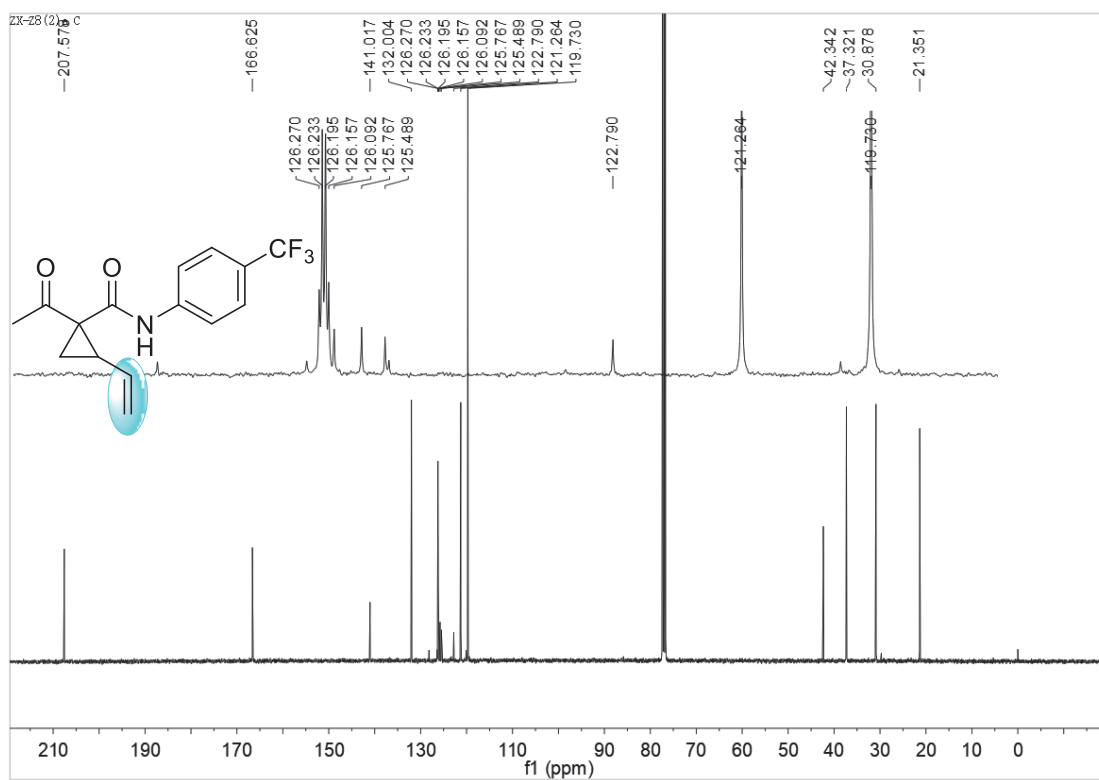

**1b7**, DEPT 90 and DEPT 135

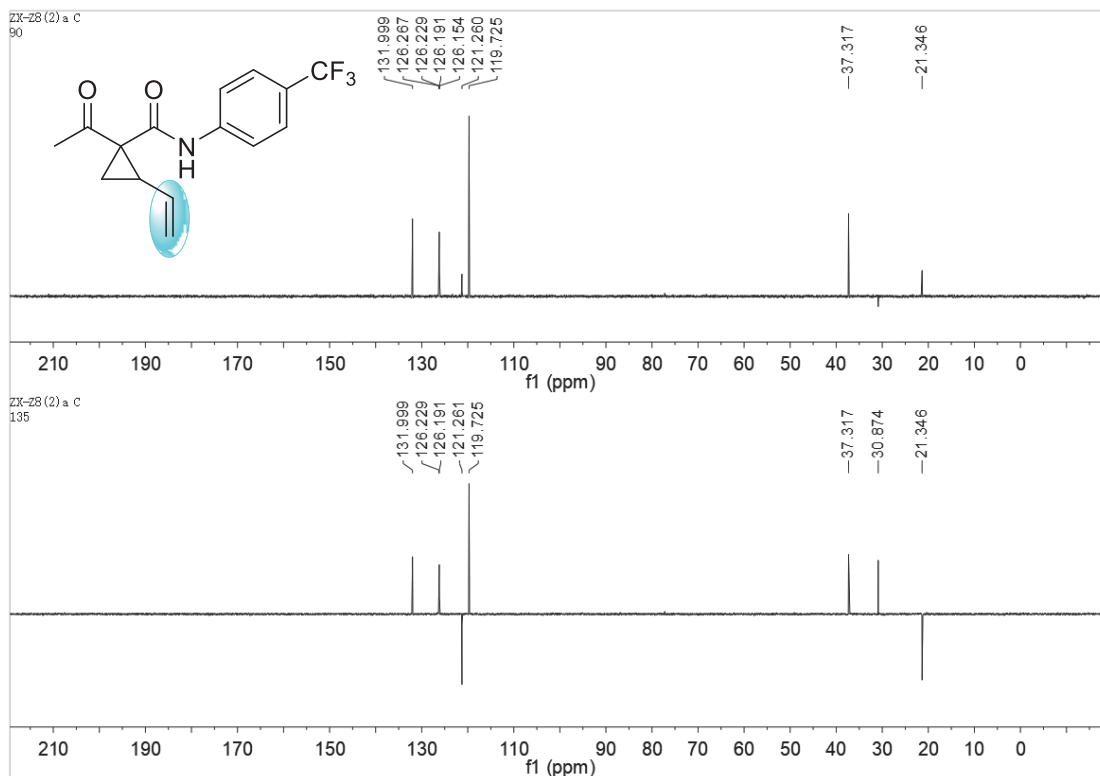

**1e**, <sup>1</sup>H NMR

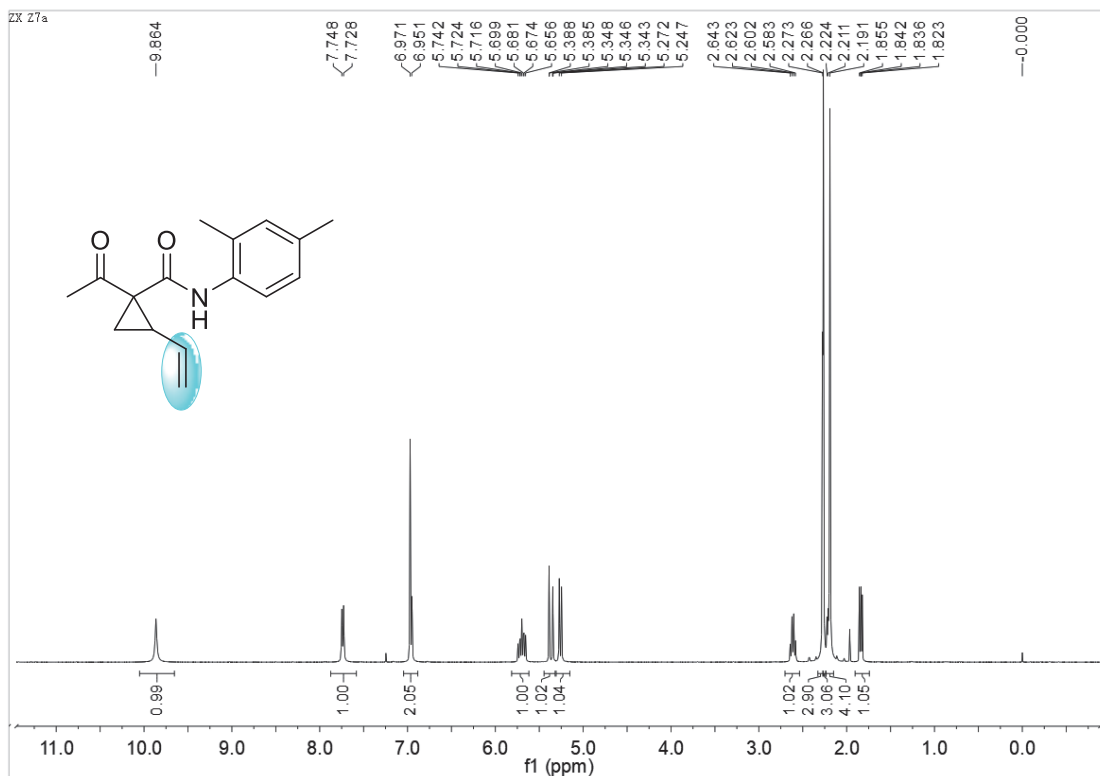

# 1e, <sup>13</sup>C NMR

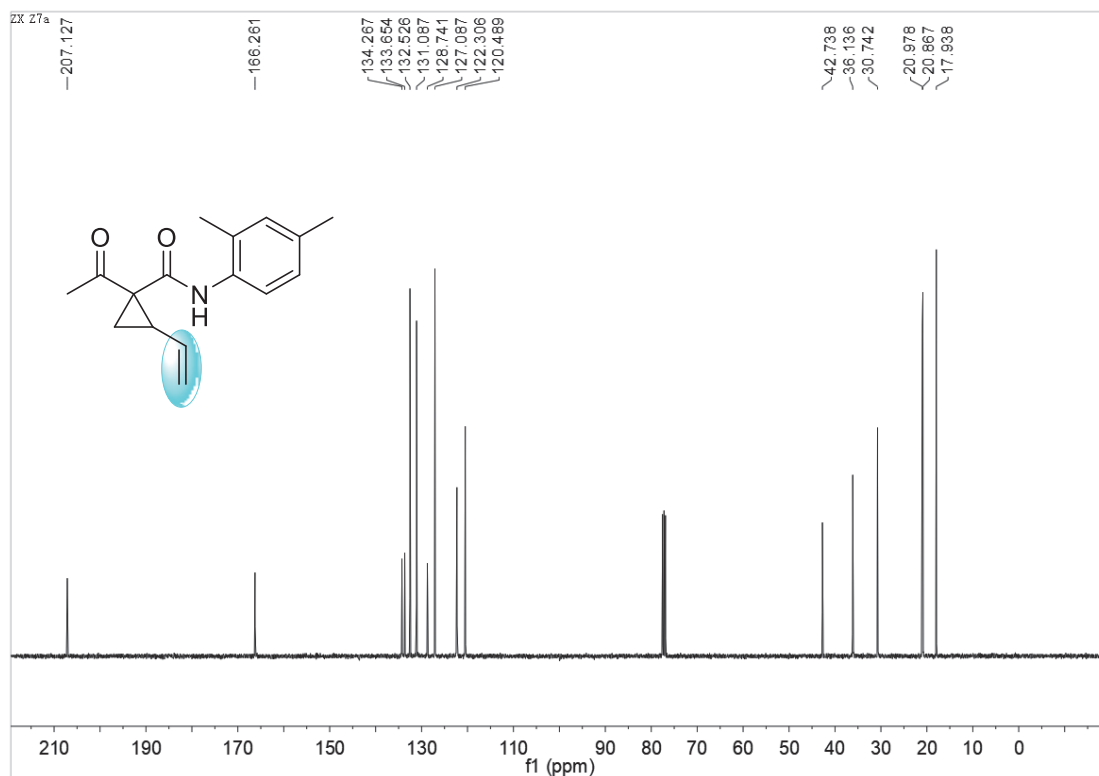

# 1e, DEPT 90 and DEPT 135

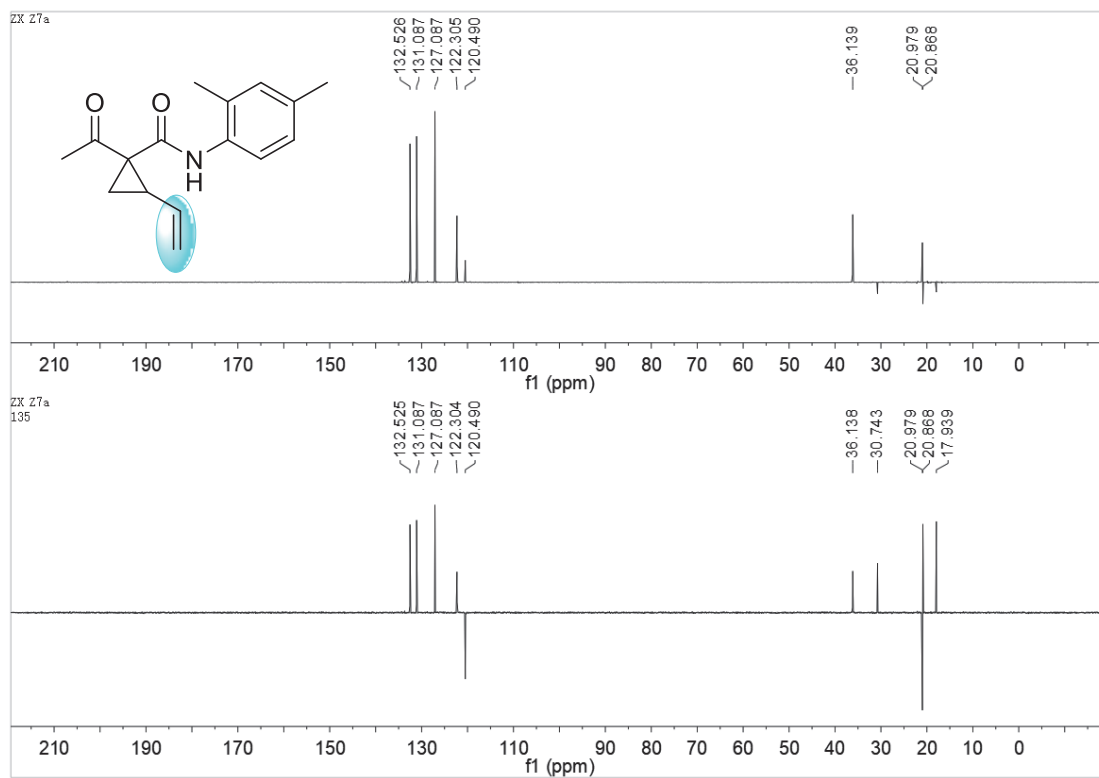

**1g, <sup>1</sup>H NMR**

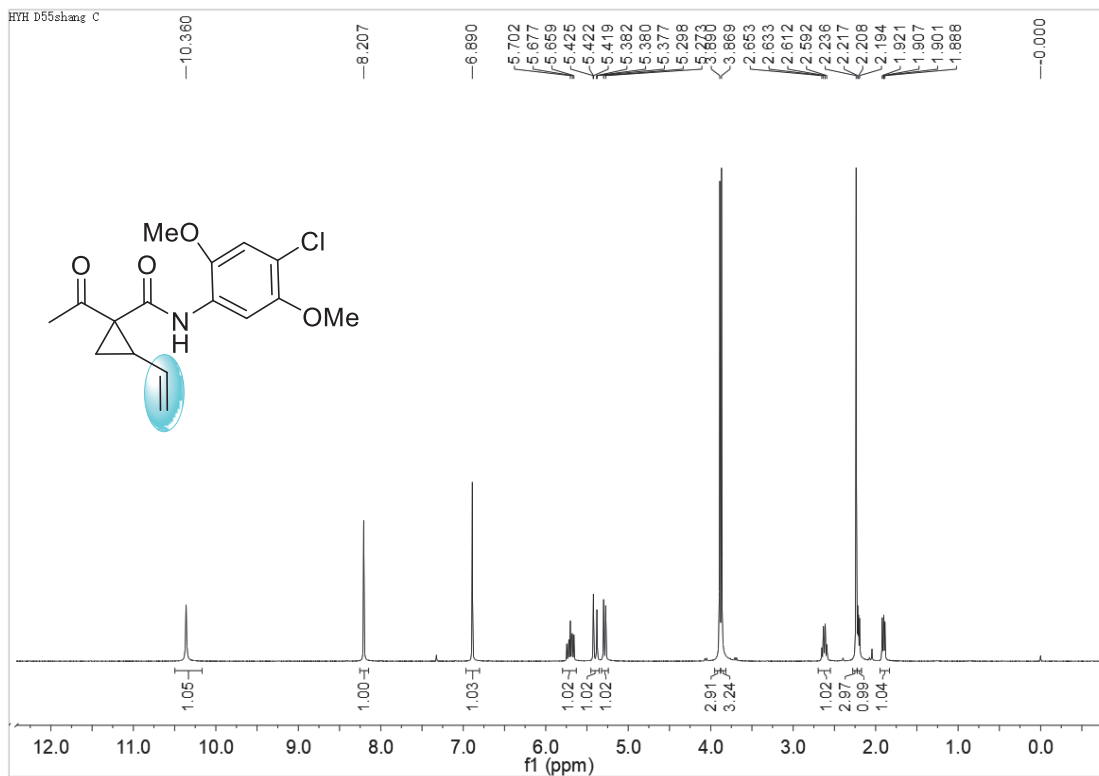

**1g, <sup>13</sup>C NMR**

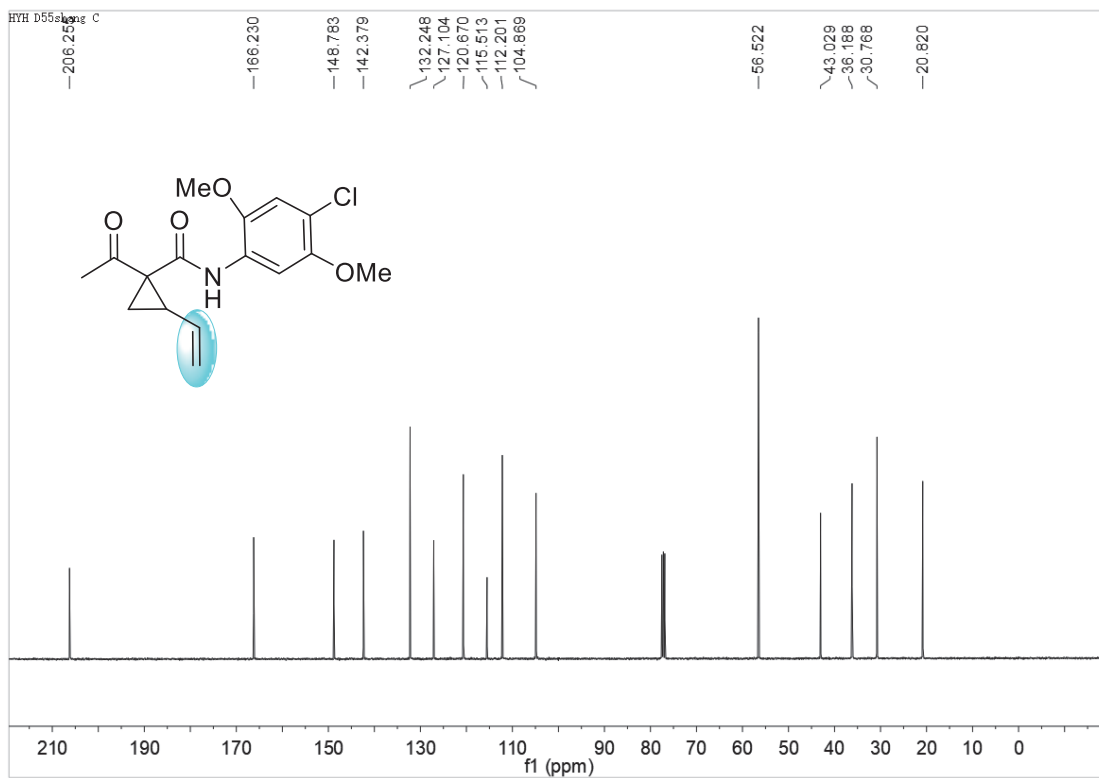

**1g**, DEPT 90 and DEPT 135

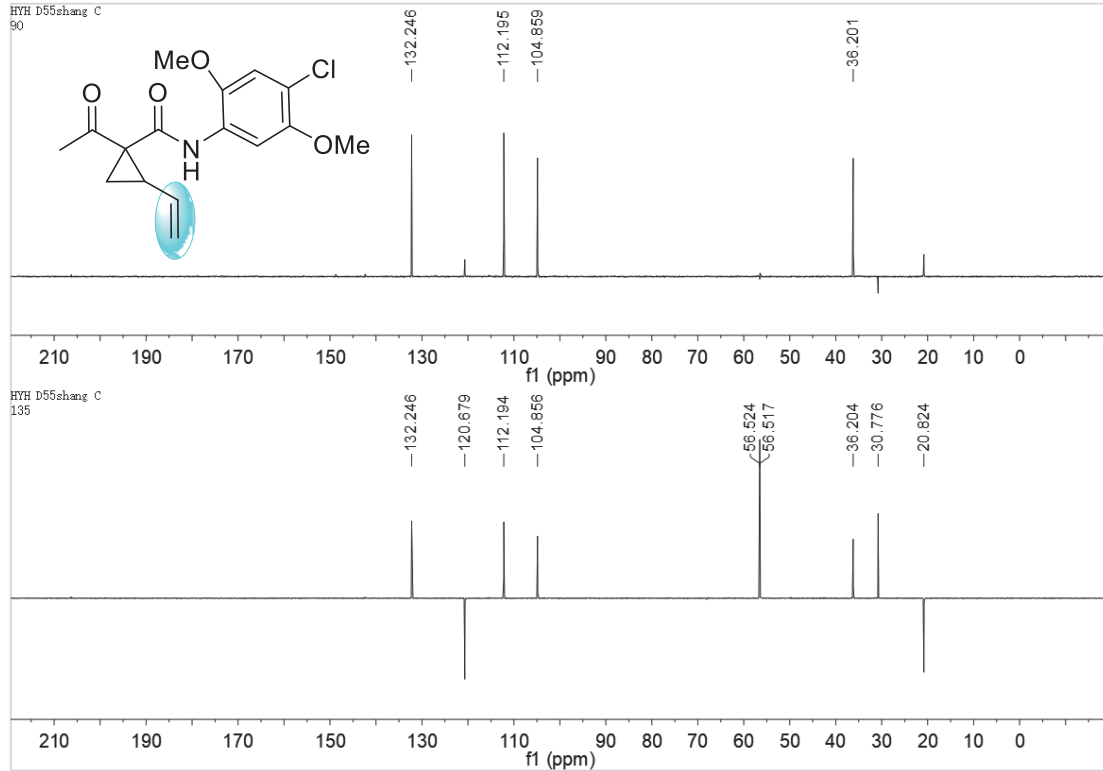

**1h**,  $^1\text{H}$  NMR

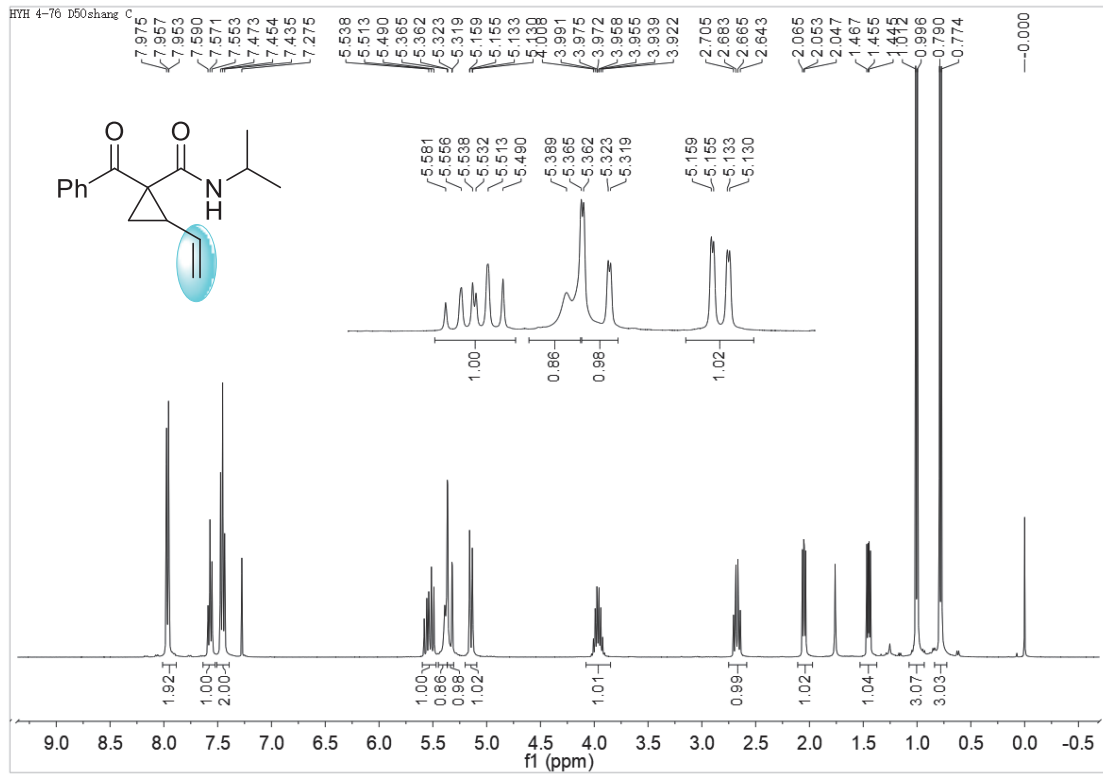

# 1h, <sup>13</sup>C NMR

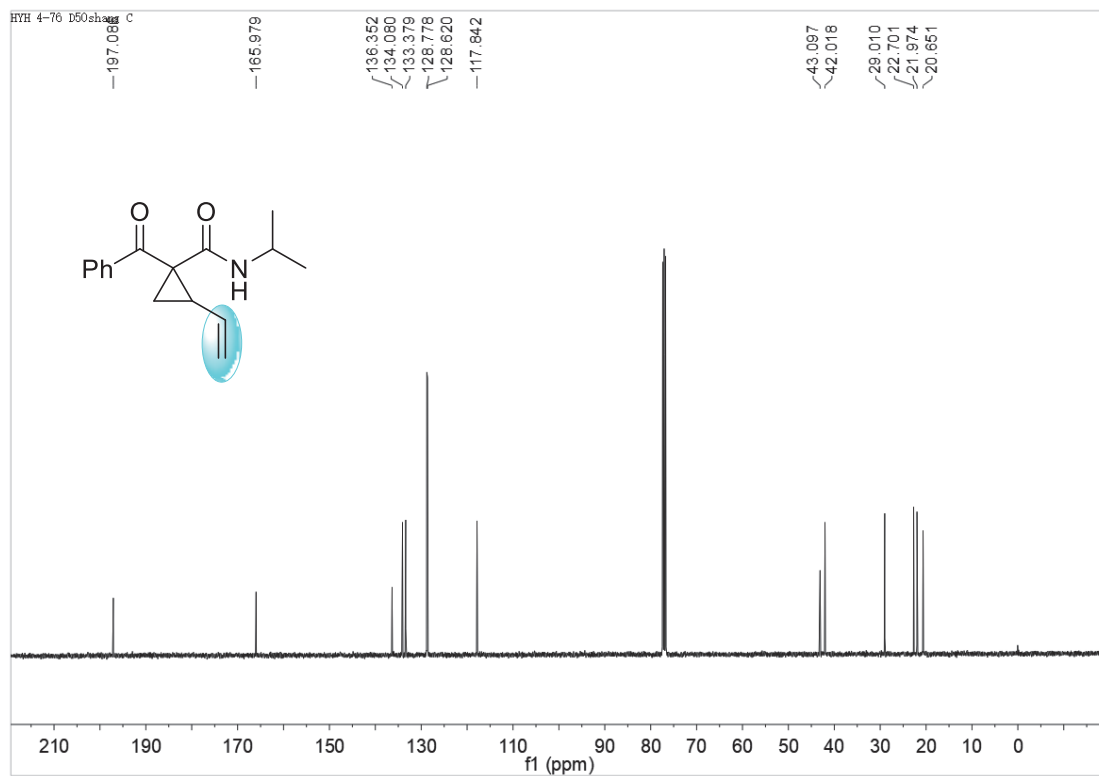

# 1h, DEPT 90 and DEPT 135

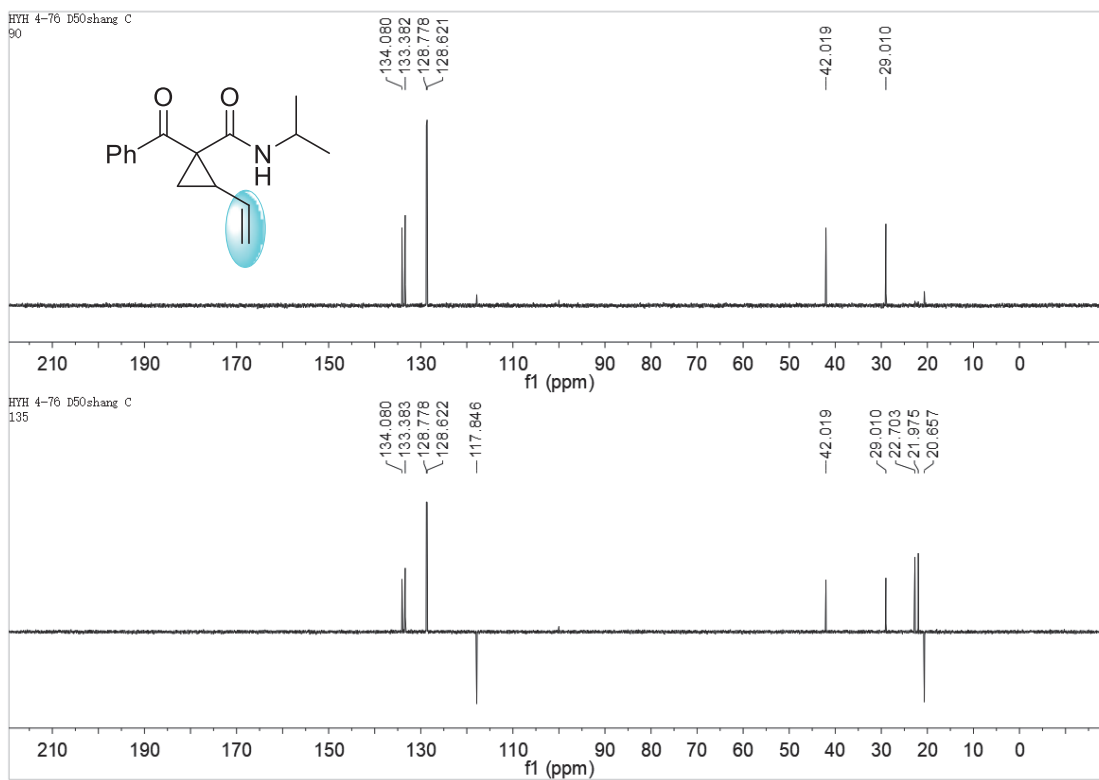

### 1'a5, <sup>1</sup>H NMR

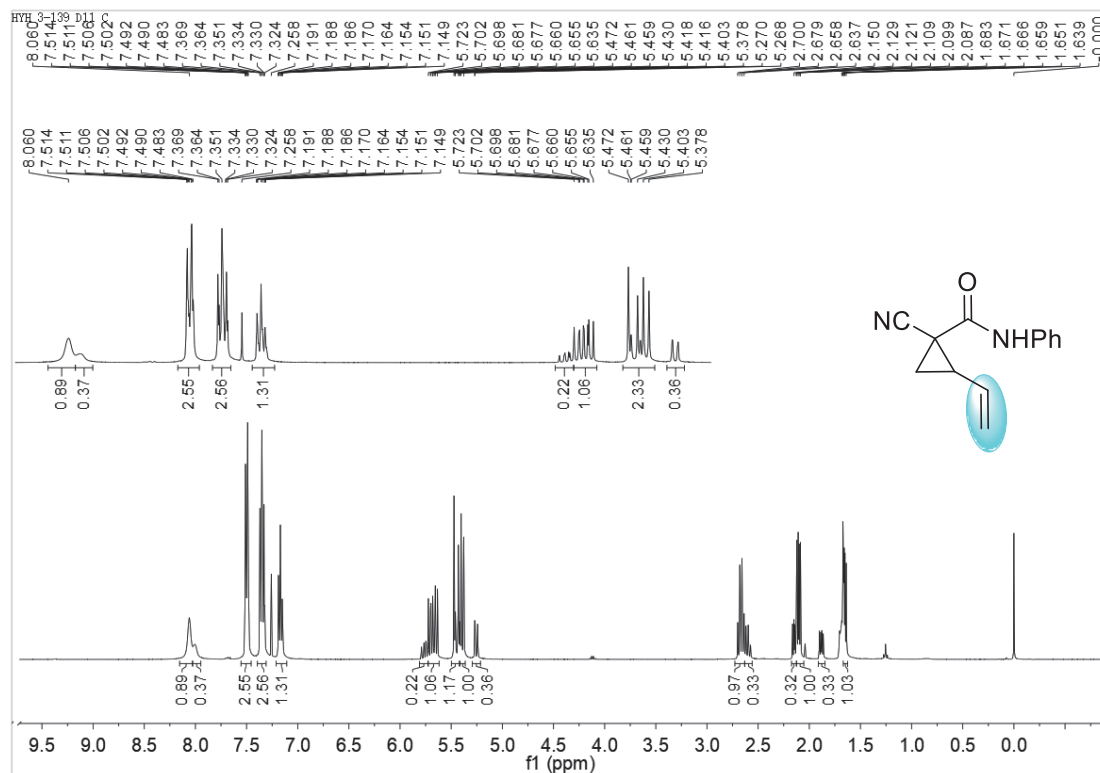

### 1'a5, <sup>13</sup>C NMR

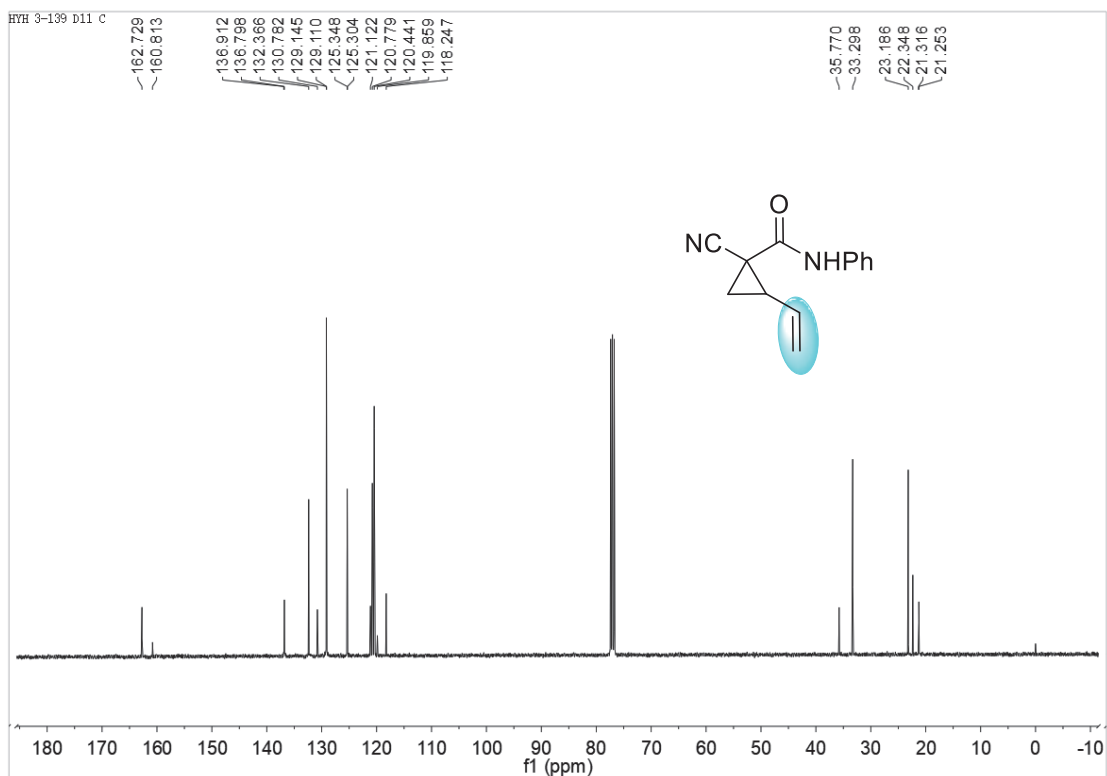



**1'a5, DEPT 90 and DEPT 135**

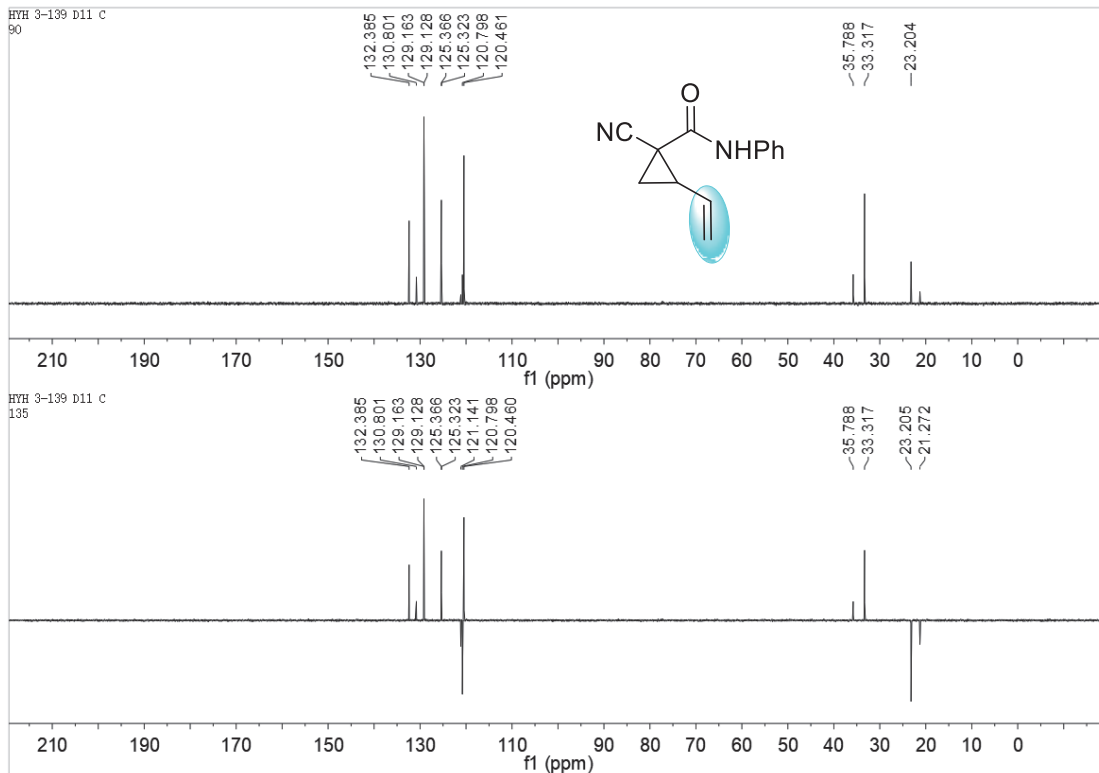

**1'b, <sup>1</sup>H NMR**

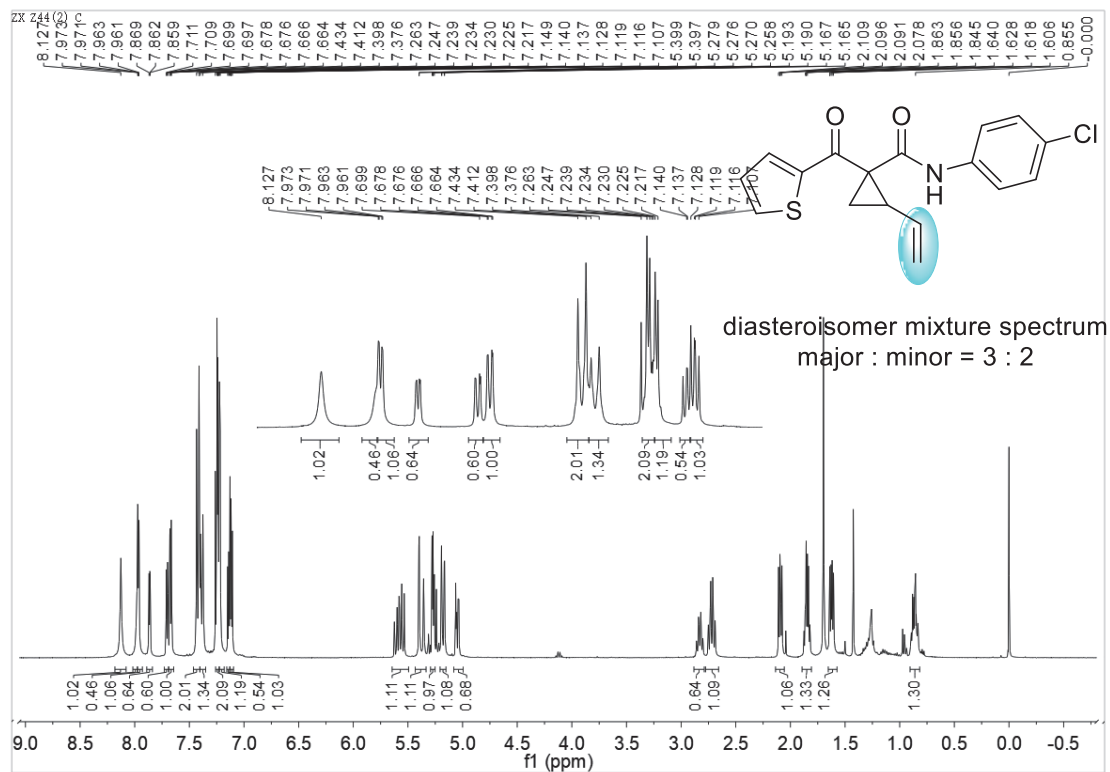

# 1'b, <sup>13</sup>C NMR

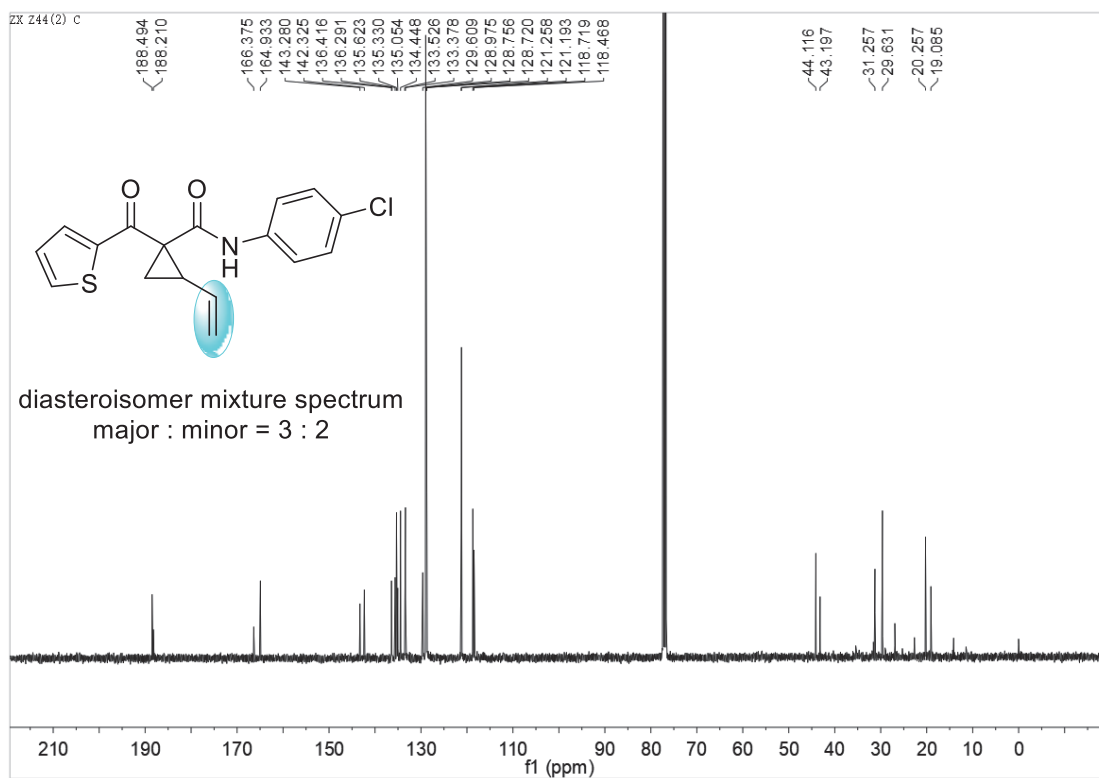

# 1'b, DEPT 90 and DEPT 135

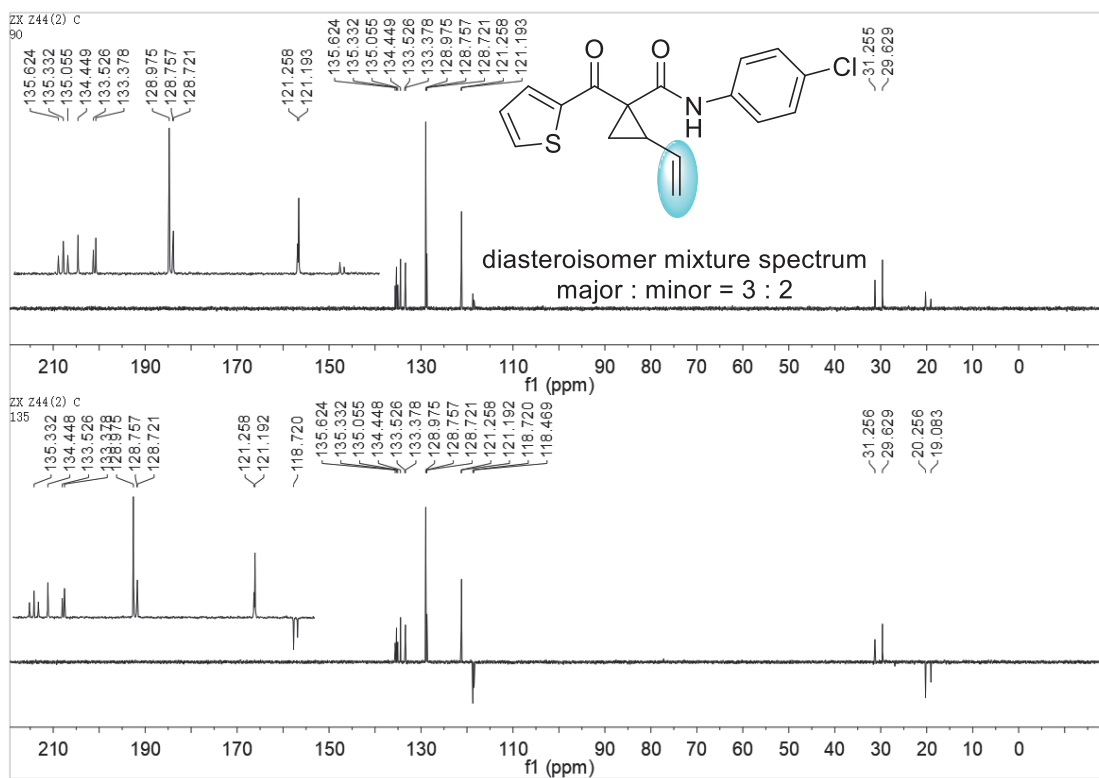

### 1'e4, <sup>1</sup>H NMR

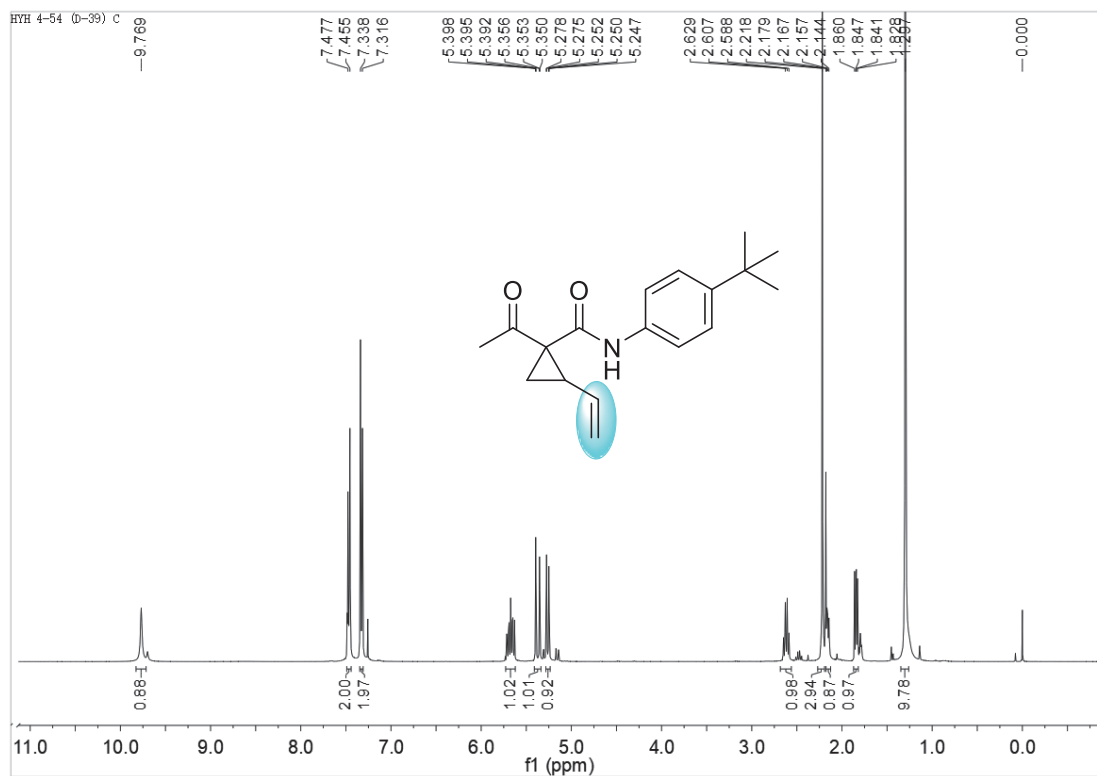

### 1'e4, <sup>13</sup>C NMR

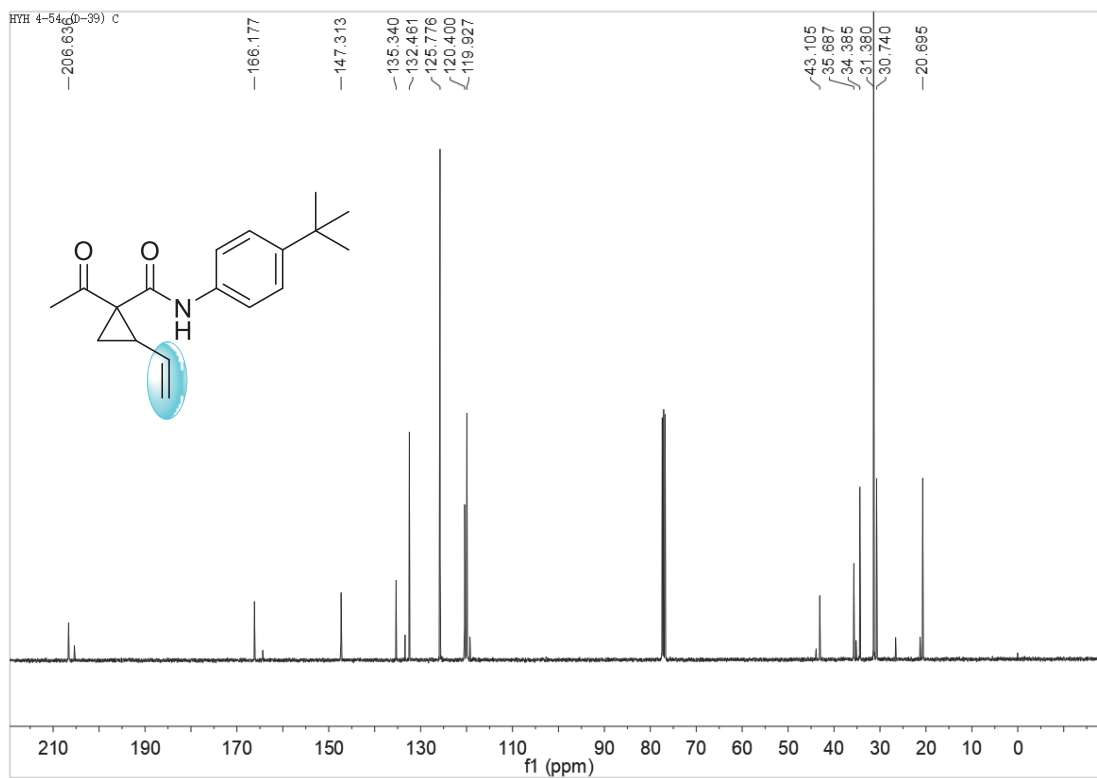

**1'e4, DEPT 90 and DEPT 135**

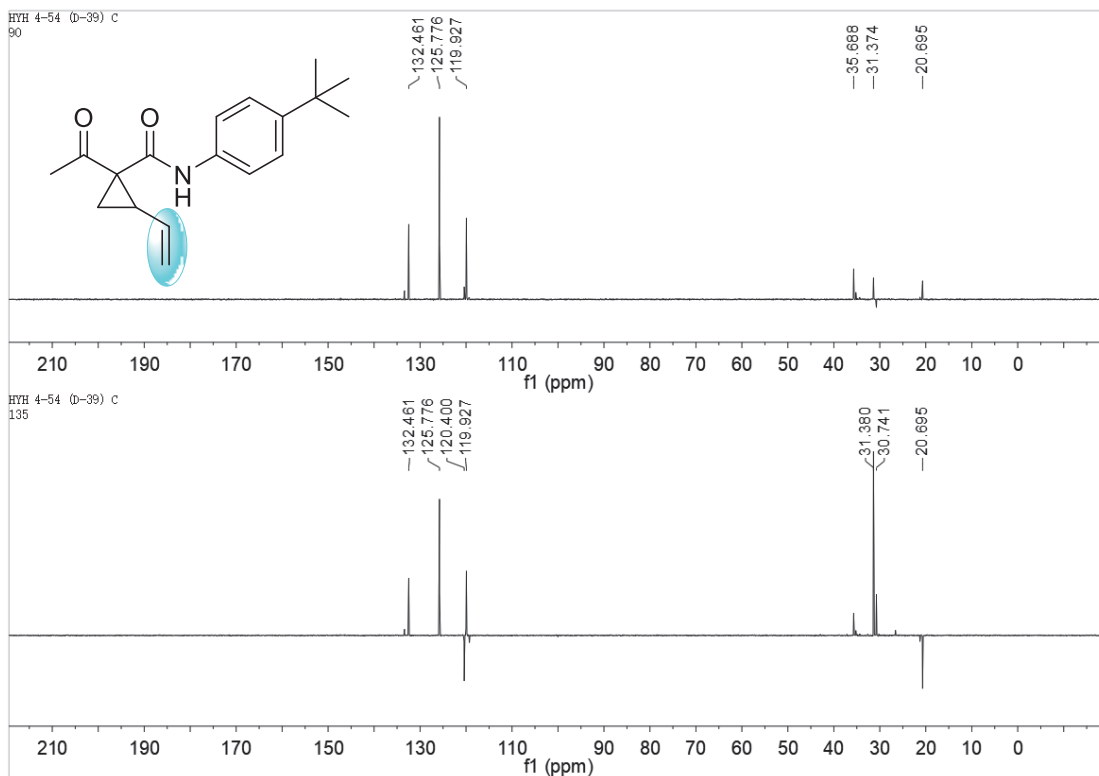

**1'f, <sup>1</sup>H NMR**

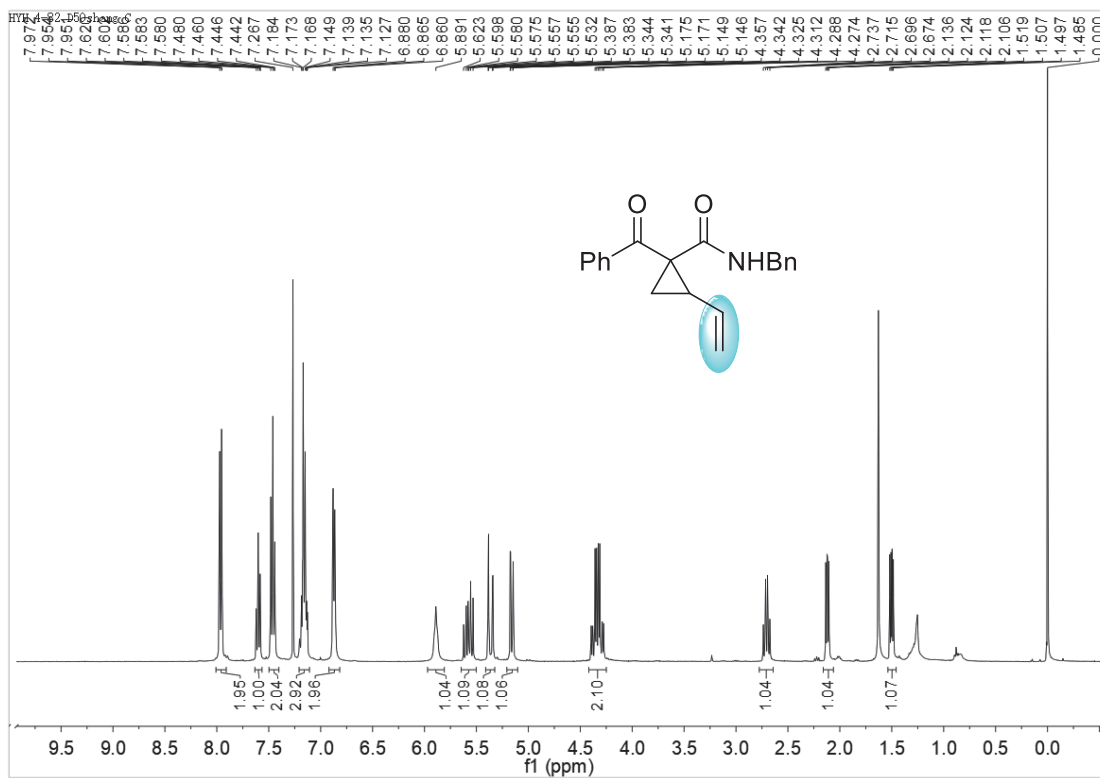

# 1f, <sup>13</sup>C NMR

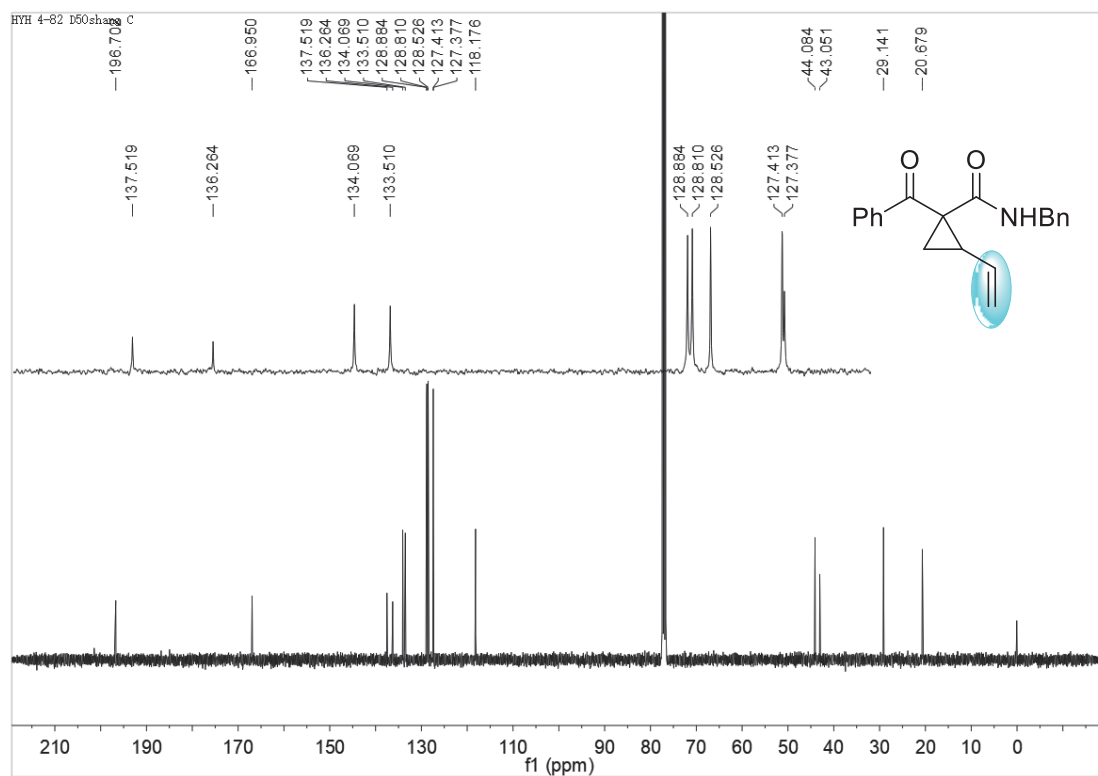

# 1f, DEPT 90 and DEPT 135

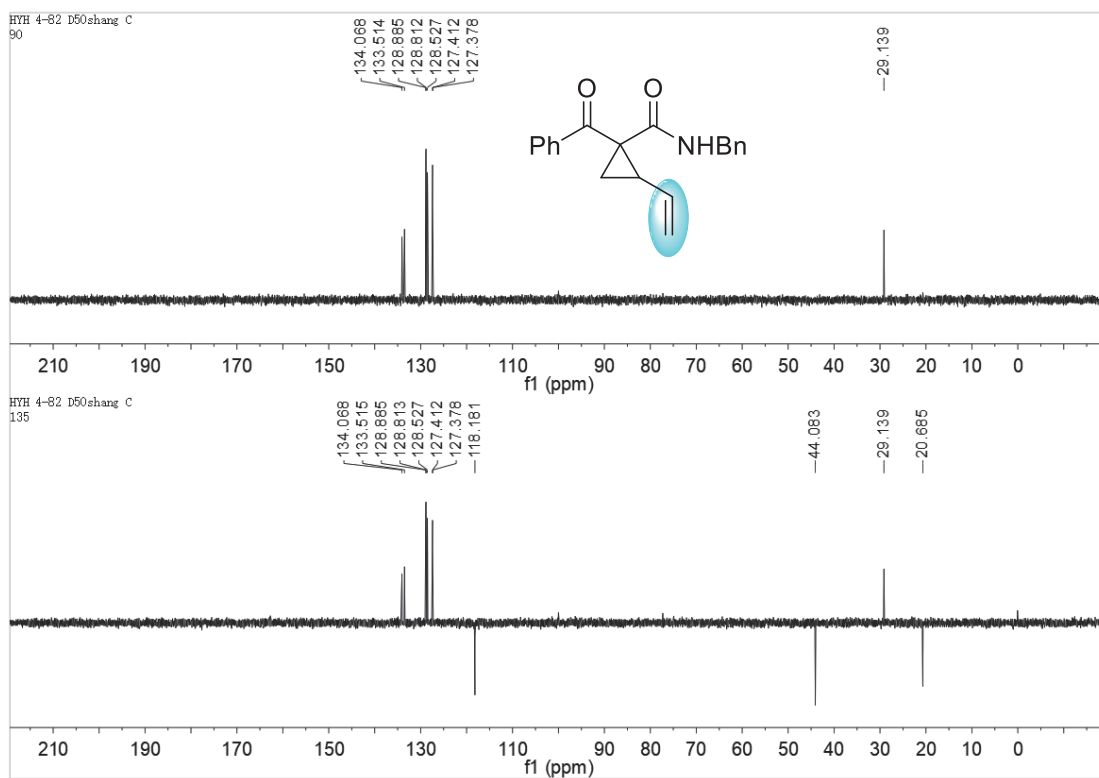

### 1'g2, <sup>1</sup>H NMR

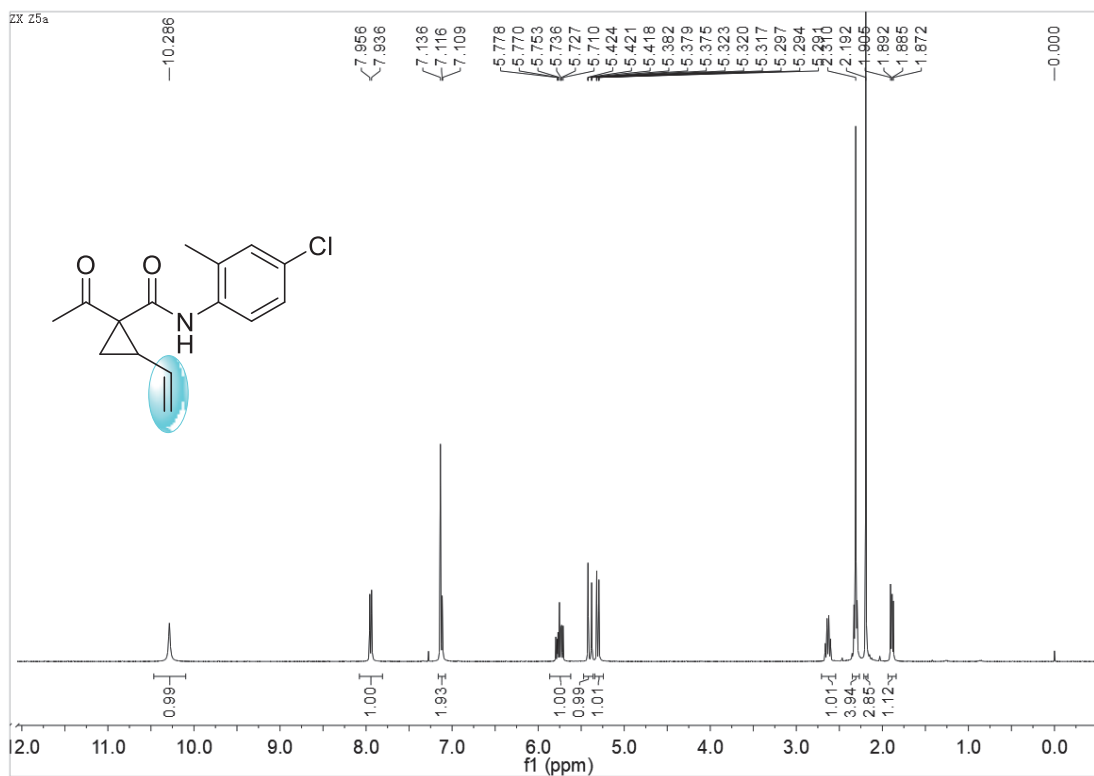

### 1'g2, <sup>13</sup>C NMR

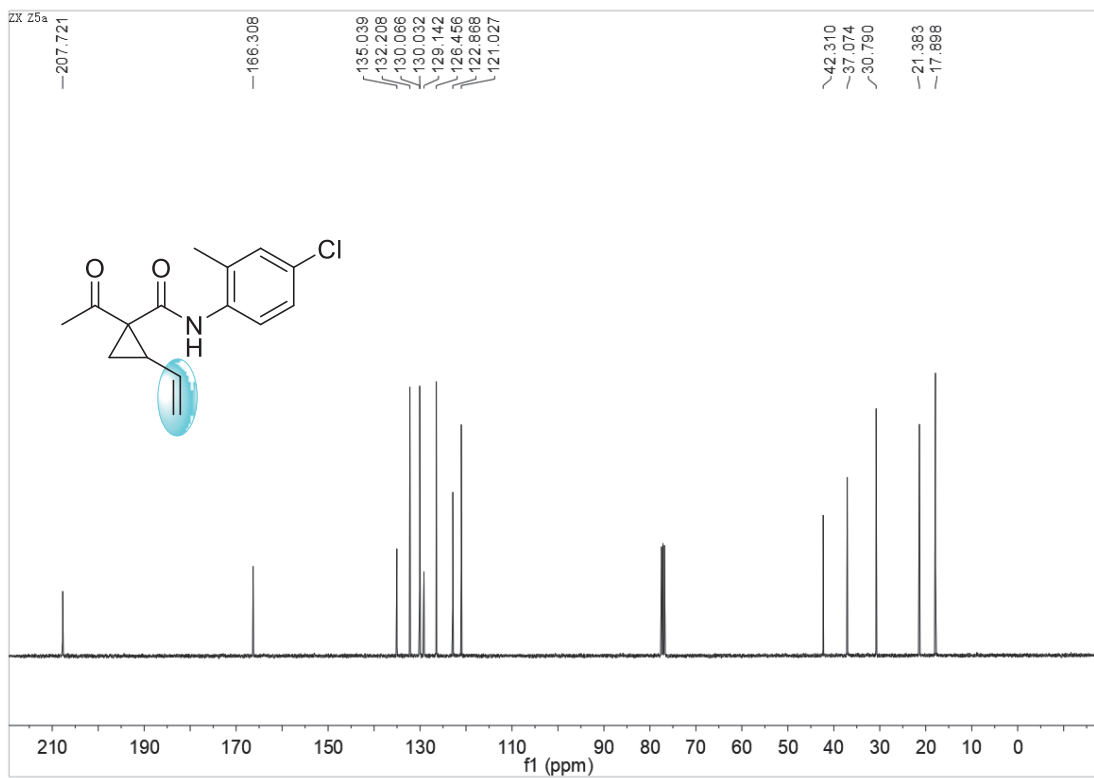

**1'g2, DEPT 90 and DEPT 135**

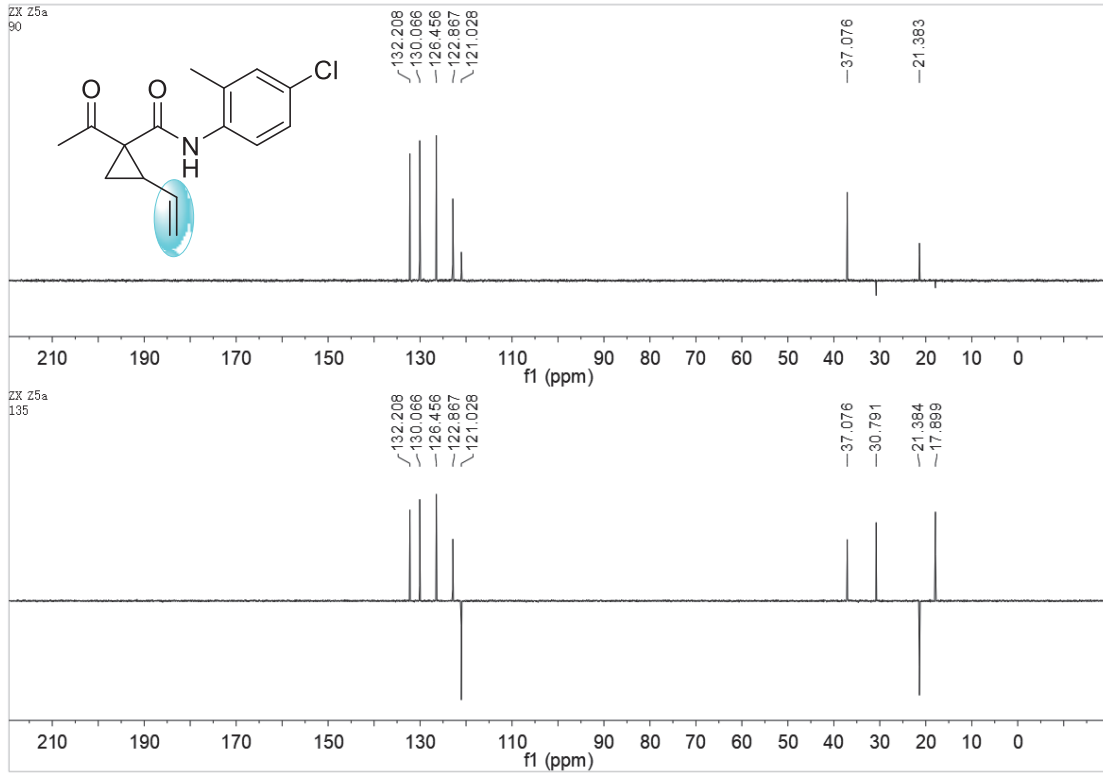

**1'i, <sup>1</sup>H NMR**

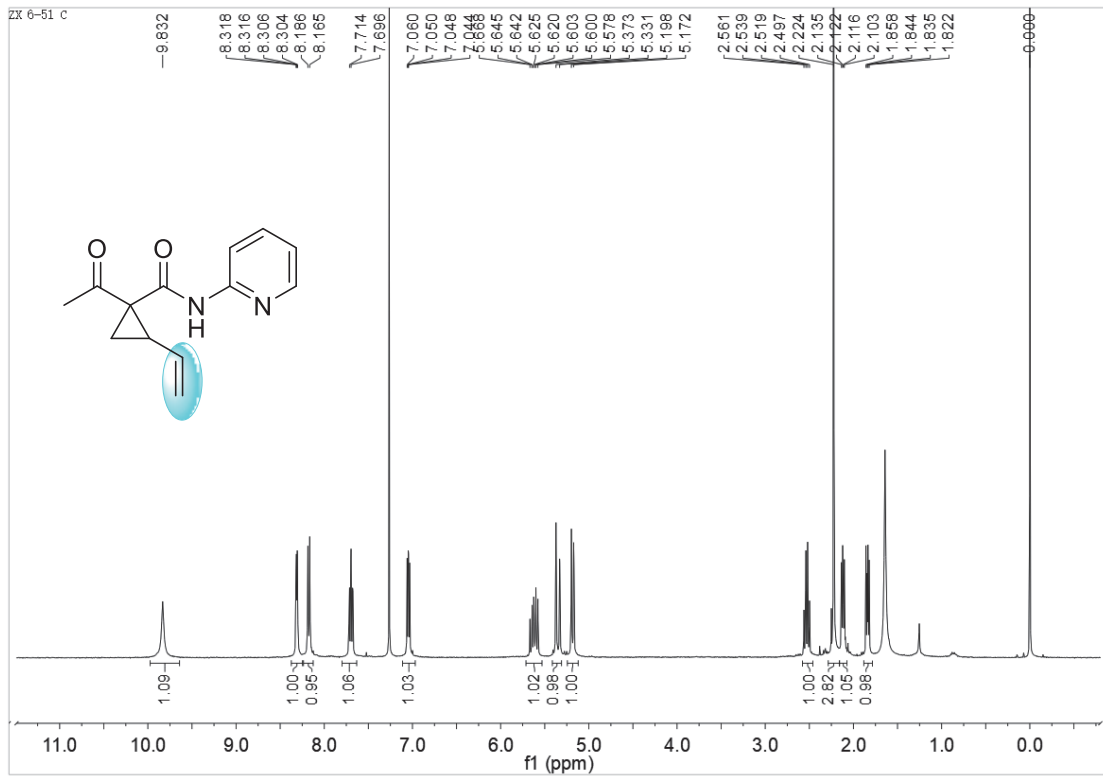

**1i, <sup>13</sup>C NMR**

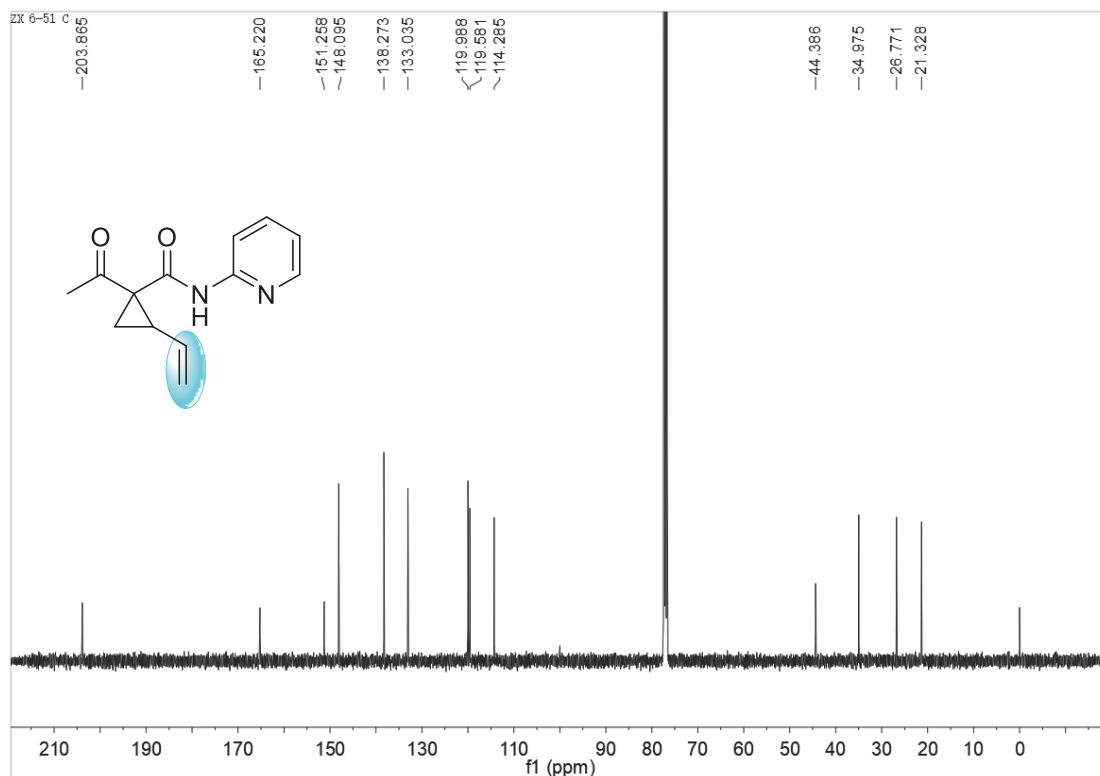

**1i, DEPT 90 and DEPT 135**

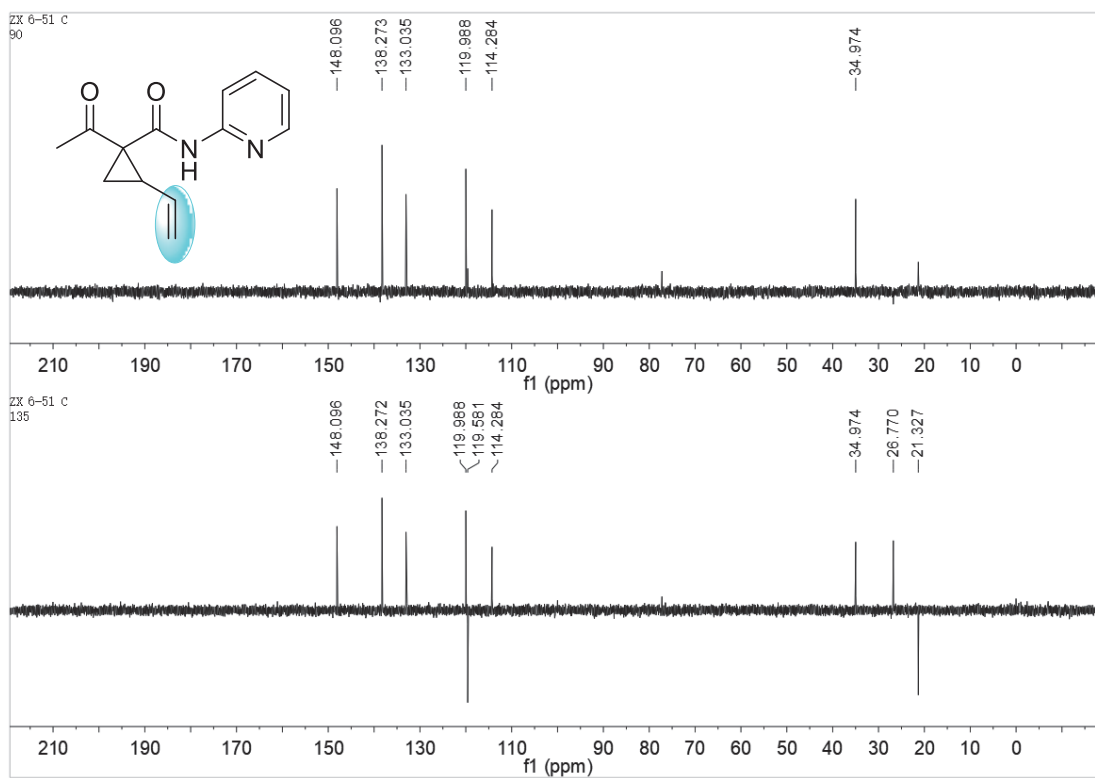



# 1'j2, <sup>1</sup>H NMR

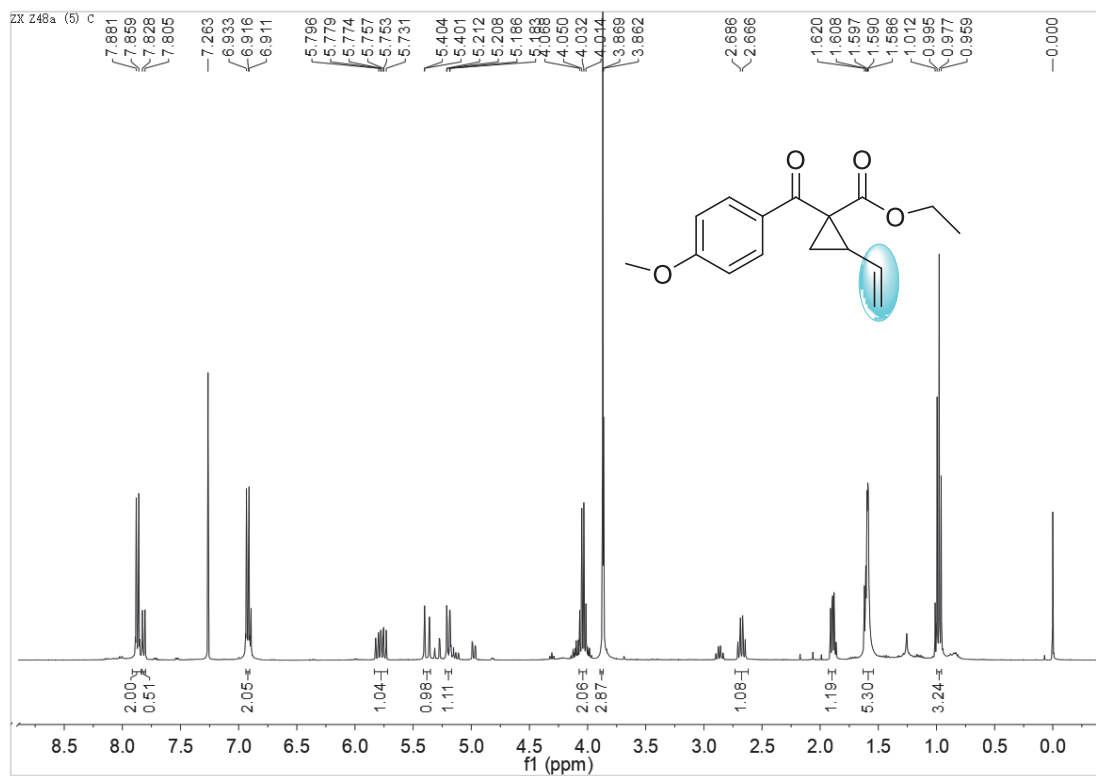

# 1'j2, <sup>13</sup>C NMR

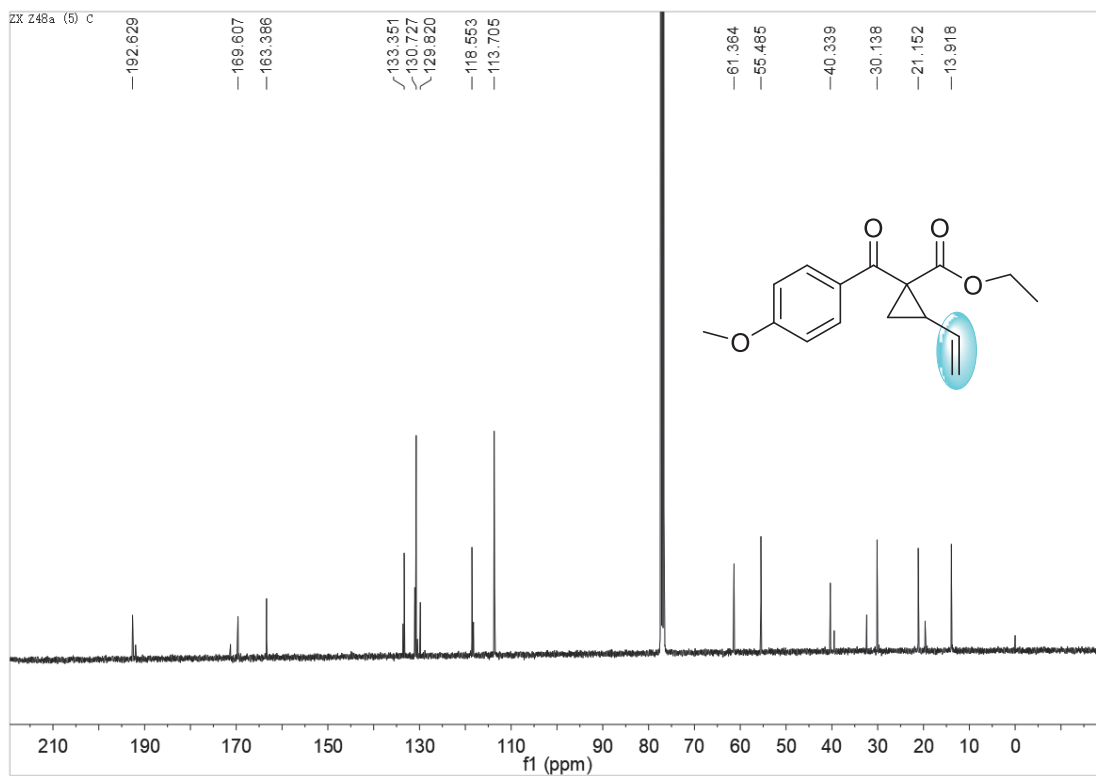

## $^{13}\text{C}$ , DEPT 90 and DEPT 135

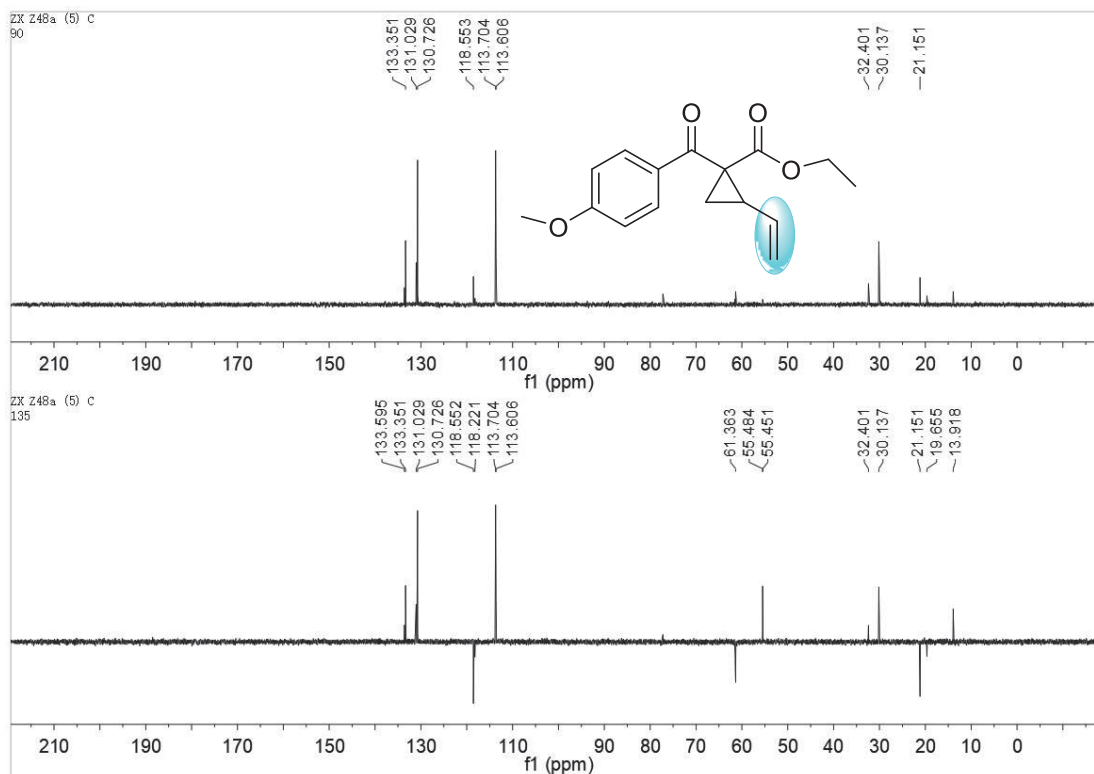

## VIII. References

1. Y. Yang, L. Tang, S. Zhang, X. Guo, Z. Zha, Z. Wang, *Green Chem.*, **2014**, *16*, 4106–4109.
2. H. Zhu, H. Zheng, J. Zhang, J. Feng, L. Kong, F. Zhang, X.-S. Xue, G. Zhu, *Chem. Sci.*, **2021**, *12*, 11420–11426.
3. Q. Ma, M. Li, Z. Chen, S.-F. Ni, J. S. Wright, L.-R. Wen, L.-B. Zhang, *Green Chem.*, **2022**, *24*, 4425–4431.
4. a) Y. Wei, G. Wang, Z. Zhang, M. Li, N. Ma, H. Wu, G. Zhang, *The Journal of Organic Chemistry*, **2024**, *89*, 1127–1139; b) G. Zhang, L. Chen, Z. Hu, Z. Zhang, J. Bi, M. Li, X. Zhang, *J. Org. Chem.*, **2023**, *88*, 1003–1017; c) X. Yang, J. Zhu, Y. Bao, Z. Ding, F. Yang, Q. Zhou, M. Chen, *Eur. J. Org. Chem.*, **2020**, *2020*, 3856–3859; d) J. M. Ryss, A. K. Turek, S. J. Miller, *Org. Lett.*, **2018**, *20*, 1621–1625; e) J. Zhang, Y. Tang, W. Wei, Y. Wu, Y. Li, J. Zhang, Y. Zheng, S. Xu, *Org. Lett.*, **2017**, *19*, 3043–3046.
